# Supplementary material for: Genomic profiling and spatial SEIR modeling of COVID-19 transmission in Western New York
Source: Front Microbiol. 2024 Sep 27;15:1416580. doi: 10.3389/fmicb.2024.1416580 (PMC11468862; doi:10.3389/fmicb.2024.1416580)
Supplement: Supplementary file 1 [file Table_1.XLSX]

## Sheet: State-Wide-Analysis
GISAID Accession
EPI_ISL_9684674
EPI_ISL_9684474
EPI_ISL_9710374
EPI_ISL_9016574
EPI_ISL_15779908
EPI_ISL_15779911
EPI_ISL_14476832
EPI_ISL_15779923
EPI_ISL_15779924
EPI_ISL_15779925
EPI_ISL_14476815
EPI_ISL_2827394
EPI_ISL_15779948
EPI_ISL_14476831
EPI_ISL_14476826
EPI_ISL_14476817
EPI_ISL_2690612
EPI_ISL_13057012
EPI_ISL_2714197
EPI_ISL_2714210
EPI_ISL_3246674
EPI_ISL_3246673
EPI_ISL_3246665
EPI_ISL_3246656
EPI_ISL_3246645
EPI_ISL_3246644
EPI_ISL_3246627
EPI_ISL_3246624
EPI_ISL_3246623
EPI_ISL_14476816
EPI_ISL_15779976
EPI_ISL_631513
EPI_ISL_3245668
EPI_ISL_3245664
EPI_ISL_3245662
EPI_ISL_3245655
EPI_ISL_3245654
EPI_ISL_3245653
EPI_ISL_3245650
EPI_ISL_3245636
EPI_ISL_15779993
EPI_ISL_3245628
EPI_ISL_3245621
EPI_ISL_3245610
EPI_ISL_3245589
EPI_ISL_3245580
EPI_ISL_3245579
EPI_ISL_3245540
EPI_ISL_3245537
EPI_ISL_3245504
EPI_ISL_3245503
EPI_ISL_3245496
EPI_ISL_3245490
EPI_ISL_3245489
EPI_ISL_15779990
EPI_ISL_15779991
EPI_ISL_3245481
EPI_ISL_3245480
EPI_ISL_3245479
EPI_ISL_3245478
EPI_ISL_3245476
EPI_ISL_3245465
EPI_ISL_2714239
EPI_ISL_15780003
EPI_ISL_936294
EPI_ISL_14222808
EPI_ISL_15780012
EPI_ISL_15768550
EPI_ISL_14476814
EPI_ISL_9685075
EPI_ISL_14476813
EPI_ISL_14476812
EPI_ISL_14476811
EPI_ISL_14476810
EPI_ISL_3243035
EPI_ISL_3243032
EPI_ISL_525663
EPI_ISL_14476809
EPI_ISL_2759213
EPI_ISL_9965587
EPI_ISL_9965680
EPI_ISL_9965685
EPI_ISL_9965687
EPI_ISL_9965690
EPI_ISL_9965692
EPI_ISL_9965695
EPI_ISL_9965701
EPI_ISL_9965703
EPI_ISL_9965811
EPI_ISL_2251456
EPI_ISL_9967762
EPI_ISL_9968262
EPI_ISL_2251277
EPI_ISL_12835561
EPI_ISL_2714342
EPI_ISL_538362
EPI_ISL_9969094
EPI_ISL_9969095
EPI_ISL_9969319
EPI_ISL_9969317
EPI_ISL_3942661
EPI_ISL_3942682
EPI_ISL_3942647
EPI_ISL_3942706
EPI_ISL_9969627
EPI_ISL_9969607
EPI_ISL_9969619
EPI_ISL_9969626
EPI_ISL_9969660
EPI_ISL_9969659
EPI_ISL_9969689
EPI_ISL_9969690
EPI_ISL_9969706
EPI_ISL_9969718
EPI_ISL_3942844
EPI_ISL_9969790
EPI_ISL_9969792
EPI_ISL_9969871
EPI_ISL_9969875
EPI_ISL_9969876
EPI_ISL_9969881
EPI_ISL_9969884
EPI_ISL_3942920
EPI_ISL_9969897
EPI_ISL_6492987
EPI_ISL_9969959
EPI_ISL_9969969
EPI_ISL_9970000
EPI_ISL_3943050
EPI_ISL_9970026
EPI_ISL_9970031
EPI_ISL_3235725
EPI_ISL_9970032
EPI_ISL_3235705
EPI_ISL_3235702
EPI_ISL_3235701
EPI_ISL_3235692
EPI_ISL_3943079
EPI_ISL_3235689
EPI_ISL_3235685
EPI_ISL_3235684
EPI_ISL_3235655
EPI_ISL_3943091
EPI_ISL_9970188
EPI_ISL_2235199
EPI_ISL_3235367
EPI_ISL_3235365
EPI_ISL_2235083
EPI_ISL_2133693
EPI_ISL_9970295
EPI_ISL_9970300
EPI_ISL_9775675
EPI_ISL_824313
EPI_ISL_5019934
EPI_ISL_5019933
EPI_ISL_5019932
EPI_ISL_5019931
EPI_ISL_5019930
EPI_ISL_5019929
EPI_ISL_9970485
EPI_ISL_9970483
EPI_ISL_9970492
EPI_ISL_9804475
EPI_ISL_9804275
EPI_ISL_9970526
EPI_ISL_3234364
EPI_ISL_3234363
EPI_ISL_3234359
EPI_ISL_3234352
EPI_ISL_3234345
EPI_ISL_3234325
EPI_ISL_3234318
EPI_ISL_3234296
EPI_ISL_3234290
EPI_ISL_3234280
EPI_ISL_3234256
EPI_ISL_3234255
EPI_ISL_3234250
EPI_ISL_3234240
EPI_ISL_3234234
EPI_ISL_3234230
EPI_ISL_3234229
EPI_ISL_3234227
EPI_ISL_3234226
EPI_ISL_3234200
EPI_ISL_3234195
EPI_ISL_3234184
EPI_ISL_3234180
EPI_ISL_3234175
EPI_ISL_3234166
EPI_ISL_3234163
EPI_ISL_3234155
EPI_ISL_3234127
EPI_ISL_3234099
EPI_ISL_3234068
EPI_ISL_3234054
EPI_ISL_3234050
EPI_ISL_3234047
EPI_ISL_3234033
EPI_ISL_3234024
EPI_ISL_3234020
EPI_ISL_3234012
EPI_ISL_3234009
EPI_ISL_3233984
EPI_ISL_3233966
EPI_ISL_3233962
EPI_ISL_3233959
EPI_ISL_3233942
EPI_ISL_3233929
EPI_ISL_3233928
EPI_ISL_3233925
EPI_ISL_3233918
EPI_ISL_3233888
EPI_ISL_3233860
EPI_ISL_3233859
EPI_ISL_3233821
EPI_ISL_3233817
EPI_ISL_3233799
EPI_ISL_6493061
EPI_ISL_3233793
EPI_ISL_3233790
EPI_ISL_3233787
EPI_ISL_3233784
EPI_ISL_3233782
EPI_ISL_3233779
EPI_ISL_3233745
EPI_ISL_3233737
EPI_ISL_3233736
EPI_ISL_3233723
EPI_ISL_3233721
EPI_ISL_6493062
EPI_ISL_3233720
EPI_ISL_3233719
EPI_ISL_3233714
EPI_ISL_3233711
EPI_ISL_3233704
EPI_ISL_3233703
EPI_ISL_3233699
EPI_ISL_3233695
EPI_ISL_3233692
EPI_ISL_3233689
EPI_ISL_3233680
EPI_ISL_3233679
EPI_ISL_3233660
EPI_ISL_3233656
EPI_ISL_3233649
EPI_ISL_3233648
EPI_ISL_3233644
EPI_ISL_3233631
EPI_ISL_9051720
EPI_ISL_9970880
EPI_ISL_9096175
EPI_ISL_9096275
EPI_ISL_9135875
EPI_ISL_9138075
EPI_ISL_9142475
EPI_ISL_9142875
EPI_ISL_8304975
EPI_ISL_9971305
EPI_ISL_9971331
EPI_ISL_8544175
EPI_ISL_9971335
EPI_ISL_3232463
EPI_ISL_3232460
EPI_ISL_3232459
EPI_ISL_3232457
EPI_ISL_3232456
EPI_ISL_3232453
EPI_ISL_3232452
EPI_ISL_3232448
EPI_ISL_3232444
EPI_ISL_3232441
EPI_ISL_3232437
EPI_ISL_3232430
EPI_ISL_3232428
EPI_ISL_3232427
EPI_ISL_5017902
EPI_ISL_5017901
EPI_ISL_5017900
EPI_ISL_5017899
EPI_ISL_5017898
EPI_ISL_5017896
EPI_ISL_5017894
EPI_ISL_5017893
EPI_ISL_5017888
EPI_ISL_5017887
EPI_ISL_3232426
EPI_ISL_5017884
EPI_ISL_3232425
EPI_ISL_5017883
EPI_ISL_5017882
EPI_ISL_5017881
EPI_ISL_5017880
EPI_ISL_5017879
EPI_ISL_5017878
EPI_ISL_5017877
EPI_ISL_5017876
EPI_ISL_5017875
EPI_ISL_3232423
EPI_ISL_5017874
EPI_ISL_5017873
EPI_ISL_5017872
EPI_ISL_5017871
EPI_ISL_5017869
EPI_ISL_5017868
EPI_ISL_5017867
EPI_ISL_5017866
EPI_ISL_5017865
EPI_ISL_5017864
EPI_ISL_5017863
EPI_ISL_5017862
EPI_ISL_5017861
EPI_ISL_5017860
EPI_ISL_5017859
EPI_ISL_5017858
EPI_ISL_5017857
EPI_ISL_5017856
EPI_ISL_5017855
EPI_ISL_5017854
EPI_ISL_5017853
EPI_ISL_3232422
EPI_ISL_5017852
EPI_ISL_3232414
EPI_ISL_5017851
EPI_ISL_3232405
EPI_ISL_5017850
EPI_ISL_5017849
EPI_ISL_5017848
EPI_ISL_5017847
EPI_ISL_9971365
EPI_ISL_5017846
EPI_ISL_5017845
EPI_ISL_5017844
EPI_ISL_5017843
EPI_ISL_5017842
EPI_ISL_5017841
EPI_ISL_3232403
EPI_ISL_9971367
EPI_ISL_5017840
EPI_ISL_5017839
EPI_ISL_5017837
EPI_ISL_3232402
EPI_ISL_5017836
EPI_ISL_5017835
EPI_ISL_5017834
EPI_ISL_5017833
EPI_ISL_5017832
EPI_ISL_5017831
EPI_ISL_5017830
EPI_ISL_5017829
EPI_ISL_5017828
EPI_ISL_5017827
EPI_ISL_5017826
EPI_ISL_5017825
EPI_ISL_5017824
EPI_ISL_5017823
EPI_ISL_5017822
EPI_ISL_5017821
EPI_ISL_5017818
EPI_ISL_5017817
EPI_ISL_5017816
EPI_ISL_5017815
EPI_ISL_9971370
EPI_ISL_5017814
EPI_ISL_3232400
EPI_ISL_5017813
EPI_ISL_5017812
EPI_ISL_3232384
EPI_ISL_9971372
EPI_ISL_5017811
EPI_ISL_5017810
EPI_ISL_3232381
EPI_ISL_3232378
EPI_ISL_5017809
EPI_ISL_5017808
EPI_ISL_5017807
EPI_ISL_3232372
EPI_ISL_5017806
EPI_ISL_5017805
EPI_ISL_5017804
EPI_ISL_5017803
EPI_ISL_5017802
EPI_ISL_5017801
EPI_ISL_5017800
EPI_ISL_5017799
EPI_ISL_5017798
EPI_ISL_5017797
EPI_ISL_3232369
EPI_ISL_3232366
EPI_ISL_5017796
EPI_ISL_5017795
EPI_ISL_5017794
EPI_ISL_9971380
EPI_ISL_5017793
EPI_ISL_5017792
EPI_ISL_5017791
EPI_ISL_3232364
EPI_ISL_9971382
EPI_ISL_5017790
EPI_ISL_5017789
EPI_ISL_5017788
EPI_ISL_3232362
EPI_ISL_5017784
EPI_ISL_5017783
EPI_ISL_5017782
EPI_ISL_5017781
EPI_ISL_5017779
EPI_ISL_5017778
EPI_ISL_5017777
EPI_ISL_5017776
EPI_ISL_5017775
EPI_ISL_5017774
EPI_ISL_5017773
EPI_ISL_5017772
EPI_ISL_5017771
EPI_ISL_5017770
EPI_ISL_3232360
EPI_ISL_5017769
EPI_ISL_5017768
EPI_ISL_5017764
EPI_ISL_5017763
EPI_ISL_5017762
EPI_ISL_5017760
EPI_ISL_3232356
EPI_ISL_5017759
EPI_ISL_5017758
EPI_ISL_9971386
EPI_ISL_5017757
EPI_ISL_3232347
EPI_ISL_5017756
EPI_ISL_5017755
EPI_ISL_5017754
EPI_ISL_5017753
EPI_ISL_5017752
EPI_ISL_5017750
EPI_ISL_5017749
EPI_ISL_5017748
EPI_ISL_3232338
EPI_ISL_3232333
EPI_ISL_5017747
EPI_ISL_5017746
EPI_ISL_5017745
EPI_ISL_5017744
EPI_ISL_5017743
EPI_ISL_5017742
EPI_ISL_5017741
EPI_ISL_5017740
EPI_ISL_5017739
EPI_ISL_5017738
EPI_ISL_5017737
EPI_ISL_5017736
EPI_ISL_5017735
EPI_ISL_5017734
EPI_ISL_3232331
EPI_ISL_5017733
EPI_ISL_5017732
EPI_ISL_3232321
EPI_ISL_5017731
EPI_ISL_5017730
EPI_ISL_9971391
EPI_ISL_5017729
EPI_ISL_3232312
EPI_ISL_5017728
EPI_ISL_5017727
EPI_ISL_5017726
EPI_ISL_5017725
EPI_ISL_5017724
EPI_ISL_5017723
EPI_ISL_5017722
EPI_ISL_3232307
EPI_ISL_5017721
EPI_ISL_5017720
EPI_ISL_5017717
EPI_ISL_5017716
EPI_ISL_5017715
EPI_ISL_5017714
EPI_ISL_5017713
EPI_ISL_5017712
EPI_ISL_3232305
EPI_ISL_5017711
EPI_ISL_5017710
EPI_ISL_5017709
EPI_ISL_5017708
EPI_ISL_5017707
EPI_ISL_3232303
EPI_ISL_5017706
EPI_ISL_5017705
EPI_ISL_9971397
EPI_ISL_5017704
EPI_ISL_5017703
EPI_ISL_5017702
EPI_ISL_5017701
EPI_ISL_5017700
EPI_ISL_5017699
EPI_ISL_5017694
EPI_ISL_5017693
EPI_ISL_5017691
EPI_ISL_5017690
EPI_ISL_5017689
EPI_ISL_5017688
EPI_ISL_5017687
EPI_ISL_3232302
EPI_ISL_5017686
EPI_ISL_5017685
EPI_ISL_5017682
EPI_ISL_5017681
EPI_ISL_3232293
EPI_ISL_5017680
EPI_ISL_5017679
EPI_ISL_3232290
EPI_ISL_5017678
EPI_ISL_5017677
EPI_ISL_3232279
EPI_ISL_9971399
EPI_ISL_5017676
EPI_ISL_5017675
EPI_ISL_3232263
EPI_ISL_5017674
EPI_ISL_5017673
EPI_ISL_5017672
EPI_ISL_5017671
EPI_ISL_5017670
EPI_ISL_5017668
EPI_ISL_5017666
EPI_ISL_5017665
EPI_ISL_5017664
EPI_ISL_5017663
EPI_ISL_5017661
EPI_ISL_5017660
EPI_ISL_5017659
EPI_ISL_5017658
EPI_ISL_5017657
EPI_ISL_5017656
EPI_ISL_5017655
EPI_ISL_5017654
EPI_ISL_5017653
EPI_ISL_5017652
EPI_ISL_5017651
EPI_ISL_3232262
EPI_ISL_5017650
EPI_ISL_5017648
EPI_ISL_5017647
EPI_ISL_5017646
EPI_ISL_5017645
EPI_ISL_5017644
EPI_ISL_5017643
EPI_ISL_5017642
EPI_ISL_5017641
EPI_ISL_5017640
EPI_ISL_5017639
EPI_ISL_5017638
EPI_ISL_5017637
EPI_ISL_5017636
EPI_ISL_3232261
EPI_ISL_3232260
EPI_ISL_5017635
EPI_ISL_5017634
EPI_ISL_5017633
EPI_ISL_5017632
EPI_ISL_5017631
EPI_ISL_3232258
EPI_ISL_5017630
EPI_ISL_3232248
EPI_ISL_5017629
EPI_ISL_3232245
EPI_ISL_5017628
EPI_ISL_5017627
EPI_ISL_5017625
EPI_ISL_5017624
EPI_ISL_5017623
EPI_ISL_5017617
EPI_ISL_5017616
EPI_ISL_5017615
EPI_ISL_5017614
EPI_ISL_5017613
EPI_ISL_5017612
EPI_ISL_5017611
EPI_ISL_5017610
EPI_ISL_5017608
EPI_ISL_5017607
EPI_ISL_5017606
EPI_ISL_5017605
EPI_ISL_5017603
EPI_ISL_5017602
EPI_ISL_5017601
EPI_ISL_5017600
EPI_ISL_5017599
EPI_ISL_5017598
EPI_ISL_9971408
EPI_ISL_5017597
EPI_ISL_5017596
EPI_ISL_5017595
EPI_ISL_5017594
EPI_ISL_5017593
EPI_ISL_5017592
EPI_ISL_5017591
EPI_ISL_5017590
EPI_ISL_5017589
EPI_ISL_5017588
EPI_ISL_5017587
EPI_ISL_5017586
EPI_ISL_5017585
EPI_ISL_5017584
EPI_ISL_5017583
EPI_ISL_5017582
EPI_ISL_5017581
EPI_ISL_5017579
EPI_ISL_5017577
EPI_ISL_5017576
EPI_ISL_5017575
EPI_ISL_5017574
EPI_ISL_5017572
EPI_ISL_5017571
EPI_ISL_5017570
EPI_ISL_5017569
EPI_ISL_5017568
EPI_ISL_5017567
EPI_ISL_5017566
EPI_ISL_5017565
EPI_ISL_5017564
EPI_ISL_5017563
EPI_ISL_5017562
EPI_ISL_5017561
EPI_ISL_5017560
EPI_ISL_5017559
EPI_ISL_5017558
EPI_ISL_5017557
EPI_ISL_5017556
EPI_ISL_5017551
EPI_ISL_5017550
EPI_ISL_5017548
EPI_ISL_9971417
EPI_ISL_5017547
EPI_ISL_5017546
EPI_ISL_5017545
EPI_ISL_5017544
EPI_ISL_5017543
EPI_ISL_5017542
EPI_ISL_5017541
EPI_ISL_5017540
EPI_ISL_5017538
EPI_ISL_5017536
EPI_ISL_5017535
EPI_ISL_5017534
EPI_ISL_5017533
EPI_ISL_5017532
EPI_ISL_5017531
EPI_ISL_5017530
EPI_ISL_5017528
EPI_ISL_5017527
EPI_ISL_5017526
EPI_ISL_5017525
EPI_ISL_5017524
EPI_ISL_5017523
EPI_ISL_5017521
EPI_ISL_5017520
EPI_ISL_5017519
EPI_ISL_5017517
EPI_ISL_5017516
EPI_ISL_5017515
EPI_ISL_5017514
EPI_ISL_5017513
EPI_ISL_5017512
EPI_ISL_5017511
EPI_ISL_5017510
EPI_ISL_5017509
EPI_ISL_5017508
EPI_ISL_5017507
EPI_ISL_5017506
EPI_ISL_5017505
EPI_ISL_5017504
EPI_ISL_5017502
EPI_ISL_5017501
EPI_ISL_5017500
EPI_ISL_5017499
EPI_ISL_5017498
EPI_ISL_5017495
EPI_ISL_5017494
EPI_ISL_5017493
EPI_ISL_5017492
EPI_ISL_5017491
EPI_ISL_5017490
EPI_ISL_5017489
EPI_ISL_5017488
EPI_ISL_5017487
EPI_ISL_5017486
EPI_ISL_5017485
EPI_ISL_5017483
EPI_ISL_5017477
EPI_ISL_5017476
EPI_ISL_5017475
EPI_ISL_5017474
EPI_ISL_5017473
EPI_ISL_5017472
EPI_ISL_5017470
EPI_ISL_5017469
EPI_ISL_5017468
EPI_ISL_5017467
EPI_ISL_5017466
EPI_ISL_5017465
EPI_ISL_5017464
EPI_ISL_5017463
EPI_ISL_5017462
EPI_ISL_5017461
EPI_ISL_5017460
EPI_ISL_5017459
EPI_ISL_5017458
EPI_ISL_5017457
EPI_ISL_5017456
EPI_ISL_5017455
EPI_ISL_5017454
EPI_ISL_5017453
EPI_ISL_5017452
EPI_ISL_5017451
EPI_ISL_5017450
EPI_ISL_5017449
EPI_ISL_5017448
EPI_ISL_5017447
EPI_ISL_5017445
EPI_ISL_5017444
EPI_ISL_5017443
EPI_ISL_5017442
EPI_ISL_5017441
EPI_ISL_5017440
EPI_ISL_5017439
EPI_ISL_5017438
EPI_ISL_5017437
EPI_ISL_5017436
EPI_ISL_5017435
EPI_ISL_5017434
EPI_ISL_5017433
EPI_ISL_5017432
EPI_ISL_5017431
EPI_ISL_5017430
EPI_ISL_5017429
EPI_ISL_5017428
EPI_ISL_5017427
EPI_ISL_5017426
EPI_ISL_5017425
EPI_ISL_5017424
EPI_ISL_5017423
EPI_ISL_5017422
EPI_ISL_5017421
EPI_ISL_5017420
EPI_ISL_5017418
EPI_ISL_5017417
EPI_ISL_5017416
EPI_ISL_5017415
EPI_ISL_5017414
EPI_ISL_5017413
EPI_ISL_5017412
EPI_ISL_5017411
EPI_ISL_5017410
EPI_ISL_5017409
EPI_ISL_5017408
EPI_ISL_5017407
EPI_ISL_5017406
EPI_ISL_5017405
EPI_ISL_5017404
EPI_ISL_5017403
EPI_ISL_5017402
EPI_ISL_5017401
EPI_ISL_5017400
EPI_ISL_5017399
EPI_ISL_5017398
EPI_ISL_5017397
EPI_ISL_5017396
EPI_ISL_5017395
EPI_ISL_5017394
EPI_ISL_5017392
EPI_ISL_5017391
EPI_ISL_5017390
EPI_ISL_5017388
EPI_ISL_5017387
EPI_ISL_5017386
EPI_ISL_5017385
EPI_ISL_5017384
EPI_ISL_5017383
EPI_ISL_5017382
EPI_ISL_9028275
EPI_ISL_5017381
EPI_ISL_5017380
EPI_ISL_5017379
EPI_ISL_5017378
EPI_ISL_5017377
EPI_ISL_5017376
EPI_ISL_5017375
EPI_ISL_5017374
EPI_ISL_5017373
EPI_ISL_5017372
EPI_ISL_5017371
EPI_ISL_5017370
EPI_ISL_5017369
EPI_ISL_5017368
EPI_ISL_5017367
EPI_ISL_5017366
EPI_ISL_5017365
EPI_ISL_5017363
EPI_ISL_5017362
EPI_ISL_5017361
EPI_ISL_5017360
EPI_ISL_5017359
EPI_ISL_5017358
EPI_ISL_5017357
EPI_ISL_5017356
EPI_ISL_5017355
EPI_ISL_6493193
EPI_ISL_5017354
EPI_ISL_5017353
EPI_ISL_5017352
EPI_ISL_5017351
EPI_ISL_5017350
EPI_ISL_5017349
EPI_ISL_5017348
EPI_ISL_5017347
EPI_ISL_5017346
EPI_ISL_5017345
EPI_ISL_5017344
EPI_ISL_5017343
EPI_ISL_5017341
EPI_ISL_5017340
EPI_ISL_5017339
EPI_ISL_5017338
EPI_ISL_5017337
EPI_ISL_7872575
EPI_ISL_9971505
EPI_ISL_9971507
EPI_ISL_9971539
EPI_ISL_9971547
EPI_ISL_9971565
EPI_ISL_9971570
EPI_ISL_9971572
EPI_ISL_9971575
EPI_ISL_9971578
EPI_ISL_9971583
EPI_ISL_9971588
EPI_ISL_9971594
EPI_ISL_9971610
EPI_ISL_9971627
EPI_ISL_9137675
EPI_ISL_9136275
EPI_ISL_9143075
EPI_ISL_8869575
EPI_ISL_9971653
EPI_ISL_9971673
EPI_ISL_8715675
EPI_ISL_6493180
EPI_ISL_1098413
EPI_ISL_8842875
EPI_ISL_9971838
EPI_ISL_9971842
EPI_ISL_9971852
EPI_ISL_9971859
EPI_ISL_8924375
EPI_ISL_9971865
EPI_ISL_9971867
EPI_ISL_8304575
EPI_ISL_8093175
EPI_ISL_8372575
EPI_ISL_6493224
EPI_ISL_7872775
EPI_ISL_9971878
EPI_ISL_8871175
EPI_ISL_9971880
EPI_ISL_8630775
EPI_ISL_8306175
EPI_ISL_8324675
EPI_ISL_9348375
EPI_ISL_10020275
EPI_ISL_10020375
EPI_ISL_5015033
EPI_ISL_5015032
EPI_ISL_5015031
EPI_ISL_5015030
EPI_ISL_5015029
EPI_ISL_5015028
EPI_ISL_5015027
EPI_ISL_9971975
EPI_ISL_12174663
EPI_ISL_9972034
EPI_ISL_9972036
EPI_ISL_9972041
EPI_ISL_9972043
EPI_ISL_9972055
EPI_ISL_9972057
EPI_ISL_6493255
EPI_ISL_6493256
EPI_ISL_10132075
EPI_ISL_10132275
EPI_ISL_9972244
EPI_ISL_9972251
EPI_ISL_9972256
EPI_ISL_9972260
EPI_ISL_9972263
EPI_ISL_9972270
EPI_ISL_9972272
EPI_ISL_9972274
EPI_ISL_9972279
EPI_ISL_9972281
EPI_ISL_9972283
EPI_ISL_9972293
EPI_ISL_7126328
EPI_ISL_9972301
EPI_ISL_9972307
EPI_ISL_9972311
EPI_ISL_9972312
EPI_ISL_9972314
EPI_ISL_9972343
EPI_ISL_9972333
EPI_ISL_9972391
EPI_ISL_9972446
EPI_ISL_9972478
EPI_ISL_9972480
EPI_ISL_9972482
EPI_ISL_9972490
EPI_ISL_9972502
EPI_ISL_9972516
EPI_ISL_9972517
EPI_ISL_9972537
EPI_ISL_9972539
EPI_ISL_9972555
EPI_ISL_9972578
EPI_ISL_10270475
EPI_ISL_10270675
EPI_ISL_9972587
EPI_ISL_9972596
EPI_ISL_9972597
EPI_ISL_9972602
EPI_ISL_9972604
EPI_ISL_9972607
EPI_ISL_9972608
EPI_ISL_7124589
EPI_ISL_9972611
EPI_ISL_7124599
EPI_ISL_7126302
EPI_ISL_7126301
EPI_ISL_9972692
EPI_ISL_9972739
EPI_ISL_9972715
EPI_ISL_7125860
EPI_ISL_7125863
EPI_ISL_9972730
EPI_ISL_9972732
EPI_ISL_9972737
EPI_ISL_9972750
EPI_ISL_9972791
EPI_ISL_9972799
EPI_ISL_13057011
EPI_ISL_5009537
EPI_ISL_5009535
EPI_ISL_5009528
EPI_ISL_5009527
EPI_ISL_5009526
EPI_ISL_5009525
EPI_ISL_5009521
EPI_ISL_5009519
EPI_ISL_5009517
EPI_ISL_5009515
EPI_ISL_5009513
EPI_ISL_5009511
EPI_ISL_5009447
EPI_ISL_5009445
EPI_ISL_5009443
EPI_ISL_3943282
EPI_ISL_3943244
EPI_ISL_3943245
EPI_ISL_3943251
EPI_ISL_3943256
EPI_ISL_3943266
EPI_ISL_3943268
EPI_ISL_3943271
EPI_ISL_3943275
EPI_ISL_3943278
EPI_ISL_3943293
EPI_ISL_5394001
EPI_ISL_2714358
EPI_ISL_9976215
EPI_ISL_8545575
EPI_ISL_9976888
EPI_ISL_7125842
EPI_ISL_7125843
EPI_ISL_9977100
EPI_ISL_5393858
EPI_ISL_5393857
EPI_ISL_5393856
EPI_ISL_5393853
EPI_ISL_5393863
EPI_ISL_5393869
EPI_ISL_5393868
EPI_ISL_5393867
EPI_ISL_5393866
EPI_ISL_5393865
EPI_ISL_5393864
EPI_ISL_5393874
EPI_ISL_5393873
EPI_ISL_5393872
EPI_ISL_5393870
EPI_ISL_5393879
EPI_ISL_5393878
EPI_ISL_5393876
EPI_ISL_5393875
EPI_ISL_5393885
EPI_ISL_5393884
EPI_ISL_5393883
EPI_ISL_5393882
EPI_ISL_5393881
EPI_ISL_5393887
EPI_ISL_5393896
EPI_ISL_5393895
EPI_ISL_5393894
EPI_ISL_5393892
EPI_ISL_5393838
EPI_ISL_5393837
EPI_ISL_5393836
EPI_ISL_5393835
EPI_ISL_5393833
EPI_ISL_5393832
EPI_ISL_5393841
EPI_ISL_5393849
EPI_ISL_5393847
EPI_ISL_5393844
EPI_ISL_5393852
EPI_ISL_5393850
EPI_ISL_7125839
EPI_ISL_5005997
EPI_ISL_7124509
EPI_ISL_7125850
EPI_ISL_7125853
EPI_ISL_7125857
EPI_ISL_7125847
EPI_ISL_9979440
EPI_ISL_3216512
EPI_ISL_3216509
EPI_ISL_3216508
EPI_ISL_3216506
EPI_ISL_3216504
EPI_ISL_3216494
EPI_ISL_3216490
EPI_ISL_3216486
EPI_ISL_3216472
EPI_ISL_3216471
EPI_ISL_3216468
EPI_ISL_3216460
EPI_ISL_3216459
EPI_ISL_3216458
EPI_ISL_3216452
EPI_ISL_3216439
EPI_ISL_3216436
EPI_ISL_3216435
EPI_ISL_3216434
EPI_ISL_3216428
EPI_ISL_3216420
EPI_ISL_3216418
EPI_ISL_5002868
EPI_ISL_5002320
EPI_ISL_9981606
EPI_ISL_9981611
EPI_ISL_9981632
EPI_ISL_7126395
EPI_ISL_9982113
EPI_ISL_9982187
EPI_ISL_9982315
EPI_ISL_9982323
EPI_ISL_9982324
EPI_ISL_9982325
EPI_ISL_15768917
EPI_ISL_9982350
EPI_ISL_9982352
EPI_ISL_9982351
EPI_ISL_9982390
EPI_ISL_9982394
EPI_ISL_9982409
EPI_ISL_9982410
EPI_ISL_9982408
EPI_ISL_9982411
EPI_ISL_9982474
EPI_ISL_9982769
EPI_ISL_3214268
EPI_ISL_3214260
EPI_ISL_4998723
EPI_ISL_4998721
EPI_ISL_1227395
EPI_ISL_3214222
EPI_ISL_9982962
EPI_ISL_4998466
EPI_ISL_2714469
EPI_ISL_4998315
EPI_ISL_9983050
EPI_ISL_4998186
EPI_ISL_4997882
EPI_ISL_3214089
EPI_ISL_7126359
EPI_ISL_7126358
EPI_ISL_7126360
EPI_ISL_7126361
EPI_ISL_7126364
EPI_ISL_7126363
EPI_ISL_7126365
EPI_ISL_7126368
EPI_ISL_7126369
EPI_ISL_4996861
EPI_ISL_5522293
EPI_ISL_7126372
EPI_ISL_7125044
EPI_ISL_4995824
EPI_ISL_4995704
EPI_ISL_7126381
EPI_ISL_7126383
EPI_ISL_4993657
EPI_ISL_4991775
EPI_ISL_4991746
EPI_ISL_7124661
EPI_ISL_13056998
EPI_ISL_7125993
EPI_ISL_7125994
EPI_ISL_853595
EPI_ISL_852909
EPI_ISL_3210147
EPI_ISL_1968579
EPI_ISL_6493642
EPI_ISL_7125950
EPI_ISL_6493438
EPI_ISL_7125948
EPI_ISL_7125976
EPI_ISL_4361982
EPI_ISL_8304976
EPI_ISL_7124715
EPI_ISL_4988251
EPI_ISL_9917776
EPI_ISL_8303976
EPI_ISL_9918076
EPI_ISL_9917676
EPI_ISL_6493551
EPI_ISL_6493553
EPI_ISL_6493554
EPI_ISL_6493557
EPI_ISL_8365176
EPI_ISL_4987187
EPI_ISL_7125152
EPI_ISL_4986838
EPI_ISL_7124379
EPI_ISL_6493698
EPI_ISL_6493702
EPI_ISL_7126100
EPI_ISL_9138076
EPI_ISL_9142876
EPI_ISL_8924376
EPI_ISL_4985294
EPI_ISL_9051860
EPI_ISL_9137876
EPI_ISL_8635276
EPI_ISL_7124362
EPI_ISL_8305876
EPI_ISL_8938076
EPI_ISL_7124303
EPI_ISL_9030476
EPI_ISL_8305976
EPI_ISL_8310776
EPI_ISL_9052086
EPI_ISL_9052100
EPI_ISL_8937976
EPI_ISL_7124310
EPI_ISL_10235776
EPI_ISL_10260776
EPI_ISL_4983051
EPI_ISL_18781049
EPI_ISL_18781042
EPI_ISL_18781077
EPI_ISL_10270476
EPI_ISL_18781097
EPI_ISL_4982045
EPI_ISL_18780927
EPI_ISL_18780982
EPI_ISL_18780877
EPI_ISL_18780854
EPI_ISL_18780846
EPI_ISL_18780902
EPI_ISL_4979861
EPI_ISL_9684576
EPI_ISL_2690595
EPI_ISL_9684076
EPI_ISL_18780776
EPI_ISL_9133676
EPI_ISL_8715776
EPI_ISL_4972484
EPI_ISL_4972432
EPI_ISL_4972406
EPI_ISL_4972391
EPI_ISL_5316609
EPI_ISL_1112695
EPI_ISL_4966152
EPI_ISL_4964975
EPI_ISL_4964971
EPI_ISL_4964380
EPI_ISL_4964072
EPI_ISL_4962942
EPI_ISL_18780649
EPI_ISL_18780645
EPI_ISL_18780729
EPI_ISL_18780689
EPI_ISL_18780672
EPI_ISL_18780670
EPI_ISL_4961852
EPI_ISL_18780568
EPI_ISL_18780569
EPI_ISL_18780559
EPI_ISL_5316612
EPI_ISL_4955376
EPI_ISL_18780451
EPI_ISL_7126110
EPI_ISL_7126112
EPI_ISL_3188562
EPI_ISL_3188561
EPI_ISL_3188558
EPI_ISL_3188555
EPI_ISL_7126114
EPI_ISL_3188541
EPI_ISL_3188530
EPI_ISL_3188519
EPI_ISL_3188495
EPI_ISL_3188492
EPI_ISL_3188489
EPI_ISL_3188488
EPI_ISL_3188470
EPI_ISL_3188464
EPI_ISL_3188462
EPI_ISL_3188458
EPI_ISL_3188436
EPI_ISL_3188411
EPI_ISL_3188409
EPI_ISL_3188405
EPI_ISL_3188404
EPI_ISL_3188366
EPI_ISL_3188349
EPI_ISL_3188347
EPI_ISL_3188344
EPI_ISL_3188334
EPI_ISL_3188332
EPI_ISL_3188316
EPI_ISL_3188313
EPI_ISL_3188305
EPI_ISL_3188302
EPI_ISL_3188294
EPI_ISL_3188285
EPI_ISL_3188284
EPI_ISL_3188281
EPI_ISL_3188280
EPI_ISL_3188278
EPI_ISL_3188265
EPI_ISL_3188263
EPI_ISL_7126122
EPI_ISL_7126121
EPI_ISL_4945242
EPI_ISL_4945237
EPI_ISL_4945232
EPI_ISL_4945230
EPI_ISL_4945227
EPI_ISL_4945222
EPI_ISL_4945221
EPI_ISL_4945220
EPI_ISL_4945218
EPI_ISL_4945216
EPI_ISL_4945213
EPI_ISL_4945200
EPI_ISL_4945194
EPI_ISL_4945192
EPI_ISL_4945190
EPI_ISL_4945185
EPI_ISL_4945182
EPI_ISL_4945180
EPI_ISL_4945175
EPI_ISL_4945173
EPI_ISL_4945172
EPI_ISL_4945167
EPI_ISL_4945162
EPI_ISL_4945160
EPI_ISL_4945159
EPI_ISL_4945150
EPI_ISL_4945147
EPI_ISL_4945141
EPI_ISL_4945140
EPI_ISL_4945139
EPI_ISL_4945138
EPI_ISL_4945136
EPI_ISL_4945131
EPI_ISL_4945130
EPI_ISL_4945128
EPI_ISL_4945121
EPI_ISL_4945118
EPI_ISL_4944911
EPI_ISL_4944910
EPI_ISL_4944909
EPI_ISL_4944908
EPI_ISL_4944907
EPI_ISL_4944906
EPI_ISL_4944905
EPI_ISL_4944904
EPI_ISL_4944903
EPI_ISL_4944900
EPI_ISL_4944896
EPI_ISL_18780351
EPI_ISL_4944895
EPI_ISL_4944894
EPI_ISL_4944892
EPI_ISL_4944891
EPI_ISL_4944887
EPI_ISL_4944881
EPI_ISL_4944880
EPI_ISL_4944878
EPI_ISL_4944875
EPI_ISL_4944874
EPI_ISL_4944872
EPI_ISL_4944871
EPI_ISL_4944869
EPI_ISL_4944868
EPI_ISL_4944863
EPI_ISL_4944859
EPI_ISL_18780149
EPI_ISL_9858577
EPI_ISL_18780163
EPI_ISL_18780160
EPI_ISL_18780157
EPI_ISL_18780159
EPI_ISL_18780312
EPI_ISL_18780151
EPI_ISL_18780340
EPI_ISL_15768596
EPI_ISL_3341467
EPI_ISL_18780293
EPI_ISL_9136577
EPI_ISL_9135877
EPI_ISL_8545477
EPI_ISL_9193277
EPI_ISL_2132626
EPI_ISL_18780092
EPI_ISL_18780091
EPI_ISL_18780125
EPI_ISL_18780082
EPI_ISL_18780116
EPI_ISL_18780119
EPI_ISL_18780075
EPI_ISL_18780072
EPI_ISL_18780074
EPI_ISL_18780073
EPI_ISL_18780143
EPI_ISL_18780134
EPI_ISL_18780098
EPI_ISL_18780095
EPI_ISL_18780045
EPI_ISL_18780041
EPI_ISL_7124493
EPI_ISL_18780037
EPI_ISL_18780107
EPI_ISL_18780069
EPI_ISL_18780053
EPI_ISL_18780067
EPI_ISL_18780059
EPI_ISL_18780056
EPI_ISL_9261577
EPI_ISL_8324177
EPI_ISL_8366377
EPI_ISL_4926513
EPI_ISL_4926512
EPI_ISL_4926511
EPI_ISL_4926502
EPI_ISL_4926500
EPI_ISL_4926499
EPI_ISL_4926492
EPI_ISL_4926490
EPI_ISL_4926480
EPI_ISL_4926477
EPI_ISL_4926455
EPI_ISL_4926452
EPI_ISL_4926448
EPI_ISL_4926442
EPI_ISL_4926441
EPI_ISL_9137877
EPI_ISL_9142877
EPI_ISL_8304677
EPI_ISL_8374377
EPI_ISL_9152277
EPI_ISL_5316510
EPI_ISL_4922874
EPI_ISL_4922873
EPI_ISL_8547977
EPI_ISL_961296
EPI_ISL_9084377
EPI_ISL_7126210
EPI_ISL_9142477
EPI_ISL_8545877
EPI_ISL_7126214
EPI_ISL_7126213
EPI_ISL_7126216
EPI_ISL_7872577
EPI_ISL_428761
EPI_ISL_8305277
EPI_ISL_8305777
EPI_ISL_8487077
EPI_ISL_8954177
EPI_ISL_7126226
EPI_ISL_9005077
EPI_ISL_4915382
EPI_ISL_4915260
EPI_ISL_853596
EPI_ISL_7125780
EPI_ISL_7125782
EPI_ISL_467896
EPI_ISL_9664096
EPI_ISL_8924477
EPI_ISL_9012977
EPI_ISL_8079477
EPI_ISL_9004177
EPI_ISL_10032108
EPI_ISL_18779934
EPI_ISL_18779936
EPI_ISL_18780029
EPI_ISL_18780020
EPI_ISL_18779958
EPI_ISL_18780017
EPI_ISL_18779945
EPI_ISL_18779982
EPI_ISL_18779974
EPI_ISL_18779973
EPI_ISL_4905090
EPI_ISL_2827319
EPI_ISL_18779961
EPI_ISL_18779987
EPI_ISL_18779969
EPI_ISL_18780030
EPI_ISL_18779996
EPI_ISL_18779908
EPI_ISL_18779907
EPI_ISL_857203
EPI_ISL_4901470
EPI_ISL_2140888
EPI_ISL_10131977
EPI_ISL_7272819
EPI_ISL_4889648
EPI_ISL_4889643
EPI_ISL_4889630
EPI_ISL_4889611
EPI_ISL_4889596
EPI_ISL_4886503
EPI_ISL_4886465
EPI_ISL_4886433
EPI_ISL_4886424
EPI_ISL_4886411
EPI_ISL_4886354
EPI_ISL_4886332
EPI_ISL_4886327
EPI_ISL_4886314
EPI_ISL_4886309
EPI_ISL_4886302
EPI_ISL_4886293
EPI_ISL_4886292
EPI_ISL_4886232
EPI_ISL_4886228
EPI_ISL_4886179
EPI_ISL_4886167
EPI_ISL_4886166
EPI_ISL_4886149
EPI_ISL_4886088
EPI_ISL_4886045
EPI_ISL_4885962
EPI_ISL_4885921
EPI_ISL_4885870
EPI_ISL_4885840
EPI_ISL_4885806
EPI_ISL_4885747
EPI_ISL_4885746
EPI_ISL_4885727
EPI_ISL_4885715
EPI_ISL_4885699
EPI_ISL_4885668
EPI_ISL_4885654
EPI_ISL_4885613
EPI_ISL_4885607
EPI_ISL_4885577
EPI_ISL_4885571
EPI_ISL_4885530
EPI_ISL_4885520
EPI_ISL_4885492
EPI_ISL_4885395
EPI_ISL_4882966
EPI_ISL_4882965
EPI_ISL_4882960
EPI_ISL_4882959
EPI_ISL_4882956
EPI_ISL_4882953
EPI_ISL_4882950
EPI_ISL_4882941
EPI_ISL_4882932
EPI_ISL_4882930
EPI_ISL_4882928
EPI_ISL_4882925
EPI_ISL_4882924
EPI_ISL_4882919
EPI_ISL_4882918
EPI_ISL_4882916
EPI_ISL_4882915
EPI_ISL_4882900
EPI_ISL_4882899
EPI_ISL_4882869
EPI_ISL_4882866
EPI_ISL_4882864
EPI_ISL_4882853
EPI_ISL_4882851
EPI_ISL_4882849
EPI_ISL_4882848
EPI_ISL_4882834
EPI_ISL_4882829
EPI_ISL_4882828
EPI_ISL_4882532
EPI_ISL_4882522
EPI_ISL_4882518
EPI_ISL_4882515
EPI_ISL_4882514
EPI_ISL_4882489
EPI_ISL_4882443
EPI_ISL_4882427
EPI_ISL_4882420
EPI_ISL_4882416
EPI_ISL_4882410
EPI_ISL_4882404
EPI_ISL_4882401
EPI_ISL_9685177
EPI_ISL_9660577
EPI_ISL_9341277
EPI_ISL_9710277
EPI_ISL_794196
EPI_ISL_18779893
EPI_ISL_937196
EPI_ISL_18779898
EPI_ISL_18779896
EPI_ISL_18779855
EPI_ISL_18779890
EPI_ISL_18779886
EPI_ISL_18779223
EPI_ISL_18779834
EPI_ISL_18779833
EPI_ISL_18779839
EPI_ISL_18779838
EPI_ISL_18779861
EPI_ISL_18779851
EPI_ISL_15180363
EPI_ISL_18779844
EPI_ISL_18779848
EPI_ISL_18779883
EPI_ISL_18779875
EPI_ISL_2715457
EPI_ISL_18779864
EPI_ISL_18779863
EPI_ISL_7126277
EPI_ISL_3319104
EPI_ISL_7126286
EPI_ISL_7126289
EPI_ISL_2715515
EPI_ISL_7126293
EPI_ISL_4850536
EPI_ISL_4850535
EPI_ISL_4850524
EPI_ISL_4850521
EPI_ISL_4850515
EPI_ISL_4850514
EPI_ISL_4850512
EPI_ISL_4850511
EPI_ISL_4850510
EPI_ISL_4850503
EPI_ISL_4850502
EPI_ISL_4850501
EPI_ISL_4850500
EPI_ISL_4850477
EPI_ISL_4850475
EPI_ISL_4850474
EPI_ISL_10043202
EPI_ISL_4850469
EPI_ISL_4850467
EPI_ISL_4850465
EPI_ISL_4850464
EPI_ISL_4850460
EPI_ISL_4850458
EPI_ISL_4850454
EPI_ISL_4850450
EPI_ISL_4850438
EPI_ISL_4850435
EPI_ISL_4850432
EPI_ISL_4850430
EPI_ISL_4850427
EPI_ISL_4850420
EPI_ISL_4850409
EPI_ISL_4850400
EPI_ISL_4850396
EPI_ISL_4850390
EPI_ISL_4850387
EPI_ISL_4850381
EPI_ISL_4850379
EPI_ISL_4850364
EPI_ISL_4850363
EPI_ISL_4850362
EPI_ISL_4850361
EPI_ISL_4850359
EPI_ISL_4850353
EPI_ISL_4850349
EPI_ISL_4850347
EPI_ISL_4850343
EPI_ISL_4850338
EPI_ISL_4850337
EPI_ISL_4850335
EPI_ISL_4850331
EPI_ISL_4850327
EPI_ISL_4850322
EPI_ISL_4850320
EPI_ISL_4850319
EPI_ISL_4850317
EPI_ISL_4850316
EPI_ISL_4850311
EPI_ISL_4850296
EPI_ISL_4850290
EPI_ISL_4850284
EPI_ISL_4850283
EPI_ISL_4850282
EPI_ISL_4850281
EPI_ISL_4850280
EPI_ISL_4850279
EPI_ISL_4850275
EPI_ISL_4850274
EPI_ISL_4850269
EPI_ISL_4850266
EPI_ISL_4850263
EPI_ISL_4850260
EPI_ISL_4850256
EPI_ISL_4850251
EPI_ISL_4850249
EPI_ISL_4850243
EPI_ISL_7126237
EPI_ISL_4850235
EPI_ISL_4850226
EPI_ISL_4850219
EPI_ISL_4850218
EPI_ISL_4850217
EPI_ISL_4850212
EPI_ISL_4850210
EPI_ISL_4850205
EPI_ISL_4850204
EPI_ISL_4850202
EPI_ISL_4850201
EPI_ISL_4850197
EPI_ISL_4850194
EPI_ISL_4850191
EPI_ISL_4850189
EPI_ISL_4850183
EPI_ISL_4850178
EPI_ISL_4850171
EPI_ISL_4850166
EPI_ISL_4850165
EPI_ISL_4850164
EPI_ISL_4850163
EPI_ISL_4850161
EPI_ISL_4850160
EPI_ISL_4850152
EPI_ISL_4850149
EPI_ISL_4850147
EPI_ISL_4850146
EPI_ISL_4850141
EPI_ISL_4850134
EPI_ISL_4850133
EPI_ISL_4850132
EPI_ISL_4850130
EPI_ISL_7126247
EPI_ISL_4850126
EPI_ISL_4850125
EPI_ISL_4850123
EPI_ISL_4850118
EPI_ISL_4850114
EPI_ISL_4850105
EPI_ISL_4850101
EPI_ISL_4850099
EPI_ISL_4850098
EPI_ISL_4850096
EPI_ISL_4850095
EPI_ISL_4850091
EPI_ISL_4850080
EPI_ISL_4850079
EPI_ISL_4850077
EPI_ISL_4850076
EPI_ISL_4850075
EPI_ISL_4850055
EPI_ISL_4850053
EPI_ISL_4850049
EPI_ISL_4850047
EPI_ISL_4850046
EPI_ISL_4850043
EPI_ISL_4850042
EPI_ISL_4850038
EPI_ISL_4850036
EPI_ISL_4850035
EPI_ISL_4850033
EPI_ISL_4850032
EPI_ISL_4850031
EPI_ISL_4850030
EPI_ISL_4850027
EPI_ISL_4850025
EPI_ISL_4850022
EPI_ISL_4850020
EPI_ISL_4850018
EPI_ISL_4850014
EPI_ISL_4850012
EPI_ISL_4850006
EPI_ISL_4850005
EPI_ISL_4850000
EPI_ISL_4849998
EPI_ISL_4849992
EPI_ISL_4849987
EPI_ISL_4849986
EPI_ISL_4849983
EPI_ISL_4849981
EPI_ISL_4849980
EPI_ISL_4849978
EPI_ISL_7126257
EPI_ISL_4849972
EPI_ISL_4849970
EPI_ISL_4849965
EPI_ISL_4849962
EPI_ISL_7126265
EPI_ISL_7126264
EPI_ISL_10043502
EPI_ISL_4847131
EPI_ISL_4847125
EPI_ISL_4847122
EPI_ISL_4847112
EPI_ISL_4847109
EPI_ISL_4847102
EPI_ISL_4847099
EPI_ISL_10043609
EPI_ISL_13836613
EPI_ISL_10043659
EPI_ISL_10043674
EPI_ISL_10043731
EPI_ISL_10043738
EPI_ISL_2715614
EPI_ISL_13835458
EPI_ISL_10044112
EPI_ISL_10044147
EPI_ISL_10044167
EPI_ISL_10044171
EPI_ISL_10044204
EPI_ISL_10044205
EPI_ISL_7124279
EPI_ISL_5409818
EPI_ISL_5409819
EPI_ISL_2634061
EPI_ISL_5409811
EPI_ISL_5409812
EPI_ISL_5409813
EPI_ISL_5409815
EPI_ISL_2139448
EPI_ISL_2139477
EPI_ISL_2715677
EPI_ISL_5409820
EPI_ISL_5409821
EPI_ISL_5409822
EPI_ISL_5409824
EPI_ISL_5409827
EPI_ISL_4826980
EPI_ISL_4826917
EPI_ISL_4826903
EPI_ISL_4826881
EPI_ISL_7124230
EPI_ISL_18779778
EPI_ISL_18779771
EPI_ISL_18779772
EPI_ISL_1394596
EPI_ISL_18779782
EPI_ISL_18779781
EPI_ISL_18779803
EPI_ISL_18779769
EPI_ISL_18779800
EPI_ISL_18779804
EPI_ISL_18779796
EPI_ISL_18779821
EPI_ISL_18779794
EPI_ISL_18779824
EPI_ISL_18779768
EPI_ISL_18779666
EPI_ISL_5409804
EPI_ISL_5409805
EPI_ISL_18779594
EPI_ISL_18779543
EPI_ISL_18779552
EPI_ISL_18779586
EPI_ISL_18779588
EPI_ISL_18779566
EPI_ISL_3153178
EPI_ISL_18779337
EPI_ISL_2229542
EPI_ISL_18779332
EPI_ISL_18779328
EPI_ISL_18779360
EPI_ISL_2827596
EPI_ISL_4818961
EPI_ISL_2715756
EPI_ISL_4818732
EPI_ISL_4818729
EPI_ISL_4818713
EPI_ISL_4818634
EPI_ISL_4818616
EPI_ISL_4818541
EPI_ISL_2715770
EPI_ISL_18779196
EPI_ISL_18779295
EPI_ISL_18779172
EPI_ISL_18779224
EPI_ISL_18779212
EPI_ISL_18779112
EPI_ISL_18779104
EPI_ISL_2716237
EPI_ISL_5409850
EPI_ISL_4816276
EPI_ISL_5409830
EPI_ISL_4816043
EPI_ISL_5409834
EPI_ISL_4815959
EPI_ISL_5409835
EPI_ISL_5409836
EPI_ISL_5409837
EPI_ISL_5409838
EPI_ISL_5409840
EPI_ISL_5409841
EPI_ISL_5409842
EPI_ISL_5409843
EPI_ISL_5409847
EPI_ISL_5409849
EPI_ISL_10073962
EPI_ISL_9142978
EPI_ISL_10074150
EPI_ISL_10074153
EPI_ISL_10074147
EPI_ISL_10074149
EPI_ISL_9142478
EPI_ISL_9133655
EPI_ISL_9013578
EPI_ISL_8715678
EPI_ISL_10074905
EPI_ISL_8718878
EPI_ISL_10074992
EPI_ISL_8636878
EPI_ISL_10075521
EPI_ISL_10075534
EPI_ISL_10075540
EPI_ISL_10075548
EPI_ISL_10075546
EPI_ISL_10075572
EPI_ISL_5409789
EPI_ISL_10075849
EPI_ISL_8842378
EPI_ISL_3148989
EPI_ISL_3148966
EPI_ISL_3148953
EPI_ISL_3148945
EPI_ISL_5409790
EPI_ISL_5409792
EPI_ISL_5409794
EPI_ISL_5409793
EPI_ISL_5409798
EPI_ISL_7272920
EPI_ISL_7273320
EPI_ISL_10076327
EPI_ISL_10076322
EPI_ISL_10076350
EPI_ISL_10076354
EPI_ISL_10076362
EPI_ISL_10076361
EPI_ISL_10076388
EPI_ISL_8924278
EPI_ISL_10076604
EPI_ISL_10076610
EPI_ISL_10076611
EPI_ISL_10076644
EPI_ISL_10076647
EPI_ISL_10076685
EPI_ISL_10076687
EPI_ISL_10076686
EPI_ISL_10076688
EPI_ISL_10076701
EPI_ISL_10076716
EPI_ISL_10076708
EPI_ISL_10076719
EPI_ISL_10076721
EPI_ISL_10076727
EPI_ISL_10076825
EPI_ISL_10076979
EPI_ISL_10076966
EPI_ISL_9005578
EPI_ISL_10077263
EPI_ISL_10077264
EPI_ISL_8318378
EPI_ISL_10077310
EPI_ISL_10077320
EPI_ISL_10077317
EPI_ISL_10077329
EPI_ISL_10077330
EPI_ISL_10077336
EPI_ISL_8079555
EPI_ISL_7126074
EPI_ISL_7126085
EPI_ISL_7126087
EPI_ISL_7126090
EPI_ISL_7126091
EPI_ISL_7126094
EPI_ISL_4807105
EPI_ISL_7126035
EPI_ISL_4807030
EPI_ISL_4806998
EPI_ISL_4806985
EPI_ISL_4806978
EPI_ISL_4806972
EPI_ISL_4806971
EPI_ISL_4806970
EPI_ISL_4806968
EPI_ISL_4806965
EPI_ISL_4806953
EPI_ISL_4806942
EPI_ISL_4806927
EPI_ISL_4806904
EPI_ISL_4806840
EPI_ISL_4806830
EPI_ISL_4806651
EPI_ISL_8182978
EPI_ISL_9341378
EPI_ISL_8550778
EPI_ISL_7126041
EPI_ISL_7126040
EPI_ISL_7126042
EPI_ISL_9348278
EPI_ISL_9349878
EPI_ISL_9350478
EPI_ISL_9350778
EPI_ISL_8324178
EPI_ISL_8359878
EPI_ISL_9390678
EPI_ISL_5604830
EPI_ISL_7125240
EPI_ISL_9526978
EPI_ISL_7124764
EPI_ISL_10208578
EPI_ISL_1740036
EPI_ISL_9658678
EPI_ISL_10132078
EPI_ISL_10270478
EPI_ISL_1965967
EPI_ISL_5409825
EPI_ISL_5409803
EPI_ISL_10114011
EPI_ISL_1965892
EPI_ISL_10114121
EPI_ISL_10114378
EPI_ISL_861127
EPI_ISL_7118236
EPI_ISL_10114805
EPI_ISL_3134540
EPI_ISL_2633597
EPI_ISL_7128987
EPI_ISL_7128933
EPI_ISL_7128954
EPI_ISL_7128962
EPI_ISL_7128966
EPI_ISL_7128969
EPI_ISL_7128904
EPI_ISL_7128921
EPI_ISL_7128925
EPI_ISL_7125835
EPI_ISL_7276221
EPI_ISL_7129468
EPI_ISL_7129465
EPI_ISL_7129466
EPI_ISL_7129460
EPI_ISL_7129472
EPI_ISL_7129486
EPI_ISL_7129483
EPI_ISL_7129484
EPI_ISL_7129489
EPI_ISL_7129488
EPI_ISL_7129494
EPI_ISL_7129495
EPI_ISL_7129492
EPI_ISL_7129493
EPI_ISL_7129490
EPI_ISL_7129424
EPI_ISL_7129421
EPI_ISL_7129422
EPI_ISL_7129428
EPI_ISL_7129426
EPI_ISL_7129429
EPI_ISL_4761378
EPI_ISL_4761376
EPI_ISL_4761375
EPI_ISL_4761374
EPI_ISL_4761373
EPI_ISL_4761372
[truncated: 539,650+ more rows]

## Sheet: B.1.1.7
GISAID
EPI_ISL_2662840
EPI_ISL_2662905
EPI_ISL_2662949
EPI_ISL_2662951
EPI_ISL_2662985
EPI_ISL_2662977
EPI_ISL_2662981
EPI_ISL_2229669
EPI_ISL_2229631
EPI_ISL_2229632
EPI_ISL_2229634
EPI_ISL_2229618
EPI_ISL_2229617
EPI_ISL_2229620
EPI_ISL_2229622
EPI_ISL_2229627
EPI_ISL_2229608
EPI_ISL_2229609
EPI_ISL_2229600
EPI_ISL_2229601
EPI_ISL_2229603
EPI_ISL_2229690
EPI_ISL_2229697
EPI_ISL_2229699
EPI_ISL_2229675
EPI_ISL_2229677
EPI_ISL_2229679
EPI_ISL_2229689
EPI_ISL_2229751
EPI_ISL_2229759
EPI_ISL_2229760
EPI_ISL_2229764
EPI_ISL_2229732
EPI_ISL_2229733
EPI_ISL_2229734
EPI_ISL_2229735
EPI_ISL_2229737
EPI_ISL_2229740
EPI_ISL_2229747
EPI_ISL_2229719
EPI_ISL_2229712
EPI_ISL_2229713
EPI_ISL_2229720
EPI_ISL_2229721
EPI_ISL_2229725
EPI_ISL_2229708
EPI_ISL_2229709
EPI_ISL_2229592
EPI_ISL_2229575
EPI_ISL_2229576
EPI_ISL_2229581
EPI_ISL_2229582
EPI_ISL_2229584
EPI_ISL_2229585
EPI_ISL_2229587
EPI_ISL_2229616
EPI_ISL_2229752
EPI_ISL_2229762
EPI_ISL_2229763
EPI_ISL_2229739
EPI_ISL_4174478
EPI_ISL_4174480
EPI_ISL_2662980
EPI_ISL_2662984
EPI_ISL_2662986
EPI_ISL_2662987
EPI_ISL_2662989
EPI_ISL_2662990
EPI_ISL_2662992
EPI_ISL_2662993
EPI_ISL_2662994
EPI_ISL_2662961
EPI_ISL_2662965
EPI_ISL_2662968
EPI_ISL_2662969
EPI_ISL_2662971
EPI_ISL_2662972
EPI_ISL_2662974
EPI_ISL_2662978
EPI_ISL_2662979
EPI_ISL_2662831
EPI_ISL_2662832
EPI_ISL_2662833
EPI_ISL_2662834
EPI_ISL_2662835
EPI_ISL_2662836
EPI_ISL_2662837
EPI_ISL_2662838
EPI_ISL_2662828
EPI_ISL_2662829
EPI_ISL_2662880
EPI_ISL_2662881
EPI_ISL_2662882
EPI_ISL_2662885
EPI_ISL_2662887
EPI_ISL_2662888
EPI_ISL_2662889
EPI_ISL_2662890
EPI_ISL_2662891
EPI_ISL_2662892
EPI_ISL_2662894
EPI_ISL_2662895
EPI_ISL_2662896
EPI_ISL_2662898
EPI_ISL_2662899
EPI_ISL_2662860
EPI_ISL_2662861
EPI_ISL_2662864
EPI_ISL_2662865
EPI_ISL_2662866
EPI_ISL_2662867
EPI_ISL_2662868
EPI_ISL_2662869
EPI_ISL_2662870
EPI_ISL_2662871
EPI_ISL_2662872
EPI_ISL_2662873
EPI_ISL_2662874
EPI_ISL_2662875
EPI_ISL_2662877
EPI_ISL_2662878
EPI_ISL_2662879
EPI_ISL_2662843
EPI_ISL_2662844
EPI_ISL_2662845
EPI_ISL_2662847
EPI_ISL_2662848
EPI_ISL_2662849
EPI_ISL_2662850
EPI_ISL_2662852
EPI_ISL_2662853
EPI_ISL_2662854
EPI_ISL_2662858
EPI_ISL_2662859
EPI_ISL_2662940
EPI_ISL_2662941
EPI_ISL_2662946
EPI_ISL_2662948
EPI_ISL_2662938
EPI_ISL_2662952
EPI_ISL_2662953
EPI_ISL_2662956
EPI_ISL_2662958
EPI_ISL_2662920
EPI_ISL_2662921
EPI_ISL_2662922
EPI_ISL_2662916
EPI_ISL_2662917
EPI_ISL_2662918
EPI_ISL_2662919
EPI_ISL_2662933
EPI_ISL_2662935
EPI_ISL_2662936
EPI_ISL_2662927
EPI_ISL_2662900
EPI_ISL_2662901
EPI_ISL_2662904
EPI_ISL_2662907
EPI_ISL_2662908
EPI_ISL_2662909
EPI_ISL_4174482
EPI_ISL_4174484
EPI_ISL_2662934
EPI_ISL_2662851
EPI_ISL_2662876
EPI_ISL_2662893
EPI_ISL_2662897
EPI_ISL_2662942
EPI_ISL_2662943
EPI_ISL_2662957
EPI_ISL_2662966
EPI_ISL_2662983
EPI_ISL_2662988
EPI_ISL_2662914
EPI_ISL_2229589
EPI_ISL_2229604
EPI_ISL_2662947
EPI_ISL_2662959
EPI_ISL_2662846
EPI_ISL_2662886
EPI_ISL_2662924
EPI_ISL_2662991
EPI_ISL_2662906
EPI_ISL_2662967
EPI_ISL_2229745
EPI_ISL_2229755
EPI_ISL_2229758
EPI_ISL_2229633
EPI_ISL_2229619
EPI_ISL_2229611
EPI_ISL_2229612
EPI_ISL_2229741
EPI_ISL_2229613
EPI_ISL_2229746
EPI_ISL_2229628
EPI_ISL_2229607
EPI_ISL_2229715
EPI_ISL_2229591
EPI_ISL_2229629
EPI_ISL_2229630
EPI_ISL_2229602
EPI_ISL_2229727
EPI_ISL_2229701
EPI_ISL_2229588
EPI_ISL_2662982

## Sheet: BA.2.12.1
GISAID
EPI_ISL_12307771
EPI_ISL_13431170
EPI_ISL_11993065
EPI_ISL_12307735
EPI_ISL_12641625
EPI_ISL_12641630
EPI_ISL_12844852
EPI_ISL_12109771
EPI_ISL_13948325
EPI_ISL_13948355
EPI_ISL_12432889
EPI_ISL_14487110
EPI_ISL_14464769
EPI_ISL_13949054
EPI_ISL_13863035
EPI_ISL_13057078
EPI_ISL_13491624
EPI_ISL_13701484
EPI_ISL_13430501
EPI_ISL_12476653
EPI_ISL_12476654
EPI_ISL_12476956
EPI_ISL_12476652
EPI_ISL_13429979
EPI_ISL_12476961
EPI_ISL_12641618
EPI_ISL_13686597
EPI_ISL_13948592
EPI_ISL_13057027
EPI_ISL_13863009
EPI_ISL_13701466
EPI_ISL_14464749
EPI_ISL_13430032
EPI_ISL_13701539
EPI_ISL_13463336
EPI_ISL_12134863
EPI_ISL_12432908
EPI_ISL_12844855
EPI_ISL_13144917
EPI_ISL_13948553
EPI_ISL_11993023
EPI_ISL_13430033
EPI_ISL_12476929
EPI_ISL_12476951
EPI_ISL_12476911
EPI_ISL_13430037
EPI_ISL_11760203
EPI_ISL_12307736
EPI_ISL_13430038
EPI_ISL_13144874
EPI_ISL_13429985
EPI_ISL_13430483
EPI_ISL_15335707
EPI_ISL_13055024
EPI_ISL_12476637
EPI_ISL_13055080
EPI_ISL_11993024
EPI_ISL_12873761
EPI_ISL_11532818
EPI_ISL_12873754
EPI_ISL_13429986
EPI_ISL_12307766
EPI_ISL_12805153
EPI_ISL_12641641
EPI_ISL_12805150
EPI_ISL_11760185
EPI_ISL_12476660
EPI_ISL_12873802
EPI_ISL_13431169
EPI_ISL_12307746
EPI_ISL_13948504
EPI_ISL_12805152
EPI_ISL_12307774
EPI_ISL_12873803
EPI_ISL_13430499
EPI_ISL_13431172
EPI_ISL_11760175
EPI_ISL_13948982
EPI_ISL_12476671
EPI_ISL_13055083
EPI_ISL_11760174
EPI_ISL_11760209
EPI_ISL_11993068
EPI_ISL_11760206
EPI_ISL_13948759
EPI_ISL_14464650
EPI_ISL_12134831
EPI_ISL_12239941
EPI_ISL_11993083
EPI_ISL_13055020
EPI_ISL_13431173
EPI_ISL_12476976
EPI_ISL_14464598
EPI_ISL_13057007
EPI_ISL_13056959
EPI_ISL_13948936
EPI_ISL_13948860
EPI_ISL_13430095
EPI_ISL_13144872
EPI_ISL_13430094
EPI_ISL_13430488
EPI_ISL_13144906
EPI_ISL_12573778
EPI_ISL_13057067
EPI_ISL_12239951
EPI_ISL_12432895
EPI_ISL_13351508
EPI_ISL_13351389
EPI_ISL_14010421
EPI_ISL_12432898
EPI_ISL_14010461
EPI_ISL_13463300
EPI_ISL_13863106
EPI_ISL_12573821
EPI_ISL_14010430
EPI_ISL_12844826
EPI_ISL_12432888
EPI_ISL_13057115
EPI_ISL_12641624
EPI_ISL_12476983
EPI_ISL_12307753
EPI_ISL_11993071
EPI_ISL_11993026
EPI_ISL_11993027
EPI_ISL_11993070
EPI_ISL_11760191
EPI_ISL_11760212
EPI_ISL_14486960
EPI_ISL_12844927
EPI_ISL_14486976
EPI_ISL_12432847
EPI_ISL_13463347
EPI_ISL_13701555
EPI_ISL_14464731
EPI_ISL_13956809
EPI_ISL_12873762
EPI_ISL_13701495
EPI_ISL_13894421
EPI_ISL_13351512
EPI_ISL_12844813
EPI_ISL_13057040
EPI_ISL_12134853
EPI_ISL_14487033
EPI_ISL_14486951
EPI_ISL_13894428
EPI_ISL_14486971
EPI_ISL_14487085
EPI_ISL_14487015
EPI_ISL_14487024
EPI_ISL_14487124
EPI_ISL_14486980
EPI_ISL_14487055
EPI_ISL_13057119
EPI_ISL_13863129
EPI_ISL_13863164
EPI_ISL_14487022
EPI_ISL_14486991
EPI_ISL_14487037
EPI_ISL_14487048
EPI_ISL_14486969
EPI_ISL_14487046
EPI_ISL_14487038
EPI_ISL_14725275
EPI_ISL_14725276
EPI_ISL_14487039
EPI_ISL_14487018
EPI_ISL_14487126
EPI_ISL_14487061
EPI_ISL_14486953
EPI_ISL_13863018
EPI_ISL_15336312
EPI_ISL_13686614
EPI_ISL_13463345
EPI_ISL_12476651
EPI_ISL_14487034
EPI_ISL_14487035
EPI_ISL_13686555
EPI_ISL_12652248
EPI_ISL_13686676
EPI_ISL_14464853
EPI_ISL_13686489
EPI_ISL_13686482
EPI_ISL_13686487
EPI_ISL_13686492
EPI_ISL_13686179
EPI_ISL_13686261
EPI_ISL_13686135
EPI_ISL_13686484
EPI_ISL_13948640
EPI_ISL_13686397
EPI_ISL_13686282
EPI_ISL_12476923
EPI_ISL_12476924
EPI_ISL_13491617
EPI_ISL_13701552
EPI_ISL_12476906
EPI_ISL_12476910
EPI_ISL_13701477
EPI_ISL_12476950
EPI_ISL_12476927
EPI_ISL_14437934
EPI_ISL_14987769
EPI_ISL_13430034
EPI_ISL_13351400
EPI_ISL_13463342
EPI_ISL_14437687
EPI_ISL_13057073
EPI_ISL_13351518
EPI_ISL_13863112
EPI_ISL_12652219
EPI_ISL_13686159
EPI_ISL_13948905
EPI_ISL_13686299
EPI_ISL_14464721
EPI_ISL_14062375
EPI_ISL_13686319
EPI_ISL_13686416
EPI_ISL_13430489
EPI_ISL_13829280
EPI_ISL_13144912
EPI_ISL_13948761
EPI_ISL_13686245
EPI_ISL_13948871
EPI_ISL_14010480
EPI_ISL_13829292
EPI_ISL_13057194
EPI_ISL_12134858
EPI_ISL_12844934
EPI_ISL_12134848
EPI_ISL_12134903
EPI_ISL_13056979
EPI_ISL_13057095
EPI_ISL_13057108
EPI_ISL_13686274
EPI_ISL_13686273
EPI_ISL_13948820
EPI_ISL_12652274
EPI_ISL_13686465
EPI_ISL_13686369
EPI_ISL_14464679
EPI_ISL_13686528
EPI_ISL_12134855
EPI_ISL_12134876
EPI_ISL_13948501
EPI_ISL_12652462
EPI_ISL_14464737
EPI_ISL_12652313
EPI_ISL_13686156
EPI_ISL_13686565
EPI_ISL_12805091
EPI_ISL_13948691
EPI_ISL_13686249
EPI_ISL_12476670
EPI_ISL_13144865
EPI_ISL_13948799
EPI_ISL_13863011
EPI_ISL_14487013
EPI_ISL_14464662
EPI_ISL_15272684
EPI_ISL_14464612
EPI_ISL_14464615
EPI_ISL_13948602
EPI_ISL_13463292
EPI_ISL_13948659
EPI_ISL_13701520
EPI_ISL_13430031
EPI_ISL_13948895
EPI_ISL_13686457
EPI_ISL_13686361
EPI_ISL_13057082
EPI_ISL_13948564
EPI_ISL_13948524
EPI_ISL_13948621
EPI_ISL_13948562
EPI_ISL_12652310
EPI_ISL_12652446
EPI_ISL_12652552
EPI_ISL_12652264
EPI_ISL_13686306
EPI_ISL_13686403
EPI_ISL_13686467
EPI_ISL_13686371
EPI_ISL_12652246
EPI_ISL_13056962
EPI_ISL_13948651
EPI_ISL_13686165
EPI_ISL_13948350
EPI_ISL_13948594
EPI_ISL_13948806
EPI_ISL_13948304
EPI_ISL_14464581
EPI_ISL_13686325
EPI_ISL_13686422
EPI_ISL_12652179
EPI_ISL_15336309
EPI_ISL_14464675
EPI_ISL_14464660
EPI_ISL_13463369
EPI_ISL_12844918
EPI_ISL_12652271
EPI_ISL_12432845
EPI_ISL_12432915
EPI_ISL_13948478
EPI_ISL_13948711
EPI_ISL_14464633
EPI_ISL_13948582
EPI_ISL_13948568
EPI_ISL_13948915
EPI_ISL_14464570
EPI_ISL_13948493
EPI_ISL_13863187
EPI_ISL_13863188
EPI_ISL_14444894
EPI_ISL_14010416
EPI_ISL_14464703
EPI_ISL_13948840
EPI_ISL_13351401
EPI_ISL_13463315
EPI_ISL_12897010
EPI_ISL_15336281
EPI_ISL_11760216
EPI_ISL_13686276
EPI_ISL_13948469
EPI_ISL_13686589
EPI_ISL_13056977
EPI_ISL_13949111
EPI_ISL_14056969
EPI_ISL_12573763
EPI_ISL_12844814
EPI_ISL_12844853
EPI_ISL_12573797
EPI_ISL_13829288
EPI_ISL_13430464
EPI_ISL_11993063
EPI_ISL_12109774
EPI_ISL_12476650
EPI_ISL_11760202
EPI_ISL_12476648
EPI_ISL_13058980
EPI_ISL_12476645
EPI_ISL_12476649
EPI_ISL_12652147
EPI_ISL_13686362
EPI_ISL_12652174
EPI_ISL_12652154
EPI_ISL_14464573
EPI_ISL_13686434
EPI_ISL_12652517
EPI_ISL_13686402
EPI_ISL_13686305
EPI_ISL_12652362
EPI_ISL_13686627
EPI_ISL_13686425
EPI_ISL_13686569
EPI_ISL_14464758
EPI_ISL_13686386
EPI_ISL_12652277
EPI_ISL_12652140
EPI_ISL_12652342
EPI_ISL_13686658
EPI_ISL_13686535
EPI_ISL_13948995
EPI_ISL_14464728
EPI_ISL_13948890
EPI_ISL_13948878
EPI_ISL_13948834
EPI_ISL_13686150
EPI_ISL_13686171
EPI_ISL_14464646
EPI_ISL_13686391
EPI_ISL_12652143
EPI_ISL_12652288
EPI_ISL_12652308
EPI_ISL_12652267
EPI_ISL_12652417
EPI_ISL_13686408
EPI_ISL_13686311
EPI_ISL_13948322
EPI_ISL_13686247
EPI_ISL_13949031
EPI_ISL_12652273
EPI_ISL_12652316
EPI_ISL_12652399
EPI_ISL_13948613
EPI_ISL_12652281
EPI_ISL_12652259
EPI_ISL_12652348
EPI_ISL_13948712
EPI_ISL_12652400
EPI_ISL_13686398
EPI_ISL_13948710
EPI_ISL_13686657
EPI_ISL_13948280
EPI_ISL_13948897
EPI_ISL_13056963
EPI_ISL_13948675
EPI_ISL_13701538
EPI_ISL_13686476
EPI_ISL_13686380
EPI_ISL_13948695
EPI_ISL_13949023
EPI_ISL_12573691
EPI_ISL_13351524
EPI_ISL_13351497
EPI_ISL_13351500
EPI_ISL_12134835
EPI_ISL_12134870
EPI_ISL_12432838
EPI_ISL_12239958
EPI_ISL_12134859
EPI_ISL_12239969
EPI_ISL_13057114
EPI_ISL_11685994
EPI_ISL_12239972
EPI_ISL_13351460
EPI_ISL_13351459
EPI_ISL_11685995
EPI_ISL_12134820
EPI_ISL_13863078
EPI_ISL_12239905
EPI_ISL_12573871
EPI_ISL_12573710
EPI_ISL_12844817
EPI_ISL_12844819
EPI_ISL_12573718
EPI_ISL_12844868
EPI_ISL_13144915
EPI_ISL_12844830
EPI_ISL_13686169
EPI_ISL_13948680
EPI_ISL_13948278
EPI_ISL_12844790
EPI_ISL_13686600
EPI_ISL_14056985
EPI_ISL_13686352
EPI_ISL_13686448
EPI_ISL_14464664
EPI_ISL_13949003
EPI_ISL_13686450
EPI_ISL_13686409
EPI_ISL_13948339
EPI_ISL_13863171
EPI_ISL_14010481
EPI_ISL_13686635
EPI_ISL_11993074
EPI_ISL_12109778
EPI_ISL_13948914
EPI_ISL_13686631
EPI_ISL_11295125
EPI_ISL_12239947
EPI_ISL_12134838
EPI_ISL_14464666
EPI_ISL_11532817
EPI_ISL_12476658
EPI_ISL_11993075
EPI_ISL_13430029
EPI_ISL_13056970
EPI_ISL_13055015
EPI_ISL_11760181
EPI_ISL_12307762
EPI_ISL_11760177
EPI_ISL_13429978
EPI_ISL_11760187
EPI_ISL_11760182
EPI_ISL_11993072
EPI_ISL_13701496
EPI_ISL_11760193
EPI_ISL_12844882
EPI_ISL_12844885
EPI_ISL_13057133
EPI_ISL_13948636
EPI_ISL_13948823
EPI_ISL_13948796
EPI_ISL_12652224
EPI_ISL_13948785
EPI_ISL_13948788
EPI_ISL_12652290
EPI_ISL_13055331
EPI_ISL_13948300
EPI_ISL_12652358
EPI_ISL_12652558
EPI_ISL_12652150
EPI_ISL_12652335
EPI_ISL_12652389
EPI_ISL_14464723
EPI_ISL_12652421
EPI_ISL_12652370
EPI_ISL_13948844
EPI_ISL_13948741
EPI_ISL_13686634
EPI_ISL_13948533
EPI_ISL_13948629
EPI_ISL_13948308
EPI_ISL_14464637
EPI_ISL_14464707
EPI_ISL_12652262
EPI_ISL_12652319
EPI_ISL_13948737
EPI_ISL_13948779
EPI_ISL_12652472
EPI_ISL_12652459
EPI_ISL_13949114
EPI_ISL_13949053
EPI_ISL_13949108
EPI_ISL_12652385
EPI_ISL_13686670
EPI_ISL_13948817
NA
EPI_ISL_12652589
EPI_ISL_12652176
EPI_ISL_13948476
EPI_ISL_13948706
EPI_ISL_13948792
EPI_ISL_13948642
EPI_ISL_13948608
EPI_ISL_13686468
EPI_ISL_13686372
EPI_ISL_12652222
EPI_ISL_13948874
EPI_ISL_13948698
EPI_ISL_13686511
EPI_ISL_13948756
EPI_ISL_13948281
EPI_ISL_13948975
EPI_ISL_12652155
EPI_ISL_13686350
EPI_ISL_13686446
EPI_ISL_13948354
EPI_ISL_13948783
EPI_ISL_13686566
EPI_ISL_13948466
EPI_ISL_14464631
EPI_ISL_13948623
EPI_ISL_12652229
EPI_ISL_13686288
EPI_ISL_13686533
EPI_ISL_13686385
EPI_ISL_12652338
EPI_ISL_13948547
EPI_ISL_13948989
EPI_ISL_13948798
EPI_ISL_13686572
EPI_ISL_14464739
EPI_ISL_13948733
EPI_ISL_13948826
EPI_ISL_12652414
EPI_ISL_13948732
EPI_ISL_13948760
EPI_ISL_13686436
EPI_ISL_13686674
EPI_ISL_14464596
EPI_ISL_14464639
EPI_ISL_14464712
EPI_ISL_12652571
EPI_ISL_13949098
EPI_ISL_12652482
EPI_ISL_13948707
EPI_ISL_13686509
EPI_ISL_13948652
EPI_ISL_13686415
EPI_ISL_13948963
EPI_ISL_13948973
EPI_ISL_14464592
EPI_ISL_13686458
EPI_ISL_13948719
EPI_ISL_13686413
EPI_ISL_13686664
EPI_ISL_13686525
EPI_ISL_13948972
EPI_ISL_13948716
EPI_ISL_12652505
EPI_ISL_12652322
EPI_ISL_12652355
EPI_ISL_12652420
EPI_ISL_12652372
EPI_ISL_12652393
EPI_ISL_12652395
EPI_ISL_12652557
EPI_ISL_12652592
EPI_ISL_12652387
EPI_ISL_12652317
EPI_ISL_12652454
EPI_ISL_12652341
EPI_ISL_12652349
EPI_ISL_12652455
EPI_ISL_12652565
EPI_ISL_12652447
EPI_ISL_12652582
EPI_ISL_12652398
EPI_ISL_13948598
EPI_ISL_13949072
EPI_ISL_14464610
EPI_ISL_13948496
EPI_ISL_13948596
EPI_ISL_14464757
EPI_ISL_13863002
EPI_ISL_14464724
EPI_ISL_13686524
EPI_ISL_13948479
EPI_ISL_13686592
EPI_ISL_13686439
EPI_ISL_13686342
EPI_ISL_12652321
EPI_ISL_13949029
EPI_ISL_13948617
EPI_ISL_12134862
EPI_ISL_12652409
EPI_ISL_13686444
EPI_ISL_13948628
EPI_ISL_12652227
EPI_ISL_14487007
EPI_ISL_13948567
EPI_ISL_14464607
EPI_ISL_13686522
EPI_ISL_14464672
EPI_ISL_13948593
EPI_ISL_13686605
EPI_ISL_13686466
EPI_ISL_14464710
EPI_ISL_13949117
EPI_ISL_14464754
EPI_ISL_14464708
EPI_ISL_13948477
EPI_ISL_13686630
EPI_ISL_13948835
EPI_ISL_13948937
EPI_ISL_14464699
EPI_ISL_14464701
EPI_ISL_13948589
EPI_ISL_13948528
EPI_ISL_13686637
EPI_ISL_14464658
EPI_ISL_14464725
EPI_ISL_13948634
EPI_ISL_13948667
EPI_ISL_12573819
EPI_ISL_12844858
EPI_ISL_13948633
EPI_ISL_13948511
EPI_ISL_13948641
EPI_ISL_13948275
EPI_ISL_13686640
EPI_ISL_13948291
EPI_ISL_13956795
EPI_ISL_12652394
EPI_ISL_13686435
EPI_ISL_13686338
EPI_ISL_13948929
EPI_ISL_13686532
EPI_ISL_12652225
EPI_ISL_14464587
EPI_ISL_12652408
EPI_ISL_13686557
EPI_ISL_13948661
EPI_ISL_14464591
EPI_ISL_12652430
EPI_ISL_12652167
EPI_ISL_13686601
EPI_ISL_12652562
EPI_ISL_14056971
EPI_ISL_13351499
EPI_ISL_14010426
EPI_ISL_14464572
EPI_ISL_13686660
EPI_ISL_13686568
EPI_ISL_13686677
EPI_ISL_15272946
EPI_ISL_13686390
EPI_ISL_13949050
EPI_ISL_13948703
EPI_ISL_13948620
EPI_ISL_13948791
EPI_ISL_14464577
EPI_ISL_13948793
EPI_ISL_14464594
EPI_ISL_14464597
EPI_ISL_12239908
EPI_ISL_13949011
EPI_ISL_13949010
EPI_ISL_14464720
EPI_ISL_13948768
EPI_ISL_14464640
EPI_ISL_13948639
EPI_ISL_13948578
EPI_ISL_13948498
EPI_ISL_14464704
EPI_ISL_12573877
EPI_ISL_13948857
EPI_ISL_12573719
EPI_ISL_12805164
EPI_ISL_13686124
EPI_ISL_15336311
EPI_ISL_13144919
EPI_ISL_14010434
EPI_ISL_15336307
EPI_ISL_12711102
EPI_ISL_14464750
EPI_ISL_13686399
EPI_ISL_12844956
EPI_ISL_13948683
EPI_ISL_13948933
EPI_ISL_13829286
EPI_ISL_12652135
EPI_ISL_12652136
EPI_ISL_13056973
EPI_ISL_14725270
EPI_ISL_14725271
EPI_ISL_12652152
EPI_ISL_13686297
EPI_ISL_13686394
EPI_ISL_12652249
EPI_ISL_12652291
EPI_ISL_12652234
EPI_ISL_14464759
EPI_ISL_13948790
EPI_ISL_12652320
EPI_ISL_13948740
EPI_ISL_14464636
EPI_ISL_13948715
EPI_ISL_12652305
EPI_ISL_12652340
EPI_ISL_13949085
EPI_ISL_13948611
EPI_ISL_14464746
EPI_ISL_13948491
EPI_ISL_14464609
EPI_ISL_13948689
EPI_ISL_13686585
EPI_ISL_13686586
EPI_ISL_13948492
EPI_ISL_14464582
EPI_ISL_13948945
EPI_ISL_13949024
EPI_ISL_13948917
EPI_ISL_13948810
EPI_ISL_12652550
EPI_ISL_12844904
EPI_ISL_13948520
EPI_ISL_13686495
EPI_ISL_14464752
EPI_ISL_13948607
EPI_ISL_13948814
EPI_ISL_13057029
EPI_ISL_13351422
EPI_ISL_13057032
EPI_ISL_13056966
EPI_ISL_13948463
EPI_ISL_12432901
EPI_ISL_12239964
EPI_ISL_12432913
EPI_ISL_12844942
EPI_ISL_13863156
EPI_ISL_12134849
EPI_ISL_12573816
EPI_ISL_12573790
EPI_ISL_12134866
EPI_ISL_12134882
EPI_ISL_12432884
EPI_ISL_12573857
EPI_ISL_13057113
EPI_ISL_13057195
EPI_ISL_13057046
EPI_ISL_13057052
EPI_ISL_12641632
EPI_ISL_13057145
EPI_ISL_13463273
EPI_ISL_12844832
EPI_ISL_13863022
EPI_ISL_13056912
EPI_ISL_12844922
EPI_ISL_13463338
EPI_ISL_12844812
EPI_ISL_14010420
EPI_ISL_13056934
EPI_ISL_13863075
EPI_ISL_13351462
EPI_ISL_13057088
EPI_ISL_12134832
EPI_ISL_12573866
EPI_ISL_11685988
EPI_ISL_13057001
EPI_ISL_12573880
EPI_ISL_13463272
EPI_ISL_13463360
EPI_ISL_13057097
EPI_ISL_11685982
EPI_ISL_12134856
EPI_ISL_12573861
EPI_ISL_13057128
EPI_ISL_13351447
EPI_ISL_12844820
EPI_ISL_12239926
EPI_ISL_13056957
EPI_ISL_12432842
EPI_ISL_12573753
EPI_ISL_12573824
EPI_ISL_12844959
EPI_ISL_13351404
EPI_ISL_13056960
EPI_ISL_12573825
EPI_ISL_12573701
EPI_ISL_12573867
EPI_ISL_12573712
EPI_ISL_12573724
EPI_ISL_14010429
EPI_ISL_12573698
EPI_ISL_12573716
EPI_ISL_12476941
EPI_ISL_12844974
EPI_ISL_13430043
EPI_ISL_14464608
EPI_ISL_14464671
EPI_ISL_13863036
EPI_ISL_14487077
EPI_ISL_14487107
EPI_ISL_12296654
EPI_ISL_13350681
EPI_ISL_14010497
EPI_ISL_12573853
EPI_ISL_13956797
EPI_ISL_14056974
EPI_ISL_14437692
EPI_ISL_12567418
EPI_ISL_13948618
EPI_ISL_14464670
EPI_ISL_14464595
EPI_ISL_14464624
EPI_ISL_14464716
EPI_ISL_13430496
EPI_ISL_13948290
EPI_ISL_13686656
EPI_ISL_13686590
EPI_ISL_13948655
EPI_ISL_13686629
EPI_ISL_14464706
EPI_ISL_13949019
EPI_ISL_12873804
EPI_ISL_13144905
EPI_ISL_15336245
EPI_ISL_13055072
EPI_ISL_12805087
EPI_ISL_13055019
EPI_ISL_12307770
EPI_ISL_12109780
EPI_ISL_12476643
EPI_ISL_13949017
EPI_ISL_13056921
EPI_ISL_13057164
EPI_ISL_12641636
EPI_ISL_12805144
EPI_ISL_14464659
EPI_ISL_14437939
EPI_ISL_14253736
EPI_ISL_13948943
EPI_ISL_13948677
EPI_ISL_12873807
EPI_ISL_13948631
EPI_ISL_13948549
EPI_ISL_13057076
EPI_ISL_13686461
EPI_ISL_13686365
EPI_ISL_11413366
EPI_ISL_14464689
EPI_ISL_12652396
EPI_ISL_15272611
EPI_ISL_12239917
EPI_ISL_12573860
EPI_ISL_11685979
EPI_ISL_12134813
EPI_ISL_13863023
EPI_ISL_11413370
EPI_ISL_12134822
EPI_ISL_13056945
EPI_ISL_12432912
EPI_ISL_13055329
EPI_ISL_12844795
EPI_ISL_13057069
EPI_ISL_13350659
EPI_ISL_14464634
EPI_ISL_12134861
EPI_ISL_13701551
EPI_ISL_12844915
EPI_ISL_12573859
EPI_ISL_11685947
EPI_ISL_11685952
EPI_ISL_11685953
EPI_ISL_11685986
EPI_ISL_12432873
EPI_ISL_12573884
EPI_ISL_12844787
EPI_ISL_12844838
EPI_ISL_13463313
EPI_ISL_12844822
EPI_ISL_14464768
EPI_ISL_13057090
EPI_ISL_13056972
EPI_ISL_12573865
EPI_ISL_12844876
EPI_ISL_12844836
EPI_ISL_12844776
EPI_ISL_13057048
EPI_ISL_12134899
EPI_ISL_12134841
EPI_ISL_12134812
EPI_ISL_12134883
EPI_ISL_12239982
EPI_ISL_12432869
EPI_ISL_12573706
EPI_ISL_12844953
EPI_ISL_13948303
EPI_ISL_13686120
EPI_ISL_13948966
EPI_ISL_13686501
EPI_ISL_13948941
EPI_ISL_13686226
EPI_ISL_13686584
EPI_ISL_13686244
EPI_ISL_13686602
EPI_ISL_13948513
EPI_ISL_13948999
EPI_ISL_13144861
EPI_ISL_13949004
EPI_ISL_13948637
EPI_ISL_14010418
EPI_ISL_12573726
EPI_ISL_12844807
EPI_ISL_13948616
EPI_ISL_13948500
EPI_ISL_14464586
EPI_ISL_13948743
EPI_ISL_13948800
EPI_ISL_13686443
EPI_ISL_13463370
EPI_ISL_14010468
EPI_ISL_12652351
EPI_ISL_13686507
EPI_ISL_13948396
EPI_ISL_13686432
EPI_ISL_13948663
EPI_ISL_13948911
EPI_ISL_13948722
EPI_ISL_13948803
EPI_ISL_13948542
EPI_ISL_13948543
EPI_ISL_13948605
EPI_ISL_13948525
EPI_ISL_13948630
EPI_ISL_13686549
EPI_ISL_13055066
EPI_ISL_12805171
EPI_ISL_13144869
EPI_ISL_12109690
EPI_ISL_14464693
EPI_ISL_13956807
EPI_ISL_12873799
EPI_ISL_13948776
EPI_ISL_12805147
EPI_ISL_13055330
EPI_ISL_14464619
EPI_ISL_13948714
EPI_ISL_13686547
EPI_ISL_12873753
EPI_ISL_12844785
EPI_ISL_13463327
EPI_ISL_14464687
EPI_ISL_13948557
EPI_ISL_13056997
EPI_ISL_13863205
EPI_ISL_12476642
EPI_ISL_13863004
EPI_ISL_13686456
EPI_ISL_13057116
EPI_ISL_12652318
EPI_ISL_12307760
EPI_ISL_12476667
EPI_ISL_12307776
EPI_ISL_12652343
EPI_ISL_13948952
EPI_ISL_13430093
EPI_ISL_12476663
EPI_ISL_12476668
EPI_ISL_14464647
EPI_ISL_13686445
EPI_ISL_13686349
EPI_ISL_13686359
EPI_ISL_15335840
EPI_ISL_14464616
EPI_ISL_13057157
EPI_ISL_13956811
EPI_ISL_13686622
EPI_ISL_14464618
EPI_ISL_13948782
EPI_ISL_14464638
EPI_ISL_13686521
EPI_ISL_12805170
EPI_ISL_15336265
EPI_ISL_12239936
EPI_ISL_14464688
EPI_ISL_12432897
EPI_ISL_14464698
EPI_ISL_13948847
EPI_ISL_13948801
EPI_ISL_12652203
EPI_ISL_12844828
EPI_ISL_12573742
EPI_ISL_12652146
EPI_ISL_13948577
EPI_ISL_12652330
EPI_ISL_13686455
EPI_ISL_14464613
EPI_ISL_13686659
EPI_ISL_13686414
EPI_ISL_14464813
EPI_ISL_14464665
EPI_ISL_13686418
EPI_ISL_13686396
EPI_ISL_13948580
EPI_ISL_13686671
EPI_ISL_13686588
EPI_ISL_13948754
EPI_ISL_13948736
EPI_ISL_13686388
EPI_ISL_13948558
EPI_ISL_13057050
EPI_ISL_12805084
EPI_ISL_12844912
EPI_ISL_12844881
EPI_ISL_13686505
EPI_ISL_14464656
EPI_ISL_13948849
EPI_ISL_14464657
EPI_ISL_12652177
EPI_ISL_12652223
EPI_ISL_13686571
EPI_ISL_13686610
EPI_ISL_14010425
EPI_ISL_13948502
EPI_ISL_13686654
EPI_ISL_13948935
EPI_ISL_13948729
EPI_ISL_13948720
EPI_ISL_13686653
EPI_ISL_13686517
EPI_ISL_13948848
EPI_ISL_13948555
EPI_ISL_13351379
EPI_ISL_12844930
EPI_ISL_11532820
EPI_ISL_13333050
EPI_ISL_11993073
EPI_ISL_12109689
EPI_ISL_12109725
EPI_ISL_12109729
EPI_ISL_13491618
EPI_ISL_11993084
EPI_ISL_12109680
EPI_ISL_12109730
EPI_ISL_13639526
EPI_ISL_14103150
EPI_ISL_13491621
EPI_ISL_14987763
EPI_ISL_14987751
EPI_ISL_14987756
EPI_ISL_13639529
EPI_ISL_13639521
EPI_ISL_14103145
EPI_ISL_14103157
EPI_ISL_13948301
EPI_ISL_14908312
EPI_ISL_12134874
EPI_ISL_12134884
EPI_ISL_13686412
EPI_ISL_13686131
EPI_ISL_13948585
EPI_ISL_13686508
EPI_ISL_13430027
EPI_ISL_12307763
EPI_ISL_12476633
EPI_ISL_13430097
EPI_ISL_12476644
EPI_ISL_12307741
EPI_ISL_14725434
EPI_ISL_12573754
EPI_ISL_13429990
EPI_ISL_14523942
EPI_ISL_13144863
EPI_ISL_13057080
EPI_ISL_12805151
EPI_ISL_13057156
EPI_ISL_13863207
EPI_ISL_13948786
EPI_ISL_12573786
EPI_ISL_13686523
EPI_ISL_12573823
EPI_ISL_13863058
EPI_ISL_14010507
EPI_ISL_12476665
EPI_ISL_14253776
EPI_ISL_12641634
EPI_ISL_13429981
EPI_ISL_13055074
EPI_ISL_13057176
EPI_ISL_13144868
EPI_ISL_12307755
EPI_ISL_13144866
EPI_ISL_13430498
EPI_ISL_12641640
EPI_ISL_12476640
EPI_ISL_13948997
EPI_ISL_13863008
EPI_ISL_13863104
EPI_ISL_14464713
EPI_ISL_14464714
EPI_ISL_14464628
EPI_ISL_12652471
EPI_ISL_13686526
EPI_ISL_13686423
EPI_ISL_13686326
EPI_ISL_13949000
EPI_ISL_13948552
EPI_ISL_14464727
EPI_ISL_13948836
EPI_ISL_14464599
EPI_ISL_13948480
EPI_ISL_14464575
EPI_ISL_13948649
EPI_ISL_13948581
EPI_ISL_12652410
EPI_ISL_12652359
EPI_ISL_13948749
EPI_ISL_13948974
EPI_ISL_13948329
EPI_ISL_13948921
EPI_ISL_13948845
EPI_ISL_13686272
EPI_ISL_13686262
EPI_ISL_13686485
EPI_ISL_13948923
EPI_ISL_11180078
EPI_ISL_12109684
EPI_ISL_13948481
EPI_ISL_13948310
EPI_ISL_13948787
EPI_ISL_13948876
EPI_ISL_14010505
EPI_ISL_12641620
EPI_ISL_13057169
EPI_ISL_13948624
EPI_ISL_13948700
EPI_ISL_11295217
EPI_ISL_11993078
EPI_ISL_13686454
EPI_ISL_13686358
EPI_ISL_13948487
EPI_ISL_13948495
EPI_ISL_14464585
EPI_ISL_14464621
EPI_ISL_14486983
EPI_ISL_14486939
EPI_ISL_14487049
EPI_ISL_13055081
EPI_ISL_13948987
EPI_ISL_13463287
EPI_ISL_13463296
EPI_ISL_13863001
EPI_ISL_12109691
EPI_ISL_11993064
EPI_ISL_12307769
EPI_ISL_12573876
EPI_ISL_11685938
EPI_ISL_12134824
EPI_ISL_13863028
EPI_ISL_12844909
EPI_ISL_12844913
EPI_ISL_14103154
EPI_ISL_12432857
EPI_ISL_12641633
EPI_ISL_12573715
EPI_ISL_15336077
EPI_ISL_14464761
EPI_ISL_13686292
EPI_ISL_13686345
EPI_ISL_13686271
EPI_ISL_14464680
EPI_ISL_13686442
EPI_ISL_13686570
EPI_ISL_13686389
EPI_ISL_13686395
EPI_ISL_13686378
EPI_ISL_13948644
EPI_ISL_13948489
EPI_ISL_13686543
EPI_ISL_13948843
EPI_ISL_13686474
EPI_ISL_13686562
EPI_ISL_13686567
EPI_ISL_14464695
EPI_ISL_13686267
EPI_ISL_13948473
EPI_ISL_13686645
EPI_ISL_12652376
EPI_ISL_13686650
EPI_ISL_13948276
EPI_ISL_13948554
EPI_ISL_13686515
EPI_ISL_12652499
EPI_ISL_14464733
EPI_ISL_14464734
EPI_ISL_14464579
EPI_ISL_13686609
EPI_ISL_13686625
EPI_ISL_13686626
EPI_ISL_13686548
EPI_ISL_14464614
EPI_ISL_13948277
EPI_ISL_12652181
EPI_ISL_12652413
EPI_ISL_12652158
EPI_ISL_13686336
EPI_ISL_13686553
EPI_ISL_13686433
EPI_ISL_13686438
EPI_ISL_13686341
EPI_ISL_13686544
EPI_ISL_13686275
EPI_ISL_13686172
EPI_ISL_12652460
EPI_ISL_12652268
EPI_ISL_12652309
EPI_ISL_12652542
EPI_ISL_12652403
EPI_ISL_12652382
EPI_ISL_13686153
EPI_ISL_13948879
EPI_ISL_13686315
EPI_ISL_15272779
EPI_ISL_13948497
EPI_ISL_13948305
EPI_ISL_14464718
EPI_ISL_13686263
EPI_ISL_13948693
EPI_ISL_13948925
EPI_ISL_13948293
EPI_ISL_13948980
EPI_ISL_13948985
EPI_ISL_12652561
EPI_ISL_13948909
EPI_ISL_12652286
EPI_ISL_13948360
EPI_ISL_13948326
EPI_ISL_13686624
EPI_ISL_13948331
EPI_ISL_13948341
EPI_ISL_13948343
EPI_ISL_13948351
EPI_ISL_13948991
EPI_ISL_13948306
EPI_ISL_13948664
EPI_ISL_13686621
EPI_ISL_13686343
EPI_ISL_13686266
EPI_ISL_12652311
EPI_ISL_13948819
EPI_ISL_13686145
EPI_ISL_13686486
EPI_ISL_13686480
EPI_ISL_13686140
EPI_ISL_13686258
EPI_ISL_13686451
EPI_ISL_13686355
EPI_ISL_12652473
EPI_ISL_14464652
EPI_ISL_13948780
EPI_ISL_13948519
EPI_ISL_13948330
EPI_ISL_13686440
EPI_ISL_13948812
EPI_ISL_12652442
EPI_ISL_14464574
EPI_ISL_13948869
EPI_ISL_13948697
EPI_ISL_14464604
EPI_ISL_13686167
EPI_ISL_13948932
EPI_ISL_13948297
EPI_ISL_13686154
EPI_ISL_13686582
EPI_ISL_13686164
EPI_ISL_14464677
EPI_ISL_13686491
EPI_ISL_13948321
EPI_ISL_12652375
EPI_ISL_12652238
EPI_ISL_13948961
EPI_ISL_13948464
EPI_ISL_13686552
EPI_ISL_13948514
EPI_ISL_13686375
EPI_ISL_13948537
EPI_ISL_13686132
EPI_ISL_13686520
EPI_ISL_13686471
EPI_ISL_13948678
EPI_ISL_13948829
EPI_ISL_13948665
EPI_ISL_14464649
EPI_ISL_13948757
EPI_ISL_13948908
EPI_ISL_13948947
EPI_ISL_13948591
EPI_ISL_14464641
EPI_ISL_13948485
EPI_ISL_14487142
EPI_ISL_13948315
EPI_ISL_12652237
EPI_ISL_13686155
EPI_ISL_13948900
EPI_ISL_13948767
EPI_ISL_13686370
EPI_ISL_12652300
EPI_ISL_13686182
EPI_ISL_12652245
EPI_ISL_13948864
EPI_ISL_13948509
EPI_ISL_14464806
EPI_ISL_12652596
EPI_ISL_13949106
EPI_ISL_12652272
EPI_ISL_13948851
EPI_ISL_13948332
EPI_ISL_14464655
EPI_ISL_13948673
EPI_ISL_13686340
EPI_ISL_13686302
EPI_ISL_13948875
EPI_ISL_13948931
EPI_ISL_13686504
EPI_ISL_13948898
EPI_ISL_13948344
EPI_ISL_13948926
EPI_ISL_14464762
EPI_ISL_13686300
EPI_ISL_14464742
EPI_ISL_13948327
EPI_ISL_13948881
EPI_ISL_13948886
EPI_ISL_13686518
EPI_ISL_13948503
EPI_ISL_13686312
EPI_ISL_13686293
EPI_ISL_12652221
EPI_ISL_12652491
EPI_ISL_13948957
EPI_ISL_13948687
EPI_ISL_14464828
EPI_ISL_13948983
EPI_ISL_12652315
EPI_ISL_13948853
EPI_ISL_13686339
EPI_ISL_13948373
EPI_ISL_13948359
EPI_ISL_12652554
EPI_ISL_13948863
EPI_ISL_13686337
EPI_ISL_13686178
EPI_ISL_13948576
EPI_ISL_13948340
EPI_ISL_13686127
EPI_ISL_13686180
EPI_ISL_13948314
EPI_ISL_13686318
EPI_ISL_13686328
EPI_ISL_13686354
EPI_ISL_13948685
EPI_ISL_14464717
EPI_ISL_13686301
EPI_ISL_13948865
EPI_ISL_13948862
EPI_ISL_13948337
EPI_ISL_13686335
EPI_ISL_13948289
EPI_ISL_15272660
EPI_ISL_13686502
EPI_ISL_13948573
EPI_ISL_13948899
EPI_ISL_13686316
EPI_ISL_13948856
EPI_ISL_13948588
EPI_ISL_13686499
EPI_ISL_12652510
EPI_ISL_13948866
EPI_ISL_13948704
EPI_ISL_13948699
EPI_ISL_13686310
EPI_ISL_13948688
EPI_ISL_13948560
EPI_ISL_13686366
EPI_ISL_13686294
EPI_ISL_15272654
EPI_ISL_13686134
EPI_ISL_12652283
EPI_ISL_13948508
EPI_ISL_13948352
EPI_ISL_13948752
EPI_ISL_13948916
EPI_ISL_12652280
EPI_ISL_15272934
EPI_ISL_15273070
EPI_ISL_13686206
EPI_ISL_13686264
EPI_ISL_12652481
EPI_ISL_14464645
EPI_ISL_13948295
EPI_ISL_13686246
EPI_ISL_13686268
EPI_ISL_13948643
EPI_ISL_12652599
EPI_ISL_13686143
EPI_ISL_13948320
EPI_ISL_14464719
EPI_ISL_13949109
EPI_ISL_13948924
EPI_ISL_13948694
EPI_ISL_13686321
EPI_ISL_12652490
EPI_ISL_13948353
EPI_ISL_13686675
EPI_ISL_13948346
EPI_ISL_13948742
EPI_ISL_13948319
EPI_ISL_13686478
EPI_ISL_13686122
EPI_ISL_13948831
EPI_ISL_13948802
EPI_ISL_13686303
EPI_ISL_12652494
EPI_ISL_13949015
EPI_ISL_13948872
EPI_ISL_13948507
EPI_ISL_14464644
EPI_ISL_12652448
EPI_ISL_12652153
EPI_ISL_14464678
EPI_ISL_13686317
EPI_ISL_13949009
EPI_ISL_13686348
EPI_ISL_12652162
EPI_ISL_12652536
EPI_ISL_13948530
EPI_ISL_13686669
EPI_ISL_13948764
EPI_ISL_13686529
EPI_ISL_13686255
EPI_ISL_12652397
EPI_ISL_13949064
EPI_ISL_12652331
EPI_ISL_12652163
EPI_ISL_13948907
EPI_ISL_13948483
EPI_ISL_13948868
EPI_ISL_13686141
EPI_ISL_13948599
EPI_ISL_13686291
EPI_ISL_13686383
EPI_ISL_13948772
EPI_ISL_13948771
EPI_ISL_13948770
EPI_ISL_13948773
EPI_ISL_13949060
EPI_ISL_14464845
EPI_ISL_14464846
EPI_ISL_13948686
EPI_ISL_13948474
EPI_ISL_12652260
EPI_ISL_13948877
EPI_ISL_13948795
EPI_ISL_13948294
EPI_ISL_13948794
EPI_ISL_13948333
EPI_ISL_14464600
EPI_ISL_13948292
EPI_ISL_14464705
EPI_ISL_13948828
EPI_ISL_13948903
EPI_ISL_14464751
EPI_ISL_13948475
EPI_ISL_13686527
EPI_ISL_14464696
EPI_ISL_13948724
EPI_ISL_13948858
EPI_ISL_13948811
EPI_ISL_13948505
EPI_ISL_14464593
EPI_ISL_13948674
EPI_ISL_13686400
EPI_ISL_13948728
EPI_ISL_13948744
EPI_ISL_13948625
EPI_ISL_12652232
EPI_ISL_13948286
EPI_ISL_13686449
EPI_ISL_13686551
EPI_ISL_13948600
EPI_ISL_13948590
EPI_ISL_14464685
EPI_ISL_13686269
EPI_ISL_13686353
EPI_ISL_13351396
EPI_ISL_13686599
EPI_ISL_13436138
EPI_ISL_13829267
EPI_ISL_12641637
EPI_ISL_14487063
EPI_ISL_12573780
EPI_ISL_12844845
EPI_ISL_14010508
EPI_ISL_13463373
EPI_ISL_13351395
EPI_ISL_13863031
EPI_ISL_15272709
EPI_ISL_13948632
EPI_ISL_13948891
EPI_ISL_13948993
EPI_ISL_14487106
EPI_ISL_12652377
EPI_ISL_13686539
EPI_ISL_14464773
EPI_ISL_13948484
EPI_ISL_14464571
EPI_ISL_12652214
EPI_ISL_13686576
EPI_ISL_15272733
EPI_ISL_15273031
EPI_ISL_13686628
EPI_ISL_13948672
EPI_ISL_13949027
EPI_ISL_14464583
EPI_ISL_13948956
EPI_ISL_13948299
EPI_ISL_13686344
EPI_ISL_13686441
EPI_ISL_12652218
EPI_ISL_13948959
EPI_ISL_13948735
EPI_ISL_13948824
EPI_ISL_13949045
EPI_ISL_13686620
EPI_ISL_13949051
EPI_ISL_14464766
EPI_ISL_13948946
EPI_ISL_14464732
EPI_ISL_13948709
EPI_ISL_13948302
EPI_ISL_14464684
EPI_ISL_13948515
EPI_ISL_12652353
EPI_ISL_13686611
EPI_ISL_13686534
EPI_ISL_13686666
EPI_ISL_14464735
EPI_ISL_14464601
EPI_ISL_13948358
EPI_ISL_13948534
EPI_ISL_13686367
EPI_ISL_13686463
EPI_ISL_13948852
EPI_ISL_12652215
EPI_ISL_13948285
EPI_ISL_13686673
EPI_ISL_13686146
EPI_ISL_13948512
EPI_ISL_13686530
EPI_ISL_14464692
EPI_ISL_12652242
EPI_ISL_13948597
EPI_ISL_13949002
EPI_ISL_13686464
EPI_ISL_13948556
EPI_ISL_13948778
EPI_ISL_12109769
EPI_ISL_12805095
EPI_ISL_13056985
EPI_ISL_13463309
EPI_ISL_13686536
EPI_ISL_12573828
EPI_ISL_13351477
EPI_ISL_13351421
EPI_ISL_14010427
EPI_ISL_12432896
EPI_ISL_12134852
EPI_ISL_13057025
EPI_ISL_13463323
EPI_ISL_12239961
EPI_ISL_13057154
EPI_ISL_13057155
EPI_ISL_12573888
EPI_ISL_13057053
EPI_ISL_12844862
EPI_ISL_13057103
EPI_ISL_13057151
EPI_ISL_13351402
EPI_ISL_12476641
EPI_ISL_13948307
EPI_ISL_13948470
EPI_ISL_13055021
EPI_ISL_13948910
EPI_ISL_12844834
EPI_ISL_13057179
EPI_ISL_14487025
EPI_ISL_13463294
EPI_ISL_13948690
EPI_ISL_13351397
EPI_ISL_12844846
EPI_ISL_13719277
EPI_ISL_13056968
EPI_ISL_12239991
EPI_ISL_13351375
EPI_ISL_14464588
EPI_ISL_13463274
EPI_ISL_13686608
EPI_ISL_13686542
EPI_ISL_13948544
EPI_ISL_13057098
EPI_ISL_13948563
EPI_ISL_14464605
EPI_ISL_14464611
EPI_ISL_14464620
EPI_ISL_14464622
EPI_ISL_13948648
EPI_ISL_12652216
EPI_ISL_13948748
EPI_ISL_13948654
EPI_ISL_13948653
EPI_ISL_13948296
EPI_ISL_13948646
EPI_ISL_13686579
EPI_ISL_13948738
EPI_ISL_13948521
EPI_ISL_13948559
EPI_ISL_14464709
EPI_ISL_13686531
EPI_ISL_13948601
EPI_ISL_13948614
EPI_ISL_14464681
EPI_ISL_13948781
EPI_ISL_13948755
EPI_ISL_13686580
EPI_ISL_14464578
EPI_ISL_14464580
EPI_ISL_13948784
EPI_ISL_13948566
EPI_ISL_13948753
EPI_ISL_14464686
EPI_ISL_13949026
EPI_ISL_13948282
EPI_ISL_13056935
EPI_ISL_12652284
EPI_ISL_13948873
EPI_ISL_12652480
EPI_ISL_13948287
EPI_ISL_13948883
EPI_ISL_13948832
EPI_ISL_13948870
EPI_ISL_13686139
EPI_ISL_13686166
EPI_ISL_13948842
EPI_ISL_13948927
EPI_ISL_13686168
EPI_ISL_14464667
EPI_ISL_13948345
EPI_ISL_13948889
EPI_ISL_13948751
EPI_ISL_13686368
EPI_ISL_13686574
EPI_ISL_13948841
EPI_ISL_12652255
EPI_ISL_13948818
EPI_ISL_13948978
EPI_ISL_13948913
EPI_ISL_13686573
EPI_ISL_13948882
EPI_ISL_13686170
EPI_ISL_13686173
EPI_ISL_13686123
EPI_ISL_13948992
EPI_ISL_13686144
EPI_ISL_12652217
EPI_ISL_13686469
EPI_ISL_13686417
EPI_ISL_13686320
EPI_ISL_13686373
EPI_ISL_14464682
EPI_ISL_14487020
EPI_ISL_14487231
EPI_ISL_14487222
EPI_ISL_14487030
EPI_ISL_14487072
EPI_ISL_13948472
EPI_ISL_13057171
EPI_ISL_12844972
EPI_ISL_13948586
EPI_ISL_14464821
EPI_ISL_13863179
EPI_ISL_13948486
EPI_ISL_13948311
EPI_ISL_15336295
EPI_ISL_13949022
EPI_ISL_13949018
EPI_ISL_15272663
EPI_ISL_15273013
EPI_ISL_12652333
EPI_ISL_13949036
EPI_ISL_14464635
EPI_ISL_13430494
EPI_ISL_14253665
EPI_ISL_13351417
EPI_ISL_13463351
EPI_ISL_12476635
EPI_ISL_13948880
EPI_ISL_13686147
EPI_ISL_13430035
EPI_ISL_14056964
EPI_ISL_14056965
EPI_ISL_13956798
EPI_ISL_12805092
EPI_ISL_13144911
EPI_ISL_13863153
EPI_ISL_12476979
EPI_ISL_14487093
EPI_ISL_13948546
EPI_ISL_14464744
EPI_ISL_13430041
EPI_ISL_15336299
EPI_ISL_14056970
EPI_ISL_14487005
EPI_ISL_14487016
EPI_ISL_14486965
EPI_ISL_13894450
EPI_ISL_14908268
EPI_ISL_13429982
EPI_ISL_13436135
EPI_ISL_12711039
EPI_ISL_14010437
EPI_ISL_13686593
EPI_ISL_14464753
EPI_ISL_13686661
EPI_ISL_13463299
EPI_ISL_13863029
EPI_ISL_13948734
EPI_ISL_14464651
EPI_ISL_13948867
EPI_ISL_13948676
EPI_ISL_13949006
EPI_ISL_13686410
EPI_ISL_14464661
EPI_ISL_13948969
EPI_ISL_13948960
EPI_ISL_14464627
EPI_ISL_14464690
EPI_ISL_13948656
EPI_ISL_13686512
EPI_ISL_13686643
EPI_ISL_13686513
EPI_ISL_13686411
EPI_ISL_13686313
EPI_ISL_13686493
EPI_ISL_13686314
EPI_ISL_13948901
EPI_ISL_13686437
EPI_ISL_13948523
EPI_ISL_13948583
EPI_ISL_13948626
EPI_ISL_13948550
EPI_ISL_13686550
EPI_ISL_13948928
EPI_ISL_14464632
EPI_ISL_13948934
EPI_ISL_13949014
EPI_ISL_13948971
EPI_ISL_13686404
EPI_ISL_13686307
EPI_ISL_12652344
EPI_ISL_12652231
EPI_ISL_12652236
EPI_ISL_13948548
EPI_ISL_12652240
EPI_ISL_12652170
EPI_ISL_13948708
EPI_ISL_14487000
EPI_ISL_12652244
EPI_ISL_13686649
EPI_ISL_12641635
EPI_ISL_13463314
EPI_ISL_12432853
EPI_ISL_13948986
EPI_ISL_14486993
EPI_ISL_14486996
EPI_ISL_13430481
EPI_ISL_13701557
EPI_ISL_14487044
EPI_ISL_13863030
EPI_ISL_15336308
EPI_ISL_13491619
EPI_ISL_13701493
EPI_ISL_13430485
EPI_ISL_14987744
EPI_ISL_12432840
EPI_ISL_13949016
EPI_ISL_13686494
EPI_ISL_12573850
EPI_ISL_13863182
EPI_ISL_13948692
EPI_ISL_12573818
EPI_ISL_13351510
EPI_ISL_14487014
EPI_ISL_14487012
EPI_ISL_14487141
EPI_ISL_13894447
EPI_ISL_14486984
EPI_ISL_14487043
EPI_ISL_14487021
EPI_ISL_14487031
EPI_ISL_14487062
EPI_ISL_14486988
EPI_ISL_14487006
EPI_ISL_14487003
EPI_ISL_13894443
EPI_ISL_14486977
EPI_ISL_14486990
EPI_ISL_13894432
EPI_ISL_14487041
EPI_ISL_14487019
EPI_ISL_13948494
EPI_ISL_13948938
EPI_ISL_14464603
EPI_ISL_13686181
EPI_ISL_13948747
EPI_ISL_13948657
EPI_ISL_13686462
EPI_ISL_13948467
EPI_ISL_13948609
EPI_ISL_13948918
EPI_ISL_14464590
EPI_ISL_13686623
EPI_ISL_13948334
EPI_ISL_13686138
EPI_ISL_13948328
EPI_ISL_14464626
EPI_ISL_13948919
EPI_ISL_13948635
EPI_ISL_13948279
EPI_ISL_13948717
EPI_ISL_12476647
EPI_ISL_12307752
EPI_ISL_12307767
EPI_ISL_13948681
EPI_ISL_13463340
EPI_ISL_13948510
EPI_ISL_14487083
EPI_ISL_13057130
EPI_ISL_13701518
EPI_ISL_13701532
EPI_ISL_14464767
EPI_ISL_15272741
EPI_ISL_13894418
EPI_ISL_12134854
EPI_ISL_13351369
EPI_ISL_14464617
EPI_ISL_12476628
EPI_ISL_15336313
EPI_ISL_12573807
EPI_ISL_12641616
EPI_ISL_14056994
EPI_ISL_12873757
EPI_ISL_12476922
EPI_ISL_12573805
EPI_ISL_12134898
EPI_ISL_14010435
EPI_ISL_13686575
EPI_ISL_13057184
EPI_ISL_13056952
EPI_ISL_13056961
EPI_ISL_11413337
EPI_ISL_12641617
EPI_ISL_12805148
EPI_ISL_12805085
EPI_ISL_12134896
EPI_ISL_12239935
EPI_ISL_12239979
EPI_ISL_12239989
EPI_ISL_12432860
EPI_ISL_12432862
EPI_ISL_12432866
EPI_ISL_12432868
EPI_ISL_12432918
EPI_ISL_12573784
EPI_ISL_12573855
EPI_ISL_12844925
EPI_ISL_13057049
EPI_ISL_13057051
EPI_ISL_13057062
EPI_ISL_13057138
EPI_ISL_13057180
EPI_ISL_13351372
EPI_ISL_13463289
EPI_ISL_13463305
EPI_ISL_13863012
EPI_ISL_14010452
EPI_ISL_14010455
EPI_ISL_14010463
EPI_ISL_12134878
EPI_ISL_12573789
EPI_ISL_12432841
EPI_ISL_12573707
EPI_ISL_12805168
EPI_ISL_13351468
EPI_ISL_12805146
EPI_ISL_12432919
EPI_ISL_12573831
EPI_ISL_12805172
EPI_ISL_13701467
EPI_ISL_12641627
EPI_ISL_14487028
EPI_ISL_13701489
EPI_ISL_11532825
EPI_ISL_13894456
EPI_ISL_14486972
EPI_ISL_14486981
EPI_ISL_14486961
EPI_ISL_13894440
EPI_ISL_13894433
EPI_ISL_14486956
EPI_ISL_14487032
EPI_ISL_14487004
EPI_ISL_14486970
EPI_ISL_11532826
EPI_ISL_12805165
EPI_ISL_13350675
EPI_ISL_14487009
EPI_ISL_13894430
EPI_ISL_14486982
EPI_ISL_13896497
EPI_ISL_13144910
EPI_ISL_14010438
EPI_ISL_13863013
EPI_ISL_12134825
EPI_ISL_12134889
EPI_ISL_12573826
EPI_ISL_12573793
EPI_ISL_12573794
EPI_ISL_13057101
EPI_ISL_13056992
EPI_ISL_13351364
EPI_ISL_13351484
EPI_ISL_13056930
EPI_ISL_14010432
EPI_ISL_13057041
EPI_ISL_13057000
EPI_ISL_11685972
EPI_ISL_13863157
EPI_ISL_13863033
EPI_ISL_12432858
EPI_ISL_12844831
EPI_ISL_13351478
EPI_ISL_13056929
EPI_ISL_12573847
EPI_ISL_12239946
EPI_ISL_13351418
EPI_ISL_14010431
EPI_ISL_13863160
EPI_ISL_12573822
EPI_ISL_12844965
EPI_ISL_12573767
EPI_ISL_12134881
EPI_ISL_13057186
EPI_ISL_12844973
EPI_ISL_13057190
EPI_ISL_12476957
EPI_ISL_12805160
EPI_ISL_12844887
EPI_ISL_13057185
EPI_ISL_12641628
EPI_ISL_12806643
EPI_ISL_13058982
EPI_ISL_13144913
EPI_ISL_13829281
EPI_ISL_12239942
EPI_ISL_13829287
EPI_ISL_13463367
EPI_ISL_13057189
EPI_ISL_14437672
EPI_ISL_13829301
EPI_ISL_13430098
EPI_ISL_12873746
EPI_ISL_13154849
EPI_ISL_11760200
EPI_ISL_11993067
EPI_ISL_12307764
EPI_ISL_13948805
[truncated: 738 more rows]
