# Supplementary material for: Genomic profiling and spatial SEIR modeling of COVID-19 transmission in Western New York
Source: Front Microbiol. 2024 Sep 27;15:1416580. doi: 10.3389/fmicb.2024.1416580 (PMC11468862; doi:10.3389/fmicb.2024.1416580)
Supplement: Supplementary file 2 [file Table_2.XLSX]

## Sheet: 2020
Region	Population	Date	Variant	Clade	Pango.lineage	n	clade.pango
all	2840341	2020-12-01		GH	A	1	GH-A
all	8419316	2020-04-01		S	A	3	S-A
all	8419316	2020-05-01		S	A	1	S-A
all	1382480	2020-04-01		S	A	1	S-A
Long Island	2840341	2020-12-01		GH	A	1	GH-A
New York City	8419316	2020-04-01		S	A	3	S-A
New York City	8419316	2020-05-01		S	A	1	S-A
Western New York	1382480	2020-04-01		S	A	1	S-A
all	1205380	2020-05-01		S	A.1	1	S-A.1
all	2840341	2020-04-01		S	A.1	2	S-A.1
all	8419316	2020-04-01		S	A.1	4	S-A.1
all	1382480	2020-04-01		S	A.1	11	S-A.1
all	14570000	2020-04-01		S	A.1	7	S-A.1
Finger Lakes	1205380	2020-05-01		S	A.1	1	S-A.1
Long Island	2840341	2020-04-01		S	A.1	2	S-A.1
New York City	8419316	2020-04-01		S	A.1	4	S-A.1
Ontario CA	14570000	2020-04-01		S	A.1	7	S-A.1
Western New York	1382480	2020-04-01		S	A.1	11	S-A.1
all	8419316	2020-08-01		G	A.19	1	G-A.19
New York City	8419316	2020-08-01		G	A.19	1	G-A.19
all	8419316	2020-12-01		G	A.2.5	1	G-A.2.5
New York City	8419316	2020-12-01		G	A.2.5	1	G-A.2.5
all	8419316	2020-12-01		S	A.21	1	S-A.21
New York City	8419316	2020-12-01		S	A.21	1	S-A.21
all	8419316	2020-12-01		S	A.28	1	S-A.28
New York City	8419316	2020-12-01		S	A.28	1	S-A.28
all	14570000	2020-04-01		S	A.3	1	S-A.3
Ontario CA	14570000	2020-04-01		S	A.3	1	S-A.3
all	14570000	2020-08-01		GR	AE.8	2	GR-AE.8
all	14570000	2020-09-01		GR	AE.8	33	GR-AE.8
all	14570000	2020-10-01		GR	AE.8	9	GR-AE.8
all	14570000	2020-11-01		GR	AE.8	47	GR-AE.8
all	14570000	2020-12-01		GR	AE.8	6	GR-AE.8
Ontario CA	14570000	2020-08-01		GR	AE.8	2	GR-AE.8
Ontario CA	14570000	2020-09-01		GR	AE.8	33	GR-AE.8
Ontario CA	14570000	2020-10-01		GR	AE.8	9	GR-AE.8
Ontario CA	14570000	2020-11-01		GR	AE.8	47	GR-AE.8
Ontario CA	14570000	2020-12-01		GR	AE.8	6	GR-AE.8
all	14570000	2020-11-01		GR	AL.1	42	GR-AL.1
all	14570000	2020-12-01		GR	AL.1	7	GR-AL.1
Ontario CA	14570000	2020-11-01		GR	AL.1	42	GR-AL.1
Ontario CA	14570000	2020-12-01		GR	AL.1	7	GR-AL.1
all	14570000	2020-11-01		GR	AM.2	5	GR-AM.2
Ontario CA	14570000	2020-11-01		GR	AM.2	5	GR-AM.2
all	14570000	2020-11-01		GR	AM.4	42	GR-AM.4
all	14570000	2020-12-01		GR	AM.4	37	GR-AM.4
Ontario CA	14570000	2020-11-01		GR	AM.4	42	GR-AM.4
Ontario CA	14570000	2020-12-01		GR	AM.4	37	GR-AM.4
all	8419316	2020-11-01	VOC Delta GK (B.1.617.2+AY.*)	GK	AY.3.1	1	GK-AY.3.1
New York City	8419316	2020-11-01	VOC Delta GK (B.1.617.2+AY.*)	GK	AY.3.1	1	GK-AY.3.1
all	2840341	2020-12-01		GH	B	1	GH-B
all	8419316	2020-04-01		V	B	5	V-B
all	8419316	2020-06-01		V	B	1	V-B
all	8419316	2020-11-01		O	B	1	O-B
all	1382480	2020-09-01		G	B	1	G-B
all	14570000	2020-04-01		V	B	6	V-B
Long Island	2840341	2020-12-01		GH	B	1	GH-B
New York City	8419316	2020-04-01		V	B	5	V-B
New York City	8419316	2020-06-01		V	B	1	V-B
New York City	8419316	2020-11-01		O	B	1	O-B
Ontario CA	14570000	2020-04-01		V	B	6	V-B
Western New York	1382480	2020-09-01		G	B	1	G-B
all	2319719	2020-10-01		GR	B.1.1.1	1	GR-B.1.1.1
all	8419316	2020-09-01		GR	B.1.1.1	2	GR-B.1.1.1
all	8419316	2020-10-01		GR	B.1.1.1	5	GR-B.1.1.1
all	8419316	2020-11-01		GR	B.1.1.1	2	GR-B.1.1.1
all	8419316	2020-12-01		GR	B.1.1.1	5	GR-B.1.1.1
all	14570000	2020-05-01		GR	B.1.1.1	1	GR-B.1.1.1
all	14570000	2020-06-01		GR	B.1.1.1	1	GR-B.1.1.1
all	14570000	2020-11-01		GR	B.1.1.1	4	GR-B.1.1.1
all	14570000	2020-12-01		GR	B.1.1.1	2	GR-B.1.1.1
Mid-Hudson	2319719	2020-10-01		GR	B.1.1.1	1	GR-B.1.1.1
New York City	8419316	2020-09-01		GR	B.1.1.1	2	GR-B.1.1.1
New York City	8419316	2020-10-01		GR	B.1.1.1	5	GR-B.1.1.1
New York City	8419316	2020-11-01		GR	B.1.1.1	2	GR-B.1.1.1
New York City	8419316	2020-12-01		GR	B.1.1.1	5	GR-B.1.1.1
Ontario CA	14570000	2020-05-01		GR	B.1.1.1	1	GR-B.1.1.1
Ontario CA	14570000	2020-06-01		GR	B.1.1.1	1	GR-B.1.1.1
Ontario CA	14570000	2020-11-01		GR	B.1.1.1	4	GR-B.1.1.1
Ontario CA	14570000	2020-12-01		GR	B.1.1.1	2	GR-B.1.1.1
all	1382480	2020-04-01		GR	B.1.1.10	1	GR-B.1.1.10
all	14570000	2020-04-01		GR	B.1.1.10	3	GR-B.1.1.10
Ontario CA	14570000	2020-04-01		GR	B.1.1.10	3	GR-B.1.1.10
Western New York	1382480	2020-04-01		GR	B.1.1.10	1	GR-B.1.1.10
all	8419316	2020-08-01		GR	B.1.1.101	1	GR-B.1.1.101
all	8419316	2020-10-01		GR	B.1.1.101	1	GR-B.1.1.101
all	8419316	2020-11-01		GR	B.1.1.101	1	GR-B.1.1.101
all	8419316	2020-12-01		GR	B.1.1.101	2	GR-B.1.1.101
New York City	8419316	2020-08-01		GR	B.1.1.101	1	GR-B.1.1.101
New York City	8419316	2020-10-01		GR	B.1.1.101	1	GR-B.1.1.101
New York City	8419316	2020-11-01		GR	B.1.1.101	1	GR-B.1.1.101
New York City	8419316	2020-12-01		GR	B.1.1.101	2	GR-B.1.1.101
all	486158	2020-12-01		GR	B.1.1.116	1	GR-B.1.1.116
Mohawk Valley	486158	2020-12-01		GR	B.1.1.116	1	GR-B.1.1.116
all	8419316	2020-10-01		GR	B.1.1.117	1	GR-B.1.1.117
New York City	8419316	2020-10-01		GR	B.1.1.117	1	GR-B.1.1.117
all	14570000	2020-07-01		GR	B.1.1.118	1	GR-B.1.1.118
Ontario CA	14570000	2020-07-01		GR	B.1.1.118	1	GR-B.1.1.118
all	8419316	2020-09-01		GR	B.1.1.123	1	GR-B.1.1.123
New York City	8419316	2020-09-01		GR	B.1.1.123	1	GR-B.1.1.123
all	8419316	2020-10-01		GR	B.1.1.128	2	GR-B.1.1.128
New York City	8419316	2020-10-01		GR	B.1.1.128	2	GR-B.1.1.128
all	486158	2020-06-01		GR	B.1.1.135	2	GR-B.1.1.135
all	8419316	2020-10-01		GR	B.1.1.135	3	GR-B.1.1.135
all	14570000	2020-07-01		GR	B.1.1.135	1	GR-B.1.1.135
Mohawk Valley	486158	2020-06-01		GR	B.1.1.135	2	GR-B.1.1.135
New York City	8419316	2020-10-01		GR	B.1.1.135	3	GR-B.1.1.135
Ontario CA	14570000	2020-07-01		GR	B.1.1.135	1	GR-B.1.1.135
all	14570000	2020-07-01		GR	B.1.1.157	5	GR-B.1.1.157
all	14570000	2020-08-01		GR	B.1.1.157	32	GR-B.1.1.157
all	14570000	2020-09-01		GR	B.1.1.157	15	GR-B.1.1.157
all	14570000	2020-10-01		GR	B.1.1.157	6	GR-B.1.1.157
all	14570000	2020-11-01		GR	B.1.1.157	28	GR-B.1.1.157
all	14570000	2020-12-01		GR	B.1.1.157	3	GR-B.1.1.157
Ontario CA	14570000	2020-07-01		GR	B.1.1.157	5	GR-B.1.1.157
Ontario CA	14570000	2020-08-01		GR	B.1.1.157	32	GR-B.1.1.157
Ontario CA	14570000	2020-09-01		GR	B.1.1.157	15	GR-B.1.1.157
Ontario CA	14570000	2020-10-01		GR	B.1.1.157	6	GR-B.1.1.157
Ontario CA	14570000	2020-11-01		GR	B.1.1.157	28	GR-B.1.1.157
Ontario CA	14570000	2020-12-01		GR	B.1.1.157	3	GR-B.1.1.157
all	8419316	2020-12-01		GR	B.1.1.159	1	GR-B.1.1.159
New York City	8419316	2020-12-01		GR	B.1.1.159	1	GR-B.1.1.159
all	8419316	2020-12-01		GR	B.1.1.161	2	GR-B.1.1.161
New York City	8419316	2020-12-01		GR	B.1.1.161	2	GR-B.1.1.161
all	14570000	2020-05-01		GR	B.1.1.176	1	GR-B.1.1.176
all	14570000	2020-10-01		GR	B.1.1.176	3	GR-B.1.1.176
all	14570000	2020-11-01		GR	B.1.1.176	5	GR-B.1.1.176
all	14570000	2020-12-01		GR	B.1.1.176	3	GR-B.1.1.176
Ontario CA	14570000	2020-05-01		GR	B.1.1.176	1	GR-B.1.1.176
Ontario CA	14570000	2020-10-01		GR	B.1.1.176	3	GR-B.1.1.176
Ontario CA	14570000	2020-11-01		GR	B.1.1.176	5	GR-B.1.1.176
Ontario CA	14570000	2020-12-01		GR	B.1.1.176	3	GR-B.1.1.176
all	2319719	2020-11-01		GR	B.1.1.186	1	GR-B.1.1.186
all	8419316	2020-10-01		GR	B.1.1.186	1	GR-B.1.1.186
all	8419316	2020-11-01		GR	B.1.1.186	3	GR-B.1.1.186
all	8419316	2020-12-01		GR	B.1.1.186	3	GR-B.1.1.186
Mid-Hudson	2319719	2020-11-01		GR	B.1.1.186	1	GR-B.1.1.186
New York City	8419316	2020-10-01		GR	B.1.1.186	1	GR-B.1.1.186
New York City	8419316	2020-11-01		GR	B.1.1.186	3	GR-B.1.1.186
New York City	8419316	2020-12-01		GR	B.1.1.186	3	GR-B.1.1.186
all	14570000	2020-09-01		GR	B.1.1.189	2	GR-B.1.1.189
Ontario CA	14570000	2020-09-01		GR	B.1.1.189	2	GR-B.1.1.189
all	2840341	2020-07-01		GR	B.1.1.192	1	GR-B.1.1.192
all	2840341	2020-08-01		GR	B.1.1.192	4	GR-B.1.1.192
all	2840341	2020-12-01		GR	B.1.1.192	1	GR-B.1.1.192
all	8419316	2020-08-01		GR	B.1.1.192	1	GR-B.1.1.192
all	8419316	2020-10-01		GR	B.1.1.192	1	GR-B.1.1.192
all	8419316	2020-11-01		GR	B.1.1.192	3	GR-B.1.1.192
all	8419316	2020-12-01		GR	B.1.1.192	5	GR-B.1.1.192
all	1382480	2020-08-01		GR	B.1.1.192	4	GR-B.1.1.192
all	1382480	2020-10-01		GR	B.1.1.192	3	GR-B.1.1.192
all	1382480	2020-11-01		GR	B.1.1.192	2	GR-B.1.1.192
Long Island	2840341	2020-07-01		GR	B.1.1.192	1	GR-B.1.1.192
Long Island	2840341	2020-08-01		GR	B.1.1.192	4	GR-B.1.1.192
Long Island	2840341	2020-12-01		GR	B.1.1.192	1	GR-B.1.1.192
New York City	8419316	2020-08-01		GR	B.1.1.192	1	GR-B.1.1.192
New York City	8419316	2020-10-01		GR	B.1.1.192	1	GR-B.1.1.192
New York City	8419316	2020-11-01		GR	B.1.1.192	3	GR-B.1.1.192
New York City	8419316	2020-12-01		GR	B.1.1.192	5	GR-B.1.1.192
Western New York	1382480	2020-08-01		GR	B.1.1.192	4	GR-B.1.1.192
Western New York	1382480	2020-10-01		GR	B.1.1.192	3	GR-B.1.1.192
Western New York	1382480	2020-11-01		GR	B.1.1.192	2	GR-B.1.1.192
all	1083201	2020-12-01		GR	B.1.1.207	1	GR-B.1.1.207
all	2840341	2020-09-01		GR	B.1.1.207	1	GR-B.1.1.207
all	2840341	2020-12-01		GR	B.1.1.207	2	GR-B.1.1.207
all	2319719	2020-11-01		GR	B.1.1.207	1	GR-B.1.1.207
all	2319719	2020-12-01		GR	B.1.1.207	1	GR-B.1.1.207
all	8419316	2020-10-01		GR	B.1.1.207	4	GR-B.1.1.207
all	8419316	2020-11-01		GR	B.1.1.207	6	GR-B.1.1.207
all	8419316	2020-12-01		GR	B.1.1.207	20	GR-B.1.1.207
Capital Region	1083201	2020-12-01		GR	B.1.1.207	1	GR-B.1.1.207
Long Island	2840341	2020-09-01		GR	B.1.1.207	1	GR-B.1.1.207
Long Island	2840341	2020-12-01		GR	B.1.1.207	2	GR-B.1.1.207
Mid-Hudson	2319719	2020-11-01		GR	B.1.1.207	1	GR-B.1.1.207
Mid-Hudson	2319719	2020-12-01		GR	B.1.1.207	1	GR-B.1.1.207
New York City	8419316	2020-10-01		GR	B.1.1.207	4	GR-B.1.1.207
New York City	8419316	2020-11-01		GR	B.1.1.207	6	GR-B.1.1.207
New York City	8419316	2020-12-01		GR	B.1.1.207	20	GR-B.1.1.207
all	14570000	2020-11-01		GR	B.1.1.216	5	GR-B.1.1.216
all	14570000	2020-12-01		GR	B.1.1.216	1	GR-B.1.1.216
Ontario CA	14570000	2020-11-01		GR	B.1.1.216	5	GR-B.1.1.216
Ontario CA	14570000	2020-12-01		GR	B.1.1.216	1	GR-B.1.1.216
all	14570000	2020-08-01		GR	B.1.1.218	1	GR-B.1.1.218
Ontario CA	14570000	2020-08-01		GR	B.1.1.218	1	GR-B.1.1.218
all	1083201	2020-12-01		GR	B.1.1.222	1	GR-B.1.1.222
all	2840341	2020-12-01		GR	B.1.1.222	1	GR-B.1.1.222
all	2319719	2020-10-01		GR	B.1.1.222	1	GR-B.1.1.222
all	8419316	2020-09-01		GR	B.1.1.222	2	GR-B.1.1.222
all	8419316	2020-10-01		GR	B.1.1.222	4	GR-B.1.1.222
all	8419316	2020-11-01		GR	B.1.1.222	13	GR-B.1.1.222
all	8419316	2020-12-01		GR	B.1.1.222	17	GR-B.1.1.222
all	1382480	2020-09-01		GR	B.1.1.222	4	GR-B.1.1.222
all	1382480	2020-10-01		GR	B.1.1.222	6	GR-B.1.1.222
all	1382480	2020-12-01		GR	B.1.1.222	5	GR-B.1.1.222
Capital Region	1083201	2020-12-01		GR	B.1.1.222	1	GR-B.1.1.222
Long Island	2840341	2020-12-01		GR	B.1.1.222	1	GR-B.1.1.222
Mid-Hudson	2319719	2020-10-01		GR	B.1.1.222	1	GR-B.1.1.222
New York City	8419316	2020-09-01		GR	B.1.1.222	2	GR-B.1.1.222
New York City	8419316	2020-10-01		GR	B.1.1.222	4	GR-B.1.1.222
New York City	8419316	2020-11-01		GR	B.1.1.222	13	GR-B.1.1.222
New York City	8419316	2020-12-01		GR	B.1.1.222	17	GR-B.1.1.222
Western New York	1382480	2020-09-01		GR	B.1.1.222	4	GR-B.1.1.222
Western New York	1382480	2020-10-01		GR	B.1.1.222	6	GR-B.1.1.222
Western New York	1382480	2020-12-01		GR	B.1.1.222	5	GR-B.1.1.222
all	486158	2020-07-01		GR	B.1.1.225	1	GR-B.1.1.225
all	8419316	2020-06-01		GR	B.1.1.225	1	GR-B.1.1.225
all	8419316	2020-07-01		GR	B.1.1.225	2	GR-B.1.1.225
all	8419316	2020-08-01		GR	B.1.1.225	1	GR-B.1.1.225
Mohawk Valley	486158	2020-07-01		GR	B.1.1.225	1	GR-B.1.1.225
New York City	8419316	2020-06-01		GR	B.1.1.225	1	GR-B.1.1.225
New York City	8419316	2020-07-01		GR	B.1.1.225	2	GR-B.1.1.225
New York City	8419316	2020-08-01		GR	B.1.1.225	1	GR-B.1.1.225
all	486158	2020-08-01		GR	B.1.1.226	4	GR-B.1.1.226
Mohawk Valley	486158	2020-08-01		GR	B.1.1.226	4	GR-B.1.1.226
all	1083201	2020-09-01		GR	B.1.1.231	3	GR-B.1.1.231
all	1083201	2020-10-01		GR	B.1.1.231	1	GR-B.1.1.231
all	1083201	2020-11-01		GR	B.1.1.231	1	GR-B.1.1.231
all	1083201	2020-12-01		GR	B.1.1.231	1	GR-B.1.1.231
all	2840341	2020-08-01		GR	B.1.1.231	1	GR-B.1.1.231
all	2840341	2020-12-01		GR	B.1.1.231	1	GR-B.1.1.231
all	2319719	2020-12-01		GR	B.1.1.231	1	GR-B.1.1.231
all	486158	2020-12-01		GR	B.1.1.231	1	GR-B.1.1.231
all	8419316	2020-04-01		GR	B.1.1.231	1	GR-B.1.1.231
all	8419316	2020-05-01		GR	B.1.1.231	4	GR-B.1.1.231
all	8419316	2020-07-01		GR	B.1.1.231	1	GR-B.1.1.231
all	8419316	2020-08-01		GR	B.1.1.231	8	GR-B.1.1.231
all	8419316	2020-09-01		GR	B.1.1.231	3	GR-B.1.1.231
all	8419316	2020-10-01		GR	B.1.1.231	8	GR-B.1.1.231
all	8419316	2020-11-01		GR	B.1.1.231	9	GR-B.1.1.231
all	8419316	2020-12-01		GR	B.1.1.231	11	GR-B.1.1.231
Capital Region	1083201	2020-09-01		GR	B.1.1.231	3	GR-B.1.1.231
Capital Region	1083201	2020-10-01		GR	B.1.1.231	1	GR-B.1.1.231
Capital Region	1083201	2020-11-01		GR	B.1.1.231	1	GR-B.1.1.231
Capital Region	1083201	2020-12-01		GR	B.1.1.231	1	GR-B.1.1.231
Long Island	2840341	2020-08-01		GR	B.1.1.231	1	GR-B.1.1.231
Long Island	2840341	2020-12-01		GR	B.1.1.231	1	GR-B.1.1.231
Mid-Hudson	2319719	2020-12-01		GR	B.1.1.231	1	GR-B.1.1.231
Mohawk Valley	486158	2020-12-01		GR	B.1.1.231	1	GR-B.1.1.231
New York City	8419316	2020-04-01		GR	B.1.1.231	1	GR-B.1.1.231
New York City	8419316	2020-05-01		GR	B.1.1.231	4	GR-B.1.1.231
New York City	8419316	2020-07-01		GR	B.1.1.231	1	GR-B.1.1.231
New York City	8419316	2020-08-01		GR	B.1.1.231	8	GR-B.1.1.231
New York City	8419316	2020-09-01		GR	B.1.1.231	3	GR-B.1.1.231
New York City	8419316	2020-10-01		GR	B.1.1.231	8	GR-B.1.1.231
New York City	8419316	2020-11-01		GR	B.1.1.231	9	GR-B.1.1.231
New York City	8419316	2020-12-01		GR	B.1.1.231	11	GR-B.1.1.231
all	8419316	2020-09-01		GR	B.1.1.243	2	GR-B.1.1.243
New York City	8419316	2020-09-01		GR	B.1.1.243	2	GR-B.1.1.243
all	2319719	2020-12-01		GR	B.1.1.25	1	GR-B.1.1.25
all	8419316	2020-08-01		GR	B.1.1.25	2	GR-B.1.1.25
all	8419316	2020-09-01		GR	B.1.1.25	3	GR-B.1.1.25
all	8419316	2020-10-01		GH	B.1.1.25	1	GH-B.1.1.25
all	8419316	2020-10-01		GR	B.1.1.25	40	GR-B.1.1.25
all	8419316	2020-11-01		GR	B.1.1.25	2	GR-B.1.1.25
all	8419316	2020-12-01		GR	B.1.1.25	12	GR-B.1.1.25
all	14570000	2020-11-01		GR	B.1.1.25	2	GR-B.1.1.25
all	14570000	2020-12-01		GR	B.1.1.25	4	GR-B.1.1.25
Mid-Hudson	2319719	2020-12-01		GR	B.1.1.25	1	GR-B.1.1.25
New York City	8419316	2020-08-01		GR	B.1.1.25	2	GR-B.1.1.25
New York City	8419316	2020-09-01		GR	B.1.1.25	3	GR-B.1.1.25
New York City	8419316	2020-10-01		GH	B.1.1.25	1	GH-B.1.1.25
New York City	8419316	2020-10-01		GR	B.1.1.25	40	GR-B.1.1.25
New York City	8419316	2020-11-01		GR	B.1.1.25	2	GR-B.1.1.25
New York City	8419316	2020-12-01		GR	B.1.1.25	12	GR-B.1.1.25
Ontario CA	14570000	2020-11-01		GR	B.1.1.25	2	GR-B.1.1.25
Ontario CA	14570000	2020-12-01		GR	B.1.1.25	4	GR-B.1.1.25
all	8419316	2020-12-01		GR	B.1.1.258	1	GR-B.1.1.258
New York City	8419316	2020-12-01		GR	B.1.1.258	1	GR-B.1.1.258
all	14570000	2020-08-01		GR	B.1.1.263	1	GR-B.1.1.263
Ontario CA	14570000	2020-08-01		GR	B.1.1.263	1	GR-B.1.1.263
all	1083201	2020-11-01		GR	B.1.1.265	1	GR-B.1.1.265
all	1083201	2020-12-01		GR	B.1.1.265	3	GR-B.1.1.265
all	2840341	2020-09-01		GR	B.1.1.265	1	GR-B.1.1.265
all	2840341	2020-12-01		GR	B.1.1.265	2	GR-B.1.1.265
all	8419316	2020-10-01		GR	B.1.1.265	3	GR-B.1.1.265
all	8419316	2020-11-01		GR	B.1.1.265	3	GR-B.1.1.265
all	8419316	2020-12-01		GR	B.1.1.265	24	GR-B.1.1.265
all	421361	2020-12-01		GR	B.1.1.265	1	GR-B.1.1.265
all	1382480	2020-07-01		GR	B.1.1.265	1	GR-B.1.1.265
all	1382480	2020-10-01		GR	B.1.1.265	1	GR-B.1.1.265
all	1382480	2020-12-01		GR	B.1.1.265	1	GR-B.1.1.265
Capital Region	1083201	2020-11-01		GR	B.1.1.265	1	GR-B.1.1.265
Capital Region	1083201	2020-12-01		GR	B.1.1.265	3	GR-B.1.1.265
Long Island	2840341	2020-09-01		GR	B.1.1.265	1	GR-B.1.1.265
Long Island	2840341	2020-12-01		GR	B.1.1.265	2	GR-B.1.1.265
New York City	8419316	2020-10-01		GR	B.1.1.265	3	GR-B.1.1.265
New York City	8419316	2020-11-01		GR	B.1.1.265	3	GR-B.1.1.265
New York City	8419316	2020-12-01		GR	B.1.1.265	24	GR-B.1.1.265
North Country	421361	2020-12-01		GR	B.1.1.265	1	GR-B.1.1.265
Western New York	1382480	2020-07-01		GR	B.1.1.265	1	GR-B.1.1.265
Western New York	1382480	2020-10-01		GR	B.1.1.265	1	GR-B.1.1.265
Western New York	1382480	2020-12-01		GR	B.1.1.265	1	GR-B.1.1.265
all	8419316	2020-12-01		GR	B.1.1.274	1	GR-B.1.1.274
New York City	8419316	2020-12-01		GR	B.1.1.274	1	GR-B.1.1.274
all	2840341	2020-12-01		GR	B.1.1.28	2	GR-B.1.1.28
all	8419316	2020-06-01		GR	B.1.1.28	3	GR-B.1.1.28
all	8419316	2020-12-01		GR	B.1.1.28	2	GR-B.1.1.28
Long Island	2840341	2020-12-01		GR	B.1.1.28	2	GR-B.1.1.28
New York City	8419316	2020-06-01		GR	B.1.1.28	3	GR-B.1.1.28
New York City	8419316	2020-12-01		GR	B.1.1.28	2	GR-B.1.1.28
all	8419316	2020-09-01		GR	B.1.1.291	1	GR-B.1.1.291
all	8419316	2020-12-01		GR	B.1.1.291	1	GR-B.1.1.291
all	14570000	2020-08-01		GR	B.1.1.291	1	GR-B.1.1.291
New York City	8419316	2020-09-01		GR	B.1.1.291	1	GR-B.1.1.291
New York City	8419316	2020-12-01		GR	B.1.1.291	1	GR-B.1.1.291
Ontario CA	14570000	2020-08-01		GR	B.1.1.291	1	GR-B.1.1.291
all	8419316	2020-11-01		GR	B.1.1.294	2	GR-B.1.1.294
New York City	8419316	2020-11-01		GR	B.1.1.294	2	GR-B.1.1.294
all	8419316	2020-07-01		GR	B.1.1.304	1	GR-B.1.1.304
all	8419316	2020-12-01		GR	B.1.1.304	1	GR-B.1.1.304
New York City	8419316	2020-07-01		GR	B.1.1.304	1	GR-B.1.1.304
New York City	8419316	2020-12-01		GR	B.1.1.304	1	GR-B.1.1.304
all	8419316	2020-10-01		GR	B.1.1.305	4	GR-B.1.1.305
New York City	8419316	2020-10-01		GR	B.1.1.305	4	GR-B.1.1.305
all	2840341	2020-12-01		GR	B.1.1.306	2	GR-B.1.1.306
all	14570000	2020-08-01		GR	B.1.1.306	1	GR-B.1.1.306
Long Island	2840341	2020-12-01		GR	B.1.1.306	2	GR-B.1.1.306
Ontario CA	14570000	2020-08-01		GR	B.1.1.306	1	GR-B.1.1.306
all	1083201	2020-12-01		GR	B.1.1.316	1	GR-B.1.1.316
all	8419316	2020-10-01		GR	B.1.1.316	1	GR-B.1.1.316
all	8419316	2020-11-01		GR	B.1.1.316	3	GR-B.1.1.316
all	8419316	2020-12-01		GR	B.1.1.316	9	GR-B.1.1.316
all	421361	2020-12-01		GR	B.1.1.316	3	GR-B.1.1.316
Capital Region	1083201	2020-12-01		GR	B.1.1.316	1	GR-B.1.1.316
New York City	8419316	2020-10-01		GR	B.1.1.316	1	GR-B.1.1.316
New York City	8419316	2020-11-01		GR	B.1.1.316	3	GR-B.1.1.316
New York City	8419316	2020-12-01		GR	B.1.1.316	9	GR-B.1.1.316
North Country	421361	2020-12-01		GR	B.1.1.316	3	GR-B.1.1.316
all	8419316	2020-11-01		GR	B.1.1.317	3	GR-B.1.1.317
New York City	8419316	2020-11-01		GR	B.1.1.317	3	GR-B.1.1.317
all	8419316	2020-11-01		GR	B.1.1.322	1	GR-B.1.1.322
New York City	8419316	2020-11-01		GR	B.1.1.322	1	GR-B.1.1.322
all	8419316	2020-07-01		GR	B.1.1.329	1	GR-B.1.1.329
all	8419316	2020-08-01		GR	B.1.1.329	4	GR-B.1.1.329
all	8419316	2020-09-01		GR	B.1.1.329	3	GR-B.1.1.329
all	8419316	2020-10-01		GR	B.1.1.329	4	GR-B.1.1.329
all	1382480	2020-10-01		GR	B.1.1.329	1	GR-B.1.1.329
all	14570000	2020-11-01		GR	B.1.1.329	1	GR-B.1.1.329
all	14570000	2020-12-01		GR	B.1.1.329	5	GR-B.1.1.329
New York City	8419316	2020-07-01		GR	B.1.1.329	1	GR-B.1.1.329
New York City	8419316	2020-08-01		GR	B.1.1.329	4	GR-B.1.1.329
New York City	8419316	2020-09-01		GR	B.1.1.329	3	GR-B.1.1.329
New York City	8419316	2020-10-01		GR	B.1.1.329	4	GR-B.1.1.329
Ontario CA	14570000	2020-11-01		GR	B.1.1.329	1	GR-B.1.1.329
Ontario CA	14570000	2020-12-01		GR	B.1.1.329	5	GR-B.1.1.329
Western New York	1382480	2020-10-01		GR	B.1.1.329	1	GR-B.1.1.329
all	486158	2020-11-01		GR	B.1.1.33	1	GR-B.1.1.33
all	8419316	2020-10-01		GR	B.1.1.33	2	GR-B.1.1.33
all	14570000	2020-04-01		GR	B.1.1.33	6	GR-B.1.1.33
all	14570000	2020-05-01		GR	B.1.1.33	2	GR-B.1.1.33
all	14570000	2020-06-01		GR	B.1.1.33	5	GR-B.1.1.33
all	14570000	2020-07-01		GR	B.1.1.33	9	GR-B.1.1.33
all	14570000	2020-11-01		GR	B.1.1.33	1	GR-B.1.1.33
Mohawk Valley	486158	2020-11-01		GR	B.1.1.33	1	GR-B.1.1.33
New York City	8419316	2020-10-01		GR	B.1.1.33	2	GR-B.1.1.33
Ontario CA	14570000	2020-04-01		GR	B.1.1.33	6	GR-B.1.1.33
Ontario CA	14570000	2020-05-01		GR	B.1.1.33	2	GR-B.1.1.33
Ontario CA	14570000	2020-06-01		GR	B.1.1.33	5	GR-B.1.1.33
Ontario CA	14570000	2020-07-01		GR	B.1.1.33	9	GR-B.1.1.33
Ontario CA	14570000	2020-11-01		GR	B.1.1.33	1	GR-B.1.1.33
all	2319719	2020-12-01		GR	B.1.1.337	1	GR-B.1.1.337
all	8419316	2020-10-01		GR	B.1.1.337	3	GR-B.1.1.337
all	8419316	2020-11-01		GR	B.1.1.337	3	GR-B.1.1.337
all	8419316	2020-12-01		GR	B.1.1.337	1	GR-B.1.1.337
Mid-Hudson	2319719	2020-12-01		GR	B.1.1.337	1	GR-B.1.1.337
New York City	8419316	2020-10-01		GR	B.1.1.337	3	GR-B.1.1.337
New York City	8419316	2020-11-01		GR	B.1.1.337	3	GR-B.1.1.337
New York City	8419316	2020-12-01		GR	B.1.1.337	1	GR-B.1.1.337
all	14570000	2020-11-01		GR	B.1.1.343	6	GR-B.1.1.343
all	14570000	2020-12-01		GR	B.1.1.343	4	GR-B.1.1.343
Ontario CA	14570000	2020-11-01		GR	B.1.1.343	6	GR-B.1.1.343
Ontario CA	14570000	2020-12-01		GR	B.1.1.343	4	GR-B.1.1.343
all	777706	2020-12-01		GR	B.1.1.345	2	GR-B.1.1.345
Central New York	777706	2020-12-01		GR	B.1.1.345	2	GR-B.1.1.345
all	2319719	2020-12-01		GR	B.1.1.348	1	GR-B.1.1.348
all	8419316	2020-10-01		GR	B.1.1.348	3	GR-B.1.1.348
all	8419316	2020-12-01		GR	B.1.1.348	8	GR-B.1.1.348
Mid-Hudson	2319719	2020-12-01		GR	B.1.1.348	1	GR-B.1.1.348
New York City	8419316	2020-10-01		GR	B.1.1.348	3	GR-B.1.1.348
New York City	8419316	2020-12-01		GR	B.1.1.348	8	GR-B.1.1.348
all	8419316	2020-12-01		GR	B.1.1.351	4	GR-B.1.1.351
New York City	8419316	2020-12-01		GR	B.1.1.351	4	GR-B.1.1.351
all	777706	2020-11-01		GR	B.1.1.368	1	GR-B.1.1.368
all	8419316	2020-10-01		GR	B.1.1.368	1	GR-B.1.1.368
all	8419316	2020-11-01		GR	B.1.1.368	3	GR-B.1.1.368
all	8419316	2020-12-01		GR	B.1.1.368	6	GR-B.1.1.368
all	14570000	2020-11-01		GR	B.1.1.368	3	GR-B.1.1.368
Central New York	777706	2020-11-01		GR	B.1.1.368	1	GR-B.1.1.368
New York City	8419316	2020-10-01		GR	B.1.1.368	1	GR-B.1.1.368
New York City	8419316	2020-11-01		GR	B.1.1.368	3	GR-B.1.1.368
New York City	8419316	2020-12-01		GR	B.1.1.368	6	GR-B.1.1.368
Ontario CA	14570000	2020-11-01		GR	B.1.1.368	3	GR-B.1.1.368
all	14570000	2020-04-01		GR	B.1.1.369	1	GR-B.1.1.369
Ontario CA	14570000	2020-04-01		GR	B.1.1.369	1	GR-B.1.1.369
all	8419316	2020-11-01		GR	B.1.1.37	1	GR-B.1.1.37
New York City	8419316	2020-11-01		GR	B.1.1.37	1	GR-B.1.1.37
all	8419316	2020-08-01		GR	B.1.1.376	5	GR-B.1.1.376
New York City	8419316	2020-08-01		GR	B.1.1.376	5	GR-B.1.1.376
all	2319719	2020-12-01		GR	B.1.1.39	6	GR-B.1.1.39
all	8419316	2020-12-01		GR	B.1.1.39	3	GR-B.1.1.39
all	14570000	2020-12-01		GR	B.1.1.39	1	GR-B.1.1.39
Mid-Hudson	2319719	2020-12-01		GR	B.1.1.39	6	GR-B.1.1.39
New York City	8419316	2020-12-01		GR	B.1.1.39	3	GR-B.1.1.39
Ontario CA	14570000	2020-12-01		GR	B.1.1.39	1	GR-B.1.1.39
all	8419316	2020-11-01		GR	B.1.1.404	1	GR-B.1.1.404
all	14570000	2020-09-01		GR	B.1.1.404	1	GR-B.1.1.404
New York City	8419316	2020-11-01		GR	B.1.1.404	1	GR-B.1.1.404
Ontario CA	14570000	2020-09-01		GR	B.1.1.404	1	GR-B.1.1.404
all	2840341	2020-12-01		GR	B.1.1.407	1	GR-B.1.1.407
Long Island	2840341	2020-12-01		GR	B.1.1.407	1	GR-B.1.1.407
all	8419316	2020-12-01		GR	B.1.1.409	3	GR-B.1.1.409
New York City	8419316	2020-12-01		GR	B.1.1.409	3	GR-B.1.1.409
all	8419316	2020-12-01		GR	B.1.1.411	4	GR-B.1.1.411
New York City	8419316	2020-12-01		GR	B.1.1.411	4	GR-B.1.1.411
all	14570000	2020-09-01		GR	B.1.1.413	1	GR-B.1.1.413
Ontario CA	14570000	2020-09-01		GR	B.1.1.413	1	GR-B.1.1.413
all	8419316	2020-10-01		GR	B.1.1.416	3	GR-B.1.1.416
all	8419316	2020-11-01		GR	B.1.1.416	9	GR-B.1.1.416
all	14570000	2020-12-01		GR	B.1.1.416	2	GR-B.1.1.416
New York City	8419316	2020-10-01		GR	B.1.1.416	3	GR-B.1.1.416
New York City	8419316	2020-11-01		GR	B.1.1.416	9	GR-B.1.1.416
Ontario CA	14570000	2020-12-01		GR	B.1.1.416	2	GR-B.1.1.416
all	14570000	2020-12-01		GR	B.1.1.417	9	GR-B.1.1.417
all	8419316	2020-12-01		GR	B.1.1.420	3	GR-B.1.1.420
New York City	8419316	2020-12-01		GR	B.1.1.420	3	GR-B.1.1.420
all	2319719	2020-12-01		GR	B.1.1.432	1	GR-B.1.1.432
all	8419316	2020-09-01		GR	B.1.1.432	5	GR-B.1.1.432
all	8419316	2020-10-01		GR	B.1.1.432	7	GR-B.1.1.432
all	8419316	2020-11-01		GR	B.1.1.432	1	GR-B.1.1.432
all	8419316	2020-12-01		GR	B.1.1.432	6	GR-B.1.1.432
all	1382480	2020-08-01		G	B.1.1.432	1	G-B.1.1.432
all	1382480	2020-08-01		GR	B.1.1.432	22	GR-B.1.1.432
Mid-Hudson	2319719	2020-12-01		GR	B.1.1.432	1	GR-B.1.1.432
New York City	8419316	2020-09-01		GR	B.1.1.432	5	GR-B.1.1.432
New York City	8419316	2020-10-01		GR	B.1.1.432	7	GR-B.1.1.432
New York City	8419316	2020-11-01		GR	B.1.1.432	1	GR-B.1.1.432
New York City	8419316	2020-12-01		GR	B.1.1.432	6	GR-B.1.1.432
Western New York	1382480	2020-08-01		G	B.1.1.432	1	G-B.1.1.432
Western New York	1382480	2020-08-01		GR	B.1.1.432	22	GR-B.1.1.432
all	8419316	2020-09-01		GR	B.1.1.437	1	GR-B.1.1.437
New York City	8419316	2020-09-01		GR	B.1.1.437	1	GR-B.1.1.437
all	1083201	2020-07-01		GR	B.1.1.441	2	GR-B.1.1.441
all	1083201	2020-09-01		GR	B.1.1.441	4	GR-B.1.1.441
Capital Region	1083201	2020-07-01		GR	B.1.1.441	2	GR-B.1.1.441
Capital Region	1083201	2020-09-01		GR	B.1.1.441	4	GR-B.1.1.441
all	8419316	2020-09-01		GR	B.1.1.46	1	GR-B.1.1.46
New York City	8419316	2020-09-01		GR	B.1.1.46	1	GR-B.1.1.46
all	1083201	2020-10-01		GR	B.1.1.461	1	GR-B.1.1.461
all	2319719	2020-12-01		GR	B.1.1.461	1	GR-B.1.1.461
all	8419316	2020-09-01		GR	B.1.1.461	1	GR-B.1.1.461
all	8419316	2020-10-01		GR	B.1.1.461	17	GR-B.1.1.461
all	8419316	2020-11-01		GR	B.1.1.461	23	GR-B.1.1.461
all	8419316	2020-12-01		GR	B.1.1.461	22	GR-B.1.1.461
Capital Region	1083201	2020-10-01		GR	B.1.1.461	1	GR-B.1.1.461
Mid-Hudson	2319719	2020-12-01		GR	B.1.1.461	1	GR-B.1.1.461
New York City	8419316	2020-09-01		GR	B.1.1.461	1	GR-B.1.1.461
New York City	8419316	2020-10-01		GR	B.1.1.461	17	GR-B.1.1.461
New York City	8419316	2020-11-01		GR	B.1.1.461	23	GR-B.1.1.461
New York City	8419316	2020-12-01		GR	B.1.1.461	22	GR-B.1.1.461
all	8419316	2020-10-01		GR	B.1.1.464	2	GR-B.1.1.464
all	8419316	2020-11-01		GR	B.1.1.464	2	GR-B.1.1.464
all	8419316	2020-12-01		GR	B.1.1.464	2	GR-B.1.1.464
all	1382480	2020-08-01		GR	B.1.1.464	4	GR-B.1.1.464
all	1382480	2020-09-01		GR	B.1.1.464	10	GR-B.1.1.464
all	1382480	2020-10-01		GR	B.1.1.464	1	GR-B.1.1.464
all	1382480	2020-11-01		GR	B.1.1.464	1	GR-B.1.1.464
all	1382480	2020-12-01		GR	B.1.1.464	7	GR-B.1.1.464
New York City	8419316	2020-10-01		GR	B.1.1.464	2	GR-B.1.1.464
New York City	8419316	2020-11-01		GR	B.1.1.464	2	GR-B.1.1.464
New York City	8419316	2020-12-01		GR	B.1.1.464	2	GR-B.1.1.464
Western New York	1382480	2020-08-01		GR	B.1.1.464	4	GR-B.1.1.464
Western New York	1382480	2020-09-01		GR	B.1.1.464	10	GR-B.1.1.464
Western New York	1382480	2020-10-01		GR	B.1.1.464	1	GR-B.1.1.464
Western New York	1382480	2020-11-01		GR	B.1.1.464	1	GR-B.1.1.464
Western New York	1382480	2020-12-01		GR	B.1.1.464	7	GR-B.1.1.464
all	2840341	2020-12-01		GR	B.1.1.467	1	GR-B.1.1.467
all	8419316	2020-10-01		GR	B.1.1.467	7	GR-B.1.1.467
all	8419316	2020-11-01		GR	B.1.1.467	7	GR-B.1.1.467
all	8419316	2020-12-01		GR	B.1.1.467	16	GR-B.1.1.467
Long Island	2840341	2020-12-01		GR	B.1.1.467	1	GR-B.1.1.467
New York City	8419316	2020-10-01		GR	B.1.1.467	7	GR-B.1.1.467
New York City	8419316	2020-11-01		GR	B.1.1.467	7	GR-B.1.1.467
New York City	8419316	2020-12-01		GR	B.1.1.467	16	GR-B.1.1.467
all	8419316	2020-12-01		GR	B.1.1.48	1	GR-B.1.1.48
New York City	8419316	2020-12-01		GR	B.1.1.48	1	GR-B.1.1.48
all	1205380	2020-07-01		GR	B.1.1.482	1	GR-B.1.1.482
all	486158	2020-07-01		GR	B.1.1.482	4	GR-B.1.1.482
all	486158	2020-08-01		GR	B.1.1.482	1	GR-B.1.1.482
all	421361	2020-06-01		GR	B.1.1.482	1	GR-B.1.1.482
Finger Lakes	1205380	2020-07-01		GR	B.1.1.482	1	GR-B.1.1.482
Mohawk Valley	486158	2020-07-01		GR	B.1.1.482	4	GR-B.1.1.482
Mohawk Valley	486158	2020-08-01		GR	B.1.1.482	1	GR-B.1.1.482
North Country	421361	2020-06-01		GR	B.1.1.482	1	GR-B.1.1.482
all	14570000	2020-04-01		GR	B.1.1.485	2	GR-B.1.1.485
Ontario CA	14570000	2020-04-01		GR	B.1.1.485	2	GR-B.1.1.485
all	2840341	2020-11-01		GR	B.1.1.486	2	GR-B.1.1.486
all	2840341	2020-12-01		GR	B.1.1.486	13	GR-B.1.1.486
all	2319719	2020-12-01		GR	B.1.1.486	15	GR-B.1.1.486
all	486158	2020-12-01		GR	B.1.1.486	1	GR-B.1.1.486
all	8419316	2020-08-01		GR	B.1.1.486	4	GR-B.1.1.486
all	8419316	2020-09-01		GR	B.1.1.486	4	GR-B.1.1.486
all	8419316	2020-10-01		GR	B.1.1.486	2	GR-B.1.1.486
all	8419316	2020-11-01		GR	B.1.1.486	34	GR-B.1.1.486
all	8419316	2020-12-01		GR	B.1.1.486	81	GR-B.1.1.486
Long Island	2840341	2020-11-01		GR	B.1.1.486	2	GR-B.1.1.486
Long Island	2840341	2020-12-01		GR	B.1.1.486	13	GR-B.1.1.486
Mid-Hudson	2319719	2020-12-01		GR	B.1.1.486	15	GR-B.1.1.486
Mohawk Valley	486158	2020-12-01		GR	B.1.1.486	1	GR-B.1.1.486
New York City	8419316	2020-08-01		GR	B.1.1.486	4	GR-B.1.1.486
New York City	8419316	2020-09-01		GR	B.1.1.486	4	GR-B.1.1.486
New York City	8419316	2020-10-01		GR	B.1.1.486	2	GR-B.1.1.486
New York City	8419316	2020-11-01		GR	B.1.1.486	34	GR-B.1.1.486
New York City	8419316	2020-12-01		GR	B.1.1.486	81	GR-B.1.1.486
all	8419316	2020-09-01		GR	B.1.1.50	1	GR-B.1.1.50
all	8419316	2020-10-01		GR	B.1.1.50	2	GR-B.1.1.50
New York City	8419316	2020-09-01		GR	B.1.1.50	1	GR-B.1.1.50
New York City	8419316	2020-10-01		GR	B.1.1.50	2	GR-B.1.1.50
all	1083201	2020-09-01		GR	B.1.1.515	1	GR-B.1.1.515
Capital Region	1083201	2020-09-01		GR	B.1.1.515	1	GR-B.1.1.515
all	1083201	2020-12-01		GR	B.1.1.518	1	GR-B.1.1.518
all	8419316	2020-12-01		GR	B.1.1.518	2	GR-B.1.1.518
Capital Region	1083201	2020-12-01		GR	B.1.1.518	1	GR-B.1.1.518
New York City	8419316	2020-12-01		GR	B.1.1.518	2	GR-B.1.1.518
all	2840341	2020-12-01		GR	B.1.1.519	3	GR-B.1.1.519
all	8419316	2020-12-01		GR	B.1.1.519	12	GR-B.1.1.519
all	14570000	2020-12-01		GR	B.1.1.519	1	GR-B.1.1.519
Long Island	2840341	2020-12-01		GR	B.1.1.519	3	GR-B.1.1.519
New York City	8419316	2020-12-01		GR	B.1.1.519	12	GR-B.1.1.519
Ontario CA	14570000	2020-12-01		GR	B.1.1.519	1	GR-B.1.1.519
all	8419316	2020-04-01		GR	B.1.1.61	3	GR-B.1.1.61
New York City	8419316	2020-04-01		GR	B.1.1.61	3	GR-B.1.1.61
all	14570000	2020-08-01		GR	B.1.1.63	1	GR-B.1.1.63
Ontario CA	14570000	2020-08-01		GR	B.1.1.63	1	GR-B.1.1.63
all	1083201	2020-12-01	VOC Alpha GRY (B.1.1.7+Q.*)	GRY	B.1.1.7	2	GRY-B.1.1.7
all	2840341	2020-12-01	VOC Alpha GRY (B.1.1.7+Q.*)	G	B.1.1.7	1	G-B.1.1.7
all	2840341	2020-12-01	VOC Alpha GRY (B.1.1.7+Q.*)	GRY	B.1.1.7	2	GRY-B.1.1.7
all	8419316	2020-06-01	VOC Alpha GRY (B.1.1.7+Q.*)	GR	B.1.1.7	1	GR-B.1.1.7
all	8419316	2020-12-01	VOC Alpha GRY (B.1.1.7+Q.*)	GRY	B.1.1.7	6	GRY-B.1.1.7
all	14570000	2020-11-01	VOC Alpha GRY (B.1.1.7+Q.*)	GRY	B.1.1.7	1	GRY-B.1.1.7
Capital Region	1083201	2020-12-01	VOC Alpha GRY (B.1.1.7+Q.*)	GRY	B.1.1.7	2	GRY-B.1.1.7
Long Island	2840341	2020-12-01	VOC Alpha GRY (B.1.1.7+Q.*)	G	B.1.1.7	1	G-B.1.1.7
Long Island	2840341	2020-12-01	VOC Alpha GRY (B.1.1.7+Q.*)	GRY	B.1.1.7	2	GRY-B.1.1.7
New York City	8419316	2020-06-01	VOC Alpha GRY (B.1.1.7+Q.*)	GR	B.1.1.7	1	GR-B.1.1.7
New York City	8419316	2020-12-01	VOC Alpha GRY (B.1.1.7+Q.*)	GRY	B.1.1.7	6	GRY-B.1.1.7
Ontario CA	14570000	2020-11-01	VOC Alpha GRY (B.1.1.7+Q.*)	GRY	B.1.1.7	1	GRY-B.1.1.7
all	8419316	2020-08-01		GR	B.1.1.70	1	GR-B.1.1.70
all	8419316	2020-10-01		GR	B.1.1.70	2	GR-B.1.1.70
all	8419316	2020-11-01		GR	B.1.1.70	5	GR-B.1.1.70
New York City	8419316	2020-08-01		GR	B.1.1.70	1	GR-B.1.1.70
New York City	8419316	2020-10-01		GR	B.1.1.70	2	GR-B.1.1.70
New York City	8419316	2020-11-01		GR	B.1.1.70	5	GR-B.1.1.70
all	8419316	2020-09-01		GR	B.1.1.72	1	GR-B.1.1.72
all	8419316	2020-10-01		GR	B.1.1.72	1	GR-B.1.1.72
New York City	8419316	2020-09-01		GR	B.1.1.72	1	GR-B.1.1.72
New York City	8419316	2020-10-01		GR	B.1.1.72	1	GR-B.1.1.72
all	2840341	2020-04-01		GR	B.1.1.8	1	GR-B.1.1.8
all	8419316	2020-04-01		GR	B.1.1.8	1	GR-B.1.1.8
all	8419316	2020-09-01		GR	B.1.1.8	3	GR-B.1.1.8
Long Island	2840341	2020-04-01		GR	B.1.1.8	1	GR-B.1.1.8
New York City	8419316	2020-04-01		GR	B.1.1.8	1	GR-B.1.1.8
New York City	8419316	2020-09-01		GR	B.1.1.8	3	GR-B.1.1.8
all	8419316	2020-10-01		GR	B.1.1.89	1	GR-B.1.1.89
New York City	8419316	2020-10-01		GR	B.1.1.89	1	GR-B.1.1.89
all	1083201	2020-04-01		GH	B.1.108	1	GH-B.1.108
all	2840341	2020-04-01		GH	B.1.108	1	GH-B.1.108
all	2319719	2020-04-01		GH	B.1.108	1	GH-B.1.108
all	8419316	2020-04-01		GH	B.1.108	22	GH-B.1.108
all	8419316	2020-05-01		GH	B.1.108	6	GH-B.1.108
all	8419316	2020-07-01		GH	B.1.108	2	GH-B.1.108
all	8419316	2020-08-01		GH	B.1.108	1	GH-B.1.108
Capital Region	1083201	2020-04-01		GH	B.1.108	1	GH-B.1.108
Long Island	2840341	2020-04-01		GH	B.1.108	1	GH-B.1.108
Mid-Hudson	2319719	2020-04-01		GH	B.1.108	1	GH-B.1.108
New York City	8419316	2020-04-01		GH	B.1.108	22	GH-B.1.108
New York City	8419316	2020-05-01		GH	B.1.108	6	GH-B.1.108
New York City	8419316	2020-07-01		GH	B.1.108	2	GH-B.1.108
New York City	8419316	2020-08-01		GH	B.1.108	1	GH-B.1.108
all	8419316	2020-08-01		GH	B.1.110.3	1	GH-B.1.110.3
all	8419316	2020-09-01		GH	B.1.110.3	1	GH-B.1.110.3
all	8419316	2020-10-01		GH	B.1.110.3	13	GH-B.1.110.3
all	8419316	2020-11-01		GH	B.1.110.3	16	GH-B.1.110.3
all	8419316	2020-12-01		GH	B.1.110.3	36	GH-B.1.110.3
all	1382480	2020-08-01		GH	B.1.110.3	1	GH-B.1.110.3
all	1382480	2020-10-01		GH	B.1.110.3	5	GH-B.1.110.3
all	1382480	2020-11-01		GH	B.1.110.3	11	GH-B.1.110.3
all	1382480	2020-12-01		GH	B.1.110.3	1	GH-B.1.110.3
all	14570000	2020-11-01		G	B.1.110.3	1	G-B.1.110.3
New York City	8419316	2020-08-01		GH	B.1.110.3	1	GH-B.1.110.3
New York City	8419316	2020-09-01		GH	B.1.110.3	1	GH-B.1.110.3
New York City	8419316	2020-10-01		GH	B.1.110.3	13	GH-B.1.110.3
New York City	8419316	2020-11-01		GH	B.1.110.3	16	GH-B.1.110.3
New York City	8419316	2020-12-01		GH	B.1.110.3	36	GH-B.1.110.3
Ontario CA	14570000	2020-11-01		G	B.1.110.3	1	G-B.1.110.3
Western New York	1382480	2020-08-01		GH	B.1.110.3	1	GH-B.1.110.3
Western New York	1382480	2020-10-01		GH	B.1.110.3	5	GH-B.1.110.3
Western New York	1382480	2020-11-01		GH	B.1.110.3	11	GH-B.1.110.3
Western New York	1382480	2020-12-01		GH	B.1.110.3	1	GH-B.1.110.3
all	8419316	2020-10-01		GH	B.1.111	4	GH-B.1.111
all	8419316	2020-11-01		GH	B.1.111	5	GH-B.1.111
all	8419316	2020-12-01		GH	B.1.111	8	GH-B.1.111
all	14570000	2020-11-01		GH	B.1.111	1	GH-B.1.111
all	14570000	2020-12-01		GH	B.1.111	1	GH-B.1.111
New York City	8419316	2020-10-01		GH	B.1.111	4	GH-B.1.111
New York City	8419316	2020-11-01		GH	B.1.111	5	GH-B.1.111
New York City	8419316	2020-12-01		GH	B.1.111	8	GH-B.1.111
Ontario CA	14570000	2020-11-01		GH	B.1.111	1	GH-B.1.111
Ontario CA	14570000	2020-12-01		GH	B.1.111	1	GH-B.1.111
all	2319719	2020-06-01		GH	B.1.112	2	GH-B.1.112
Mid-Hudson	2319719	2020-06-01		GH	B.1.112	2	GH-B.1.112
all	8419316	2020-09-01		GH	B.1.115	7	GH-B.1.115
all	8419316	2020-10-01		GH	B.1.115	2	GH-B.1.115
New York City	8419316	2020-09-01		GH	B.1.115	7	GH-B.1.115
New York City	8419316	2020-10-01		GH	B.1.115	2	GH-B.1.115
all	1382480	2020-08-01		GH	B.1.119	1	GH-B.1.119
Western New York	1382480	2020-08-01		GH	B.1.119	1	GH-B.1.119
all	14570000	2020-08-01		G	B.1.128	3	G-B.1.128
all	14570000	2020-09-01		G	B.1.128	1	G-B.1.128
all	14570000	2020-11-01		G	B.1.128	1	G-B.1.128
Ontario CA	14570000	2020-08-01		G	B.1.128	3	G-B.1.128
Ontario CA	14570000	2020-09-01		G	B.1.128	1	G-B.1.128
Ontario CA	14570000	2020-11-01		G	B.1.128	1	G-B.1.128
all	2319719	2020-06-01		G	B.1.139	1	G-B.1.139
all	8419316	2020-07-01		G	B.1.139	1	G-B.1.139
all	8419316	2020-11-01		G	B.1.139	1	G-B.1.139
Mid-Hudson	2319719	2020-06-01		G	B.1.139	1	G-B.1.139
New York City	8419316	2020-07-01		G	B.1.139	1	G-B.1.139
New York City	8419316	2020-11-01		G	B.1.139	1	G-B.1.139
all	14570000	2020-04-01		G	B.1.147	6	G-B.1.147
all	14570000	2020-05-01		G	B.1.147	23	G-B.1.147
all	14570000	2020-06-01		G	B.1.147	3	G-B.1.147
Ontario CA	14570000	2020-04-01		G	B.1.147	6	G-B.1.147
Ontario CA	14570000	2020-05-01		G	B.1.147	23	G-B.1.147
Ontario CA	14570000	2020-06-01		G	B.1.147	3	G-B.1.147
all	2840341	2020-11-01		GH	B.1.160	1	GH-B.1.160
all	8419316	2020-08-01		GH	B.1.160	1	GH-B.1.160
all	8419316	2020-09-01		GH	B.1.160	1	GH-B.1.160
all	8419316	2020-10-01		GH	B.1.160	2	GH-B.1.160
all	8419316	2020-11-01		GH	B.1.160	1	GH-B.1.160
all	8419316	2020-12-01		GH	B.1.160	2	GH-B.1.160
all	14570000	2020-10-01		GH	B.1.160	1	GH-B.1.160
all	14570000	2020-11-01		GH	B.1.160	9	GH-B.1.160
all	14570000	2020-12-01		GH	B.1.160	34	GH-B.1.160
Long Island	2840341	2020-11-01		GH	B.1.160	1	GH-B.1.160
New York City	8419316	2020-08-01		GH	B.1.160	1	GH-B.1.160
New York City	8419316	2020-09-01		GH	B.1.160	1	GH-B.1.160
New York City	8419316	2020-10-01		GH	B.1.160	2	GH-B.1.160
New York City	8419316	2020-11-01		GH	B.1.160	1	GH-B.1.160
New York City	8419316	2020-12-01		GH	B.1.160	2	GH-B.1.160
Ontario CA	14570000	2020-10-01		GH	B.1.160	1	GH-B.1.160
Ontario CA	14570000	2020-11-01		GH	B.1.160	9	GH-B.1.160
Ontario CA	14570000	2020-12-01		GH	B.1.160	34	GH-B.1.160
all	8419316	2020-11-01		GH	B.1.160.23	1	GH-B.1.160.23
New York City	8419316	2020-11-01		GH	B.1.160.23	1	GH-B.1.160.23
all	8419316	2020-11-01		GH	B.1.164	1	GH-B.1.164
New York City	8419316	2020-11-01		GH	B.1.164	1	GH-B.1.164
all	636657	2020-04-01		GH	B.1.166	2	GH-B.1.166
all	14570000	2020-04-01		GH	B.1.166	1	GH-B.1.166
Ontario CA	14570000	2020-04-01		GH	B.1.166	1	GH-B.1.166
Southern Tier	636657	2020-04-01		GH	B.1.166	2	GH-B.1.166
all	14570000	2020-04-01		GH	B.1.167	8	GH-B.1.167
all	14570000	2020-05-01		GH	B.1.167	1	GH-B.1.167
all	14570000	2020-06-01		GH	B.1.167	1	GH-B.1.167
Ontario CA	14570000	2020-04-01		GH	B.1.167	8	GH-B.1.167
Ontario CA	14570000	2020-05-01		GH	B.1.167	1	GH-B.1.167
Ontario CA	14570000	2020-06-01		GH	B.1.167	1	GH-B.1.167
all	8419316	2020-04-01		GH	B.1.170	1	GH-B.1.170
all	14570000	2020-11-01		GH	B.1.170	1	GH-B.1.170
New York City	8419316	2020-04-01		GH	B.1.170	1	GH-B.1.170
Ontario CA	14570000	2020-11-01		GH	B.1.170	1	GH-B.1.170
all	2840341	2020-12-01		GV	B.1.177	2	GV-B.1.177
all	8419316	2020-08-01		GV	B.1.177	2	GV-B.1.177
all	8419316	2020-09-01		GV	B.1.177	2	GV-B.1.177
all	8419316	2020-10-01		GV	B.1.177	3	GV-B.1.177
all	8419316	2020-11-01		G	B.1.177	1	G-B.1.177
all	8419316	2020-12-01		GH	B.1.177	2	GH-B.1.177
all	8419316	2020-12-01		GV	B.1.177	17	GV-B.1.177
Long Island	2840341	2020-12-01		GV	B.1.177	2	GV-B.1.177
New York City	8419316	2020-08-01		GV	B.1.177	2	GV-B.1.177
New York City	8419316	2020-09-01		GV	B.1.177	2	GV-B.1.177
New York City	8419316	2020-10-01		GV	B.1.177	3	GV-B.1.177
New York City	8419316	2020-11-01		G	B.1.177	1	G-B.1.177
New York City	8419316	2020-12-01		GH	B.1.177	2	GH-B.1.177
New York City	8419316	2020-12-01		GV	B.1.177	17	GV-B.1.177
all	14570000	2020-09-01		GV	B.1.177.23	1	GV-B.1.177.23
Ontario CA	14570000	2020-09-01		GV	B.1.177.23	1	GV-B.1.177.23
all	8419316	2020-11-01		GV	B.1.177.53	1	GV-B.1.177.53
New York City	8419316	2020-11-01		GV	B.1.177.53	1	GV-B.1.177.53
all	8419316	2020-11-01		GV	B.1.177.54	1	GV-B.1.177.54
New York City	8419316	2020-11-01		GV	B.1.177.54	1	GV-B.1.177.54
all	8419316	2020-12-01		GV	B.1.177.86	7	GV-B.1.177.86
New York City	8419316	2020-12-01		GV	B.1.177.86	7	GV-B.1.177.86
all	8419316	2020-12-01		G	B.1.189	3	G-B.1.189
New York City	8419316	2020-12-01		G	B.1.189	3	G-B.1.189
all	8419316	2020-11-01		G	B.1.221	1	G-B.1.221
New York City	8419316	2020-11-01		G	B.1.221	1	G-B.1.221
all	8419316	2020-11-01		G	B.1.232	1	G-B.1.232
New York City	8419316	2020-11-01		G	B.1.232	1	G-B.1.232
all	8419316	2020-10-01		G	B.1.236	1	G-B.1.236
New York City	8419316	2020-10-01		G	B.1.236	1	G-B.1.236
all	8419316	2020-09-01		G	B.1.239	2	G-B.1.239
all	8419316	2020-11-01		G	B.1.239	3	G-B.1.239
all	8419316	2020-12-01		G	B.1.239	1	G-B.1.239
New York City	8419316	2020-09-01		G	B.1.239	2	G-B.1.239
New York City	8419316	2020-11-01		G	B.1.239	3	G-B.1.239
New York City	8419316	2020-12-01		G	B.1.239	1	G-B.1.239
all	1083201	2020-11-01		G	B.1.240	1	G-B.1.240
all	1083201	2020-12-01		G	B.1.240	4	G-B.1.240
all	1205380	2020-10-01		G	B.1.240	4	G-B.1.240
all	1205380	2020-12-01		G	B.1.240	1	G-B.1.240
all	2840341	2020-12-01		G	B.1.240	1	G-B.1.240
all	2319719	2020-11-01		G	B.1.240	1	G-B.1.240
all	486158	2020-07-01		G	B.1.240	1	G-B.1.240
all	486158	2020-09-01		G	B.1.240	1	G-B.1.240
all	8419316	2020-07-01		G	B.1.240	2	G-B.1.240
all	8419316	2020-08-01		G	B.1.240	9	G-B.1.240
all	8419316	2020-09-01		G	B.1.240	13	G-B.1.240
all	8419316	2020-10-01		G	B.1.240	19	G-B.1.240
all	8419316	2020-11-01		G	B.1.240	12	G-B.1.240
all	8419316	2020-12-01		G	B.1.240	27	G-B.1.240
all	1382480	2020-08-01		G	B.1.240	1	G-B.1.240
all	1382480	2020-09-01		G	B.1.240	1	G-B.1.240
all	1382480	2020-10-01		G	B.1.240	2	G-B.1.240
Capital Region	1083201	2020-11-01		G	B.1.240	1	G-B.1.240
Capital Region	1083201	2020-12-01		G	B.1.240	4	G-B.1.240
Finger Lakes	1205380	2020-10-01		G	B.1.240	4	G-B.1.240
Finger Lakes	1205380	2020-12-01		G	B.1.240	1	G-B.1.240
Long Island	2840341	2020-12-01		G	B.1.240	1	G-B.1.240
Mid-Hudson	2319719	2020-11-01		G	B.1.240	1	G-B.1.240
Mohawk Valley	486158	2020-07-01		G	B.1.240	1	G-B.1.240
Mohawk Valley	486158	2020-09-01		G	B.1.240	1	G-B.1.240
New York City	8419316	2020-07-01		G	B.1.240	2	G-B.1.240
New York City	8419316	2020-08-01		G	B.1.240	9	G-B.1.240
New York City	8419316	2020-09-01		G	B.1.240	13	G-B.1.240
New York City	8419316	2020-10-01		G	B.1.240	19	G-B.1.240
New York City	8419316	2020-11-01		G	B.1.240	12	G-B.1.240
New York City	8419316	2020-12-01		G	B.1.240	27	G-B.1.240
Western New York	1382480	2020-08-01		G	B.1.240	1	G-B.1.240
Western New York	1382480	2020-09-01		G	B.1.240	1	G-B.1.240
Western New York	1382480	2020-10-01		G	B.1.240	2	G-B.1.240
all	8419316	2020-11-01		G	B.1.241	1	G-B.1.241
all	14570000	2020-10-01		G	B.1.241	1	G-B.1.241
New York City	8419316	2020-11-01		G	B.1.241	1	G-B.1.241
Ontario CA	14570000	2020-10-01		G	B.1.241	1	G-B.1.241
all	8419316	2020-04-01		GH	B.1.242	1	GH-B.1.242
New York City	8419316	2020-04-01		GH	B.1.242	1	GH-B.1.242
all	8419316	2020-12-01		G	B.1.256	1	G-B.1.256
all	8419316	2020-12-01		GH	B.1.256	1	GH-B.1.256
New York City	8419316	2020-12-01		G	B.1.256	1	G-B.1.256
New York City	8419316	2020-12-01		GH	B.1.256	1	GH-B.1.256
all	1083201	2020-09-01		G	B.1.258	1	G-B.1.258
all	8419316	2020-10-01		G	B.1.258	2	G-B.1.258
all	8419316	2020-11-01		G	B.1.258	1	G-B.1.258
all	8419316	2020-12-01		G	B.1.258	1	G-B.1.258
all	14570000	2020-12-01		G	B.1.258	1	G-B.1.258
Capital Region	1083201	2020-09-01		G	B.1.258	1	G-B.1.258
New York City	8419316	2020-10-01		G	B.1.258	2	G-B.1.258
New York City	8419316	2020-11-01		G	B.1.258	1	G-B.1.258
New York City	8419316	2020-12-01		G	B.1.258	1	G-B.1.258
Ontario CA	14570000	2020-12-01		G	B.1.258	1	G-B.1.258
all	8419316	2020-09-01		G	B.1.258.5	1	G-B.1.258.5
New York City	8419316	2020-09-01		G	B.1.258.5	1	G-B.1.258.5
all	8419316	2020-09-01		GH	B.1.265	1	GH-B.1.265
all	421361	2020-08-01		GH	B.1.265	19	GH-B.1.265
all	421361	2020-09-01		GH	B.1.265	7	GH-B.1.265
all	14570000	2020-08-01		GH	B.1.265	1	GH-B.1.265
all	14570000	2020-09-01		GH	B.1.265	4	GH-B.1.265
all	14570000	2020-10-01		GH	B.1.265	2	GH-B.1.265
all	14570000	2020-11-01		GH	B.1.265	13	GH-B.1.265
all	14570000	2020-12-01		GH	B.1.265	3	GH-B.1.265
New York City	8419316	2020-09-01		GH	B.1.265	1	GH-B.1.265
North Country	421361	2020-08-01		GH	B.1.265	19	GH-B.1.265
North Country	421361	2020-09-01		GH	B.1.265	7	GH-B.1.265
Ontario CA	14570000	2020-08-01		GH	B.1.265	1	GH-B.1.265
Ontario CA	14570000	2020-09-01		GH	B.1.265	4	GH-B.1.265
Ontario CA	14570000	2020-10-01		GH	B.1.265	2	GH-B.1.265
Ontario CA	14570000	2020-11-01		GH	B.1.265	13	GH-B.1.265
Ontario CA	14570000	2020-12-01		GH	B.1.265	3	GH-B.1.265
all	14570000	2020-04-01		GH	B.1.270	11	GH-B.1.270
all	14570000	2020-05-01		GH	B.1.270	5	GH-B.1.270
all	14570000	2020-06-01		GH	B.1.270	3	GH-B.1.270
Ontario CA	14570000	2020-04-01		GH	B.1.270	11	GH-B.1.270
Ontario CA	14570000	2020-05-01		GH	B.1.270	5	GH-B.1.270
Ontario CA	14570000	2020-06-01		GH	B.1.270	3	GH-B.1.270
all	14570000	2020-08-01		GH	B.1.279	2	GH-B.1.279
Ontario CA	14570000	2020-08-01		GH	B.1.279	2	GH-B.1.279
all	8419316	2020-07-01		GH	B.1.280	1	GH-B.1.280
all	8419316	2020-11-01		GH	B.1.280	2	GH-B.1.280
all	8419316	2020-12-01		GH	B.1.280	2	GH-B.1.280
all	1382480	2020-09-01		GH	B.1.280	5	GH-B.1.280
all	1382480	2020-10-01		GH	B.1.280	1	GH-B.1.280
all	1382480	2020-11-01		GH	B.1.280	34	GH-B.1.280
all	1382480	2020-12-01		GH	B.1.280	5	GH-B.1.280
New York City	8419316	2020-07-01		GH	B.1.280	1	GH-B.1.280
New York City	8419316	2020-11-01		GH	B.1.280	2	GH-B.1.280
New York City	8419316	2020-12-01		GH	B.1.280	2	GH-B.1.280
Western New York	1382480	2020-09-01		GH	B.1.280	5	GH-B.1.280
Western New York	1382480	2020-10-01		GH	B.1.280	1	GH-B.1.280
Western New York	1382480	2020-11-01		GH	B.1.280	34	GH-B.1.280
Western New York	1382480	2020-12-01		GH	B.1.280	5	GH-B.1.280
all	8419316	2020-04-01		GH	B.1.292	1	GH-B.1.292
New York City	8419316	2020-04-01		GH	B.1.292	1	GH-B.1.292
all	2319719	2020-09-01		GH	B.1.293	2	GH-B.1.293
all	486158	2020-08-01		GH	B.1.293	1	GH-B.1.293
all	486158	2020-09-01		GH	B.1.293	1	GH-B.1.293
all	8419316	2020-08-01		GH	B.1.293	2	GH-B.1.293
all	8419316	2020-09-01		GH	B.1.293	1	GH-B.1.293
all	8419316	2020-11-01		GH	B.1.293	1	GH-B.1.293
all	8419316	2020-12-01		GH	B.1.293	2	GH-B.1.293
Mid-Hudson	2319719	2020-09-01		GH	B.1.293	2	GH-B.1.293
Mohawk Valley	486158	2020-08-01		GH	B.1.293	1	GH-B.1.293
Mohawk Valley	486158	2020-09-01		GH	B.1.293	1	GH-B.1.293
New York City	8419316	2020-08-01		GH	B.1.293	2	GH-B.1.293
New York City	8419316	2020-09-01		GH	B.1.293	1	GH-B.1.293
New York City	8419316	2020-11-01		GH	B.1.293	1	GH-B.1.293
New York City	8419316	2020-12-01		GH	B.1.293	2	GH-B.1.293
all	1083201	2020-12-01		GH	B.1.298	1	GH-B.1.298
all	1205380	2020-12-01		GH	B.1.298	1	GH-B.1.298
all	8419316	2020-09-01		GH	B.1.298	1	GH-B.1.298
all	8419316	2020-10-01		GH	B.1.298	1	GH-B.1.298
all	8419316	2020-11-01		GH	B.1.298	5	GH-B.1.298
all	8419316	2020-12-01		G	B.1.298	1	G-B.1.298
all	8419316	2020-12-01		GH	B.1.298	6	GH-B.1.298
all	1382480	2020-05-01		GH	B.1.298	2	GH-B.1.298
Capital Region	1083201	2020-12-01		GH	B.1.298	1	GH-B.1.298
Finger Lakes	1205380	2020-12-01		GH	B.1.298	1	GH-B.1.298
New York City	8419316	2020-09-01		GH	B.1.298	1	GH-B.1.298
New York City	8419316	2020-10-01		GH	B.1.298	1	GH-B.1.298
New York City	8419316	2020-11-01		GH	B.1.298	5	GH-B.1.298
New York City	8419316	2020-12-01		G	B.1.298	1	G-B.1.298
New York City	8419316	2020-12-01		GH	B.1.298	6	GH-B.1.298
Western New York	1382480	2020-05-01		GH	B.1.298	2	GH-B.1.298
all	8419316	2020-10-01		GH	B.1.3	1	GH-B.1.3
all	8419316	2020-11-01		GH	B.1.3	5	GH-B.1.3
all	8419316	2020-12-01		GH	B.1.3	1	GH-B.1.3
all	1382480	2020-11-01		GH	B.1.3	1	GH-B.1.3
New York City	8419316	2020-10-01		GH	B.1.3	1	GH-B.1.3
New York City	8419316	2020-11-01		GH	B.1.3	5	GH-B.1.3
New York City	8419316	2020-12-01		GH	B.1.3	1	GH-B.1.3
Western New York	1382480	2020-11-01		GH	B.1.3	1	GH-B.1.3
all	8419316	2020-04-01		GH	B.1.302	6	GH-B.1.302
New York City	8419316	2020-04-01		GH	B.1.302	6	GH-B.1.302
all	1083201	2020-09-01		GH	B.1.306	1	GH-B.1.306
all	486158	2020-07-01		GH	B.1.306	2	GH-B.1.306
all	486158	2020-08-01		GH	B.1.306	1	GH-B.1.306
all	8419316	2020-10-01		GH	B.1.306	1	GH-B.1.306
all	8419316	2020-11-01		GH	B.1.306	3	GH-B.1.306
all	8419316	2020-12-01		GH	B.1.306	15	GH-B.1.306
all	636657	2020-11-01		GH	B.1.306	1	GH-B.1.306
all	1382480	2020-11-01		GH	B.1.306	2	GH-B.1.306
all	1382480	2020-12-01		GH	B.1.306	1	GH-B.1.306
Capital Region	1083201	2020-09-01		GH	B.1.306	1	GH-B.1.306
Mohawk Valley	486158	2020-07-01		GH	B.1.306	2	GH-B.1.306
Mohawk Valley	486158	2020-08-01		GH	B.1.306	1	GH-B.1.306
New York City	8419316	2020-10-01		GH	B.1.306	1	GH-B.1.306
New York City	8419316	2020-11-01		GH	B.1.306	3	GH-B.1.306
New York City	8419316	2020-12-01		GH	B.1.306	15	GH-B.1.306
Southern Tier	636657	2020-11-01		GH	B.1.306	1	GH-B.1.306
Western New York	1382480	2020-11-01		GH	B.1.306	2	GH-B.1.306
Western New York	1382480	2020-12-01		GH	B.1.306	1	GH-B.1.306
all	8419316	2020-06-01		GH	B.1.308	1	GH-B.1.308
New York City	8419316	2020-06-01		GH	B.1.308	1	GH-B.1.308
all	8419316	2020-10-01		GH	B.1.309	1	GH-B.1.309
New York City	8419316	2020-10-01		GH	B.1.309	1	GH-B.1.309
all	1083201	2020-11-01		GH	B.1.311	1	GH-B.1.311
all	1083201	2020-12-01		GH	B.1.311	3	GH-B.1.311
all	777706	2020-12-01		GH	B.1.311	2	GH-B.1.311
all	1205380	2020-12-01		GH	B.1.311	4	GH-B.1.311
all	2840341	2020-12-01		GH	B.1.311	2	GH-B.1.311
all	2319719	2020-12-01		GH	B.1.311	5	GH-B.1.311
all	486158	2020-10-01		GH	B.1.311	1	GH-B.1.311
all	486158	2020-11-01		GH	B.1.311	6	GH-B.1.311
all	486158	2020-12-01		GH	B.1.311	1	GH-B.1.311
all	8419316	2020-04-01		GH	B.1.311	1	GH-B.1.311
all	8419316	2020-10-01		GH	B.1.311	2	GH-B.1.311
all	8419316	2020-11-01		GH	B.1.311	8	GH-B.1.311
all	8419316	2020-12-01		GH	B.1.311	19	GH-B.1.311
all	421361	2020-12-01		GH	B.1.311	1	GH-B.1.311
all	636657	2020-12-01		GH	B.1.311	1	GH-B.1.311
all	1382480	2020-11-01		GH	B.1.311	1	GH-B.1.311
all	1382480	2020-12-01		GH	B.1.311	9	GH-B.1.311
all	14570000	2020-11-01		GH	B.1.311	1	GH-B.1.311
Capital Region	1083201	2020-11-01		GH	B.1.311	1	GH-B.1.311
Capital Region	1083201	2020-12-01		GH	B.1.311	3	GH-B.1.311
Central New York	777706	2020-12-01		GH	B.1.311	2	GH-B.1.311
Finger Lakes	1205380	2020-12-01		GH	B.1.311	4	GH-B.1.311
Long Island	2840341	2020-12-01		GH	B.1.311	2	GH-B.1.311
Mid-Hudson	2319719	2020-12-01		GH	B.1.311	5	GH-B.1.311
Mohawk Valley	486158	2020-10-01		GH	B.1.311	1	GH-B.1.311
Mohawk Valley	486158	2020-11-01		GH	B.1.311	6	GH-B.1.311
Mohawk Valley	486158	2020-12-01		GH	B.1.311	1	GH-B.1.311
New York City	8419316	2020-04-01		GH	B.1.311	1	GH-B.1.311
New York City	8419316	2020-10-01		GH	B.1.311	2	GH-B.1.311
New York City	8419316	2020-11-01		GH	B.1.311	8	GH-B.1.311
New York City	8419316	2020-12-01		GH	B.1.311	19	GH-B.1.311
North Country	421361	2020-12-01		GH	B.1.311	1	GH-B.1.311
Ontario CA	14570000	2020-11-01		GH	B.1.311	1	GH-B.1.311
Southern Tier	636657	2020-12-01		GH	B.1.311	1	GH-B.1.311
Western New York	1382480	2020-11-01		GH	B.1.311	1	GH-B.1.311
Western New York	1382480	2020-12-01		GH	B.1.311	9	GH-B.1.311
all	1382480	2020-07-01		GH	B.1.313	2	GH-B.1.313
Western New York	1382480	2020-07-01		GH	B.1.313	2	GH-B.1.313
all	1083201	2020-05-01		GH	B.1.314	1	GH-B.1.314
all	8419316	2020-04-01		GH	B.1.314	10	GH-B.1.314
all	8419316	2020-05-01		GH	B.1.314	2	GH-B.1.314
Capital Region	1083201	2020-05-01		GH	B.1.314	1	GH-B.1.314
New York City	8419316	2020-04-01		GH	B.1.314	10	GH-B.1.314
New York City	8419316	2020-05-01		GH	B.1.314	2	GH-B.1.314
all	14570000	2020-04-01		GH	B.1.316	1	GH-B.1.316
all	14570000	2020-05-01		GH	B.1.316	4	GH-B.1.316
all	14570000	2020-06-01		GH	B.1.316	2	GH-B.1.316
Ontario CA	14570000	2020-04-01		GH	B.1.316	1	GH-B.1.316
Ontario CA	14570000	2020-05-01		GH	B.1.316	4	GH-B.1.316
Ontario CA	14570000	2020-06-01		GH	B.1.316	2	GH-B.1.316
all	2319719	2020-11-01		GH	B.1.318	1	GH-B.1.318
Mid-Hudson	2319719	2020-11-01		GH	B.1.318	1	GH-B.1.318
all	2840341	2020-04-01		GH	B.1.319	1	GH-B.1.319
all	2319719	2020-04-01		GH	B.1.319	10	GH-B.1.319
all	2319719	2020-06-01		GH	B.1.319	1	GH-B.1.319
all	8419316	2020-04-01		GH	B.1.319	21	GH-B.1.319
all	8419316	2020-05-01		GH	B.1.319	7	GH-B.1.319
all	8419316	2020-06-01		GH	B.1.319	6	GH-B.1.319
all	8419316	2020-08-01		GH	B.1.319	1	GH-B.1.319
all	421361	2020-05-01		GH	B.1.319	1	GH-B.1.319
Long Island	2840341	2020-04-01		GH	B.1.319	1	GH-B.1.319
Mid-Hudson	2319719	2020-04-01		GH	B.1.319	10	GH-B.1.319
Mid-Hudson	2319719	2020-06-01		GH	B.1.319	1	GH-B.1.319
New York City	8419316	2020-04-01		GH	B.1.319	21	GH-B.1.319
New York City	8419316	2020-05-01		GH	B.1.319	7	GH-B.1.319
New York City	8419316	2020-06-01		GH	B.1.319	6	GH-B.1.319
New York City	8419316	2020-08-01		GH	B.1.319	1	GH-B.1.319
North Country	421361	2020-05-01		GH	B.1.319	1	GH-B.1.319
all	1083201	2020-12-01		GH	B.1.320	1	GH-B.1.320
all	2840341	2020-12-01		GH	B.1.320	1	GH-B.1.320
all	8419316	2020-10-01		GH	B.1.320	2	GH-B.1.320
all	8419316	2020-12-01		GH	B.1.320	4	GH-B.1.320
Capital Region	1083201	2020-12-01		GH	B.1.320	1	GH-B.1.320
Long Island	2840341	2020-12-01		GH	B.1.320	1	GH-B.1.320
New York City	8419316	2020-10-01		GH	B.1.320	2	GH-B.1.320
New York City	8419316	2020-12-01		GH	B.1.320	4	GH-B.1.320
all	8419316	2020-04-01		GH	B.1.323	1	GH-B.1.323
New York City	8419316	2020-04-01		GH	B.1.323	1	GH-B.1.323
all	1083201	2020-12-01		GH	B.1.324	1	GH-B.1.324
all	2840341	2020-11-01		GH	B.1.324	1	GH-B.1.324
all	2840341	2020-12-01		GH	B.1.324	3	GH-B.1.324
all	8419316	2020-10-01		GH	B.1.324	2	GH-B.1.324
all	8419316	2020-11-01		GH	B.1.324	2	GH-B.1.324
all	8419316	2020-12-01		GH	B.1.324	4	GH-B.1.324
all	1382480	2020-07-01		GH	B.1.324	1	GH-B.1.324
all	1382480	2020-12-01		GH	B.1.324	2	GH-B.1.324
Capital Region	1083201	2020-12-01		GH	B.1.324	1	GH-B.1.324
Long Island	2840341	2020-11-01		GH	B.1.324	1	GH-B.1.324
Long Island	2840341	2020-12-01		GH	B.1.324	3	GH-B.1.324
New York City	8419316	2020-10-01		GH	B.1.324	2	GH-B.1.324
New York City	8419316	2020-11-01		GH	B.1.324	2	GH-B.1.324
New York City	8419316	2020-12-01		GH	B.1.324	4	GH-B.1.324
Western New York	1382480	2020-07-01		GH	B.1.324	1	GH-B.1.324
Western New York	1382480	2020-12-01		GH	B.1.324	2	GH-B.1.324
all	2840341	2020-04-01		GH	B.1.332	4	GH-B.1.332
all	2319719	2020-04-01		GH	B.1.332	2	GH-B.1.332
all	486158	2020-04-01		GH	B.1.332	1	GH-B.1.332
all	8419316	2020-04-01		GH	B.1.332	24	GH-B.1.332
all	8419316	2020-05-01		GH	B.1.332	9	GH-B.1.332
Long Island	2840341	2020-04-01		GH	B.1.332	4	GH-B.1.332
Mid-Hudson	2319719	2020-04-01		GH	B.1.332	2	GH-B.1.332
Mohawk Valley	486158	2020-04-01		GH	B.1.332	1	GH-B.1.332
New York City	8419316	2020-04-01		GH	B.1.332	24	GH-B.1.332
New York City	8419316	2020-05-01		GH	B.1.332	9	GH-B.1.332
all	8419316	2020-05-01		GH	B.1.333	1	GH-B.1.333
New York City	8419316	2020-05-01		GH	B.1.333	1	GH-B.1.333
all	486158	2020-05-01		GH	B.1.334	1	GH-B.1.334
all	486158	2020-06-01		GH	B.1.334	11	GH-B.1.334
all	486158	2020-07-01		GH	B.1.334	23	GH-B.1.334
all	486158	2020-08-01		GH	B.1.334	1	GH-B.1.334
all	8419316	2020-04-01		GH	B.1.334	2	GH-B.1.334
Mohawk Valley	486158	2020-05-01		GH	B.1.334	1	GH-B.1.334
Mohawk Valley	486158	2020-06-01		GH	B.1.334	11	GH-B.1.334
Mohawk Valley	486158	2020-07-01		GH	B.1.334	23	GH-B.1.334
Mohawk Valley	486158	2020-08-01		GH	B.1.334	1	GH-B.1.334
New York City	8419316	2020-04-01		GH	B.1.334	2	GH-B.1.334
all	8419316	2020-05-01		GH	B.1.335	1	GH-B.1.335
New York City	8419316	2020-05-01		GH	B.1.335	1	GH-B.1.335
all	8419316	2020-09-01		GH	B.1.336	5	GH-B.1.336
all	8419316	2020-10-01		GH	B.1.336	8	GH-B.1.336
New York City	8419316	2020-09-01		GH	B.1.336	5	GH-B.1.336
New York City	8419316	2020-10-01		GH	B.1.336	8	GH-B.1.336
all	8419316	2020-12-01		GH	B.1.337	2	GH-B.1.337
New York City	8419316	2020-12-01		GH	B.1.337	2	GH-B.1.337
all	8419316	2020-04-01		GH	B.1.338	1	GH-B.1.338
New York City	8419316	2020-04-01		GH	B.1.338	1	GH-B.1.338
all	2840341	2020-07-01		GH	B.1.340	1	GH-B.1.340
all	8419316	2020-12-01		GH	B.1.340	1	GH-B.1.340
all	1382480	2020-07-01		GH	B.1.340	1	GH-B.1.340
all	1382480	2020-09-01		GH	B.1.340	1	GH-B.1.340
Long Island	2840341	2020-07-01		GH	B.1.340	1	GH-B.1.340
New York City	8419316	2020-12-01		GH	B.1.340	1	GH-B.1.340
Western New York	1382480	2020-07-01		GH	B.1.340	1	GH-B.1.340
Western New York	1382480	2020-09-01		GH	B.1.340	1	GH-B.1.340
all	8419316	2020-11-01		GH	B.1.346	1	GH-B.1.346
all	14570000	2020-11-01		GH	B.1.346	5	GH-B.1.346
all	14570000	2020-12-01		GH	B.1.346	27	GH-B.1.346
New York City	8419316	2020-11-01		GH	B.1.346	1	GH-B.1.346
Ontario CA	14570000	2020-11-01		GH	B.1.346	5	GH-B.1.346
Ontario CA	14570000	2020-12-01		GH	B.1.346	27	GH-B.1.346
all	14570000	2020-04-01		GH	B.1.350	18	GH-B.1.350
all	14570000	2020-05-01		GH	B.1.350	4	GH-B.1.350
all	14570000	2020-10-01		GH	B.1.350	1	GH-B.1.350
Ontario CA	14570000	2020-04-01		GH	B.1.350	18	GH-B.1.350
Ontario CA	14570000	2020-05-01		GH	B.1.350	4	GH-B.1.350
Ontario CA	14570000	2020-10-01		GH	B.1.350	1	GH-B.1.350
all	8419316	2020-04-01		GH	B.1.356	1	GH-B.1.356
New York City	8419316	2020-04-01		GH	B.1.356	1	GH-B.1.356
all	8419316	2020-05-01		GH	B.1.359	1	GH-B.1.359
New York City	8419316	2020-05-01		GH	B.1.359	1	GH-B.1.359
all	2840341	2020-09-01		GH	B.1.36	1	GH-B.1.36
all	2840341	2020-11-01		GH	B.1.36	1	GH-B.1.36
all	2840341	2020-12-01		GH	B.1.36	1	GH-B.1.36
all	8419316	2020-09-01		GH	B.1.36	1	GH-B.1.36
all	8419316	2020-10-01		GH	B.1.36	2	GH-B.1.36
all	8419316	2020-12-01		GH	B.1.36	2	GH-B.1.36
all	14570000	2020-06-01		GH	B.1.36	1	GH-B.1.36
all	14570000	2020-08-01		GH	B.1.36	4	GH-B.1.36
all	14570000	2020-09-01		GH	B.1.36	1	GH-B.1.36
all	14570000	2020-10-01		GH	B.1.36	2	GH-B.1.36
all	14570000	2020-11-01		GH	B.1.36	42	GH-B.1.36
all	14570000	2020-12-01		GH	B.1.36	14	GH-B.1.36
Long Island	2840341	2020-09-01		GH	B.1.36	1	GH-B.1.36
Long Island	2840341	2020-11-01		GH	B.1.36	1	GH-B.1.36
Long Island	2840341	2020-12-01		GH	B.1.36	1	GH-B.1.36
New York City	8419316	2020-09-01		GH	B.1.36	1	GH-B.1.36
New York City	8419316	2020-10-01		GH	B.1.36	2	GH-B.1.36
New York City	8419316	2020-12-01		GH	B.1.36	2	GH-B.1.36
Ontario CA	14570000	2020-06-01		GH	B.1.36	1	GH-B.1.36
Ontario CA	14570000	2020-08-01		GH	B.1.36	4	GH-B.1.36
Ontario CA	14570000	2020-09-01		GH	B.1.36	1	GH-B.1.36
Ontario CA	14570000	2020-10-01		GH	B.1.36	2	GH-B.1.36
Ontario CA	14570000	2020-11-01		GH	B.1.36	42	GH-B.1.36
Ontario CA	14570000	2020-12-01		GH	B.1.36	14	GH-B.1.36
all	8419316	2020-12-01		GH	B.1.36.10	1	GH-B.1.36.10
New York City	8419316	2020-12-01		GH	B.1.36.10	1	GH-B.1.36.10
all	8419316	2020-12-01		GH	B.1.36.29	1	GH-B.1.36.29
all	14570000	2020-11-01		GH	B.1.36.29	4	GH-B.1.36.29
New York City	8419316	2020-12-01		GH	B.1.36.29	1	GH-B.1.36.29
Ontario CA	14570000	2020-11-01		GH	B.1.36.29	4	GH-B.1.36.29
all	8419316	2020-12-01		GH	B.1.36.31	6	GH-B.1.36.31
all	14570000	2020-11-01		GH	B.1.36.31	7	GH-B.1.36.31
all	14570000	2020-12-01		GH	B.1.36.31	8	GH-B.1.36.31
New York City	8419316	2020-12-01		GH	B.1.36.31	6	GH-B.1.36.31
Ontario CA	14570000	2020-11-01		GH	B.1.36.31	7	GH-B.1.36.31
Ontario CA	14570000	2020-12-01		GH	B.1.36.31	8	GH-B.1.36.31
all	8419316	2020-12-01		GH	B.1.36.34	2	GH-B.1.36.34
all	14570000	2020-06-01		GH	B.1.36.34	1	GH-B.1.36.34
New York City	8419316	2020-12-01		GH	B.1.36.34	2	GH-B.1.36.34
Ontario CA	14570000	2020-06-01		GH	B.1.36.34	1	GH-B.1.36.34
all	14570000	2020-11-01		GH	B.1.36.36	1	GH-B.1.36.36
Ontario CA	14570000	2020-11-01		GH	B.1.36.36	1	GH-B.1.36.36
all	14570000	2020-09-01		GH	B.1.36.38	1	GH-B.1.36.38
all	14570000	2020-11-01		GH	B.1.36.38	90	GH-B.1.36.38
all	14570000	2020-12-01		GH	B.1.36.38	30	GH-B.1.36.38
Ontario CA	14570000	2020-09-01		GH	B.1.36.38	1	GH-B.1.36.38
Ontario CA	14570000	2020-11-01		GH	B.1.36.38	90	GH-B.1.36.38
Ontario CA	14570000	2020-12-01		GH	B.1.36.38	30	GH-B.1.36.38
all	1083201	2020-12-01		GH	B.1.36.8	1	GH-B.1.36.8
all	8419316	2020-12-01		GH	B.1.36.8	2	GH-B.1.36.8
all	14570000	2020-09-01		GH	B.1.36.8	1	GH-B.1.36.8
all	14570000	2020-10-01		GH	B.1.36.8	2	GH-B.1.36.8
all	14570000	2020-11-01		GH	B.1.36.8	15	GH-B.1.36.8
Capital Region	1083201	2020-12-01		GH	B.1.36.8	1	GH-B.1.36.8
New York City	8419316	2020-12-01		GH	B.1.36.8	2	GH-B.1.36.8
Ontario CA	14570000	2020-09-01		GH	B.1.36.8	1	GH-B.1.36.8
Ontario CA	14570000	2020-10-01		GH	B.1.36.8	2	GH-B.1.36.8
Ontario CA	14570000	2020-11-01		GH	B.1.36.8	15	GH-B.1.36.8
all	14570000	2020-12-01		GH	B.1.36.9	1	GH-B.1.36.9
Ontario CA	14570000	2020-12-01		GH	B.1.36.9	1	GH-B.1.36.9
all	8419316	2020-12-01		GH	B.1.360	1	GH-B.1.360
New York City	8419316	2020-12-01		GH	B.1.360	1	GH-B.1.360
all	777706	2020-12-01		GH	B.1.361	1	GH-B.1.361
all	1205380	2020-12-01		GH	B.1.361	15	GH-B.1.361
all	2319719	2020-12-01		GH	B.1.361	3	GH-B.1.361
all	8419316	2020-09-01		GH	B.1.361	3	GH-B.1.361
all	8419316	2020-10-01		GH	B.1.361	2	GH-B.1.361
all	8419316	2020-11-01		GH	B.1.361	3	GH-B.1.361
all	8419316	2020-12-01		GH	B.1.361	11	GH-B.1.361
all	1382480	2020-12-01		GH	B.1.361	1	GH-B.1.361
Central New York	777706	2020-12-01		GH	B.1.361	1	GH-B.1.361
Finger Lakes	1205380	2020-12-01		GH	B.1.361	15	GH-B.1.361
Mid-Hudson	2319719	2020-12-01		GH	B.1.361	3	GH-B.1.361
New York City	8419316	2020-09-01		GH	B.1.361	3	GH-B.1.361
New York City	8419316	2020-10-01		GH	B.1.361	2	GH-B.1.361
New York City	8419316	2020-11-01		GH	B.1.361	3	GH-B.1.361
New York City	8419316	2020-12-01		GH	B.1.361	11	GH-B.1.361
Western New York	1382480	2020-12-01		GH	B.1.361	1	GH-B.1.361
all	8419316	2020-12-01		GH	B.1.362	2	GH-B.1.362
New York City	8419316	2020-12-01		GH	B.1.362	2	GH-B.1.362
all	2840341	2020-12-01		GH	B.1.375	2	GH-B.1.375
all	2319719	2020-12-01		GH	B.1.375	4	GH-B.1.375
all	8419316	2020-11-01		GH	B.1.375	3	GH-B.1.375
all	8419316	2020-12-01		GH	B.1.375	11	GH-B.1.375
Long Island	2840341	2020-12-01		GH	B.1.375	2	GH-B.1.375
Mid-Hudson	2319719	2020-12-01		GH	B.1.375	4	GH-B.1.375
New York City	8419316	2020-11-01		GH	B.1.375	3	GH-B.1.375
New York City	8419316	2020-12-01		GH	B.1.375	11	GH-B.1.375
all	2840341	2020-04-01		G	B.1.383	1	G-B.1.383
all	8419316	2020-04-01		G	B.1.383	1	G-B.1.383
all	8419316	2020-07-01		G	B.1.383	1	G-B.1.383
Long Island	2840341	2020-04-01		G	B.1.383	1	G-B.1.383
New York City	8419316	2020-04-01		G	B.1.383	1	G-B.1.383
New York City	8419316	2020-07-01		G	B.1.383	1	G-B.1.383
all	486158	2020-06-01		G	B.1.384	2	G-B.1.384
Mohawk Valley	486158	2020-06-01		G	B.1.384	2	G-B.1.384
all	8419316	2020-10-01		GH	B.1.385	1	GH-B.1.385
New York City	8419316	2020-10-01		GH	B.1.385	1	GH-B.1.385
all	8419316	2020-10-01		G	B.1.390	2	G-B.1.390
all	8419316	2020-11-01		G	B.1.390	1	G-B.1.390
New York City	8419316	2020-10-01		G	B.1.390	2	G-B.1.390
New York City	8419316	2020-11-01		G	B.1.390	1	G-B.1.390
all	8419316	2020-09-01		G	B.1.396	1	G-B.1.396
all	8419316	2020-11-01		G	B.1.396	2	G-B.1.396
all	8419316	2020-12-01		G	B.1.396	2	G-B.1.396
all	14570000	2020-11-01		G	B.1.396	1	G-B.1.396
New York City	8419316	2020-09-01		G	B.1.396	1	G-B.1.396
New York City	8419316	2020-11-01		G	B.1.396	2	G-B.1.396
New York City	8419316	2020-12-01		G	B.1.396	2	G-B.1.396
Ontario CA	14570000	2020-11-01		G	B.1.396	1	G-B.1.396
all	8419316	2020-09-01		G	B.1.399	1	G-B.1.399
all	8419316	2020-11-01		G	B.1.399	1	G-B.1.399
New York City	8419316	2020-09-01		G	B.1.399	1	G-B.1.399
New York City	8419316	2020-11-01		G	B.1.399	1	G-B.1.399
all	2319719	2020-12-01		G	B.1.400	3	G-B.1.400
all	8419316	2020-09-01		G	B.1.400	1	G-B.1.400
all	8419316	2020-10-01		G	B.1.400	2	G-B.1.400
all	8419316	2020-11-01		G	B.1.400	1	G-B.1.400
all	8419316	2020-12-01		G	B.1.400	6	G-B.1.400
all	1382480	2020-12-01		G	B.1.400	4	G-B.1.400
Mid-Hudson	2319719	2020-12-01		G	B.1.400	3	G-B.1.400
New York City	8419316	2020-09-01		G	B.1.400	1	G-B.1.400
New York City	8419316	2020-10-01		G	B.1.400	2	G-B.1.400
New York City	8419316	2020-11-01		G	B.1.400	1	G-B.1.400
New York City	8419316	2020-12-01		G	B.1.400	6	G-B.1.400
Western New York	1382480	2020-12-01		G	B.1.400	4	G-B.1.400
all	8419316	2020-04-01		GH	B.1.413	9	GH-B.1.413
New York City	8419316	2020-04-01		GH	B.1.413	9	GH-B.1.413
all	14570000	2020-04-01		G	B.1.415	1	G-B.1.415
Ontario CA	14570000	2020-04-01		G	B.1.415	1	G-B.1.415
all	8419316	2020-11-01		G	B.1.420	1	G-B.1.420
New York City	8419316	2020-11-01		G	B.1.420	1	G-B.1.420
all	1382480	2020-08-01		GH	B.1.423	1	GH-B.1.423
Western New York	1382480	2020-08-01		GH	B.1.423	1	GH-B.1.423
all	8419316	2020-12-01		GH	B.1.425	1	GH-B.1.425
New York City	8419316	2020-12-01		GH	B.1.425	1	GH-B.1.425
all	8419316	2020-11-01		GH	B.1.426	1	GH-B.1.426
all	1382480	2020-09-01		GH	B.1.426	1	GH-B.1.426
New York City	8419316	2020-11-01		GH	B.1.426	1	GH-B.1.426
Western New York	1382480	2020-09-01		GH	B.1.426	1	GH-B.1.426
all	2840341	2020-12-01	VOI Epsilon GH/452R.V1 (B.1.429+B.1.427)	GH	B.1.427	1	GH-B.1.427
all	8419316	2020-12-01	VOI Epsilon GH/452R.V1 (B.1.429+B.1.427)	GH	B.1.427	9	GH-B.1.427
Long Island	2840341	2020-12-01	VOI Epsilon GH/452R.V1 (B.1.429+B.1.427)	GH	B.1.427	1	GH-B.1.427
New York City	8419316	2020-12-01	VOI Epsilon GH/452R.V1 (B.1.429+B.1.427)	GH	B.1.427	9	GH-B.1.427
all	2840341	2020-12-01	VOI Epsilon GH/452R.V1 (B.1.429+B.1.427)	GH	B.1.429	4	GH-B.1.429
all	2319719	2020-12-01	VOI Epsilon GH/452R.V1 (B.1.429+B.1.427)	GH	B.1.429	2	GH-B.1.429
all	8419316	2020-11-01	VOI Epsilon GH/452R.V1 (B.1.429+B.1.427)	GH	B.1.429	4	GH-B.1.429
all	8419316	2020-12-01	VOI Epsilon GH/452R.V1 (B.1.429+B.1.427)	GH	B.1.429	41	GH-B.1.429
Long Island	2840341	2020-12-01	VOI Epsilon GH/452R.V1 (B.1.429+B.1.427)	GH	B.1.429	4	GH-B.1.429
Mid-Hudson	2319719	2020-12-01	VOI Epsilon GH/452R.V1 (B.1.429+B.1.427)	GH	B.1.429	2	GH-B.1.429
New York City	8419316	2020-11-01	VOI Epsilon GH/452R.V1 (B.1.429+B.1.427)	GH	B.1.429	4	GH-B.1.429
New York City	8419316	2020-12-01	VOI Epsilon GH/452R.V1 (B.1.429+B.1.427)	GH	B.1.429	41	GH-B.1.429
all	2319719	2020-12-01		GH	B.1.433	1	GH-B.1.433
all	8419316	2020-10-01		GH	B.1.433	1	GH-B.1.433
all	8419316	2020-11-01		GH	B.1.433	3	GH-B.1.433
all	8419316	2020-12-01		GH	B.1.433	22	GH-B.1.433
Mid-Hudson	2319719	2020-12-01		GH	B.1.433	1	GH-B.1.433
New York City	8419316	2020-10-01		GH	B.1.433	1	GH-B.1.433
New York City	8419316	2020-11-01		GH	B.1.433	3	GH-B.1.433
New York City	8419316	2020-12-01		GH	B.1.433	22	GH-B.1.433
all	1083201	2020-09-01		GH	B.1.436	2	GH-B.1.436
all	486158	2020-09-01		GH	B.1.436	1	GH-B.1.436
all	8419316	2020-09-01		GH	B.1.436	2	GH-B.1.436
all	1382480	2020-08-01		GH	B.1.436	1	GH-B.1.436
all	1382480	2020-09-01		GH	B.1.436	1	GH-B.1.436
Capital Region	1083201	2020-09-01		GH	B.1.436	2	GH-B.1.436
Mohawk Valley	486158	2020-09-01		GH	B.1.436	1	GH-B.1.436
New York City	8419316	2020-09-01		GH	B.1.436	2	GH-B.1.436
Western New York	1382480	2020-08-01		GH	B.1.436	1	GH-B.1.436
Western New York	1382480	2020-09-01		GH	B.1.436	1	GH-B.1.436
all	14570000	2020-11-01		GH	B.1.438.1	14	GH-B.1.438.1
all	14570000	2020-12-01		GH	B.1.438.1	27	GH-B.1.438.1
Ontario CA	14570000	2020-11-01		GH	B.1.438.1	14	GH-B.1.438.1
Ontario CA	14570000	2020-12-01		GH	B.1.438.1	27	GH-B.1.438.1
all	8419316	2020-12-01		G	B.1.438.4	1	G-B.1.438.4
New York City	8419316	2020-12-01		G	B.1.438.4	1	G-B.1.438.4
all	8419316	2020-04-01		GH	B.1.439	4	GH-B.1.439
New York City	8419316	2020-04-01		GH	B.1.439	4	GH-B.1.439
all	8419316	2020-04-01		GH	B.1.448	1	GH-B.1.448
all	8419316	2020-11-01		GH	B.1.448	1	GH-B.1.448
all	8419316	2020-12-01		GH	B.1.448	2	GH-B.1.448
New York City	8419316	2020-04-01		GH	B.1.448	1	GH-B.1.448
New York City	8419316	2020-11-01		GH	B.1.448	1	GH-B.1.448
New York City	8419316	2020-12-01		GH	B.1.448	2	GH-B.1.448
all	8419316	2020-08-01		GH	B.1.451	1	GH-B.1.451
all	1382480	2020-08-01		GH	B.1.451	1	GH-B.1.451
New York City	8419316	2020-08-01		GH	B.1.451	1	GH-B.1.451
Western New York	1382480	2020-08-01		GH	B.1.451	1	GH-B.1.451
all	14570000	2020-12-01		GH	B.1.469	2	GH-B.1.469
Ontario CA	14570000	2020-12-01		GH	B.1.469	2	GH-B.1.469
all	8419316	2020-12-01		GH	B.1.471	1	GH-B.1.471
all	14570000	2020-11-01		GH	B.1.471	3	GH-B.1.471
New York City	8419316	2020-12-01		GH	B.1.471	1	GH-B.1.471
Ontario CA	14570000	2020-11-01		GH	B.1.471	3	GH-B.1.471
all	8419316	2020-09-01		GH	B.1.478	4	GH-B.1.478
all	8419316	2020-10-01		GH	B.1.478	1	GH-B.1.478
all	8419316	2020-11-01		GH	B.1.478	3	GH-B.1.478
all	8419316	2020-12-01		GH	B.1.478	2	GH-B.1.478
New York City	8419316	2020-09-01		GH	B.1.478	4	GH-B.1.478
New York City	8419316	2020-10-01		GH	B.1.478	1	GH-B.1.478
New York City	8419316	2020-11-01		GH	B.1.478	3	GH-B.1.478
New York City	8419316	2020-12-01		GH	B.1.478	2	GH-B.1.478
all	8419316	2020-05-01		GH	B.1.499	1	GH-B.1.499
New York City	8419316	2020-05-01		GH	B.1.499	1	GH-B.1.499
all	2840341	2020-12-01		GH	B.1.499.1	1	GH-B.1.499.1
Long Island	2840341	2020-12-01		GH	B.1.499.1	1	GH-B.1.499.1
all	8419316	2020-07-01		GH	B.1.500	1	GH-B.1.500
New York City	8419316	2020-07-01		GH	B.1.500	1	GH-B.1.500
all	8419316	2020-05-01		GH	B.1.503	1	GH-B.1.503
all	8419316	2020-12-01		GH	B.1.503	1	GH-B.1.503
New York City	8419316	2020-05-01		GH	B.1.503	1	GH-B.1.503
New York City	8419316	2020-12-01		GH	B.1.503	1	GH-B.1.503
all	777706	2020-06-01		GH	B.1.506	2	GH-B.1.506
all	777706	2020-07-01		GH	B.1.506	1	GH-B.1.506
all	486158	2020-06-01		GH	B.1.506	13	GH-B.1.506
all	486158	2020-07-01		GH	B.1.506	9	GH-B.1.506
all	486158	2020-08-01		GH	B.1.506	3	GH-B.1.506
all	8419316	2020-04-01		GH	B.1.506	2	GH-B.1.506
Central New York	777706	2020-06-01		GH	B.1.506	2	GH-B.1.506
Central New York	777706	2020-07-01		GH	B.1.506	1	GH-B.1.506
Mohawk Valley	486158	2020-06-01		GH	B.1.506	13	GH-B.1.506
Mohawk Valley	486158	2020-07-01		GH	B.1.506	9	GH-B.1.506
Mohawk Valley	486158	2020-08-01		GH	B.1.506	3	GH-B.1.506
New York City	8419316	2020-04-01		GH	B.1.506	2	GH-B.1.506
all	2840341	2020-04-01		GH	B.1.507	1	GH-B.1.507
all	8419316	2020-04-01		GH	B.1.507	5	GH-B.1.507
all	8419316	2020-05-01		GH	B.1.507	4	GH-B.1.507
Long Island	2840341	2020-04-01		GH	B.1.507	1	GH-B.1.507
New York City	8419316	2020-04-01		GH	B.1.507	5	GH-B.1.507
New York City	8419316	2020-05-01		GH	B.1.507	4	GH-B.1.507
all	1083201	2020-09-01		GH	B.1.509	6	GH-B.1.509
all	1083201	2020-10-01		GH	B.1.509	1	GH-B.1.509
all	2840341	2020-12-01		GH	B.1.509	1	GH-B.1.509
all	486158	2020-11-01		GH	B.1.509	1	GH-B.1.509
all	8419316	2020-06-01		GH	B.1.509	1	GH-B.1.509
all	8419316	2020-07-01		GH	B.1.509	5	GH-B.1.509
all	8419316	2020-08-01		GH	B.1.509	3	GH-B.1.509
all	8419316	2020-09-01		GH	B.1.509	11	GH-B.1.509
all	8419316	2020-10-01		GH	B.1.509	19	GH-B.1.509
all	8419316	2020-11-01		GH	B.1.509	1	GH-B.1.509
all	8419316	2020-12-01		GH	B.1.509	3	GH-B.1.509
all	1382480	2020-07-01		GH	B.1.509	3	GH-B.1.509
all	1382480	2020-08-01		GH	B.1.509	12	GH-B.1.509
all	1382480	2020-09-01		GH	B.1.509	17	GH-B.1.509
all	14570000	2020-07-01		GH	B.1.509	1	GH-B.1.509
all	14570000	2020-09-01		GH	B.1.509	1	GH-B.1.509
Capital Region	1083201	2020-09-01		GH	B.1.509	6	GH-B.1.509
Capital Region	1083201	2020-10-01		GH	B.1.509	1	GH-B.1.509
Long Island	2840341	2020-12-01		GH	B.1.509	1	GH-B.1.509
Mohawk Valley	486158	2020-11-01		GH	B.1.509	1	GH-B.1.509
New York City	8419316	2020-06-01		GH	B.1.509	1	GH-B.1.509
New York City	8419316	2020-07-01		GH	B.1.509	5	GH-B.1.509
New York City	8419316	2020-08-01		GH	B.1.509	3	GH-B.1.509
New York City	8419316	2020-09-01		GH	B.1.509	11	GH-B.1.509
New York City	8419316	2020-10-01		GH	B.1.509	19	GH-B.1.509
New York City	8419316	2020-11-01		GH	B.1.509	1	GH-B.1.509
New York City	8419316	2020-12-01		GH	B.1.509	3	GH-B.1.509
Ontario CA	14570000	2020-07-01		GH	B.1.509	1	GH-B.1.509
Ontario CA	14570000	2020-09-01		GH	B.1.509	1	GH-B.1.509
Western New York	1382480	2020-07-01		GH	B.1.509	3	GH-B.1.509
Western New York	1382480	2020-08-01		GH	B.1.509	12	GH-B.1.509
Western New York	1382480	2020-09-01		GH	B.1.509	17	GH-B.1.509
all	8419316	2020-04-01		GH	B.1.520	1	GH-B.1.520
New York City	8419316	2020-04-01		GH	B.1.520	1	GH-B.1.520
all	8419316	2020-07-01		GH	B.1.521	2	GH-B.1.521
New York City	8419316	2020-07-01		GH	B.1.521	2	GH-B.1.521
all	8419316	2020-12-01		GH	B.1.523	1	GH-B.1.523
all	14570000	2020-09-01		GH	B.1.523	47	GH-B.1.523
all	14570000	2020-10-01		GH	B.1.523	15	GH-B.1.523
all	14570000	2020-11-01		GH	B.1.523	9	GH-B.1.523
all	14570000	2020-12-01		GH	B.1.523	4	GH-B.1.523
New York City	8419316	2020-12-01		GH	B.1.523	1	GH-B.1.523
Ontario CA	14570000	2020-09-01		GH	B.1.523	47	GH-B.1.523
Ontario CA	14570000	2020-10-01		GH	B.1.523	15	GH-B.1.523
Ontario CA	14570000	2020-11-01		GH	B.1.523	9	GH-B.1.523
Ontario CA	14570000	2020-12-01		GH	B.1.523	4	GH-B.1.523
all	8419316	2020-12-01	VOI Eta G/484K.V3 (B.1.525)	G	B.1.525	2	G-B.1.525
all	14570000	2020-12-01	VOI Eta G/484K.V3 (B.1.525)	G	B.1.525	5	G-B.1.525
New York City	8419316	2020-12-01	VOI Eta G/484K.V3 (B.1.525)	G	B.1.525	2	G-B.1.525
Ontario CA	14570000	2020-12-01	VOI Eta G/484K.V3 (B.1.525)	G	B.1.525	5	G-B.1.525
all	2840341	2020-12-01	VOI Iota GH/253G.V1 (B.1.526)	GH	B.1.526	1	GH-B.1.526
all	2319719	2020-12-01	VOI Iota GH/253G.V1 (B.1.526)	GH	B.1.526	6	GH-B.1.526
all	8419316	2020-11-01	VOI Iota GH/253G.V1 (B.1.526)	GH	B.1.526	3	GH-B.1.526
all	8419316	2020-12-01	VOI Iota GH/253G.V1 (B.1.526)	GH	B.1.526	59	GH-B.1.526
Long Island	2840341	2020-12-01	VOI Iota GH/253G.V1 (B.1.526)	GH	B.1.526	1	GH-B.1.526
Mid-Hudson	2319719	2020-12-01	VOI Iota GH/253G.V1 (B.1.526)	GH	B.1.526	6	GH-B.1.526
New York City	8419316	2020-11-01	VOI Iota GH/253G.V1 (B.1.526)	GH	B.1.526	3	GH-B.1.526
New York City	8419316	2020-12-01	VOI Iota GH/253G.V1 (B.1.526)	GH	B.1.526	59	GH-B.1.526
all	8419316	2020-10-01		G	B.1.527	1	G-B.1.527
New York City	8419316	2020-10-01		G	B.1.527	1	G-B.1.527
all	8419316	2020-11-01		G	B.1.539	2	G-B.1.539
all	8419316	2020-12-01		G	B.1.539	1	G-B.1.539
New York City	8419316	2020-11-01		G	B.1.539	2	G-B.1.539
New York City	8419316	2020-12-01		G	B.1.539	1	G-B.1.539
all	1083201	2020-11-01		GH	B.1.541	1	GH-B.1.541
all	1205380	2020-12-01		GH	B.1.541	1	GH-B.1.541
all	8419316	2020-11-01		GH	B.1.541	1	GH-B.1.541
all	1382480	2020-10-01		GH	B.1.541	2	GH-B.1.541
all	1382480	2020-11-01		GH	B.1.541	13	GH-B.1.541
all	1382480	2020-12-01		GH	B.1.541	20	GH-B.1.541
Capital Region	1083201	2020-11-01		GH	B.1.541	1	GH-B.1.541
Finger Lakes	1205380	2020-12-01		GH	B.1.541	1	GH-B.1.541
New York City	8419316	2020-11-01		GH	B.1.541	1	GH-B.1.541
Western New York	1382480	2020-10-01		GH	B.1.541	2	GH-B.1.541
Western New York	1382480	2020-11-01		GH	B.1.541	13	GH-B.1.541
Western New York	1382480	2020-12-01		GH	B.1.541	20	GH-B.1.541
all	2840341	2020-12-01		G	B.1.543	1	G-B.1.543
all	2319719	2020-12-01		G	B.1.543	1	G-B.1.543
all	8419316	2020-08-01		G	B.1.543	1	G-B.1.543
all	8419316	2020-11-01		G	B.1.543	6	G-B.1.543
all	8419316	2020-12-01		G	B.1.543	18	G-B.1.543
Long Island	2840341	2020-12-01		G	B.1.543	1	G-B.1.543
Mid-Hudson	2319719	2020-12-01		G	B.1.543	1	G-B.1.543
New York City	8419316	2020-08-01		G	B.1.543	1	G-B.1.543
New York City	8419316	2020-11-01		G	B.1.543	6	G-B.1.543
New York City	8419316	2020-12-01		G	B.1.543	18	G-B.1.543
all	8419316	2020-11-01		GH	B.1.544	2	GH-B.1.544
all	8419316	2020-12-01		GH	B.1.544	5	GH-B.1.544
New York City	8419316	2020-11-01		GH	B.1.544	2	GH-B.1.544
New York City	8419316	2020-12-01		GH	B.1.544	5	GH-B.1.544
all	1382480	2020-12-01		G	B.1.551	1	G-B.1.551
Western New York	1382480	2020-12-01		G	B.1.551	1	G-B.1.551
all	14570000	2020-04-01		G	B.1.552	1	G-B.1.552
Ontario CA	14570000	2020-04-01		G	B.1.552	1	G-B.1.552
all	8419316	2020-07-01		GH	B.1.555	2	GH-B.1.555
New York City	8419316	2020-07-01		GH	B.1.555	2	GH-B.1.555
all	1205380	2020-12-01		G	B.1.556	2	G-B.1.556
all	1382480	2020-11-01		G	B.1.556	4	G-B.1.556
all	1382480	2020-12-01		G	B.1.556	15	G-B.1.556
Finger Lakes	1205380	2020-12-01		G	B.1.556	2	G-B.1.556
Western New York	1382480	2020-11-01		G	B.1.556	4	G-B.1.556
Western New York	1382480	2020-12-01		G	B.1.556	15	G-B.1.556
all	8419316	2020-12-01		G	B.1.558	1	G-B.1.558
New York City	8419316	2020-12-01		G	B.1.558	1	G-B.1.558
all	8419316	2020-11-01		G	B.1.561	1	G-B.1.561
all	8419316	2020-12-01		G	B.1.561	6	G-B.1.561
New York City	8419316	2020-11-01		G	B.1.561	1	G-B.1.561
New York City	8419316	2020-12-01		G	B.1.561	6	G-B.1.561
all	1083201	2020-12-01		GH	B.1.563	2	GH-B.1.563
all	2840341	2020-12-01		GH	B.1.563	2	GH-B.1.563
all	8419316	2020-12-01		GH	B.1.563	4	GH-B.1.563
Capital Region	1083201	2020-12-01		GH	B.1.563	2	GH-B.1.563
Long Island	2840341	2020-12-01		GH	B.1.563	2	GH-B.1.563
New York City	8419316	2020-12-01		GH	B.1.563	4	GH-B.1.563
all	2840341	2020-08-01		GH	B.1.564	1	GH-B.1.564
all	2840341	2020-09-01		GH	B.1.564	1	GH-B.1.564
all	2840341	2020-11-01		GH	B.1.564	1	GH-B.1.564
all	2319719	2020-09-01		GH	B.1.564	1	GH-B.1.564
all	2319719	2020-12-01		GH	B.1.564	2	GH-B.1.564
all	8419316	2020-07-01		GH	B.1.564	1	GH-B.1.564
all	8419316	2020-08-01		GH	B.1.564	2	GH-B.1.564
all	8419316	2020-09-01		GH	B.1.564	4	GH-B.1.564
all	8419316	2020-10-01		GH	B.1.564	11	GH-B.1.564
all	8419316	2020-11-01		GH	B.1.564	6	GH-B.1.564
all	8419316	2020-12-01		GH	B.1.564	6	GH-B.1.564
all	421361	2020-12-01		GH	B.1.564	1	GH-B.1.564
Long Island	2840341	2020-08-01		GH	B.1.564	1	GH-B.1.564
Long Island	2840341	2020-09-01		GH	B.1.564	1	GH-B.1.564
Long Island	2840341	2020-11-01		GH	B.1.564	1	GH-B.1.564
Mid-Hudson	2319719	2020-09-01		GH	B.1.564	1	GH-B.1.564
Mid-Hudson	2319719	2020-12-01		GH	B.1.564	2	GH-B.1.564
New York City	8419316	2020-07-01		GH	B.1.564	1	GH-B.1.564
New York City	8419316	2020-08-01		GH	B.1.564	2	GH-B.1.564
New York City	8419316	2020-09-01		GH	B.1.564	4	GH-B.1.564
New York City	8419316	2020-10-01		GH	B.1.564	11	GH-B.1.564
New York City	8419316	2020-11-01		GH	B.1.564	6	GH-B.1.564
New York City	8419316	2020-12-01		GH	B.1.564	6	GH-B.1.564
North Country	421361	2020-12-01		GH	B.1.564	1	GH-B.1.564
all	8419316	2020-09-01		G	B.1.565	2	G-B.1.565
all	8419316	2020-10-01		G	B.1.565	3	G-B.1.565
all	8419316	2020-11-01		G	B.1.565	3	G-B.1.565
all	8419316	2020-12-01		G	B.1.565	5	G-B.1.565
New York City	8419316	2020-09-01		G	B.1.565	2	G-B.1.565
New York City	8419316	2020-10-01		G	B.1.565	3	G-B.1.565
New York City	8419316	2020-11-01		G	B.1.565	3	G-B.1.565
New York City	8419316	2020-12-01		G	B.1.565	5	G-B.1.565
all	8419316	2020-04-01		GH	B.1.566	1	GH-B.1.566
New York City	8419316	2020-04-01		GH	B.1.566	1	GH-B.1.566
all	2319719	2020-12-01		GH	B.1.567	1	GH-B.1.567
all	636657	2020-04-01		GH	B.1.567	1	GH-B.1.567
all	1382480	2020-05-01		GH	B.1.567	1	GH-B.1.567
Mid-Hudson	2319719	2020-12-01		GH	B.1.567	1	GH-B.1.567
Southern Tier	636657	2020-04-01		GH	B.1.567	1	GH-B.1.567
Western New York	1382480	2020-05-01		GH	B.1.567	1	GH-B.1.567
all	421361	2020-12-01		GH	B.1.568	1	GH-B.1.568
North Country	421361	2020-12-01		GH	B.1.568	1	GH-B.1.568
all	14570000	2020-11-01		GH	B.1.570	5	GH-B.1.570
Ontario CA	14570000	2020-11-01		GH	B.1.570	5	GH-B.1.570
all	2840341	2020-12-01		GH	B.1.575	1	GH-B.1.575
all	2319719	2020-12-01		GH	B.1.575	3	GH-B.1.575
all	8419316	2020-12-01		G	B.1.575	1	G-B.1.575
all	8419316	2020-12-01		GH	B.1.575	44	GH-B.1.575
Long Island	2840341	2020-12-01		GH	B.1.575	1	GH-B.1.575
Mid-Hudson	2319719	2020-12-01		GH	B.1.575	3	GH-B.1.575
New York City	8419316	2020-12-01		G	B.1.575	1	G-B.1.575
New York City	8419316	2020-12-01		GH	B.1.575	44	GH-B.1.575
all	2840341	2020-12-01		GH	B.1.576	2	GH-B.1.576
all	486158	2020-07-01		GH	B.1.576	2	GH-B.1.576
all	8419316	2020-04-01		GH	B.1.576	1	GH-B.1.576
all	8419316	2020-06-01		GH	B.1.576	1	GH-B.1.576
all	8419316	2020-07-01		GH	B.1.576	1	GH-B.1.576
all	8419316	2020-08-01		GH	B.1.576	1	GH-B.1.576
all	8419316	2020-09-01		GH	B.1.576	4	GH-B.1.576
all	8419316	2020-10-01		GH	B.1.576	1	GH-B.1.576
all	8419316	2020-12-01		GH	B.1.576	1	GH-B.1.576
all	636657	2020-09-01		GH	B.1.576	18	GH-B.1.576
all	1382480	2020-07-01		GH	B.1.576	2	GH-B.1.576
all	14570000	2020-11-01		GH	B.1.576	1	GH-B.1.576
Long Island	2840341	2020-12-01		GH	B.1.576	2	GH-B.1.576
Mohawk Valley	486158	2020-07-01		GH	B.1.576	2	GH-B.1.576
New York City	8419316	2020-04-01		GH	B.1.576	1	GH-B.1.576
New York City	8419316	2020-06-01		GH	B.1.576	1	GH-B.1.576
New York City	8419316	2020-07-01		GH	B.1.576	1	GH-B.1.576
New York City	8419316	2020-08-01		GH	B.1.576	1	GH-B.1.576
New York City	8419316	2020-09-01		GH	B.1.576	4	GH-B.1.576
New York City	8419316	2020-10-01		GH	B.1.576	1	GH-B.1.576
New York City	8419316	2020-12-01		GH	B.1.576	1	GH-B.1.576
Ontario CA	14570000	2020-11-01		GH	B.1.576	1	GH-B.1.576
Southern Tier	636657	2020-09-01		GH	B.1.576	18	GH-B.1.576
Western New York	1382480	2020-07-01		GH	B.1.576	2	GH-B.1.576
all	8419316	2020-11-01		GH	B.1.577	1	GH-B.1.577
New York City	8419316	2020-11-01		GH	B.1.577	1	GH-B.1.577
all	8419316	2020-12-01		GH	B.1.578	1	GH-B.1.578
all	1382480	2020-09-01		GH	B.1.578	2	GH-B.1.578
New York City	8419316	2020-12-01		GH	B.1.578	1	GH-B.1.578
Western New York	1382480	2020-09-01		GH	B.1.578	2	GH-B.1.578
all	1083201	2020-09-01		GH	B.1.582	1	GH-B.1.582
all	1083201	2020-10-01		GH	B.1.582	1	GH-B.1.582
all	1205380	2020-12-01		GH	B.1.582	1	GH-B.1.582
all	8419316	2020-07-01		GH	B.1.582	1	GH-B.1.582
all	8419316	2020-08-01		GH	B.1.582	1	GH-B.1.582
all	8419316	2020-11-01		GH	B.1.582	2	GH-B.1.582
all	8419316	2020-12-01		GH	B.1.582	7	GH-B.1.582
all	1382480	2020-10-01		GH	B.1.582	1	GH-B.1.582
all	1382480	2020-11-01		GH	B.1.582	2	GH-B.1.582
all	1382480	2020-12-01		GH	B.1.582	5	GH-B.1.582
Capital Region	1083201	2020-09-01		GH	B.1.582	1	GH-B.1.582
Capital Region	1083201	2020-10-01		GH	B.1.582	1	GH-B.1.582
Finger Lakes	1205380	2020-12-01		GH	B.1.582	1	GH-B.1.582
New York City	8419316	2020-07-01		GH	B.1.582	1	GH-B.1.582
New York City	8419316	2020-08-01		GH	B.1.582	1	GH-B.1.582
New York City	8419316	2020-11-01		GH	B.1.582	2	GH-B.1.582
New York City	8419316	2020-12-01		GH	B.1.582	7	GH-B.1.582
Western New York	1382480	2020-10-01		GH	B.1.582	1	GH-B.1.582
Western New York	1382480	2020-11-01		GH	B.1.582	2	GH-B.1.582
Western New York	1382480	2020-12-01		GH	B.1.582	5	GH-B.1.582
all	2840341	2020-12-01		GH	B.1.585	1	GH-B.1.585
all	8419316	2020-11-01		GH	B.1.585	1	GH-B.1.585
all	8419316	2020-12-01		GH	B.1.585	17	GH-B.1.585
Long Island	2840341	2020-12-01		GH	B.1.585	1	GH-B.1.585
New York City	8419316	2020-11-01		GH	B.1.585	1	GH-B.1.585
New York City	8419316	2020-12-01		GH	B.1.585	17	GH-B.1.585
all	1205380	2020-04-01		GH	B.1.586	1	GH-B.1.586
all	1205380	2020-05-01		GH	B.1.586	1	GH-B.1.586
all	1382480	2020-05-01		GH	B.1.586	1	GH-B.1.586
Finger Lakes	1205380	2020-04-01		GH	B.1.586	1	GH-B.1.586
Finger Lakes	1205380	2020-05-01		GH	B.1.586	1	GH-B.1.586
Western New York	1382480	2020-05-01		GH	B.1.586	1	GH-B.1.586
all	1083201	2020-12-01		GH	B.1.588	2	GH-B.1.588
all	777706	2020-12-01		GH	B.1.588	1	GH-B.1.588
all	2840341	2020-11-01		GH	B.1.588	1	GH-B.1.588
all	2840341	2020-12-01		GH	B.1.588	20	GH-B.1.588
all	2319719	2020-11-01		GH	B.1.588	1	GH-B.1.588
all	2319719	2020-12-01		GH	B.1.588	9	GH-B.1.588
all	8419316	2020-10-01		GH	B.1.588	4	GH-B.1.588
all	8419316	2020-11-01		GH	B.1.588	24	GH-B.1.588
all	8419316	2020-12-01		GH	B.1.588	59	GH-B.1.588
all	1382480	2020-12-01		GH	B.1.588	3	GH-B.1.588
Capital Region	1083201	2020-12-01		GH	B.1.588	2	GH-B.1.588
Central New York	777706	2020-12-01		GH	B.1.588	1	GH-B.1.588
Long Island	2840341	2020-11-01		GH	B.1.588	1	GH-B.1.588
Long Island	2840341	2020-12-01		GH	B.1.588	20	GH-B.1.588
Mid-Hudson	2319719	2020-11-01		GH	B.1.588	1	GH-B.1.588
Mid-Hudson	2319719	2020-12-01		GH	B.1.588	9	GH-B.1.588
New York City	8419316	2020-10-01		GH	B.1.588	4	GH-B.1.588
New York City	8419316	2020-11-01		GH	B.1.588	24	GH-B.1.588
New York City	8419316	2020-12-01		GH	B.1.588	59	GH-B.1.588
Western New York	1382480	2020-12-01		GH	B.1.588	3	GH-B.1.588
all	8419316	2020-09-01		GH	B.1.593	1	GH-B.1.593
New York City	8419316	2020-09-01		GH	B.1.593	1	GH-B.1.593
all	777706	2020-06-01		GH	B.1.595	1	GH-B.1.595
all	1205380	2020-12-01		GH	B.1.595	1	GH-B.1.595
all	8419316	2020-08-01		GH	B.1.595	1	GH-B.1.595
all	8419316	2020-09-01		GH	B.1.595	3	GH-B.1.595
all	8419316	2020-10-01		GH	B.1.595	2	GH-B.1.595
all	8419316	2020-11-01		GH	B.1.595	4	GH-B.1.595
all	8419316	2020-12-01		GH	B.1.595	4	GH-B.1.595
all	421361	2020-04-01		GH	B.1.595	5	GH-B.1.595
all	1382480	2020-08-01		GH	B.1.595	1	GH-B.1.595
all	1382480	2020-09-01		GH	B.1.595	1	GH-B.1.595
all	1382480	2020-11-01		GH	B.1.595	5	GH-B.1.595
all	1382480	2020-12-01		GH	B.1.595	2	GH-B.1.595
all	14570000	2020-04-01		GH	B.1.595	1	GH-B.1.595
all	14570000	2020-12-01		GH	B.1.595	1	GH-B.1.595
Central New York	777706	2020-06-01		GH	B.1.595	1	GH-B.1.595
Finger Lakes	1205380	2020-12-01		GH	B.1.595	1	GH-B.1.595
New York City	8419316	2020-08-01		GH	B.1.595	1	GH-B.1.595
New York City	8419316	2020-09-01		GH	B.1.595	3	GH-B.1.595
New York City	8419316	2020-10-01		GH	B.1.595	2	GH-B.1.595
New York City	8419316	2020-11-01		GH	B.1.595	4	GH-B.1.595
New York City	8419316	2020-12-01		GH	B.1.595	4	GH-B.1.595
North Country	421361	2020-04-01		GH	B.1.595	5	GH-B.1.595
Ontario CA	14570000	2020-04-01		GH	B.1.595	1	GH-B.1.595
Ontario CA	14570000	2020-12-01		GH	B.1.595	1	GH-B.1.595
Western New York	1382480	2020-08-01		GH	B.1.595	1	GH-B.1.595
Western New York	1382480	2020-09-01		GH	B.1.595	1	GH-B.1.595
Western New York	1382480	2020-11-01		GH	B.1.595	5	GH-B.1.595
Western New York	1382480	2020-12-01		GH	B.1.595	2	GH-B.1.595
all	1083201	2020-10-01		GH	B.1.595.1	1	GH-B.1.595.1
all	8419316	2020-07-01		GH	B.1.595.1	1	GH-B.1.595.1
all	8419316	2020-10-01		GH	B.1.595.1	2	GH-B.1.595.1
all	1382480	2020-07-01		GH	B.1.595.1	5	GH-B.1.595.1
all	1382480	2020-08-01		GH	B.1.595.1	2	GH-B.1.595.1
Capital Region	1083201	2020-10-01		GH	B.1.595.1	1	GH-B.1.595.1
New York City	8419316	2020-07-01		GH	B.1.595.1	1	GH-B.1.595.1
New York City	8419316	2020-10-01		GH	B.1.595.1	2	GH-B.1.595.1
Western New York	1382480	2020-07-01		GH	B.1.595.1	5	GH-B.1.595.1
Western New York	1382480	2020-08-01		GH	B.1.595.1	2	GH-B.1.595.1
all	8419316	2020-09-01		GH	B.1.595.3	1	GH-B.1.595.3
all	1382480	2020-08-01		GH	B.1.595.3	1	GH-B.1.595.3
New York City	8419316	2020-09-01		GH	B.1.595.3	1	GH-B.1.595.3
Western New York	1382480	2020-08-01		GH	B.1.595.3	1	GH-B.1.595.3
all	1083201	2020-12-01		GH	B.1.596	9	GH-B.1.596
all	2319719	2020-12-01		GH	B.1.596	2	GH-B.1.596
all	8419316	2020-10-01		GH	B.1.596	3	GH-B.1.596
all	8419316	2020-11-01		GH	B.1.596	7	GH-B.1.596
all	8419316	2020-12-01		GH	B.1.596	26	GH-B.1.596
all	8419316	2020-12-01		GR	B.1.596	1	GR-B.1.596
all	421361	2020-12-01		GH	B.1.596	1	GH-B.1.596
all	14570000	2020-11-01		GH	B.1.596	1	GH-B.1.596
Capital Region	1083201	2020-12-01		GH	B.1.596	9	GH-B.1.596
Mid-Hudson	2319719	2020-12-01		GH	B.1.596	2	GH-B.1.596
New York City	8419316	2020-10-01		GH	B.1.596	3	GH-B.1.596
New York City	8419316	2020-11-01		GH	B.1.596	7	GH-B.1.596
New York City	8419316	2020-12-01		GH	B.1.596	26	GH-B.1.596
New York City	8419316	2020-12-01		GR	B.1.596	1	GR-B.1.596
North Country	421361	2020-12-01		GH	B.1.596	1	GH-B.1.596
Ontario CA	14570000	2020-11-01		GH	B.1.596	1	GH-B.1.596
all	2319719	2020-12-01		GH	B.1.601	3	GH-B.1.601
all	8419316	2020-10-01		GH	B.1.601	2	GH-B.1.601
all	8419316	2020-11-01		GH	B.1.601	8	GH-B.1.601
all	8419316	2020-12-01		GH	B.1.601	7	GH-B.1.601
Mid-Hudson	2319719	2020-12-01		GH	B.1.601	3	GH-B.1.601
New York City	8419316	2020-10-01		GH	B.1.601	2	GH-B.1.601
New York City	8419316	2020-11-01		GH	B.1.601	8	GH-B.1.601
New York City	8419316	2020-12-01		GH	B.1.601	7	GH-B.1.601
all	8419316	2020-08-01		G	B.1.602	3	G-B.1.602
all	8419316	2020-09-01		G	B.1.602	1	G-B.1.602
all	1382480	2020-09-01		G	B.1.602	1	G-B.1.602
New York City	8419316	2020-08-01		G	B.1.602	3	G-B.1.602
New York City	8419316	2020-09-01		G	B.1.602	1	G-B.1.602
Western New York	1382480	2020-09-01		G	B.1.602	1	G-B.1.602
all	486158	2020-12-01		GH	B.1.603	5	GH-B.1.603
all	8419316	2020-11-01		GH	B.1.603	1	GH-B.1.603
all	8419316	2020-12-01		GH	B.1.603	2	GH-B.1.603
Mohawk Valley	486158	2020-12-01		GH	B.1.603	5	GH-B.1.603
New York City	8419316	2020-11-01		GH	B.1.603	1	GH-B.1.603
New York City	8419316	2020-12-01		GH	B.1.603	2	GH-B.1.603
all	8419316	2020-07-01		GH	B.1.604	1	GH-B.1.604
all	8419316	2020-08-01		GH	B.1.604	2	GH-B.1.604
all	8419316	2020-09-01		GH	B.1.604	1	GH-B.1.604
all	8419316	2020-10-01		GH	B.1.604	1	GH-B.1.604
New York City	8419316	2020-07-01		GH	B.1.604	1	GH-B.1.604
New York City	8419316	2020-08-01		GH	B.1.604	2	GH-B.1.604
New York City	8419316	2020-09-01		GH	B.1.604	1	GH-B.1.604
New York City	8419316	2020-10-01		GH	B.1.604	1	GH-B.1.604
all	2840341	2020-10-01		GH	B.1.605	1	GH-B.1.605
all	8419316	2020-11-01		GH	B.1.605	2	GH-B.1.605
all	8419316	2020-12-01		GH	B.1.605	18	GH-B.1.605
Long Island	2840341	2020-10-01		GH	B.1.605	1	GH-B.1.605
New York City	8419316	2020-11-01		GH	B.1.605	2	GH-B.1.605
New York City	8419316	2020-12-01		GH	B.1.605	18	GH-B.1.605
all	8419316	2020-11-01		GH	B.1.606	1	GH-B.1.606
New York City	8419316	2020-11-01		GH	B.1.606	1	GH-B.1.606
all	8419316	2020-08-01		G	B.1.609	3	G-B.1.609
all	8419316	2020-09-01		G	B.1.609	1	G-B.1.609
all	8419316	2020-10-01		G	B.1.609	3	G-B.1.609
all	8419316	2020-11-01		G	B.1.609	7	G-B.1.609
New York City	8419316	2020-08-01		G	B.1.609	3	G-B.1.609
New York City	8419316	2020-09-01		G	B.1.609	1	G-B.1.609
New York City	8419316	2020-10-01		G	B.1.609	3	G-B.1.609
New York City	8419316	2020-11-01		G	B.1.609	7	G-B.1.609
all	2840341	2020-10-01		GH	B.1.612	1	GH-B.1.612
all	2319719	2020-10-01		GH	B.1.612	2	GH-B.1.612
all	8419316	2020-09-01		GH	B.1.612	3	GH-B.1.612
all	636657	2020-10-01		GH	B.1.612	2	GH-B.1.612
Long Island	2840341	2020-10-01		GH	B.1.612	1	GH-B.1.612
Mid-Hudson	2319719	2020-10-01		GH	B.1.612	2	GH-B.1.612
New York City	8419316	2020-09-01		GH	B.1.612	3	GH-B.1.612
Southern Tier	636657	2020-10-01		GH	B.1.612	2	GH-B.1.612
all	8419316	2020-12-01		GH	B.1.623	8	GH-B.1.623
New York City	8419316	2020-12-01		GH	B.1.623	8	GH-B.1.623
all	2319719	2020-12-01		GH	B.1.637	1	GH-B.1.637
all	8419316	2020-11-01		GH	B.1.637	1	GH-B.1.637
all	8419316	2020-12-01		GH	B.1.637	21	GH-B.1.637
Mid-Hudson	2319719	2020-12-01		GH	B.1.637	1	GH-B.1.637
New York City	8419316	2020-11-01		GH	B.1.637	1	GH-B.1.637
New York City	8419316	2020-12-01		GH	B.1.637	21	GH-B.1.637
all	8419316	2020-04-01		V	B.28	1	V-B.28
New York City	8419316	2020-04-01		V	B.28	1	V-B.28
all	1382480	2020-04-01		V	B.29	1	V-B.29
Western New York	1382480	2020-04-01		V	B.29	1	V-B.29
all	1083201	2020-04-01		L	B.3	2	L-B.3
all	1083201	2020-05-01		O	B.3	1	O-B.3
all	14570000	2020-04-01		L	B.3	4	L-B.3
all	14570000	2020-04-01		O	B.3	2	O-B.3
Capital Region	1083201	2020-04-01		L	B.3	2	L-B.3
Capital Region	1083201	2020-05-01		O	B.3	1	O-B.3
Ontario CA	14570000	2020-04-01		L	B.3	4	L-B.3
Ontario CA	14570000	2020-04-01		O	B.3	2	O-B.3
all	8419316	2020-04-01		V	B.37	10	V-B.37
New York City	8419316	2020-04-01		V	B.37	10	V-B.37
all	8419316	2020-04-01		V	B.40	3	V-B.40
all	14570000	2020-04-01		V	B.40	2	V-B.40
New York City	8419316	2020-04-01		V	B.40	3	V-B.40
Ontario CA	14570000	2020-04-01		V	B.40	2	V-B.40
all	14570000	2020-04-01		O	B.6	1	O-B.6
Ontario CA	14570000	2020-04-01		O	B.6	1	O-B.6
all	8419316	2020-08-01		GR	C.1	3	GR-C.1
New York City	8419316	2020-08-01		GR	C.1	3	GR-C.1
all	8419316	2020-07-01		GR	C.14	1	GR-C.14
New York City	8419316	2020-07-01		GR	C.14	1	GR-C.14
all	8419316	2020-12-01		GR	C.16	3	GR-C.16
all	14570000	2020-11-01		GR	C.16	1	GR-C.16
all	14570000	2020-12-01		GR	C.16	1	GR-C.16
New York City	8419316	2020-12-01		GR	C.16	3	GR-C.16
Ontario CA	14570000	2020-11-01		GR	C.16	1	GR-C.16
Ontario CA	14570000	2020-12-01		GR	C.16	1	GR-C.16
all	2840341	2020-12-01		GR	C.31	3	GR-C.31
all	8419316	2020-12-01		GR	C.31	8	GR-C.31
all	14570000	2020-11-01		GR	C.31	1	GR-C.31
Long Island	2840341	2020-12-01		GR	C.31	3	GR-C.31
New York City	8419316	2020-12-01		GR	C.31	8	GR-C.31
Ontario CA	14570000	2020-11-01		GR	C.31	1	GR-C.31
all	8419316	2020-10-01		GR	C.35	1	GR-C.35
all	8419316	2020-11-01		GR	C.35	2	GR-C.35
New York City	8419316	2020-10-01		GR	C.35	1	GR-C.35
New York City	8419316	2020-11-01		GR	C.35	2	GR-C.35
all	8419316	2020-10-01		GR	C.36	1	GR-C.36
all	8419316	2020-11-01		GR	C.36	2	GR-C.36
all	8419316	2020-12-01		GR	C.36	5	GR-C.36
New York City	8419316	2020-10-01		GR	C.36	1	GR-C.36
New York City	8419316	2020-11-01		GR	C.36	2	GR-C.36
New York City	8419316	2020-12-01		GR	C.36	5	GR-C.36
all	14570000	2020-09-01		GR	C.36.1	1	GR-C.36.1
all	14570000	2020-11-01		GR	C.36.1	16	GR-C.36.1
all	14570000	2020-12-01		GR	C.36.1	7	GR-C.36.1
Ontario CA	14570000	2020-09-01		GR	C.36.1	1	GR-C.36.1
Ontario CA	14570000	2020-11-01		GR	C.36.1	16	GR-C.36.1
Ontario CA	14570000	2020-12-01		GR	C.36.1	7	GR-C.36.1
all	8419316	2020-12-01		GR	L.3	1	GR-L.3
New York City	8419316	2020-12-01		GR	L.3	1	GR-L.3
all	14570000	2020-12-01	VOC Gamma GR/501Y.V3 (P.1+P.1.*)	GR	P.1.14	1	GR-P.1.14
Ontario CA	14570000	2020-12-01	VOC Gamma GR/501Y.V3 (P.1+P.1.*)	GR	P.1.14	1	GR-P.1.14
all	8419316	2020-11-01	VOI Zeta GR/484K.V2 (P.2)	GR	P.2	2	GR-P.2
all	8419316	2020-12-01	VOI Zeta GR/484K.V2 (P.2)	GR	P.2	7	GR-P.2
all	14570000	2020-11-01	VOI Zeta GR/484K.V2 (P.2)	GR	P.2	10	GR-P.2
all	14570000	2020-12-01	VOI Zeta GR/484K.V2 (P.2)	GR	P.2	8	GR-P.2
New York City	8419316	2020-11-01	VOI Zeta GR/484K.V2 (P.2)	GR	P.2	2	GR-P.2
New York City	8419316	2020-12-01	VOI Zeta GR/484K.V2 (P.2)	GR	P.2	7	GR-P.2
Ontario CA	14570000	2020-11-01	VOI Zeta GR/484K.V2 (P.2)	GR	P.2	10	GR-P.2
Ontario CA	14570000	2020-12-01	VOI Zeta GR/484K.V2 (P.2)	GR	P.2	8	GR-P.2
all	8419316	2020-11-01		GR	R.1	1	GR-R.1
all	8419316	2020-12-01		GR	R.1	8	GR-R.1
all	1382480	2020-12-01		GR	R.1	2	GR-R.1
New York City	8419316	2020-11-01		GR	R.1	1	GR-R.1
New York City	8419316	2020-12-01		GR	R.1	8	GR-R.1
Western New York	1382480	2020-12-01		GR	R.1	2	GR-R.1
all	8419316	2020-04-01		G	Unassigned	2	G-Unassigned
all	8419316	2020-04-01		GH	Unassigned	2	GH-Unassigned
all	8419316	2020-05-01		GH	Unassigned	3	GH-Unassigned
all	8419316	2020-09-01		G	Unassigned	1	G-Unassigned
all	8419316	2020-10-01		G	Unassigned	3	G-Unassigned
all	8419316	2020-10-01		GH	Unassigned	1	GH-Unassigned
all	8419316	2020-11-01		G	Unassigned	4	G-Unassigned
all	8419316	2020-12-01		G	Unassigned	14	G-Unassigned
all	8419316	2020-12-01		GH	Unassigned	10	GH-Unassigned
all	8419316	2020-12-01		GR	Unassigned	4	GR-Unassigned
all	8419316	2020-12-01		O	Unassigned	1	O-Unassigned
New York City	8419316	2020-04-01		G	Unassigned	2	G-Unassigned
New York City	8419316	2020-04-01		GH	Unassigned	2	GH-Unassigned
New York City	8419316	2020-05-01		GH	Unassigned	3	GH-Unassigned
New York City	8419316	2020-09-01		G	Unassigned	1	G-Unassigned
New York City	8419316	2020-10-01		G	Unassigned	3	G-Unassigned
New York City	8419316	2020-10-01		GH	Unassigned	1	GH-Unassigned
New York City	8419316	2020-11-01		G	Unassigned	4	G-Unassigned
New York City	8419316	2020-12-01		G	Unassigned	14	G-Unassigned
New York City	8419316	2020-12-01		GH	Unassigned	10	GH-Unassigned
New York City	8419316	2020-12-01		GR	Unassigned	4	GR-Unassigned
New York City	8419316	2020-12-01		O	Unassigned	1	O-Unassigned
all	8419316	2020-12-01		GV	W.1	2	GV-W.1
New York City	8419316	2020-12-01		GV	W.1	2	GV-W.1

## Sheet: WNY
Pango.lineage	Variant	2020-04	2020-05	2020-06	2020-07	2020-08	2020-09	2020-10	2020-11	2020-12
A		1
A.1		11
B							1
B.1.1.10		1
B.1.1.192						4		3	2
B.1.1.222							4	6		5
B.1.1.265					1			1		1
B.1.1.329								1
B.1.1.432						1
B.1.1.432						22
B.1.1.464						4	10	1	1	7
B.1.110.3						1		5	11	1
B.1.119						1
B.1.240						1	2
B.1.280							5	1	34	5
B.1.298			2
B.1.3									1
B.1.306									2	1
B.1.311									1	9
B.1.313					2
B.1.324					1					2
B.1.340					1		1
B.1.361										1
B.1.400										4
B.1.423						1
B.1.426							1
B.1.436						1	1
B.1.451						1
B.1.509					3	12	17
B.1.541								2	13	20
B.1.551										1
B.1.556									4	15
B.1.567			1
B.1.576					2
B.1.578							2
B.1.582								1	2	5
B.1.586			1							3
B.1.588
B.1.595						1	1		5	2
B.1.595.1					5	2
B.1.595.3						1
B.1.602							1
B.29		1
R.1										2

## Sheet: NYC
Pango.lineage	Variant	2020-04	2020-05	2020-06	2020-07	2020-08	2020-09	2020-10	2020-11	2020-12
A		3	1
A.1		4
A.19						1
A.2.5										1
A.21										1
A.28										1
AY.3.1	VOC Delta GK (B.1.617.2+AY.*)								1
B		5		1					1
B.1.1.1							2	5	2	5
B.1.1.101						1		1	1	2
B.1.1.117								1
B.1.1.123							1
B.1.1.128								2
B.1.1.135								3
B.1.1.159										1
B.1.1.161										2
B.1.1.186								1	3	3
B.1.1.192						1		1	3	5
B.1.1.207								4	6	20
B.1.1.222							2	4	13	17
B.1.1.225				1	2	1
B.1.1.231		1	4		1	8	3	8	9	11
B.1.1.243							2
B.1.1.25						2	3	41	2	12
B.1.1.258										1
B.1.1.265								3	3	24
B.1.1.274										1
B.1.1.28				3						2
B.1.1.291							1			1
B.1.1.294									2
B.1.1.304					1					1
B.1.1.305								4
B.1.1.316								1	3	9
B.1.1.317									3
B.1.1.322									1
B.1.1.329					1	4	3	4
B.1.1.33								2
B.1.1.337								3	3	1
B.1.1.348								3		12
B.1.1.351										4
B.1.1.368								1	3	6
B.1.1.37									1
B.1.1.376						5
B.1.1.39										3
B.1.1.404									1
B.1.1.409										3
B.1.1.411										4
B.1.1.416								3	9
B.1.1.420										3
B.1.1.432							5	7	1	6
B.1.1.437						1
B.1.1.46						1
B.1.1.461							1	17	23	22
B.1.1.464								2	2	2
B.1.1.467								7	7	16
B.1.1.48										1
B.1.1.486						4	4	2	34	81
B.1.1.50							1	2
B.1.1.518										2
B.1.1.519										12
B.1.1.61		3
B.1.1.7	VOC Alpha GRY (B.1.1.7+Q.*)			1						6
B.1.1.70						1		2	5
B.1.1.72							1	1
B.1.1.8		1					3
B.1.1.89								1
B.1.108		22	6		2	1
B.1.110.3						1	1	13	16	36
B.1.111								4	5	8
B.1.115							7	2
B.1.139					1				1
B.1.160						1	1	2	1	2
B.1.160.23									1
B.1.164									1
B.1.170		1
B.1.177						2	2	3	1	19
B.1.177.53									1
B.1.177.54									1
B.1.177.86										7
B.1.189										3
B.1.221									1
B.1.232									1
B.1.236								1
B.1.239							2		3	1
B.1.240					2	9	13	19	12	27
B.1.241									1
B.1.242		1
B.1.256										2
B.1.258								2	1	1
B.1.258.5							1
B.1.265							1
B.1.280					1				2	2
B.1.292		1
B.1.293						2	1		1	2
B.1.298							1	1	5	7
B.1.3								1	5	1
B.1.302		6
B.1.306								1	3	15
B.1.308				1
B.1.309								1
B.1.311		1						2	8	19
B.1.314		10	2
B.1.319		21	7	6		1
B.1.320								2		4
B.1.323		1
B.1.324								2	2	4
B.1.332		24	9
B.1.333			1
B.1.334		2
B.1.335			1
B.1.336							5	8
B.1.337										2
B.1.338		1
B.1.340										1
B.1.346									1
B.1.356		1
B.1.359			1
B.1.36							1	2		2
B.1.36.10										1
B.1.36.29										1
B.1.36.31										6
B.1.36.34										2
B.1.36.8										2
B.1.360										1
B.1.361							3	2	3	11
B.1.362										2
B.1.375									3	11
B.1.383		1			1
B.1.385								1
B.1.390								2	1
B.1.396							1		2	2
B.1.399							1		1
B.1.400							1	2	1	6
B.1.413		9
B.1.420									1
B.1.425										1
B.1.426									1
B.1.427	VOI Epsilon GH/452R.V1 (B.1.429+B.1.427)									9
B.1.429	VOI Epsilon GH/452R.V1 (B.1.429+B.1.427)								4	41
B.1.433								1	3	22
B.1.436							2
B.1.438.4										1
B.1.439		4
B.1.448		1							1	2
B.1.451						1
B.1.471										1
B.1.478							4	1	3	2
B.1.499			1
B.1.500					1
B.1.503			1							1
B.1.506		2
B.1.507		5	4
B.1.509				1	5	3	11	19	1	3
B.1.520		1
B.1.521					2
B.1.523										1
B.1.525	VOI Eta G/484K.V3 (B.1.525)									2
B.1.526	VOI Iota GH/253G.V1 (B.1.526)								3	59
B.1.527								1
B.1.539									2	1
B.1.541									1
B.1.543						1			6	18
B.1.544									2	5
B.1.555					2
B.1.558										1
B.1.561									1	6
B.1.563										4
B.1.564					1	2	4	11	6	6
B.1.565							2	3	3	5
B.1.566		1
B.1.575										45
B.1.576		1		1	1	1	4	1		1
B.1.577									1
B.1.578										1
B.1.582					1	1			1	1
B.1.585									1	17
B.1.588								4	24	59
B.1.593							1
B.1.595						1	3	2	4	4
B.1.595.1					1			2
B.1.595.3							1
B.1.596								3	7	27
B.1.601								2	8	7
B.1.602						3	2
B.1.603									1	2
B.1.604					1	2	1	1
B.1.605									2	18
B.1.606									1
B.1.609						3	1	3	7
B.1.612							3
B.1.623										8
B.1.637									1	21
B.28		1
B.37		10
B.40		3
C.1						3
C.14					1
C.16										3
C.31										8
C.35								1	2
C.36								1	2	5
L.3										1
P.2	VOI Zeta GR/484K.V2 (P.2)								2	7
R.1									1	8
Unassigned		4	3				1	4	4	29
W.1										2

## Sheet: LI
Pango.lineage	Variant	2020-04	2020-05	2020-06	2020-07	2020-08	2020-09	2020-10	2020-11	2020-12
A										1
A.1		2
B										1
B.1.1.192					1	4				1
B.1.1.207							1			2
B.1.1.222										1
B.1.1.231						1				1
B.1.1.265							1			2
B.1.1.28										2
B.1.1.306										2
B.1.1.407										1
B.1.1.467										1
B.1.1.486									2	13
B.1.1.519										3
B.1.1.7	VOC Alpha GRY (B.1.1.7+Q.*)									3
B.1.1.8		1
B.1.108		1
B.1.160									1
B.1.177										2
B.1.240										1
B.1.311										2
B.1.319		1
B.1.320										1
B.1.324									1	3
B.1.332		4
B.1.340					1
B.1.36							1		1	1
B.1.375										2
B.1.383		1
B.1.427	VOI Epsilon GH/452R.V1 (B.1.429+B.1.427)									1
B.1.429	VOI Epsilon GH/452R.V1 (B.1.429+B.1.427)									4
B.1.499.1										1
B.1.507		1
B.1.509										1
B.1.526	VOI Iota GH/253G.V1 (B.1.526)									1
B.1.543										2
B.1.563										2
B.1.564						1	1		1
B.1.575										2
B.1.576										2
B.1.585										1
B.1.588									1	20
B.1.605								1
B.1.612								1
C.31										1

## Sheet: ONTARIO, CA
Pango.lineage	Variant	2020-04	2020-05	2020-06	2020-07	2020-08	2020-09	2020-10	2020-11	2020-12
A.1		7
A.3		1
AE.8						2	33	9	47	6
AL.1									42	7
AM.2									5
AM.4									47	37
B		6
B.1.1.1			1	1					4	2
B.1.1.10		3
B.1.1.118					1
B.1.1.135					1
B.1.1.157					5	32	15	6	28	3
B.1.1.176			1					3	5	3
B.1.1.189							2
B.1.1.216									5	1
B.1.1.218						1
B.1.1.25									2	4
B.1.1.263						1
B.1.1.291						1
B.1.1.306						1
B.1.1.329									1	5
B.1.1.33		6	2	5	9				1
B.1.1.343									6	4
B.1.1.368									3
B.1.1.369		1
B.1.1.39										1
B.1.1.404							1
B.1.1.413							1
B.1.1.416										2
B.1.1.485		2
B.1.1.519										1
B.1.1.63						1
B.1.1.7	VOC Alpha GRY (B.1.1.7+Q.*)								1
B.1.110.3									1
B.1.111									1	1
B.1.128						3	1		1
B.1.147		6	23	3
B.1.160								1	9	34
B.1.166		1
B.1.167		8	1	1
B.1.170									1
B.1.177.23							1
B.1.241								1
B.1.258										1
B.1.265						1	4	2	13	3
B.1.270		11	5	3
B.1.279						2
B.1.311									1
B.1.316		1	4	2
B.1.346									5	27
B.1.350		18	4					1
B.1.36				1		4	1	2	42	14
B.1.36.29									4
B.1.36.31									7	8
B.1.36.34				1
B.1.36.36									1
B.1.36.38							1		90	30
B.1.36.8							1	2	15	1
B.1.36.9										1
B.1.396									1
B.1.415		1
B.1.438.1									14	27
B.1.469										2
B.1.471									3
B.1.509					1		1
B.1.523							47	15	9	4
B.1.525	VOI Eta G/484K.V3 (B.1.525)									5
B.1.552		1
B.1.570									5
B.1.576									1
B.1.595		1								1
B.1.596									1
B.3		6
B.40		2
B.6		1
C.16									1	1
C.31									1
C.36.1							1		16	7
P.1.14	VOC Gamma GR/501Y.V3 (P.1+P.1.*)									1
P.2	VOI Zeta GR/484K.V2 (P.2)								10	8

## Sheet: CENTRAL 
Pango.lineage	Variant	2020-04	2020-05	2020-06	2020-07	2020-08	2020-09	2020-10	2020-11	2020-12
B.1.1.345										2
B.1.1.368									1
B.1.311										2
B.1.361										1
B.1.506				2	1
B.1.588										1
B.1.595				1

## Sheet: FINGER 
Pango.lineage	Variant	2020-04	2020-05	2020-06	2020-07	2020-08	2020-09	2020-10	2020-11	2020-12
A.1			1
B.1.1.482					1
B.1.240								4		1
B.1.298										1
B.1.311										4
B.1.361										15
B.1.541										1
B.1.556										2
B.1.582										1
B.1.586		1	1
B.1.595										1

## Sheet: MOHAWK 
Pango.lineage	Variant	2020-04	2020-05	2020-06	2020-07	2020-08	2020-09	2020-10	2020-11	2020-12
B.1.1.116										1
B.1.1.135				2
B.1.1.225					1
B.1.1.226						4
B.1.1.231										1
B.1.1.33									1
B.1.1.482					4	1
B.1.1.486										1
B.1.240					1		1
B.1.293						1	1
B.1.306					2	1
B.1.311								1	6	1
B.1.332		1
B.1.334			1	11	23	1
B.1.384				2
B.1.436							1
B.1.506				13	9	3
B.1.509									1
B.1.576					2
B.1.603										5

## Sheet: MID-HUDSON 
Pango.lineage	Variant	2020-04	2020-05	2020-06	2020-07	2020-08	2020-09	2020-10	2020-11	2020-12
B.1.1.1								1
B.1.1.186									1
B.1.1.207									1	1
B.1.1.222								1
B.1.1.231										1
B.1.1.25
B.1.1.337										1
B.1.1.348										1
B.1.1.39										1
B.1.1.432										1
B.1.1.461										1
B.1.1.486										15
B.1.108		1
B.1.112				2
B.1.139				1
B.1.140									1
B.1.293							2
B.1.311										5
B.1.318									1
B.1.319		10		1
B.1.332		2
B.1.361										3
B.1.375										4
B.1.400										3
B.1.429	VOI Epsilon GH/452R.V1 (B.1.429+B.1.427)									2
B.1.433										1
B.1.526	VOI Iota GH/253G.V1 (B.1.526)									6
B.1.543										1
B.1.564							1			2
B.1.567										1
B.1.575										3
B.1.588									1	9
B.1.596										2
B.1.601										3
B.1.612								2
B.1.637										1

## Sheet: SOUTHERN 
Pango.lineage	Variant	2020-04	2020-05	2020-06	2020-07	2020-08	2020-09	2020-10	2020-11	2020-12
B.1.166		2
B.1.306									1
B.1.311										1
B.1.567		1
B.1.576							18
B.1.612								2

[truncated: 2 more sheets: NORTH , CAPITAL ]
