# Supplementary material for: Genomic profiling and spatial SEIR modeling of COVID-19 transmission in Western New York
Source: Front Microbiol. 2024 Sep 27;15:1416580. doi: 10.3389/fmicb.2024.1416580 (PMC11468862; doi:10.3389/fmicb.2024.1416580)
Supplement: Supplementary file 3 [file Table_3.XLSX]

## Sheet: Sheet1
Region	Population	month	Variant	Clade	Pango.lineage	n	clade.pango	clade_membership
all	8419316	2021-02-01		O	A	2	O-A	19B
all	8419316	2021-02-01		S	A	1	S-A	19B
all	14570000	2021-02-01		S	A	1	S-A	19B
all	14570000	2021-03-01		S	A	1	S-A	19B
all	2840341	2021-04-01		S	A.2.5	2	S-A.2.5	NA
all	2840341	2021-05-01		S	A.2.5	1	S-A.2.5	NA
all	2840341	2021-06-01		S	A.2.5	1	S-A.2.5	NA
all	2319719	2021-03-01		S	A.2.5	1	S-A.2.5	NA
all	8419316	2021-01-01		S	A.2.5	1	S-A.2.5	NA
all	8419316	2021-02-01		S	A.2.5	22	S-A.2.5	NA
all	8419316	2021-03-01		S	A.2.5	34	S-A.2.5	NA
all	8419316	2021-04-01		S	A.2.5	31	S-A.2.5	NA
all	8419316	2021-05-01		S	A.2.5	46	S-A.2.5	NA
all	8419316	2021-06-01		S	A.2.5	10	S-A.2.5	NA
all	8419316	2021-07-01		S	A.2.5	7	S-A.2.5	NA
all	8419316	2021-08-01		O	A.2.5	1	O-A.2.5	NA
all	8419316	2021-08-01		S	A.2.5	2	S-A.2.5	NA
all	8419316	2021-09-01		S	A.2.5	1	S-A.2.5	NA
all	8419316	2021-03-01		S	A.2.5.1	2	S-A.2.5.1	NA
all	8419316	2021-04-01		S	A.2.5.1	4	S-A.2.5.1	NA
all	8419316	2021-01-01		S	A.2.5.2	7	S-A.2.5.2	19B
all	8419316	2021-02-01		S	A.2.5.2	1	S-A.2.5.2	19B
all	8419316	2021-03-01		S	A.2.5.2	3	S-A.2.5.2	19B
all	8419316	2021-04-01		S	A.2.5.2	1	S-A.2.5.2	19B
all	8419316	2021-05-01		S	A.2.5.2	1	S-A.2.5.2	19B
all	8419316	2021-07-01		S	A.2.5.2	3	S-A.2.5.2	19B
all	8419316	2021-11-01		S	A.2.5.2	1	S-A.2.5.2	19B
all	8419316	2021-04-01		S	A.2.5.3	1	S-A.2.5.3	NA
all	8419316	2021-02-01		S	A.21	1	S-A.21	19B
all	8419316	2021-01-01		S	A.23.1	1	S-A.23.1	19B
all	8419316	2021-02-01		S	A.23.1	1	S-A.23.1	19B
all	8419316	2021-03-01		S	A.23.1	1	S-A.23.1	19B
all	8419316	2021-04-01		S	A.23.1	4	S-A.23.1	19B
all	14570000	2021-01-01		S	A.23.1	7	S-A.23.1	19B
all	14570000	2021-03-01		S	A.23.1	1	S-A.23.1	19B
all	8419316	2021-02-01		S	A.28	1	S-A.28	NA
all	14570000	2021-01-01		S	A.29	1	S-A.29	NA
all	14570000	2021-02-01		S	A.29	1	S-A.29	NA
all	14570000	2021-01-01		GR	AE.8	13	GR-AE.8	NA
all	14570000	2021-03-01		GR	AE.8	1	GR-AE.8	NA
all	14570000	2021-01-01		GR	AL.1	15	GR-AL.1	NA
all	14570000	2021-02-01		GR	AL.1	5	GR-AL.1	NA
all	14570000	2021-03-01		GR	AL.1	1	GR-AL.1	NA
all	14570000	2021-01-01		GR	AM.4	47	GR-AM.4	NA
all	14570000	2021-02-01		GR	AM.4	28	GR-AM.4	NA
all	14570000	2021-03-01		GR	AM.4	8	GR-AM.4	NA
all	14570000	2021-07-01		GR	AT.1	1	GR-AT.1	NA
all	777706	2021-11-01	VOC Delta GK (B.1.617.2+AY.*)	GK	AY.1	2	GK-AY.1	21J (Delta)
all	1205380	2021-11-01	VOC Delta GK (B.1.617.2+AY.*)	GK	AY.1	6	GK-AY.1	21J (Delta)
all	8419316	2021-05-01	VOC Delta GK (B.1.617.2+AY.*)	GK	AY.1	4	GK-AY.1	21J (Delta)
all	8419316	2021-07-01	VOC Delta GK (B.1.617.2+AY.*)	GK	AY.1	2	GK-AY.1	21J (Delta)
all	8419316	2021-08-01	VOC Delta GK (B.1.617.2+AY.*)	GK	AY.1	30	GK-AY.1	21J (Delta)
all	8419316	2021-09-01	VOC Delta GK (B.1.617.2+AY.*)	GK	AY.1	5	GK-AY.1	21J (Delta)
all	8419316	2021-10-01	VOC Delta GK (B.1.617.2+AY.*)	GK	AY.1	3	GK-AY.1	21J (Delta)
all	8419316	2021-11-01	VOC Delta GK (B.1.617.2+AY.*)	GK	AY.1	3	GK-AY.1	21J (Delta)
all	8419316	2021-12-01	VOC Delta GK (B.1.617.2+AY.*)	GK	AY.1	1	GK-AY.1	21J (Delta)
all	1382480	2021-09-01	VOC Delta GK (B.1.617.2+AY.*)	GK	AY.1	1	GK-AY.1	21J (Delta)
all	1382480	2021-12-01	VOC Delta GK (B.1.617.2+AY.*)	GK	AY.1	1	GK-AY.1	21J (Delta)
all	14570000	2021-06-01	VOC Delta GK (B.1.617.2+AY.*)	GK	AY.10	2	GK-AY.10	NA
all	8419316	2021-09-01	VOC Delta GK (B.1.617.2+AY.*)	GK	AY.101	1	GK-AY.101	NA
all	8419316	2021-10-01	VOC Delta GK (B.1.617.2+AY.*)	GK	AY.101	1	GK-AY.101	NA
all	8419316	2021-05-01	VOC Delta GK (B.1.617.2+AY.*)	GK	AY.102	1	GK-AY.102	21J (Delta)
all	8419316	2021-08-01	VOC Delta GK (B.1.617.2+AY.*)	GK	AY.102	1	GK-AY.102	21J (Delta)
all	8419316	2021-09-01	VOC Delta GK (B.1.617.2+AY.*)	GK	AY.102	1	GK-AY.102	21J (Delta)
all	8419316	2021-10-01	VOC Delta GK (B.1.617.2+AY.*)	GK	AY.102	1	GK-AY.102	21J (Delta)
all	1382480	2021-11-01	VOC Delta GK (B.1.617.2+AY.*)	GK	AY.102	4	GK-AY.102	21J (Delta)
all	14570000	2021-05-01	VOC Delta GK (B.1.617.2+AY.*)	GK	AY.102	1	GK-AY.102	21J (Delta)
all	8419316	2021-08-01	VOC Delta GK (B.1.617.2+AY.*)	GK	AY.103.1	2	GK-AY.103.1	NA
all	8419316	2021-09-01	VOC Delta GK (B.1.617.2+AY.*)	GK	AY.103.1	3	GK-AY.103.1	NA
all	8419316	2021-06-01	VOC Delta GK (B.1.617.2+AY.*)	GK	AY.105	1	GK-AY.105	NA
all	8419316	2021-08-01	VOC Delta GK (B.1.617.2+AY.*)	GK	AY.105	10	GK-AY.105	NA
all	8419316	2021-09-01	VOC Delta GK (B.1.617.2+AY.*)	GK	AY.105	1	GK-AY.105	NA
all	8419316	2021-10-01	VOC Delta GK (B.1.617.2+AY.*)	GK	AY.105	10	GK-AY.105	NA
all	8419316	2021-11-01	VOC Delta GK (B.1.617.2+AY.*)	GK	AY.105	1	GK-AY.105	NA
all	14570000	2021-11-01	VOC Delta GK (B.1.617.2+AY.*)	GK	AY.105	2	GK-AY.105	NA
all	8419316	2021-09-01	VOC Delta GK (B.1.617.2+AY.*)	GK	AY.106	2	GK-AY.106	NA
all	8419316	2021-10-01	VOC Delta GK (B.1.617.2+AY.*)	GK	AY.106	5	GK-AY.106	NA
all	8419316	2021-11-01	VOC Delta GK (B.1.617.2+AY.*)	G	AY.106	2	G-AY.106	NA
all	8419316	2021-11-01	VOC Delta GK (B.1.617.2+AY.*)	GK	AY.106	1	GK-AY.106	NA
all	14570000	2021-11-01	VOC Delta GK (B.1.617.2+AY.*)	GK	AY.106	4	GK-AY.106	NA
all	14570000	2021-12-01	VOC Delta GK (B.1.617.2+AY.*)	GK	AY.106	5	GK-AY.106	NA
all	777706	2021-09-01	VOC Delta GK (B.1.617.2+AY.*)	GK	AY.107	6	GK-AY.107	21J (Delta)
all	777706	2021-10-01	VOC Delta GK (B.1.617.2+AY.*)	G	AY.107	1	G-AY.107	21J (Delta)
all	777706	2021-10-01	VOC Delta GK (B.1.617.2+AY.*)	GK	AY.107	1	GK-AY.107	21J (Delta)
all	777706	2021-11-01	VOC Delta GK (B.1.617.2+AY.*)	GK	AY.107	1	GK-AY.107	21J (Delta)
all	1205380	2021-08-01	VOC Delta GK (B.1.617.2+AY.*)	GK	AY.107	2	GK-AY.107	21J (Delta)
all	1205380	2021-09-01	VOC Delta GK (B.1.617.2+AY.*)	GK	AY.107	4	GK-AY.107	21J (Delta)
all	2840341	2021-09-01	VOC Delta GK (B.1.617.2+AY.*)	G	AY.107	1	G-AY.107	21J (Delta)
all	2319719	2021-08-01	VOC Delta GK (B.1.617.2+AY.*)	GK	AY.107	2	GK-AY.107	21J (Delta)
all	8419316	2021-05-01	VOC Delta GK (B.1.617.2+AY.*)	GK	AY.107	7	GK-AY.107	21J (Delta)
all	8419316	2021-06-01	VOC Delta GK (B.1.617.2+AY.*)	G	AY.107	1	G-AY.107	21J (Delta)
all	8419316	2021-06-01	VOC Delta GK (B.1.617.2+AY.*)	GK	AY.107	25	GK-AY.107	21J (Delta)
all	8419316	2021-07-01	VOC Delta GK (B.1.617.2+AY.*)	GK	AY.107	9	GK-AY.107	21J (Delta)
all	8419316	2021-08-01	VOC Delta GK (B.1.617.2+AY.*)	GK	AY.107	31	GK-AY.107	21J (Delta)
all	8419316	2021-09-01	VOC Delta GK (B.1.617.2+AY.*)	G	AY.107	1	G-AY.107	21J (Delta)
all	8419316	2021-09-01	VOC Delta GK (B.1.617.2+AY.*)	GK	AY.107	70	GK-AY.107	21J (Delta)
all	8419316	2021-09-01	VOC Delta GK (B.1.617.2+AY.*)	O	AY.107	3	O-AY.107	21J (Delta)
all	8419316	2021-10-01	VOC Delta GK (B.1.617.2+AY.*)	GK	AY.107	30	GK-AY.107	21J (Delta)
all	8419316	2021-10-01	VOC Delta GK (B.1.617.2+AY.*)	O	AY.107	1	O-AY.107	21J (Delta)
all	8419316	2021-11-01	VOC Delta GK (B.1.617.2+AY.*)	GK	AY.107	9	GK-AY.107	21J (Delta)
all	8419316	2021-12-01	VOC Delta GK (B.1.617.2+AY.*)	G	AY.107	1	G-AY.107	21J (Delta)
all	8419316	2021-12-01	VOC Delta GK (B.1.617.2+AY.*)	GK	AY.107	21	GK-AY.107	21J (Delta)
all	636657	2021-09-01	VOC Delta GK (B.1.617.2+AY.*)	GK	AY.107	1	GK-AY.107	21J (Delta)
all	1382480	2021-08-01	VOC Delta GK (B.1.617.2+AY.*)	GK	AY.107	3	GK-AY.107	21J (Delta)
all	1382480	2021-10-01	VOC Delta GK (B.1.617.2+AY.*)	GK	AY.107	1	GK-AY.107	21J (Delta)
all	14570000	2021-08-01	VOC Delta GK (B.1.617.2+AY.*)	GK	AY.107	2	GK-AY.107	21J (Delta)
all	14570000	2021-12-01	VOC Delta GK (B.1.617.2+AY.*)	GK	AY.107	2	GK-AY.107	21J (Delta)
all	2319719	2021-07-01	VOC Delta GK (B.1.617.2+AY.*)	GK	AY.108	1	GK-AY.108	21J (Delta)
all	8419316	2021-09-01	VOC Delta GK (B.1.617.2+AY.*)	GK	AY.108	2	GK-AY.108	21J (Delta)
all	14570000	2021-07-01	VOC Delta GK (B.1.617.2+AY.*)	GK	AY.108	1	GK-AY.108	21J (Delta)
all	14570000	2021-08-01	VOC Delta GK (B.1.617.2+AY.*)	GK	AY.108	1	GK-AY.108	21J (Delta)
all	14570000	2021-09-01	VOC Delta GK (B.1.617.2+AY.*)	GK	AY.108	1	GK-AY.108	21J (Delta)
all	14570000	2021-12-01	VOC Delta GK (B.1.617.2+AY.*)	GK	AY.108	1	GK-AY.108	21J (Delta)
all	8419316	2021-07-01	VOC Delta GK (B.1.617.2+AY.*)	GK	AY.109	2	GK-AY.109	NA
all	8419316	2021-08-01	VOC Delta GK (B.1.617.2+AY.*)	GK	AY.109	4	GK-AY.109	NA
all	8419316	2021-09-01	VOC Delta GK (B.1.617.2+AY.*)	GK	AY.109	3	GK-AY.109	NA
all	8419316	2021-10-01	VOC Delta GK (B.1.617.2+AY.*)	GK	AY.109	7	GK-AY.109	NA
all	8419316	2021-11-01	VOC Delta GK (B.1.617.2+AY.*)	GK	AY.109	20	GK-AY.109	NA
all	8419316	2021-12-01	VOC Delta GK (B.1.617.2+AY.*)	GK	AY.109	2	GK-AY.109	NA
all	14570000	2021-09-01	VOC Delta GK (B.1.617.2+AY.*)	GK	AY.109	3	GK-AY.109	NA
all	14570000	2021-10-01	VOC Delta GK (B.1.617.2+AY.*)	GK	AY.109	2	GK-AY.109	NA
all	14570000	2021-11-01	VOC Delta GK (B.1.617.2+AY.*)	GK	AY.109	5	GK-AY.109	NA
all	636657	2021-09-01	VOC Delta GK (B.1.617.2+AY.*)	GK	AY.11	1	GK-AY.11	NA
all	1083201	2021-07-01	VOC Delta GK (B.1.617.2+AY.*)	GK	AY.110	1	GK-AY.110	21J (Delta)
all	1083201	2021-08-01	VOC Delta GK (B.1.617.2+AY.*)	GK	AY.110	2	GK-AY.110	21J (Delta)
all	1083201	2021-09-01	VOC Delta GK (B.1.617.2+AY.*)	G	AY.110	1	G-AY.110	21J (Delta)
all	1205380	2021-07-01	VOC Delta GK (B.1.617.2+AY.*)	GK	AY.110	6	GK-AY.110	21J (Delta)
all	1205380	2021-08-01	VOC Delta GK (B.1.617.2+AY.*)	GK	AY.110	10	GK-AY.110	21J (Delta)
all	1205380	2021-09-01	VOC Delta GK (B.1.617.2+AY.*)	GK	AY.110	1	GK-AY.110	21J (Delta)
all	2840341	2021-08-01	VOC Delta GK (B.1.617.2+AY.*)	GK	AY.110	1	GK-AY.110	21J (Delta)
all	2319719	2021-08-01	VOC Delta GK (B.1.617.2+AY.*)	GK	AY.110	2	GK-AY.110	21J (Delta)
all	8419316	2021-07-01	VOC Delta GK (B.1.617.2+AY.*)	GK	AY.110	13	GK-AY.110	21J (Delta)
all	8419316	2021-08-01	VOC Delta GK (B.1.617.2+AY.*)	GK	AY.110	39	GK-AY.110	21J (Delta)
all	8419316	2021-09-01	VOC Delta GK (B.1.617.2+AY.*)	G	AY.110	1	G-AY.110	21J (Delta)
all	8419316	2021-09-01	VOC Delta GK (B.1.617.2+AY.*)	GK	AY.110	20	GK-AY.110	21J (Delta)
all	8419316	2021-11-01	VOC Delta GK (B.1.617.2+AY.*)	GK	AY.110	2	GK-AY.110	21J (Delta)
all	1382480	2021-08-01	VOC Delta GK (B.1.617.2+AY.*)	GK	AY.110	1	GK-AY.110	21J (Delta)
all	14570000	2021-07-01	VOC Delta GK (B.1.617.2+AY.*)	GK	AY.110	2	GK-AY.110	21J (Delta)
all	14570000	2021-08-01	VOC Delta GK (B.1.617.2+AY.*)	GK	AY.110	2	GK-AY.110	21J (Delta)
all	2319719	2021-09-01	VOC Delta GK (B.1.617.2+AY.*)	G	AY.111	3	G-AY.111	NA
all	8419316	2021-08-01	VOC Delta GK (B.1.617.2+AY.*)	GK	AY.111	2	GK-AY.111	NA
all	8419316	2021-09-01	VOC Delta GK (B.1.617.2+AY.*)	G	AY.111	1	G-AY.111	NA
all	8419316	2021-09-01	VOC Delta GK (B.1.617.2+AY.*)	GK	AY.111	2	GK-AY.111	NA
all	8419316	2021-10-01	VOC Delta GK (B.1.617.2+AY.*)	GK	AY.111	2	GK-AY.111	NA
all	8419316	2021-11-01	VOC Delta GK (B.1.617.2+AY.*)	GK	AY.111	2	GK-AY.111	NA
all	8419316	2021-12-01	VOC Delta GK (B.1.617.2+AY.*)	GK	AY.111	2	GK-AY.111	NA
all	1083201	2021-08-01	VOC Delta GK (B.1.617.2+AY.*)	GK	AY.112	1	GK-AY.112	21J (Delta)
all	1083201	2021-09-01	VOC Delta GK (B.1.617.2+AY.*)	GK	AY.112	2	GK-AY.112	21J (Delta)
all	1083201	2021-10-01	VOC Delta GK (B.1.617.2+AY.*)	GK	AY.112	1	GK-AY.112	21J (Delta)
all	777706	2021-07-01	VOC Delta GK (B.1.617.2+AY.*)	GK	AY.112	1	GK-AY.112	21J (Delta)
all	1205380	2021-08-01	VOC Delta GK (B.1.617.2+AY.*)	G	AY.112	1	G-AY.112	21J (Delta)
all	1205380	2021-09-01	VOC Delta GK (B.1.617.2+AY.*)	G	AY.112	1	G-AY.112	21J (Delta)
all	1205380	2021-09-01	VOC Delta GK (B.1.617.2+AY.*)	GK	AY.112	2	GK-AY.112	21J (Delta)
all	1205380	2021-10-01	VOC Delta GK (B.1.617.2+AY.*)	GK	AY.112	1	GK-AY.112	21J (Delta)
all	2840341	2021-08-01	VOC Delta GK (B.1.617.2+AY.*)	GK	AY.112	3	GK-AY.112	21J (Delta)
all	2319719	2021-07-01	VOC Delta GK (B.1.617.2+AY.*)	GK	AY.112	1	GK-AY.112	21J (Delta)
all	2319719	2021-08-01	VOC Delta GK (B.1.617.2+AY.*)	GK	AY.112	1	GK-AY.112	21J (Delta)
all	2319719	2021-11-01	VOC Delta GK (B.1.617.2+AY.*)	GK	AY.112	1	GK-AY.112	21J (Delta)
all	8419316	2021-07-01	VOC Delta GK (B.1.617.2+AY.*)	GK	AY.112	4	GK-AY.112	21J (Delta)
all	8419316	2021-08-01	VOC Delta GK (B.1.617.2+AY.*)	G	AY.112	1	G-AY.112	21J (Delta)
all	8419316	2021-08-01	VOC Delta GK (B.1.617.2+AY.*)	GK	AY.112	6	GK-AY.112	21J (Delta)
all	8419316	2021-09-01	VOC Delta GK (B.1.617.2+AY.*)	GK	AY.112	6	GK-AY.112	21J (Delta)
all	8419316	2021-10-01	VOC Delta GK (B.1.617.2+AY.*)	GK	AY.112	4	GK-AY.112	21J (Delta)
all	8419316	2021-11-01	VOC Delta GK (B.1.617.2+AY.*)	GK	AY.112	7	GK-AY.112	21J (Delta)
all	8419316	2021-12-01	VOC Delta GK (B.1.617.2+AY.*)	G	AY.112	1	G-AY.112	21J (Delta)
all	8419316	2021-12-01	VOC Delta GK (B.1.617.2+AY.*)	GK	AY.112	10	GK-AY.112	21J (Delta)
all	8419316	2021-12-01	VOC Omicron GRA (B.1.1.529+BA.*)	GRA	AY.112	1	GRA-AY.112	21J (Delta)
all	1382480	2021-08-01	VOC Delta GK (B.1.617.2+AY.*)	GK	AY.112	1	GK-AY.112	21J (Delta)
all	1382480	2021-09-01	VOC Delta GK (B.1.617.2+AY.*)	GK	AY.112	7	GK-AY.112	21J (Delta)
all	1382480	2021-10-01	VOC Delta GK (B.1.617.2+AY.*)	GK	AY.112	1	GK-AY.112	21J (Delta)
all	14570000	2021-05-01	VOC Delta GK (B.1.617.2+AY.*)	GK	AY.112	1	GK-AY.112	21J (Delta)
all	14570000	2021-06-01	VOC Delta GK (B.1.617.2+AY.*)	G	AY.112	1	G-AY.112	21J (Delta)
all	14570000	2021-06-01	VOC Delta GK (B.1.617.2+AY.*)	GK	AY.112	10	GK-AY.112	21J (Delta)
all	14570000	2021-07-01	VOC Delta GK (B.1.617.2+AY.*)	GK	AY.112	2	GK-AY.112	21J (Delta)
all	14570000	2021-08-01	VOC Delta GK (B.1.617.2+AY.*)	GK	AY.112	11	GK-AY.112	21J (Delta)
all	14570000	2021-09-01	VOC Delta GK (B.1.617.2+AY.*)	GK	AY.112	4	GK-AY.112	21J (Delta)
all	14570000	2021-12-01	VOC Delta GK (B.1.617.2+AY.*)	GK	AY.112	2	GK-AY.112	21J (Delta)
all	8419316	2021-11-01	VOC Delta GK (B.1.617.2+AY.*)	GK	AY.112.2	2	GK-AY.112.2	NA
all	14570000	2021-12-01	VOC Delta GK (B.1.617.2+AY.*)	GK	AY.112.2	1	GK-AY.112.2	NA
all	1083201	2021-09-01	VOC Delta GK (B.1.617.2+AY.*)	GK	AY.113	1	GK-AY.113	21J (Delta)
all	1083201	2021-12-01	VOC Delta GK (B.1.617.2+AY.*)	GK	AY.113	1	GK-AY.113	21J (Delta)
all	777706	2021-10-01	VOC Delta GK (B.1.617.2+AY.*)	GK	AY.113	1	GK-AY.113	21J (Delta)
all	1205380	2021-09-01	VOC Delta GK (B.1.617.2+AY.*)	GK	AY.113	3	GK-AY.113	21J (Delta)
all	2840341	2021-10-01	VOC Delta GK (B.1.617.2+AY.*)	GK	AY.113	1	GK-AY.113	21J (Delta)
all	2319719	2021-08-01	VOC Delta GK (B.1.617.2+AY.*)	GK	AY.113	2	GK-AY.113	21J (Delta)
all	2319719	2021-09-01	VOC Delta GK (B.1.617.2+AY.*)	GK	AY.113	3	GK-AY.113	21J (Delta)
all	2319719	2021-10-01	VOC Delta GK (B.1.617.2+AY.*)	GK	AY.113	2	GK-AY.113	21J (Delta)
all	2319719	2021-11-01	VOC Delta GK (B.1.617.2+AY.*)	GK	AY.113	3	GK-AY.113	21J (Delta)
all	2319719	2021-12-01	VOC Delta GK (B.1.617.2+AY.*)	GK	AY.113	2	GK-AY.113	21J (Delta)
all	8419316	2021-07-01	VOC Delta GK (B.1.617.2+AY.*)	GK	AY.113	19	GK-AY.113	21J (Delta)
all	8419316	2021-08-01	VOC Delta GK (B.1.617.2+AY.*)	G	AY.113	4	G-AY.113	21J (Delta)
all	8419316	2021-08-01	VOC Delta GK (B.1.617.2+AY.*)	GK	AY.113	92	GK-AY.113	21J (Delta)
all	8419316	2021-08-01	VOC Delta GK (B.1.617.2+AY.*)	O	AY.113	1	O-AY.113	21J (Delta)
all	8419316	2021-09-01	VOC Delta GK (B.1.617.2+AY.*)	G	AY.113	8	G-AY.113	21J (Delta)
all	8419316	2021-09-01	VOC Delta GK (B.1.617.2+AY.*)	GK	AY.113	124	GK-AY.113	21J (Delta)
all	8419316	2021-09-01	VOC Delta GK (B.1.617.2+AY.*)	O	AY.113	1	O-AY.113	21J (Delta)
all	8419316	2021-10-01	VOC Delta GK (B.1.617.2+AY.*)	G	AY.113	5	G-AY.113	21J (Delta)
all	8419316	2021-10-01	VOC Delta GK (B.1.617.2+AY.*)	GK	AY.113	64	GK-AY.113	21J (Delta)
all	8419316	2021-11-01	VOC Delta GK (B.1.617.2+AY.*)	G	AY.113	3	G-AY.113	21J (Delta)
all	8419316	2021-11-01	VOC Delta GK (B.1.617.2+AY.*)	GK	AY.113	48	GK-AY.113	21J (Delta)
all	8419316	2021-12-01	VOC Delta GK (B.1.617.2+AY.*)	G	AY.113	4	G-AY.113	21J (Delta)
all	8419316	2021-12-01	VOC Delta GK (B.1.617.2+AY.*)	GK	AY.113	27	GK-AY.113	21J (Delta)
all	1382480	2021-10-01	VOC Delta GK (B.1.617.2+AY.*)	GK	AY.113	1	GK-AY.113	21J (Delta)
all	1382480	2021-11-01	VOC Delta GK (B.1.617.2+AY.*)	GK	AY.113	1	GK-AY.113	21J (Delta)
all	1382480	2021-12-01	VOC Delta GK (B.1.617.2+AY.*)	GK	AY.113	4	GK-AY.113	21J (Delta)
all	14570000	2021-08-01	VOC Delta GK (B.1.617.2+AY.*)	GK	AY.113	1	GK-AY.113	21J (Delta)
all	14570000	2021-09-01	VOC Delta GK (B.1.617.2+AY.*)	GK	AY.113	1	GK-AY.113	21J (Delta)
all	14570000	2021-12-01	VOC Delta GK (B.1.617.2+AY.*)	GK	AY.113	3	GK-AY.113	21J (Delta)
all	1083201	2021-08-01	VOC Delta GK (B.1.617.2+AY.*)	GK	AY.114	1	GK-AY.114	21J (Delta)
all	777706	2021-09-01	VOC Delta GK (B.1.617.2+AY.*)	GK	AY.114	1	GK-AY.114	21J (Delta)
all	1205380	2021-07-01	VOC Delta GK (B.1.617.2+AY.*)	GK	AY.114	6	GK-AY.114	21J (Delta)
all	1205380	2021-08-01	VOC Delta GK (B.1.617.2+AY.*)	G	AY.114	1	G-AY.114	21J (Delta)
all	1205380	2021-08-01	VOC Delta GK (B.1.617.2+AY.*)	GK	AY.114	17	GK-AY.114	21J (Delta)
all	1205380	2021-08-01	VOC Delta GK (B.1.617.2+AY.*)	O	AY.114	1	O-AY.114	21J (Delta)
all	1205380	2021-09-01	VOC Delta GK (B.1.617.2+AY.*)	G	AY.114	2	G-AY.114	21J (Delta)
all	1205380	2021-09-01	VOC Delta GK (B.1.617.2+AY.*)	GK	AY.114	5	GK-AY.114	21J (Delta)
all	2840341	2021-08-01	VOC Delta GK (B.1.617.2+AY.*)	GK	AY.114	1	GK-AY.114	21J (Delta)
all	2840341	2021-12-01	VOC Delta GK (B.1.617.2+AY.*)	GK	AY.114	1	GK-AY.114	21J (Delta)
all	2319719	2021-07-01	VOC Delta GK (B.1.617.2+AY.*)	GK	AY.114	1	GK-AY.114	21J (Delta)
all	2319719	2021-09-01	VOC Delta GK (B.1.617.2+AY.*)	GK	AY.114	1	GK-AY.114	21J (Delta)
all	2319719	2021-12-01	VOC Delta GK (B.1.617.2+AY.*)	GK	AY.114	1	GK-AY.114	21J (Delta)
all	8419316	2021-07-01	VOC Delta GK (B.1.617.2+AY.*)	GK	AY.114	12	GK-AY.114	21J (Delta)
all	8419316	2021-08-01	VOC Delta GK (B.1.617.2+AY.*)	GK	AY.114	21	GK-AY.114	21J (Delta)
all	8419316	2021-09-01	VOC Delta GK (B.1.617.2+AY.*)	G	AY.114	2	G-AY.114	21J (Delta)
all	8419316	2021-09-01	VOC Delta GK (B.1.617.2+AY.*)	GK	AY.114	19	GK-AY.114	21J (Delta)
all	8419316	2021-09-01	VOC Delta GK (B.1.617.2+AY.*)	O	AY.114	1	O-AY.114	21J (Delta)
all	8419316	2021-10-01	VOC Delta GK (B.1.617.2+AY.*)	GK	AY.114	12	GK-AY.114	21J (Delta)
all	8419316	2021-10-01	VOC Delta GK (B.1.617.2+AY.*)	O	AY.114	1	O-AY.114	21J (Delta)
all	8419316	2021-11-01	VOC Delta GK (B.1.617.2+AY.*)	GK	AY.114	2	GK-AY.114	21J (Delta)
all	8419316	2021-12-01	VOC Delta GK (B.1.617.2+AY.*)	GK	AY.114	2	GK-AY.114	21J (Delta)
all	1382480	2021-06-01	VOC Delta GK (B.1.617.2+AY.*)	O	AY.114	1	O-AY.114	21J (Delta)
all	1382480	2021-07-01	VOC Delta GK (B.1.617.2+AY.*)	GK	AY.114	1	GK-AY.114	21J (Delta)
all	1382480	2021-09-01	VOC Delta GK (B.1.617.2+AY.*)	GK	AY.114	1	GK-AY.114	21J (Delta)
all	1382480	2021-09-01	VOC Delta GK (B.1.617.2+AY.*)	O	AY.114	1	O-AY.114	21J (Delta)
all	14570000	2021-05-01	VOC Delta GK (B.1.617.2+AY.*)	GK	AY.114	2	GK-AY.114	21J (Delta)
all	14570000	2021-06-01	VOC Delta GK (B.1.617.2+AY.*)	G	AY.114	2	G-AY.114	21J (Delta)
all	14570000	2021-06-01	VOC Delta GK (B.1.617.2+AY.*)	GK	AY.114	14	GK-AY.114	21J (Delta)
all	14570000	2021-07-01	VOC Delta GK (B.1.617.2+AY.*)	GK	AY.114	3	GK-AY.114	21J (Delta)
all	8419316	2021-07-01	VOC Delta GK (B.1.617.2+AY.*)	GK	AY.116	3	GK-AY.116	21J (Delta)
all	8419316	2021-08-01	VOC Delta GK (B.1.617.2+AY.*)	GK	AY.116	1	GK-AY.116	21J (Delta)
all	8419316	2021-11-01	VOC Delta GK (B.1.617.2+AY.*)	GK	AY.116	1	GK-AY.116	21J (Delta)
all	14570000	2021-12-01	VOC Delta GK (B.1.617.2+AY.*)	GK	AY.116	1	GK-AY.116	21J (Delta)
all	1205380	2021-08-01	VOC Delta GK (B.1.617.2+AY.*)	GK	AY.116.1	3	GK-AY.116.1	21J (Delta)
all	1205380	2021-12-01	VOC Delta GK (B.1.617.2+AY.*)	GK	AY.116.1	1	GK-AY.116.1	21J (Delta)
all	2319719	2021-09-01	VOC Delta GK (B.1.617.2+AY.*)	GK	AY.116.1	1	GK-AY.116.1	21J (Delta)
all	8419316	2021-07-01	VOC Delta GK (B.1.617.2+AY.*)	GK	AY.116.1	4	GK-AY.116.1	21J (Delta)
all	8419316	2021-08-01	VOC Delta GK (B.1.617.2+AY.*)	GK	AY.116.1	13	GK-AY.116.1	21J (Delta)
all	8419316	2021-09-01	VOC Delta GK (B.1.617.2+AY.*)	G	AY.116.1	1	G-AY.116.1	21J (Delta)
all	8419316	2021-09-01	VOC Delta GK (B.1.617.2+AY.*)	GK	AY.116.1	11	GK-AY.116.1	21J (Delta)
all	8419316	2021-10-01	VOC Delta GK (B.1.617.2+AY.*)	GK	AY.116.1	3	GK-AY.116.1	21J (Delta)
all	8419316	2021-11-01	VOC Delta GK (B.1.617.2+AY.*)	GK	AY.116.1	2	GK-AY.116.1	21J (Delta)
all	8419316	2021-12-01	VOC Delta GK (B.1.617.2+AY.*)	GK	AY.116.1	2	GK-AY.116.1	21J (Delta)
all	1382480	2021-07-01	VOC Delta GK (B.1.617.2+AY.*)	GK	AY.116.1	1	GK-AY.116.1	21J (Delta)
all	1382480	2021-08-01	VOC Delta GK (B.1.617.2+AY.*)	GK	AY.116.1	1	GK-AY.116.1	21J (Delta)
all	1382480	2021-10-01	VOC Delta GK (B.1.617.2+AY.*)	GK	AY.116.1	3	GK-AY.116.1	21J (Delta)
all	1382480	2021-11-01	VOC Delta GK (B.1.617.2+AY.*)	GK	AY.116.1	1	GK-AY.116.1	21J (Delta)
all	1083201	2021-09-01	VOC Delta GK (B.1.617.2+AY.*)	GK	AY.117	2	GK-AY.117	21J (Delta)
all	1083201	2021-10-01	VOC Delta GK (B.1.617.2+AY.*)	GK	AY.117	1	GK-AY.117	21J (Delta)
all	1083201	2021-11-01	VOC Delta GK (B.1.617.2+AY.*)	GK	AY.117	1	GK-AY.117	21J (Delta)
all	777706	2021-12-01	VOC Delta GK (B.1.617.2+AY.*)	GK	AY.117	5	GK-AY.117	21J (Delta)
all	1205380	2021-09-01	VOC Delta GK (B.1.617.2+AY.*)	GK	AY.117	6	GK-AY.117	21J (Delta)
all	1205380	2021-10-01	VOC Delta GK (B.1.617.2+AY.*)	GK	AY.117	7	GK-AY.117	21J (Delta)
all	1205380	2021-11-01	VOC Delta GK (B.1.617.2+AY.*)	GK	AY.117	11	GK-AY.117	21J (Delta)
all	1205380	2021-12-01	VOC Delta GK (B.1.617.2+AY.*)	GK	AY.117	16	GK-AY.117	21J (Delta)
all	2319719	2021-08-01	VOC Delta GK (B.1.617.2+AY.*)	GK	AY.117	1	GK-AY.117	21J (Delta)
all	2319719	2021-10-01	VOC Delta GK (B.1.617.2+AY.*)	G	AY.117	2	G-AY.117	21J (Delta)
all	2319719	2021-10-01	VOC Delta GK (B.1.617.2+AY.*)	GK	AY.117	1	GK-AY.117	21J (Delta)
all	2319719	2021-11-01	VOC Delta GK (B.1.617.2+AY.*)	GK	AY.117	2	GK-AY.117	21J (Delta)
all	2319719	2021-12-01	VOC Delta GK (B.1.617.2+AY.*)	GK	AY.117	2	GK-AY.117	21J (Delta)
all	8419316	2021-08-01	VOC Delta GK (B.1.617.2+AY.*)	GK	AY.117	9	GK-AY.117	21J (Delta)
all	8419316	2021-09-01	VOC Delta GK (B.1.617.2+AY.*)	G	AY.117	3	G-AY.117	21J (Delta)
all	8419316	2021-09-01	VOC Delta GK (B.1.617.2+AY.*)	GK	AY.117	14	GK-AY.117	21J (Delta)
all	8419316	2021-10-01	VOC Delta GK (B.1.617.2+AY.*)	G	AY.117	2	G-AY.117	21J (Delta)
all	8419316	2021-10-01	VOC Delta GK (B.1.617.2+AY.*)	GK	AY.117	33	GK-AY.117	21J (Delta)
all	8419316	2021-11-01	VOC Delta GK (B.1.617.2+AY.*)	G	AY.117	2	G-AY.117	21J (Delta)
all	8419316	2021-11-01	VOC Delta GK (B.1.617.2+AY.*)	GK	AY.117	83	GK-AY.117	21J (Delta)
all	8419316	2021-12-01	VOC Delta GK (B.1.617.2+AY.*)	G	AY.117	1	G-AY.117	21J (Delta)
all	8419316	2021-12-01	VOC Delta GK (B.1.617.2+AY.*)	GK	AY.117	63	GK-AY.117	21J (Delta)
all	636657	2021-10-01	VOC Delta GK (B.1.617.2+AY.*)	GK	AY.117	1	GK-AY.117	21J (Delta)
all	636657	2021-11-01	VOC Delta GK (B.1.617.2+AY.*)	GK	AY.117	1	GK-AY.117	21J (Delta)
all	1382480	2021-09-01	VOC Delta GK (B.1.617.2+AY.*)	GK	AY.117	2	GK-AY.117	21J (Delta)
all	1382480	2021-10-01	VOC Delta GK (B.1.617.2+AY.*)	GK	AY.117	4	GK-AY.117	21J (Delta)
all	1382480	2021-11-01	VOC Delta GK (B.1.617.2+AY.*)	GK	AY.117	11	GK-AY.117	21J (Delta)
all	1382480	2021-12-01	VOC Delta GK (B.1.617.2+AY.*)	GK	AY.117	15	GK-AY.117	21J (Delta)
all	14570000	2021-08-01	VOC Delta GK (B.1.617.2+AY.*)	GK	AY.117	1	GK-AY.117	21J (Delta)
all	14570000	2021-11-01	VOC Delta GK (B.1.617.2+AY.*)	GK	AY.117	4	GK-AY.117	21J (Delta)
all	14570000	2021-12-01	VOC Delta GK (B.1.617.2+AY.*)	GK	AY.117	10	GK-AY.117	21J (Delta)
all	1083201	2021-08-01	VOC Delta GK (B.1.617.2+AY.*)	GK	AY.118	3	GK-AY.118	21J (Delta)
all	1083201	2021-09-01	VOC Delta GK (B.1.617.2+AY.*)	G	AY.118	1	G-AY.118	21J (Delta)
all	1083201	2021-09-01	VOC Delta GK (B.1.617.2+AY.*)	GK	AY.118	4	GK-AY.118	21J (Delta)
all	1083201	2021-10-01	VOC Delta GK (B.1.617.2+AY.*)	GK	AY.118	1	GK-AY.118	21J (Delta)
all	1083201	2021-11-01	VOC Delta GK (B.1.617.2+AY.*)	GK	AY.118	6	GK-AY.118	21J (Delta)
all	1083201	2021-12-01	VOC Delta GK (B.1.617.2+AY.*)	GK	AY.118	2	GK-AY.118	21J (Delta)
all	777706	2021-08-01	VOC Delta GK (B.1.617.2+AY.*)	GK	AY.118	6	GK-AY.118	21J (Delta)
all	777706	2021-09-01	VOC Delta GK (B.1.617.2+AY.*)	GK	AY.118	5	GK-AY.118	21J (Delta)
all	777706	2021-11-01	VOC Delta GK (B.1.617.2+AY.*)	GK	AY.118	1	GK-AY.118	21J (Delta)
all	1205380	2021-07-01	VOC Delta GK (B.1.617.2+AY.*)	GK	AY.118	1	GK-AY.118	21J (Delta)
all	1205380	2021-08-01	VOC Delta GK (B.1.617.2+AY.*)	GK	AY.118	8	GK-AY.118	21J (Delta)
all	1205380	2021-09-01	VOC Delta GK (B.1.617.2+AY.*)	GK	AY.118	7	GK-AY.118	21J (Delta)
all	1205380	2021-10-01	VOC Delta GK (B.1.617.2+AY.*)	GK	AY.118	4	GK-AY.118	21J (Delta)
all	1205380	2021-11-01	VOC Delta GK (B.1.617.2+AY.*)	GK	AY.118	4	GK-AY.118	21J (Delta)
all	1205380	2021-12-01	VOC Delta GK (B.1.617.2+AY.*)	GK	AY.118	5	GK-AY.118	21J (Delta)
all	2840341	2021-07-01	VOC Delta GK (B.1.617.2+AY.*)	GK	AY.118	4	GK-AY.118	21J (Delta)
all	2840341	2021-08-01	VOC Delta GK (B.1.617.2+AY.*)	GK	AY.118	2	GK-AY.118	21J (Delta)
all	2840341	2021-09-01	VOC Delta GK (B.1.617.2+AY.*)	GK	AY.118	1	GK-AY.118	21J (Delta)
all	2840341	2021-10-01	VOC Delta GK (B.1.617.2+AY.*)	GK	AY.118	1	GK-AY.118	21J (Delta)
all	2319719	2021-07-01	VOC Delta GK (B.1.617.2+AY.*)	GK	AY.118	1	GK-AY.118	21J (Delta)
all	2319719	2021-08-01	VOC Delta GK (B.1.617.2+AY.*)	G	AY.118	1	G-AY.118	21J (Delta)
all	2319719	2021-08-01	VOC Delta GK (B.1.617.2+AY.*)	GK	AY.118	1	GK-AY.118	21J (Delta)
all	2319719	2021-09-01	VOC Delta GK (B.1.617.2+AY.*)	G	AY.118	1	G-AY.118	21J (Delta)
all	2319719	2021-09-01	VOC Delta GK (B.1.617.2+AY.*)	GK	AY.118	1	GK-AY.118	21J (Delta)
all	2319719	2021-11-01	VOC Delta GK (B.1.617.2+AY.*)	GK	AY.118	4	GK-AY.118	21J (Delta)
all	2319719	2021-12-01	VOC Delta GK (B.1.617.2+AY.*)	GK	AY.118	3	GK-AY.118	21J (Delta)
all	8419316	2021-06-01	VOC Delta GK (B.1.617.2+AY.*)	GK	AY.118	4	GK-AY.118	21J (Delta)
all	8419316	2021-07-01	VOC Delta GK (B.1.617.2+AY.*)	G	AY.118	1	G-AY.118	21J (Delta)
all	8419316	2021-07-01	VOC Delta GK (B.1.617.2+AY.*)	GK	AY.118	116	GK-AY.118	21J (Delta)
all	8419316	2021-08-01	VOC Delta GK (B.1.617.2+AY.*)	G	AY.118	7	G-AY.118	21J (Delta)
all	8419316	2021-08-01	VOC Delta GK (B.1.617.2+AY.*)	GK	AY.118	184	GK-AY.118	21J (Delta)
all	8419316	2021-08-01	VOC Delta GK (B.1.617.2+AY.*)	O	AY.118	1	O-AY.118	21J (Delta)
all	8419316	2021-09-01	VOC Delta GK (B.1.617.2+AY.*)	G	AY.118	7	G-AY.118	21J (Delta)
all	8419316	2021-09-01	VOC Delta GK (B.1.617.2+AY.*)	GK	AY.118	144	GK-AY.118	21J (Delta)
all	8419316	2021-09-01	VOC Delta GK (B.1.617.2+AY.*)	O	AY.118	2	O-AY.118	21J (Delta)
all	8419316	2021-10-01	VOC Delta GK (B.1.617.2+AY.*)	G	AY.118	3	G-AY.118	21J (Delta)
all	8419316	2021-10-01	VOC Delta GK (B.1.617.2+AY.*)	GK	AY.118	69	GK-AY.118	21J (Delta)
all	8419316	2021-10-01	VOC Delta GK (B.1.617.2+AY.*)	O	AY.118	1	O-AY.118	21J (Delta)
all	8419316	2021-11-01	VOC Delta GK (B.1.617.2+AY.*)	G	AY.118	1	G-AY.118	21J (Delta)
all	8419316	2021-11-01	VOC Delta GK (B.1.617.2+AY.*)	GK	AY.118	123	GK-AY.118	21J (Delta)
all	8419316	2021-12-01	VOC Delta GK (B.1.617.2+AY.*)	G	AY.118	2	G-AY.118	21J (Delta)
all	8419316	2021-12-01	VOC Delta GK (B.1.617.2+AY.*)	GK	AY.118	69	GK-AY.118	21J (Delta)
all	636657	2021-11-01	VOC Delta GK (B.1.617.2+AY.*)	GK	AY.118	1	GK-AY.118	21J (Delta)
all	636657	2021-12-01	VOC Delta GK (B.1.617.2+AY.*)	GK	AY.118	2	GK-AY.118	21J (Delta)
all	1382480	2021-07-01	VOC Delta GK (B.1.617.2+AY.*)	GK	AY.118	3	GK-AY.118	21J (Delta)
all	1382480	2021-08-01	VOC Delta GK (B.1.617.2+AY.*)	GK	AY.118	17	GK-AY.118	21J (Delta)
all	1382480	2021-09-01	VOC Delta GK (B.1.617.2+AY.*)	G	AY.118	1	G-AY.118	21J (Delta)
all	1382480	2021-09-01	VOC Delta GK (B.1.617.2+AY.*)	GK	AY.118	20	GK-AY.118	21J (Delta)
all	1382480	2021-10-01	VOC Delta GK (B.1.617.2+AY.*)	GK	AY.118	24	GK-AY.118	21J (Delta)
all	1382480	2021-11-01	VOC Delta GK (B.1.617.2+AY.*)	GK	AY.118	44	GK-AY.118	21J (Delta)
all	1382480	2021-12-01	VOC Delta GK (B.1.617.2+AY.*)	GK	AY.118	26	GK-AY.118	21J (Delta)
all	14570000	2021-09-01	VOC Delta GK (B.1.617.2+AY.*)	GK	AY.118	1	GK-AY.118	21J (Delta)
all	14570000	2021-11-01	VOC Delta GK (B.1.617.2+AY.*)	GK	AY.118	1	GK-AY.118	21J (Delta)
all	14570000	2021-12-01	VOC Delta GK (B.1.617.2+AY.*)	GK	AY.118	6	GK-AY.118	21J (Delta)
all	1083201	2021-08-01	VOC Delta GK (B.1.617.2+AY.*)	G	AY.119	1	G-AY.119	21J (Delta)
all	1083201	2021-08-01	VOC Delta GK (B.1.617.2+AY.*)	GK	AY.119	8	GK-AY.119	21J (Delta)
all	1083201	2021-09-01	VOC Delta GK (B.1.617.2+AY.*)	G	AY.119	4	G-AY.119	21J (Delta)
all	1083201	2021-09-01	VOC Delta GK (B.1.617.2+AY.*)	GK	AY.119	21	GK-AY.119	21J (Delta)
all	1083201	2021-10-01	VOC Delta GK (B.1.617.2+AY.*)	G	AY.119	3	G-AY.119	21J (Delta)
all	1083201	2021-10-01	VOC Delta GK (B.1.617.2+AY.*)	GK	AY.119	11	GK-AY.119	21J (Delta)
all	1083201	2021-11-01	VOC Delta GK (B.1.617.2+AY.*)	GK	AY.119	17	GK-AY.119	21J (Delta)
all	1083201	2021-12-01	VOC Delta GK (B.1.617.2+AY.*)	GK	AY.119	5	GK-AY.119	21J (Delta)
all	777706	2021-08-01	VOC Delta GK (B.1.617.2+AY.*)	GK	AY.119	1	GK-AY.119	21J (Delta)
all	777706	2021-09-01	VOC Delta GK (B.1.617.2+AY.*)	GK	AY.119	7	GK-AY.119	21J (Delta)
all	777706	2021-10-01	VOC Delta GK (B.1.617.2+AY.*)	GK	AY.119	11	GK-AY.119	21J (Delta)
all	777706	2021-11-01	VOC Delta GK (B.1.617.2+AY.*)	GK	AY.119	10	GK-AY.119	21J (Delta)
all	777706	2021-12-01	VOC Delta GK (B.1.617.2+AY.*)	GK	AY.119	3	GK-AY.119	21J (Delta)
all	1205380	2021-07-01	VOC Delta GK (B.1.617.2+AY.*)	G	AY.119	1	G-AY.119	21J (Delta)
all	1205380	2021-07-01	VOC Delta GK (B.1.617.2+AY.*)	GK	AY.119	2	GK-AY.119	21J (Delta)
all	1205380	2021-08-01	VOC Delta GK (B.1.617.2+AY.*)	GK	AY.119	20	GK-AY.119	21J (Delta)
all	1205380	2021-09-01	VOC Delta GK (B.1.617.2+AY.*)	G	AY.119	2	G-AY.119	21J (Delta)
all	1205380	2021-09-01	VOC Delta GK (B.1.617.2+AY.*)	GK	AY.119	22	GK-AY.119	21J (Delta)
all	1205380	2021-10-01	VOC Delta GK (B.1.617.2+AY.*)	GK	AY.119	10	GK-AY.119	21J (Delta)
all	1205380	2021-11-01	VOC Delta GK (B.1.617.2+AY.*)	GK	AY.119	7	GK-AY.119	21J (Delta)
all	1205380	2021-12-01	VOC Delta GK (B.1.617.2+AY.*)	GK	AY.119	3	GK-AY.119	21J (Delta)
all	2840341	2021-06-01	VOC Delta GK (B.1.617.2+AY.*)	GK	AY.119	1	GK-AY.119	21J (Delta)
all	2840341	2021-07-01	VOC Delta GK (B.1.617.2+AY.*)	GK	AY.119	8	GK-AY.119	21J (Delta)
all	2840341	2021-08-01	VOC Delta GK (B.1.617.2+AY.*)	GK	AY.119	1	GK-AY.119	21J (Delta)
all	2840341	2021-09-01	VOC Delta GK (B.1.617.2+AY.*)	GK	AY.119	2	GK-AY.119	21J (Delta)
all	2840341	2021-10-01	VOC Delta GK (B.1.617.2+AY.*)	G	AY.119	1	G-AY.119	21J (Delta)
all	2840341	2021-10-01	VOC Delta GK (B.1.617.2+AY.*)	GK	AY.119	2	GK-AY.119	21J (Delta)
all	2840341	2021-11-01	VOC Delta GK (B.1.617.2+AY.*)	GK	AY.119	3	GK-AY.119	21J (Delta)
all	2840341	2021-12-01	VOC Delta GK (B.1.617.2+AY.*)	GK	AY.119	2	GK-AY.119	21J (Delta)
all	2319719	2021-07-01	VOC Delta GK (B.1.617.2+AY.*)	GK	AY.119	7	GK-AY.119	21J (Delta)
all	2319719	2021-08-01	VOC Delta GK (B.1.617.2+AY.*)	G	AY.119	1	G-AY.119	21J (Delta)
all	2319719	2021-08-01	VOC Delta GK (B.1.617.2+AY.*)	GK	AY.119	10	GK-AY.119	21J (Delta)
all	2319719	2021-09-01	VOC Delta GK (B.1.617.2+AY.*)	GK	AY.119	4	GK-AY.119	21J (Delta)
all	2319719	2021-10-01	VOC Delta GK (B.1.617.2+AY.*)	G	AY.119	1	G-AY.119	21J (Delta)
all	2319719	2021-10-01	VOC Delta GK (B.1.617.2+AY.*)	GK	AY.119	6	GK-AY.119	21J (Delta)
all	2319719	2021-11-01	VOC Delta GK (B.1.617.2+AY.*)	GK	AY.119	13	GK-AY.119	21J (Delta)
all	2319719	2021-12-01	VOC Delta GK (B.1.617.2+AY.*)	GK	AY.119	2	GK-AY.119	21J (Delta)
all	486158	2021-07-01	VOC Delta GK (B.1.617.2+AY.*)	GK	AY.119	1	GK-AY.119	21J (Delta)
all	486158	2021-08-01	VOC Delta GK (B.1.617.2+AY.*)	GK	AY.119	1	GK-AY.119	21J (Delta)
all	486158	2021-09-01	VOC Delta GK (B.1.617.2+AY.*)	G	AY.119	2	G-AY.119	21J (Delta)
all	486158	2021-10-01	VOC Delta GK (B.1.617.2+AY.*)	G	AY.119	1	G-AY.119	21J (Delta)
all	486158	2021-10-01	VOC Delta GK (B.1.617.2+AY.*)	GK	AY.119	1	GK-AY.119	21J (Delta)
all	486158	2021-11-01	VOC Delta GK (B.1.617.2+AY.*)	G	AY.119	1	G-AY.119	21J (Delta)
all	8419316	2021-05-01	VOC Delta GK (B.1.617.2+AY.*)	GK	AY.119	1	GK-AY.119	21J (Delta)
all	8419316	2021-06-01	VOC Delta GK (B.1.617.2+AY.*)	GK	AY.119	34	GK-AY.119	21J (Delta)
all	8419316	2021-07-01	VOC Delta GK (B.1.617.2+AY.*)	G	AY.119	1	G-AY.119	21J (Delta)
all	8419316	2021-07-01	VOC Delta GK (B.1.617.2+AY.*)	GK	AY.119	137	GK-AY.119	21J (Delta)
all	8419316	2021-07-01	VOC Delta GK (B.1.617.2+AY.*)	O	AY.119	1	O-AY.119	21J (Delta)
all	8419316	2021-08-01	VOC Delta GK (B.1.617.2+AY.*)	G	AY.119	11	G-AY.119	21J (Delta)
all	8419316	2021-08-01	VOC Delta GK (B.1.617.2+AY.*)	GK	AY.119	394	GK-AY.119	21J (Delta)
all	8419316	2021-08-01	VOC Delta GK (B.1.617.2+AY.*)	O	AY.119	3	O-AY.119	21J (Delta)
all	8419316	2021-09-01	VOC Delta GK (B.1.617.2+AY.*)	G	AY.119	10	G-AY.119	21J (Delta)
all	8419316	2021-09-01	VOC Delta GK (B.1.617.2+AY.*)	GK	AY.119	382	GK-AY.119	21J (Delta)
all	8419316	2021-09-01	VOC Delta GK (B.1.617.2+AY.*)	O	AY.119	4	O-AY.119	21J (Delta)
all	8419316	2021-10-01	VOC Delta GK (B.1.617.2+AY.*)	G	AY.119	10	G-AY.119	21J (Delta)
all	8419316	2021-10-01	VOC Delta GK (B.1.617.2+AY.*)	GK	AY.119	380	GK-AY.119	21J (Delta)
all	8419316	2021-10-01	VOC Delta GK (B.1.617.2+AY.*)	O	AY.119	4	O-AY.119	21J (Delta)
all	8419316	2021-11-01	VOC Delta GK (B.1.617.2+AY.*)	G	AY.119	5	G-AY.119	21J (Delta)
all	8419316	2021-11-01	VOC Delta GK (B.1.617.2+AY.*)	GK	AY.119	393	GK-AY.119	21J (Delta)
all	8419316	2021-11-01	VOC Delta GK (B.1.617.2+AY.*)	O	AY.119	4	O-AY.119	21J (Delta)
all	8419316	2021-12-01	VOC Delta GK (B.1.617.2+AY.*)	G	AY.119	11	G-AY.119	21J (Delta)
all	8419316	2021-12-01	VOC Delta GK (B.1.617.2+AY.*)	GK	AY.119	214	GK-AY.119	21J (Delta)
all	8419316	2021-12-01	VOC Delta GK (B.1.617.2+AY.*)	O	AY.119	2	O-AY.119	21J (Delta)
all	421361	2021-08-01	VOC Delta GK (B.1.617.2+AY.*)	GK	AY.119	4	GK-AY.119	21J (Delta)
all	421361	2021-11-01	VOC Delta GK (B.1.617.2+AY.*)	GK	AY.119	1	GK-AY.119	21J (Delta)
all	421361	2021-12-01	VOC Delta GK (B.1.617.2+AY.*)	GK	AY.119	1	GK-AY.119	21J (Delta)
all	636657	2021-10-01	VOC Delta GK (B.1.617.2+AY.*)	G	AY.119	1	G-AY.119	21J (Delta)
all	636657	2021-10-01	VOC Delta GK (B.1.617.2+AY.*)	GK	AY.119	1	GK-AY.119	21J (Delta)
all	636657	2021-11-01	VOC Delta GK (B.1.617.2+AY.*)	GK	AY.119	3	GK-AY.119	21J (Delta)
all	1382480	2021-07-01	VOC Delta GK (B.1.617.2+AY.*)	GK	AY.119	4	GK-AY.119	21J (Delta)
all	1382480	2021-08-01	VOC Delta GK (B.1.617.2+AY.*)	G	AY.119	1	G-AY.119	21J (Delta)
all	1382480	2021-08-01	VOC Delta GK (B.1.617.2+AY.*)	GK	AY.119	36	GK-AY.119	21J (Delta)
all	1382480	2021-09-01	VOC Delta GK (B.1.617.2+AY.*)	GK	AY.119	55	GK-AY.119	21J (Delta)
all	1382480	2021-10-01	VOC Delta GK (B.1.617.2+AY.*)	G	AY.119	2	G-AY.119	21J (Delta)
all	1382480	2021-10-01	VOC Delta GK (B.1.617.2+AY.*)	GK	AY.119	28	GK-AY.119	21J (Delta)
all	1382480	2021-11-01	VOC Delta GK (B.1.617.2+AY.*)	GK	AY.119	27	GK-AY.119	21J (Delta)
all	1382480	2021-11-01	VOC Delta GK (B.1.617.2+AY.*)	O	AY.119	1	O-AY.119	21J (Delta)
all	1382480	2021-12-01	VOC Delta GK (B.1.617.2+AY.*)	GK	AY.119	14	GK-AY.119	21J (Delta)
all	14570000	2021-08-01	VOC Delta GK (B.1.617.2+AY.*)	GK	AY.119	9	GK-AY.119	21J (Delta)
all	14570000	2021-09-01	VOC Delta GK (B.1.617.2+AY.*)	G	AY.119	2	G-AY.119	21J (Delta)
all	14570000	2021-09-01	VOC Delta GK (B.1.617.2+AY.*)	GK	AY.119	13	GK-AY.119	21J (Delta)
all	14570000	2021-10-01	VOC Delta GK (B.1.617.2+AY.*)	GK	AY.119	2	GK-AY.119	21J (Delta)
all	14570000	2021-11-01	VOC Delta GK (B.1.617.2+AY.*)	GK	AY.119	21	GK-AY.119	21J (Delta)
all	14570000	2021-12-01	VOC Delta GK (B.1.617.2+AY.*)	G	AY.119	3	G-AY.119	21J (Delta)
all	14570000	2021-12-01	VOC Delta GK (B.1.617.2+AY.*)	GK	AY.119	21	GK-AY.119	21J (Delta)
all	8419316	2021-10-01	VOC Delta GK (B.1.617.2+AY.*)	GK	AY.119.1	1	GK-AY.119.1	NA
all	8419316	2021-11-01	VOC Delta GK (B.1.617.2+AY.*)	GK	AY.119.1	1	GK-AY.119.1	NA
all	8419316	2021-11-01	VOC Delta GK (B.1.617.2+AY.*)	O	AY.119.1	1	O-AY.119.1	NA
all	8419316	2021-12-01	VOC Delta GK (B.1.617.2+AY.*)	GK	AY.119.1	1	GK-AY.119.1	NA
all	14570000	2021-12-01	VOC Delta GK (B.1.617.2+AY.*)	GK	AY.119.1	2	GK-AY.119.1	NA
all	1083201	2021-08-01	VOC Delta GK (B.1.617.2+AY.*)	GK	AY.119.2	2	GK-AY.119.2	21J (Delta)
all	1083201	2021-09-01	VOC Delta GK (B.1.617.2+AY.*)	GK	AY.119.2	2	GK-AY.119.2	21J (Delta)
all	777706	2021-10-01	VOC Delta GK (B.1.617.2+AY.*)	GK	AY.119.2	3	GK-AY.119.2	21J (Delta)
all	777706	2021-11-01	VOC Delta GK (B.1.617.2+AY.*)	GK	AY.119.2	1	GK-AY.119.2	21J (Delta)
all	1205380	2021-08-01	VOC Delta GK (B.1.617.2+AY.*)	GK	AY.119.2	3	GK-AY.119.2	21J (Delta)
all	1205380	2021-09-01	VOC Delta GK (B.1.617.2+AY.*)	G	AY.119.2	1	G-AY.119.2	21J (Delta)
all	1205380	2021-09-01	VOC Delta GK (B.1.617.2+AY.*)	GK	AY.119.2	1	GK-AY.119.2	21J (Delta)
all	1205380	2021-10-01	VOC Delta GK (B.1.617.2+AY.*)	GK	AY.119.2	2	GK-AY.119.2	21J (Delta)
all	1205380	2021-11-01	VOC Delta GK (B.1.617.2+AY.*)	G	AY.119.2	1	G-AY.119.2	21J (Delta)
all	1205380	2021-11-01	VOC Delta GK (B.1.617.2+AY.*)	GK	AY.119.2	2	GK-AY.119.2	21J (Delta)
all	1205380	2021-12-01	VOC Delta GK (B.1.617.2+AY.*)	GK	AY.119.2	6	GK-AY.119.2	21J (Delta)
all	2840341	2021-08-01	VOC Delta GK (B.1.617.2+AY.*)	GK	AY.119.2	2	GK-AY.119.2	21J (Delta)
all	2840341	2021-10-01	VOC Delta GK (B.1.617.2+AY.*)	GK	AY.119.2	1	GK-AY.119.2	21J (Delta)
all	2319719	2021-08-01	VOC Delta GK (B.1.617.2+AY.*)	GK	AY.119.2	2	GK-AY.119.2	21J (Delta)
all	2319719	2021-11-01	VOC Delta GK (B.1.617.2+AY.*)	GK	AY.119.2	2	GK-AY.119.2	21J (Delta)
all	8419316	2021-07-01	VOC Delta GK (B.1.617.2+AY.*)	G	AY.119.2	1	G-AY.119.2	21J (Delta)
all	8419316	2021-07-01	VOC Delta GK (B.1.617.2+AY.*)	GK	AY.119.2	32	GK-AY.119.2	21J (Delta)
all	8419316	2021-08-01	VOC Delta GK (B.1.617.2+AY.*)	G	AY.119.2	4	G-AY.119.2	21J (Delta)
all	8419316	2021-08-01	VOC Delta GK (B.1.617.2+AY.*)	GK	AY.119.2	115	GK-AY.119.2	21J (Delta)
all	8419316	2021-09-01	VOC Delta GK (B.1.617.2+AY.*)	G	AY.119.2	4	G-AY.119.2	21J (Delta)
all	8419316	2021-09-01	VOC Delta GK (B.1.617.2+AY.*)	GK	AY.119.2	70	GK-AY.119.2	21J (Delta)
all	8419316	2021-09-01	VOC Delta GK (B.1.617.2+AY.*)	O	AY.119.2	1	O-AY.119.2	21J (Delta)
all	8419316	2021-10-01	VOC Delta GK (B.1.617.2+AY.*)	G	AY.119.2	1	G-AY.119.2	21J (Delta)
all	8419316	2021-10-01	VOC Delta GK (B.1.617.2+AY.*)	GK	AY.119.2	80	GK-AY.119.2	21J (Delta)
all	8419316	2021-11-01	VOC Delta GK (B.1.617.2+AY.*)	G	AY.119.2	1	G-AY.119.2	21J (Delta)
all	8419316	2021-11-01	VOC Delta GK (B.1.617.2+AY.*)	GK	AY.119.2	52	GK-AY.119.2	21J (Delta)
all	8419316	2021-11-01	VOC Delta GK (B.1.617.2+AY.*)	O	AY.119.2	1	O-AY.119.2	21J (Delta)
all	8419316	2021-12-01	VOC Delta GK (B.1.617.2+AY.*)	GK	AY.119.2	40	GK-AY.119.2	21J (Delta)
all	8419316	2021-12-01	VOC Delta GK (B.1.617.2+AY.*)	O	AY.119.2	2	O-AY.119.2	21J (Delta)
all	421361	2021-10-01	VOC Delta GK (B.1.617.2+AY.*)	G	AY.119.2	1	G-AY.119.2	21J (Delta)
all	421361	2021-12-01	VOC Delta GK (B.1.617.2+AY.*)	GK	AY.119.2	1	GK-AY.119.2	21J (Delta)
all	1382480	2021-09-01	VOC Delta GK (B.1.617.2+AY.*)	GK	AY.119.2	4	GK-AY.119.2	21J (Delta)
all	1382480	2021-10-01	VOC Delta GK (B.1.617.2+AY.*)	GK	AY.119.2	4	GK-AY.119.2	21J (Delta)
all	1382480	2021-11-01	VOC Delta GK (B.1.617.2+AY.*)	GK	AY.119.2	2	GK-AY.119.2	21J (Delta)
all	1382480	2021-12-01	VOC Delta GK (B.1.617.2+AY.*)	GK	AY.119.2	1	GK-AY.119.2	21J (Delta)
all	14570000	2021-08-01	VOC Delta GK (B.1.617.2+AY.*)	G	AY.119.2	1	G-AY.119.2	21J (Delta)
all	14570000	2021-08-01	VOC Delta GK (B.1.617.2+AY.*)	GK	AY.119.2	8	GK-AY.119.2	21J (Delta)
all	14570000	2021-09-01	VOC Delta GK (B.1.617.2+AY.*)	GK	AY.119.2	5	GK-AY.119.2	21J (Delta)
all	14570000	2021-10-01	VOC Delta GK (B.1.617.2+AY.*)	GK	AY.119.2	11	GK-AY.119.2	21J (Delta)
all	14570000	2021-11-01	VOC Delta GK (B.1.617.2+AY.*)	G	AY.119.2	1	G-AY.119.2	21J (Delta)
all	14570000	2021-11-01	VOC Delta GK (B.1.617.2+AY.*)	GK	AY.119.2	41	GK-AY.119.2	21J (Delta)
all	14570000	2021-12-01	VOC Delta GK (B.1.617.2+AY.*)	G	AY.119.2	2	G-AY.119.2	21J (Delta)
all	14570000	2021-12-01	VOC Delta GK (B.1.617.2+AY.*)	GK	AY.119.2	40	GK-AY.119.2	21J (Delta)
all	1083201	2021-08-01	VOC Delta GK (B.1.617.2+AY.*)	GK	AY.120	1	GK-AY.120	21J (Delta)
all	1083201	2021-12-01	VOC Delta GK (B.1.617.2+AY.*)	GK	AY.120	1	GK-AY.120	21J (Delta)
all	1205380	2021-08-01	VOC Delta GK (B.1.617.2+AY.*)	GK	AY.120	5	GK-AY.120	21J (Delta)
all	1205380	2021-09-01	VOC Delta GK (B.1.617.2+AY.*)	GK	AY.120	3	GK-AY.120	21J (Delta)
all	1205380	2021-10-01	VOC Delta GK (B.1.617.2+AY.*)	GK	AY.120	3	GK-AY.120	21J (Delta)
all	1205380	2021-11-01	VOC Delta GK (B.1.617.2+AY.*)	GK	AY.120	2	GK-AY.120	21J (Delta)
all	1205380	2021-12-01	VOC Delta GK (B.1.617.2+AY.*)	GK	AY.120	1	GK-AY.120	21J (Delta)
all	2319719	2021-08-01	VOC Delta GK (B.1.617.2+AY.*)	GK	AY.120	2	GK-AY.120	21J (Delta)
all	8419316	2021-08-01	VOC Delta GK (B.1.617.2+AY.*)	GK	AY.120	3	GK-AY.120	21J (Delta)
all	8419316	2021-09-01	VOC Delta GK (B.1.617.2+AY.*)	GK	AY.120	8	GK-AY.120	21J (Delta)
all	8419316	2021-09-01	VOC Delta GK (B.1.617.2+AY.*)	O	AY.120	1	O-AY.120	21J (Delta)
all	8419316	2021-10-01	VOC Delta GK (B.1.617.2+AY.*)	GK	AY.120	10	GK-AY.120	21J (Delta)
all	8419316	2021-11-01	VOC Delta GK (B.1.617.2+AY.*)	GK	AY.120	16	GK-AY.120	21J (Delta)
all	8419316	2021-12-01	VOC Delta GK (B.1.617.2+AY.*)	G	AY.120	1	G-AY.120	21J (Delta)
all	8419316	2021-12-01	VOC Delta GK (B.1.617.2+AY.*)	GK	AY.120	5	GK-AY.120	21J (Delta)
all	421361	2021-11-01	VOC Delta GK (B.1.617.2+AY.*)	GK	AY.120	10	GK-AY.120	21J (Delta)
all	421361	2021-12-01	VOC Delta GK (B.1.617.2+AY.*)	GK	AY.120	2	GK-AY.120	21J (Delta)
all	636657	2021-08-01	VOC Delta GK (B.1.617.2+AY.*)	GK	AY.120	1	GK-AY.120	21J (Delta)
all	1382480	2021-08-01	VOC Delta GK (B.1.617.2+AY.*)	GK	AY.120	2	GK-AY.120	21J (Delta)
all	1382480	2021-09-01	VOC Delta GK (B.1.617.2+AY.*)	GK	AY.120	3	GK-AY.120	21J (Delta)
all	1382480	2021-10-01	VOC Delta GK (B.1.617.2+AY.*)	G	AY.120	1	G-AY.120	21J (Delta)
all	1382480	2021-10-01	VOC Delta GK (B.1.617.2+AY.*)	GK	AY.120	4	GK-AY.120	21J (Delta)
all	1382480	2021-11-01	VOC Delta GK (B.1.617.2+AY.*)	GK	AY.120	3	GK-AY.120	21J (Delta)
all	14570000	2021-08-01	VOC Delta GK (B.1.617.2+AY.*)	G	AY.120	1	G-AY.120	21J (Delta)
all	14570000	2021-08-01	VOC Delta GK (B.1.617.2+AY.*)	GK	AY.120	6	GK-AY.120	21J (Delta)
all	14570000	2021-09-01	VOC Delta GK (B.1.617.2+AY.*)	GK	AY.120	2	GK-AY.120	21J (Delta)
all	14570000	2021-10-01	VOC Delta GK (B.1.617.2+AY.*)	GK	AY.120	1	GK-AY.120	21J (Delta)
all	14570000	2021-11-01	VOC Delta GK (B.1.617.2+AY.*)	GK	AY.120	3	GK-AY.120	21J (Delta)
all	14570000	2021-12-01	VOC Delta GK (B.1.617.2+AY.*)	GK	AY.120	7	GK-AY.120	21J (Delta)
all	1083201	2021-10-01	VOC Delta GK (B.1.617.2+AY.*)	GK	AY.120.1	1	GK-AY.120.1	NA
all	1205380	2021-08-01	VOC Delta GK (B.1.617.2+AY.*)	G	AY.120.1	1	G-AY.120.1	NA
all	1205380	2021-08-01	VOC Delta GK (B.1.617.2+AY.*)	GK	AY.120.1	2	GK-AY.120.1	NA
all	2840341	2021-07-01	VOC Delta GK (B.1.617.2+AY.*)	GK	AY.120.1	1	GK-AY.120.1	NA
all	2840341	2021-08-01	VOC Delta GK (B.1.617.2+AY.*)	GK	AY.120.1	1	GK-AY.120.1	NA
all	2840341	2021-09-01	VOC Delta GK (B.1.617.2+AY.*)	GK	AY.120.1	1	GK-AY.120.1	NA
all	2319719	2021-09-01	VOC Delta GK (B.1.617.2+AY.*)	GK	AY.120.1	1	GK-AY.120.1	NA
all	2319719	2021-10-01	VOC Delta GK (B.1.617.2+AY.*)	GK	AY.120.1	1	GK-AY.120.1	NA
all	8419316	2021-08-01	VOC Delta GK (B.1.617.2+AY.*)	GK	AY.120.1	17	GK-AY.120.1	NA
all	8419316	2021-09-01	VOC Delta GK (B.1.617.2+AY.*)	G	AY.120.1	1	G-AY.120.1	NA
all	8419316	2021-09-01	VOC Delta GK (B.1.617.2+AY.*)	GK	AY.120.1	33	GK-AY.120.1	NA
all	8419316	2021-10-01	VOC Delta GK (B.1.617.2+AY.*)	GK	AY.120.1	19	GK-AY.120.1	NA
all	8419316	2021-11-01	VOC Delta GK (B.1.617.2+AY.*)	G	AY.120.1	1	G-AY.120.1	NA
all	8419316	2021-11-01	VOC Delta GK (B.1.617.2+AY.*)	GK	AY.120.1	3	GK-AY.120.1	NA
all	8419316	2021-12-01	VOC Delta GK (B.1.617.2+AY.*)	G	AY.120.1	1	G-AY.120.1	NA
all	8419316	2021-12-01	VOC Delta GK (B.1.617.2+AY.*)	GK	AY.120.1	7	GK-AY.120.1	NA
all	8419316	2021-10-01	VOC Delta GK (B.1.617.2+AY.*)	GK	AY.120.2	1	GK-AY.120.2	21J (Delta)
all	8419316	2021-12-01	VOC Delta GK (B.1.617.2+AY.*)	GK	AY.120.2	6	GK-AY.120.2	21J (Delta)
all	1382480	2021-08-01	VOC Delta GK (B.1.617.2+AY.*)	GK	AY.120.2	9	GK-AY.120.2	21J (Delta)
all	1382480	2021-09-01	VOC Delta GK (B.1.617.2+AY.*)	GK	AY.120.2	5	GK-AY.120.2	21J (Delta)
all	8419316	2021-08-01	VOC Delta GK (B.1.617.2+AY.*)	GK	AY.120.2.1	7	GK-AY.120.2.1	NA
all	8419316	2021-09-01	VOC Delta GK (B.1.617.2+AY.*)	GK	AY.120.2.1	1	GK-AY.120.2.1	NA
all	1083201	2021-11-01	VOC Delta GK (B.1.617.2+AY.*)	GK	AY.121	1	GK-AY.121	21J (Delta)
all	1083201	2021-12-01	VOC Delta GK (B.1.617.2+AY.*)	GK	AY.121	1	GK-AY.121	21J (Delta)
all	2840341	2021-10-01	VOC Delta GK (B.1.617.2+AY.*)	GK	AY.121	1	GK-AY.121	21J (Delta)
all	2840341	2021-11-01	VOC Delta GK (B.1.617.2+AY.*)	GK	AY.121	2	GK-AY.121	21J (Delta)
all	2319719	2021-08-01	VOC Delta GK (B.1.617.2+AY.*)	GK	AY.121	1	GK-AY.121	21J (Delta)
all	2319719	2021-09-01	VOC Delta GK (B.1.617.2+AY.*)	GK	AY.121	1	GK-AY.121	21J (Delta)
all	2319719	2021-10-01	VOC Delta GK (B.1.617.2+AY.*)	GK	AY.121	1	GK-AY.121	21J (Delta)
all	2319719	2021-11-01	VOC Delta GK (B.1.617.2+AY.*)	GK	AY.121	2	GK-AY.121	21J (Delta)
all	8419316	2021-05-01	VOC Delta GK (B.1.617.2+AY.*)	G	AY.121	1	G-AY.121	21J (Delta)
all	8419316	2021-07-01	VOC Delta GK (B.1.617.2+AY.*)	GK	AY.121	1	GK-AY.121	21J (Delta)
all	8419316	2021-08-01	VOC Delta GK (B.1.617.2+AY.*)	G	AY.121	1	G-AY.121	21J (Delta)
all	8419316	2021-08-01	VOC Delta GK (B.1.617.2+AY.*)	GK	AY.121	33	GK-AY.121	21J (Delta)
all	8419316	2021-09-01	VOC Delta GK (B.1.617.2+AY.*)	GK	AY.121	29	GK-AY.121	21J (Delta)
all	8419316	2021-10-01	VOC Delta GK (B.1.617.2+AY.*)	G	AY.121	7	G-AY.121	21J (Delta)
all	8419316	2021-10-01	VOC Delta GK (B.1.617.2+AY.*)	GK	AY.121	146	GK-AY.121	21J (Delta)
all	8419316	2021-10-01	VOC Delta GK (B.1.617.2+AY.*)	O	AY.121	1	O-AY.121	21J (Delta)
all	8419316	2021-11-01	VOC Delta GK (B.1.617.2+AY.*)	G	AY.121	5	G-AY.121	21J (Delta)
all	8419316	2021-11-01	VOC Delta GK (B.1.617.2+AY.*)	GK	AY.121	166	GK-AY.121	21J (Delta)
all	8419316	2021-12-01	VOC Delta GK (B.1.617.2+AY.*)	G	AY.121	5	G-AY.121	21J (Delta)
all	8419316	2021-12-01	VOC Delta GK (B.1.617.2+AY.*)	GK	AY.121	155	GK-AY.121	21J (Delta)
all	1382480	2021-08-01	VOC Delta GK (B.1.617.2+AY.*)	GK	AY.121	3	GK-AY.121	21J (Delta)
all	1382480	2021-10-01	VOC Delta GK (B.1.617.2+AY.*)	GK	AY.121	3	GK-AY.121	21J (Delta)
all	1382480	2021-11-01	VOC Delta GK (B.1.617.2+AY.*)	GK	AY.121	1	GK-AY.121	21J (Delta)
all	1382480	2021-12-01	VOC Delta GK (B.1.617.2+AY.*)	GK	AY.121	2	GK-AY.121	21J (Delta)
all	14570000	2021-08-01	VOC Delta GK (B.1.617.2+AY.*)	GK	AY.121	21	GK-AY.121	21J (Delta)
all	14570000	2021-09-01	VOC Delta GK (B.1.617.2+AY.*)	GK	AY.121	2	GK-AY.121	21J (Delta)
all	14570000	2021-10-01	VOC Delta GK (B.1.617.2+AY.*)	GK	AY.121	1	GK-AY.121	21J (Delta)
all	14570000	2021-11-01	VOC Delta GK (B.1.617.2+AY.*)	GK	AY.121	2	GK-AY.121	21J (Delta)
all	14570000	2021-12-01	VOC Delta GK (B.1.617.2+AY.*)	GK	AY.121	9	GK-AY.121	21J (Delta)
all	8419316	2021-11-01	VOC Delta GK (B.1.617.2+AY.*)	GK	AY.121.1	2	GK-AY.121.1	NA
all	14570000	2021-12-01	VOC Delta GK (B.1.617.2+AY.*)	GK	AY.121.1	1	GK-AY.121.1	NA
all	1083201	2021-07-01	VOC Delta GK (B.1.617.2+AY.*)	GK	AY.122	2	GK-AY.122	21J (Delta)
all	1083201	2021-08-01	VOC Delta GK (B.1.617.2+AY.*)	G	AY.122	1	G-AY.122	21J (Delta)
all	1083201	2021-08-01	VOC Delta GK (B.1.617.2+AY.*)	GK	AY.122	9	GK-AY.122	21J (Delta)
all	1083201	2021-09-01	VOC Delta GK (B.1.617.2+AY.*)	GK	AY.122	6	GK-AY.122	21J (Delta)
all	1083201	2021-10-01	VOC Delta GK (B.1.617.2+AY.*)	GK	AY.122	1	GK-AY.122	21J (Delta)
all	1083201	2021-11-01	VOC Delta GK (B.1.617.2+AY.*)	GK	AY.122	2	GK-AY.122	21J (Delta)
all	777706	2021-07-01	VOC Delta GK (B.1.617.2+AY.*)	GK	AY.122	2	GK-AY.122	21J (Delta)
all	777706	2021-09-01	VOC Delta GK (B.1.617.2+AY.*)	GK	AY.122	3	GK-AY.122	21J (Delta)
all	777706	2021-10-01	VOC Delta GK (B.1.617.2+AY.*)	GK	AY.122	1	GK-AY.122	21J (Delta)
all	777706	2021-12-01	VOC Delta GK (B.1.617.2+AY.*)	GK	AY.122	1	GK-AY.122	21J (Delta)
all	1205380	2021-08-01	VOC Delta GK (B.1.617.2+AY.*)	G	AY.122	1	G-AY.122	21J (Delta)
all	1205380	2021-08-01	VOC Delta GK (B.1.617.2+AY.*)	GK	AY.122	16	GK-AY.122	21J (Delta)
all	1205380	2021-09-01	VOC Delta GK (B.1.617.2+AY.*)	G	AY.122	2	G-AY.122	21J (Delta)
all	1205380	2021-09-01	VOC Delta GK (B.1.617.2+AY.*)	GK	AY.122	21	GK-AY.122	21J (Delta)
all	1205380	2021-10-01	VOC Delta GK (B.1.617.2+AY.*)	GK	AY.122	6	GK-AY.122	21J (Delta)
all	1205380	2021-11-01	VOC Delta GK (B.1.617.2+AY.*)	GK	AY.122	1	GK-AY.122	21J (Delta)
all	1205380	2021-12-01	VOC Delta GK (B.1.617.2+AY.*)	G	AY.122	1	G-AY.122	21J (Delta)
all	1205380	2021-12-01	VOC Delta GK (B.1.617.2+AY.*)	GK	AY.122	2	GK-AY.122	21J (Delta)
all	2840341	2021-07-01	VOC Delta GK (B.1.617.2+AY.*)	GK	AY.122	10	GK-AY.122	21J (Delta)
all	2840341	2021-08-01	VOC Delta GK (B.1.617.2+AY.*)	GK	AY.122	2	GK-AY.122	21J (Delta)
all	2840341	2021-09-01	VOC Delta GK (B.1.617.2+AY.*)	GK	AY.122	2	GK-AY.122	21J (Delta)
all	2840341	2021-10-01	VOC Delta GK (B.1.617.2+AY.*)	GK	AY.122	3	GK-AY.122	21J (Delta)
all	2319719	2021-05-01	VOC Delta GK (B.1.617.2+AY.*)	GK	AY.122	3	GK-AY.122	21J (Delta)
all	2319719	2021-07-01	VOC Delta GK (B.1.617.2+AY.*)	G	AY.122	1	G-AY.122	21J (Delta)
all	2319719	2021-07-01	VOC Delta GK (B.1.617.2+AY.*)	GK	AY.122	3	GK-AY.122	21J (Delta)
all	2319719	2021-08-01	VOC Delta GK (B.1.617.2+AY.*)	G	AY.122	4	G-AY.122	21J (Delta)
all	2319719	2021-08-01	VOC Delta GK (B.1.617.2+AY.*)	GK	AY.122	12	GK-AY.122	21J (Delta)
all	2319719	2021-09-01	VOC Delta GK (B.1.617.2+AY.*)	GK	AY.122	2	GK-AY.122	21J (Delta)
all	2319719	2021-10-01	VOC Delta GK (B.1.617.2+AY.*)	G	AY.122	1	G-AY.122	21J (Delta)
all	2319719	2021-10-01	VOC Delta GK (B.1.617.2+AY.*)	GK	AY.122	3	GK-AY.122	21J (Delta)
all	2319719	2021-11-01	VOC Delta GK (B.1.617.2+AY.*)	GK	AY.122	6	GK-AY.122	21J (Delta)
all	2319719	2021-12-01	VOC Delta GK (B.1.617.2+AY.*)	GK	AY.122	2	GK-AY.122	21J (Delta)
all	486158	2021-10-01	VOC Delta GK (B.1.617.2+AY.*)	GK	AY.122	1	GK-AY.122	21J (Delta)
all	486158	2021-12-01	VOC Delta GK (B.1.617.2+AY.*)	GK	AY.122	1	GK-AY.122	21J (Delta)
all	8419316	2021-04-01	VOC Delta GK (B.1.617.2+AY.*)	G	AY.122	1	G-AY.122	21J (Delta)
all	8419316	2021-05-01	VOC Delta GK (B.1.617.2+AY.*)	GK	AY.122	17	GK-AY.122	21J (Delta)
all	8419316	2021-06-01	VOC Delta GK (B.1.617.2+AY.*)	GK	AY.122	34	GK-AY.122	21J (Delta)
all	8419316	2021-07-01	VOC Delta GK (B.1.617.2+AY.*)	G	AY.122	3	G-AY.122	21J (Delta)
all	8419316	2021-07-01	VOC Delta GK (B.1.617.2+AY.*)	GK	AY.122	221	GK-AY.122	21J (Delta)
all	8419316	2021-08-01	VOC Delta GK (B.1.617.2+AY.*)	G	AY.122	22	G-AY.122	21J (Delta)
all	8419316	2021-08-01	VOC Delta GK (B.1.617.2+AY.*)	GK	AY.122	478	GK-AY.122	21J (Delta)
all	8419316	2021-08-01	VOC Delta GK (B.1.617.2+AY.*)	O	AY.122	5	O-AY.122	21J (Delta)
all	8419316	2021-09-01	VOC Delta GK (B.1.617.2+AY.*)	G	AY.122	20	G-AY.122	21J (Delta)
all	8419316	2021-09-01	VOC Delta GK (B.1.617.2+AY.*)	GK	AY.122	291	GK-AY.122	21J (Delta)
all	8419316	2021-09-01	VOC Delta GK (B.1.617.2+AY.*)	O	AY.122	3	O-AY.122	21J (Delta)
all	8419316	2021-10-01	VOC Delta GK (B.1.617.2+AY.*)	G	AY.122	11	G-AY.122	21J (Delta)
all	8419316	2021-10-01	VOC Delta GK (B.1.617.2+AY.*)	GK	AY.122	249	GK-AY.122	21J (Delta)
all	8419316	2021-10-01	VOC Delta GK (B.1.617.2+AY.*)	O	AY.122	2	O-AY.122	21J (Delta)
all	8419316	2021-11-01	VOC Delta GK (B.1.617.2+AY.*)	G	AY.122	12	G-AY.122	21J (Delta)
all	8419316	2021-11-01	VOC Delta GK (B.1.617.2+AY.*)	GK	AY.122	197	GK-AY.122	21J (Delta)
all	8419316	2021-11-01	VOC Delta GK (B.1.617.2+AY.*)	O	AY.122	4	O-AY.122	21J (Delta)
all	8419316	2021-12-01	VOC Delta GK (B.1.617.2+AY.*)	G	AY.122	8	G-AY.122	21J (Delta)
all	8419316	2021-12-01	VOC Delta GK (B.1.617.2+AY.*)	GK	AY.122	176	GK-AY.122	21J (Delta)
all	8419316	2021-12-01	VOC Delta GK (B.1.617.2+AY.*)	O	AY.122	2	O-AY.122	21J (Delta)
all	636657	2021-10-01	VOC Delta GK (B.1.617.2+AY.*)	G	AY.122	1	G-AY.122	21J (Delta)
all	636657	2021-11-01	VOC Delta GK (B.1.617.2+AY.*)	GK	AY.122	1	GK-AY.122	21J (Delta)
all	1382480	2021-08-01	VOC Delta GK (B.1.617.2+AY.*)	G	AY.122	1	G-AY.122	21J (Delta)
all	1382480	2021-08-01	VOC Delta GK (B.1.617.2+AY.*)	GK	AY.122	11	GK-AY.122	21J (Delta)
all	1382480	2021-09-01	VOC Delta GK (B.1.617.2+AY.*)	GK	AY.122	11	GK-AY.122	21J (Delta)
all	1382480	2021-10-01	VOC Delta GK (B.1.617.2+AY.*)	G	AY.122	2	G-AY.122	21J (Delta)
all	1382480	2021-10-01	VOC Delta GK (B.1.617.2+AY.*)	GK	AY.122	37	GK-AY.122	21J (Delta)
all	1382480	2021-11-01	VOC Delta GK (B.1.617.2+AY.*)	G	AY.122	1	G-AY.122	21J (Delta)
all	1382480	2021-11-01	VOC Delta GK (B.1.617.2+AY.*)	GK	AY.122	75	GK-AY.122	21J (Delta)
all	1382480	2021-12-01	VOC Delta GK (B.1.617.2+AY.*)	GK	AY.122	22	GK-AY.122	21J (Delta)
all	14570000	2021-05-01	VOC Delta GK (B.1.617.2+AY.*)	GK	AY.122	2	GK-AY.122	21J (Delta)
all	14570000	2021-06-01	VOC Delta GK (B.1.617.2+AY.*)	G	AY.122	2	G-AY.122	21J (Delta)
all	14570000	2021-06-01	VOC Delta GK (B.1.617.2+AY.*)	GK	AY.122	3	GK-AY.122	21J (Delta)
all	14570000	2021-07-01	VOC Delta GK (B.1.617.2+AY.*)	G	AY.122	4	G-AY.122	21J (Delta)
all	14570000	2021-07-01	VOC Delta GK (B.1.617.2+AY.*)	GK	AY.122	22	GK-AY.122	21J (Delta)
all	14570000	2021-08-01	VOC Delta GK (B.1.617.2+AY.*)	G	AY.122	1	G-AY.122	21J (Delta)
all	14570000	2021-08-01	VOC Delta GK (B.1.617.2+AY.*)	GK	AY.122	18	GK-AY.122	21J (Delta)
all	14570000	2021-09-01	VOC Delta GK (B.1.617.2+AY.*)	GK	AY.122	4	GK-AY.122	21J (Delta)
all	14570000	2021-10-01	VOC Delta GK (B.1.617.2+AY.*)	GK	AY.122	11	GK-AY.122	21J (Delta)
all	14570000	2021-11-01	VOC Delta GK (B.1.617.2+AY.*)	G	AY.122	1	G-AY.122	21J (Delta)
all	14570000	2021-11-01	VOC Delta GK (B.1.617.2+AY.*)	GK	AY.122	63	GK-AY.122	21J (Delta)
all	14570000	2021-12-01	VOC Delta GK (B.1.617.2+AY.*)	G	AY.122	11	G-AY.122	21J (Delta)
all	14570000	2021-12-01	VOC Delta GK (B.1.617.2+AY.*)	GK	AY.122	136	GK-AY.122	21J (Delta)
all	2840341	2021-11-01	VOC Delta GK (B.1.617.2+AY.*)	GK	AY.122.1	1	GK-AY.122.1	NA
all	2319719	2021-09-01	VOC Delta GK (B.1.617.2+AY.*)	GK	AY.122.1	2	GK-AY.122.1	NA
all	2319719	2021-10-01	VOC Delta GK (B.1.617.2+AY.*)	GK	AY.122.1	2	GK-AY.122.1	NA
all	2319719	2021-11-01	VOC Delta GK (B.1.617.2+AY.*)	GK	AY.122.1	1	GK-AY.122.1	NA
all	2319719	2021-12-01	VOC Delta GK (B.1.617.2+AY.*)	GK	AY.122.1	3	GK-AY.122.1	NA
all	8419316	2021-08-01	VOC Delta GK (B.1.617.2+AY.*)	G	AY.122.1	1	G-AY.122.1	NA
all	8419316	2021-08-01	VOC Delta GK (B.1.617.2+AY.*)	GK	AY.122.1	11	GK-AY.122.1	NA
all	8419316	2021-09-01	VOC Delta GK (B.1.617.2+AY.*)	G	AY.122.1	1	G-AY.122.1	NA
all	8419316	2021-09-01	VOC Delta GK (B.1.617.2+AY.*)	GK	AY.122.1	27	GK-AY.122.1	NA
all	8419316	2021-10-01	VOC Delta GK (B.1.617.2+AY.*)	GK	AY.122.1	48	GK-AY.122.1	NA
all	8419316	2021-11-01	VOC Delta GK (B.1.617.2+AY.*)	GK	AY.122.1	11	GK-AY.122.1	NA
all	8419316	2021-12-01	VOC Delta GK (B.1.617.2+AY.*)	GK	AY.122.1	6	GK-AY.122.1	NA
all	8419316	2021-10-01	VOC Delta GK (B.1.617.2+AY.*)	GK	AY.122.2	1	GK-AY.122.2	NA
all	2319719	2021-12-01	VOC Delta GK (B.1.617.2+AY.*)	GK	AY.122.4	2	GK-AY.122.4	21J (Delta)
all	8419316	2021-10-01	VOC Delta GK (B.1.617.2+AY.*)	GK	AY.122.4	4	GK-AY.122.4	21J (Delta)
all	8419316	2021-11-01	VOC Delta GK (B.1.617.2+AY.*)	GK	AY.122.4	9	GK-AY.122.4	21J (Delta)
all	8419316	2021-12-01	VOC Delta GK (B.1.617.2+AY.*)	G	AY.122.4	1	G-AY.122.4	21J (Delta)
all	8419316	2021-12-01	VOC Delta GK (B.1.617.2+AY.*)	GK	AY.122.4	16	GK-AY.122.4	21J (Delta)
all	421361	2021-12-01	VOC Delta GK (B.1.617.2+AY.*)	GK	AY.122.4	3	GK-AY.122.4	21J (Delta)
all	14570000	2021-11-01	VOC Delta GK (B.1.617.2+AY.*)	GK	AY.122.4	1	GK-AY.122.4	21J (Delta)
all	8419316	2021-11-01	VOC Delta GK (B.1.617.2+AY.*)	GK	AY.122.6	1	GK-AY.122.6	NA
all	8419316	2021-12-01	VOC Delta GK (B.1.617.2+AY.*)	GK	AY.122.6	3	GK-AY.122.6	NA
all	2319719	2021-08-01	VOC Delta GK (B.1.617.2+AY.*)	GK	AY.124	1	GK-AY.124	21J (Delta)
all	8419316	2021-10-01	VOC Delta GK (B.1.617.2+AY.*)	GK	AY.124	2	GK-AY.124	21J (Delta)
all	8419316	2021-12-01	VOC Delta GK (B.1.617.2+AY.*)	GK	AY.124	2	GK-AY.124	21J (Delta)
all	14570000	2021-11-01	VOC Delta GK (B.1.617.2+AY.*)	G	AY.124	1	G-AY.124	21J (Delta)
all	8419316	2021-10-01	VOC Delta GK (B.1.617.2+AY.*)	G	AY.124.1	1	G-AY.124.1	NA
all	8419316	2021-10-01	VOC Delta GK (B.1.617.2+AY.*)	GK	AY.124.1	1	GK-AY.124.1	NA
all	8419316	2021-11-01	VOC Delta GK (B.1.617.2+AY.*)	G	AY.124.1.1	1	G-AY.124.1.1	NA
all	2319719	2021-08-01	VOC Delta GK (B.1.617.2+AY.*)	GK	AY.125	2	GK-AY.125	NA
all	8419316	2021-08-01	VOC Delta GK (B.1.617.2+AY.*)	G	AY.125	1	G-AY.125	NA
all	8419316	2021-08-01	VOC Delta GK (B.1.617.2+AY.*)	GK	AY.125	8	GK-AY.125	NA
all	8419316	2021-09-01	VOC Delta GK (B.1.617.2+AY.*)	GK	AY.125	18	GK-AY.125	NA
all	8419316	2021-10-01	VOC Delta GK (B.1.617.2+AY.*)	GK	AY.125	9	GK-AY.125	NA
all	8419316	2021-11-01	VOC Delta GK (B.1.617.2+AY.*)	GK	AY.125	21	GK-AY.125	NA
all	8419316	2021-12-01	VOC Delta GK (B.1.617.2+AY.*)	G	AY.125	1	G-AY.125	NA
all	8419316	2021-12-01	VOC Delta GK (B.1.617.2+AY.*)	GK	AY.125	19	GK-AY.125	NA
all	14570000	2021-07-01	VOC Delta GK (B.1.617.2+AY.*)	G	AY.125	1	G-AY.125	NA
all	14570000	2021-08-01	VOC Delta GK (B.1.617.2+AY.*)	GK	AY.125	2	GK-AY.125	NA
all	14570000	2021-09-01	VOC Delta GK (B.1.617.2+AY.*)	GK	AY.125	4	GK-AY.125	NA
all	14570000	2021-10-01	VOC Delta GK (B.1.617.2+AY.*)	GK	AY.125	1	GK-AY.125	NA
all	14570000	2021-11-01	VOC Delta GK (B.1.617.2+AY.*)	GK	AY.125	1	GK-AY.125	NA
all	14570000	2021-12-01	VOC Delta GK (B.1.617.2+AY.*)	GK	AY.125	1	GK-AY.125	NA
all	1205380	2021-09-01	VOC Delta GK (B.1.617.2+AY.*)	GK	AY.126	1	GK-AY.126	21J (Delta)
all	2319719	2021-08-01	VOC Delta GK (B.1.617.2+AY.*)	GK	AY.126	1	GK-AY.126	21J (Delta)
all	2319719	2021-09-01	VOC Delta GK (B.1.617.2+AY.*)	GK	AY.126	1	GK-AY.126	21J (Delta)
all	8419316	2021-07-01	VOC Delta GK (B.1.617.2+AY.*)	GK	AY.126	5	GK-AY.126	21J (Delta)
all	8419316	2021-08-01	VOC Delta GK (B.1.617.2+AY.*)	GK	AY.126	3	GK-AY.126	21J (Delta)
all	8419316	2021-09-01	VOC Delta GK (B.1.617.2+AY.*)	G	AY.126	1	G-AY.126	21J (Delta)
all	8419316	2021-09-01	VOC Delta GK (B.1.617.2+AY.*)	GK	AY.126	6	GK-AY.126	21J (Delta)
all	8419316	2021-10-01	VOC Delta GK (B.1.617.2+AY.*)	GK	AY.126	7	GK-AY.126	21J (Delta)
all	8419316	2021-11-01	VOC Delta GK (B.1.617.2+AY.*)	GK	AY.126	19	GK-AY.126	21J (Delta)
all	8419316	2021-11-01	VOC Delta GK (B.1.617.2+AY.*)	O	AY.126	1	O-AY.126	21J (Delta)
all	8419316	2021-12-01	VOC Delta GK (B.1.617.2+AY.*)	G	AY.126	1	G-AY.126	21J (Delta)
all	8419316	2021-12-01	VOC Delta GK (B.1.617.2+AY.*)	GK	AY.126	28	GK-AY.126	21J (Delta)
all	1382480	2021-09-01	VOC Delta GK (B.1.617.2+AY.*)	GK	AY.126	1	GK-AY.126	21J (Delta)
all	1382480	2021-10-01	VOC Delta GK (B.1.617.2+AY.*)	GK	AY.126	1	GK-AY.126	21J (Delta)
all	14570000	2021-08-01	VOC Delta GK (B.1.617.2+AY.*)	GK	AY.126	12	GK-AY.126	21J (Delta)
all	14570000	2021-09-01	VOC Delta GK (B.1.617.2+AY.*)	GK	AY.126	2	GK-AY.126	21J (Delta)
all	14570000	2021-10-01	VOC Delta GK (B.1.617.2+AY.*)	GK	AY.126	1	GK-AY.126	21J (Delta)
all	14570000	2021-11-01	VOC Delta GK (B.1.617.2+AY.*)	GK	AY.126	1	GK-AY.126	21J (Delta)
all	14570000	2021-12-01	VOC Delta GK (B.1.617.2+AY.*)	G	AY.126	1	G-AY.126	21J (Delta)
all	14570000	2021-12-01	VOC Delta GK (B.1.617.2+AY.*)	GK	AY.126	7	GK-AY.126	21J (Delta)
all	1083201	2021-09-01	VOC Delta GK (B.1.617.2+AY.*)	GK	AY.127	1	GK-AY.127	21J (Delta)
all	777706	2021-10-01	VOC Delta GK (B.1.617.2+AY.*)	GK	AY.127	1	GK-AY.127	21J (Delta)
all	777706	2021-12-01	VOC Delta GK (B.1.617.2+AY.*)	GK	AY.127	2	GK-AY.127	21J (Delta)
all	1205380	2021-09-01	VOC Delta GK (B.1.617.2+AY.*)	G	AY.127	1	G-AY.127	21J (Delta)
all	2840341	2021-10-01	VOC Delta GK (B.1.617.2+AY.*)	G	AY.127	2	G-AY.127	21J (Delta)
all	2840341	2021-11-01	VOC Delta GK (B.1.617.2+AY.*)	GK	AY.127	1	GK-AY.127	21J (Delta)
all	2319719	2021-11-01	VOC Delta GK (B.1.617.2+AY.*)	GK	AY.127	2	GK-AY.127	21J (Delta)
all	8419316	2021-07-01	VOC Delta GK (B.1.617.2+AY.*)	G	AY.127	1	G-AY.127	21J (Delta)
all	8419316	2021-08-01	VOC Delta GK (B.1.617.2+AY.*)	G	AY.127	1	G-AY.127	21J (Delta)
all	8419316	2021-08-01	VOC Delta GK (B.1.617.2+AY.*)	GK	AY.127	5	GK-AY.127	21J (Delta)
all	8419316	2021-08-01	VOC Delta GK (B.1.617.2+AY.*)	O	AY.127	1	O-AY.127	21J (Delta)
all	8419316	2021-09-01	VOC Delta GK (B.1.617.2+AY.*)	G	AY.127	1	G-AY.127	21J (Delta)
all	8419316	2021-09-01	VOC Delta GK (B.1.617.2+AY.*)	GK	AY.127	29	GK-AY.127	21J (Delta)
all	8419316	2021-10-01	VOC Delta GK (B.1.617.2+AY.*)	GK	AY.127	59	GK-AY.127	21J (Delta)
all	8419316	2021-11-01	VOC Delta GK (B.1.617.2+AY.*)	G	AY.127	2	G-AY.127	21J (Delta)
all	8419316	2021-11-01	VOC Delta GK (B.1.617.2+AY.*)	GK	AY.127	60	GK-AY.127	21J (Delta)
all	8419316	2021-11-01	VOC Delta GK (B.1.617.2+AY.*)	O	AY.127	1	O-AY.127	21J (Delta)
all	8419316	2021-12-01	VOC Delta GK (B.1.617.2+AY.*)	G	AY.127	2	G-AY.127	21J (Delta)
all	8419316	2021-12-01	VOC Delta GK (B.1.617.2+AY.*)	GK	AY.127	66	GK-AY.127	21J (Delta)
all	1382480	2021-08-01	VOC Delta GK (B.1.617.2+AY.*)	GK	AY.127	1	GK-AY.127	21J (Delta)
all	1382480	2021-10-01	VOC Delta GK (B.1.617.2+AY.*)	GK	AY.127	1	GK-AY.127	21J (Delta)
all	1382480	2021-11-01	VOC Delta GK (B.1.617.2+AY.*)	GK	AY.127	2	GK-AY.127	21J (Delta)
all	1382480	2021-12-01	VOC Delta GK (B.1.617.2+AY.*)	GK	AY.127	2	GK-AY.127	21J (Delta)
all	14570000	2021-07-01	VOC Delta GK (B.1.617.2+AY.*)	G	AY.127	3	G-AY.127	21J (Delta)
all	14570000	2021-07-01	VOC Delta GK (B.1.617.2+AY.*)	GK	AY.127	6	GK-AY.127	21J (Delta)
all	14570000	2021-08-01	VOC Delta GK (B.1.617.2+AY.*)	GK	AY.127	3	GK-AY.127	21J (Delta)
all	14570000	2021-09-01	VOC Delta GK (B.1.617.2+AY.*)	G	AY.127	1	G-AY.127	21J (Delta)
all	14570000	2021-09-01	VOC Delta GK (B.1.617.2+AY.*)	GK	AY.127	6	GK-AY.127	21J (Delta)
all	14570000	2021-10-01	VOC Delta GK (B.1.617.2+AY.*)	GK	AY.127	2	GK-AY.127	21J (Delta)
all	14570000	2021-11-01	VOC Delta GK (B.1.617.2+AY.*)	GK	AY.127	19	GK-AY.127	21J (Delta)
all	14570000	2021-12-01	VOC Delta GK (B.1.617.2+AY.*)	G	AY.127	1	G-AY.127	21J (Delta)
all	14570000	2021-12-01	VOC Delta GK (B.1.617.2+AY.*)	GK	AY.127	41	GK-AY.127	21J (Delta)
all	8419316	2021-09-01	VOC Delta GK (B.1.617.2+AY.*)	GK	AY.128	1	GK-AY.128	NA
all	14570000	2021-11-01	VOC Delta GK (B.1.617.2+AY.*)	GK	AY.128	4	GK-AY.128	NA
all	1083201	2021-11-01	VOC Delta GK (B.1.617.2+AY.*)	GK	AY.129	2	GK-AY.129	NA
all	1083201	2021-12-01	VOC Delta GK (B.1.617.2+AY.*)	GK	AY.129	7	GK-AY.129	NA
all	1205380	2021-11-01	VOC Delta GK (B.1.617.2+AY.*)	GK	AY.129	1	GK-AY.129	NA
all	2319719	2021-08-01	VOC Delta GK (B.1.617.2+AY.*)	GK	AY.129	2	GK-AY.129	NA
all	2319719	2021-09-01	VOC Delta GK (B.1.617.2+AY.*)	GK	AY.129	2	GK-AY.129	NA
all	486158	2021-09-01	VOC Delta GK (B.1.617.2+AY.*)	G	AY.129	1	G-AY.129	NA
all	486158	2021-12-01	VOC Delta GK (B.1.617.2+AY.*)	GK	AY.129	1	GK-AY.129	NA
all	8419316	2021-08-01	VOC Delta GK (B.1.617.2+AY.*)	GK	AY.129	3	GK-AY.129	NA
all	8419316	2021-09-01	VOC Delta GK (B.1.617.2+AY.*)	GK	AY.129	7	GK-AY.129	NA
all	8419316	2021-10-01	VOC Delta GK (B.1.617.2+AY.*)	GK	AY.129	7	GK-AY.129	NA
all	8419316	2021-11-01	VOC Delta GK (B.1.617.2+AY.*)	GK	AY.129	23	GK-AY.129	NA
all	8419316	2021-11-01	VOC Delta GK (B.1.617.2+AY.*)	O	AY.129	1	O-AY.129	NA
all	8419316	2021-12-01	VOC Delta GK (B.1.617.2+AY.*)	GK	AY.129	14	GK-AY.129	NA
all	14570000	2021-08-01	VOC Delta GK (B.1.617.2+AY.*)	GK	AY.129	2	GK-AY.129	NA
all	14570000	2021-09-01	VOC Delta GK (B.1.617.2+AY.*)	GK	AY.129	1	GK-AY.129	NA
all	777706	2021-10-01	VOC Delta GK (B.1.617.2+AY.*)	G	AY.13	1	G-AY.13	21A (Delta)
all	777706	2021-10-01	VOC Delta GK (B.1.617.2+AY.*)	GK	AY.13	1	GK-AY.13	21A (Delta)
all	777706	2021-11-01	VOC Delta GK (B.1.617.2+AY.*)	GK	AY.13	1	GK-AY.13	21A (Delta)
all	1205380	2021-07-01	VOC Delta GK (B.1.617.2+AY.*)	GK	AY.13	1	GK-AY.13	21A (Delta)
all	1205380	2021-08-01	VOC Delta GK (B.1.617.2+AY.*)	GK	AY.13	3	GK-AY.13	21A (Delta)
all	1205380	2021-10-01	VOC Delta GK (B.1.617.2+AY.*)	GK	AY.13	5	GK-AY.13	21A (Delta)
all	1205380	2021-11-01	VOC Delta GK (B.1.617.2+AY.*)	GK	AY.13	1	GK-AY.13	21A (Delta)
all	2319719	2021-06-01	VOC Delta GK (B.1.617.2+AY.*)	G	AY.13	1	G-AY.13	21A (Delta)
all	2319719	2021-07-01	VOC Delta GK (B.1.617.2+AY.*)	GK	AY.13	2	GK-AY.13	21A (Delta)
all	2319719	2021-09-01	VOC Delta GK (B.1.617.2+AY.*)	GK	AY.13	1	GK-AY.13	21A (Delta)
all	2319719	2021-10-01	VOC Delta GK (B.1.617.2+AY.*)	GK	AY.13	2	GK-AY.13	21A (Delta)
all	486158	2021-12-01	VOC Delta GK (B.1.617.2+AY.*)	GK	AY.13	1	GK-AY.13	21A (Delta)
all	8419316	2021-05-01	VOC Delta GK (B.1.617.2+AY.*)	GK	AY.13	1	GK-AY.13	21A (Delta)
all	8419316	2021-07-01	VOC Delta GK (B.1.617.2+AY.*)	GK	AY.13	12	GK-AY.13	21A (Delta)
all	8419316	2021-08-01	VOC Delta GK (B.1.617.2+AY.*)	G	AY.13	1	G-AY.13	21A (Delta)
all	8419316	2021-08-01	VOC Delta GK (B.1.617.2+AY.*)	GK	AY.13	8	GK-AY.13	21A (Delta)
all	8419316	2021-08-01	VOC Delta GK (B.1.617.2+AY.*)	O	AY.13	1	O-AY.13	21A (Delta)
all	8419316	2021-09-01	VOC Delta GK (B.1.617.2+AY.*)	GK	AY.13	20	GK-AY.13	21A (Delta)
all	8419316	2021-09-01	VOC Delta GK (B.1.617.2+AY.*)	O	AY.13	1	O-AY.13	21A (Delta)
all	8419316	2021-10-01	VOC Delta GK (B.1.617.2+AY.*)	G	AY.13	1	G-AY.13	21A (Delta)
all	8419316	2021-10-01	VOC Delta GK (B.1.617.2+AY.*)	GK	AY.13	31	GK-AY.13	21A (Delta)
all	8419316	2021-11-01	VOC Delta GK (B.1.617.2+AY.*)	GK	AY.13	18	GK-AY.13	21A (Delta)
all	8419316	2021-12-01	VOC Delta GK (B.1.617.2+AY.*)	GK	AY.13	5	GK-AY.13	21A (Delta)
all	1382480	2021-08-01	VOC Delta GK (B.1.617.2+AY.*)	GK	AY.13	1	GK-AY.13	21A (Delta)
all	1382480	2021-09-01	VOC Delta GK (B.1.617.2+AY.*)	GK	AY.13	4	GK-AY.13	21A (Delta)
all	1382480	2021-10-01	VOC Delta GK (B.1.617.2+AY.*)	GK	AY.13	9	GK-AY.13	21A (Delta)
all	1382480	2021-11-01	VOC Delta GK (B.1.617.2+AY.*)	GK	AY.13	25	GK-AY.13	21A (Delta)
all	1382480	2021-12-01	VOC Delta GK (B.1.617.2+AY.*)	GK	AY.13	4	GK-AY.13	21A (Delta)
all	14570000	2021-07-01	VOC Delta GK (B.1.617.2+AY.*)	GK	AY.13	1	GK-AY.13	21A (Delta)
all	14570000	2021-08-01	VOC Delta GK (B.1.617.2+AY.*)	GK	AY.13	26	GK-AY.13	21A (Delta)
all	14570000	2021-09-01	VOC Delta GK (B.1.617.2+AY.*)	GK	AY.13	4	GK-AY.13	21A (Delta)
all	14570000	2021-10-01	VOC Delta GK (B.1.617.2+AY.*)	GK	AY.13	3	GK-AY.13	21A (Delta)
all	8419316	2021-08-01	VOC Delta GK (B.1.617.2+AY.*)	GK	AY.131	1	GK-AY.131	21J (Delta)
all	8419316	2021-12-01	VOC Delta GK (B.1.617.2+AY.*)	GK	AY.132	1	GK-AY.132	NA
all	8419316	2021-09-01	VOC Delta GK (B.1.617.2+AY.*)	GK	AY.133	1	GK-AY.133	NA
all	8419316	2021-10-01	VOC Delta GK (B.1.617.2+AY.*)	GK	AY.133	2	GK-AY.133	NA
all	14570000	2021-12-01	VOC Delta GK (B.1.617.2+AY.*)	GK	AY.133	2	GK-AY.133	NA
all	8419316	2021-10-01	VOC Delta GK (B.1.617.2+AY.*)	GK	AY.134	2	GK-AY.134	NA
all	1083201	2021-07-01	VOC Delta GK (B.1.617.2+AY.*)	GK	AY.14	1	GK-AY.14	21A (Delta)
all	1083201	2021-08-01	VOC Delta GK (B.1.617.2+AY.*)	G	AY.14	2	G-AY.14	21A (Delta)
all	1083201	2021-08-01	VOC Delta GK (B.1.617.2+AY.*)	GK	AY.14	3	GK-AY.14	21A (Delta)
all	1083201	2021-09-01	VOC Delta GK (B.1.617.2+AY.*)	GK	AY.14	2	GK-AY.14	21A (Delta)
all	1083201	2021-10-01	VOC Delta GK (B.1.617.2+AY.*)	GK	AY.14	2	GK-AY.14	21A (Delta)
all	1083201	2021-11-01	VOC Delta GK (B.1.617.2+AY.*)	G	AY.14	1	G-AY.14	21A (Delta)
all	1083201	2021-11-01	VOC Delta GK (B.1.617.2+AY.*)	GK	AY.14	8	GK-AY.14	21A (Delta)
all	1083201	2021-12-01	VOC Delta GK (B.1.617.2+AY.*)	GK	AY.14	6	GK-AY.14	21A (Delta)
all	777706	2021-08-01	VOC Delta GK (B.1.617.2+AY.*)	GK	AY.14	2	GK-AY.14	21A (Delta)
all	1205380	2021-07-01	VOC Delta GK (B.1.617.2+AY.*)	GK	AY.14	1	GK-AY.14	21A (Delta)
all	1205380	2021-08-01	VOC Delta GK (B.1.617.2+AY.*)	GK	AY.14	8	GK-AY.14	21A (Delta)
all	1205380	2021-10-01	VOC Delta GK (B.1.617.2+AY.*)	GK	AY.14	2	GK-AY.14	21A (Delta)
all	2840341	2021-07-01	VOC Delta GK (B.1.617.2+AY.*)	GK	AY.14	6	GK-AY.14	21A (Delta)
all	2840341	2021-08-01	VOC Delta GK (B.1.617.2+AY.*)	GK	AY.14	3	GK-AY.14	21A (Delta)
all	2840341	2021-09-01	VOC Delta GK (B.1.617.2+AY.*)	GK	AY.14	1	GK-AY.14	21A (Delta)
all	2319719	2021-07-01	VOC Delta GK (B.1.617.2+AY.*)	G	AY.14	1	G-AY.14	21A (Delta)
all	2319719	2021-08-01	VOC Delta GK (B.1.617.2+AY.*)	GK	AY.14	4	GK-AY.14	21A (Delta)
all	2319719	2021-11-01	VOC Delta GK (B.1.617.2+AY.*)	GK	AY.14	1	GK-AY.14	21A (Delta)
all	8419316	2021-06-01	VOC Delta GK (B.1.617.2+AY.*)	GK	AY.14	15	GK-AY.14	21A (Delta)
all	8419316	2021-07-01	VOC Delta GK (B.1.617.2+AY.*)	G	AY.14	2	G-AY.14	21A (Delta)
all	8419316	2021-07-01	VOC Delta GK (B.1.617.2+AY.*)	GK	AY.14	185	GK-AY.14	21A (Delta)
all	8419316	2021-07-01	VOC Delta GK (B.1.617.2+AY.*)	O	AY.14	1	O-AY.14	21A (Delta)
all	8419316	2021-08-01	VOC Delta GK (B.1.617.2+AY.*)	G	AY.14	7	G-AY.14	21A (Delta)
all	8419316	2021-08-01	VOC Delta GK (B.1.617.2+AY.*)	GK	AY.14	313	GK-AY.14	21A (Delta)
all	8419316	2021-08-01	VOC Delta GK (B.1.617.2+AY.*)	O	AY.14	1	O-AY.14	21A (Delta)
all	8419316	2021-09-01	VOC Delta GK (B.1.617.2+AY.*)	GK	AY.14	76	GK-AY.14	21A (Delta)
all	8419316	2021-09-01	VOC Delta GK (B.1.617.2+AY.*)	O	AY.14	1	O-AY.14	21A (Delta)
all	8419316	2021-10-01	VOC Delta GK (B.1.617.2+AY.*)	G	AY.14	2	G-AY.14	21A (Delta)
all	8419316	2021-10-01	VOC Delta GK (B.1.617.2+AY.*)	GK	AY.14	47	GK-AY.14	21A (Delta)
all	8419316	2021-11-01	VOC Delta GK (B.1.617.2+AY.*)	GK	AY.14	43	GK-AY.14	21A (Delta)
all	8419316	2021-12-01	VOC Delta GK (B.1.617.2+AY.*)	G	AY.14	1	G-AY.14	21A (Delta)
all	8419316	2021-12-01	VOC Delta GK (B.1.617.2+AY.*)	GK	AY.14	21	GK-AY.14	21A (Delta)
all	421361	2021-12-01	VOC Delta GK (B.1.617.2+AY.*)	GK	AY.14	2	GK-AY.14	21A (Delta)
all	636657	2021-11-01	VOC Delta GK (B.1.617.2+AY.*)	GK	AY.14	1	GK-AY.14	21A (Delta)
all	1382480	2021-07-01	VOC Delta GK (B.1.617.2+AY.*)	GK	AY.14	2	GK-AY.14	21A (Delta)
all	1382480	2021-08-01	VOC Delta GK (B.1.617.2+AY.*)	GK	AY.14	9	GK-AY.14	21A (Delta)
all	1382480	2021-09-01	VOC Delta GK (B.1.617.2+AY.*)	GK	AY.14	6	GK-AY.14	21A (Delta)
all	1382480	2021-10-01	VOC Delta GK (B.1.617.2+AY.*)	G	AY.14	1	G-AY.14	21A (Delta)
all	1382480	2021-10-01	VOC Delta GK (B.1.617.2+AY.*)	GK	AY.14	2	GK-AY.14	21A (Delta)
all	1382480	2021-11-01	VOC Delta GK (B.1.617.2+AY.*)	GK	AY.14	2	GK-AY.14	21A (Delta)
all	14570000	2021-08-01	VOC Delta GK (B.1.617.2+AY.*)	GK	AY.14	2	GK-AY.14	21A (Delta)
all	14570000	2021-09-01	VOC Delta GK (B.1.617.2+AY.*)	GK	AY.14	5	GK-AY.14	21A (Delta)
all	14570000	2021-11-01	VOC Delta GK (B.1.617.2+AY.*)	GK	AY.14	3	GK-AY.14	21A (Delta)
all	8419316	2021-08-01	VOC Delta GK (B.1.617.2+AY.*)	GK	AY.15	1	GK-AY.15	NA
all	14570000	2021-05-01	VOC Delta GK (B.1.617.2+AY.*)	GK	AY.15	3	GK-AY.15	NA
all	14570000	2021-06-01	VOC Delta GK (B.1.617.2+AY.*)	GK	AY.15	5	GK-AY.15	NA
all	14570000	2021-08-01	VOC Delta GK (B.1.617.2+AY.*)	GK	AY.15	4	GK-AY.15	NA
all	1205380	2021-08-01	VOC Delta GK (B.1.617.2+AY.*)	GK	AY.16	1	GK-AY.16	21A (Delta)
all	2319719	2021-07-01	VOC Delta GK (B.1.617.2+AY.*)	G	AY.16	1	G-AY.16	21A (Delta)
all	8419316	2021-07-01	VOC Delta GK (B.1.617.2+AY.*)	GK	AY.16	1	GK-AY.16	21A (Delta)
all	8419316	2021-08-01	VOC Delta GK (B.1.617.2+AY.*)	G	AY.16	1	G-AY.16	21A (Delta)
all	8419316	2021-08-01	VOC Delta GK (B.1.617.2+AY.*)	GK	AY.16	3	GK-AY.16	21A (Delta)
all	8419316	2021-09-01	VOC Delta GK (B.1.617.2+AY.*)	GK	AY.16	4	GK-AY.16	21A (Delta)
all	8419316	2021-10-01	VOC Delta GK (B.1.617.2+AY.*)	GK	AY.16	1	GK-AY.16	21A (Delta)
all	8419316	2021-11-01	VOC Delta GK (B.1.617.2+AY.*)	GK	AY.16	1	GK-AY.16	21A (Delta)
all	8419316	2021-12-01	VOC Delta GK (B.1.617.2+AY.*)	GK	AY.16	1	GK-AY.16	21A (Delta)
all	1382480	2021-08-01	VOC Delta GK (B.1.617.2+AY.*)	GK	AY.16	1	GK-AY.16	21A (Delta)
all	14570000	2021-06-01	VOC Delta GK (B.1.617.2+AY.*)	G	AY.16	1	G-AY.16	21A (Delta)
all	14570000	2021-06-01	VOC Delta GK (B.1.617.2+AY.*)	GK	AY.16	6	GK-AY.16	21A (Delta)
all	14570000	2021-08-01	VOC Delta GK (B.1.617.2+AY.*)	GK	AY.16	5	GK-AY.16	21A (Delta)
all	14570000	2021-06-01	VOC Delta GK (B.1.617.2+AY.*)	GK	AY.18	1	GK-AY.18	NA
all	1083201	2021-08-01	VOC Delta GK (B.1.617.2+AY.*)	GK	AY.2	1	GK-AY.2	21I (Delta)
all	1083201	2021-08-01	VOC Delta GK (B.1.617.2+AY.*)	GV	AY.2	2	GV-AY.2	21I (Delta)
all	1083201	2021-10-01	VOC Delta GK (B.1.617.2+AY.*)	GK	AY.2	1	GK-AY.2	21I (Delta)
all	1083201	2021-11-01	VOC Delta GK (B.1.617.2+AY.*)	GK	AY.2	3	GK-AY.2	21I (Delta)
all	8419316	2021-06-01	VOC Delta GK (B.1.617.2+AY.*)	GK	AY.2	2	GK-AY.2	21I (Delta)
all	8419316	2021-07-01	VOC Delta GK (B.1.617.2+AY.*)	GK	AY.2	2	GK-AY.2	21I (Delta)
all	8419316	2021-07-01	VOC Delta GK (B.1.617.2+AY.*)	GV	AY.2	1	GV-AY.2	21I (Delta)
all	8419316	2021-08-01	VOC Delta GK (B.1.617.2+AY.*)	GK	AY.2	7	GK-AY.2	21I (Delta)
all	8419316	2021-08-01	VOC Delta GK (B.1.617.2+AY.*)	GV	AY.2	1	GV-AY.2	21I (Delta)
all	8419316	2021-09-01	VOC Delta GK (B.1.617.2+AY.*)	GK	AY.2	4	GK-AY.2	21I (Delta)
all	8419316	2021-10-01	VOC Delta GK (B.1.617.2+AY.*)	GK	AY.2	2	GK-AY.2	21I (Delta)
all	8419316	2021-11-01	VOC Delta GK (B.1.617.2+AY.*)	GK	AY.2	4	GK-AY.2	21I (Delta)
all	8419316	2021-12-01	VOC Delta GK (B.1.617.2+AY.*)	GK	AY.2	2	GK-AY.2	21I (Delta)
all	1382480	2021-07-01	VOC Delta GK (B.1.617.2+AY.*)	GK	AY.2	1	GK-AY.2	21I (Delta)
all	1382480	2021-08-01	VOC Delta GK (B.1.617.2+AY.*)	GK	AY.2	3	GK-AY.2	21I (Delta)
all	1382480	2021-09-01	VOC Delta GK (B.1.617.2+AY.*)	GK	AY.2	1	GK-AY.2	21I (Delta)
all	1083201	2021-08-01	VOC Delta GK (B.1.617.2+AY.*)	G	AY.20	2	G-AY.20	21J (Delta)
all	1083201	2021-08-01	VOC Delta GK (B.1.617.2+AY.*)	GK	AY.20	5	GK-AY.20	21J (Delta)
all	1083201	2021-09-01	VOC Delta GK (B.1.617.2+AY.*)	GK	AY.20	3	GK-AY.20	21J (Delta)
all	1083201	2021-10-01	VOC Delta GK (B.1.617.2+AY.*)	G	AY.20	4	G-AY.20	21J (Delta)
all	1083201	2021-10-01	VOC Delta GK (B.1.617.2+AY.*)	GK	AY.20	2	GK-AY.20	21J (Delta)
all	1083201	2021-11-01	VOC Delta GK (B.1.617.2+AY.*)	GK	AY.20	6	GK-AY.20	21J (Delta)
all	1083201	2021-12-01	VOC Delta GK (B.1.617.2+AY.*)	GK	AY.20	3	GK-AY.20	21J (Delta)
all	777706	2021-12-01	VOC Delta GK (B.1.617.2+AY.*)	GK	AY.20	2	GK-AY.20	21J (Delta)
all	1205380	2021-07-01	VOC Delta GK (B.1.617.2+AY.*)	GK	AY.20	2	GK-AY.20	21J (Delta)
all	1205380	2021-08-01	VOC Delta GK (B.1.617.2+AY.*)	GK	AY.20	3	GK-AY.20	21J (Delta)
all	1205380	2021-09-01	VOC Delta GK (B.1.617.2+AY.*)	GK	AY.20	9	GK-AY.20	21J (Delta)
all	1205380	2021-10-01	VOC Delta GK (B.1.617.2+AY.*)	GK	AY.20	5	GK-AY.20	21J (Delta)
all	1205380	2021-11-01	VOC Delta GK (B.1.617.2+AY.*)	GK	AY.20	7	GK-AY.20	21J (Delta)
all	2840341	2021-08-01	VOC Delta GK (B.1.617.2+AY.*)	GK	AY.20	2	GK-AY.20	21J (Delta)
all	2319719	2021-07-01	VOC Delta GK (B.1.617.2+AY.*)	G	AY.20	1	G-AY.20	21J (Delta)
all	2319719	2021-07-01	VOC Delta GK (B.1.617.2+AY.*)	GK	AY.20	1	GK-AY.20	21J (Delta)
all	2319719	2021-08-01	VOC Delta GK (B.1.617.2+AY.*)	G	AY.20	2	G-AY.20	21J (Delta)
all	2319719	2021-08-01	VOC Delta GK (B.1.617.2+AY.*)	GK	AY.20	5	GK-AY.20	21J (Delta)
all	2319719	2021-09-01	VOC Delta GK (B.1.617.2+AY.*)	G	AY.20	1	G-AY.20	21J (Delta)
all	2319719	2021-09-01	VOC Delta GK (B.1.617.2+AY.*)	GK	AY.20	3	GK-AY.20	21J (Delta)
all	2319719	2021-10-01	VOC Delta GK (B.1.617.2+AY.*)	G	AY.20	1	G-AY.20	21J (Delta)
all	2319719	2021-10-01	VOC Delta GK (B.1.617.2+AY.*)	GK	AY.20	4	GK-AY.20	21J (Delta)
all	2319719	2021-11-01	VOC Delta GK (B.1.617.2+AY.*)	GK	AY.20	2	GK-AY.20	21J (Delta)
all	2319719	2021-12-01	VOC Delta GK (B.1.617.2+AY.*)	GK	AY.20	5	GK-AY.20	21J (Delta)
all	486158	2021-10-01	VOC Delta GK (B.1.617.2+AY.*)	GK	AY.20	2	GK-AY.20	21J (Delta)
all	8419316	2021-06-01	VOC Delta GK (B.1.617.2+AY.*)	GK	AY.20	2	GK-AY.20	21J (Delta)
all	8419316	2021-07-01	VOC Delta GK (B.1.617.2+AY.*)	GK	AY.20	85	GK-AY.20	21J (Delta)
all	8419316	2021-08-01	VOC Delta GK (B.1.617.2+AY.*)	G	AY.20	5	G-AY.20	21J (Delta)
all	8419316	2021-08-01	VOC Delta GK (B.1.617.2+AY.*)	GK	AY.20	217	GK-AY.20	21J (Delta)
all	8419316	2021-08-01	VOC Delta GK (B.1.617.2+AY.*)	GR	AY.20	2	GR-AY.20	21J (Delta)
all	8419316	2021-08-01	VOC Delta GK (B.1.617.2+AY.*)	O	AY.20	2	O-AY.20	21J (Delta)
all	8419316	2021-09-01	VOC Delta GK (B.1.617.2+AY.*)	G	AY.20	5	G-AY.20	21J (Delta)
all	8419316	2021-09-01	VOC Delta GK (B.1.617.2+AY.*)	GK	AY.20	242	GK-AY.20	21J (Delta)
all	8419316	2021-10-01	VOC Delta GK (B.1.617.2+AY.*)	G	AY.20	4	G-AY.20	21J (Delta)
all	8419316	2021-10-01	VOC Delta GK (B.1.617.2+AY.*)	GK	AY.20	106	GK-AY.20	21J (Delta)
all	8419316	2021-11-01	VOC Delta GK (B.1.617.2+AY.*)	GK	AY.20	94	GK-AY.20	21J (Delta)
all	8419316	2021-11-01	VOC Delta GK (B.1.617.2+AY.*)	O	AY.20	1	O-AY.20	21J (Delta)
all	8419316	2021-12-01	VOC Delta GK (B.1.617.2+AY.*)	G	AY.20	1	G-AY.20	21J (Delta)
all	8419316	2021-12-01	VOC Delta GK (B.1.617.2+AY.*)	GK	AY.20	29	GK-AY.20	21J (Delta)
all	421361	2021-10-01	VOC Delta GK (B.1.617.2+AY.*)	G	AY.20	1	G-AY.20	21J (Delta)
all	421361	2021-11-01	VOC Delta GK (B.1.617.2+AY.*)	GK	AY.20	1	GK-AY.20	21J (Delta)
all	636657	2021-08-01	VOC Delta GK (B.1.617.2+AY.*)	G	AY.20	1	G-AY.20	21J (Delta)
all	636657	2021-08-01	VOC Delta GK (B.1.617.2+AY.*)	GK	AY.20	1	GK-AY.20	21J (Delta)
all	636657	2021-09-01	VOC Delta GK (B.1.617.2+AY.*)	GK	AY.20	2	GK-AY.20	21J (Delta)
all	1382480	2021-07-01	VOC Delta GK (B.1.617.2+AY.*)	GK	AY.20	1	GK-AY.20	21J (Delta)
all	1382480	2021-08-01	VOC Delta GK (B.1.617.2+AY.*)	GK	AY.20	7	GK-AY.20	21J (Delta)
all	1382480	2021-09-01	VOC Delta GK (B.1.617.2+AY.*)	GK	AY.20	9	GK-AY.20	21J (Delta)
all	1382480	2021-10-01	VOC Delta GK (B.1.617.2+AY.*)	GK	AY.20	14	GK-AY.20	21J (Delta)
all	1382480	2021-11-01	VOC Delta GK (B.1.617.2+AY.*)	GK	AY.20	7	GK-AY.20	21J (Delta)
all	1382480	2021-12-01	VOC Delta GK (B.1.617.2+AY.*)	GK	AY.20	1	GK-AY.20	21J (Delta)
all	14570000	2021-05-01	VOC Delta GK (B.1.617.2+AY.*)	GK	AY.20	1	GK-AY.20	21J (Delta)
all	14570000	2021-07-01	VOC Delta GK (B.1.617.2+AY.*)	G	AY.20	1	G-AY.20	21J (Delta)
all	14570000	2021-07-01	VOC Delta GK (B.1.617.2+AY.*)	GK	AY.20	4	GK-AY.20	21J (Delta)
all	14570000	2021-08-01	VOC Delta GK (B.1.617.2+AY.*)	GK	AY.20	8	GK-AY.20	21J (Delta)
all	14570000	2021-10-01	VOC Delta GK (B.1.617.2+AY.*)	GK	AY.20	3	GK-AY.20	21J (Delta)
all	14570000	2021-11-01	VOC Delta GK (B.1.617.2+AY.*)	GK	AY.20	5	GK-AY.20	21J (Delta)
all	14570000	2021-12-01	VOC Delta GK (B.1.617.2+AY.*)	GK	AY.20	24	GK-AY.20	21J (Delta)
all	2840341	2021-08-01	VOC Delta GK (B.1.617.2+AY.*)	GK	AY.23	1	GK-AY.23	NA
all	2840341	2021-09-01	VOC Delta GK (B.1.617.2+AY.*)	GK	AY.23	1	GK-AY.23	NA
all	8419316	2021-06-01	VOC Delta GK (B.1.617.2+AY.*)	G	AY.23	1	G-AY.23	NA
all	8419316	2021-06-01	VOC Delta GK (B.1.617.2+AY.*)	GK	AY.23	10	GK-AY.23	NA
all	8419316	2021-08-01	VOC Delta GK (B.1.617.2+AY.*)	GK	AY.23	1	GK-AY.23	NA
all	8419316	2021-10-01	VOC Delta GK (B.1.617.2+AY.*)	G	AY.23	2	G-AY.23	NA
all	8419316	2021-10-01	VOC Delta GK (B.1.617.2+AY.*)	GK	AY.23	1	GK-AY.23	NA
all	8419316	2021-11-01	VOC Delta GK (B.1.617.2+AY.*)	GK	AY.23	3	GK-AY.23	NA
all	8419316	2021-12-01	VOC Delta GK (B.1.617.2+AY.*)	GK	AY.23	1	GK-AY.23	NA
all	14570000	2021-07-01	VOC Delta GK (B.1.617.2+AY.*)	G	AY.23	1	G-AY.23	NA
all	14570000	2021-07-01	VOC Delta GK (B.1.617.2+AY.*)	GK	AY.23	1	GK-AY.23	NA
all	14570000	2021-08-01	VOC Delta GK (B.1.617.2+AY.*)	GK	AY.23	1	GK-AY.23	NA
all	777706	2021-09-01	VOC Delta GK (B.1.617.2+AY.*)	GK	AY.24	1	GK-AY.24	21I (Delta)
all	8419316	2021-07-01	VOC Delta GK (B.1.617.2+AY.*)	GK	AY.24	4	GK-AY.24	21I (Delta)
all	8419316	2021-08-01	VOC Delta GK (B.1.617.2+AY.*)	GK	AY.24	10	GK-AY.24	21I (Delta)
all	8419316	2021-08-01	VOC Delta GK (B.1.617.2+AY.*)	GV	AY.24	1	GV-AY.24	21I (Delta)
all	8419316	2021-09-01	VOC Delta GK (B.1.617.2+AY.*)	GK	AY.24	5	GK-AY.24	21I (Delta)
all	8419316	2021-09-01	VOC Delta GK (B.1.617.2+AY.*)	GV	AY.24	1	GV-AY.24	21I (Delta)
all	1382480	2021-09-01	VOC Delta GK (B.1.617.2+AY.*)	GK	AY.24	1	GK-AY.24	21I (Delta)
all	8419316	2021-11-01	VOC Delta GK (B.1.617.2+AY.*)	GK	AY.25.1.2	4	GK-AY.25.1.2	NA
all	8419316	2021-12-01	VOC Delta GK (B.1.617.2+AY.*)	GK	AY.25.1.2	2	GK-AY.25.1.2	NA
all	14570000	2021-11-01	VOC Delta GK (B.1.617.2+AY.*)	GK	AY.25.1.2	1	GK-AY.25.1.2	NA
all	14570000	2021-12-01	VOC Delta GK (B.1.617.2+AY.*)	GK	AY.25.1.2	6	GK-AY.25.1.2	NA
all	8419316	2021-08-01	VOC Delta GK (B.1.617.2+AY.*)	GK	AY.25.2	1	GK-AY.25.2	21J (Delta)
all	8419316	2021-11-01	VOC Delta GK (B.1.617.2+AY.*)	GK	AY.25.2	1	GK-AY.25.2	21J (Delta)
all	8419316	2021-12-01	VOC Delta GK (B.1.617.2+AY.*)	GK	AY.25.2	2	GK-AY.25.2	21J (Delta)
all	1083201	2021-04-01	VOC Delta GK (B.1.617.2+AY.*)	GK	AY.26	2	GK-AY.26	21I (Delta)
all	1083201	2021-04-01	VOC Delta GK (B.1.617.2+AY.*)	GK	AY.26	2	GK-AY.26	21A (Delta)
all	1083201	2021-07-01	VOC Delta GK (B.1.617.2+AY.*)	GK	AY.26	1	GK-AY.26	21I (Delta)
all	1083201	2021-07-01	VOC Delta GK (B.1.617.2+AY.*)	GK	AY.26	1	GK-AY.26	21A (Delta)
all	1083201	2021-08-01	VOC Delta GK (B.1.617.2+AY.*)	GK	AY.26	14	GK-AY.26	21I (Delta)
all	1083201	2021-08-01	VOC Delta GK (B.1.617.2+AY.*)	GK	AY.26	14	GK-AY.26	21A (Delta)
all	1083201	2021-08-01	VOC Delta GK (B.1.617.2+AY.*)	GV	AY.26	2	GV-AY.26	21I (Delta)
all	1083201	2021-08-01	VOC Delta GK (B.1.617.2+AY.*)	GV	AY.26	2	GV-AY.26	21A (Delta)
all	1083201	2021-09-01	VOC Delta GK (B.1.617.2+AY.*)	GK	AY.26	4	GK-AY.26	21I (Delta)
all	1083201	2021-09-01	VOC Delta GK (B.1.617.2+AY.*)	GK	AY.26	4	GK-AY.26	21A (Delta)
all	1083201	2021-09-01	VOC Delta GK (B.1.617.2+AY.*)	GV	AY.26	1	GV-AY.26	21I (Delta)
all	1083201	2021-09-01	VOC Delta GK (B.1.617.2+AY.*)	GV	AY.26	1	GV-AY.26	21A (Delta)
all	1083201	2021-10-01	VOC Delta GK (B.1.617.2+AY.*)	GK	AY.26	2	GK-AY.26	21I (Delta)
all	1083201	2021-10-01	VOC Delta GK (B.1.617.2+AY.*)	GK	AY.26	2	GK-AY.26	21A (Delta)
all	1083201	2021-10-01	VOC Delta GK (B.1.617.2+AY.*)	GV	AY.26	1	GV-AY.26	21I (Delta)
all	1083201	2021-10-01	VOC Delta GK (B.1.617.2+AY.*)	GV	AY.26	1	GV-AY.26	21A (Delta)
all	777706	2021-07-01	VOC Delta GK (B.1.617.2+AY.*)	GK	AY.26	1	GK-AY.26	21I (Delta)
all	777706	2021-07-01	VOC Delta GK (B.1.617.2+AY.*)	GK	AY.26	1	GK-AY.26	21A (Delta)
all	777706	2021-08-01	VOC Delta GK (B.1.617.2+AY.*)	GK	AY.26	4	GK-AY.26	21I (Delta)
all	777706	2021-08-01	VOC Delta GK (B.1.617.2+AY.*)	GK	AY.26	4	GK-AY.26	21A (Delta)
all	777706	2021-08-01	VOC Delta GK (B.1.617.2+AY.*)	GV	AY.26	2	GV-AY.26	21I (Delta)
all	777706	2021-08-01	VOC Delta GK (B.1.617.2+AY.*)	GV	AY.26	2	GV-AY.26	21A (Delta)
all	777706	2021-09-01	VOC Delta GK (B.1.617.2+AY.*)	GK	AY.26	3	GK-AY.26	21I (Delta)
all	777706	2021-09-01	VOC Delta GK (B.1.617.2+AY.*)	GK	AY.26	3	GK-AY.26	21A (Delta)
all	777706	2021-10-01	VOC Delta GK (B.1.617.2+AY.*)	GK	AY.26	3	GK-AY.26	21I (Delta)
all	777706	2021-10-01	VOC Delta GK (B.1.617.2+AY.*)	GK	AY.26	3	GK-AY.26	21A (Delta)
all	777706	2021-10-01	VOC Delta GK (B.1.617.2+AY.*)	GV	AY.26	1	GV-AY.26	21I (Delta)
all	777706	2021-10-01	VOC Delta GK (B.1.617.2+AY.*)	GV	AY.26	1	GV-AY.26	21A (Delta)
all	1205380	2021-06-01	VOC Delta GK (B.1.617.2+AY.*)	GK	AY.26	2	GK-AY.26	21I (Delta)
all	1205380	2021-06-01	VOC Delta GK (B.1.617.2+AY.*)	GK	AY.26	2	GK-AY.26	21A (Delta)
all	1205380	2021-07-01	VOC Delta GK (B.1.617.2+AY.*)	GK	AY.26	14	GK-AY.26	21I (Delta)
all	1205380	2021-07-01	VOC Delta GK (B.1.617.2+AY.*)	GK	AY.26	14	GK-AY.26	21A (Delta)
all	1205380	2021-07-01	VOC Delta GK (B.1.617.2+AY.*)	GV	AY.26	1	GV-AY.26	21I (Delta)
all	1205380	2021-07-01	VOC Delta GK (B.1.617.2+AY.*)	GV	AY.26	1	GV-AY.26	21A (Delta)
all	1205380	2021-08-01	VOC Delta GK (B.1.617.2+AY.*)	GK	AY.26	20	GK-AY.26	21I (Delta)
all	1205380	2021-08-01	VOC Delta GK (B.1.617.2+AY.*)	GK	AY.26	20	GK-AY.26	21A (Delta)
all	1205380	2021-08-01	VOC Delta GK (B.1.617.2+AY.*)	GV	AY.26	4	GV-AY.26	21I (Delta)
all	1205380	2021-08-01	VOC Delta GK (B.1.617.2+AY.*)	GV	AY.26	4	GV-AY.26	21A (Delta)
all	1205380	2021-09-01	VOC Delta GK (B.1.617.2+AY.*)	GK	AY.26	26	GK-AY.26	21I (Delta)
all	1205380	2021-09-01	VOC Delta GK (B.1.617.2+AY.*)	GK	AY.26	26	GK-AY.26	21A (Delta)
all	1205380	2021-09-01	VOC Delta GK (B.1.617.2+AY.*)	GV	AY.26	1	GV-AY.26	21I (Delta)
all	1205380	2021-09-01	VOC Delta GK (B.1.617.2+AY.*)	GV	AY.26	1	GV-AY.26	21A (Delta)
all	1205380	2021-10-01	VOC Delta GK (B.1.617.2+AY.*)	GK	AY.26	5	GK-AY.26	21I (Delta)
all	1205380	2021-10-01	VOC Delta GK (B.1.617.2+AY.*)	GK	AY.26	5	GK-AY.26	21A (Delta)
all	1205380	2021-11-01	VOC Delta GK (B.1.617.2+AY.*)	GK	AY.26	1	GK-AY.26	21I (Delta)
all	1205380	2021-11-01	VOC Delta GK (B.1.617.2+AY.*)	GK	AY.26	1	GK-AY.26	21A (Delta)
all	2840341	2021-07-01	VOC Delta GK (B.1.617.2+AY.*)	GK	AY.26	5	GK-AY.26	21I (Delta)
all	2840341	2021-07-01	VOC Delta GK (B.1.617.2+AY.*)	GK	AY.26	5	GK-AY.26	21A (Delta)
all	2840341	2021-08-01	VOC Delta GK (B.1.617.2+AY.*)	GK	AY.26	4	GK-AY.26	21I (Delta)
all	2840341	2021-08-01	VOC Delta GK (B.1.617.2+AY.*)	GK	AY.26	4	GK-AY.26	21A (Delta)
all	2840341	2021-09-01	VOC Delta GK (B.1.617.2+AY.*)	GK	AY.26	1	GK-AY.26	21I (Delta)
all	2840341	2021-09-01	VOC Delta GK (B.1.617.2+AY.*)	GK	AY.26	1	GK-AY.26	21A (Delta)
all	2319719	2021-07-01	VOC Delta GK (B.1.617.2+AY.*)	GK	AY.26	4	GK-AY.26	21I (Delta)
all	2319719	2021-07-01	VOC Delta GK (B.1.617.2+AY.*)	GK	AY.26	4	GK-AY.26	21A (Delta)
all	2319719	2021-07-01	VOC Delta GK (B.1.617.2+AY.*)	GV	AY.26	1	GV-AY.26	21I (Delta)
all	2319719	2021-07-01	VOC Delta GK (B.1.617.2+AY.*)	GV	AY.26	1	GV-AY.26	21A (Delta)
all	2319719	2021-08-01	VOC Delta GK (B.1.617.2+AY.*)	GK	AY.26	15	GK-AY.26	21I (Delta)
all	2319719	2021-08-01	VOC Delta GK (B.1.617.2+AY.*)	GK	AY.26	15	GK-AY.26	21A (Delta)
all	2319719	2021-08-01	VOC Delta GK (B.1.617.2+AY.*)	GV	AY.26	2	GV-AY.26	21I (Delta)
all	2319719	2021-08-01	VOC Delta GK (B.1.617.2+AY.*)	GV	AY.26	2	GV-AY.26	21A (Delta)
all	2319719	2021-08-01	VOC Delta GK (B.1.617.2+AY.*)	O	AY.26	1	O-AY.26	21I (Delta)
all	2319719	2021-08-01	VOC Delta GK (B.1.617.2+AY.*)	O	AY.26	1	O-AY.26	21A (Delta)
all	2319719	2021-09-01	VOC Delta GK (B.1.617.2+AY.*)	GK	AY.26	10	GK-AY.26	21I (Delta)
all	2319719	2021-09-01	VOC Delta GK (B.1.617.2+AY.*)	GK	AY.26	10	GK-AY.26	21A (Delta)
all	2319719	2021-10-01	VOC Delta GK (B.1.617.2+AY.*)	GK	AY.26	3	GK-AY.26	21I (Delta)
all	2319719	2021-10-01	VOC Delta GK (B.1.617.2+AY.*)	GK	AY.26	3	GK-AY.26	21A (Delta)
all	2319719	2021-11-01	VOC Delta GK (B.1.617.2+AY.*)	G	AY.26	1	G-AY.26	21I (Delta)
all	2319719	2021-11-01	VOC Delta GK (B.1.617.2+AY.*)	G	AY.26	1	G-AY.26	21A (Delta)
all	2319719	2021-11-01	VOC Delta GK (B.1.617.2+AY.*)	GK	AY.26	8	GK-AY.26	21I (Delta)
all	2319719	2021-11-01	VOC Delta GK (B.1.617.2+AY.*)	GK	AY.26	8	GK-AY.26	21A (Delta)
all	2319719	2021-12-01	VOC Delta GK (B.1.617.2+AY.*)	GK	AY.26	1	GK-AY.26	21I (Delta)
all	2319719	2021-12-01	VOC Delta GK (B.1.617.2+AY.*)	GK	AY.26	1	GK-AY.26	21A (Delta)
all	486158	2021-09-01	VOC Delta GK (B.1.617.2+AY.*)	GK	AY.26	1	GK-AY.26	21I (Delta)
all	486158	2021-09-01	VOC Delta GK (B.1.617.2+AY.*)	GK	AY.26	1	GK-AY.26	21A (Delta)
all	486158	2021-10-01	VOC Delta GK (B.1.617.2+AY.*)	GK	AY.26	2	GK-AY.26	21I (Delta)
all	486158	2021-10-01	VOC Delta GK (B.1.617.2+AY.*)	GK	AY.26	2	GK-AY.26	21A (Delta)
all	8419316	2021-04-01	VOC Delta GK (B.1.617.2+AY.*)	GK	AY.26	1	GK-AY.26	21I (Delta)
all	8419316	2021-04-01	VOC Delta GK (B.1.617.2+AY.*)	GK	AY.26	1	GK-AY.26	21A (Delta)
all	8419316	2021-05-01	VOC Delta GK (B.1.617.2+AY.*)	GK	AY.26	5	GK-AY.26	21I (Delta)
all	8419316	2021-05-01	VOC Delta GK (B.1.617.2+AY.*)	GK	AY.26	5	GK-AY.26	21A (Delta)
all	8419316	2021-06-01	VOC Delta GK (B.1.617.2+AY.*)	GK	AY.26	10	GK-AY.26	21I (Delta)
all	8419316	2021-06-01	VOC Delta GK (B.1.617.2+AY.*)	GK	AY.26	10	GK-AY.26	21A (Delta)
all	8419316	2021-07-01	VOC Delta GK (B.1.617.2+AY.*)	G	AY.26	1	G-AY.26	21I (Delta)
all	8419316	2021-07-01	VOC Delta GK (B.1.617.2+AY.*)	G	AY.26	1	G-AY.26	21A (Delta)
all	8419316	2021-07-01	VOC Delta GK (B.1.617.2+AY.*)	GK	AY.26	179	GK-AY.26	21I (Delta)
all	8419316	2021-07-01	VOC Delta GK (B.1.617.2+AY.*)	GK	AY.26	179	GK-AY.26	21A (Delta)
all	8419316	2021-07-01	VOC Delta GK (B.1.617.2+AY.*)	GV	AY.26	2	GV-AY.26	21I (Delta)
all	8419316	2021-07-01	VOC Delta GK (B.1.617.2+AY.*)	GV	AY.26	2	GV-AY.26	21A (Delta)
all	8419316	2021-08-01	VOC Delta GK (B.1.617.2+AY.*)	G	AY.26	3	G-AY.26	21I (Delta)
all	8419316	2021-08-01	VOC Delta GK (B.1.617.2+AY.*)	G	AY.26	3	G-AY.26	21A (Delta)
all	8419316	2021-08-01	VOC Delta GK (B.1.617.2+AY.*)	GK	AY.26	510	GK-AY.26	21I (Delta)
all	8419316	2021-08-01	VOC Delta GK (B.1.617.2+AY.*)	GK	AY.26	510	GK-AY.26	21A (Delta)
all	8419316	2021-08-01	VOC Delta GK (B.1.617.2+AY.*)	GR	AY.26	1	GR-AY.26	21I (Delta)
all	8419316	2021-08-01	VOC Delta GK (B.1.617.2+AY.*)	GR	AY.26	1	GR-AY.26	21A (Delta)
all	8419316	2021-08-01	VOC Delta GK (B.1.617.2+AY.*)	GV	AY.26	12	GV-AY.26	21I (Delta)
all	8419316	2021-08-01	VOC Delta GK (B.1.617.2+AY.*)	GV	AY.26	12	GV-AY.26	21A (Delta)
all	8419316	2021-08-01	VOC Delta GK (B.1.617.2+AY.*)	O	AY.26	6	O-AY.26	21I (Delta)
all	8419316	2021-08-01	VOC Delta GK (B.1.617.2+AY.*)	O	AY.26	6	O-AY.26	21A (Delta)
all	8419316	2021-09-01	VOC Delta GK (B.1.617.2+AY.*)	G	AY.26	2	G-AY.26	21I (Delta)
all	8419316	2021-09-01	VOC Delta GK (B.1.617.2+AY.*)	G	AY.26	2	G-AY.26	21A (Delta)
all	8419316	2021-09-01	VOC Delta GK (B.1.617.2+AY.*)	GK	AY.26	278	GK-AY.26	21I (Delta)
all	8419316	2021-09-01	VOC Delta GK (B.1.617.2+AY.*)	GK	AY.26	278	GK-AY.26	21A (Delta)
all	8419316	2021-09-01	VOC Delta GK (B.1.617.2+AY.*)	GV	AY.26	5	GV-AY.26	21I (Delta)
all	8419316	2021-09-01	VOC Delta GK (B.1.617.2+AY.*)	GV	AY.26	5	GV-AY.26	21A (Delta)
all	8419316	2021-09-01	VOC Delta GK (B.1.617.2+AY.*)	O	AY.26	1	O-AY.26	21I (Delta)
all	8419316	2021-09-01	VOC Delta GK (B.1.617.2+AY.*)	O	AY.26	1	O-AY.26	21A (Delta)
all	8419316	2021-10-01	VOC Delta GK (B.1.617.2+AY.*)	G	AY.26	2	G-AY.26	21I (Delta)
all	8419316	2021-10-01	VOC Delta GK (B.1.617.2+AY.*)	G	AY.26	2	G-AY.26	21A (Delta)
all	8419316	2021-10-01	VOC Delta GK (B.1.617.2+AY.*)	GK	AY.26	89	GK-AY.26	21I (Delta)
all	8419316	2021-10-01	VOC Delta GK (B.1.617.2+AY.*)	GK	AY.26	89	GK-AY.26	21A (Delta)
all	8419316	2021-10-01	VOC Delta GK (B.1.617.2+AY.*)	GV	AY.26	3	GV-AY.26	21I (Delta)
all	8419316	2021-10-01	VOC Delta GK (B.1.617.2+AY.*)	GV	AY.26	3	GV-AY.26	21A (Delta)
all	8419316	2021-11-01	VOC Delta GK (B.1.617.2+AY.*)	G	AY.26	1	G-AY.26	21I (Delta)
all	8419316	2021-11-01	VOC Delta GK (B.1.617.2+AY.*)	G	AY.26	1	G-AY.26	21A (Delta)
all	8419316	2021-11-01	VOC Delta GK (B.1.617.2+AY.*)	GK	AY.26	62	GK-AY.26	21I (Delta)
all	8419316	2021-11-01	VOC Delta GK (B.1.617.2+AY.*)	GK	AY.26	62	GK-AY.26	21A (Delta)
all	8419316	2021-11-01	VOC Delta GK (B.1.617.2+AY.*)	GV	AY.26	4	GV-AY.26	21I (Delta)
all	8419316	2021-11-01	VOC Delta GK (B.1.617.2+AY.*)	GV	AY.26	4	GV-AY.26	21A (Delta)
all	8419316	2021-11-01	VOC Delta GK (B.1.617.2+AY.*)	O	AY.26	2	O-AY.26	21I (Delta)
all	8419316	2021-11-01	VOC Delta GK (B.1.617.2+AY.*)	O	AY.26	2	O-AY.26	21A (Delta)
all	8419316	2021-12-01	VOC Delta GK (B.1.617.2+AY.*)	G	AY.26	1	G-AY.26	21I (Delta)
all	8419316	2021-12-01	VOC Delta GK (B.1.617.2+AY.*)	G	AY.26	1	G-AY.26	21A (Delta)
all	8419316	2021-12-01	VOC Delta GK (B.1.617.2+AY.*)	GK	AY.26	30	GK-AY.26	21I (Delta)
all	8419316	2021-12-01	VOC Delta GK (B.1.617.2+AY.*)	GK	AY.26	30	GK-AY.26	21A (Delta)
all	8419316	2021-12-01	VOC Delta GK (B.1.617.2+AY.*)	GV	AY.26	1	GV-AY.26	21I (Delta)
all	8419316	2021-12-01	VOC Delta GK (B.1.617.2+AY.*)	GV	AY.26	1	GV-AY.26	21A (Delta)
all	421361	2021-07-01	VOC Delta GK (B.1.617.2+AY.*)	GK	AY.26	2	GK-AY.26	21I (Delta)
all	421361	2021-07-01	VOC Delta GK (B.1.617.2+AY.*)	GK	AY.26	2	GK-AY.26	21A (Delta)
all	421361	2021-08-01	VOC Delta GK (B.1.617.2+AY.*)	GK	AY.26	3	GK-AY.26	21I (Delta)
all	421361	2021-08-01	VOC Delta GK (B.1.617.2+AY.*)	GK	AY.26	3	GK-AY.26	21A (Delta)
all	421361	2021-08-01	VOC Delta GK (B.1.617.2+AY.*)	GV	AY.26	1	GV-AY.26	21I (Delta)
all	421361	2021-08-01	VOC Delta GK (B.1.617.2+AY.*)	GV	AY.26	1	GV-AY.26	21A (Delta)
all	421361	2021-10-01	VOC Delta GK (B.1.617.2+AY.*)	GK	AY.26	1	GK-AY.26	21I (Delta)
all	421361	2021-10-01	VOC Delta GK (B.1.617.2+AY.*)	GK	AY.26	1	GK-AY.26	21A (Delta)
all	636657	2021-09-01	VOC Delta GK (B.1.617.2+AY.*)	GK	AY.26	1	GK-AY.26	21I (Delta)
all	636657	2021-09-01	VOC Delta GK (B.1.617.2+AY.*)	GK	AY.26	1	GK-AY.26	21A (Delta)
all	1382480	2021-07-01	VOC Delta GK (B.1.617.2+AY.*)	GK	AY.26	3	GK-AY.26	21I (Delta)
all	1382480	2021-07-01	VOC Delta GK (B.1.617.2+AY.*)	GK	AY.26	3	GK-AY.26	21A (Delta)
all	1382480	2021-08-01	VOC Delta GK (B.1.617.2+AY.*)	GK	AY.26	20	GK-AY.26	21I (Delta)
all	1382480	2021-08-01	VOC Delta GK (B.1.617.2+AY.*)	GK	AY.26	20	GK-AY.26	21A (Delta)
all	1382480	2021-08-01	VOC Delta GK (B.1.617.2+AY.*)	O	AY.26	1	O-AY.26	21I (Delta)
all	1382480	2021-08-01	VOC Delta GK (B.1.617.2+AY.*)	O	AY.26	1	O-AY.26	21A (Delta)
all	1382480	2021-09-01	VOC Delta GK (B.1.617.2+AY.*)	GK	AY.26	11	GK-AY.26	21I (Delta)
all	1382480	2021-09-01	VOC Delta GK (B.1.617.2+AY.*)	GK	AY.26	11	GK-AY.26	21A (Delta)
all	1382480	2021-10-01	VOC Delta GK (B.1.617.2+AY.*)	GK	AY.26	4	GK-AY.26	21I (Delta)
all	1382480	2021-10-01	VOC Delta GK (B.1.617.2+AY.*)	GK	AY.26	4	GK-AY.26	21A (Delta)
all	14570000	2021-07-01	VOC Delta GK (B.1.617.2+AY.*)	G	AY.26	1	G-AY.26	21I (Delta)
all	14570000	2021-07-01	VOC Delta GK (B.1.617.2+AY.*)	G	AY.26	1	G-AY.26	21A (Delta)
all	14570000	2021-07-01	VOC Delta GK (B.1.617.2+AY.*)	GK	AY.26	6	GK-AY.26	21I (Delta)
all	14570000	2021-07-01	VOC Delta GK (B.1.617.2+AY.*)	GK	AY.26	6	GK-AY.26	21A (Delta)
all	14570000	2021-07-01	VOC Delta GK (B.1.617.2+AY.*)	GV	AY.26	1	GV-AY.26	21I (Delta)
all	14570000	2021-07-01	VOC Delta GK (B.1.617.2+AY.*)	GV	AY.26	1	GV-AY.26	21A (Delta)
all	14570000	2021-08-01	VOC Delta GK (B.1.617.2+AY.*)	GK	AY.26	4	GK-AY.26	21I (Delta)
all	14570000	2021-08-01	VOC Delta GK (B.1.617.2+AY.*)	GK	AY.26	4	GK-AY.26	21A (Delta)
all	14570000	2021-09-01	VOC Delta GK (B.1.617.2+AY.*)	GK	AY.26	2	GK-AY.26	21I (Delta)
all	14570000	2021-09-01	VOC Delta GK (B.1.617.2+AY.*)	GK	AY.26	2	GK-AY.26	21A (Delta)
all	14570000	2021-11-01	VOC Delta GK (B.1.617.2+AY.*)	GK	AY.26	2	GK-AY.26	21I (Delta)
all	14570000	2021-11-01	VOC Delta GK (B.1.617.2+AY.*)	GK	AY.26	2	GK-AY.26	21A (Delta)
all	14570000	2021-12-01	VOC Delta GK (B.1.617.2+AY.*)	GK	AY.26	7	GK-AY.26	21I (Delta)
all	14570000	2021-12-01	VOC Delta GK (B.1.617.2+AY.*)	GK	AY.26	7	GK-AY.26	21A (Delta)
all	2319719	2021-12-01	VOC Delta GK (B.1.617.2+AY.*)	GK	AY.27	2	GK-AY.27	21I (Delta)
all	8419316	2021-08-01	VOC Delta GK (B.1.617.2+AY.*)	GK	AY.27	3	GK-AY.27	21I (Delta)
all	8419316	2021-09-01	VOC Delta GK (B.1.617.2+AY.*)	GK	AY.27	1	GK-AY.27	21I (Delta)
all	8419316	2021-10-01	VOC Delta GK (B.1.617.2+AY.*)	GK	AY.27	7	GK-AY.27	21I (Delta)
all	8419316	2021-11-01	VOC Delta GK (B.1.617.2+AY.*)	GK	AY.27	3	GK-AY.27	21I (Delta)
all	8419316	2021-12-01	VOC Delta GK (B.1.617.2+AY.*)	GK	AY.27	3	GK-AY.27	21I (Delta)
all	14570000	2021-07-01	VOC Delta GK (B.1.617.2+AY.*)	GK	AY.27	3	GK-AY.27	21I (Delta)
all	14570000	2021-08-01	VOC Delta GK (B.1.617.2+AY.*)	G	AY.27	4	G-AY.27	21I (Delta)
all	14570000	2021-08-01	VOC Delta GK (B.1.617.2+AY.*)	GK	AY.27	154	GK-AY.27	21I (Delta)
all	14570000	2021-08-01	VOC Delta GK (B.1.617.2+AY.*)	GV	AY.27	6	GV-AY.27	21I (Delta)
all	14570000	2021-09-01	VOC Delta GK (B.1.617.2+AY.*)	G	AY.27	2	G-AY.27	21I (Delta)
all	14570000	2021-09-01	VOC Delta GK (B.1.617.2+AY.*)	GK	AY.27	94	GK-AY.27	21I (Delta)
all	14570000	2021-09-01	VOC Delta GK (B.1.617.2+AY.*)	GV	AY.27	5	GV-AY.27	21I (Delta)
all	14570000	2021-10-01	VOC Delta GK (B.1.617.2+AY.*)	GK	AY.27	56	GK-AY.27	21I (Delta)
all	14570000	2021-10-01	VOC Delta GK (B.1.617.2+AY.*)	GV	AY.27	1	GV-AY.27	21I (Delta)
all	14570000	2021-11-01	VOC Delta GK (B.1.617.2+AY.*)	GK	AY.27	368	GK-AY.27	21I (Delta)
all	14570000	2021-11-01	VOC Delta GK (B.1.617.2+AY.*)	GV	AY.27	3	GV-AY.27	21I (Delta)
all	14570000	2021-12-01	VOC Delta GK (B.1.617.2+AY.*)	G	AY.27	11	G-AY.27	21I (Delta)
all	14570000	2021-12-01	VOC Delta GK (B.1.617.2+AY.*)	GK	AY.27	340	GK-AY.27	21I (Delta)
all	14570000	2021-12-01	VOC Delta GK (B.1.617.2+AY.*)	GV	AY.27	39	GV-AY.27	21I (Delta)
all	8419316	2021-11-01	VOC Delta GK (B.1.617.2+AY.*)	GK	AY.28	1	GK-AY.28	NA
all	14570000	2021-08-01	VOC Delta GK (B.1.617.2+AY.*)	GV	AY.28	1	GV-AY.28	NA
all	14570000	2021-11-01	VOC Delta GK (B.1.617.2+AY.*)	GK	AY.28	2	GK-AY.28	NA
all	8419316	2021-08-01	VOC Delta GK (B.1.617.2+AY.*)	GK	AY.29	1	GK-AY.29	21J (Delta)
all	8419316	2021-09-01	VOC Delta GK (B.1.617.2+AY.*)	GK	AY.29	2	GK-AY.29	21J (Delta)
all	1083201	2021-08-01	VOC Delta GK (B.1.617.2+AY.*)	G	AY.3.1	3	G-AY.3.1	21J (Delta)
all	1083201	2021-08-01	VOC Delta GK (B.1.617.2+AY.*)	GK	AY.3.1	3	GK-AY.3.1	21J (Delta)
all	1083201	2021-09-01	VOC Delta GK (B.1.617.2+AY.*)	G	AY.3.1	1	G-AY.3.1	21J (Delta)
all	1083201	2021-09-01	VOC Delta GK (B.1.617.2+AY.*)	GK	AY.3.1	3	GK-AY.3.1	21J (Delta)
all	1083201	2021-10-01	VOC Delta GK (B.1.617.2+AY.*)	GK	AY.3.1	4	GK-AY.3.1	21J (Delta)
all	1083201	2021-11-01	VOC Delta GK (B.1.617.2+AY.*)	GK	AY.3.1	3	GK-AY.3.1	21J (Delta)
all	1083201	2021-12-01	VOC Delta GK (B.1.617.2+AY.*)	GK	AY.3.1	1	GK-AY.3.1	21J (Delta)
all	777706	2021-08-01	VOC Delta GK (B.1.617.2+AY.*)	GK	AY.3.1	6	GK-AY.3.1	21J (Delta)
all	777706	2021-09-01	VOC Delta GK (B.1.617.2+AY.*)	GK	AY.3.1	14	GK-AY.3.1	21J (Delta)
all	777706	2021-10-01	VOC Delta GK (B.1.617.2+AY.*)	G	AY.3.1	1	G-AY.3.1	21J (Delta)
all	777706	2021-10-01	VOC Delta GK (B.1.617.2+AY.*)	GK	AY.3.1	3	GK-AY.3.1	21J (Delta)
all	777706	2021-11-01	VOC Delta GK (B.1.617.2+AY.*)	GK	AY.3.1	3	GK-AY.3.1	21J (Delta)
all	777706	2021-12-01	VOC Delta GK (B.1.617.2+AY.*)	GK	AY.3.1	1	GK-AY.3.1	21J (Delta)
all	1205380	2021-07-01	VOC Delta GK (B.1.617.2+AY.*)	GK	AY.3.1	1	GK-AY.3.1	21J (Delta)
all	1205380	2021-08-01	VOC Delta GK (B.1.617.2+AY.*)	GK	AY.3.1	22	GK-AY.3.1	21J (Delta)
all	1205380	2021-09-01	VOC Delta GK (B.1.617.2+AY.*)	G	AY.3.1	2	G-AY.3.1	21J (Delta)
all	1205380	2021-09-01	VOC Delta GK (B.1.617.2+AY.*)	GK	AY.3.1	5	GK-AY.3.1	21J (Delta)
all	1205380	2021-10-01	VOC Delta GK (B.1.617.2+AY.*)	GK	AY.3.1	3	GK-AY.3.1	21J (Delta)
all	1205380	2021-12-01	VOC Delta GK (B.1.617.2+AY.*)	GK	AY.3.1	1	GK-AY.3.1	21J (Delta)
all	2319719	2021-09-01	VOC Delta GK (B.1.617.2+AY.*)	GK	AY.3.1	1	GK-AY.3.1	21J (Delta)
all	2319719	2021-11-01	VOC Delta GK (B.1.617.2+AY.*)	GK	AY.3.1	1	GK-AY.3.1	21J (Delta)
all	2319719	2021-12-01	VOC Delta GK (B.1.617.2+AY.*)	GK	AY.3.1	2	GK-AY.3.1	21J (Delta)
all	486158	2021-11-01	VOC Delta GK (B.1.617.2+AY.*)	GK	AY.3.1	1	GK-AY.3.1	21J (Delta)
all	8419316	2021-07-01	VOC Delta GK (B.1.617.2+AY.*)	GK	AY.3.1	16	GK-AY.3.1	21J (Delta)
all	8419316	2021-08-01	VOC Delta GK (B.1.617.2+AY.*)	GK	AY.3.1	85	GK-AY.3.1	21J (Delta)
all	8419316	2021-08-01	VOC Delta GK (B.1.617.2+AY.*)	O	AY.3.1	1	O-AY.3.1	21J (Delta)
all	8419316	2021-09-01	VOC Delta GK (B.1.617.2+AY.*)	G	AY.3.1	3	G-AY.3.1	21J (Delta)
all	8419316	2021-09-01	VOC Delta GK (B.1.617.2+AY.*)	GK	AY.3.1	87	GK-AY.3.1	21J (Delta)
all	8419316	2021-09-01	VOC Delta GK (B.1.617.2+AY.*)	O	AY.3.1	2	O-AY.3.1	21J (Delta)
all	8419316	2021-10-01	VOC Delta GK (B.1.617.2+AY.*)	G	AY.3.1	4	G-AY.3.1	21J (Delta)
all	8419316	2021-10-01	VOC Delta GK (B.1.617.2+AY.*)	GK	AY.3.1	99	GK-AY.3.1	21J (Delta)
all	8419316	2021-10-01	VOC Delta GK (B.1.617.2+AY.*)	O	AY.3.1	1	O-AY.3.1	21J (Delta)
all	8419316	2021-11-01	VOC Delta GK (B.1.617.2+AY.*)	G	AY.3.1	1	G-AY.3.1	21J (Delta)
all	8419316	2021-11-01	VOC Delta GK (B.1.617.2+AY.*)	GK	AY.3.1	51	GK-AY.3.1	21J (Delta)
all	8419316	2021-12-01	VOC Delta GK (B.1.617.2+AY.*)	G	AY.3.1	2	G-AY.3.1	21J (Delta)
all	8419316	2021-12-01	VOC Delta GK (B.1.617.2+AY.*)	GK	AY.3.1	54	GK-AY.3.1	21J (Delta)
all	8419316	2021-12-01	VOC Delta GK (B.1.617.2+AY.*)	GR	AY.3.1	1	GR-AY.3.1	21J (Delta)
all	636657	2021-10-01	VOC Delta GK (B.1.617.2+AY.*)	GK	AY.3.1	1	GK-AY.3.1	21J (Delta)
all	1382480	2021-07-01	VOC Delta GK (B.1.617.2+AY.*)	GK	AY.3.1	2	GK-AY.3.1	21J (Delta)
all	1382480	2021-08-01	VOC Delta GK (B.1.617.2+AY.*)	GK	AY.3.1	8	GK-AY.3.1	21J (Delta)
all	1382480	2021-09-01	VOC Delta GK (B.1.617.2+AY.*)	GK	AY.3.1	7	GK-AY.3.1	21J (Delta)
all	1382480	2021-10-01	VOC Delta GK (B.1.617.2+AY.*)	GK	AY.3.1	4	GK-AY.3.1	21J (Delta)
all	1382480	2021-11-01	VOC Delta GK (B.1.617.2+AY.*)	GK	AY.3.1	7	GK-AY.3.1	21J (Delta)
all	1382480	2021-12-01	VOC Delta GK (B.1.617.2+AY.*)	GK	AY.3.1	1	GK-AY.3.1	21J (Delta)
all	14570000	2021-10-01	VOC Delta GK (B.1.617.2+AY.*)	GK	AY.3.1	1	GK-AY.3.1	21J (Delta)
all	1083201	2021-09-01	VOC Delta GK (B.1.617.2+AY.*)	GK	AY.3.2	1	GK-AY.3.2	NA
all	1083201	2021-10-01	VOC Delta GK (B.1.617.2+AY.*)	GK	AY.3.2	1	GK-AY.3.2	NA
all	8419316	2021-09-01	VOC Delta GK (B.1.617.2+AY.*)	GK	AY.3.2	1	GK-AY.3.2	NA
all	8419316	2021-12-01	VOC Delta GK (B.1.617.2+AY.*)	GK	AY.3.2	4	GK-AY.3.2	NA
all	14570000	2021-11-01	VOC Delta GK (B.1.617.2+AY.*)	GK	AY.3.2	1	GK-AY.3.2	NA
all	14570000	2021-12-01	VOC Delta GK (B.1.617.2+AY.*)	GK	AY.3.2	2	GK-AY.3.2	NA
all	1083201	2021-11-01	VOC Delta GK (B.1.617.2+AY.*)	GK	AY.3.3	1	GK-AY.3.3	NA
all	1083201	2021-12-01	VOC Delta GK (B.1.617.2+AY.*)	GK	AY.3.3	1	GK-AY.3.3	NA
all	2319719	2021-11-01	VOC Delta GK (B.1.617.2+AY.*)	GK	AY.3.3	3	GK-AY.3.3	NA
all	2319719	2021-12-01	VOC Delta GK (B.1.617.2+AY.*)	GK	AY.3.3	5	GK-AY.3.3	NA
all	8419316	2021-09-01	VOC Delta GK (B.1.617.2+AY.*)	GK	AY.3.3	1	GK-AY.3.3	NA
all	8419316	2021-10-01	VOC Delta GK (B.1.617.2+AY.*)	G	AY.3.3	2	G-AY.3.3	NA
all	8419316	2021-10-01	VOC Delta GK (B.1.617.2+AY.*)	GK	AY.3.3	37	GK-AY.3.3	NA
all	8419316	2021-11-01	VOC Delta GK (B.1.617.2+AY.*)	G	AY.3.3	3	G-AY.3.3	NA
all	8419316	2021-11-01	VOC Delta GK (B.1.617.2+AY.*)	GK	AY.3.3	70	GK-AY.3.3	NA
all	8419316	2021-12-01	VOC Delta GK (B.1.617.2+AY.*)	G	AY.3.3	2	G-AY.3.3	NA
all	8419316	2021-12-01	VOC Delta GK (B.1.617.2+AY.*)	GK	AY.3.3	90	GK-AY.3.3	NA
all	8419316	2021-08-01	VOC Delta GK (B.1.617.2+AY.*)	GK	AY.30	1	GK-AY.30	21A (Delta)
all	14570000	2021-09-01	VOC Delta GK (B.1.617.2+AY.*)	GK	AY.32	2	GK-AY.32	21J (Delta)
all	14570000	2021-11-01	VOC Delta GK (B.1.617.2+AY.*)	GK	AY.32	1	GK-AY.32	21J (Delta)
all	1083201	2021-09-01	VOC Delta GK (B.1.617.2+AY.*)	GK	AY.33	1	GK-AY.33	NA
all	1205380	2021-07-01	VOC Delta GK (B.1.617.2+AY.*)	GK	AY.33	2	GK-AY.33	NA
all	1205380	2021-08-01	VOC Delta GK (B.1.617.2+AY.*)	GK	AY.33	1	GK-AY.33	NA
all	1205380	2021-09-01	VOC Delta GK (B.1.617.2+AY.*)	GK	AY.33	2	GK-AY.33	NA
all	486158	2021-10-01	VOC Delta GK (B.1.617.2+AY.*)	GK	AY.33	2	GK-AY.33	NA
all	486158	2021-11-01	VOC Delta GK (B.1.617.2+AY.*)	GK	AY.33	1	GK-AY.33	NA
all	8419316	2021-08-01	VOC Delta GK (B.1.617.2+AY.*)	GK	AY.33	18	GK-AY.33	NA
all	8419316	2021-09-01	VOC Delta GK (B.1.617.2+AY.*)	G	AY.33	1	G-AY.33	NA
all	8419316	2021-09-01	VOC Delta GK (B.1.617.2+AY.*)	GK	AY.33	14	GK-AY.33	NA
all	8419316	2021-10-01	VOC Delta GK (B.1.617.2+AY.*)	GK	AY.33	5	GK-AY.33	NA
all	8419316	2021-11-01	VOC Delta GK (B.1.617.2+AY.*)	GK	AY.33	7	GK-AY.33	NA
all	8419316	2021-12-01	VOC Delta GK (B.1.617.2+AY.*)	GK	AY.33	7	GK-AY.33	NA
all	14570000	2021-07-01	VOC Delta GK (B.1.617.2+AY.*)	GK	AY.33	2	GK-AY.33	NA
all	14570000	2021-08-01	VOC Delta GK (B.1.617.2+AY.*)	GK	AY.33	7	GK-AY.33	NA
all	14570000	2021-09-01	VOC Delta GK (B.1.617.2+AY.*)	GK	AY.33	2	GK-AY.33	NA
all	14570000	2021-12-01	VOC Delta GK (B.1.617.2+AY.*)	GK	AY.33	1	GK-AY.33	NA
all	1205380	2021-10-01	VOC Delta GK (B.1.617.2+AY.*)	GK	AY.34	1	GK-AY.34	21J (Delta)
all	2319719	2021-08-01	VOC Delta GK (B.1.617.2+AY.*)	GK	AY.34	1	GK-AY.34	21J (Delta)
all	2319719	2021-10-01	VOC Delta GK (B.1.617.2+AY.*)	GK	AY.34	1	GK-AY.34	21J (Delta)
all	2319719	2021-12-01	VOC Delta GK (B.1.617.2+AY.*)	GK	AY.34	2	GK-AY.34	21J (Delta)
all	8419316	2021-07-01	VOC Delta GK (B.1.617.2+AY.*)	GK	AY.34	8	GK-AY.34	21J (Delta)
all	8419316	2021-08-01	VOC Delta GK (B.1.617.2+AY.*)	GK	AY.34	12	GK-AY.34	21J (Delta)
all	8419316	2021-09-01	VOC Delta GK (B.1.617.2+AY.*)	GK	AY.34	1	GK-AY.34	21J (Delta)
all	8419316	2021-10-01	VOC Delta GK (B.1.617.2+AY.*)	GK	AY.34	8	GK-AY.34	21J (Delta)
all	8419316	2021-11-01	VOC Delta GK (B.1.617.2+AY.*)	GK	AY.34	3	GK-AY.34	21J (Delta)
all	1382480	2021-09-01	VOC Delta GK (B.1.617.2+AY.*)	GK	AY.34	1	GK-AY.34	21J (Delta)
all	14570000	2021-08-01	VOC Delta GK (B.1.617.2+AY.*)	GK	AY.34	4	GK-AY.34	21J (Delta)
all	14570000	2021-12-01	VOC Delta GK (B.1.617.2+AY.*)	GK	AY.34	3	GK-AY.34	21J (Delta)
all	1083201	2021-12-01	VOC Delta GK (B.1.617.2+AY.*)	GK	AY.34.1	1	GK-AY.34.1	21J (Delta)
all	1205380	2021-08-01	VOC Delta GK (B.1.617.2+AY.*)	GK	AY.34.1	1	GK-AY.34.1	21J (Delta)
all	2840341	2021-07-01	VOC Delta GK (B.1.617.2+AY.*)	GK	AY.34.1	1	GK-AY.34.1	21J (Delta)
all	8419316	2021-07-01	VOC Delta GK (B.1.617.2+AY.*)	GK	AY.34.1	2	GK-AY.34.1	21J (Delta)
all	8419316	2021-08-01	VOC Delta GK (B.1.617.2+AY.*)	GK	AY.34.1	5	GK-AY.34.1	21J (Delta)
all	8419316	2021-09-01	VOC Delta GK (B.1.617.2+AY.*)	GK	AY.34.1	1	GK-AY.34.1	21J (Delta)
all	8419316	2021-10-01	VOC Delta GK (B.1.617.2+AY.*)	GK	AY.34.1	1	GK-AY.34.1	21J (Delta)
all	8419316	2021-11-01	VOC Delta GK (B.1.617.2+AY.*)	GK	AY.34.1	3	GK-AY.34.1	21J (Delta)
all	8419316	2021-12-01	VOC Delta GK (B.1.617.2+AY.*)	GK	AY.34.1	3	GK-AY.34.1	21J (Delta)
all	1382480	2021-11-01	VOC Delta GK (B.1.617.2+AY.*)	GK	AY.34.1	1	GK-AY.34.1	21J (Delta)
all	14570000	2021-12-01	VOC Delta GK (B.1.617.2+AY.*)	GK	AY.34.1	2	GK-AY.34.1	21J (Delta)
all	8419316	2021-08-01	VOC Delta GK (B.1.617.2+AY.*)	GK	AY.34.2	2	GK-AY.34.2	NA
all	8419316	2021-09-01	VOC Delta GK (B.1.617.2+AY.*)	GK	AY.34.2	1	GK-AY.34.2	NA
all	8419316	2021-10-01	VOC Delta GK (B.1.617.2+AY.*)	GK	AY.34.2	1	GK-AY.34.2	NA
all	1083201	2021-08-01	VOC Delta GK (B.1.617.2+AY.*)	G	AY.35	1	G-AY.35	21A (Delta)
all	1083201	2021-08-01	VOC Delta GK (B.1.617.2+AY.*)	GK	AY.35	1	GK-AY.35	21A (Delta)
all	1083201	2021-10-01	VOC Delta GK (B.1.617.2+AY.*)	GK	AY.35	1	GK-AY.35	21A (Delta)
all	1205380	2021-05-01	VOC Delta GK (B.1.617.2+AY.*)	G	AY.35	1	G-AY.35	21A (Delta)
all	1205380	2021-06-01	VOC Delta GK (B.1.617.2+AY.*)	G	AY.35	1	G-AY.35	21A (Delta)
all	1205380	2021-08-01	VOC Delta GK (B.1.617.2+AY.*)	G	AY.35	1	G-AY.35	21A (Delta)
all	1205380	2021-09-01	VOC Delta GK (B.1.617.2+AY.*)	G	AY.35	1	G-AY.35	21A (Delta)
all	2319719	2021-07-01	VOC Delta GK (B.1.617.2+AY.*)	G	AY.35	1	G-AY.35	21A (Delta)
all	2319719	2021-11-01	VOC Delta GK (B.1.617.2+AY.*)	GK	AY.35	1	GK-AY.35	21A (Delta)
all	8419316	2021-07-01	VOC Delta GK (B.1.617.2+AY.*)	G	AY.35	2	G-AY.35	21A (Delta)
all	8419316	2021-07-01	VOC Delta GK (B.1.617.2+AY.*)	GK	AY.35	7	GK-AY.35	21A (Delta)
all	8419316	2021-08-01	VOC Delta GK (B.1.617.2+AY.*)	GK	AY.35	4	GK-AY.35	21A (Delta)
all	8419316	2021-09-01	VOC Delta GK (B.1.617.2+AY.*)	G	AY.35	1	G-AY.35	21A (Delta)
all	8419316	2021-09-01	VOC Delta GK (B.1.617.2+AY.*)	GK	AY.35	9	GK-AY.35	21A (Delta)
all	8419316	2021-10-01	VOC Delta GK (B.1.617.2+AY.*)	G	AY.35	3	G-AY.35	21A (Delta)
all	8419316	2021-10-01	VOC Delta GK (B.1.617.2+AY.*)	GK	AY.35	13	GK-AY.35	21A (Delta)
all	8419316	2021-10-01	VOC Delta GK (B.1.617.2+AY.*)	O	AY.35	1	O-AY.35	21A (Delta)
all	8419316	2021-11-01	VOC Delta GK (B.1.617.2+AY.*)	GK	AY.35	16	GK-AY.35	21A (Delta)
all	8419316	2021-12-01	VOC Delta GK (B.1.617.2+AY.*)	GK	AY.35	3	GK-AY.35	21A (Delta)
all	1382480	2021-08-01	VOC Delta GK (B.1.617.2+AY.*)	GK	AY.35	1	GK-AY.35	21A (Delta)
all	1083201	2021-11-01	VOC Delta GK (B.1.617.2+AY.*)	GK	AY.36	1	GK-AY.36	21J (Delta)
all	777706	2021-08-01	VOC Delta GK (B.1.617.2+AY.*)	GK	AY.36	1	GK-AY.36	21J (Delta)
all	2840341	2021-12-01	VOC Delta GK (B.1.617.2+AY.*)	GK	AY.36	1	GK-AY.36	21J (Delta)
all	2319719	2021-07-01	VOC Delta GK (B.1.617.2+AY.*)	GK	AY.36	1	GK-AY.36	21J (Delta)
all	2319719	2021-08-01	VOC Delta GK (B.1.617.2+AY.*)	GK	AY.36	1	GK-AY.36	21J (Delta)
all	2319719	2021-10-01	VOC Delta GK (B.1.617.2+AY.*)	GK	AY.36	1	GK-AY.36	21J (Delta)
all	2319719	2021-12-01	VOC Delta GK (B.1.617.2+AY.*)	GK	AY.36	1	GK-AY.36	21J (Delta)
all	8419316	2021-07-01	VOC Delta GK (B.1.617.2+AY.*)	G	AY.36	1	G-AY.36	21J (Delta)
all	8419316	2021-07-01	VOC Delta GK (B.1.617.2+AY.*)	GK	AY.36	2	GK-AY.36	21J (Delta)
all	8419316	2021-08-01	VOC Delta GK (B.1.617.2+AY.*)	GK	AY.36	15	GK-AY.36	21J (Delta)
all	8419316	2021-09-01	VOC Delta GK (B.1.617.2+AY.*)	GK	AY.36	25	GK-AY.36	21J (Delta)
all	8419316	2021-10-01	VOC Delta GK (B.1.617.2+AY.*)	GK	AY.36	20	GK-AY.36	21J (Delta)
all	8419316	2021-11-01	VOC Delta GK (B.1.617.2+AY.*)	G	AY.36	1	G-AY.36	21J (Delta)
all	8419316	2021-11-01	VOC Delta GK (B.1.617.2+AY.*)	GK	AY.36	18	GK-AY.36	21J (Delta)
all	8419316	2021-12-01	VOC Delta GK (B.1.617.2+AY.*)	GK	AY.36	7	GK-AY.36	21J (Delta)
all	14570000	2021-07-01	VOC Delta GK (B.1.617.2+AY.*)	GK	AY.36	1	GK-AY.36	21J (Delta)
all	14570000	2021-08-01	VOC Delta GK (B.1.617.2+AY.*)	G	AY.36	1	G-AY.36	21J (Delta)
all	14570000	2021-08-01	VOC Delta GK (B.1.617.2+AY.*)	GK	AY.36	22	GK-AY.36	21J (Delta)
all	14570000	2021-09-01	VOC Delta GK (B.1.617.2+AY.*)	GK	AY.36	13	GK-AY.36	21J (Delta)
all	14570000	2021-10-01	VOC Delta GK (B.1.617.2+AY.*)	GK	AY.36	1	GK-AY.36	21J (Delta)
all	14570000	2021-12-01	VOC Delta GK (B.1.617.2+AY.*)	G	AY.36	1	G-AY.36	21J (Delta)
all	14570000	2021-12-01	VOC Delta GK (B.1.617.2+AY.*)	GK	AY.36	7	GK-AY.36	21J (Delta)
all	8419316	2021-10-01	VOC Delta GK (B.1.617.2+AY.*)	GK	AY.36.1	1	GK-AY.36.1	NA
all	1083201	2021-07-01	VOC Delta GK (B.1.617.2+AY.*)	GK	AY.37	1	GK-AY.37	NA
all	1083201	2021-08-01	VOC Delta GK (B.1.617.2+AY.*)	GK	AY.37	4	GK-AY.37	NA
all	1083201	2021-09-01	VOC Delta GK (B.1.617.2+AY.*)	GK	AY.37	2	GK-AY.37	NA
all	1083201	2021-11-01	VOC Delta GK (B.1.617.2+AY.*)	GK	AY.37	1	GK-AY.37	NA
all	1205380	2021-07-01	VOC Delta GK (B.1.617.2+AY.*)	GK	AY.37	1	GK-AY.37	NA
all	1205380	2021-08-01	VOC Delta GK (B.1.617.2+AY.*)	GK	AY.37	3	GK-AY.37	NA
all	1205380	2021-09-01	VOC Delta GK (B.1.617.2+AY.*)	GK	AY.37	4	GK-AY.37	NA
all	2840341	2021-08-01	VOC Delta GK (B.1.617.2+AY.*)	GK	AY.37	4	GK-AY.37	NA
all	2840341	2021-09-01	VOC Delta GK (B.1.617.2+AY.*)	GK	AY.37	1	GK-AY.37	NA
all	2319719	2021-08-01	VOC Delta GK (B.1.617.2+AY.*)	GK	AY.37	5	GK-AY.37	NA
all	8419316	2021-06-01	VOC Delta GK (B.1.617.2+AY.*)	GK	AY.37	8	GK-AY.37	NA
all	8419316	2021-07-01	VOC Delta GK (B.1.617.2+AY.*)	GK	AY.37	48	GK-AY.37	NA
all	8419316	2021-07-01	VOC Delta GK (B.1.617.2+AY.*)	GV	AY.37	1	GV-AY.37	NA
all	8419316	2021-08-01	VOC Delta GK (B.1.617.2+AY.*)	G	AY.37	3	G-AY.37	NA
all	8419316	2021-08-01	VOC Delta GK (B.1.617.2+AY.*)	GK	AY.37	122	GK-AY.37	NA
all	8419316	2021-08-01	VOC Delta GK (B.1.617.2+AY.*)	GV	AY.37	12	GV-AY.37	NA
all	8419316	2021-08-01	VOC Delta GK (B.1.617.2+AY.*)	O	AY.37	1	O-AY.37	NA
all	8419316	2021-09-01	VOC Delta GK (B.1.617.2+AY.*)	G	AY.37	2	G-AY.37	NA
all	8419316	2021-09-01	VOC Delta GK (B.1.617.2+AY.*)	GK	AY.37	48	GK-AY.37	NA
all	8419316	2021-09-01	VOC Delta GK (B.1.617.2+AY.*)	GV	AY.37	1	GV-AY.37	NA
all	8419316	2021-10-01	VOC Delta GK (B.1.617.2+AY.*)	GK	AY.37	9	GK-AY.37	NA
all	8419316	2021-11-01	VOC Delta GK (B.1.617.2+AY.*)	GK	AY.37	4	GK-AY.37	NA
all	8419316	2021-12-01	VOC Delta GK (B.1.617.2+AY.*)	GK	AY.37	1	GK-AY.37	NA
all	14570000	2021-08-01	VOC Delta GK (B.1.617.2+AY.*)	GK	AY.37	8	GK-AY.37	NA
all	14570000	2021-09-01	VOC Delta GK (B.1.617.2+AY.*)	GK	AY.37	7	GK-AY.37	NA
all	8419316	2021-08-01	VOC Delta GK (B.1.617.2+AY.*)	GK	AY.38	4	GK-AY.38	21I (Delta)
all	14570000	2021-07-01	VOC Delta GK (B.1.617.2+AY.*)	GK	AY.38	2	GK-AY.38	21I (Delta)
all	1083201	2021-12-01	VOC Delta GK (B.1.617.2+AY.*)	GK	AY.39.1	3	GK-AY.39.1	21J (Delta)
all	777706	2021-08-01	VOC Delta GK (B.1.617.2+AY.*)	GK	AY.39.1	4	GK-AY.39.1	21J (Delta)
all	777706	2021-09-01	VOC Delta GK (B.1.617.2+AY.*)	GK	AY.39.1	10	GK-AY.39.1	21J (Delta)
all	777706	2021-10-01	VOC Delta GK (B.1.617.2+AY.*)	GK	AY.39.1	5	GK-AY.39.1	21J (Delta)
all	777706	2021-11-01	VOC Delta GK (B.1.617.2+AY.*)	GK	AY.39.1	1	GK-AY.39.1	21J (Delta)
all	1205380	2021-08-01	VOC Delta GK (B.1.617.2+AY.*)	G	AY.39.1	1	G-AY.39.1	21J (Delta)
all	1205380	2021-08-01	VOC Delta GK (B.1.617.2+AY.*)	GK	AY.39.1	2	GK-AY.39.1	21J (Delta)
all	1205380	2021-09-01	VOC Delta GK (B.1.617.2+AY.*)	GK	AY.39.1	19	GK-AY.39.1	21J (Delta)
all	1205380	2021-10-01	VOC Delta GK (B.1.617.2+AY.*)	GK	AY.39.1	11	GK-AY.39.1	21J (Delta)
all	1205380	2021-11-01	VOC Delta GK (B.1.617.2+AY.*)	GK	AY.39.1	10	GK-AY.39.1	21J (Delta)
all	1205380	2021-12-01	VOC Delta GK (B.1.617.2+AY.*)	GK	AY.39.1	6	GK-AY.39.1	21J (Delta)
all	2840341	2021-08-01	VOC Delta GK (B.1.617.2+AY.*)	GK	AY.39.1	1	GK-AY.39.1	21J (Delta)
all	2840341	2021-09-01	VOC Delta GK (B.1.617.2+AY.*)	GK	AY.39.1	2	GK-AY.39.1	21J (Delta)
all	2319719	2021-08-01	VOC Delta GK (B.1.617.2+AY.*)	GK	AY.39.1	1	GK-AY.39.1	21J (Delta)
all	2319719	2021-09-01	VOC Delta GK (B.1.617.2+AY.*)	GK	AY.39.1	1	GK-AY.39.1	21J (Delta)
all	2319719	2021-11-01	VOC Delta GK (B.1.617.2+AY.*)	GK	AY.39.1	1	GK-AY.39.1	21J (Delta)
all	2319719	2021-12-01	VOC Delta GK (B.1.617.2+AY.*)	GK	AY.39.1	3	GK-AY.39.1	21J (Delta)
all	8419316	2021-07-01	VOC Delta GK (B.1.617.2+AY.*)	G	AY.39.1	1	G-AY.39.1	21J (Delta)
all	8419316	2021-07-01	VOC Delta GK (B.1.617.2+AY.*)	GK	AY.39.1	1	GK-AY.39.1	21J (Delta)
all	8419316	2021-08-01	VOC Delta GK (B.1.617.2+AY.*)	G	AY.39.1	5	G-AY.39.1	21J (Delta)
all	8419316	2021-08-01	VOC Delta GK (B.1.617.2+AY.*)	GK	AY.39.1	39	GK-AY.39.1	21J (Delta)
all	8419316	2021-09-01	VOC Delta GK (B.1.617.2+AY.*)	GK	AY.39.1	61	GK-AY.39.1	21J (Delta)
all	8419316	2021-10-01	VOC Delta GK (B.1.617.2+AY.*)	G	AY.39.1	3	G-AY.39.1	21J (Delta)
all	8419316	2021-10-01	VOC Delta GK (B.1.617.2+AY.*)	GK	AY.39.1	66	GK-AY.39.1	21J (Delta)
all	8419316	2021-11-01	VOC Delta GK (B.1.617.2+AY.*)	GK	AY.39.1	59	GK-AY.39.1	21J (Delta)
all	8419316	2021-12-01	VOC Delta GK (B.1.617.2+AY.*)	GK	AY.39.1	42	GK-AY.39.1	21J (Delta)
all	636657	2021-09-01	VOC Delta GK (B.1.617.2+AY.*)	GK	AY.39.1	3	GK-AY.39.1	21J (Delta)
all	636657	2021-11-01	VOC Delta GK (B.1.617.2+AY.*)	GK	AY.39.1	2	GK-AY.39.1	21J (Delta)
all	1382480	2021-09-01	VOC Delta GK (B.1.617.2+AY.*)	GK	AY.39.1	4	GK-AY.39.1	21J (Delta)
all	1382480	2021-10-01	VOC Delta GK (B.1.617.2+AY.*)	GK	AY.39.1	11	GK-AY.39.1	21J (Delta)
all	1382480	2021-10-01	VOC Delta GK (B.1.617.2+AY.*)	O	AY.39.1	2	O-AY.39.1	21J (Delta)
all	1382480	2021-11-01	VOC Delta GK (B.1.617.2+AY.*)	GK	AY.39.1	1	GK-AY.39.1	21J (Delta)
all	1382480	2021-12-01	VOC Delta GK (B.1.617.2+AY.*)	GK	AY.39.1	6	GK-AY.39.1	21J (Delta)
all	14570000	2021-09-01	VOC Delta GK (B.1.617.2+AY.*)	GK	AY.39.1	1	GK-AY.39.1	21J (Delta)
all	14570000	2021-12-01	VOC Delta GK (B.1.617.2+AY.*)	GK	AY.39.1	8	GK-AY.39.1	21J (Delta)
all	8419316	2021-11-01	VOC Delta GK (B.1.617.2+AY.*)	GK	AY.39.1.2	1	GK-AY.39.1.2	NA
all	2840341	2021-10-01	VOC Delta GK (B.1.617.2+AY.*)	GK	AY.39.2	1	GK-AY.39.2	21J (Delta)
all	2319719	2021-12-01	VOC Delta GK (B.1.617.2+AY.*)	GK	AY.39.2	1	GK-AY.39.2	21J (Delta)
all	8419316	2021-07-01	VOC Delta GK (B.1.617.2+AY.*)	GK	AY.39.2	1	GK-AY.39.2	21J (Delta)
all	8419316	2021-10-01	VOC Delta GK (B.1.617.2+AY.*)	GK	AY.39.2	17	GK-AY.39.2	21J (Delta)
all	8419316	2021-11-01	VOC Delta GK (B.1.617.2+AY.*)	GK	AY.39.2	3	GK-AY.39.2	21J (Delta)
all	8419316	2021-12-01	VOC Delta GK (B.1.617.2+AY.*)	GK	AY.39.2	3	GK-AY.39.2	21J (Delta)
all	8419316	2021-12-01	VOC Delta GK (B.1.617.2+AY.*)	GK	AY.39.3	2	GK-AY.39.3	21J (Delta)
all	1083201	2021-08-01	VOC Delta GK (B.1.617.2+AY.*)	GK	AY.4	1	GK-AY.4	21J (Delta)
all	1083201	2021-12-01	VOC Delta GK (B.1.617.2+AY.*)	GK	AY.4	1	GK-AY.4	21J (Delta)
all	777706	2021-10-01	VOC Delta GK (B.1.617.2+AY.*)	GK	AY.4	1	GK-AY.4	21J (Delta)
all	777706	2021-11-01	VOC Delta GK (B.1.617.2+AY.*)	GK	AY.4	2	GK-AY.4	21J (Delta)
all	777706	2021-12-01	VOC Delta GK (B.1.617.2+AY.*)	GK	AY.4	3	GK-AY.4	21J (Delta)
all	1205380	2021-08-01	VOC Delta GK (B.1.617.2+AY.*)	G	AY.4	1	G-AY.4	21J (Delta)
all	1205380	2021-08-01	VOC Delta GK (B.1.617.2+AY.*)	GK	AY.4	5	GK-AY.4	21J (Delta)
all	1205380	2021-09-01	VOC Delta GK (B.1.617.2+AY.*)	G	AY.4	1	G-AY.4	21J (Delta)
all	1205380	2021-09-01	VOC Delta GK (B.1.617.2+AY.*)	GK	AY.4	28	GK-AY.4	21J (Delta)
all	1205380	2021-10-01	VOC Delta GK (B.1.617.2+AY.*)	GK	AY.4	4	GK-AY.4	21J (Delta)
all	1205380	2021-10-01	VOC Delta GK (B.1.617.2+AY.*)	O	AY.4	1	O-AY.4	21J (Delta)
all	1205380	2021-11-01	VOC Delta GK (B.1.617.2+AY.*)	GK	AY.4	13	GK-AY.4	21J (Delta)
all	1205380	2021-12-01	VOC Delta GK (B.1.617.2+AY.*)	GK	AY.4	11	GK-AY.4	21J (Delta)
all	2319719	2021-07-01	VOC Delta GK (B.1.617.2+AY.*)	GK	AY.4	3	GK-AY.4	21J (Delta)
all	2319719	2021-09-01	VOC Delta GK (B.1.617.2+AY.*)	GK	AY.4	1	GK-AY.4	21J (Delta)
all	2319719	2021-10-01	VOC Delta GK (B.1.617.2+AY.*)	G	AY.4	2	G-AY.4	21J (Delta)
all	2319719	2021-11-01	VOC Delta GK (B.1.617.2+AY.*)	GK	AY.4	2	GK-AY.4	21J (Delta)
all	2319719	2021-12-01	VOC Delta GK (B.1.617.2+AY.*)	GK	AY.4	3	GK-AY.4	21J (Delta)
all	8419316	2021-07-01	VOC Delta GK (B.1.617.2+AY.*)	GK	AY.4	11	GK-AY.4	21J (Delta)
all	8419316	2021-08-01	VOC Delta GK (B.1.617.2+AY.*)	G	AY.4	3	G-AY.4	21J (Delta)
all	8419316	2021-08-01	VOC Delta GK (B.1.617.2+AY.*)	GK	AY.4	71	GK-AY.4	21J (Delta)
all	8419316	2021-08-01	VOC Delta GK (B.1.617.2+AY.*)	O	AY.4	1	O-AY.4	21J (Delta)
all	8419316	2021-09-01	VOC Delta GK (B.1.617.2+AY.*)	G	AY.4	2	G-AY.4	21J (Delta)
all	8419316	2021-09-01	VOC Delta GK (B.1.617.2+AY.*)	GK	AY.4	113	GK-AY.4	21J (Delta)
all	8419316	2021-10-01	VOC Delta GK (B.1.617.2+AY.*)	G	AY.4	3	G-AY.4	21J (Delta)
all	8419316	2021-10-01	VOC Delta GK (B.1.617.2+AY.*)	GH	AY.4	1	GH-AY.4	21J (Delta)
all	8419316	2021-10-01	VOC Delta GK (B.1.617.2+AY.*)	GK	AY.4	142	GK-AY.4	21J (Delta)
all	8419316	2021-11-01	VOC Delta GK (B.1.617.2+AY.*)	G	AY.4	2	G-AY.4	21J (Delta)
all	8419316	2021-11-01	VOC Delta GK (B.1.617.2+AY.*)	GK	AY.4	121	GK-AY.4	21J (Delta)
all	8419316	2021-11-01	VOC Delta GK (B.1.617.2+AY.*)	O	AY.4	1	O-AY.4	21J (Delta)
all	8419316	2021-12-01	VOC Delta GK (B.1.617.2+AY.*)	G	AY.4	1	G-AY.4	21J (Delta)
all	8419316	2021-12-01	VOC Delta GK (B.1.617.2+AY.*)	GH	AY.4	1	GH-AY.4	21J (Delta)
all	8419316	2021-12-01	VOC Delta GK (B.1.617.2+AY.*)	GK	AY.4	133	GK-AY.4	21J (Delta)
all	421361	2021-10-01	VOC Delta GK (B.1.617.2+AY.*)	G	AY.4	2	G-AY.4	21J (Delta)
all	421361	2021-10-01	VOC Delta GK (B.1.617.2+AY.*)	GK	AY.4	3	GK-AY.4	21J (Delta)
all	421361	2021-11-01	VOC Delta GK (B.1.617.2+AY.*)	GK	AY.4	1	GK-AY.4	21J (Delta)
all	421361	2021-12-01	VOC Delta GK (B.1.617.2+AY.*)	GK	AY.4	1	GK-AY.4	21J (Delta)
all	636657	2021-09-01	VOC Delta GK (B.1.617.2+AY.*)	GK	AY.4	1	GK-AY.4	21J (Delta)
all	636657	2021-12-01	VOC Delta GK (B.1.617.2+AY.*)	GK	AY.4	1	GK-AY.4	21J (Delta)
all	1382480	2021-10-01	VOC Delta GK (B.1.617.2+AY.*)	G	AY.4	1	G-AY.4	21J (Delta)
all	1382480	2021-10-01	VOC Delta GK (B.1.617.2+AY.*)	GK	AY.4	13	GK-AY.4	21J (Delta)
all	1382480	2021-11-01	VOC Delta GK (B.1.617.2+AY.*)	GK	AY.4	30	GK-AY.4	21J (Delta)
all	1382480	2021-12-01	VOC Delta GK (B.1.617.2+AY.*)	GK	AY.4	12	GK-AY.4	21J (Delta)
all	14570000	2021-06-01	VOC Delta GK (B.1.617.2+AY.*)	GK	AY.4	4	GK-AY.4	21J (Delta)
all	14570000	2021-07-01	VOC Delta GK (B.1.617.2+AY.*)	GK	AY.4	3	GK-AY.4	21J (Delta)
all	14570000	2021-08-01	VOC Delta GK (B.1.617.2+AY.*)	GK	AY.4	13	GK-AY.4	21J (Delta)
all	14570000	2021-09-01	VOC Delta GK (B.1.617.2+AY.*)	GK	AY.4	2	GK-AY.4	21J (Delta)
all	14570000	2021-10-01	VOC Delta GK (B.1.617.2+AY.*)	GK	AY.4	3	GK-AY.4	21J (Delta)
all	14570000	2021-11-01	VOC Delta GK (B.1.617.2+AY.*)	GK	AY.4	12	GK-AY.4	21J (Delta)
all	14570000	2021-12-01	VOC Delta GK (B.1.617.2+AY.*)	G	AY.4	1	G-AY.4	21J (Delta)
all	14570000	2021-12-01	VOC Delta GK (B.1.617.2+AY.*)	GK	AY.4	58	GK-AY.4	21J (Delta)
all	8419316	2021-12-01	VOC Delta GK (B.1.617.2+AY.*)	GK	AY.4.10	1	GK-AY.4.10	NA
all	1382480	2021-08-01	VOC Delta GK (B.1.617.2+AY.*)	GK	AY.4.12	1	GK-AY.4.12	NA
all	8419316	2021-11-01	VOC Delta GK (B.1.617.2+AY.*)	GK	AY.4.15	1	GK-AY.4.15	NA
all	8419316	2021-11-01	VOC Delta GK (B.1.617.2+AY.*)	GK	AY.4.17	1	GK-AY.4.17	NA
all	2319719	2021-10-01	VOC Delta GK (B.1.617.2+AY.*)	GK	AY.4.2	1	GK-AY.4.2	NA
all	2319719	2021-10-01	VOC Delta GK (B.1.617.2+AY.*)	GV	AY.4.2	1	GV-AY.4.2	NA
all	2319719	2021-11-01	VOC Delta GK (B.1.617.2+AY.*)	GK	AY.4.2	5	GK-AY.4.2	NA
all	8419316	2021-10-01	VOC Delta GK (B.1.617.2+AY.*)	GK	AY.4.2	3	GK-AY.4.2	NA
all	8419316	2021-11-01	VOC Delta GK (B.1.617.2+AY.*)	GK	AY.4.2	15	GK-AY.4.2	NA
all	8419316	2021-11-01	VOC Delta GK (B.1.617.2+AY.*)	GV	AY.4.2	1	GV-AY.4.2	NA
all	8419316	2021-12-01	VOC Delta GK (B.1.617.2+AY.*)	GK	AY.4.2	14	GK-AY.4.2	NA
all	14570000	2021-12-01	VOC Delta GK (B.1.617.2+AY.*)	GK	AY.4.2	2	GK-AY.4.2	NA
all	8419316	2021-11-01	VOC Delta GK (B.1.617.2+AY.*)	GK	AY.4.2.1	5	GK-AY.4.2.1	NA
all	8419316	2021-12-01	VOC Delta GK (B.1.617.2+AY.*)	GK	AY.4.2.1	5	GK-AY.4.2.1	NA
all	14570000	2021-11-01	VOC Delta GK (B.1.617.2+AY.*)	GK	AY.4.2.1	2	GK-AY.4.2.1	NA
all	14570000	2021-12-01	VOC Delta GK (B.1.617.2+AY.*)	GK	AY.4.2.1	37	GK-AY.4.2.1	NA
all	14570000	2021-12-01	VOC Delta GK (B.1.617.2+AY.*)	GV	AY.4.2.1	1	GV-AY.4.2.1	NA
all	8419316	2021-08-01	VOC Delta GK (B.1.617.2+AY.*)	GK	AY.4.2.2	1	GK-AY.4.2.2	NA
all	8419316	2021-11-01	VOC Delta GK (B.1.617.2+AY.*)	GK	AY.4.2.2	4	GK-AY.4.2.2	NA
all	8419316	2021-12-01	VOC Delta GK (B.1.617.2+AY.*)	GK	AY.4.2.2	3	GK-AY.4.2.2	NA
all	14570000	2021-11-01	VOC Delta GK (B.1.617.2+AY.*)	GK	AY.4.2.2	1	GK-AY.4.2.2	NA
all	14570000	2021-12-01	VOC Delta GK (B.1.617.2+AY.*)	GK	AY.4.2.2	5	GK-AY.4.2.2	NA
all	14570000	2021-12-01	VOC Delta GK (B.1.617.2+AY.*)	GV	AY.4.2.2	1	GV-AY.4.2.2	NA
all	14570000	2021-12-01	VOC Delta GK (B.1.617.2+AY.*)	GK	AY.4.2.3	1	GK-AY.4.2.3	21J (Delta)
all	8419316	2021-10-01	VOC Delta GK (B.1.617.2+AY.*)	GK	AY.4.3	4	GK-AY.4.3	NA
all	8419316	2021-09-01	VOC Delta GK (B.1.617.2+AY.*)	G	AY.4.4	1	G-AY.4.4	NA
all	8419316	2021-09-01	VOC Delta GK (B.1.617.2+AY.*)	GK	AY.4.4	4	GK-AY.4.4	NA
all	14570000	2021-08-01	VOC Delta GK (B.1.617.2+AY.*)	GK	AY.4.4	1	GK-AY.4.4	NA
all	8419316	2021-11-01	VOC Delta GK (B.1.617.2+AY.*)	GK	AY.4.5	1	GK-AY.4.5	NA
all	8419316	2021-12-01	VOC Delta GK (B.1.617.2+AY.*)	GK	AY.4.5	4	GK-AY.4.5	NA
all	14570000	2021-11-01	VOC Delta GK (B.1.617.2+AY.*)	GK	AY.4.5	1	GK-AY.4.5	NA
all	8419316	2021-11-01	VOC Delta GK (B.1.617.2+AY.*)	GK	AY.4.6	1	GK-AY.4.6	NA
all	2319719	2021-08-01	VOC Delta GK (B.1.617.2+AY.*)	GK	AY.4.7	1	GK-AY.4.7	21J (Delta)
all	8419316	2021-07-01	VOC Delta GK (B.1.617.2+AY.*)	GK	AY.4.7	1	GK-AY.4.7	21J (Delta)
all	8419316	2021-08-01	VOC Delta GK (B.1.617.2+AY.*)	GK	AY.4.7	7	GK-AY.4.7	21J (Delta)
all	8419316	2021-09-01	VOC Delta GK (B.1.617.2+AY.*)	GK	AY.4.7	1	GK-AY.4.7	21J (Delta)
all	1382480	2021-08-01	VOC Delta GK (B.1.617.2+AY.*)	GK	AY.4.7	1	GK-AY.4.7	21J (Delta)
all	14570000	2021-05-01	VOC Delta GK (B.1.617.2+AY.*)	GK	AY.4.7	4	GK-AY.4.7	21J (Delta)
all	8419316	2021-09-01	VOC Delta GK (B.1.617.2+AY.*)	GK	AY.4.8	1	GK-AY.4.8	NA
all	8419316	2021-11-01	VOC Delta GK (B.1.617.2+AY.*)	GK	AY.4.8	1	GK-AY.4.8	NA
all	8419316	2021-10-01	VOC Delta GK (B.1.617.2+AY.*)	G	AY.4.9	1	G-AY.4.9	NA
all	8419316	2021-12-01	VOC Delta GK (B.1.617.2+AY.*)	GK	AY.4.9	1	GK-AY.4.9	NA
all	8419316	2021-07-01	VOC Delta GK (B.1.617.2+AY.*)	GK	AY.42	1	GK-AY.42	21J (Delta)
all	8419316	2021-08-01	VOC Delta GK (B.1.617.2+AY.*)	G	AY.42	1	G-AY.42	21J (Delta)
all	8419316	2021-08-01	VOC Delta GK (B.1.617.2+AY.*)	GK	AY.42	10	GK-AY.42	21J (Delta)
all	8419316	2021-09-01	VOC Delta GK (B.1.617.2+AY.*)	GK	AY.42	2	GK-AY.42	21J (Delta)
all	8419316	2021-10-01	VOC Delta GK (B.1.617.2+AY.*)	GK	AY.42	8	GK-AY.42	21J (Delta)
all	8419316	2021-11-01	VOC Delta GK (B.1.617.2+AY.*)	GK	AY.42	16	GK-AY.42	21J (Delta)
all	8419316	2021-12-01	VOC Delta GK (B.1.617.2+AY.*)	GK	AY.42	5	GK-AY.42	21J (Delta)
all	1382480	2021-11-01	VOC Delta GK (B.1.617.2+AY.*)	GK	AY.42	1	GK-AY.42	21J (Delta)
all	1382480	2021-12-01	VOC Delta GK (B.1.617.2+AY.*)	GK	AY.42	1	GK-AY.42	21J (Delta)
all	14570000	2021-08-01	VOC Delta GK (B.1.617.2+AY.*)	GK	AY.42	1	GK-AY.42	21J (Delta)
all	14570000	2021-12-01	VOC Delta GK (B.1.617.2+AY.*)	GK	AY.42	3	GK-AY.42	21J (Delta)
all	8419316	2021-07-01	VOC Delta GK (B.1.617.2+AY.*)	GK	AY.42.1	2	GK-AY.42.1	NA
all	1083201	2021-07-01	VOC Delta GK (B.1.617.2+AY.*)	GK	AY.43	1	GK-AY.43	21J (Delta)
all	1083201	2021-08-01	VOC Delta GK (B.1.617.2+AY.*)	GK	AY.43	1	GK-AY.43	21J (Delta)
all	1083201	2021-09-01	VOC Delta GK (B.1.617.2+AY.*)	GK	AY.43	1	GK-AY.43	21J (Delta)
all	1205380	2021-07-01	VOC Delta GK (B.1.617.2+AY.*)	GK	AY.43	2	GK-AY.43	21J (Delta)
all	1205380	2021-11-01	VOC Delta GK (B.1.617.2+AY.*)	GK	AY.43	1	GK-AY.43	21J (Delta)
all	2840341	2021-09-01	VOC Delta GK (B.1.617.2+AY.*)	GK	AY.43	1	GK-AY.43	21J (Delta)
all	2840341	2021-10-01	VOC Delta GK (B.1.617.2+AY.*)	GK	AY.43	1	GK-AY.43	21J (Delta)
all	2840341	2021-12-01	VOC Delta GK (B.1.617.2+AY.*)	GK	AY.43	1	GK-AY.43	21J (Delta)
all	2319719	2021-08-01	VOC Delta GK (B.1.617.2+AY.*)	GK	AY.43	1	GK-AY.43	21J (Delta)
all	2319719	2021-09-01	VOC Delta GK (B.1.617.2+AY.*)	G	AY.43	1	G-AY.43	21J (Delta)
all	2319719	2021-09-01	VOC Delta GK (B.1.617.2+AY.*)	GK	AY.43	1	GK-AY.43	21J (Delta)
all	2319719	2021-11-01	VOC Delta GK (B.1.617.2+AY.*)	GK	AY.43	2	GK-AY.43	21J (Delta)
all	2319719	2021-12-01	VOC Delta GK (B.1.617.2+AY.*)	GK	AY.43	8	GK-AY.43	21J (Delta)
all	8419316	2021-06-01	VOC Delta GK (B.1.617.2+AY.*)	GK	AY.43	1	GK-AY.43	21J (Delta)
all	8419316	2021-07-01	VOC Delta GK (B.1.617.2+AY.*)	GK	AY.43	17	GK-AY.43	21J (Delta)
all	8419316	2021-08-01	VOC Delta GK (B.1.617.2+AY.*)	G	AY.43	2	G-AY.43	21J (Delta)
all	8419316	2021-08-01	VOC Delta GK (B.1.617.2+AY.*)	GK	AY.43	66	GK-AY.43	21J (Delta)
all	8419316	2021-09-01	VOC Delta GK (B.1.617.2+AY.*)	G	AY.43	9	G-AY.43	21J (Delta)
all	8419316	2021-09-01	VOC Delta GK (B.1.617.2+AY.*)	GK	AY.43	63	GK-AY.43	21J (Delta)
all	8419316	2021-09-01	VOC Delta GK (B.1.617.2+AY.*)	O	AY.43	1	O-AY.43	21J (Delta)
all	8419316	2021-10-01	VOC Delta GK (B.1.617.2+AY.*)	G	AY.43	3	G-AY.43	21J (Delta)
all	8419316	2021-10-01	VOC Delta GK (B.1.617.2+AY.*)	GK	AY.43	110	GK-AY.43	21J (Delta)
all	8419316	2021-10-01	VOC Delta GK (B.1.617.2+AY.*)	O	AY.43	2	O-AY.43	21J (Delta)
all	8419316	2021-11-01	VOC Delta GK (B.1.617.2+AY.*)	G	AY.43	4	G-AY.43	21J (Delta)
all	8419316	2021-11-01	VOC Delta GK (B.1.617.2+AY.*)	GK	AY.43	151	GK-AY.43	21J (Delta)
all	8419316	2021-11-01	VOC Delta GK (B.1.617.2+AY.*)	O	AY.43	2	O-AY.43	21J (Delta)
all	8419316	2021-12-01	VOC Delta GK (B.1.617.2+AY.*)	G	AY.43	2	G-AY.43	21J (Delta)
all	8419316	2021-12-01	VOC Delta GK (B.1.617.2+AY.*)	GK	AY.43	158	GK-AY.43	21J (Delta)
all	8419316	2021-12-01	VOC Delta GK (B.1.617.2+AY.*)	O	AY.43	1	O-AY.43	21J (Delta)
all	8419316	2021-12-01	VOC Omicron GRA (B.1.1.529+BA.*)	GRA	AY.43	1	GRA-AY.43	21J (Delta)
all	421361	2021-11-01	VOC Delta GK (B.1.617.2+AY.*)	GK	AY.43	1	GK-AY.43	21J (Delta)
all	1382480	2021-11-01	VOC Delta GK (B.1.617.2+AY.*)	GK	AY.43	1	GK-AY.43	21J (Delta)
all	1382480	2021-12-01	VOC Delta GK (B.1.617.2+AY.*)	GK	AY.43	4	GK-AY.43	21J (Delta)
all	14570000	2021-07-01	VOC Delta GK (B.1.617.2+AY.*)	GK	AY.43	1	GK-AY.43	21J (Delta)
all	14570000	2021-08-01	VOC Delta GK (B.1.617.2+AY.*)	G	AY.43	1	G-AY.43	21J (Delta)
all	14570000	2021-08-01	VOC Delta GK (B.1.617.2+AY.*)	GK	AY.43	6	GK-AY.43	21J (Delta)
all	14570000	2021-09-01	VOC Delta GK (B.1.617.2+AY.*)	GK	AY.43	3	GK-AY.43	21J (Delta)
all	14570000	2021-11-01	VOC Delta GK (B.1.617.2+AY.*)	GK	AY.43	16	GK-AY.43	21J (Delta)
all	14570000	2021-12-01	VOC Delta GK (B.1.617.2+AY.*)	GK	AY.43	58	GK-AY.43	21J (Delta)
all	8419316	2021-10-01	VOC Delta GK (B.1.617.2+AY.*)	GK	AY.43.3	2	GK-AY.43.3	21J (Delta)
all	8419316	2021-11-01	VOC Delta GK (B.1.617.2+AY.*)	GK	AY.43.3	7	GK-AY.43.3	21J (Delta)
all	8419316	2021-12-01	VOC Delta GK (B.1.617.2+AY.*)	GK	AY.43.3	12	GK-AY.43.3	21J (Delta)
all	8419316	2021-09-01	VOC Delta GK (B.1.617.2+AY.*)	GK	AY.43.8	1	GK-AY.43.8	NA
all	8419316	2021-11-01	VOC Delta GK (B.1.617.2+AY.*)	GK	AY.43.8	5	GK-AY.43.8	NA
all	14570000	2021-12-01	VOC Delta GK (B.1.617.2+AY.*)	GK	AY.43.8	1	GK-AY.43.8	NA
all	1083201	2021-10-01	VOC Delta GK (B.1.617.2+AY.*)	GK	AY.45	1	GK-AY.45	21J (Delta)
all	777706	2021-10-01	VOC Delta GK (B.1.617.2+AY.*)	G	AY.45	3	G-AY.45	21J (Delta)
all	777706	2021-10-01	VOC Delta GK (B.1.617.2+AY.*)	GK	AY.45	4	GK-AY.45	21J (Delta)
all	777706	2021-11-01	VOC Delta GK (B.1.617.2+AY.*)	GK	AY.45	4	GK-AY.45	21J (Delta)
all	1205380	2021-11-01	VOC Delta GK (B.1.617.2+AY.*)	GK	AY.45	1	GK-AY.45	21J (Delta)
all	2319719	2021-09-01	VOC Delta GK (B.1.617.2+AY.*)	GK	AY.45	1	GK-AY.45	21J (Delta)
all	2319719	2021-12-01	VOC Delta GK (B.1.617.2+AY.*)	GK	AY.45	1	GK-AY.45	21J (Delta)
all	8419316	2021-09-01	VOC Delta GK (B.1.617.2+AY.*)	GK	AY.45	7	GK-AY.45	21J (Delta)
all	8419316	2021-10-01	VOC Delta GK (B.1.617.2+AY.*)	GK	AY.45	27	GK-AY.45	21J (Delta)
all	8419316	2021-10-01	VOC Delta GK (B.1.617.2+AY.*)	O	AY.45	1	O-AY.45	21J (Delta)
all	8419316	2021-11-01	VOC Delta GK (B.1.617.2+AY.*)	GK	AY.45	11	GK-AY.45	21J (Delta)
all	8419316	2021-12-01	VOC Delta GK (B.1.617.2+AY.*)	GK	AY.45	3	GK-AY.45	21J (Delta)
all	14570000	2021-08-01	VOC Delta GK (B.1.617.2+AY.*)	GK	AY.45	2	GK-AY.45	21J (Delta)
all	1205380	2021-10-01	VOC Delta GK (B.1.617.2+AY.*)	GK	AY.46	1	GK-AY.46	21J (Delta)
all	1205380	2021-11-01	VOC Delta GK (B.1.617.2+AY.*)	GK	AY.46	2	GK-AY.46	21J (Delta)
all	8419316	2021-05-01	VOC Delta GK (B.1.617.2+AY.*)	GK	AY.46	3	GK-AY.46	21J (Delta)
all	8419316	2021-07-01	VOC Delta GK (B.1.617.2+AY.*)	GK	AY.46	4	GK-AY.46	21J (Delta)
all	8419316	2021-08-01	VOC Delta GK (B.1.617.2+AY.*)	GK	AY.46	5	GK-AY.46	21J (Delta)
all	8419316	2021-09-01	VOC Delta GK (B.1.617.2+AY.*)	GK	AY.46	8	GK-AY.46	21J (Delta)
all	8419316	2021-10-01	VOC Delta GK (B.1.617.2+AY.*)	GK	AY.46	1	GK-AY.46	21J (Delta)
all	8419316	2021-11-01	VOC Delta GK (B.1.617.2+AY.*)	GK	AY.46	10	GK-AY.46	21J (Delta)
all	14570000	2021-06-01	VOC Delta GK (B.1.617.2+AY.*)	GK	AY.46	9	GK-AY.46	21J (Delta)
all	14570000	2021-08-01	VOC Delta GK (B.1.617.2+AY.*)	GK	AY.46	3	GK-AY.46	21J (Delta)
all	14570000	2021-09-01	VOC Delta GK (B.1.617.2+AY.*)	GK	AY.46	1	GK-AY.46	21J (Delta)
all	14570000	2021-12-01	VOC Delta GK (B.1.617.2+AY.*)	GK	AY.46	4	GK-AY.46	21J (Delta)
all	1083201	2021-11-01	VOC Delta GK (B.1.617.2+AY.*)	GK	AY.46.1	1	GK-AY.46.1	21J (Delta)
all	2840341	2021-08-01	VOC Delta GK (B.1.617.2+AY.*)	GK	AY.46.1	1	GK-AY.46.1	21J (Delta)
all	2319719	2021-08-01	VOC Delta GK (B.1.617.2+AY.*)	G	AY.46.1	1	G-AY.46.1	21J (Delta)
all	2319719	2021-08-01	VOC Delta GK (B.1.617.2+AY.*)	GK	AY.46.1	5	GK-AY.46.1	21J (Delta)
all	2319719	2021-09-01	VOC Delta GK (B.1.617.2+AY.*)	GK	AY.46.1	1	GK-AY.46.1	21J (Delta)
all	2319719	2021-11-01	VOC Delta GK (B.1.617.2+AY.*)	GK	AY.46.1	1	GK-AY.46.1	21J (Delta)
all	8419316	2021-07-01	VOC Delta GK (B.1.617.2+AY.*)	GK	AY.46.1	1	GK-AY.46.1	21J (Delta)
all	8419316	2021-08-01	VOC Delta GK (B.1.617.2+AY.*)	G	AY.46.1	4	G-AY.46.1	21J (Delta)
all	8419316	2021-08-01	VOC Delta GK (B.1.617.2+AY.*)	GK	AY.46.1	40	GK-AY.46.1	21J (Delta)
all	8419316	2021-09-01	VOC Delta GK (B.1.617.2+AY.*)	G	AY.46.1	1	G-AY.46.1	21J (Delta)
all	8419316	2021-09-01	VOC Delta GK (B.1.617.2+AY.*)	GK	AY.46.1	24	GK-AY.46.1	21J (Delta)
all	8419316	2021-10-01	VOC Delta GK (B.1.617.2+AY.*)	GK	AY.46.1	10	GK-AY.46.1	21J (Delta)
all	8419316	2021-11-01	VOC Delta GK (B.1.617.2+AY.*)	GK	AY.46.1	8	GK-AY.46.1	21J (Delta)
all	8419316	2021-12-01	VOC Delta GK (B.1.617.2+AY.*)	GK	AY.46.1	29	GK-AY.46.1	21J (Delta)
all	421361	2021-12-01	VOC Delta GK (B.1.617.2+AY.*)	GK	AY.46.1	1	GK-AY.46.1	21J (Delta)
all	1382480	2021-12-01	VOC Delta GK (B.1.617.2+AY.*)	GK	AY.46.1	1	GK-AY.46.1	21J (Delta)
all	14570000	2021-08-01	VOC Delta GK (B.1.617.2+AY.*)	G	AY.46.1	1	G-AY.46.1	21J (Delta)
all	14570000	2021-11-01	VOC Delta GK (B.1.617.2+AY.*)	GK	AY.46.1	1	GK-AY.46.1	21J (Delta)
all	1205380	2021-10-01	VOC Delta GK (B.1.617.2+AY.*)	GK	AY.46.2	1	GK-AY.46.2	NA
all	8419316	2021-09-01	VOC Delta GK (B.1.617.2+AY.*)	GK	AY.46.2	1	GK-AY.46.2	NA
all	777706	2021-09-01	VOC Delta GK (B.1.617.2+AY.*)	GK	AY.46.4	1	GK-AY.46.4	21J (Delta)
all	2319719	2021-10-01	VOC Delta GK (B.1.617.2+AY.*)	GK	AY.46.4	1	GK-AY.46.4	21J (Delta)
all	2319719	2021-11-01	VOC Delta GK (B.1.617.2+AY.*)	GK	AY.46.4	1	GK-AY.46.4	21J (Delta)
all	8419316	2021-08-01	VOC Delta GK (B.1.617.2+AY.*)	GK	AY.46.4	10	GK-AY.46.4	21J (Delta)
all	8419316	2021-09-01	VOC Delta GK (B.1.617.2+AY.*)	G	AY.46.4	1	G-AY.46.4	21J (Delta)
all	8419316	2021-09-01	VOC Delta GK (B.1.617.2+AY.*)	GK	AY.46.4	15	GK-AY.46.4	21J (Delta)
all	8419316	2021-10-01	VOC Delta GK (B.1.617.2+AY.*)	GK	AY.46.4	12	GK-AY.46.4	21J (Delta)
all	8419316	2021-11-01	VOC Delta GK (B.1.617.2+AY.*)	GK	AY.46.4	9	GK-AY.46.4	21J (Delta)
all	8419316	2021-12-01	VOC Delta GK (B.1.617.2+AY.*)	GK	AY.46.4	4	GK-AY.46.4	21J (Delta)
all	636657	2021-10-01	VOC Delta GK (B.1.617.2+AY.*)	GK	AY.46.4	1	GK-AY.46.4	21J (Delta)
all	636657	2021-11-01	VOC Delta GK (B.1.617.2+AY.*)	GK	AY.46.4	1	GK-AY.46.4	21J (Delta)
all	1382480	2021-08-01	VOC Delta GK (B.1.617.2+AY.*)	GK	AY.46.4	3	GK-AY.46.4	21J (Delta)
all	1382480	2021-09-01	VOC Delta GK (B.1.617.2+AY.*)	GK	AY.46.4	1	GK-AY.46.4	21J (Delta)
all	1382480	2021-11-01	VOC Delta GK (B.1.617.2+AY.*)	GK	AY.46.4	5	GK-AY.46.4	21J (Delta)
all	1382480	2021-12-01	VOC Delta GK (B.1.617.2+AY.*)	GK	AY.46.4	2	GK-AY.46.4	21J (Delta)
all	14570000	2021-08-01	VOC Delta GK (B.1.617.2+AY.*)	GK	AY.46.4	1	GK-AY.46.4	21J (Delta)
all	8419316	2021-12-01	VOC Delta GK (B.1.617.2+AY.*)	GK	AY.46.5	1	GK-AY.46.5	NA
all	2319719	2021-09-01	VOC Delta GK (B.1.617.2+AY.*)	GK	AY.46.6	1	GK-AY.46.6	21J (Delta)
all	2319719	2021-11-01	VOC Delta GK (B.1.617.2+AY.*)	GK	AY.46.6	1	GK-AY.46.6	21J (Delta)
all	8419316	2021-08-01	VOC Delta GK (B.1.617.2+AY.*)	GK	AY.46.6	2	GK-AY.46.6	21J (Delta)
all	8419316	2021-09-01	VOC Delta GK (B.1.617.2+AY.*)	G	AY.46.6	1	G-AY.46.6	21J (Delta)
all	8419316	2021-09-01	VOC Delta GK (B.1.617.2+AY.*)	GK	AY.46.6	33	GK-AY.46.6	21J (Delta)
all	8419316	2021-10-01	VOC Delta GK (B.1.617.2+AY.*)	GK	AY.46.6	9	GK-AY.46.6	21J (Delta)
all	8419316	2021-11-01	VOC Delta GK (B.1.617.2+AY.*)	G	AY.46.6	1	G-AY.46.6	21J (Delta)
all	8419316	2021-11-01	VOC Delta GK (B.1.617.2+AY.*)	GK	AY.46.6	12	GK-AY.46.6	21J (Delta)
all	8419316	2021-12-01	VOC Delta GK (B.1.617.2+AY.*)	GK	AY.46.6	4	GK-AY.46.6	21J (Delta)
all	1382480	2021-08-01	VOC Delta GK (B.1.617.2+AY.*)	GK	AY.46.6	1	GK-AY.46.6	21J (Delta)
all	14570000	2021-08-01	VOC Delta GK (B.1.617.2+AY.*)	GK	AY.46.6	1	GK-AY.46.6	21J (Delta)
all	14570000	2021-12-01	VOC Delta GK (B.1.617.2+AY.*)	GK	AY.46.6	1	GK-AY.46.6	21J (Delta)
all	2319719	2021-08-01	VOC Delta GK (B.1.617.2+AY.*)	G	AY.48	1	G-AY.48	NA
all	2319719	2021-08-01	VOC Delta GK (B.1.617.2+AY.*)	GK	AY.48	1	GK-AY.48	NA
all	8419316	2021-07-01	VOC Delta GK (B.1.617.2+AY.*)	GK	AY.48	2	GK-AY.48	NA
all	8419316	2021-08-01	VOC Delta GK (B.1.617.2+AY.*)	GK	AY.48	7	GK-AY.48	NA
all	14570000	2021-11-01	VOC Delta GK (B.1.617.2+AY.*)	GK	AY.48	1	GK-AY.48	NA
all	14570000	2021-12-01	VOC Delta GK (B.1.617.2+AY.*)	GK	AY.48	12	GK-AY.48	NA
all	14570000	2021-07-01	VOC Delta GK (B.1.617.2+AY.*)	GK	AY.49	1	GK-AY.49	21A (Delta)
all	1083201	2021-08-01	VOC Delta GK (B.1.617.2+AY.*)	GK	AY.5	1	GK-AY.5	21J (Delta)
all	1205380	2021-10-01	VOC Delta GK (B.1.617.2+AY.*)	GK	AY.5	1	GK-AY.5	21J (Delta)
all	1205380	2021-11-01	VOC Delta GK (B.1.617.2+AY.*)	GK	AY.5	2	GK-AY.5	21J (Delta)
all	2840341	2021-12-01	VOC Delta GK (B.1.617.2+AY.*)	GK	AY.5	1	GK-AY.5	21J (Delta)
all	2319719	2021-08-01	VOC Delta GK (B.1.617.2+AY.*)	GK	AY.5	1	GK-AY.5	21J (Delta)
all	2319719	2021-10-01	VOC Delta GK (B.1.617.2+AY.*)	G	AY.5	1	G-AY.5	21J (Delta)
all	2319719	2021-10-01	VOC Delta GK (B.1.617.2+AY.*)	GK	AY.5	5	GK-AY.5	21J (Delta)
all	2319719	2021-11-01	VOC Delta GK (B.1.617.2+AY.*)	GK	AY.5	1	GK-AY.5	21J (Delta)
all	2319719	2021-12-01	VOC Delta GK (B.1.617.2+AY.*)	GK	AY.5	4	GK-AY.5	21J (Delta)
all	8419316	2021-06-01	VOC Delta GK (B.1.617.2+AY.*)	GK	AY.5	4	GK-AY.5	21J (Delta)
all	8419316	2021-07-01	VOC Delta GK (B.1.617.2+AY.*)	GK	AY.5	15	GK-AY.5	21J (Delta)
all	8419316	2021-07-01	VOC Delta GK (B.1.617.2+AY.*)	O	AY.5	1	O-AY.5	21J (Delta)
all	8419316	2021-08-01	VOC Delta GK (B.1.617.2+AY.*)	G	AY.5	2	G-AY.5	21J (Delta)
all	8419316	2021-08-01	VOC Delta GK (B.1.617.2+AY.*)	GK	AY.5	42	GK-AY.5	21J (Delta)
all	8419316	2021-09-01	VOC Delta GK (B.1.617.2+AY.*)	G	AY.5	3	G-AY.5	21J (Delta)
all	8419316	2021-09-01	VOC Delta GK (B.1.617.2+AY.*)	GK	AY.5	91	GK-AY.5	21J (Delta)
all	8419316	2021-10-01	VOC Delta GK (B.1.617.2+AY.*)	G	AY.5	2	G-AY.5	21J (Delta)
all	8419316	2021-10-01	VOC Delta GK (B.1.617.2+AY.*)	GK	AY.5	33	GK-AY.5	21J (Delta)
all	8419316	2021-11-01	VOC Delta GK (B.1.617.2+AY.*)	GK	AY.5	30	GK-AY.5	21J (Delta)
all	8419316	2021-12-01	VOC Delta GK (B.1.617.2+AY.*)	G	AY.5	1	G-AY.5	21J (Delta)
all	8419316	2021-12-01	VOC Delta GK (B.1.617.2+AY.*)	GK	AY.5	18	GK-AY.5	21J (Delta)
all	8419316	2021-12-01	VOC Delta GK (B.1.617.2+AY.*)	O	AY.5	1	O-AY.5	21J (Delta)
all	636657	2021-10-01	VOC Delta GK (B.1.617.2+AY.*)	G	AY.5	1	G-AY.5	21J (Delta)
all	636657	2021-10-01	VOC Delta GK (B.1.617.2+AY.*)	GK	AY.5	4	GK-AY.5	21J (Delta)
all	636657	2021-11-01	VOC Delta GK (B.1.617.2+AY.*)	GK	AY.5	1	GK-AY.5	21J (Delta)
all	636657	2021-12-01	VOC Delta GK (B.1.617.2+AY.*)	GK	AY.5	1	GK-AY.5	21J (Delta)
all	1382480	2021-07-01	VOC Delta GK (B.1.617.2+AY.*)	GK	AY.5	3	GK-AY.5	21J (Delta)
all	1382480	2021-09-01	VOC Delta GK (B.1.617.2+AY.*)	GK	AY.5	1	GK-AY.5	21J (Delta)
all	1382480	2021-11-01	VOC Delta GK (B.1.617.2+AY.*)	GK	AY.5	1	GK-AY.5	21J (Delta)
all	1382480	2021-12-01	VOC Delta GK (B.1.617.2+AY.*)	GK	AY.5	3	GK-AY.5	21J (Delta)
all	14570000	2021-07-01	VOC Delta GK (B.1.617.2+AY.*)	GK	AY.5	2	GK-AY.5	21J (Delta)
all	14570000	2021-08-01	VOC Delta GK (B.1.617.2+AY.*)	GK	AY.5	4	GK-AY.5	21J (Delta)
all	14570000	2021-12-01	VOC Delta GK (B.1.617.2+AY.*)	GK	AY.5	2	GK-AY.5	21J (Delta)
all	1083201	2021-10-01	VOC Delta GK (B.1.617.2+AY.*)	GK	AY.5.3	1	GK-AY.5.3	NA
all	2319719	2021-12-01	VOC Delta GK (B.1.617.2+AY.*)	GK	AY.5.3	1	GK-AY.5.3	NA
all	8419316	2021-07-01	VOC Delta GK (B.1.617.2+AY.*)	GK	AY.5.3	1	GK-AY.5.3	NA
all	8419316	2021-08-01	VOC Delta GK (B.1.617.2+AY.*)	GK	AY.5.3	1	GK-AY.5.3	NA
all	8419316	2021-09-01	VOC Delta GK (B.1.617.2+AY.*)	GK	AY.5.3	6	GK-AY.5.3	NA
all	8419316	2021-09-01	VOC Delta GK (B.1.617.2+AY.*)	GR	AY.5.3	1	GR-AY.5.3	NA
all	8419316	2021-10-01	VOC Delta GK (B.1.617.2+AY.*)	GK	AY.5.3	15	GK-AY.5.3	NA
all	8419316	2021-10-01	VOC Delta GK (B.1.617.2+AY.*)	GR	AY.5.3	6	GR-AY.5.3	NA
all	8419316	2021-11-01	VOC Delta GK (B.1.617.2+AY.*)	GK	AY.5.3	3	GK-AY.5.3	NA
all	8419316	2021-11-01	VOC Delta GK (B.1.617.2+AY.*)	GR	AY.5.3	3	GR-AY.5.3	NA
all	8419316	2021-12-01	VOC Delta GK (B.1.617.2+AY.*)	GK	AY.5.3	5	GK-AY.5.3	NA
all	14570000	2021-10-01	VOC Delta GK (B.1.617.2+AY.*)	GK	AY.5.3	6	GK-AY.5.3	NA
all	777706	2021-10-01	VOC Delta GK (B.1.617.2+AY.*)	GK	AY.51	2	GK-AY.51	NA
all	8419316	2021-08-01	VOC Delta GK (B.1.617.2+AY.*)	GK	AY.51	2	GK-AY.51	NA
all	8419316	2021-10-01	VOC Delta GK (B.1.617.2+AY.*)	GK	AY.51	2	GK-AY.51	NA
all	1083201	2021-09-01	VOC Delta GK (B.1.617.2+AY.*)	GK	AY.52	1	GK-AY.52	NA
all	8419316	2021-06-01	VOC Delta GK (B.1.617.2+AY.*)	GK	AY.52	1	GK-AY.52	NA
all	8419316	2021-06-01	VOC Delta GK (B.1.617.2+AY.*)	O	AY.52	1	O-AY.52	NA
all	8419316	2021-07-01	VOC Delta GK (B.1.617.2+AY.*)	GK	AY.52	1	GK-AY.52	NA
all	8419316	2021-08-01	VOC Delta GK (B.1.617.2+AY.*)	G	AY.52	1	G-AY.52	NA
all	8419316	2021-08-01	VOC Delta GK (B.1.617.2+AY.*)	GK	AY.52	3	GK-AY.52	NA
all	636657	2021-07-01	VOC Delta GK (B.1.617.2+AY.*)	GK	AY.52	1	GK-AY.52	NA
all	8419316	2021-07-01	VOC Delta GK (B.1.617.2+AY.*)	GK	AY.53	3	GK-AY.53	NA
all	1083201	2021-08-01	VOC Delta GK (B.1.617.2+AY.*)	GK	AY.54	4	GK-AY.54	21A (Delta)
all	1083201	2021-09-01	VOC Delta GK (B.1.617.2+AY.*)	G	AY.54	2	G-AY.54	21A (Delta)
all	1083201	2021-09-01	VOC Delta GK (B.1.617.2+AY.*)	GK	AY.54	5	GK-AY.54	21A (Delta)
all	1083201	2021-10-01	VOC Delta GK (B.1.617.2+AY.*)	G	AY.54	1	G-AY.54	21A (Delta)
all	1083201	2021-10-01	VOC Delta GK (B.1.617.2+AY.*)	GK	AY.54	1	GK-AY.54	21A (Delta)
all	1205380	2021-07-01	VOC Delta GK (B.1.617.2+AY.*)	GK	AY.54	6	GK-AY.54	21A (Delta)
all	1205380	2021-08-01	VOC Delta GK (B.1.617.2+AY.*)	GK	AY.54	11	GK-AY.54	21A (Delta)
all	1205380	2021-09-01	VOC Delta GK (B.1.617.2+AY.*)	GK	AY.54	3	GK-AY.54	21A (Delta)
all	2840341	2021-07-01	VOC Delta GK (B.1.617.2+AY.*)	GK	AY.54	1	GK-AY.54	21A (Delta)
all	2840341	2021-08-01	VOC Delta GK (B.1.617.2+AY.*)	GK	AY.54	3	GK-AY.54	21A (Delta)
all	2319719	2021-08-01	VOC Delta GK (B.1.617.2+AY.*)	GK	AY.54	1	GK-AY.54	21A (Delta)
all	2319719	2021-09-01	VOC Delta GK (B.1.617.2+AY.*)	G	AY.54	1	G-AY.54	21A (Delta)
all	2319719	2021-09-01	VOC Delta GK (B.1.617.2+AY.*)	GK	AY.54	1	GK-AY.54	21A (Delta)
all	486158	2021-08-01	VOC Delta GK (B.1.617.2+AY.*)	GK	AY.54	1	GK-AY.54	21A (Delta)
all	486158	2021-12-01	VOC Delta GK (B.1.617.2+AY.*)	GK	AY.54	1	GK-AY.54	21A (Delta)
all	8419316	2021-06-01	VOC Delta GK (B.1.617.2+AY.*)	GK	AY.54	1	GK-AY.54	21A (Delta)
all	8419316	2021-07-01	VOC Delta GK (B.1.617.2+AY.*)	GK	AY.54	47	GK-AY.54	21A (Delta)
all	8419316	2021-07-01	VOC Delta GK (B.1.617.2+AY.*)	O	AY.54	1	O-AY.54	21A (Delta)
all	8419316	2021-08-01	VOC Delta GK (B.1.617.2+AY.*)	G	AY.54	1	G-AY.54	21A (Delta)
all	8419316	2021-08-01	VOC Delta GK (B.1.617.2+AY.*)	GK	AY.54	66	GK-AY.54	21A (Delta)
all	8419316	2021-09-01	VOC Delta GK (B.1.617.2+AY.*)	G	AY.54	4	G-AY.54	21A (Delta)
all	8419316	2021-09-01	VOC Delta GK (B.1.617.2+AY.*)	GK	AY.54	43	GK-AY.54	21A (Delta)
all	8419316	2021-10-01	VOC Delta GK (B.1.617.2+AY.*)	G	AY.54	2	G-AY.54	21A (Delta)
all	8419316	2021-10-01	VOC Delta GK (B.1.617.2+AY.*)	GK	AY.54	10	GK-AY.54	21A (Delta)
all	8419316	2021-11-01	VOC Delta GK (B.1.617.2+AY.*)	GK	AY.54	9	GK-AY.54	21A (Delta)
all	8419316	2021-12-01	VOC Delta GK (B.1.617.2+AY.*)	GK	AY.54	2	GK-AY.54	21A (Delta)
all	636657	2021-12-01	VOC Delta GK (B.1.617.2+AY.*)	GK	AY.54	1	GK-AY.54	21A (Delta)
all	1382480	2021-07-01	VOC Delta GK (B.1.617.2+AY.*)	GK	AY.54	1	GK-AY.54	21A (Delta)
all	1382480	2021-08-01	VOC Delta GK (B.1.617.2+AY.*)	G	AY.54	1	G-AY.54	21A (Delta)
all	1382480	2021-08-01	VOC Delta GK (B.1.617.2+AY.*)	GK	AY.54	11	GK-AY.54	21A (Delta)
all	1382480	2021-09-01	VOC Delta GK (B.1.617.2+AY.*)	GK	AY.54	1	GK-AY.54	21A (Delta)
all	1382480	2021-10-01	VOC Delta GK (B.1.617.2+AY.*)	GK	AY.54	1	GK-AY.54	21A (Delta)
all	14570000	2021-07-01	VOC Delta GK (B.1.617.2+AY.*)	GK	AY.54	1	GK-AY.54	21A (Delta)
all	14570000	2021-08-01	VOC Delta GK (B.1.617.2+AY.*)	GK	AY.54	1	GK-AY.54	21A (Delta)
all	14570000	2021-09-01	VOC Delta GK (B.1.617.2+AY.*)	GK	AY.54	2	GK-AY.54	21A (Delta)
all	14570000	2021-11-01	VOC Delta GK (B.1.617.2+AY.*)	GK	AY.54	1	GK-AY.54	21A (Delta)
all	8419316	2021-05-01	VOC Delta GK (B.1.617.2+AY.*)	GK	AY.55	2	GK-AY.55	NA
all	14570000	2021-06-01	VOC Delta GK (B.1.617.2+AY.*)	GV	AY.55	2	GV-AY.55	NA
all	1083201	2021-07-01	VOC Delta GK (B.1.617.2+AY.*)	GV	AY.56	1	GV-AY.56	21A (Delta)
all	1083201	2021-08-01	VOC Delta GK (B.1.617.2+AY.*)	GK	AY.56	2	GK-AY.56	21A (Delta)
all	1083201	2021-08-01	VOC Delta GK (B.1.617.2+AY.*)	GV	AY.56	2	GV-AY.56	21A (Delta)
all	1083201	2021-09-01	VOC Delta GK (B.1.617.2+AY.*)	GV	AY.56	1	GV-AY.56	21A (Delta)
all	1083201	2021-11-01	VOC Delta GK (B.1.617.2+AY.*)	G	AY.56	1	G-AY.56	21A (Delta)
all	1083201	2021-11-01	VOC Delta GK (B.1.617.2+AY.*)	GK	AY.56	2	GK-AY.56	21A (Delta)
all	1083201	2021-12-01	VOC Delta GK (B.1.617.2+AY.*)	GK	AY.56	5	GK-AY.56	21A (Delta)
all	1205380	2021-06-01	VOC Delta GK (B.1.617.2+AY.*)	GK	AY.56	17	GK-AY.56	21A (Delta)
all	1205380	2021-07-01	VOC Delta GK (B.1.617.2+AY.*)	GK	AY.56	2	GK-AY.56	21A (Delta)
all	8419316	2021-06-01	VOC Delta GK (B.1.617.2+AY.*)	GK	AY.56	1	GK-AY.56	21A (Delta)
all	8419316	2021-07-01	VOC Delta GK (B.1.617.2+AY.*)	GK	AY.56	2	GK-AY.56	21A (Delta)
all	8419316	2021-08-01	VOC Delta GK (B.1.617.2+AY.*)	GK	AY.56	1	GK-AY.56	21A (Delta)
all	8419316	2021-09-01	VOC Delta GK (B.1.617.2+AY.*)	GK	AY.56	1	GK-AY.56	21A (Delta)
all	8419316	2021-11-01	VOC Delta GK (B.1.617.2+AY.*)	GK	AY.56	11	GK-AY.56	21A (Delta)
all	8419316	2021-12-01	VOC Delta GK (B.1.617.2+AY.*)	GK	AY.56	10	GK-AY.56	21A (Delta)
all	636657	2021-06-01	VOC Delta GK (B.1.617.2+AY.*)	GK	AY.56	1	GK-AY.56	21A (Delta)
all	1382480	2021-05-01	VOC Delta GK (B.1.617.2+AY.*)	GK	AY.56	1	GK-AY.56	21A (Delta)
all	8419316	2021-12-01	VOC Delta GK (B.1.617.2+AY.*)	GK	AY.57	1	GK-AY.57	21I (Delta)
all	8419316	2021-12-01	VOC Delta GK (B.1.617.2+AY.*)	GK	AY.57	1	GK-AY.57	21J (Delta)
all	14570000	2021-12-01	VOC Delta GK (B.1.617.2+AY.*)	GK	AY.57	1	GK-AY.57	21I (Delta)
all	14570000	2021-12-01	VOC Delta GK (B.1.617.2+AY.*)	GK	AY.57	1	GK-AY.57	21J (Delta)
all	8419316	2021-08-01	VOC Delta GK (B.1.617.2+AY.*)	GK	AY.59	4	GK-AY.59	NA
all	8419316	2021-09-01	VOC Delta GK (B.1.617.2+AY.*)	GK	AY.6	4	GK-AY.6	NA
all	8419316	2021-10-01	VOC Delta GK (B.1.617.2+AY.*)	GK	AY.6	3	GK-AY.6	NA
all	14570000	2021-07-01	VOC Delta GK (B.1.617.2+AY.*)	GK	AY.6	1	GK-AY.6	NA
all	14570000	2021-08-01	VOC Delta GK (B.1.617.2+AY.*)	G	AY.6	1	G-AY.6	NA
all	14570000	2021-11-01	VOC Delta GK (B.1.617.2+AY.*)	GK	AY.6	3	GK-AY.6	NA
all	777706	2021-07-01	VOC Delta GK (B.1.617.2+AY.*)	GK	AY.62	1	GK-AY.62	21A (Delta)
all	1205380	2021-08-01	VOC Delta GK (B.1.617.2+AY.*)	GK	AY.62	1	GK-AY.62	21A (Delta)
all	8419316	2021-07-01	VOC Delta GK (B.1.617.2+AY.*)	GK	AY.62	3	GK-AY.62	21A (Delta)
all	8419316	2021-08-01	VOC Delta GK (B.1.617.2+AY.*)	GK	AY.62	11	GK-AY.62	21A (Delta)
all	8419316	2021-08-01	VOC Delta GK (B.1.617.2+AY.*)	GV	AY.62	1	GV-AY.62	21A (Delta)
all	8419316	2021-09-01	VOC Delta GK (B.1.617.2+AY.*)	GK	AY.62	3	GK-AY.62	21A (Delta)
all	1382480	2021-08-01	VOC Delta GK (B.1.617.2+AY.*)	GK	AY.62	8	GK-AY.62	21A (Delta)
all	1382480	2021-09-01	VOC Delta GK (B.1.617.2+AY.*)	GK	AY.62	4	GK-AY.62	21A (Delta)
all	14570000	2021-08-01	VOC Delta GK (B.1.617.2+AY.*)	GK	AY.62	1	GK-AY.62	21A (Delta)
all	2840341	2021-11-01	VOC Delta GK (B.1.617.2+AY.*)	GK	AY.64	2	GK-AY.64	21A (Delta)
all	2319719	2021-10-01	VOC Delta GK (B.1.617.2+AY.*)	GV	AY.64	1	GV-AY.64	21A (Delta)
all	8419316	2021-07-01	VOC Delta GK (B.1.617.2+AY.*)	GK	AY.64	3	GK-AY.64	21A (Delta)
all	8419316	2021-08-01	VOC Delta GK (B.1.617.2+AY.*)	GK	AY.64	9	GK-AY.64	21A (Delta)
all	8419316	2021-09-01	VOC Delta GK (B.1.617.2+AY.*)	G	AY.64	1	G-AY.64	21A (Delta)
all	8419316	2021-09-01	VOC Delta GK (B.1.617.2+AY.*)	GK	AY.64	9	GK-AY.64	21A (Delta)
all	8419316	2021-09-01	VOC Delta GK (B.1.617.2+AY.*)	GV	AY.64	2	GV-AY.64	21A (Delta)
all	8419316	2021-10-01	VOC Delta GK (B.1.617.2+AY.*)	GK	AY.64	5	GK-AY.64	21A (Delta)
all	8419316	2021-10-01	VOC Delta GK (B.1.617.2+AY.*)	O	AY.64	1	O-AY.64	21A (Delta)
all	8419316	2021-11-01	VOC Delta GK (B.1.617.2+AY.*)	G	AY.64	1	G-AY.64	21A (Delta)
all	8419316	2021-11-01	VOC Delta GK (B.1.617.2+AY.*)	GK	AY.64	5	GK-AY.64	21A (Delta)
all	8419316	2021-11-01	VOC Delta GK (B.1.617.2+AY.*)	GV	AY.64	1	GV-AY.64	21A (Delta)
all	8419316	2021-12-01	VOC Delta GK (B.1.617.2+AY.*)	GK	AY.64	5	GK-AY.64	21A (Delta)
all	1382480	2021-08-01	VOC Delta GK (B.1.617.2+AY.*)	GK	AY.64	1	GK-AY.64	21A (Delta)
all	14570000	2021-04-01	VOC Delta GK (B.1.617.2+AY.*)	GK	AY.64	1	GK-AY.64	21A (Delta)
all	14570000	2021-05-01	VOC Delta GK (B.1.617.2+AY.*)	GK	AY.64	17	GK-AY.64	21A (Delta)
all	14570000	2021-05-01	VOC Delta GK (B.1.617.2+AY.*)	GV	AY.64	1	GV-AY.64	21A (Delta)
all	14570000	2021-06-01	VOC Delta GK (B.1.617.2+AY.*)	GK	AY.64	7	GK-AY.64	21A (Delta)
all	1205380	2021-09-01	VOC Delta GK (B.1.617.2+AY.*)	GK	AY.65	1	GK-AY.65	21I (Delta)
all	8419316	2021-08-01	VOC Delta GK (B.1.617.2+AY.*)	GK	AY.65	4	GK-AY.65	21I (Delta)
all	8419316	2021-09-01	VOC Delta GK (B.1.617.2+AY.*)	GK	AY.65	2	GK-AY.65	21I (Delta)
all	8419316	2021-11-01	VOC Delta GK (B.1.617.2+AY.*)	G	AY.65	1	G-AY.65	21I (Delta)
all	8419316	2021-11-01	VOC Delta GK (B.1.617.2+AY.*)	GV	AY.65	1	GV-AY.65	21I (Delta)
all	8419316	2021-12-01	VOC Delta GK (B.1.617.2+AY.*)	GK	AY.65	1	GK-AY.65	21I (Delta)
all	8419316	2021-12-01	VOC Delta GK (B.1.617.2+AY.*)	GV	AY.65	1	GV-AY.65	21I (Delta)
all	14570000	2021-06-01	VOC Delta GK (B.1.617.2+AY.*)	GK	AY.65	1	GK-AY.65	21I (Delta)
all	14570000	2021-08-01	VOC Delta GK (B.1.617.2+AY.*)	GK	AY.65	2	GK-AY.65	21I (Delta)
all	14570000	2021-12-01	VOC Delta GK (B.1.617.2+AY.*)	GK	AY.65	1	GK-AY.65	21I (Delta)
all	1205380	2021-07-01	VOC Delta GK (B.1.617.2+AY.*)	GK	AY.67	1	GK-AY.67	NA
all	8419316	2021-07-01	VOC Delta GK (B.1.617.2+AY.*)	GK	AY.67	3	GK-AY.67	NA
all	8419316	2021-08-01	VOC Delta GK (B.1.617.2+AY.*)	GK	AY.67	7	GK-AY.67	NA
all	8419316	2021-08-01	VOC Delta GK (B.1.617.2+AY.*)	GV	AY.67	2	GV-AY.67	NA
all	8419316	2021-09-01	VOC Delta GK (B.1.617.2+AY.*)	GK	AY.67	4	GK-AY.67	NA
all	14570000	2021-08-01	VOC Delta GK (B.1.617.2+AY.*)	GK	AY.7	1	GK-AY.7	NA
all	2319719	2021-10-01	VOC Delta GK (B.1.617.2+AY.*)	GK	AY.7.1	2	GK-AY.7.1	NA
all	8419316	2021-08-01	VOC Delta GK (B.1.617.2+AY.*)	GK	AY.7.1	2	GK-AY.7.1	NA
all	8419316	2021-09-01	VOC Delta GK (B.1.617.2+AY.*)	GK	AY.7.1	1	GK-AY.7.1	NA
all	8419316	2021-10-01	VOC Delta GK (B.1.617.2+AY.*)	GK	AY.7.1	1	GK-AY.7.1	NA
all	8419316	2021-11-01	VOC Delta GK (B.1.617.2+AY.*)	GK	AY.7.1	6	GK-AY.7.1	NA
all	2840341	2021-09-01	VOC Delta GK (B.1.617.2+AY.*)	GK	AY.7.2	1	GK-AY.7.2	NA
all	1205380	2021-08-01	VOC Delta GK (B.1.617.2+AY.*)	GK	AY.70	2	GK-AY.70	NA
all	2840341	2021-08-01	VOC Delta GK (B.1.617.2+AY.*)	GK	AY.70	1	GK-AY.70	NA
all	8419316	2021-07-01	VOC Delta GK (B.1.617.2+AY.*)	GK	AY.70	1	GK-AY.70	NA
all	8419316	2021-09-01	VOC Delta GK (B.1.617.2+AY.*)	GK	AY.70	2	GK-AY.70	NA
all	14570000	2021-05-01	VOC Delta GK (B.1.617.2+AY.*)	GK	AY.70	7	GK-AY.70	NA
all	14570000	2021-06-01	VOC Delta GK (B.1.617.2+AY.*)	GK	AY.70	8	GK-AY.70	NA
all	14570000	2021-07-01	VOC Delta GK (B.1.617.2+AY.*)	GK	AY.70	1	GK-AY.70	NA
all	14570000	2021-08-01	VOC Delta GK (B.1.617.2+AY.*)	GK	AY.70	4	GK-AY.70	NA
all	8419316	2021-09-01	VOC Delta GK (B.1.617.2+AY.*)	GK	AY.72	2	GK-AY.72	NA
all	14570000	2021-09-01	VOC Delta GK (B.1.617.2+AY.*)	GK	AY.72	2	GK-AY.72	NA
all	8419316	2021-08-01	VOC Delta GK (B.1.617.2+AY.*)	GK	AY.73	3	GK-AY.73	NA
all	14570000	2021-08-01	VOC Delta GK (B.1.617.2+AY.*)	GK	AY.73	2	GK-AY.73	NA
all	1083201	2021-08-01	VOC Delta GK (B.1.617.2+AY.*)	GK	AY.75	1	GK-AY.75	21I (Delta)
all	1083201	2021-08-01	VOC Delta GK (B.1.617.2+AY.*)	GK	AY.75	1	GK-AY.75	21A (Delta)
all	1083201	2021-08-01	VOC Delta GK (B.1.617.2+AY.*)	GV	AY.75	1	GV-AY.75	21I (Delta)
all	1083201	2021-08-01	VOC Delta GK (B.1.617.2+AY.*)	GV	AY.75	1	GV-AY.75	21A (Delta)
all	1083201	2021-09-01	VOC Delta GK (B.1.617.2+AY.*)	GK	AY.75	3	GK-AY.75	21I (Delta)
all	1083201	2021-09-01	VOC Delta GK (B.1.617.2+AY.*)	GK	AY.75	3	GK-AY.75	21A (Delta)
all	1083201	2021-09-01	VOC Delta GK (B.1.617.2+AY.*)	GV	AY.75	1	GV-AY.75	21I (Delta)
all	1083201	2021-09-01	VOC Delta GK (B.1.617.2+AY.*)	GV	AY.75	1	GV-AY.75	21A (Delta)
all	1083201	2021-10-01	VOC Delta GK (B.1.617.2+AY.*)	GK	AY.75	3	GK-AY.75	21I (Delta)
all	1083201	2021-10-01	VOC Delta GK (B.1.617.2+AY.*)	GK	AY.75	3	GK-AY.75	21A (Delta)
all	1083201	2021-10-01	VOC Delta GK (B.1.617.2+AY.*)	GV	AY.75	6	GV-AY.75	21I (Delta)
all	1083201	2021-10-01	VOC Delta GK (B.1.617.2+AY.*)	GV	AY.75	6	GV-AY.75	21A (Delta)
all	1083201	2021-11-01	VOC Delta GK (B.1.617.2+AY.*)	GK	AY.75	3	GK-AY.75	21I (Delta)
all	1083201	2021-11-01	VOC Delta GK (B.1.617.2+AY.*)	GK	AY.75	3	GK-AY.75	21A (Delta)
all	1083201	2021-12-01	VOC Delta GK (B.1.617.2+AY.*)	GK	AY.75	2	GK-AY.75	21I (Delta)
all	1083201	2021-12-01	VOC Delta GK (B.1.617.2+AY.*)	GK	AY.75	2	GK-AY.75	21A (Delta)
all	777706	2021-08-01	VOC Delta GK (B.1.617.2+AY.*)	GK	AY.75	2	GK-AY.75	21I (Delta)
all	777706	2021-08-01	VOC Delta GK (B.1.617.2+AY.*)	GK	AY.75	2	GK-AY.75	21A (Delta)
all	777706	2021-09-01	VOC Delta GK (B.1.617.2+AY.*)	GK	AY.75	7	GK-AY.75	21I (Delta)
all	777706	2021-09-01	VOC Delta GK (B.1.617.2+AY.*)	GK	AY.75	7	GK-AY.75	21A (Delta)
all	777706	2021-10-01	VOC Delta GK (B.1.617.2+AY.*)	GK	AY.75	1	GK-AY.75	21I (Delta)
all	777706	2021-10-01	VOC Delta GK (B.1.617.2+AY.*)	GK	AY.75	1	GK-AY.75	21A (Delta)
all	777706	2021-10-01	VOC Delta GK (B.1.617.2+AY.*)	GV	AY.75	2	GV-AY.75	21I (Delta)
all	777706	2021-10-01	VOC Delta GK (B.1.617.2+AY.*)	GV	AY.75	2	GV-AY.75	21A (Delta)
all	777706	2021-11-01	VOC Delta GK (B.1.617.2+AY.*)	GK	AY.75	5	GK-AY.75	21I (Delta)
all	777706	2021-11-01	VOC Delta GK (B.1.617.2+AY.*)	GK	AY.75	5	GK-AY.75	21A (Delta)
all	777706	2021-12-01	VOC Delta GK (B.1.617.2+AY.*)	GK	AY.75	2	GK-AY.75	21I (Delta)
all	777706	2021-12-01	VOC Delta GK (B.1.617.2+AY.*)	GK	AY.75	2	GK-AY.75	21A (Delta)
all	1205380	2021-05-01	VOC Delta GK (B.1.617.2+AY.*)	GK	AY.75	2	GK-AY.75	21I (Delta)
all	1205380	2021-05-01	VOC Delta GK (B.1.617.2+AY.*)	GK	AY.75	2	GK-AY.75	21A (Delta)
all	1205380	2021-06-01	VOC Delta GK (B.1.617.2+AY.*)	GK	AY.75	8	GK-AY.75	21I (Delta)
all	1205380	2021-06-01	VOC Delta GK (B.1.617.2+AY.*)	GK	AY.75	8	GK-AY.75	21A (Delta)
all	1205380	2021-06-01	VOC Delta GK (B.1.617.2+AY.*)	GV	AY.75	1	GV-AY.75	21I (Delta)
all	1205380	2021-06-01	VOC Delta GK (B.1.617.2+AY.*)	GV	AY.75	1	GV-AY.75	21A (Delta)
all	1205380	2021-07-01	VOC Delta GK (B.1.617.2+AY.*)	GK	AY.75	5	GK-AY.75	21I (Delta)
all	1205380	2021-07-01	VOC Delta GK (B.1.617.2+AY.*)	GK	AY.75	5	GK-AY.75	21A (Delta)
all	1205380	2021-08-01	VOC Delta GK (B.1.617.2+AY.*)	GK	AY.75	11	GK-AY.75	21I (Delta)
all	1205380	2021-08-01	VOC Delta GK (B.1.617.2+AY.*)	GK	AY.75	11	GK-AY.75	21A (Delta)
all	1205380	2021-08-01	VOC Delta GK (B.1.617.2+AY.*)	GV	AY.75	1	GV-AY.75	21I (Delta)
all	1205380	2021-08-01	VOC Delta GK (B.1.617.2+AY.*)	GV	AY.75	1	GV-AY.75	21A (Delta)
all	1205380	2021-09-01	VOC Delta GK (B.1.617.2+AY.*)	GK	AY.75	18	GK-AY.75	21I (Delta)
all	1205380	2021-09-01	VOC Delta GK (B.1.617.2+AY.*)	GK	AY.75	18	GK-AY.75	21A (Delta)
all	1205380	2021-10-01	VOC Delta GK (B.1.617.2+AY.*)	GK	AY.75	5	GK-AY.75	21I (Delta)
all	1205380	2021-10-01	VOC Delta GK (B.1.617.2+AY.*)	GK	AY.75	5	GK-AY.75	21A (Delta)
all	2840341	2021-06-01	VOC Delta GK (B.1.617.2+AY.*)	GK	AY.75	2	GK-AY.75	21I (Delta)
all	2840341	2021-06-01	VOC Delta GK (B.1.617.2+AY.*)	GK	AY.75	2	GK-AY.75	21A (Delta)
all	2840341	2021-07-01	VOC Delta GK (B.1.617.2+AY.*)	GH	AY.75	1	GH-AY.75	21I (Delta)
all	2840341	2021-07-01	VOC Delta GK (B.1.617.2+AY.*)	GH	AY.75	1	GH-AY.75	21A (Delta)
all	2840341	2021-07-01	VOC Delta GK (B.1.617.2+AY.*)	GK	AY.75	6	GK-AY.75	21I (Delta)
all	2840341	2021-07-01	VOC Delta GK (B.1.617.2+AY.*)	GK	AY.75	6	GK-AY.75	21A (Delta)
all	2840341	2021-07-01	VOC Delta GK (B.1.617.2+AY.*)	GV	AY.75	1	GV-AY.75	21I (Delta)
all	2840341	2021-07-01	VOC Delta GK (B.1.617.2+AY.*)	GV	AY.75	1	GV-AY.75	21A (Delta)
all	2840341	2021-08-01	VOC Delta GK (B.1.617.2+AY.*)	GK	AY.75	4	GK-AY.75	21I (Delta)
all	2840341	2021-08-01	VOC Delta GK (B.1.617.2+AY.*)	GK	AY.75	4	GK-AY.75	21A (Delta)
all	2840341	2021-09-01	VOC Delta GK (B.1.617.2+AY.*)	GK	AY.75	2	GK-AY.75	21I (Delta)
all	2840341	2021-09-01	VOC Delta GK (B.1.617.2+AY.*)	GK	AY.75	2	GK-AY.75	21A (Delta)
all	2319719	2021-07-01	VOC Delta GK (B.1.617.2+AY.*)	GK	AY.75	1	GK-AY.75	21I (Delta)
all	2319719	2021-07-01	VOC Delta GK (B.1.617.2+AY.*)	GK	AY.75	1	GK-AY.75	21A (Delta)
all	2319719	2021-08-01	VOC Delta GK (B.1.617.2+AY.*)	GK	AY.75	7	GK-AY.75	21I (Delta)
all	2319719	2021-08-01	VOC Delta GK (B.1.617.2+AY.*)	GK	AY.75	7	GK-AY.75	21A (Delta)
all	2319719	2021-08-01	VOC Delta GK (B.1.617.2+AY.*)	GV	AY.75	3	GV-AY.75	21I (Delta)
all	2319719	2021-08-01	VOC Delta GK (B.1.617.2+AY.*)	GV	AY.75	3	GV-AY.75	21A (Delta)
all	2319719	2021-09-01	VOC Delta GK (B.1.617.2+AY.*)	GK	AY.75	1	GK-AY.75	21I (Delta)
all	2319719	2021-09-01	VOC Delta GK (B.1.617.2+AY.*)	GK	AY.75	1	GK-AY.75	21A (Delta)
all	2319719	2021-09-01	VOC Delta GK (B.1.617.2+AY.*)	GV	AY.75	1	GV-AY.75	21I (Delta)
all	2319719	2021-09-01	VOC Delta GK (B.1.617.2+AY.*)	GV	AY.75	1	GV-AY.75	21A (Delta)
all	2319719	2021-10-01	VOC Delta GK (B.1.617.2+AY.*)	GK	AY.75	8	GK-AY.75	21I (Delta)
all	2319719	2021-10-01	VOC Delta GK (B.1.617.2+AY.*)	GK	AY.75	8	GK-AY.75	21A (Delta)
all	2319719	2021-10-01	VOC Delta GK (B.1.617.2+AY.*)	GV	AY.75	1	GV-AY.75	21I (Delta)
all	2319719	2021-10-01	VOC Delta GK (B.1.617.2+AY.*)	GV	AY.75	1	GV-AY.75	21A (Delta)
all	2319719	2021-11-01	VOC Delta GK (B.1.617.2+AY.*)	GK	AY.75	6	GK-AY.75	21I (Delta)
all	2319719	2021-11-01	VOC Delta GK (B.1.617.2+AY.*)	GK	AY.75	6	GK-AY.75	21A (Delta)
all	486158	2021-08-01	VOC Delta GK (B.1.617.2+AY.*)	GK	AY.75	1	GK-AY.75	21I (Delta)
all	486158	2021-08-01	VOC Delta GK (B.1.617.2+AY.*)	GK	AY.75	1	GK-AY.75	21A (Delta)
all	8419316	2021-04-01	VOC Delta GK (B.1.617.2+AY.*)	GK	AY.75	2	GK-AY.75	21I (Delta)
all	8419316	2021-04-01	VOC Delta GK (B.1.617.2+AY.*)	GK	AY.75	2	GK-AY.75	21A (Delta)
all	8419316	2021-05-01	VOC Delta GK (B.1.617.2+AY.*)	GK	AY.75	5	GK-AY.75	21I (Delta)
all	8419316	2021-05-01	VOC Delta GK (B.1.617.2+AY.*)	GK	AY.75	5	GK-AY.75	21A (Delta)
all	8419316	2021-05-01	VOC Delta GK (B.1.617.2+AY.*)	GV	AY.75	3	GV-AY.75	21I (Delta)
all	8419316	2021-05-01	VOC Delta GK (B.1.617.2+AY.*)	GV	AY.75	3	GV-AY.75	21A (Delta)
all	8419316	2021-06-01	VOC Delta GK (B.1.617.2+AY.*)	G	AY.75	1	G-AY.75	21I (Delta)
all	8419316	2021-06-01	VOC Delta GK (B.1.617.2+AY.*)	G	AY.75	1	G-AY.75	21A (Delta)
all	8419316	2021-06-01	VOC Delta GK (B.1.617.2+AY.*)	GK	AY.75	53	GK-AY.75	21I (Delta)
all	8419316	2021-06-01	VOC Delta GK (B.1.617.2+AY.*)	GK	AY.75	53	GK-AY.75	21A (Delta)
all	8419316	2021-06-01	VOC Delta GK (B.1.617.2+AY.*)	GV	AY.75	1	GV-AY.75	21I (Delta)
all	8419316	2021-06-01	VOC Delta GK (B.1.617.2+AY.*)	GV	AY.75	1	GV-AY.75	21A (Delta)
all	8419316	2021-07-01	VOC Delta GK (B.1.617.2+AY.*)	G	AY.75	2	G-AY.75	21I (Delta)
all	8419316	2021-07-01	VOC Delta GK (B.1.617.2+AY.*)	G	AY.75	2	G-AY.75	21A (Delta)
all	8419316	2021-07-01	VOC Delta GK (B.1.617.2+AY.*)	GK	AY.75	118	GK-AY.75	21I (Delta)
all	8419316	2021-07-01	VOC Delta GK (B.1.617.2+AY.*)	GK	AY.75	118	GK-AY.75	21A (Delta)
all	8419316	2021-07-01	VOC Delta GK (B.1.617.2+AY.*)	GV	AY.75	3	GV-AY.75	21I (Delta)
all	8419316	2021-07-01	VOC Delta GK (B.1.617.2+AY.*)	GV	AY.75	3	GV-AY.75	21A (Delta)
all	8419316	2021-08-01	VOC Delta GK (B.1.617.2+AY.*)	G	AY.75	1	G-AY.75	21I (Delta)
all	8419316	2021-08-01	VOC Delta GK (B.1.617.2+AY.*)	G	AY.75	1	G-AY.75	21A (Delta)
all	8419316	2021-08-01	VOC Delta GK (B.1.617.2+AY.*)	GK	AY.75	217	GK-AY.75	21I (Delta)
all	8419316	2021-08-01	VOC Delta GK (B.1.617.2+AY.*)	GK	AY.75	217	GK-AY.75	21A (Delta)
all	8419316	2021-08-01	VOC Delta GK (B.1.617.2+AY.*)	GV	AY.75	9	GV-AY.75	21I (Delta)
all	8419316	2021-08-01	VOC Delta GK (B.1.617.2+AY.*)	GV	AY.75	9	GV-AY.75	21A (Delta)
all	8419316	2021-08-01	VOC Delta GK (B.1.617.2+AY.*)	O	AY.75	2	O-AY.75	21I (Delta)
all	8419316	2021-08-01	VOC Delta GK (B.1.617.2+AY.*)	O	AY.75	2	O-AY.75	21A (Delta)
all	8419316	2021-09-01	VOC Delta GK (B.1.617.2+AY.*)	G	AY.75	3	G-AY.75	21I (Delta)
all	8419316	2021-09-01	VOC Delta GK (B.1.617.2+AY.*)	G	AY.75	3	G-AY.75	21A (Delta)
all	8419316	2021-09-01	VOC Delta GK (B.1.617.2+AY.*)	GK	AY.75	108	GK-AY.75	21I (Delta)
all	8419316	2021-09-01	VOC Delta GK (B.1.617.2+AY.*)	GK	AY.75	108	GK-AY.75	21A (Delta)
all	8419316	2021-09-01	VOC Delta GK (B.1.617.2+AY.*)	GV	AY.75	4	GV-AY.75	21I (Delta)
all	8419316	2021-09-01	VOC Delta GK (B.1.617.2+AY.*)	GV	AY.75	4	GV-AY.75	21A (Delta)
all	8419316	2021-10-01	VOC Delta GK (B.1.617.2+AY.*)	G	AY.75	1	G-AY.75	21I (Delta)
all	8419316	2021-10-01	VOC Delta GK (B.1.617.2+AY.*)	G	AY.75	1	G-AY.75	21A (Delta)
all	8419316	2021-10-01	VOC Delta GK (B.1.617.2+AY.*)	GK	AY.75	77	GK-AY.75	21I (Delta)
all	8419316	2021-10-01	VOC Delta GK (B.1.617.2+AY.*)	GK	AY.75	77	GK-AY.75	21A (Delta)
all	8419316	2021-10-01	VOC Delta GK (B.1.617.2+AY.*)	GV	AY.75	3	GV-AY.75	21I (Delta)
all	8419316	2021-10-01	VOC Delta GK (B.1.617.2+AY.*)	GV	AY.75	3	GV-AY.75	21A (Delta)
all	8419316	2021-11-01	VOC Delta GK (B.1.617.2+AY.*)	GK	AY.75	53	GK-AY.75	21I (Delta)
all	8419316	2021-11-01	VOC Delta GK (B.1.617.2+AY.*)	GK	AY.75	53	GK-AY.75	21A (Delta)
all	8419316	2021-11-01	VOC Delta GK (B.1.617.2+AY.*)	GV	AY.75	2	GV-AY.75	21I (Delta)
all	8419316	2021-11-01	VOC Delta GK (B.1.617.2+AY.*)	GV	AY.75	2	GV-AY.75	21A (Delta)
all	8419316	2021-11-01	VOC Delta GK (B.1.617.2+AY.*)	O	AY.75	2	O-AY.75	21I (Delta)
all	8419316	2021-11-01	VOC Delta GK (B.1.617.2+AY.*)	O	AY.75	2	O-AY.75	21A (Delta)
all	8419316	2021-12-01	VOC Delta GK (B.1.617.2+AY.*)	GK	AY.75	47	GK-AY.75	21I (Delta)
all	8419316	2021-12-01	VOC Delta GK (B.1.617.2+AY.*)	GK	AY.75	47	GK-AY.75	21A (Delta)
all	8419316	2021-12-01	VOC Delta GK (B.1.617.2+AY.*)	GV	AY.75	3	GV-AY.75	21I (Delta)
all	8419316	2021-12-01	VOC Delta GK (B.1.617.2+AY.*)	GV	AY.75	3	GV-AY.75	21A (Delta)
all	636657	2021-09-01	VOC Delta GK (B.1.617.2+AY.*)	GK	AY.75	2	GK-AY.75	21I (Delta)
all	636657	2021-09-01	VOC Delta GK (B.1.617.2+AY.*)	GK	AY.75	2	GK-AY.75	21A (Delta)
all	1382480	2021-07-01	VOC Delta GK (B.1.617.2+AY.*)	GK	AY.75	3	GK-AY.75	21I (Delta)
all	1382480	2021-07-01	VOC Delta GK (B.1.617.2+AY.*)	GK	AY.75	3	GK-AY.75	21A (Delta)
all	1382480	2021-08-01	VOC Delta GK (B.1.617.2+AY.*)	GK	AY.75	15	GK-AY.75	21I (Delta)
all	1382480	2021-08-01	VOC Delta GK (B.1.617.2+AY.*)	GK	AY.75	15	GK-AY.75	21A (Delta)
all	1382480	2021-09-01	VOC Delta GK (B.1.617.2+AY.*)	GK	AY.75	9	GK-AY.75	21I (Delta)
all	1382480	2021-09-01	VOC Delta GK (B.1.617.2+AY.*)	GK	AY.75	9	GK-AY.75	21A (Delta)
all	1382480	2021-10-01	VOC Delta GK (B.1.617.2+AY.*)	GK	AY.75	25	GK-AY.75	21I (Delta)
all	1382480	2021-10-01	VOC Delta GK (B.1.617.2+AY.*)	GK	AY.75	25	GK-AY.75	21A (Delta)
all	1382480	2021-10-01	VOC Delta GK (B.1.617.2+AY.*)	GV	AY.75	2	GV-AY.75	21I (Delta)
all	1382480	2021-10-01	VOC Delta GK (B.1.617.2+AY.*)	GV	AY.75	2	GV-AY.75	21A (Delta)
all	1382480	2021-11-01	VOC Delta GK (B.1.617.2+AY.*)	GK	AY.75	13	GK-AY.75	21I (Delta)
all	1382480	2021-11-01	VOC Delta GK (B.1.617.2+AY.*)	GK	AY.75	13	GK-AY.75	21A (Delta)
all	1382480	2021-12-01	VOC Delta GK (B.1.617.2+AY.*)	GK	AY.75	4	GK-AY.75	21I (Delta)
all	1382480	2021-12-01	VOC Delta GK (B.1.617.2+AY.*)	GK	AY.75	4	GK-AY.75	21A (Delta)
all	14570000	2021-05-01	VOC Delta GK (B.1.617.2+AY.*)	GK	AY.75	3	GK-AY.75	21I (Delta)
all	14570000	2021-05-01	VOC Delta GK (B.1.617.2+AY.*)	GK	AY.75	3	GK-AY.75	21A (Delta)
all	14570000	2021-05-01	VOC Delta GK (B.1.617.2+AY.*)	GV	AY.75	1	GV-AY.75	21I (Delta)
all	14570000	2021-05-01	VOC Delta GK (B.1.617.2+AY.*)	GV	AY.75	1	GV-AY.75	21A (Delta)
all	14570000	2021-06-01	VOC Delta GK (B.1.617.2+AY.*)	GK	AY.75	1	GK-AY.75	21I (Delta)
all	14570000	2021-06-01	VOC Delta GK (B.1.617.2+AY.*)	GK	AY.75	1	GK-AY.75	21A (Delta)
all	14570000	2021-07-01	VOC Delta GK (B.1.617.2+AY.*)	GK	AY.75	4	GK-AY.75	21I (Delta)
all	14570000	2021-07-01	VOC Delta GK (B.1.617.2+AY.*)	GK	AY.75	4	GK-AY.75	21A (Delta)
all	14570000	2021-08-01	VOC Delta GK (B.1.617.2+AY.*)	GK	AY.75	6	GK-AY.75	21I (Delta)
all	14570000	2021-08-01	VOC Delta GK (B.1.617.2+AY.*)	GK	AY.75	6	GK-AY.75	21A (Delta)
all	14570000	2021-09-01	VOC Delta GK (B.1.617.2+AY.*)	GK	AY.75	2	GK-AY.75	21I (Delta)
all	14570000	2021-09-01	VOC Delta GK (B.1.617.2+AY.*)	GK	AY.75	2	GK-AY.75	21A (Delta)
all	14570000	2021-11-01	VOC Delta GK (B.1.617.2+AY.*)	GK	AY.75	25	GK-AY.75	21I (Delta)
all	14570000	2021-11-01	VOC Delta GK (B.1.617.2+AY.*)	GK	AY.75	25	GK-AY.75	21A (Delta)
all	14570000	2021-12-01	VOC Delta GK (B.1.617.2+AY.*)	GK	AY.75	108	GK-AY.75	21I (Delta)
all	14570000	2021-12-01	VOC Delta GK (B.1.617.2+AY.*)	GK	AY.75	108	GK-AY.75	21A (Delta)
all	14570000	2021-12-01	VOC Delta GK (B.1.617.2+AY.*)	GV	AY.75	1	GV-AY.75	21I (Delta)
all	14570000	2021-12-01	VOC Delta GK (B.1.617.2+AY.*)	GV	AY.75	1	GV-AY.75	21A (Delta)
all	1205380	2021-08-01	VOC Delta GK (B.1.617.2+AY.*)	GK	AY.77	1	GK-AY.77	NA
all	1205380	2021-09-01	VOC Delta GK (B.1.617.2+AY.*)	GK	AY.77	1	GK-AY.77	NA
all	8419316	2021-07-01	VOC Delta GK (B.1.617.2+AY.*)	GK	AY.77	3	GK-AY.77	NA
all	8419316	2021-08-01	VOC Delta GK (B.1.617.2+AY.*)	GK	AY.77	9	GK-AY.77	NA
all	8419316	2021-11-01	VOC Delta GK (B.1.617.2+AY.*)	GK	AY.77	1	GK-AY.77	NA
all	14570000	2021-08-01	VOC Delta GK (B.1.617.2+AY.*)	GK	AY.77	1	GK-AY.77	NA
all	14570000	2021-12-01	VOC Delta GK (B.1.617.2+AY.*)	GK	AY.77	5	GK-AY.77	NA
all	8419316	2021-07-01	VOC Delta GK (B.1.617.2+AY.*)	GK	AY.78	8	GK-AY.78	21J (Delta)
all	1205380	2021-08-01	VOC Delta GK (B.1.617.2+AY.*)	GK	AY.79	1	GK-AY.79	21J (Delta)
all	8419316	2021-12-01	VOC Delta GK (B.1.617.2+AY.*)	GK	AY.80	1	GK-AY.80	NA
all	14570000	2021-09-01	VOC Delta GK (B.1.617.2+AY.*)	G	AY.80	1	G-AY.80	NA
all	8419316	2021-07-01	VOC Delta GK (B.1.617.2+AY.*)	GK	AY.81	1	GK-AY.81	NA
all	8419316	2021-11-01	VOC Delta GK (B.1.617.2+AY.*)	GK	AY.81	1	GK-AY.81	NA
all	14570000	2021-08-01	VOC Delta GK (B.1.617.2+AY.*)	GK	AY.82	2	GK-AY.82	NA
all	8419316	2021-06-01	VOC Delta GK (B.1.617.2+AY.*)	GK	AY.83	1	GK-AY.83	NA
all	8419316	2021-07-01	VOC Delta GK (B.1.617.2+AY.*)	G	AY.83	1	G-AY.83	NA
all	8419316	2021-07-01	VOC Delta GK (B.1.617.2+AY.*)	GK	AY.83	1	GK-AY.83	NA
all	14570000	2021-11-01	VOC Delta GK (B.1.617.2+AY.*)	GK	AY.83	1	GK-AY.83	NA
all	14570000	2021-12-01	VOC Delta GK (B.1.617.2+AY.*)	GK	AY.83	1	GK-AY.83	NA
all	8419316	2021-09-01	VOC Delta GK (B.1.617.2+AY.*)	G	AY.84	1	G-AY.84	NA
all	8419316	2021-09-01	VOC Delta GK (B.1.617.2+AY.*)	GK	AY.84	1	GK-AY.84	NA
all	8419316	2021-10-01	VOC Delta GK (B.1.617.2+AY.*)	GK	AY.84	2	GK-AY.84	NA
all	14570000	2021-05-01	VOC Delta GK (B.1.617.2+AY.*)	GK	AY.86	9	GK-AY.86	NA
all	14570000	2021-06-01	VOC Delta GK (B.1.617.2+AY.*)	GK	AY.86	3	GK-AY.86	NA
all	14570000	2021-07-01	VOC Delta GK (B.1.617.2+AY.*)	GK	AY.86	1	GK-AY.86	NA
all	14570000	2021-08-01	VOC Delta GK (B.1.617.2+AY.*)	GK	AY.86	2	GK-AY.86	NA
all	14570000	2021-11-01	VOC Delta GK (B.1.617.2+AY.*)	GK	AY.86	17	GK-AY.86	NA
all	14570000	2021-12-01	VOC Delta GK (B.1.617.2+AY.*)	GK	AY.86	95	GK-AY.86	NA
all	1205380	2021-07-01	VOC Delta GK (B.1.617.2+AY.*)	GK	AY.87	1	GK-AY.87	21J (Delta)
all	8419316	2021-11-01	VOC Delta GK (B.1.617.2+AY.*)	GK	AY.87	1	GK-AY.87	21J (Delta)
all	8419316	2021-12-01	VOC Delta GK (B.1.617.2+AY.*)	GK	AY.87	2	GK-AY.87	21J (Delta)
all	2319719	2021-08-01	VOC Delta GK (B.1.617.2+AY.*)	G	AY.88	1	G-AY.88	NA
all	2319719	2021-08-01	VOC Delta GK (B.1.617.2+AY.*)	GK	AY.88	1	GK-AY.88	NA
all	8419316	2021-08-01	VOC Delta GK (B.1.617.2+AY.*)	G	AY.88	1	G-AY.88	NA
all	8419316	2021-08-01	VOC Delta GK (B.1.617.2+AY.*)	GK	AY.88	7	GK-AY.88	NA
all	8419316	2021-09-01	VOC Delta GK (B.1.617.2+AY.*)	GK	AY.88	11	GK-AY.88	NA
all	8419316	2021-11-01	VOC Delta GK (B.1.617.2+AY.*)	GK	AY.88	3	GK-AY.88	NA
all	14570000	2021-07-01	VOC Delta GK (B.1.617.2+AY.*)	G	AY.88	1	G-AY.88	NA
all	2319719	2021-08-01	VOC Delta GK (B.1.617.2+AY.*)	GK	AY.9	2	GK-AY.9	21I (Delta)
all	8419316	2021-07-01	VOC Delta GK (B.1.617.2+AY.*)	GK	AY.9	3	GK-AY.9	21I (Delta)
all	8419316	2021-08-01	VOC Delta GK (B.1.617.2+AY.*)	GK	AY.9	11	GK-AY.9	21I (Delta)
all	8419316	2021-09-01	VOC Delta GK (B.1.617.2+AY.*)	GK	AY.9	6	GK-AY.9	21I (Delta)
all	14570000	2021-11-01	VOC Delta GK (B.1.617.2+AY.*)	GK	AY.9	1	GK-AY.9	21I (Delta)
all	2319719	2021-07-01	VOC Delta GK (B.1.617.2+AY.*)	GK	AY.9.2	2	GK-AY.9.2	21I (Delta)
all	2319719	2021-10-01	VOC Delta GK (B.1.617.2+AY.*)	GK	AY.9.2	1	GK-AY.9.2	21I (Delta)
all	8419316	2021-07-01	VOC Delta GK (B.1.617.2+AY.*)	GK	AY.9.2	11	GK-AY.9.2	21I (Delta)
all	8419316	2021-08-01	VOC Delta GK (B.1.617.2+AY.*)	GK	AY.9.2	50	GK-AY.9.2	21I (Delta)
all	8419316	2021-09-01	VOC Delta GK (B.1.617.2+AY.*)	G	AY.9.2	1	G-AY.9.2	21I (Delta)
all	8419316	2021-09-01	VOC Delta GK (B.1.617.2+AY.*)	GK	AY.9.2	18	GK-AY.9.2	21I (Delta)
all	8419316	2021-09-01	VOC Delta GK (B.1.617.2+AY.*)	GV	AY.9.2	1	GV-AY.9.2	21I (Delta)
all	8419316	2021-10-01	VOC Delta GK (B.1.617.2+AY.*)	GK	AY.9.2	11	GK-AY.9.2	21I (Delta)
all	8419316	2021-11-01	VOC Delta GK (B.1.617.2+AY.*)	GK	AY.9.2	6	GK-AY.9.2	21I (Delta)
all	8419316	2021-12-01	VOC Delta GK (B.1.617.2+AY.*)	GK	AY.9.2	6	GK-AY.9.2	21I (Delta)
all	14570000	2021-07-01	VOC Delta GK (B.1.617.2+AY.*)	GK	AY.9.2	1	GK-AY.9.2	21I (Delta)
all	14570000	2021-08-01	VOC Delta GK (B.1.617.2+AY.*)	GK	AY.9.2	2	GK-AY.9.2	21I (Delta)
all	14570000	2021-09-01	VOC Delta GK (B.1.617.2+AY.*)	GK	AY.9.2	5	GK-AY.9.2	21I (Delta)
all	14570000	2021-11-01	VOC Delta GK (B.1.617.2+AY.*)	GK	AY.9.2	1	GK-AY.9.2	21I (Delta)
all	14570000	2021-12-01	VOC Delta GK (B.1.617.2+AY.*)	GK	AY.9.2	16	GK-AY.9.2	21I (Delta)
all	14570000	2021-07-01	VOC Delta GK (B.1.617.2+AY.*)	GK	AY.9.2.1	2	GK-AY.9.2.1	NA
all	14570000	2021-08-01	VOC Delta GK (B.1.617.2+AY.*)	GK	AY.9.2.1	50	GK-AY.9.2.1	NA
all	14570000	2021-08-01	VOC Delta GK (B.1.617.2+AY.*)	GV	AY.9.2.1	1	GV-AY.9.2.1	NA
all	14570000	2021-09-01	VOC Delta GK (B.1.617.2+AY.*)	GK	AY.9.2.1	14	GK-AY.9.2.1	NA
all	14570000	2021-11-01	VOC Delta GK (B.1.617.2+AY.*)	GK	AY.9.2.1	3	GK-AY.9.2.1	NA
all	14570000	2021-12-01	VOC Delta GK (B.1.617.2+AY.*)	GK	AY.9.2.1	42	GK-AY.9.2.1	NA
all	14570000	2021-12-01	VOC Delta GK (B.1.617.2+AY.*)	O	AY.9.2.1	2	O-AY.9.2.1	NA
all	8419316	2021-10-01	VOC Delta GK (B.1.617.2+AY.*)	GK	AY.92	2	GK-AY.92	NA
all	8419316	2021-11-01	VOC Delta GK (B.1.617.2+AY.*)	GK	AY.92	1	GK-AY.92	NA
all	14570000	2021-11-01	VOC Delta GK (B.1.617.2+AY.*)	GK	AY.92	2	GK-AY.92	NA
all	8419316	2021-09-01	VOC Delta GK (B.1.617.2+AY.*)	GK	AY.93	2	GK-AY.93	NA
all	8419316	2021-12-01	VOC Delta GK (B.1.617.2+AY.*)	GK	AY.93	1	GK-AY.93	NA
all	14570000	2021-07-01	VOC Delta GK (B.1.617.2+AY.*)	GK	AY.93	1	GK-AY.93	NA
all	14570000	2021-08-01	VOC Delta GK (B.1.617.2+AY.*)	GK	AY.93	5	GK-AY.93	NA
all	14570000	2021-09-01	VOC Delta GK (B.1.617.2+AY.*)	GK	AY.93	18	GK-AY.93	NA
all	14570000	2021-10-01	VOC Delta GK (B.1.617.2+AY.*)	GK	AY.93	6	GK-AY.93	NA
all	14570000	2021-11-01	VOC Delta GK (B.1.617.2+AY.*)	GK	AY.93	2	GK-AY.93	NA
all	14570000	2021-12-01	VOC Delta GK (B.1.617.2+AY.*)	GK	AY.93	4	GK-AY.93	NA
all	8419316	2021-08-01	VOC Delta GK (B.1.617.2+AY.*)	GK	AY.94	1	GK-AY.94	NA
all	1205380	2021-08-01	VOC Delta GK (B.1.617.2+AY.*)	GK	AY.95	1	GK-AY.95	NA
all	8419316	2021-08-01	VOC Delta GK (B.1.617.2+AY.*)	GK	AY.95	1	GK-AY.95	NA
all	8419316	2021-12-01	VOC Delta GK (B.1.617.2+AY.*)	GK	AY.95	2	GK-AY.95	NA
all	2319719	2021-10-01	VOC Delta GK (B.1.617.2+AY.*)	G	AY.98	1	G-AY.98	NA
all	2319719	2021-12-01	VOC Delta GK (B.1.617.2+AY.*)	GK	AY.98	1	GK-AY.98	NA
[truncated: 5,719 more rows]

## Sheet: WNY
Pango.lineage	Variant	2021-1	2021-2	2021-3	2021-4	2021-5	2021-6	2021-7	2021-8	2021-9	2021-10	2021-11	2021-12
AY.1	VOC Delta GK (B.1.617.2+AY.*)									1			1
AY.102	VOC Delta GK (B.1.617.2+AY.*)											4
AY.107	VOC Delta GK (B.1.617.2+AY.*)								1		1
AY.110	VOC Delta GK (B.1.617.2+AY.*)								1
AY.112	VOC Delta GK (B.1.617.2+AY.*)								1	7	1
AY.113	VOC Delta GK (B.1.617.2+AY.*)										1	1	4
AY.114	VOC Delta GK (B.1.617.2+AY.*)						1	1		2
AY.116.1	VOC Delta GK (B.1.617.2+AY.*)							1	1			3	1
AY.117	VOC Delta GK (B.1.617.2+AY.*)									2	4	11	15
AY.118	VOC Delta GK (B.1.617.2+AY.*)							3	17	21	24	44	26
AY.119	VOC Delta GK (B.1.617.2+AY.*)							4	37	55	30	28	14
AY.119.2	VOC Delta GK (B.1.617.2+AY.*)									4	4	2	1
AY.120	VOC Delta GK (B.1.617.2+AY.*)								2	3	5	3
AY.120.2	VOC Delta GK (B.1.617.2+AY.*)								9	5
AY.121	VOC Delta GK (B.1.617.2+AY.*)								3		3	1	2
AY.122	VOC Delta GK (B.1.617.2+AY.*)								12	11	39	76	1
AY.126	VOC Delta GK (B.1.617.2+AY.*)									1	1
AY.127	VOC Delta GK (B.1.617.2+AY.*)								1		1	2	2
AY.13	VOC Delta GK (B.1.617.2+AY.*)								1	4	9	25	4
AY.14	VOC Delta GK (B.1.617.2+AY.*)							2	9	6	3	2
AY.16	VOC Delta GK (B.1.617.2+AY.*)								1
AY.2	VOC Delta GK (B.1.617.2+AY.*)							1	3	1
AY.20	VOC Delta GK (B.1.617.2+AY.*)							1	7	9	14	7	1
AY.24	VOC Delta GK (B.1.617.2+AY.*)									1
AY.26	VOC Delta GK (B.1.617.2+AY.*)							6	42	22	8
AY.3.1	VOC Delta GK (B.1.617.2+AY.*)							2	8	7	4	7	1
AY.34	VOC Delta GK (B.1.617.2+AY.*)									1
AY.34.1	VOC Delta GK (B.1.617.2+AY.*)											1
AY.35	VOC Delta GK (B.1.617.2+AY.*)								1
AY.39.1	VOC Delta GK (B.1.617.2+AY.*)									4	13	1	6
AY.4	VOC Delta GK (B.1.617.2+AY.*)										14	30	12
AY.4.12	VOC Delta GK (B.1.617.2+AY.*)								1
AY.4.7	VOC Delta GK (B.1.617.2+AY.*)								1
AY.42	VOC Delta GK (B.1.617.2+AY.*)											1	1
AY.43	VOC Delta GK (B.1.617.2+AY.*)											1	4
AY.46.1	VOC Delta GK (B.1.617.2+AY.*)												1
AY.46.4	VOC Delta GK (B.1.617.2+AY.*)								3	1		5	2
AY.46.6	VOC Delta GK (B.1.617.2+AY.*)								1
AY.5	VOC Delta GK (B.1.617.2+AY.*)							3		1		1	3
AY.54	VOC Delta GK (B.1.617.2+AY.*)							1	12	1	1
AY.56	VOC Delta GK (B.1.617.2+AY.*)					1
AY.62	VOC Delta GK (B.1.617.2+AY.*)								8	4
AY.64	VOC Delta GK (B.1.617.2+AY.*)								1
AY.75	VOC Delta GK (B.1.617.2+AY.*)							6	30	18	54	26	8
AY.98.1	VOC Delta GK (B.1.617.2+AY.*)							4	2	4	2	4
B												2
B.1.1		2
B.1.1.161						1
B.1.1.222		1
B.1.1.265		1	1
B.1.1.345		2	1
B.1.1.434		4
B.1.1.464		2
B.1.1.519				1		2
B.1.110.3			1
B.1.234		7	5
B.1.243.2									1
B.1.265		1
B.1.280		1
B.1.311		20	17	2
B.1.349		14
B.1.350	VOC Beta GH/501Y.V2 (B.1.351+B.1.351.2+B.1.351.3)					1
B.1.351	VOC Beta GH/501Y.V2 (B.1.351+B.1.351.2+B.1.351.3)			18	42	10
B.1.361			1
B.1.400		3	2	1
B.1.409			1	1
B.1.427	VOI Epsilon GH/452R.V1 (B.1.429+B.1.427)	2	17	40	31	3
B.1.429			4		1
B.1.541		12	5
B.1.551		5
B.1.556		14	3
B.1.563		1
B.1.565		1
B.1.568			1
B.1.577		1	1
B.1.582		6	4	3
B.1.595		2
B.1.596		1
B.1.603			1
B.1.617.1	VOI Kappa G/452R.V3 (B.1.617.1)				1
B.1.621	VOI Mu GH (B.1.621+B.1.621.1)							4
B.1.637			1	3	1
BA.1.1.14	VOC Omicron GRA (B.1.1.529+BA.*)												1
BA.1.1.18	VOC Omicron GRA (B.1.1.529+BA.*)												14
BA.1.1.2	VOC Omicron GRA (B.1.1.529+BA.*)												2
BA.1.1.8	VOC Omicron GRA (B.1.1.529+BA.*)												2
BA.1.20	VOC Omicron GRA (B.1.1.529+BA.*)												7
BA.1.6	VOC Omicron GRA (B.1.1.529+BA.*)												1
C.37	VOI Lambda GR/452Q.V1 (C.37+C.37.1)			1
P.1	VOC Gamma GR/501Y.V3 (P.1+P.1.*)				2	2		2
P.1.15	VOC Gamma GR/501Y.V3 (P.1+P.1.*)				1	1
P.1.7	VOC Gamma GR/501Y.V3 (P.1+P.1.*)								9
P.2	VOI Zeta GR/484K.V2 (P.2)	4
R.1		4		2	2

## Sheet: NYC
Pango.lineage	Variant	2021-1	2021-2	2021-3	2021-4	2021-5	2021-6	2021-7	2021-8	2021-9	2021-10	2021-11	2021-12
A			3
A.2.5		1	22	34	31	46	10	7	3	1
A.2.5.1				2	4
A.2.5.2		7	1	3	1	1		3				1
A.2.5.3					1
A.21			1
A.23.1		1	1	1	4
A.28			1
AY.1	VOC Delta GK (B.1.617.2+AY.*)					4		2	30	5	3	3	1
AY.101	VOC Delta GK (B.1.617.2+AY.*)									1	1
AY.102	VOC Delta GK (B.1.617.2+AY.*)					1			1	1	1
AY.103.1	VOC Delta GK (B.1.617.2+AY.*)								2	3
AY.105	VOC Delta GK (B.1.617.2+AY.*)						1		10	1	10	1
AY.106	VOC Delta GK (B.1.617.2+AY.*)									2	5	3
AY.107	VOC Delta GK (B.1.617.2+AY.*)					7	26	9	31	71	31	9	22
AY.108	VOC Delta GK (B.1.617.2+AY.*)									2
AY.109	VOC Delta GK (B.1.617.2+AY.*)							2	4	3	7	20	2
AY.110	VOC Delta GK (B.1.617.2+AY.*)							13	39	20		2
AY.111	VOC Delta GK (B.1.617.2+AY.*)								2	3	2	2	2
AY.112	VOC Delta GK (B.1.617.2+AY.*)							4	7	6	4	7	2
AY.112	VOC Omicron GRA (B.1.1.529+BA.*)												1
AY.112.2	VOC Delta GK (B.1.617.2+AY.*)											2
AY.113	VOC Delta GK (B.1.617.2+AY.*)							19	97	133	69	51	31
AY.114	VOC Delta GK (B.1.617.2+AY.*)							12	21	22	13	2	2
AY.116	VOC Delta GK (B.1.617.2+AY.*)							3	1			1
AY.116.1	VOC Delta GK (B.1.617.2+AY.*)							4	13	12	3	2	2
AY.117	VOC Delta GK (B.1.617.2+AY.*)								9	17	35	85	64
AY.118	VOC Delta GK (B.1.617.2+AY.*)						4	117	192	153	73	124	71
AY.119	VOC Delta GK (B.1.617.2+AY.*)					1	34	139	408	396	394	401	227
AY.119.1	VOC Delta GK (B.1.617.2+AY.*)										1	2	1
AY.119.2	VOC Delta GK (B.1.617.2+AY.*)							33	119	75	81	54	42
AY.120	VOC Delta GK (B.1.617.2+AY.*)								3	9	10	16	6
AY.120.1	VOC Delta GK (B.1.617.2+AY.*)								17	34	19	4	8
AY.120.2	VOC Delta GK (B.1.617.2+AY.*)										1		6
AY.120.2.1	VOC Delta GK (B.1.617.2+AY.*)								7	1
AY.121	VOC Delta GK (B.1.617.2+AY.*)					1		1	34	29	154	171	160
AY.121.1	VOC Delta GK (B.1.617.2+AY.*)											2
AY.122	VOC Delta GK (B.1.617.2+AY.*)				1	17	34	224	505	314	262	213	186
AY.122.1	VOC Delta GK (B.1.617.2+AY.*)								12	28	48	11	6
AY.122.2	VOC Delta GK (B.1.617.2+AY.*)										1
AY.122.4	VOC Delta GK (B.1.617.2+AY.*)										4	9	17
AY.122.6	VOC Delta GK (B.1.617.2+AY.*)											1	3
AY.124	VOC Delta GK (B.1.617.2+AY.*)										2		2
AY.124.1	VOC Delta GK (B.1.617.2+AY.*)										2
AY.124.1.1	VOC Delta GK (B.1.617.2+AY.*)											1
AY.125	VOC Delta GK (B.1.617.2+AY.*)								9	18	9	21	20
AY.126	VOC Delta GK (B.1.617.2+AY.*)							5	3	7	7	20	29
AY.127	VOC Delta GK (B.1.617.2+AY.*)							1	7	30	59	63	68
AY.128	VOC Delta GK (B.1.617.2+AY.*)									1
AY.129	VOC Delta GK (B.1.617.2+AY.*)								3	7	7	24	14
AY.13	VOC Delta GK (B.1.617.2+AY.*)					1		12	10	21	32	18	5
AY.131	VOC Delta GK (B.1.617.2+AY.*)								1
AY.132	VOC Delta GK (B.1.617.2+AY.*)												1
AY.133	VOC Delta GK (B.1.617.2+AY.*)									1	2
AY.134	VOC Delta GK (B.1.617.2+AY.*)										2
AY.14	VOC Delta GK (B.1.617.2+AY.*)						15	186	321	77	49	43	22
AY.15	VOC Delta GK (B.1.617.2+AY.*)								1
AY.16	VOC Delta GK (B.1.617.2+AY.*)							1	8	4	1	1	1
AY.2	VOC Delta GK (B.1.617.2+AY.*)						2	3	8	4	2	4	2
AY.20	VOC Delta GK (B.1.617.2+AY.*)						2	85	226	247	110	95	30
AY.23	VOC Delta GK (B.1.617.2+AY.*)						11		1		3	3	1
AY.24	VOC Delta GK (B.1.617.2+AY.*)							4	11	6
AY.25.1.2	VOC Delta GK (B.1.617.2+AY.*)											4	2
AY.25.2	VOC Delta GK (B.1.617.2+AY.*)								1			1	2
AY.26	VOC Delta GK (B.1.617.2+AY.*)				2	10	20	364	1064	572	188	138	64
AY.27	VOC Delta GK (B.1.617.2+AY.*)								3	1	7	3	3
AY.28	VOC Delta GK (B.1.617.2+AY.*)											1
AY.29	VOC Delta GK (B.1.617.2+AY.*)								1	2
AY.3.1	VOC Delta GK (B.1.617.2+AY.*)							16	86	92	104	52	57
AY.3.2	VOC Delta GK (B.1.617.2+AY.*)									1			4
AY.3.3	VOC Delta GK (B.1.617.2+AY.*)									1	39	73	92
AY.30	VOC Delta GK (B.1.617.2+AY.*)								1
AY.33	VOC Delta GK (B.1.617.2+AY.*)								18	15	5	7	7
AY.34	VOC Delta GK (B.1.617.2+AY.*)							8	12	1	8	3
AY.34.1	VOC Delta GK (B.1.617.2+AY.*)							2	5	1	1	3	3
AY.34.2	VOC Delta GK (B.1.617.2+AY.*)								2	1	1
AY.35	VOC Delta GK (B.1.617.2+AY.*)							9	4	10	17	16	3
AY.36	VOC Delta GK (B.1.617.2+AY.*)							3	15	25	20	19	7
AY.36.1	VOC Delta GK (B.1.617.2+AY.*)										1
AY.37	VOC Delta GK (B.1.617.2+AY.*)						8	49	138	51	9	4	1
AY.38	VOC Delta GK (B.1.617.2+AY.*)								4
AY.39.1	VOC Delta GK (B.1.617.2+AY.*)							2	44	61	69	59	42
AY.39.1.2	VOC Delta GK (B.1.617.2+AY.*)											1
AY.39.2	VOC Delta GK (B.1.617.2+AY.*)							1			17	3	3
AY.39.3	VOC Delta GK (B.1.617.2+AY.*)												2
AY.4	VOC Delta GK (B.1.617.2+AY.*)							11	75	115	146	124	135
AY.4.10	VOC Delta GK (B.1.617.2+AY.*)												1
AY.4.15	VOC Delta GK (B.1.617.2+AY.*)											1
AY.4.17	VOC Delta GK (B.1.617.2+AY.*)											1
AY.4.2	VOC Delta GK (B.1.617.2+AY.*)										3	16	14
AY.4.2.1	VOC Delta GK (B.1.617.2+AY.*)											5	5
AY.4.2.2	VOC Delta GK (B.1.617.2+AY.*)								1			4	3
AY.4.3	VOC Delta GK (B.1.617.2+AY.*)										4
AY.4.4	VOC Delta GK (B.1.617.2+AY.*)									5
AY.4.5	VOC Delta GK (B.1.617.2+AY.*)											1	4
AY.4.6	VOC Delta GK (B.1.617.2+AY.*)											1
AY.4.7	VOC Delta GK (B.1.617.2+AY.*)							1	7	1
AY.4.8	VOC Delta GK (B.1.617.2+AY.*)									1		1
AY.4.9	VOC Delta GK (B.1.617.2+AY.*)										1		1
AY.42	VOC Delta GK (B.1.617.2+AY.*)							1	11	2	8	16	5
AY.42.1	VOC Delta GK (B.1.617.2+AY.*)							2
AY.43	VOC Delta GK (B.1.617.2+AY.*)						1	17	68	73	115	157	161
AY.43	VOC Omicron GRA (B.1.1.529+BA.*)												1
AY.43.3	VOC Delta GK (B.1.617.2+AY.*)										2	7	12
AY.43.8	VOC Delta GK (B.1.617.2+AY.*)									1		5
AY.45	VOC Delta GK (B.1.617.2+AY.*)									7	28	11	3
AY.46	VOC Delta GK (B.1.617.2+AY.*)					3		4	5	8	1	10
AY.46.1	VOC Delta GK (B.1.617.2+AY.*)							1	44	25	10	8	29
AY.46.2	VOC Delta GK (B.1.617.2+AY.*)									1
AY.46.4	VOC Delta GK (B.1.617.2+AY.*)								10	16	12	9	4
AY.46.5	VOC Delta GK (B.1.617.2+AY.*)												1
AY.46.6	VOC Delta GK (B.1.617.2+AY.*)								2	34	9	13	4
AY.48	VOC Delta GK (B.1.617.2+AY.*)							2	7
AY.5	VOC Delta GK (B.1.617.2+AY.*)						4	16	44	94	35	30	20
AY.5.3	VOC Delta GK (B.1.617.2+AY.*)							1	1	7	21	6	5
AY.51	VOC Delta GK (B.1.617.2+AY.*)								2		2
AY.52	VOC Delta GK (B.1.617.2+AY.*)						2	1	4
AY.53	VOC Delta GK (B.1.617.2+AY.*)							3
AY.54	VOC Delta GK (B.1.617.2+AY.*)						1	48	67	47	12	9	2
AY.55	VOC Delta GK (B.1.617.2+AY.*)					2
AY.56	VOC Delta GK (B.1.617.2+AY.*)						1	2	1	1		11	10
AY.57	VOC Delta GK (B.1.617.2+AY.*)												2
AY.59	VOC Delta GK (B.1.617.2+AY.*)								4
AY.6	VOC Delta GK (B.1.617.2+AY.*)									4	3
AY.62	VOC Delta GK (B.1.617.2+AY.*)							3	12	3
AY.64	VOC Delta GK (B.1.617.2+AY.*)							3	9	12	6	7	5
AY.65	VOC Delta GK (B.1.617.2+AY.*)								4	2		2	2
AY.67	VOC Delta GK (B.1.617.2+AY.*)							3	9	4
AY.7.1	VOC Delta GK (B.1.617.2+AY.*)								2	1	1	6
AY.70	VOC Delta GK (B.1.617.2+AY.*)							1		2
AY.72	VOC Delta GK (B.1.617.2+AY.*)									2
AY.73	VOC Delta GK (B.1.617.2+AY.*)								3
AY.75	VOC Delta GK (B.1.617.2+AY.*)				4	16	110	246	458	230	132	114	100
AY.77	VOC Delta GK (B.1.617.2+AY.*)							3	9			1
AY.78	VOC Delta GK (B.1.617.2+AY.*)							8
AY.80	VOC Delta GK (B.1.617.2+AY.*)												1
AY.81	VOC Delta GK (B.1.617.2+AY.*)							1				1
AY.83	VOC Delta GK (B.1.617.2+AY.*)						1	2
AY.84	VOC Delta GK (B.1.617.2+AY.*)									2	2
AY.87	VOC Delta GK (B.1.617.2+AY.*)											1	2
AY.88	VOC Delta GK (B.1.617.2+AY.*)								8	11		3
AY.9	VOC Delta GK (B.1.617.2+AY.*)							3	11	6
AY.9.2	VOC Delta GK (B.1.617.2+AY.*)							11	50	20	11	6	6
AY.92	VOC Delta GK (B.1.617.2+AY.*)										2	1
AY.93	VOC Delta GK (B.1.617.2+AY.*)									1			1
AY.94	VOC Delta GK (B.1.617.2+AY.*)								1
AY.95	VOC Delta GK (B.1.617.2+AY.*)								1				2
AY.98	VOC Delta GK (B.1.617.2+AY.*)							2	3	4	10	5	20
AY.98.1	VOC Delta GK (B.1.617.2+AY.*)							3	40	20	50	56	42
AY.99	VOC Delta GK (B.1.617.2+AY.*)												1
AY.99.2	VOC Delta GK (B.1.617.2+AY.*)								4	2		2
AZ.1			3
AZ.3					2
B		2	2	6	2		2	2	6	6	10	72	26
B.1.1		138	102	116	72	12	4	2					10
B.1.1	VOC Omicron GRA (B.1.1.529+BA.*)												146
B.1.1.1		9	15	1
B.1.1.101		6	8	4
B.1.1.121		1
B.1.1.135		5
B.1.1.141							1
B.1.1.161			1
B.1.1.174				1
B.1.1.189		1
B.1.1.192		8	3	1
B.1.1.200			1
B.1.1.207		12	6
B.1.1.216		2	1
B.1.1.220				5
B.1.1.222		16	12	10	4
B.1.1.231		9	3
B.1.1.243		2
B.1.1.25		31	16	4	4
B.1.1.265		33	9	4
B.1.1.274				1
B.1.1.28		33	21	3	2
B.1.1.291		3
B.1.1.304		1	1	12
B.1.1.306		2	2	1
B.1.1.316		21	9
B.1.1.317		7	2
B.1.1.318		1	4	2	78	15	5	1
B.1.1.328			1
B.1.1.329		1
B.1.1.33		1	1
B.1.1.345			2
B.1.1.348		9	10	19	14
B.1.1.351		4
B.1.1.362		1
B.1.1.368		10	2		3
B.1.1.372				1	1
B.1.1.389		2
B.1.1.39		3
B.1.1.397		1
B.1.1.406			1
B.1.1.409		1		1	1
B.1.1.411		12	1			1
B.1.1.416		2	1
B.1.1.419				2
B.1.1.420		9	2	1	1
B.1.1.432		3	2
B.1.1.434		486	175	33	3	1	1
B.1.1.461		5	1
B.1.1.464		8
B.1.1.467		4		1
B.1.1.486		97	57	8		1
B.1.1.517		1
B.1.1.518		1	1
B.1.1.519		108	146	167	72	5	3	2			1
B.1.1.523					3	1
B.1.1.525		5	5
B.1.1.529	VOC Omicron GRA (B.1.1.529+BA.*)												2
B.1.108		1	2	1
B.1.110.3		23	18	5				1
B.1.111		38	58	36	5
B.1.126			1
B.1.139		1	2
B.1.160		2	1
B.1.177		9	1	1
B.1.177.46		1
B.1.177.86		4
B.1.189			1
B.1.210		2
B.1.214.2				3	3
B.1.214.3		1
B.1.221		2
B.1.232		6		1
B.1.234		101	61	9	2
B.1.239		1
B.1.240		12	3	2
B.1.241		3
B.1.243.1				1
B.1.243.2								2	1
B.1.258		2	1
B.1.265			3
B.1.280		2
B.1.293		4
B.1.298		10	3
B.1.306		25	8
B.1.311		72	28	21	1	1	1	1
B.1.313			15	6	4
B.1.320		3
B.1.324		2	1		1
B.1.338				1	1
B.1.340		1
B.1.349		39	17	1
B.1.351	VOC Beta GH/501Y.V2 (B.1.351+B.1.351.2+B.1.351.3)	4	12	50	64	56						2
B.1.351.2	VOC Beta GH/501Y.V2 (B.1.351+B.1.351.2+B.1.351.3)				1
B.1.351.3	VOC Beta GH/501Y.V2 (B.1.351+B.1.351.2+B.1.351.3)			3	12	5	2
B.1.351.5	VOC Beta GH/501Y.V2 (B.1.351+B.1.351.2+B.1.351.3)							2
B.1.36		7	5
B.1.36.1		1
B.1.36.24			3
B.1.36.29		2
B.1.36.31		1	3	3
B.1.36.38		1
B.1.36.8		2	1	1
B.1.361		14	2
B.1.362		8	7	3
B.1.369		48	18	10	2				4
B.1.375		18	8	2
B.1.396		8	1
B.1.400		4	1
B.1.404			3	1
B.1.409		244	89	13	1		1
B.1.415.1							1	2
B.1.426				1	1
B.1.427	VOI Epsilon GH/452R.V1 (B.1.429+B.1.427)	40	104	147	81	9
B.1.429	VOI Epsilon GH/452R.V1 (B.1.429+B.1.427)	95	143	141	57	11
B.1.433		19	2	1
B.1.436			1	1
B.1.443			1
B.1.448		2
B.1.466.2				1
B.1.471		4	1
B.1.478		7	10
B.1.480			2	1
B.1.503		2	3
B.1.507		1
B.1.509		8	1
B.1.517		160	98	25	1	1
B.1.525	VOI Eta G/484K.V3 (B.1.525)	2	9	19	38	17
B.1.539		2	1
B.1.541		3	1
B.1.543		27	5
B.1.544		2	3
B.1.551		1	3
B.1.556		3	2
B.1.558			1
B.1.561		3	7	3
B.1.563		8	1	2
B.1.564		2
B.1.565		2
B.1.567		1
B.1.568		4			2
B.1.575		200	328	237	102	14	1		1	1		1
B.1.576		1
B.1.582		19	18	3
B.1.585		3	1	2
B.1.588		93	61	34	2
B.1.595		19	21	5	1
B.1.595.1		1
B.1.596		27	22	12	2
B.1.599		1
B.1.603		4	6	8	1
B.1.604		6	7	6	1
B.1.605		16	2
B.1.609		1	1
B.1.612		1
B.1.617.1	VOI Kappa G/452R.V3 (B.1.617.1)			2	5
B.1.617.3					3
B.1.619				5	2
B.1.620							1
B.1.621	VOI Mu GH (B.1.621+B.1.621.1)			4	48	36	94	164	62	26	4	2
B.1.621.1	VOI Mu GH (B.1.621+B.1.621.1)				11	42	75	36	15	4
B.1.621.2	VOI Mu GH (B.1.621+B.1.621.1)							3					2
B.1.623		22	53	84	48	3
B.1.625				1	8	3	4	1
B.1.627			1	4	3	2	1
B.1.630						8	9	6	4	1
B.1.631					1	1	6	4	2
B.1.632								1
B.1.634						3	1
B.1.637		207	426	929	761	155	10	1	1
B.1.637.1										1	1	15	27
B.1.638					1
B.1.639		1	3	7	3				2		1	1
B.1.81				1
B.1.94				1
B.19									1
BA.1.1.1	VOC Omicron GRA (B.1.1.529+BA.*)												1
BA.1.1.10	VOC Omicron GRA (B.1.1.529+BA.*)												8
BA.1.1.11	VOC Omicron GRA (B.1.1.529+BA.*)												1
BA.1.1.13	VOC Omicron GRA (B.1.1.529+BA.*)												1
BA.1.1.14	VOC Omicron GRA (B.1.1.529+BA.*)												53
BA.1.1.15	VOC Omicron GRA (B.1.1.529+BA.*)												13
BA.1.1.16	VOC Omicron GRA (B.1.1.529+BA.*)												14
BA.1.1.18	VOC Omicron GRA (B.1.1.529+BA.*)												232
BA.1.1.2	VOC Omicron GRA (B.1.1.529+BA.*)												16
BA.1.1.8	VOC Omicron GRA (B.1.1.529+BA.*)												2
BA.1.13	VOC Omicron GRA (B.1.1.529+BA.*)												20
BA.1.14	VOC Omicron GRA (B.1.1.529+BA.*)											1	1
BA.1.15.1	VOC Omicron GRA (B.1.1.529+BA.*)												13
BA.1.15.2	VOC Omicron GRA (B.1.1.529+BA.*)												1
BA.1.16	VOC Omicron GRA (B.1.1.529+BA.*)												1
BA.1.17	VOC Omicron GRA (B.1.1.529+BA.*)												348
BA.1.18	VOC Omicron GRA (B.1.1.529+BA.*)												99
BA.1.19	VOC Omicron GRA (B.1.1.529+BA.*)												1
BA.1.20	VOC Omicron GRA (B.1.1.529+BA.*)												134
BA.1.5	VOC Omicron GRA (B.1.1.529+BA.*)												1
BA.1.6	VOC Omicron GRA (B.1.1.529+BA.*)												1
BA.1.9	VOC Omicron GRA (B.1.1.529+BA.*)												1
BB.2	VOI Mu GH (B.1.621+B.1.621.1)							1
C.16		3	1
C.17					1
C.2.1		1	2	2	2
C.23		3	5
C.31		5	1	1
C.36		5	4	1	2
C.36.3				3	33	18	14	5	1
C.36.3.1				1	9	9
C.37	VOI Lambda GR/452Q.V1 (C.37+C.37.1)	3	3	21	20	8	8	1	5	1
C.37.1	VOI Lambda GR/452Q.V1 (C.37+C.37.1)		1		4	5	1	2
C.38				1	1	1	1
L.3		2	3
N.5		1	7	2	1
P.1	VOC Gamma GR/501Y.V3 (P.1+P.1.*)			92	262	368	158	96	30	8	6	2
P.1.1	VOC Gamma GR/501Y.V3 (P.1+P.1.*)			1	1
P.1.10	VOC Gamma GR/501Y.V3 (P.1+P.1.*)			12	54	46	8	4	4
P.1.12	VOC Gamma GR/501Y.V3 (P.1+P.1.*)				1				7
P.1.12.1	VOC Gamma GR/501Y.V3 (P.1+P.1.*)								1
P.1.13	VOC Gamma GR/501Y.V3 (P.1+P.1.*)				5	1
P.1.14	VOC Gamma GR/501Y.V3 (P.1+P.1.*)			1
P.1.15	VOC Gamma GR/501Y.V3 (P.1+P.1.*)			1	2		2	1	1
P.1.17	VOC Gamma GR/501Y.V3 (P.1+P.1.*)			2	12	14	4	11	3
P.1.2	VOC Gamma GR/501Y.V3 (P.1+P.1.*)			1
P.1.7	VOC Gamma GR/501Y.V3 (P.1+P.1.*)							1	3
P.2	VOI Zeta GR/484K.V2 (P.2)	20	16			4
Q.1	VOC Alpha GRY (B.1.1.7+Q.*)							1
Q.3	VOC Alpha GRY (B.1.1.7+Q.*)			1	5	3	9
Q.4	VOC Alpha GRY (B.1.1.7+Q.*)	1		1	4
R.1		38	114	270	106			4	4
R.2		1
Unassigned		78	34	65	6	3	1	2	1	1			2329
Unassigned	VOC Omicron GRA (B.1.1.529+BA.*)												8
W.1		4	2		1
XB			1	3	20	16	11	25	8	2	1

## Sheet: LI
Pango.lineage	Variant	2021-1	2021-2	2021-3	2021-4	2021-5	2021-6	2021-7	2021-8	2021-9	2021-10	2021-11	2021-12
A.2.5					2	1	1
AY.107	VOC Delta GK (B.1.617.2+AY.*)									1
AY.110	VOC Delta GK (B.1.617.2+AY.*)								1
AY.112	VOC Delta GK (B.1.617.2+AY.*)								3
AY.113	VOC Delta GK (B.1.617.2+AY.*)										1
AY.114	VOC Delta GK (B.1.617.2+AY.*)								1				1
AY.118	VOC Delta GK (B.1.617.2+AY.*)							4	2	1	1
AY.119	VOC Delta GK (B.1.617.2+AY.*)						1	8	1	2	3	3	2
AY.119.2	VOC Delta GK (B.1.617.2+AY.*)								2		1
AY.120.1	VOC Delta GK (B.1.617.2+AY.*)							1	1	1
AY.121	VOC Delta GK (B.1.617.2+AY.*)										1	2
AY.122	VOC Delta GK (B.1.617.2+AY.*)							10	2	2	3
AY.122.1	VOC Delta GK (B.1.617.2+AY.*)											1
AY.127	VOC Delta GK (B.1.617.2+AY.*)										2	1
AY.14	VOC Delta GK (B.1.617.2+AY.*)							6	3	1
AY.20	VOC Delta GK (B.1.617.2+AY.*)								2
AY.23	VOC Delta GK (B.1.617.2+AY.*)								1	1
AY.26	VOC Delta GK (B.1.617.2+AY.*)							10	8	2
AY.34.1	VOC Delta GK (B.1.617.2+AY.*)							1
AY.36	VOC Delta GK (B.1.617.2+AY.*)												1
AY.37	VOC Delta GK (B.1.617.2+AY.*)								4	1
AY.39.1	VOC Delta GK (B.1.617.2+AY.*)								1	2
AY.39.2	VOC Delta GK (B.1.617.2+AY.*)										1
AY.43	VOC Delta GK (B.1.617.2+AY.*)									1	1		1
AY.46.1	VOC Delta GK (B.1.617.2+AY.*)								1
AY.5	VOC Delta GK (B.1.617.2+AY.*)												1
AY.54	VOC Delta GK (B.1.617.2+AY.*)							1	3
AY.64	VOC Delta GK (B.1.617.2+AY.*)											2
AY.7.2	VOC Delta GK (B.1.617.2+AY.*)									1
AY.70	VOC Delta GK (B.1.617.2+AY.*)								1
AY.75	VOC Delta GK (B.1.617.2+AY.*)						4	16	8	4
B.1.1		14	2	10	2
B.1.1.101			2
B.1.1.192		3
B.1.1.207		1
B.1.1.222				1
B.1.1.231		1
B.1.1.25		4
B.1.1.265		3	1
B.1.1.28		1		1	0
B.1.1.306		1
B.1.1.318				1	4
B.1.1.348		2		1
B.1.1.359		1
B.1.1.368		1		1
B.1.1.411			2	1
B.1.1.416		1
B.1.1.434		49	13	2
B.1.1.461		1
B.1.1.464		1
B.1.1.467		1	1
B.1.1.486		10	1	1
B.1.1.519		6	5	27	4
B.1.110.3		1
B.1.111		1	2	1	2
B.1.177.53		1
B.1.232		1
B.1.234		14	1	1
B.1.240		1
B.1.311		3
B.1.324		1	2	2	2	1
B.1.351	VOC Beta GH/501Y.V2 (B.1.351+B.1.351.2+B.1.351.3)		2	2	2
B.1.351.3	VOC Beta GH/501Y.V2 (B.1.351+B.1.351.2+B.1.351.3)				1
B.1.36.8		1
B.1.362				1
B.1.369		8		2
B.1.375		3
B.1.409		30	5	3
B.1.427	VOI Epsilon GH/452R.V1 (B.1.429+B.1.427)	2	1	8	1
B.1.429	VOI Epsilon GH/452R.V1 (B.1.429+B.1.427)	6	7	7	5
B.1.433		2
B.1.478			1
B.1.499.1		1		1
B.1.517		19	9	1
B.1.525	VOI Eta G/484K.V3 (B.1.525)		5	2	1	1
B.1.551		1
B.1.558		2
B.1.575		3	7	14	4	1
B.1.576		3
B.1.585		1
B.1.588		31	1	2
B.1.595				1
B.1.601		1	1
B.1.603		1
B.1.605		1
B.1.609		1	1
B.1.621	VOI Mu GH (B.1.621+B.1.621.1)				4			6
B.1.623			3	1
B.1.627						1
B.1.637		6	6	38	31	3	1
B.1.639				1
BA.1.1.18	VOC Omicron GRA (B.1.1.529+BA.*)												2
BA.1.17	VOC Omicron GRA (B.1.1.529+BA.*)												2
BA.1.18	VOC Omicron GRA (B.1.1.529+BA.*)												1
BA.1.20	VOC Omicron GRA (B.1.1.529+BA.*)												1
C.31		5
C.36		1
C.37	VOI Lambda GR/452Q.V1 (C.37+C.37.1)			2
L.3			1
N.5			1
P.1	VOC Gamma GR/501Y.V3 (P.1+P.1.*)			6	16	32	10	2
P.1.1	VOC Gamma GR/501Y.V3 (P.1+P.1.*)				1
P.1.10	VOC Gamma GR/501Y.V3 (P.1+P.1.*)				7	2	1
P.1.13	VOC Gamma GR/501Y.V3 (P.1+P.1.*)			2			1
P.1.7	VOC Gamma GR/501Y.V3 (P.1+P.1.*)								1
P.2	VOI Zeta GR/484K.V2 (P.2)	2	2
R.1		2	2	6
Unassigned		1
XB					2		1

## Sheet: ONTARIO, CA
Pango.lineage	Variant	2021-1	2021-2	2021-3	2021-4	2021-5	2021-6	2021-7	2021-8	2021-9	2021-10	2021-11	2021-12
A			1	1
A.23.1		7		1
A.29		1	1
AE.8		13		1
AL.1		15	5	1
AM.4		47	28	8
AT.1								1
AY.10	VOC Delta GK (B.1.617.2+AY.*)						2
AY.102	VOC Delta GK (B.1.617.2+AY.*)					1
AY.105	VOC Delta GK (B.1.617.2+AY.*)											2
AY.106	VOC Delta GK (B.1.617.2+AY.*)											4	5
AY.107	VOC Delta GK (B.1.617.2+AY.*)								2				2
AY.108	VOC Delta GK (B.1.617.2+AY.*)							1	1	1			1
AY.109	VOC Delta GK (B.1.617.2+AY.*)									3	2	5
AY.110	VOC Delta GK (B.1.617.2+AY.*)							2	2
AY.112	VOC Delta GK (B.1.617.2+AY.*)					1	11	2	11	4			2
AY.112.2	VOC Delta GK (B.1.617.2+AY.*)												1
AY.113	VOC Delta GK (B.1.617.2+AY.*)								1	1			3
AY.114	VOC Delta GK (B.1.617.2+AY.*)					2	16	3
AY.116	VOC Delta GK (B.1.617.2+AY.*)												1
AY.117	VOC Delta GK (B.1.617.2+AY.*)								1			4	10
AY.118	VOC Delta GK (B.1.617.2+AY.*)									1		1	6
AY.119	VOC Delta GK (B.1.617.2+AY.*)								9	15	2	21	24
AY.119.1	VOC Delta GK (B.1.617.2+AY.*)												2
AY.119.2	VOC Delta GK (B.1.617.2+AY.*)								9	5	11	42	42
AY.120	VOC Delta GK (B.1.617.2+AY.*)								7	2	1	3	7
AY.121	VOC Delta GK (B.1.617.2+AY.*)								21	2	1	2	9
AY.121.1	VOC Delta GK (B.1.617.2+AY.*)												1
AY.122	VOC Delta GK (B.1.617.2+AY.*)					2	5	26	19	4	11	64	147
AY.122.4	VOC Delta GK (B.1.617.2+AY.*)											1
AY.124	VOC Delta GK (B.1.617.2+AY.*)											1
AY.125	VOC Delta GK (B.1.617.2+AY.*)							1	2	4	1	1	1
AY.126	VOC Delta GK (B.1.617.2+AY.*)								12	2	1	1	8
AY.127	VOC Delta GK (B.1.617.2+AY.*)							9	3	7	2	19	42
AY.128	VOC Delta GK (B.1.617.2+AY.*)											4
AY.129	VOC Delta GK (B.1.617.2+AY.*)								2	1
AY.13	VOC Delta GK (B.1.617.2+AY.*)							1	26	4	3
AY.133	VOC Delta GK (B.1.617.2+AY.*)												2
AY.14	VOC Delta GK (B.1.617.2+AY.*)								2	5		3
AY.15	VOC Delta GK (B.1.617.2+AY.*)					3	5		4
AY.16	VOC Delta GK (B.1.617.2+AY.*)						7		5
AY.18	VOC Delta GK (B.1.617.2+AY.*)						1
AY.20	VOC Delta GK (B.1.617.2+AY.*)					1		5	8		3	5	24
AY.23	VOC Delta GK (B.1.617.2+AY.*)							2	1
AY.25.1.2	VOC Delta GK (B.1.617.2+AY.*)											1	6
AY.26	VOC Delta GK (B.1.617.2+AY.*)							16	8	4		4	14
AY.27	VOC Delta GK (B.1.617.2+AY.*)							3	164	101	57	371	390
AY.28	VOC Delta GK (B.1.617.2+AY.*)								1			2
AY.3.1	VOC Delta GK (B.1.617.2+AY.*)										1
AY.3.2	VOC Delta GK (B.1.617.2+AY.*)											1	2
AY.32	VOC Delta GK (B.1.617.2+AY.*)									2		1
AY.33	VOC Delta GK (B.1.617.2+AY.*)							2	7	2			1
AY.34	VOC Delta GK (B.1.617.2+AY.*)								4				3
AY.34.1	VOC Delta GK (B.1.617.2+AY.*)												2
AY.36	VOC Delta GK (B.1.617.2+AY.*)							1	23	13	1		8
AY.37	VOC Delta GK (B.1.617.2+AY.*)								8	7
AY.38	VOC Delta GK (B.1.617.2+AY.*)							2
AY.39.1	VOC Delta GK (B.1.617.2+AY.*)									1			8
AY.4	VOC Delta GK (B.1.617.2+AY.*)						4	3	13	2	3	12	59
AY.4.2	VOC Delta GK (B.1.617.2+AY.*)												2
AY.4.2.1	VOC Delta GK (B.1.617.2+AY.*)											2	38
AY.4.2.2	VOC Delta GK (B.1.617.2+AY.*)											1	6
AY.4.2.3	VOC Delta GK (B.1.617.2+AY.*)												1
AY.4.4	VOC Delta GK (B.1.617.2+AY.*)								1
AY.4.5	VOC Delta GK (B.1.617.2+AY.*)											1
AY.4.7	VOC Delta GK (B.1.617.2+AY.*)					4
AY.42	VOC Delta GK (B.1.617.2+AY.*)								1				3
AY.43	VOC Delta GK (B.1.617.2+AY.*)							1	7	3		16	58
AY.43.8	VOC Delta GK (B.1.617.2+AY.*)												1
AY.45	VOC Delta GK (B.1.617.2+AY.*)								2
AY.46	VOC Delta GK (B.1.617.2+AY.*)						9		3	1			4
AY.46.1	VOC Delta GK (B.1.617.2+AY.*)								1			1
AY.46.4	VOC Delta GK (B.1.617.2+AY.*)								1
AY.46.6	VOC Delta GK (B.1.617.2+AY.*)								1				1
AY.48	VOC Delta GK (B.1.617.2+AY.*)											1	12
AY.49	VOC Delta GK (B.1.617.2+AY.*)							1
AY.5	VOC Delta GK (B.1.617.2+AY.*)							2	4				2
AY.5.3	VOC Delta GK (B.1.617.2+AY.*)										6
AY.54	VOC Delta GK (B.1.617.2+AY.*)							1	1	2		1
AY.55	VOC Delta GK (B.1.617.2+AY.*)						2
AY.57	VOC Delta GK (B.1.617.2+AY.*)												2
AY.6	VOC Delta GK (B.1.617.2+AY.*)							1	1			3
AY.62	VOC Delta GK (B.1.617.2+AY.*)								1
AY.64	VOC Delta GK (B.1.617.2+AY.*)				1	18	7
AY.65	VOC Delta GK (B.1.617.2+AY.*)						1		2				1
AY.7	VOC Delta GK (B.1.617.2+AY.*)								1
AY.70	VOC Delta GK (B.1.617.2+AY.*)					7	8	1	4
AY.72	VOC Delta GK (B.1.617.2+AY.*)									2
AY.73	VOC Delta GK (B.1.617.2+AY.*)								2
AY.75	VOC Delta GK (B.1.617.2+AY.*)					8	2	8	12	4		50	218
AY.77	VOC Delta GK (B.1.617.2+AY.*)								1				5
AY.80	VOC Delta GK (B.1.617.2+AY.*)									1
AY.82	VOC Delta GK (B.1.617.2+AY.*)								2
AY.83	VOC Delta GK (B.1.617.2+AY.*)											1	1
AY.86	VOC Delta GK (B.1.617.2+AY.*)					9	3	1	2			17	95
AY.88	VOC Delta GK (B.1.617.2+AY.*)							1
AY.9	VOC Delta GK (B.1.617.2+AY.*)											1
AY.9.2	VOC Delta GK (B.1.617.2+AY.*)							1	2	5		1	16
AY.9.2.1	VOC Delta GK (B.1.617.2+AY.*)							2	51	14		3	44
AY.92	VOC Delta GK (B.1.617.2+AY.*)											2
AY.93	VOC Delta GK (B.1.617.2+AY.*)							1	5	18	6	2	4
AY.98	VOC Delta GK (B.1.617.2+AY.*)								9				3
AY.98.1	VOC Delta GK (B.1.617.2+AY.*)								2	1			3
AY.99.2	VOC Delta GK (B.1.617.2+AY.*)											1	1
AZ.1			1	42	201	105	49
B											2
B.1.1		72	20	2
B.1.1.1			1
B.1.1.121		1
B.1.1.157		7	4	17
B.1.1.176		6	1	1	1
B.1.1.216		4	1
B.1.1.222				1
B.1.1.25			1
B.1.1.306			1
B.1.1.312		1
B.1.1.318			5	3			1
B.1.1.329		4
B.1.1.343		6	1		3
B.1.1.348				2
B.1.1.413		1
B.1.1.417		2
B.1.1.487				3
B.1.1.519		7	7	1	1
B.1.160		28	6	18		2
B.1.170			1
B.1.177.54		2
B.1.232		1
B.1.265		1
B.1.311		4		1
B.1.346		34
B.1.349		1
B.1.351	VOC Beta GH/501Y.V2 (B.1.351+B.1.351.2+B.1.351.3)	4		56	130	18	16				2
B.1.351.3	VOC Beta GH/501Y.V2 (B.1.351+B.1.351.2+B.1.351.3)				2
B.1.351.5	VOC Beta GH/501Y.V2 (B.1.351+B.1.351.2+B.1.351.3)				3	1	1
B.1.36		26	4	4
B.1.36.1			1
B.1.36.18		213	55	19	13	1
B.1.36.26		27	1
B.1.36.29		2	2
B.1.36.31		59	20	25	6	3
B.1.36.38		44	16	5	2
B.1.36.8		5	2	1
B.1.369		32	16
B.1.409		2	1
B.1.411			2
B.1.427	VOI Epsilon GH/452R.V1 (B.1.429+B.1.427)	3			1
B.1.429	VOI Epsilon GH/452R.V1 (B.1.429+B.1.427)	1	2	1	1
B.1.438				2
B.1.438.1		120	32	184	42	1
B.1.471			1
B.1.525	VOI Eta G/484K.V3 (B.1.525)	1	4	15	47	25	8				1
B.1.558		1
B.1.564.1		76	27	20
B.1.568			2
B.1.575				1
B.1.577		1
B.1.580													1
B.1.595		1
B.1.617.1	VOI Kappa G/452R.V3 (B.1.617.1)			4	13	3	1
B.1.619					14	19	5
B.1.621	VOI Mu GH (B.1.621+B.1.621.1)								4	4
B.1.626						1
B.1.637		1
B.1.640.1	VUM GH/490R (B.1.640+B.1.640.*)												4
B.1.641												1	4
BA.1.1.1	VOC Omicron GRA (B.1.1.529+BA.*)												3
BA.1.1.10	VOC Omicron GRA (B.1.1.529+BA.*)											2	244
BA.1.1.13	VOC Omicron GRA (B.1.1.529+BA.*)												1
BA.1.1.14	VOC Omicron GRA (B.1.1.529+BA.*)												65
BA.1.1.15	VOC Omicron GRA (B.1.1.529+BA.*)												1
BA.1.1.16	VOC Omicron GRA (B.1.1.529+BA.*)												1
BA.1.1.18	VOC Omicron GRA (B.1.1.529+BA.*)												14
BA.1.1.2	VOC Omicron GRA (B.1.1.529+BA.*)												2
BA.1.12	VOC Omicron GRA (B.1.1.529+BA.*)												1
BA.1.13	VOC Omicron GRA (B.1.1.529+BA.*)												17
BA.1.14	VOC Omicron GRA (B.1.1.529+BA.*)												3
BA.1.15.1	VOC Omicron GRA (B.1.1.529+BA.*)												3
BA.1.16	VOC Omicron GRA (B.1.1.529+BA.*)												1
BA.1.17	VOC Omicron GRA (B.1.1.529+BA.*)											2	384
BA.1.18	VOC Omicron GRA (B.1.1.529+BA.*)												16
BA.1.19	VOC Omicron GRA (B.1.1.529+BA.*)												2
BA.1.20	VOC Omicron GRA (B.1.1.529+BA.*)												22
BA.1.6	VOC Omicron GRA (B.1.1.529+BA.*)												23
BA.2	VOC Omicron GRA (B.1.1.529+BA.*)											5	3
BA.2.10	VOC Omicron GRA (B.1.1.529+BA.*)												1
C.36.1		14	7	12		1
P.1	VOC Gamma GR/501Y.V3 (P.1+P.1.*)			4	10	48	18	2			2	2
P.1.12	VOC Gamma GR/501Y.V3 (P.1+P.1.*)							1
P.1.14	VOC Gamma GR/501Y.V3 (P.1+P.1.*)		3	98	416	181	37	1	3	1
P.1.17	VOC Gamma GR/501Y.V3 (P.1+P.1.*)			2	4		6
P.2	VOI Zeta GR/484K.V2 (P.2)	4	4	12	18		4
R.1				2		8

## Sheet: CENTRAL 
Pango.lineage	Variant	2021-1	2021-2	2021-3	2021-4	2021-5	2021-6	2021-7	2021-8	2021-9	2021-10	2021-11	2021-12
AY.1	VOC Delta GK (B.1.617.2+AY.*)											2
AY.107	VOC Delta GK (B.1.617.2+AY.*)									6	2	1
AY.112	VOC Delta GK (B.1.617.2+AY.*)							1
AY.113	VOC Delta GK (B.1.617.2+AY.*)										1
AY.114	VOC Delta GK (B.1.617.2+AY.*)									1
AY.117	VOC Delta GK (B.1.617.2+AY.*)												5
AY.118	VOC Delta GK (B.1.617.2+AY.*)								6	5		1
AY.119	VOC Delta GK (B.1.617.2+AY.*)								1	7	11	10	3
AY.119.2	VOC Delta GK (B.1.617.2+AY.*)										3	1
AY.122	VOC Delta GK (B.1.617.2+AY.*)							2		3	1		1
AY.127	VOC Delta GK (B.1.617.2+AY.*)										1		2
AY.13	VOC Delta GK (B.1.617.2+AY.*)										2	1
AY.14	VOC Delta GK (B.1.617.2+AY.*)								2
AY.20	VOC Delta GK (B.1.617.2+AY.*)												2
AY.24	VOC Delta GK (B.1.617.2+AY.*)									1
AY.26	VOC Delta GK (B.1.617.2+AY.*)							2	12	6	8
AY.3.1	VOC Delta GK (B.1.617.2+AY.*)								6	14	4	3	1
AY.36	VOC Delta GK (B.1.617.2+AY.*)								1
AY.39.1	VOC Delta GK (B.1.617.2+AY.*)								4	10	5	1
AY.4	VOC Delta GK (B.1.617.2+AY.*)										1	2	3
AY.45	VOC Delta GK (B.1.617.2+AY.*)										7	4
AY.46.4	VOC Delta GK (B.1.617.2+AY.*)									1
AY.51	VOC Delta GK (B.1.617.2+AY.*)										2
AY.62	VOC Delta GK (B.1.617.2+AY.*)							1
AY.75	VOC Delta GK (B.1.617.2+AY.*)								4	14	6	10	4
AY.98.1	VOC Delta GK (B.1.617.2+AY.*)										5	8
B.1.1.116		1
B.1.1.222			1
B.1.1.25		1
B.1.1.348				4
B.1.1.464		2
B.1.1.519			1	3	3
B.1.110.3			1	1	2
B.1.111		3
B.1.160			1
B.1.234		1	2
B.1.240		2	3	1
B.1.298		1
B.1.311		21	3	1
B.1.349		5	1
B.1.351	VOC Beta GH/501Y.V2 (B.1.351+B.1.351.2+B.1.351.3)			2		30
B.1.361		6
B.1.427	VOI Epsilon GH/452R.V1 (B.1.429+B.1.427)	5	2	5	2
B.1.429	VOI Epsilon GH/452R.V1 (B.1.429+B.1.427)	1		3
B.1.517		4	1	1
B.1.568		2
B.1.588		2
B.1.623				1
B.1.637			1	2	3	1	1
BA.1.17	VOC Omicron GRA (B.1.1.529+BA.*)												1
C.36.3						2
P.1	VOC Gamma GR/501Y.V3 (P.1+P.1.*)				2		4
P.1.15	VOC Gamma GR/501Y.V3 (P.1+P.1.*)				1
P.2	VOI Zeta GR/484K.V2 (P.2)	2
Q.4	VOC Alpha GRY (B.1.1.7+Q.*)				1
R.1			22	12	8

## Sheet: FINGER 
Pango.lineage	Variant	2021-1	2021-2	2021-3	2021-4	2021-5	2021-6	2021-7	2021-8	2021-9	2021-10	2021-11	2021-12
AY.1	VOC Delta GK (B.1.617.2+AY.*)											6
AY.107	VOC Delta GK (B.1.617.2+AY.*)								2	4
AY.110	VOC Delta GK (B.1.617.2+AY.*)							6	10	1
AY.112	VOC Delta GK (B.1.617.2+AY.*)								1	3	1
AY.113	VOC Delta GK (B.1.617.2+AY.*)									3
AY.114	VOC Delta GK (B.1.617.2+AY.*)							6	19	7
AY.116.1	VOC Delta GK (B.1.617.2+AY.*)								3				1
AY.117	VOC Delta GK (B.1.617.2+AY.*)									6	7	11	16
AY.118	VOC Delta GK (B.1.617.2+AY.*)							1	8	7	4	4	5
AY.119	VOC Delta GK (B.1.617.2+AY.*)							3	20	24	10	7	3
AY.119.2	VOC Delta GK (B.1.617.2+AY.*)								3	2	2	3	6
AY.120	VOC Delta GK (B.1.617.2+AY.*)								5	3	3	2	1
AY.120.1	VOC Delta GK (B.1.617.2+AY.*)								3
AY.122	VOC Delta GK (B.1.617.2+AY.*)								17	23	6	1	3
AY.126	VOC Delta GK (B.1.617.2+AY.*)									1
AY.127	VOC Delta GK (B.1.617.2+AY.*)									1
AY.129	VOC Delta GK (B.1.617.2+AY.*)											1
AY.13	VOC Delta GK (B.1.617.2+AY.*)							1	3		5	1
AY.14	VOC Delta GK (B.1.617.2+AY.*)							1	8		2
AY.16	VOC Delta GK (B.1.617.2+AY.*)								1
AY.20	VOC Delta GK (B.1.617.2+AY.*)							2	3	9	5	7
AY.26	VOC Delta GK (B.1.617.2+AY.*)						4	30	48	54	10	2
AY.3.1	VOC Delta GK (B.1.617.2+AY.*)							1	22	7	3		1
AY.33	VOC Delta GK (B.1.617.2+AY.*)							2	1	2
AY.34	VOC Delta GK (B.1.617.2+AY.*)										1
AY.34.1	VOC Delta GK (B.1.617.2+AY.*)								1
AY.35	VOC Delta GK (B.1.617.2+AY.*)					1	1		1	1
AY.37	VOC Delta GK (B.1.617.2+AY.*)							1	3	4
AY.39.1	VOC Delta GK (B.1.617.2+AY.*)								3	19	11	10	6
AY.4	VOC Delta GK (B.1.617.2+AY.*)								5	29	5	13	11
AY.43	VOC Delta GK (B.1.617.2+AY.*)							2				1
AY.45	VOC Delta GK (B.1.617.2+AY.*)											1
AY.46	VOC Delta GK (B.1.617.2+AY.*)										1	2
AY.46.2	VOC Delta GK (B.1.617.2+AY.*)										1
AY.5	VOC Delta GK (B.1.617.2+AY.*)										1	2
AY.54	VOC Delta GK (B.1.617.2+AY.*)							6	11	3
AY.56	VOC Delta GK (B.1.617.2+AY.*)						17	2
AY.62	VOC Delta GK (B.1.617.2+AY.*)								1
AY.65	VOC Delta GK (B.1.617.2+AY.*)									1
AY.67	VOC Delta GK (B.1.617.2+AY.*)							1
AY.70	VOC Delta GK (B.1.617.2+AY.*)								2
AY.75	VOC Delta GK (B.1.617.2+AY.*)					4	18	10	24	36	10
AY.77	VOC Delta GK (B.1.617.2+AY.*)								1	1
AY.79	VOC Delta GK (B.1.617.2+AY.*)								1
AY.87	VOC Delta GK (B.1.617.2+AY.*)							1
AY.95	VOC Delta GK (B.1.617.2+AY.*)								1
AY.98.1	VOC Delta GK (B.1.617.2+AY.*)								1	6	1	3
AZ.1						1
B.1.1		4	2	2		4
B.1.1.265		2	1
B.1.1.318					2
B.1.1.345		7	6	2
B.1.1.348				1
B.1.1.434		1
B.1.1.486		3	2
B.1.1.519		2	2	4	5
B.1.110.3			2	1
B.1.111			1
B.1.234		1
B.1.240		2
B.1.243.2										1
B.1.265				3
B.1.311		7	5	14
B.1.349		4	4
B.1.351	VOC Beta GH/501Y.V2 (B.1.351+B.1.351.2+B.1.351.3)					10
B.1.361		16	5	1
B.1.398		1
B.1.400		5	3	1
B.1.409		1
B.1.427	VOI Epsilon GH/452R.V1 (B.1.429+B.1.427)	1	1	18	4
B.1.429	VOI Epsilon GH/452R.V1 (B.1.429+B.1.427)	1	4	1
B.1.517		1
B.1.563			6	1
B.1.575		2	1
B.1.577				1
B.1.582		1	3	10	2
B.1.588		1	7	16
B.1.595		1
B.1.596				1
B.1.621	VOI Mu GH (B.1.621+B.1.621.1)							6
B.1.621.1	VOI Mu GH (B.1.621+B.1.621.1)						2
B.1.625					1
B.1.637			1	11	6	2
BA.1.1.14	VOC Omicron GRA (B.1.1.529+BA.*)												2
BA.1.1.18	VOC Omicron GRA (B.1.1.529+BA.*)												6
BA.1.18	VOC Omicron GRA (B.1.1.529+BA.*)												2
BA.1.19	VOC Omicron GRA (B.1.1.529+BA.*)												1
BA.1.20	VOC Omicron GRA (B.1.1.529+BA.*)												6
BA.1.6	VOC Omicron GRA (B.1.1.529+BA.*)												5
C.31		2		1
C.36		3
C.36.3					1	3
C.37	VOI Lambda GR/452Q.V1 (C.37+C.37.1)								1
P.1	VOC Gamma GR/501Y.V3 (P.1+P.1.*)						8	2
P.1.15	VOC Gamma GR/501Y.V3 (P.1+P.1.*)			1
P.2	VOI Zeta GR/484K.V2 (P.2)	2
Q.3	VOC Alpha GRY (B.1.1.7+Q.*)				1
R.1			2	12
XB								1	1

## Sheet: MOHAWK 
Pango.lineage	Variant	2021-1	2021-2	2021-3	2021-4	2021-5	2021-6	2021-7	2021-8	2021-9	2021-10	2021-11	2021-12
AY.119	VOC Delta GK (B.1.617.2+AY.*)							1	1	2	2	1
AY.122	VOC Delta GK (B.1.617.2+AY.*)										1		1
AY.129	VOC Delta GK (B.1.617.2+AY.*)									1			1
AY.13	VOC Delta GK (B.1.617.2+AY.*)												1
AY.20	VOC Delta GK (B.1.617.2+AY.*)										2
AY.26	VOC Delta GK (B.1.617.2+AY.*)									2	4
AY.3.1	VOC Delta GK (B.1.617.2+AY.*)											1
AY.33	VOC Delta GK (B.1.617.2+AY.*)										2	1
AY.54	VOC Delta GK (B.1.617.2+AY.*)								1				1
AY.75	VOC Delta GK (B.1.617.2+AY.*)								2
B.1.1			2
B.1.1.231		1
B.1.1.434		8
B.1.1.486		1
B.1.1.519				1
B.1.110.3		1
B.1.240		1
B.1.311		25	4
B.1.349		6	1
B.1.361		3
B.1.427	VOI Epsilon GH/452R.V1 (B.1.429+B.1.427)	14		1
B.1.429	VOI Epsilon GH/452R.V1 (B.1.429+B.1.427)			1
B.1.448		1
B.1.478		1
B.1.525	VOI Eta G/484K.V3 (B.1.525)			1
B.1.541		1
B.1.575					1
B.1.582			1
B.1.588			1
B.1.637				2
P.1	VOC Gamma GR/501Y.V3 (P.1+P.1.*)						4
R.1		2	4	12

## Sheet: MID-HUDSON 
Pango.lineage	Variant	2021-1	2021-2	2021-3	2021-4	2021-5	2021-6	2021-7	2021-8	2021-9	2021-10	2021-11	2021-12
A.2.5				1
AY.107	VOC Delta GK (B.1.617.2+AY.*)								2
AY.108	VOC Delta GK (B.1.617.2+AY.*)							1
AY.110	VOC Delta GK (B.1.617.2+AY.*)								2
AY.111	VOC Delta GK (B.1.617.2+AY.*)									3
AY.112	VOC Delta GK (B.1.617.2+AY.*)							1	1			1
AY.113	VOC Delta GK (B.1.617.2+AY.*)								2	3	2	3	2
AY.114	VOC Delta GK (B.1.617.2+AY.*)							1		1			1
AY.116.1	VOC Delta GK (B.1.617.2+AY.*)									1
AY.117	VOC Delta GK (B.1.617.2+AY.*)								1		3	2	2
AY.118	VOC Delta GK (B.1.617.2+AY.*)							1	2	2		4	3
AY.119	VOC Delta GK (B.1.617.2+AY.*)							7	11	4	7	13	2
AY.119.2	VOC Delta GK (B.1.617.2+AY.*)								2			2
AY.120	VOC Delta GK (B.1.617.2+AY.*)								2
AY.120.1	VOC Delta GK (B.1.617.2+AY.*)									1	1
AY.121	VOC Delta GK (B.1.617.2+AY.*)								1	1	1	2
AY.122	VOC Delta GK (B.1.617.2+AY.*)					3		4	16	2	4	6	2
AY.122.1	VOC Delta GK (B.1.617.2+AY.*)									2	2	1	3
AY.122.4	VOC Delta GK (B.1.617.2+AY.*)												5
AY.124	VOC Delta GK (B.1.617.2+AY.*)								1
AY.125	VOC Delta GK (B.1.617.2+AY.*)								2
AY.126	VOC Delta GK (B.1.617.2+AY.*)								1	1
AY.127	VOC Delta GK (B.1.617.2+AY.*)											2
AY.129	VOC Delta GK (B.1.617.2+AY.*)								2	2
AY.13	VOC Delta GK (B.1.617.2+AY.*)						1	2		1	2
AY.14	VOC Delta GK (B.1.617.2+AY.*)							1	4			1
AY.16	VOC Delta GK (B.1.617.2+AY.*)							1
AY.20	VOC Delta GK (B.1.617.2+AY.*)							2	7	4	5	2	5
AY.26	VOC Delta GK (B.1.617.2+AY.*)							10	36	20	6	18	2
AY.27	VOC Delta GK (B.1.617.2+AY.*)												2
AY.3.1	VOC Delta GK (B.1.617.2+AY.*)									1		1	2
AY.3.3	VOC Delta GK (B.1.617.2+AY.*)											3	5
AY.34	VOC Delta GK (B.1.617.2+AY.*)								1		1		2
AY.35	VOC Delta GK (B.1.617.2+AY.*)							1				1
AY.36	VOC Delta GK (B.1.617.2+AY.*)							1	1		1		1
AY.37	VOC Delta GK (B.1.617.2+AY.*)								5
AY.39.1	VOC Delta GK (B.1.617.2+AY.*)								1	1		1	3
AY.39.1.2	VOC Delta GK (B.1.617.2+AY.*)												1
AY.4	VOC Delta GK (B.1.617.2+AY.*)							3		1	2	2	3
AY.4.2	VOC Delta GK (B.1.617.2+AY.*)										2	5
AY.4.7	VOC Delta GK (B.1.617.2+AY.*)								1
AY.43	VOC Delta GK (B.1.617.2+AY.*)								1	2		2	8
AY.45	VOC Delta GK (B.1.617.2+AY.*)									1			1
AY.46.1	VOC Delta GK (B.1.617.2+AY.*)								6	1		1
AY.46.4	VOC Delta GK (B.1.617.2+AY.*)										1	1
AY.46.6	VOC Delta GK (B.1.617.2+AY.*)									1		1
AY.48	VOC Delta GK (B.1.617.2+AY.*)								2
AY.5	VOC Delta GK (B.1.617.2+AY.*)								1		6	1	4
AY.5.3	VOC Delta GK (B.1.617.2+AY.*)												1
AY.54	VOC Delta GK (B.1.617.2+AY.*)								1	2
AY.64	VOC Delta GK (B.1.617.2+AY.*)										1
AY.7.1	VOC Delta GK (B.1.617.2+AY.*)										2
AY.75	VOC Delta GK (B.1.617.2+AY.*)							2	20	4	18	12
AY.88	VOC Delta GK (B.1.617.2+AY.*)								2
AY.9	VOC Delta GK (B.1.617.2+AY.*)								2
AY.9.2	VOC Delta GK (B.1.617.2+AY.*)							2			1
AY.98	VOC Delta GK (B.1.617.2+AY.*)										1		1
AY.98.1	VOC Delta GK (B.1.617.2+AY.*)								4		2	2
B								2
B.1.1		2	2	2
B.1.1.1		1
B.1.1.207		11
B.1.1.220				1
B.1.1.222		4
B.1.1.28			1
B.1.1.316		1
B.1.1.317		1
B.1.1.318				1	2			1
B.1.1.348			1
B.1.1.368		1
B.1.1.39		4
B.1.1.432			1
B.1.1.434		105	10
B.1.1.486		39	8	1
B.1.1.519		4	4	1
B.1.111		8	1	3
B.1.160		1
B.1.177		2
B.1.234		11	1
B.1.240		1	1
B.1.298		1
B.1.311		22	6
B.1.318		2
B.1.349		6
B.1.36.31				1
B.1.36.8		1
B.1.361		5
B.1.362		1
B.1.369		22	6
B.1.375		3
B.1.396		1
B.1.409		47	1
B.1.427	VOI Epsilon GH/452R.V1 (B.1.429+B.1.427)	3	1	5
B.1.429	VOI Epsilon GH/452R.V1 (B.1.429+B.1.427)	2	5	2
B.1.433		1
B.1.478		4
B.1.517		35	13
B.1.517.1		1
B.1.525	VOI Eta G/484K.V3 (B.1.525)		1
B.1.543		1
B.1.544		1	3
B.1.563		1
B.1.568				1
B.1.575		13	4	5	1
B.1.582		1	2
B.1.588		14	1	1	2
B.1.596		4
B.1.604				2
B.1.609		1
B.1.621	VOI Mu GH (B.1.621+B.1.621.1)							6	2	2
B.1.621.1	VOI Mu GH (B.1.621+B.1.621.1)					1		1
B.1.627					1
B.1.630								2
B.1.632								1
B.1.637		6	11	39	19	4
BA.1.1.14	VOC Omicron GRA (B.1.1.529+BA.*)												7
BA.1.1.15	VOC Omicron GRA (B.1.1.529+BA.*)												1
BA.1.1.16	VOC Omicron GRA (B.1.1.529+BA.*)												1
BA.1.1.18	VOC Omicron GRA (B.1.1.529+BA.*)												16
BA.1.1.2	VOC Omicron GRA (B.1.1.529+BA.*)												2
BA.1.13	VOC Omicron GRA (B.1.1.529+BA.*)												7
BA.1.17	VOC Omicron GRA (B.1.1.529+BA.*)												4
BA.1.18	VOC Omicron GRA (B.1.1.529+BA.*)												8
BA.1.6	VOC Omicron GRA (B.1.1.529+BA.*)												2
BA.1.20													6
BA.1.21													1
C.2.1			1
C.36			1
C.36.3.1					2
C.37	VOI Lambda GR/452Q.V1 (C.37+C.37.1)				4	2			1
C.37.1	VOI Lambda GR/452Q.V1 (C.37+C.37.1)				2			1
P.1	VOC Gamma GR/501Y.V3 (P.1+P.1.*)				18	12	12	6
P.1.10	VOC Gamma GR/501Y.V3 (P.1+P.1.*)				1	1	2	1
P.1.14	VOC Gamma GR/501Y.V3 (P.1+P.1.*)						1
P.2	VOI Zeta GR/484K.V2 (P.2)	10
Q.1	VOC Alpha GRY (B.1.1.7+Q.*)					1
Q.4	VOC Alpha GRY (B.1.1.7+Q.*)				1
R.1		2	4		2
XB						9

## Sheet: SOUTHERN 
Pango.lineage	Variant	2021-1	2021-2	2021-3	2021-4	2021-5	2021-6	2021-7	2021-8	2021-9	2021-10	2021-11	2021-12
AY.107	VOC Delta GK (B.1.617.2+AY.*)									1
AY.11	VOC Delta GK (B.1.617.2+AY.*)									1
AY.117	VOC Delta GK (B.1.617.2+AY.*)										1	1
AY.118	VOC Delta GK (B.1.617.2+AY.*)											1	2
AY.119	VOC Delta GK (B.1.617.2+AY.*)										2	3
AY.120	VOC Delta GK (B.1.617.2+AY.*)								1
AY.122	VOC Delta GK (B.1.617.2+AY.*)										1	1
AY.14	VOC Delta GK (B.1.617.2+AY.*)											1
AY.20	VOC Delta GK (B.1.617.2+AY.*)								2	2
AY.26	VOC Delta GK (B.1.617.2+AY.*)									2
AY.3.1	VOC Delta GK (B.1.617.2+AY.*)										1
AY.39.1	VOC Delta GK (B.1.617.2+AY.*)									3		2
AY.4	VOC Delta GK (B.1.617.2+AY.*)									1			1
AY.46.4	VOC Delta GK (B.1.617.2+AY.*)										1	1
AY.5	VOC Delta GK (B.1.617.2+AY.*)										5	1	1
AY.52	VOC Delta GK (B.1.617.2+AY.*)							1
AY.54	VOC Delta GK (B.1.617.2+AY.*)												1
AY.56	VOC Delta GK (B.1.617.2+AY.*)						1
AY.75	VOC Delta GK (B.1.617.2+AY.*)									4
B.1.1		2
B.1.1.265		3	2
B.1.1.318					1
B.1.1.486			1
B.1.1.519						1
B.1.110.3			2	1
B.1.234				1
B.1.240		1
B.1.311		9	3	1		1
B.1.340				1
B.1.349		1	1
B.1.409		2
B.1.427	VOI Epsilon GH/452R.V1 (B.1.429+B.1.427)		3	2
B.1.429	VOI Epsilon GH/452R.V1 (B.1.429+B.1.427)	1	4	2	2	7
B.1.575			1	6
B.1.577		1
B.1.621	VOI Mu GH (B.1.621+B.1.621.1)								2
B.1.623					1
B.1.637		1	3	14	8
BA.1.14	VOC Omicron GRA (B.1.1.529+BA.*)												4
C.36.3							2
P.1	VOC Gamma GR/501Y.V3 (P.1+P.1.*)				2	6	2
R.1			2

[truncated: 2 more sheets: NORTH , CAPITAL ]
