# Supplementary material for: Genomic profiling and spatial SEIR modeling of COVID-19 transmission in Western New York
Source: Front Microbiol. 2024 Sep 27;15:1416580. doi: 10.3389/fmicb.2024.1416580 (PMC11468862; doi:10.3389/fmicb.2024.1416580)
Supplement: Supplementary file 4 [file Table_4.XLSX]

## Sheet: Sheet1
Region	Population	month	Variant	Clade	Pango.lineage	n	PlotName
Capital Region	1083201	2022-01-02	Former VOC Delta GK (B.1.617.2+AY.*) first detected in India	GK	AY.100	2	Other
Capital Region	1083201	2022-01-09	Former VOC Delta GK (B.1.617.2+AY.*) first detected in India	GK	AY.100	1	Other
Capital Region	1083201	2022-01-23	Former VOC Delta GK (B.1.617.2+AY.*) first detected in India	GK	AY.100	2	Other
Central New York	777706	2022-01-02	Former VOC Delta GK (B.1.617.2+AY.*) first detected in India	GK	AY.100	1	Other
Finger Lakes	1205380	2022-01-02	Former VOC Delta GK (B.1.617.2+AY.*) first detected in India	GK	AY.100	1	Other
Finger Lakes	1205380	2022-01-09	Former VOC Delta GK (B.1.617.2+AY.*) first detected in India	GK	AY.100	1	Other
Long Island	2840341	2022-01-09	Former VOC Delta GK (B.1.617.2+AY.*) first detected in India	GK	AY.100	1	Other
Mid-Hudson	2319719	2022-01-09	Former VOC Delta GK (B.1.617.2+AY.*) first detected in India	GK	AY.100	1	Other
New York City	8419316	2022-01-02	Former VOC Delta GK (B.1.617.2+AY.*) first detected in India	GK	AY.100	8	Other
New York City	8419316	2022-01-09	Former VOC Delta GK (B.1.617.2+AY.*) first detected in India	GK	AY.100	2	Other
New York City	8419316	2022-01-16	Former VOC Delta GK (B.1.617.2+AY.*) first detected in India	GK	AY.100	5	Other
New York City	8419316	2022-01-23	Former VOC Delta GK (B.1.617.2+AY.*) first detected in India	GK	AY.100	7	Other
New York City	8419316	2022-02-13	Former VOC Delta GK (B.1.617.2+AY.*) first detected in India	GK	AY.100	1	Other
North Country	421361	2022-01-02	Former VOC Delta GK (B.1.617.2+AY.*) first detected in India	GK	AY.100	1	Other
Southern Tier	636657	2022-01-09	Former VOC Delta GK (B.1.617.2+AY.*) first detected in India	GK	AY.100	1	Other
Western New York	1382480	2022-01-02	Former VOC Delta GK (B.1.617.2+AY.*) first detected in India	GK	AY.100	1	Other
Western New York	1382480	2022-01-09	Former VOC Delta GK (B.1.617.2+AY.*) first detected in India	GK	AY.100	1	Other
Western New York	1382480	2022-01-16	Former VOC Delta GK (B.1.617.2+AY.*) first detected in India	GK	AY.100	2	Other
Ontario CA	14570000	2022-01-02	Former VOC Delta GK (B.1.617.2+AY.*) first detected in India	GK	AY.100	1	Other
Capital Region	1083201	2022-01-02	Former VOC Delta GK (B.1.617.2+AY.*) first detected in India	GK	AY.103	9	Other
Finger Lakes	1205380	2022-01-02	Former VOC Delta GK (B.1.617.2+AY.*) first detected in India	GK	AY.103	2	Other
Finger Lakes	1205380	2022-01-09	Former VOC Delta GK (B.1.617.2+AY.*) first detected in India	GK	AY.103	7	Other
Finger Lakes	1205380	2022-09-25	Former VOC Delta GK (B.1.617.2+AY.*) first detected in India	GK	AY.103	2	Other
Mid-Hudson	2319719	2022-01-02	Former VOC Delta GK (B.1.617.2+AY.*) first detected in India	GK	AY.103	5	Other
Mid-Hudson	2319719	2022-01-16	Former VOC Delta GK (B.1.617.2+AY.*) first detected in India	GK	AY.103	1	Other
Mohawk Valley	486158	2022-01-02	Former VOC Delta GK (B.1.617.2+AY.*) first detected in India	GK	AY.103	1	Other
New York City	8419316	2022-01-02	Former VOC Delta GK (B.1.617.2+AY.*) first detected in India	GK	AY.103	32	Other
New York City	8419316	2022-01-09	Former VOC Delta GK (B.1.617.2+AY.*) first detected in India	GK	AY.103	19	Other
New York City	8419316	2022-01-16	Former VOC Delta GK (B.1.617.2+AY.*) first detected in India	GK	AY.103	5	Other
New York City	8419316	2022-01-23	Former VOC Delta GK (B.1.617.2+AY.*) first detected in India	GK	AY.103	4	Other
New York City	8419316	2022-01-30	Former VOC Delta GK (B.1.617.2+AY.*) first detected in India	GK	AY.103	4	Other
New York City	8419316	2022-02-06	Former VOC Delta GK (B.1.617.2+AY.*) first detected in India	GK	AY.103	1	Other
New York City	8419316	2022-02-13	Former VOC Delta GK (B.1.617.2+AY.*) first detected in India	GK	AY.103	1	Other
New York City	8419316	2022-02-20	Former VOC Delta GK (B.1.617.2+AY.*) first detected in India	GK	AY.103	3	Other
New York City	8419316	2022-02-27	Former VOC Delta GK (B.1.617.2+AY.*) first detected in India	GK	AY.103	3	Other
New York City	8419316	2022-03-06	Former VOC Delta GK (B.1.617.2+AY.*) first detected in India	GK	AY.103	2	Other
New York City	8419316	2022-03-13	Former VOC Delta GK (B.1.617.2+AY.*) first detected in India	GK	AY.103	1	Other
New York City	8419316	2022-03-20	Former VOC Delta GK (B.1.617.2+AY.*) first detected in India	GK	AY.103	2	Other
New York City	8419316	2022-04-24	Former VOC Delta GK (B.1.617.2+AY.*) first detected in India	GK	AY.103	1	Other
New York City	8419316	2022-05-08	Former VOC Delta GK (B.1.617.2+AY.*) first detected in India	GK	AY.103	1	Other
New York City	8419316	2022-05-15	Former VOC Delta GK (B.1.617.2+AY.*) first detected in India	GK	AY.103	1	Other
North Country	421361	2022-01-02	Former VOC Delta GK (B.1.617.2+AY.*) first detected in India	GK	AY.103	1	Other
North Country	421361	2022-01-30	Former VOC Delta GK (B.1.617.2+AY.*) first detected in India	GK	AY.103	1	Other
Southern Tier	636657	2022-01-02	Former VOC Delta GK (B.1.617.2+AY.*) first detected in India	GK	AY.103	1	Other
Southern Tier	636657	2022-01-09	Former VOC Delta GK (B.1.617.2+AY.*) first detected in India	GK	AY.103	3	Other
Western New York	1382480	2022-01-02	Former VOC Delta GK (B.1.617.2+AY.*) first detected in India	GK	AY.103	24	Other
Western New York	1382480	2022-01-09	Former VOC Delta GK (B.1.617.2+AY.*) first detected in India	GK	AY.103	12	Other
Western New York	1382480	2022-01-16	Former VOC Delta GK (B.1.617.2+AY.*) first detected in India	GK	AY.103	2	Other
Ontario CA	14570000	2022-01-02	Former VOC Delta GK (B.1.617.2+AY.*) first detected in India	GK	AY.103	5	Other
Ontario CA	14570000	2022-01-09	Former VOC Delta GK (B.1.617.2+AY.*) first detected in India	GK	AY.103	6	Other
Ontario CA	14570000	2022-01-16	Former VOC Delta GK (B.1.617.2+AY.*) first detected in India	GK	AY.103	2	Other
Ontario CA	14570000	2022-01-23	Former VOC Delta GK (B.1.617.2+AY.*) first detected in India	GK	AY.103	1	Other
Ontario CA	14570000	2022-01-30	Former VOC Delta GK (B.1.617.2+AY.*) first detected in India	GK	AY.103	2	Other
Ontario CA	14570000	2022-04-17	Former VOC Delta GK (B.1.617.2+AY.*) first detected in India	GK	AY.103	3	Other
Ontario CA	14570000	2022-04-24	Former VOC Delta GK (B.1.617.2+AY.*) first detected in India	GK	AY.103	2	Other
New York City	8419316	2022-01-09	Former VOC Delta GK (B.1.617.2+AY.*) first detected in India	GK	AY.107	1	Other
New York City	8419316	2022-03-20	Former VOC Delta GK (B.1.617.2+AY.*) first detected in India	GK	AY.109	1	Other
Finger Lakes	1205380	2022-01-09	Former VOC Delta GK (B.1.617.2+AY.*) first detected in India	GK	AY.110	1	Other
New York City	8419316	2022-01-09	Former VOC Delta GK (B.1.617.2+AY.*) first detected in India	GK	AY.112	1	Other
New York City	8419316	2022-01-02	Former VOC Delta GK (B.1.617.2+AY.*) first detected in India	GK	AY.116.1	1	Other
Central New York	777706	2022-01-09	Former VOC Delta GK (B.1.617.2+AY.*) first detected in India	GK	AY.117	1	Other
Finger Lakes	1205380	2022-01-16	Former VOC Delta GK (B.1.617.2+AY.*) first detected in India	GK	AY.117	1	Other
New York City	8419316	2022-01-02	Former VOC Delta GK (B.1.617.2+AY.*) first detected in India	GK	AY.117	1	Other
Western New York	1382480	2022-01-02	Former VOC Delta GK (B.1.617.2+AY.*) first detected in India	GK	AY.117	1	Other
Finger Lakes	1205380	2022-01-09	Former VOC Delta GK (B.1.617.2+AY.*) first detected in India	GK	AY.118	1	Other
New York City	8419316	2022-01-09	Former VOC Delta GK (B.1.617.2+AY.*) first detected in India	GK	AY.118	1	Other
Southern Tier	636657	2022-01-09	Former VOC Delta GK (B.1.617.2+AY.*) first detected in India	GK	AY.118	1	Other
Western New York	1382480	2022-01-16	Former VOC Delta GK (B.1.617.2+AY.*) first detected in India	GK	AY.118	1	Other
Capital Region	1083201	2022-01-02	Former VOC Delta GK (B.1.617.2+AY.*) first detected in India	GK	AY.119	1	Other
Capital Region	1083201	2022-02-20	Former VOC Delta GK (B.1.617.2+AY.*) first detected in India	GK	AY.119	1	Other
Capital Region	1083201	2022-02-27	Former VOC Delta GK (B.1.617.2+AY.*) first detected in India	GK	AY.119	1	Other
Capital Region	1083201	2022-03-13	Former VOC Delta GK (B.1.617.2+AY.*) first detected in India	GK	AY.119	1	Other
Capital Region	1083201	2022-04-17	Former VOC Delta GK (B.1.617.2+AY.*) first detected in India	GK	AY.119	1	Other
Capital Region	1083201	2022-04-24	Former VOC Delta GK (B.1.617.2+AY.*) first detected in India	GK	AY.119	1	Other
Finger Lakes	1205380	2022-01-09	Former VOC Delta GK (B.1.617.2+AY.*) first detected in India	GK	AY.119	1	Other
Finger Lakes	1205380	2022-09-25	Former VOC Delta GK (B.1.617.2+AY.*) first detected in India	GK	AY.119	1	Other
New York City	8419316	2022-01-02	Former VOC Delta GK (B.1.617.2+AY.*) first detected in India	GK	AY.119	6	Other
Southern Tier	636657	2022-01-02	Former VOC Delta GK (B.1.617.2+AY.*) first detected in India	GK	AY.119	1	Other
Western New York	1382480	2022-01-02	Former VOC Delta GK (B.1.617.2+AY.*) first detected in India	GK	AY.119	2	Other
Ontario CA	14570000	2022-01-09	Former VOC Delta GK (B.1.617.2+AY.*) first detected in India	GK	AY.119	1	Other
New York City	8419316	2022-01-30	Former VOC Delta GK (B.1.617.2+AY.*) first detected in India	GK	AY.119.2	1	Other
Ontario CA	14570000	2022-01-02	Former VOC Delta GK (B.1.617.2+AY.*) first detected in India	GK	AY.119.2	1	Other
New York City	8419316	2022-01-02	Former VOC Delta GK (B.1.617.2+AY.*) first detected in India	GK	AY.120.2	1	Other
New York City	8419316	2022-01-02	Former VOC Delta GK (B.1.617.2+AY.*) first detected in India	GK	AY.121	3	Other
Ontario CA	14570000	2022-01-02	Former VOC Delta GK (B.1.617.2+AY.*) first detected in India	GK	AY.121.1	1	Other
Ontario CA	14570000	2022-01-09	Former VOC Delta GK (B.1.617.2+AY.*) first detected in India	GK	AY.121.1	1	Other
Finger Lakes	1205380	2022-01-02	Former VOC Delta GK (B.1.617.2+AY.*) first detected in India	GK	AY.122	1	Other
Finger Lakes	1205380	2022-01-09	Former VOC Delta GK (B.1.617.2+AY.*) first detected in India	GK	AY.122	1	Other
Western New York	1382480	2022-01-09	Former VOC Delta GK (B.1.617.2+AY.*) first detected in India	GK	AY.122	1	Other
Ontario CA	14570000	2022-01-02	Former VOC Delta GK (B.1.617.2+AY.*) first detected in India	GK	AY.122	2	Other
Ontario CA	14570000	2022-01-09	Former VOC Delta GK (B.1.617.2+AY.*) first detected in India	GK	AY.122	1	Other
Ontario CA	14570000	2022-01-16	Former VOC Delta GK (B.1.617.2+AY.*) first detected in India	GK	AY.122	2	Other
Ontario CA	14570000	2022-01-23	Former VOC Delta GK (B.1.617.2+AY.*) first detected in India	GK	AY.122	1	Other
Mid-Hudson	2319719	2022-01-02	Former VOC Delta GK (B.1.617.2+AY.*) first detected in India	GK	AY.122.4	3	Other
Finger Lakes	1205380	2022-01-09	Former VOC Delta GK (B.1.617.2+AY.*) first detected in India	GK	AY.127	1	Other
Mid-Hudson	2319719	2022-01-02	Former VOC Delta GK (B.1.617.2+AY.*) first detected in India	GK	AY.127	1	Other
New York City	8419316	2022-01-02	Former VOC Delta GK (B.1.617.2+AY.*) first detected in India	GK	AY.127	2	Other
New York City	8419316	2022-01-16	Former VOC Delta GK (B.1.617.2+AY.*) first detected in India	GK	AY.127	1	Other
Ontario CA	14570000	2022-01-02	Former VOC Delta GK (B.1.617.2+AY.*) first detected in India	GK	AY.127	1	Other
Ontario CA	14570000	2022-01-09	Former VOC Delta GK (B.1.617.2+AY.*) first detected in India	GK	AY.127	1	Other
New York City	8419316	2022-01-09	Former VOC Delta GK (B.1.617.2+AY.*) first detected in India	GK	AY.129	1	Other
Ontario CA	14570000	2022-01-02	Former VOC Delta GK (B.1.617.2+AY.*) first detected in India	GK	AY.131	1	Other
Mid-Hudson	2319719	2022-01-09	Former VOC Delta GK (B.1.617.2+AY.*) first detected in India	GK	AY.20	1	Other
New York City	8419316	2022-03-27	Former VOC Delta GK (B.1.617.2+AY.*) first detected in India	GK	AY.20	1	Other
New York City	8419316	2022-01-02	Former VOC Delta GK (B.1.617.2+AY.*) first detected in India	GK	AY.23	1	Other
Capital Region	1083201	2022-01-02	Former VOC Delta GK (B.1.617.2+AY.*) first detected in India	GK	AY.25	3	Other
Capital Region	1083201	2022-01-09	Former VOC Delta GK (B.1.617.2+AY.*) first detected in India	GK	AY.25	2	Other
Finger Lakes	1205380	2022-01-09	Former VOC Delta GK (B.1.617.2+AY.*) first detected in India	GK	AY.25	1	Other
Finger Lakes	1205380	2022-09-25	Former VOC Delta GK (B.1.617.2+AY.*) first detected in India	GK	AY.25	1	Other
Mid-Hudson	2319719	2022-01-02	Former VOC Delta GK (B.1.617.2+AY.*) first detected in India	GK	AY.25	1	Other
New York City	8419316	2022-01-02	Former VOC Delta GK (B.1.617.2+AY.*) first detected in India	GK	AY.25	6	Other
New York City	8419316	2022-01-09	Former VOC Delta GK (B.1.617.2+AY.*) first detected in India	GK	AY.25	2	Other
Southern Tier	636657	2022-01-02	Former VOC Delta GK (B.1.617.2+AY.*) first detected in India	GK	AY.25	1	Other
Western New York	1382480	2022-01-02	Former VOC Delta GK (B.1.617.2+AY.*) first detected in India	GK	AY.25	3	Other
Western New York	1382480	2022-01-09	Former VOC Delta GK (B.1.617.2+AY.*) first detected in India	GK	AY.25	4	Other
Western New York	1382480	2022-01-23	Former VOC Delta GK (B.1.617.2+AY.*) first detected in India	GK	AY.25	1	Other
Western New York	1382480	2022-01-30	Former VOC Delta GK (B.1.617.2+AY.*) first detected in India	GK	AY.25	1	Other
Western New York	1382480	2022-02-13	Former VOC Delta GK (B.1.617.2+AY.*) first detected in India	GK	AY.25	1	Other
Western New York	1382480	2022-03-06	Former VOC Delta GK (B.1.617.2+AY.*) first detected in India	GK	AY.25	1	Other
Capital Region	1083201	2022-01-02	Former VOC Delta GK (B.1.617.2+AY.*) first detected in India	GK	AY.25.1	2	Other
Capital Region	1083201	2022-01-09	Former VOC Delta GK (B.1.617.2+AY.*) first detected in India	GK	AY.25.1	3	Other
Capital Region	1083201	2022-01-16	Former VOC Delta GK (B.1.617.2+AY.*) first detected in India	GK	AY.25.1	1	Other
Central New York	777706	2022-01-02	Former VOC Delta GK (B.1.617.2+AY.*) first detected in India	GK	AY.25.1	1	Other
Finger Lakes	1205380	2022-01-02	Former VOC Delta GK (B.1.617.2+AY.*) first detected in India	GK	AY.25.1	1	Other
Finger Lakes	1205380	2022-01-09	Former VOC Delta GK (B.1.617.2+AY.*) first detected in India	GK	AY.25.1	2	Other
Mid-Hudson	2319719	2022-01-02	Former VOC Delta GK (B.1.617.2+AY.*) first detected in India	GK	AY.25.1	3	Other
Mid-Hudson	2319719	2022-01-09	Former VOC Delta GK (B.1.617.2+AY.*) first detected in India	GK	AY.25.1	1	Other
New York City	8419316	2022-01-02	Former VOC Delta GK (B.1.617.2+AY.*) first detected in India	GK	AY.25.1	7	Other
New York City	8419316	2022-01-09	Former VOC Delta GK (B.1.617.2+AY.*) first detected in India	GK	AY.25.1	2	Other
New York City	8419316	2022-01-16	Former VOC Delta GK (B.1.617.2+AY.*) first detected in India	GK	AY.25.1	2	Other
Southern Tier	636657	2022-01-02	Former VOC Delta GK (B.1.617.2+AY.*) first detected in India	GK	AY.25.1	1	Other
Southern Tier	636657	2022-01-09	Former VOC Delta GK (B.1.617.2+AY.*) first detected in India	GK	AY.25.1	1	Other
Southern Tier	636657	2022-09-25	Former VOC Delta GK (B.1.617.2+AY.*) first detected in India	GK	AY.25.1	1	Other
Western New York	1382480	2022-01-02	Former VOC Delta GK (B.1.617.2+AY.*) first detected in India	GK	AY.25.1	1	Other
Ontario CA	14570000	2022-01-02	Former VOC Delta GK (B.1.617.2+AY.*) first detected in India	GK	AY.25.1	3	Other
Ontario CA	14570000	2022-01-09	Former VOC Delta GK (B.1.617.2+AY.*) first detected in India	GK	AY.25.1	5	Other
Ontario CA	14570000	2022-01-16	Former VOC Delta GK (B.1.617.2+AY.*) first detected in India	GK	AY.25.1	1	Other
Ontario CA	14570000	2022-01-23	Former VOC Delta GK (B.1.617.2+AY.*) first detected in India	GK	AY.25.1	1	Other
Ontario CA	14570000	2022-02-27	Former VOC Delta GK (B.1.617.2+AY.*) first detected in India	GK	AY.25.1	1	Other
Ontario CA	14570000	2022-04-24	Former VOC Delta GK (B.1.617.2+AY.*) first detected in India	GK	AY.25.1	1	Other
Ontario CA	14570000	2022-01-02	Former VOC Delta GK (B.1.617.2+AY.*) first detected in India	GK	AY.25.3	21	Other
Ontario CA	14570000	2022-01-09	Former VOC Delta GK (B.1.617.2+AY.*) first detected in India	GK	AY.25.3	8	Other
Ontario CA	14570000	2022-01-16	Former VOC Delta GK (B.1.617.2+AY.*) first detected in India	GK	AY.25.3	9	Other
Ontario CA	14570000	2022-01-23	Former VOC Delta GK (B.1.617.2+AY.*) first detected in India	GK	AY.25.3	2	Other
Ontario CA	14570000	2022-02-06	Former VOC Delta GK (B.1.617.2+AY.*) first detected in India	GK	AY.25.3	1	Other
Ontario CA	14570000	2022-02-13	Former VOC Delta GK (B.1.617.2+AY.*) first detected in India	GK	AY.25.3	3	Other
Ontario CA	14570000	2022-06-19	Former VOC Delta GK (B.1.617.2+AY.*) first detected in India	GK	AY.25.3	3	Other
Ontario CA	14570000	2022-01-09	Former VOC Delta GK (B.1.617.2+AY.*) first detected in India	GK	AY.27	1	Other
Ontario CA	14570000	2022-01-16	Former VOC Delta GK (B.1.617.2+AY.*) first detected in India	GK	AY.27	1	Other
Ontario CA	14570000	2022-01-30	Former VOC Delta GK (B.1.617.2+AY.*) first detected in India	GK	AY.27	1	Other
Ontario CA	14570000	2022-04-24	Former VOC Delta GK (B.1.617.2+AY.*) first detected in India	GK	AY.27	1	Other
Capital Region	1083201	2022-01-02	Former VOC Delta GK (B.1.617.2+AY.*) first detected in India	GK	AY.3	2	Other
Capital Region	1083201	2022-01-09	Former VOC Delta GK (B.1.617.2+AY.*) first detected in India	GK	AY.3	1	Other
Capital Region	1083201	2022-01-23	Former VOC Delta GK (B.1.617.2+AY.*) first detected in India	GK	AY.3	1	Other
Capital Region	1083201	2022-02-06	Former VOC Delta GK (B.1.617.2+AY.*) first detected in India	GK	AY.3	1	Other
Finger Lakes	1205380	2022-01-09	Former VOC Delta GK (B.1.617.2+AY.*) first detected in India	GK	AY.3	3	Other
Finger Lakes	1205380	2022-01-16	Former VOC Delta GK (B.1.617.2+AY.*) first detected in India	GK	AY.3	1	Other
Finger Lakes	1205380	2022-02-13	Former VOC Delta GK (B.1.617.2+AY.*) first detected in India	GK	AY.3	1	Other
Finger Lakes	1205380	2022-09-25	Former VOC Delta GK (B.1.617.2+AY.*) first detected in India	GK	AY.3	1	Other
Mid-Hudson	2319719	2022-01-02	Former VOC Delta GK (B.1.617.2+AY.*) first detected in India	GK	AY.3	1	Other
Mohawk Valley	486158	2022-01-16	Former VOC Delta GK (B.1.617.2+AY.*) first detected in India	GK	AY.3	1	Other
New York City	8419316	2022-01-02	Former VOC Delta GK (B.1.617.2+AY.*) first detected in India	GK	AY.3	9	Other
New York City	8419316	2022-01-09	Former VOC Delta GK (B.1.617.2+AY.*) first detected in India	GK	AY.3	8	Other
New York City	8419316	2022-01-16	Former VOC Delta GK (B.1.617.2+AY.*) first detected in India	GK	AY.3	2	Other
New York City	8419316	2022-01-23	Former VOC Delta GK (B.1.617.2+AY.*) first detected in India	GK	AY.3	1	Other
New York City	8419316	2022-01-30	Former VOC Delta GK (B.1.617.2+AY.*) first detected in India	GK	AY.3	1	Other
New York City	8419316	2022-02-06	Former VOC Delta GK (B.1.617.2+AY.*) first detected in India	GK	AY.3	2	Other
New York City	8419316	2022-02-20	Former VOC Delta GK (B.1.617.2+AY.*) first detected in India	GK	AY.3	1	Other
New York City	8419316	2022-02-27	Former VOC Delta GK (B.1.617.2+AY.*) first detected in India	GK	AY.3	1	Other
Southern Tier	636657	2022-01-02	Former VOC Delta GK (B.1.617.2+AY.*) first detected in India	GK	AY.3	3	Other
Western New York	1382480	2022-01-02	Former VOC Delta GK (B.1.617.2+AY.*) first detected in India	GK	AY.3	3	Other
Western New York	1382480	2022-01-09	Former VOC Delta GK (B.1.617.2+AY.*) first detected in India	GK	AY.3	3	Other
Ontario CA	14570000	2022-01-02	Former VOC Delta GK (B.1.617.2+AY.*) first detected in India	GK	AY.3	2	Other
Ontario CA	14570000	2022-01-23	Former VOC Delta GK (B.1.617.2+AY.*) first detected in India	GK	AY.3	3	Other
Ontario CA	14570000	2022-02-13	Former VOC Delta GK (B.1.617.2+AY.*) first detected in India	GK	AY.3	1	Other
Finger Lakes	1205380	2022-01-02	Former VOC Delta GK (B.1.617.2+AY.*) first detected in India	GK	AY.3.1	1	Other
Finger Lakes	1205380	2022-01-09	Former VOC Delta GK (B.1.617.2+AY.*) first detected in India	GK	AY.3.1	2	Other
Capital Region	1083201	2022-01-02	Former VOC Delta GK (B.1.617.2+AY.*) first detected in India	GK	AY.3.3	1	Other
New York City	8419316	2022-01-09	Former VOC Delta GK (B.1.617.2+AY.*) first detected in India	GK	AY.3.3	1	Other
New York City	8419316	2022-01-23	Former VOC Delta GK (B.1.617.2+AY.*) first detected in India	GK	AY.3.3	1	Other
New York City	8419316	2022-01-02	Former VOC Delta GK (B.1.617.2+AY.*) first detected in India	GK	AY.33	1	Other
New York City	8419316	2022-01-02	Former VOC Delta GK (B.1.617.2+AY.*) first detected in India	GK	AY.34	1	Other
Mid-Hudson	2319719	2022-01-02	Former VOC Delta GK (B.1.617.2+AY.*) first detected in India	GK	AY.36	1	Other
Finger Lakes	1205380	2022-01-02	Former VOC Delta GK (B.1.617.2+AY.*) first detected in India	GK	AY.39	1	Other
Mid-Hudson	2319719	2022-01-02	Former VOC Delta GK (B.1.617.2+AY.*) first detected in India	GK	AY.39	2	Other
Mid-Hudson	2319719	2022-02-27	Former VOC Delta GK (B.1.617.2+AY.*) first detected in India	GK	AY.39	1	Other
New York City	8419316	2022-01-02	Former VOC Delta GK (B.1.617.2+AY.*) first detected in India	GK	AY.39	12	Other
New York City	8419316	2022-01-09	Former VOC Delta GK (B.1.617.2+AY.*) first detected in India	GK	AY.39	3	Other
New York City	8419316	2022-01-16	Former VOC Delta GK (B.1.617.2+AY.*) first detected in India	GK	AY.39	2	Other
New York City	8419316	2022-01-23	Former VOC Delta GK (B.1.617.2+AY.*) first detected in India	GK	AY.39	1	Other
New York City	8419316	2022-01-30	Former VOC Delta GK (B.1.617.2+AY.*) first detected in India	GK	AY.39	1	Other
Western New York	1382480	2022-01-02	Former VOC Delta GK (B.1.617.2+AY.*) first detected in India	GK	AY.39	2	Other
Ontario CA	14570000	2022-01-09	Former VOC Delta GK (B.1.617.2+AY.*) first detected in India	GK	AY.39	3	Other
Ontario CA	14570000	2022-01-30	Former VOC Delta GK (B.1.617.2+AY.*) first detected in India	GK	AY.39	1	Other
Finger Lakes	1205380	2022-01-02	Former VOC Delta GK (B.1.617.2+AY.*) first detected in India	GK	AY.39.1	1	Other
Finger Lakes	1205380	2022-01-09	Former VOC Delta GK (B.1.617.2+AY.*) first detected in India	GK	AY.39.1	1	Other
Finger Lakes	1205380	2022-09-25	Former VOC Delta GK (B.1.617.2+AY.*) first detected in India	GK	AY.39.1	1	Other
Mid-Hudson	2319719	2022-01-02	Former VOC Delta GK (B.1.617.2+AY.*) first detected in India	GK	AY.39.1	1	Other
Mid-Hudson	2319719	2022-01-09	Former VOC Delta GK (B.1.617.2+AY.*) first detected in India	GK	AY.39.1	1	Other
New York City	8419316	2022-01-02	Former VOC Delta GK (B.1.617.2+AY.*) first detected in India	GK	AY.39.1	1	Other
North Country	421361	2022-01-30	Former VOC Delta GK (B.1.617.2+AY.*) first detected in India	GK	AY.39.1	1	Other
Western New York	1382480	2022-01-09	Former VOC Delta GK (B.1.617.2+AY.*) first detected in India	GK	AY.39.1	1	Other
New York City	8419316	2022-01-23	Former VOC Delta GK (B.1.617.2+AY.*) first detected in India	GK	AY.39.2	1	Other
Finger Lakes	1205380	2022-01-30	Former VOC Delta GK (B.1.617.2+AY.*) first detected in India	GK	AY.4	1	Other
New York City	8419316	2022-01-02	Former VOC Delta GK (B.1.617.2+AY.*) first detected in India	GK	AY.4	2	Other
New York City	8419316	2022-01-09	Former VOC Delta GK (B.1.617.2+AY.*) first detected in India	GK	AY.4	2	Other
Southern Tier	636657	2022-01-09	Former VOC Delta GK (B.1.617.2+AY.*) first detected in India	GK	AY.4	1	Other
Western New York	1382480	2022-01-02	Former VOC Delta GK (B.1.617.2+AY.*) first detected in India	GK	AY.4	1	Other
Western New York	1382480	2022-01-09	Former VOC Delta GK (B.1.617.2+AY.*) first detected in India	GK	AY.4	1	Other
Ontario CA	14570000	2022-01-02	Former VOC Delta GK (B.1.617.2+AY.*) first detected in India	GK	AY.4	1	Other
Mid-Hudson	2319719	2022-01-02	Former VOC Delta GK (B.1.617.2+AY.*) first detected in India	GK	AY.43	2	Other
New York City	8419316	2022-01-02	Former VOC Delta GK (B.1.617.2+AY.*) first detected in India	GK	AY.43	6	Other
New York City	8419316	2022-01-09	Former VOC Delta GK (B.1.617.2+AY.*) first detected in India	GK	AY.43	1	Other
Western New York	1382480	2022-01-02	Former VOC Delta GK (B.1.617.2+AY.*) first detected in India	GK	AY.43	1	Other
Ontario CA	14570000	2022-01-02	Former VOC Delta GK (B.1.617.2+AY.*) first detected in India	GK	AY.43	1	Other
Ontario CA	14570000	2022-01-09	Former VOC Delta GK (B.1.617.2+AY.*) first detected in India	GK	AY.43	1	Other
New York City	8419316	2022-01-02	Former VOC Delta GK (B.1.617.2+AY.*) first detected in India	GK	AY.43.3	1	Other
Capital Region	1083201	2022-01-02	Former VOC Delta GK (B.1.617.2+AY.*) first detected in India	GK	AY.44	4	Other
Capital Region	1083201	2022-01-30	Former VOC Delta GK (B.1.617.2+AY.*) first detected in India	GK	AY.44	1	Other
Finger Lakes	1205380	2022-01-09	Former VOC Delta GK (B.1.617.2+AY.*) first detected in India	GK	AY.44	8	Other
Finger Lakes	1205380	2022-09-25	Former VOC Delta GK (B.1.617.2+AY.*) first detected in India	GK	AY.44	1	Other
Mid-Hudson	2319719	2022-01-02	Former VOC Delta GK (B.1.617.2+AY.*) first detected in India	GH	AY.44	1	Other
Mid-Hudson	2319719	2022-01-02	Former VOC Delta GK (B.1.617.2+AY.*) first detected in India	GK	AY.44	4	Other
Mohawk Valley	486158	2022-01-02	Former VOC Delta GK (B.1.617.2+AY.*) first detected in India	GK	AY.44	2	Other
Mohawk Valley	486158	2022-01-16	Former VOC Delta GK (B.1.617.2+AY.*) first detected in India	GK	AY.44	1	Other
New York City	8419316	2022-01-02	Former VOC Delta GK (B.1.617.2+AY.*) first detected in India	GK	AY.44	12	Other
New York City	8419316	2022-01-09	Former VOC Delta GK (B.1.617.2+AY.*) first detected in India	GK	AY.44	6	Other
New York City	8419316	2022-01-16	Former VOC Delta GK (B.1.617.2+AY.*) first detected in India	GK	AY.44	2	Other
New York City	8419316	2022-01-23	Former VOC Delta GK (B.1.617.2+AY.*) first detected in India	GK	AY.44	1	Other
New York City	8419316	2022-01-30	Former VOC Delta GK (B.1.617.2+AY.*) first detected in India	GK	AY.44	6	Other
North Country	421361	2022-01-02	Former VOC Delta GK (B.1.617.2+AY.*) first detected in India	GK	AY.44	2	Other
Southern Tier	636657	2022-01-09	Former VOC Delta GK (B.1.617.2+AY.*) first detected in India	GK	AY.44	1	Other
Southern Tier	636657	2022-01-23	Former VOC Delta GK (B.1.617.2+AY.*) first detected in India	GK	AY.44	2	Other
Western New York	1382480	2022-01-02	Former VOC Delta GK (B.1.617.2+AY.*) first detected in India	GK	AY.44	2	Other
Western New York	1382480	2022-01-16	Former VOC Delta GK (B.1.617.2+AY.*) first detected in India	GK	AY.44	1	Other
Ontario CA	14570000	2022-01-02	Former VOC Delta GK (B.1.617.2+AY.*) first detected in India	GK	AY.44	3	Other
Ontario CA	14570000	2022-06-19	Former VOC Delta GK (B.1.617.2+AY.*) first detected in India	GK	AY.44	3	Other
Mid-Hudson	2319719	2022-01-02	Former VOC Delta GK (B.1.617.2+AY.*) first detected in India	GK	AY.46.1	1	Other
New York City	8419316	2022-01-02	Former VOC Delta GK (B.1.617.2+AY.*) first detected in India	GK	AY.46.1	1	Other
Finger Lakes	1205380	2022-01-09	Former VOC Delta GK (B.1.617.2+AY.*) first detected in India	GK	AY.47	2	Other
New York City	8419316	2022-01-09	Former VOC Delta GK (B.1.617.2+AY.*) first detected in India	GK	AY.47	1	Other
New York City	8419316	2022-01-23	Former VOC Delta GK (B.1.617.2+AY.*) first detected in India	GK	AY.47	1	Other
New York City	8419316	2022-02-06	Former VOC Delta GK (B.1.617.2+AY.*) first detected in India	GK	AY.47	1	Other
North Country	421361	2022-01-02	Former VOC Delta GK (B.1.617.2+AY.*) first detected in India	GK	AY.47	1	Other
New York City	8419316	2022-01-02	Former VOC Delta GK (B.1.617.2+AY.*) first detected in India	GK	AY.5.3	1	Other
Capital Region	1083201	2022-01-02	Former VOC Delta GK (B.1.617.2+AY.*) first detected in India	GK	AY.56	1	Other
Ontario CA	14570000	2022-01-02	Former VOC Delta GK (B.1.617.2+AY.*) first detected in India	GK	AY.6	2	Other
Ontario CA	14570000	2022-01-02	Former VOC Delta GK (B.1.617.2+AY.*) first detected in India	GK	AY.74	3	Other
Ontario CA	14570000	2022-01-09	Former VOC Delta GK (B.1.617.2+AY.*) first detected in India	GK	AY.74	3	Other
Ontario CA	14570000	2022-01-16	Former VOC Delta GK (B.1.617.2+AY.*) first detected in India	GK	AY.74	2	Other
Ontario CA	14570000	2022-01-23	Former VOC Delta GK (B.1.617.2+AY.*) first detected in India	GK	AY.74	2	Other
Ontario CA	14570000	2022-01-30	Former VOC Delta GK (B.1.617.2+AY.*) first detected in India	GK	AY.74	2	Other
Finger Lakes	1205380	2022-01-09	Former VOC Delta GK (B.1.617.2+AY.*) first detected in India	GK	AY.75	1	Other
Ontario CA	14570000	2022-01-02	Former VOC Delta GK (B.1.617.2+AY.*) first detected in India	GK	AY.75	2	Other
Ontario CA	14570000	2022-01-09	Former VOC Delta GK (B.1.617.2+AY.*) first detected in India	GK	AY.75	1	Other
Ontario CA	14570000	2022-01-16	Former VOC Delta GK (B.1.617.2+AY.*) first detected in India	GK	AY.75	2	Other
Ontario CA	14570000	2022-01-23	Former VOC Delta GK (B.1.617.2+AY.*) first detected in India	GK	AY.75	1	Other
Ontario CA	14570000	2022-01-09	Former VOC Delta GK (B.1.617.2+AY.*) first detected in India	GK	AY.86	2	Other
New York City	8419316	2022-01-09		O	B	1	Other
Mid-Hudson	2319719	2022-01-02	Former VOC Omicron GRA (B.1.1.529+BA.*) first detected in Botswana/Hong Kong/South Africa	GRA	B.1.1.529	1	Other
New York City	8419316	2022-01-09	Former VOC Omicron GRA (B.1.1.529+BA.*) first detected in Botswana/Hong Kong/South Africa	GRA	B.1.1.529	1	Other
New York City	8419316	2022-01-23	Former VOC Omicron GRA (B.1.1.529+BA.*) first detected in Botswana/Hong Kong/South Africa	GRA	B.1.1.529	1	Other
New York City	8419316	2022-03-06	Former VOC Omicron GRA (B.1.1.529+BA.*) first detected in Botswana/Hong Kong/South Africa	GRA	B.1.1.529	2	Other
New York City	8419316	2022-04-24	Former VOC Omicron GRA (B.1.1.529+BA.*) first detected in Botswana/Hong Kong/South Africa	GRA	B.1.1.529	1	Other
New York City	8419316	2022-05-01	Former VOC Omicron GRA (B.1.1.529+BA.*) first detected in Botswana/Hong Kong/South Africa	GR	B.1.1.529	1	Other
New York City	8419316	2022-05-01	Former VOC Omicron GRA (B.1.1.529+BA.*) first detected in Botswana/Hong Kong/South Africa	GRA	B.1.1.529	1	Other
New York City	8419316	2022-05-22	Former VOC Omicron GRA (B.1.1.529+BA.*) first detected in Botswana/Hong Kong/South Africa	GRA	B.1.1.529	1	Other
New York City	8419316	2022-05-29	Former VOC Omicron GRA (B.1.1.529+BA.*) first detected in Botswana/Hong Kong/South Africa	GRA	B.1.1.529	1	Other
New York City	8419316	2022-11-20	Former VOC Omicron GRA (B.1.1.529+BA.*) first detected in Botswana/Hong Kong/South Africa	GRA	B.1.1.529	1	Other
Ontario CA	14570000	2022-04-10	Former VOC Omicron GRA (B.1.1.529+BA.*) first detected in Botswana/Hong Kong/South Africa	GRA	B.1.1.529	1	Other
Ontario CA	14570000	2022-05-01	Former VOC Omicron GRA (B.1.1.529+BA.*) first detected in Botswana/Hong Kong/South Africa	GRA	B.1.1.529	1	Other
New York City	8419316	2022-02-06	Former VOC Alpha GRY (B.1.1.7+Q.*) first detected in the UK	GR	B.1.1.7	1	Other
New York City	8419316	2022-03-13	Former VOC Alpha GRY (B.1.1.7+Q.*) first detected in the UK	GRY	B.1.1.7	1	Other
New York City	8419316	2022-04-10		GH	B.1.2	1	Other
New York City	8419316	2022-03-13	Former VOC Beta GH/501Y.V2 (B.1.351+B.1.351.2+B.1.351.3) first detected in South Africa	GH	B.1.351	1	Other
Finger Lakes	1205380	2022-01-09	Former VOC Delta GK (B.1.617.2+AY.*) first detected in India	GK	B.1.617.2	1	Other
New York City	8419316	2022-01-02	Former VOC Delta GK (B.1.617.2+AY.*) first detected in India	GK	B.1.617.2	3	Other
New York City	8419316	2022-01-09	Former VOC Delta GK (B.1.617.2+AY.*) first detected in India	GK	B.1.617.2	1	Other
New York City	8419316	2022-03-13	Former VOC Delta GK (B.1.617.2+AY.*) first detected in India	GK	B.1.617.2	1	Other
Ontario CA	14570000	2022-01-09	Former VOC Delta GK (B.1.617.2+AY.*) first detected in India	GK	B.1.617.2	1	Other
Ontario CA	14570000	2022-01-23	Former VOC Delta GK (B.1.617.2+AY.*) first detected in India	GK	B.1.617.2	1	Other
New York City	8419316	2022-01-02		GH	B.1.637.1	1	Other
New York City	8419316	2022-01-09		GH	B.1.637.1	1	Other
Ontario CA	14570000	2022-01-02	Former VUM GH/490R (B.1.640+B.1.640.*) first detected in Congo/France	GH	B.1.640.1	1	Other
Finger Lakes	1205380	2022-01-30	Former VOC Omicron GRA (B.1.1.529+BA.*) first detected in Botswana/Hong Kong/South Africa	GRA	BA.1.1.1	2	Other
Finger Lakes	1205380	2022-02-06	Former VOC Omicron GRA (B.1.1.529+BA.*) first detected in Botswana/Hong Kong/South Africa	GRA	BA.1.1.1	1	Other
New York City	8419316	2022-01-02	Former VOC Omicron GRA (B.1.1.529+BA.*) first detected in Botswana/Hong Kong/South Africa	GRA	BA.1.1.1	4	Other
New York City	8419316	2022-01-09	Former VOC Omicron GRA (B.1.1.529+BA.*) first detected in Botswana/Hong Kong/South Africa	GRA	BA.1.1.1	10	Other
New York City	8419316	2022-01-16	Former VOC Omicron GRA (B.1.1.529+BA.*) first detected in Botswana/Hong Kong/South Africa	GRA	BA.1.1.1	5	Other
New York City	8419316	2022-01-23	Former VOC Omicron GRA (B.1.1.529+BA.*) first detected in Botswana/Hong Kong/South Africa	GRA	BA.1.1.1	4	Other
New York City	8419316	2022-01-30	Former VOC Omicron GRA (B.1.1.529+BA.*) first detected in Botswana/Hong Kong/South Africa	GRA	BA.1.1.1	2	Other
New York City	8419316	2022-02-06	Former VOC Omicron GRA (B.1.1.529+BA.*) first detected in Botswana/Hong Kong/South Africa	GRA	BA.1.1.1	2	Other
New York City	8419316	2022-02-13	Former VOC Omicron GRA (B.1.1.529+BA.*) first detected in Botswana/Hong Kong/South Africa	GRA	BA.1.1.1	6	Other
New York City	8419316	2022-02-20	Former VOC Omicron GRA (B.1.1.529+BA.*) first detected in Botswana/Hong Kong/South Africa	GRA	BA.1.1.1	3	Other
New York City	8419316	2022-02-27	Former VOC Omicron GRA (B.1.1.529+BA.*) first detected in Botswana/Hong Kong/South Africa	GRA	BA.1.1.1	8	Other
New York City	8419316	2022-03-06	Former VOC Omicron GRA (B.1.1.529+BA.*) first detected in Botswana/Hong Kong/South Africa	GRA	BA.1.1.1	5	Other
New York City	8419316	2022-03-13	Former VOC Omicron GRA (B.1.1.529+BA.*) first detected in Botswana/Hong Kong/South Africa	GRA	BA.1.1.1	3	Other
New York City	8419316	2022-04-03	Former VOC Omicron GRA (B.1.1.529+BA.*) first detected in Botswana/Hong Kong/South Africa	GRA	BA.1.1.1	1	Other
New York City	8419316	2022-05-15	Former VOC Omicron GRA (B.1.1.529+BA.*) first detected in Botswana/Hong Kong/South Africa	GRA	BA.1.1.1	1	Other
New York City	8419316	2022-11-13	Former VOC Omicron GRA (B.1.1.529+BA.*) first detected in Botswana/Hong Kong/South Africa	GRA	BA.1.1.1	1	Other
Southern Tier	636657	2022-01-30	Former VOC Omicron GRA (B.1.1.529+BA.*) first detected in Botswana/Hong Kong/South Africa	GRA	BA.1.1.1	2	Other
Ontario CA	14570000	2022-01-02	Former VOC Omicron GRA (B.1.1.529+BA.*) first detected in Botswana/Hong Kong/South Africa	GRA	BA.1.1.1	1	Other
Ontario CA	14570000	2022-01-09	Former VOC Omicron GRA (B.1.1.529+BA.*) first detected in Botswana/Hong Kong/South Africa	GRA	BA.1.1.1	8	Other
Ontario CA	14570000	2022-01-16	Former VOC Omicron GRA (B.1.1.529+BA.*) first detected in Botswana/Hong Kong/South Africa	GRA	BA.1.1.1	1	Other
Ontario CA	14570000	2022-02-06	Former VOC Omicron GRA (B.1.1.529+BA.*) first detected in Botswana/Hong Kong/South Africa	GRA	BA.1.1.1	3	Other
Ontario CA	14570000	2022-02-13	Former VOC Omicron GRA (B.1.1.529+BA.*) first detected in Botswana/Hong Kong/South Africa	GRA	BA.1.1.1	4	Other
Ontario CA	14570000	2022-02-20	Former VOC Omicron GRA (B.1.1.529+BA.*) first detected in Botswana/Hong Kong/South Africa	GRA	BA.1.1.1	2	Other
Ontario CA	14570000	2022-02-27	Former VOC Omicron GRA (B.1.1.529+BA.*) first detected in Botswana/Hong Kong/South Africa	GRA	BA.1.1.1	4	Other
Ontario CA	14570000	2022-03-06	Former VOC Omicron GRA (B.1.1.529+BA.*) first detected in Botswana/Hong Kong/South Africa	GRA	BA.1.1.1	4	Other
Ontario CA	14570000	2022-03-13	Former VOC Omicron GRA (B.1.1.529+BA.*) first detected in Botswana/Hong Kong/South Africa	GRA	BA.1.1.1	1	Other
Ontario CA	14570000	2022-03-20	Former VOC Omicron GRA (B.1.1.529+BA.*) first detected in Botswana/Hong Kong/South Africa	GRA	BA.1.1.1	2	Other
Ontario CA	14570000	2022-03-27	Former VOC Omicron GRA (B.1.1.529+BA.*) first detected in Botswana/Hong Kong/South Africa	GRA	BA.1.1.1	1	Other
Ontario CA	14570000	2022-04-03	Former VOC Omicron GRA (B.1.1.529+BA.*) first detected in Botswana/Hong Kong/South Africa	GRA	BA.1.1.1	2	Other
Ontario CA	14570000	2022-04-10	Former VOC Omicron GRA (B.1.1.529+BA.*) first detected in Botswana/Hong Kong/South Africa	GRA	BA.1.1.1	1	Other
Capital Region	1083201	2022-01-30	Former VOC Omicron GRA (B.1.1.529+BA.*) first detected in Botswana/Hong Kong/South Africa	GRA	BA.1.1.10	1	Other
Central New York	777706	2022-02-27	Former VOC Omicron GRA (B.1.1.529+BA.*) first detected in Botswana/Hong Kong/South Africa	GRA	BA.1.1.10	1	Other
New York City	8419316	2022-01-02	Former VOC Omicron GRA (B.1.1.529+BA.*) first detected in Botswana/Hong Kong/South Africa	GRA	BA.1.1.10	4	Other
New York City	8419316	2022-01-09	Former VOC Omicron GRA (B.1.1.529+BA.*) first detected in Botswana/Hong Kong/South Africa	GRA	BA.1.1.10	8	Other
New York City	8419316	2022-01-16	Former VOC Omicron GRA (B.1.1.529+BA.*) first detected in Botswana/Hong Kong/South Africa	GRA	BA.1.1.10	5	Other
New York City	8419316	2022-01-23	Former VOC Omicron GRA (B.1.1.529+BA.*) first detected in Botswana/Hong Kong/South Africa	GRA	BA.1.1.10	4	Other
New York City	8419316	2022-01-30	Former VOC Omicron GRA (B.1.1.529+BA.*) first detected in Botswana/Hong Kong/South Africa	GRA	BA.1.1.10	6	Other
New York City	8419316	2022-02-06	Former VOC Omicron GRA (B.1.1.529+BA.*) first detected in Botswana/Hong Kong/South Africa	GRA	BA.1.1.10	1	Other
New York City	8419316	2022-02-13	Former VOC Omicron GRA (B.1.1.529+BA.*) first detected in Botswana/Hong Kong/South Africa	GRA	BA.1.1.10	2	Other
New York City	8419316	2022-02-20	Former VOC Omicron GRA (B.1.1.529+BA.*) first detected in Botswana/Hong Kong/South Africa	GRA	BA.1.1.10	1	Other
New York City	8419316	2022-03-20	Former VOC Omicron GRA (B.1.1.529+BA.*) first detected in Botswana/Hong Kong/South Africa	GRA	BA.1.1.10	1	Other
New York City	8419316	2022-03-27	Former VOC Omicron GRA (B.1.1.529+BA.*) first detected in Botswana/Hong Kong/South Africa	GRA	BA.1.1.10	1	Other
Western New York	1382480	2022-01-02	Former VOC Omicron GRA (B.1.1.529+BA.*) first detected in Botswana/Hong Kong/South Africa	GRA	BA.1.1.10	3	Other
Western New York	1382480	2022-01-16	Former VOC Omicron GRA (B.1.1.529+BA.*) first detected in Botswana/Hong Kong/South Africa	GRA	BA.1.1.10	2	Other
Western New York	1382480	2022-03-13	Former VOC Omicron GRA (B.1.1.529+BA.*) first detected in Botswana/Hong Kong/South Africa	GRA	BA.1.1.10	1	Other
Ontario CA	14570000	2022-01-02	Former VOC Omicron GRA (B.1.1.529+BA.*) first detected in Botswana/Hong Kong/South Africa	GRA	BA.1.1.10	99	Other
Ontario CA	14570000	2022-01-09	Former VOC Omicron GRA (B.1.1.529+BA.*) first detected in Botswana/Hong Kong/South Africa	GRA	BA.1.1.10	99	Other
Ontario CA	14570000	2022-01-16	Former VOC Omicron GRA (B.1.1.529+BA.*) first detected in Botswana/Hong Kong/South Africa	GRA	BA.1.1.10	76	Other
Ontario CA	14570000	2022-01-23	Former VOC Omicron GRA (B.1.1.529+BA.*) first detected in Botswana/Hong Kong/South Africa	GRA	BA.1.1.10	38	Other
Ontario CA	14570000	2022-01-30	Former VOC Omicron GRA (B.1.1.529+BA.*) first detected in Botswana/Hong Kong/South Africa	GRA	BA.1.1.10	34	Other
Ontario CA	14570000	2022-02-06	Former VOC Omicron GRA (B.1.1.529+BA.*) first detected in Botswana/Hong Kong/South Africa	GRA	BA.1.1.10	39	Other
Ontario CA	14570000	2022-02-13	Former VOC Omicron GRA (B.1.1.529+BA.*) first detected in Botswana/Hong Kong/South Africa	GRA	BA.1.1.10	53	Other
Ontario CA	14570000	2022-02-20	Former VOC Omicron GRA (B.1.1.529+BA.*) first detected in Botswana/Hong Kong/South Africa	GRA	BA.1.1.10	35	Other
Ontario CA	14570000	2022-02-27	Former VOC Omicron GRA (B.1.1.529+BA.*) first detected in Botswana/Hong Kong/South Africa	GRA	BA.1.1.10	41	Other
Ontario CA	14570000	2022-03-06	Former VOC Omicron GRA (B.1.1.529+BA.*) first detected in Botswana/Hong Kong/South Africa	GRA	BA.1.1.10	41	Other
Ontario CA	14570000	2022-03-13	Former VOC Omicron GRA (B.1.1.529+BA.*) first detected in Botswana/Hong Kong/South Africa	GRA	BA.1.1.10	33	Other
Ontario CA	14570000	2022-03-20	Former VOC Omicron GRA (B.1.1.529+BA.*) first detected in Botswana/Hong Kong/South Africa	GRA	BA.1.1.10	39	Other
Ontario CA	14570000	2022-03-27	Former VOC Omicron GRA (B.1.1.529+BA.*) first detected in Botswana/Hong Kong/South Africa	GRA	BA.1.1.10	17	Other
Ontario CA	14570000	2022-04-03	Former VOC Omicron GRA (B.1.1.529+BA.*) first detected in Botswana/Hong Kong/South Africa	GRA	BA.1.1.10	12	Other
Ontario CA	14570000	2022-04-10	Former VOC Omicron GRA (B.1.1.529+BA.*) first detected in Botswana/Hong Kong/South Africa	GRA	BA.1.1.10	3	Other
Ontario CA	14570000	2022-04-17	Former VOC Omicron GRA (B.1.1.529+BA.*) first detected in Botswana/Hong Kong/South Africa	GRA	BA.1.1.10	4	Other
Ontario CA	14570000	2022-04-24	Former VOC Omicron GRA (B.1.1.529+BA.*) first detected in Botswana/Hong Kong/South Africa	GRA	BA.1.1.10	1	Other
Ontario CA	14570000	2022-05-08	Former VOC Omicron GRA (B.1.1.529+BA.*) first detected in Botswana/Hong Kong/South Africa	GRA	BA.1.1.10	3	Other
Ontario CA	14570000	2022-05-22	Former VOC Omicron GRA (B.1.1.529+BA.*) first detected in Botswana/Hong Kong/South Africa	GRA	BA.1.1.10	1	Other
Ontario CA	14570000	2022-06-12	Former VOC Omicron GRA (B.1.1.529+BA.*) first detected in Botswana/Hong Kong/South Africa	GRA	BA.1.1.10	1	Other
Ontario CA	14570000	2022-06-19	Former VOC Omicron GRA (B.1.1.529+BA.*) first detected in Botswana/Hong Kong/South Africa	GRA	BA.1.1.10	4	Other
Ontario CA	14570000	2022-07-03	Former VOC Omicron GRA (B.1.1.529+BA.*) first detected in Botswana/Hong Kong/South Africa	GRA	BA.1.1.10	1	Other
Ontario CA	14570000	2022-07-17	Former VOC Omicron GRA (B.1.1.529+BA.*) first detected in Botswana/Hong Kong/South Africa	GRA	BA.1.1.10	1	Other
New York City	8419316	2022-01-09	Former VOC Omicron GRA (B.1.1.529+BA.*) first detected in Botswana/Hong Kong/South Africa	GRA	BA.1.1.11	1	Other
New York City	8419316	2022-02-06	Former VOC Omicron GRA (B.1.1.529+BA.*) first detected in Botswana/Hong Kong/South Africa	GRA	BA.1.1.11	1	Other
New York City	8419316	2022-02-27	Former VOC Omicron GRA (B.1.1.529+BA.*) first detected in Botswana/Hong Kong/South Africa	GRA	BA.1.1.11	1	Other
New York City	8419316	2022-03-13	Former VOC Omicron GRA (B.1.1.529+BA.*) first detected in Botswana/Hong Kong/South Africa	GRA	BA.1.1.11	2	Other
New York City	8419316	2022-03-20	Former VOC Omicron GRA (B.1.1.529+BA.*) first detected in Botswana/Hong Kong/South Africa	GRA	BA.1.1.11	4	Other
Finger Lakes	1205380	2022-02-06	Former VOC Omicron GRA (B.1.1.529+BA.*) first detected in Botswana/Hong Kong/South Africa	GRA	BA.1.1.12	1	Other
Mid-Hudson	2319719	2022-01-09	Former VOC Omicron GRA (B.1.1.529+BA.*) first detected in Botswana/Hong Kong/South Africa	GRA	BA.1.1.13	1	Other
New York City	8419316	2022-01-02	Former VOC Omicron GRA (B.1.1.529+BA.*) first detected in Botswana/Hong Kong/South Africa	GRA	BA.1.1.13	1	Other
New York City	8419316	2022-01-30	Former VOC Omicron GRA (B.1.1.529+BA.*) first detected in Botswana/Hong Kong/South Africa	GRA	BA.1.1.13	1	Other
New York City	8419316	2022-02-13	Former VOC Omicron GRA (B.1.1.529+BA.*) first detected in Botswana/Hong Kong/South Africa	GRA	BA.1.1.13	1	Other
New York City	8419316	2022-03-06	Former VOC Omicron GRA (B.1.1.529+BA.*) first detected in Botswana/Hong Kong/South Africa	GRA	BA.1.1.13	1	Other
Ontario CA	14570000	2022-01-23	Former VOC Omicron GRA (B.1.1.529+BA.*) first detected in Botswana/Hong Kong/South Africa	GRA	BA.1.1.13	1	Other
Ontario CA	14570000	2022-02-06	Former VOC Omicron GRA (B.1.1.529+BA.*) first detected in Botswana/Hong Kong/South Africa	GRA	BA.1.1.13	1	Other
Capital Region	1083201	2022-02-20	Former VOC Omicron GRA (B.1.1.529+BA.*) first detected in Botswana/Hong Kong/South Africa	GRA	BA.1.1.14	1	Other
Capital Region	1083201	2022-02-27	Former VOC Omicron GRA (B.1.1.529+BA.*) first detected in Botswana/Hong Kong/South Africa	GRA	BA.1.1.14	1	Other
Central New York	777706	2022-01-09	Former VOC Omicron GRA (B.1.1.529+BA.*) first detected in Botswana/Hong Kong/South Africa	GRA	BA.1.1.14	1	Other
Central New York	777706	2022-01-16	Former VOC Omicron GRA (B.1.1.529+BA.*) first detected in Botswana/Hong Kong/South Africa	GRA	BA.1.1.14	1	Other
Central New York	777706	2022-01-23	Former VOC Omicron GRA (B.1.1.529+BA.*) first detected in Botswana/Hong Kong/South Africa	GRA	BA.1.1.14	1	Other
Central New York	777706	2022-02-20	Former VOC Omicron GRA (B.1.1.529+BA.*) first detected in Botswana/Hong Kong/South Africa	GRA	BA.1.1.14	1	Other
Finger Lakes	1205380	2022-01-09	Former VOC Omicron GRA (B.1.1.529+BA.*) first detected in Botswana/Hong Kong/South Africa	GRA	BA.1.1.14	1	Other
Finger Lakes	1205380	2022-01-16	Former VOC Omicron GRA (B.1.1.529+BA.*) first detected in Botswana/Hong Kong/South Africa	GRA	BA.1.1.14	2	Other
Finger Lakes	1205380	2022-01-23	Former VOC Omicron GRA (B.1.1.529+BA.*) first detected in Botswana/Hong Kong/South Africa	GRA	BA.1.1.14	1	Other
Finger Lakes	1205380	2022-01-30	Former VOC Omicron GRA (B.1.1.529+BA.*) first detected in Botswana/Hong Kong/South Africa	GRA	BA.1.1.14	2	Other
Finger Lakes	1205380	2022-02-06	Former VOC Omicron GRA (B.1.1.529+BA.*) first detected in Botswana/Hong Kong/South Africa	GRA	BA.1.1.14	3	Other
Finger Lakes	1205380	2022-02-13	Former VOC Omicron GRA (B.1.1.529+BA.*) first detected in Botswana/Hong Kong/South Africa	GRA	BA.1.1.14	2	Other
Finger Lakes	1205380	2022-02-20	Former VOC Omicron GRA (B.1.1.529+BA.*) first detected in Botswana/Hong Kong/South Africa	GRA	BA.1.1.14	2	Other
Finger Lakes	1205380	2022-03-13	Former VOC Omicron GRA (B.1.1.529+BA.*) first detected in Botswana/Hong Kong/South Africa	GRA	BA.1.1.14	1	Other
Mid-Hudson	2319719	2022-01-02	Former VOC Omicron GRA (B.1.1.529+BA.*) first detected in Botswana/Hong Kong/South Africa	GRA	BA.1.1.14	4	Other
Mid-Hudson	2319719	2022-01-09	Former VOC Omicron GRA (B.1.1.529+BA.*) first detected in Botswana/Hong Kong/South Africa	GRA	BA.1.1.14	2	Other
Mid-Hudson	2319719	2022-01-16	Former VOC Omicron GRA (B.1.1.529+BA.*) first detected in Botswana/Hong Kong/South Africa	GRA	BA.1.1.14	1	Other
Mid-Hudson	2319719	2022-01-30	Former VOC Omicron GRA (B.1.1.529+BA.*) first detected in Botswana/Hong Kong/South Africa	GRA	BA.1.1.14	2	Other
Mid-Hudson	2319719	2022-02-13	Former VOC Omicron GRA (B.1.1.529+BA.*) first detected in Botswana/Hong Kong/South Africa	GRA	BA.1.1.14	1	Other
New York City	8419316	2022-01-02	Former VOC Omicron GRA (B.1.1.529+BA.*) first detected in Botswana/Hong Kong/South Africa	GRA	BA.1.1.14	35	Other
New York City	8419316	2022-01-09	Former VOC Omicron GRA (B.1.1.529+BA.*) first detected in Botswana/Hong Kong/South Africa	GRA	BA.1.1.14	43	Other
New York City	8419316	2022-01-16	Former VOC Omicron GRA (B.1.1.529+BA.*) first detected in Botswana/Hong Kong/South Africa	GRA	BA.1.1.14	34	Other
New York City	8419316	2022-01-23	Former VOC Omicron GRA (B.1.1.529+BA.*) first detected in Botswana/Hong Kong/South Africa	GRA	BA.1.1.14	19	Other
New York City	8419316	2022-01-30	Former VOC Omicron GRA (B.1.1.529+BA.*) first detected in Botswana/Hong Kong/South Africa	GRA	BA.1.1.14	17	Other
New York City	8419316	2022-02-06	Former VOC Omicron GRA (B.1.1.529+BA.*) first detected in Botswana/Hong Kong/South Africa	GRA	BA.1.1.14	9	Other
New York City	8419316	2022-02-13	Former VOC Omicron GRA (B.1.1.529+BA.*) first detected in Botswana/Hong Kong/South Africa	GRA	BA.1.1.14	9	Other
New York City	8419316	2022-02-20	Former VOC Omicron GRA (B.1.1.529+BA.*) first detected in Botswana/Hong Kong/South Africa	GRA	BA.1.1.14	7	Other
New York City	8419316	2022-02-27	Former VOC Omicron GRA (B.1.1.529+BA.*) first detected in Botswana/Hong Kong/South Africa	GRA	BA.1.1.14	3	Other
New York City	8419316	2022-03-06	Former VOC Omicron GRA (B.1.1.529+BA.*) first detected in Botswana/Hong Kong/South Africa	GRA	BA.1.1.14	3	Other
New York City	8419316	2022-03-13	Former VOC Omicron GRA (B.1.1.529+BA.*) first detected in Botswana/Hong Kong/South Africa	GRA	BA.1.1.14	4	Other
New York City	8419316	2022-03-20	Former VOC Omicron GRA (B.1.1.529+BA.*) first detected in Botswana/Hong Kong/South Africa	GRA	BA.1.1.14	1	Other
New York City	8419316	2022-03-27	Former VOC Omicron GRA (B.1.1.529+BA.*) first detected in Botswana/Hong Kong/South Africa	GRA	BA.1.1.14	1	Other
New York City	8419316	2022-04-03	Former VOC Omicron GRA (B.1.1.529+BA.*) first detected in Botswana/Hong Kong/South Africa	GRA	BA.1.1.14	2	Other
Southern Tier	636657	2022-01-02	Former VOC Omicron GRA (B.1.1.529+BA.*) first detected in Botswana/Hong Kong/South Africa	GRA	BA.1.1.14	4	Other
Southern Tier	636657	2022-01-09	Former VOC Omicron GRA (B.1.1.529+BA.*) first detected in Botswana/Hong Kong/South Africa	GRA	BA.1.1.14	3	Other
Southern Tier	636657	2022-01-16	Former VOC Omicron GRA (B.1.1.529+BA.*) first detected in Botswana/Hong Kong/South Africa	GRA	BA.1.1.14	3	Other
Southern Tier	636657	2022-01-30	Former VOC Omicron GRA (B.1.1.529+BA.*) first detected in Botswana/Hong Kong/South Africa	GRA	BA.1.1.14	3	Other
Southern Tier	636657	2022-02-13	Former VOC Omicron GRA (B.1.1.529+BA.*) first detected in Botswana/Hong Kong/South Africa	GRA	BA.1.1.14	5	Other
Southern Tier	636657	2022-02-20	Former VOC Omicron GRA (B.1.1.529+BA.*) first detected in Botswana/Hong Kong/South Africa	GRA	BA.1.1.14	3	Other
Western New York	1382480	2022-01-02	Former VOC Omicron GRA (B.1.1.529+BA.*) first detected in Botswana/Hong Kong/South Africa	GRA	BA.1.1.14	6	Other
Western New York	1382480	2022-01-09	Former VOC Omicron GRA (B.1.1.529+BA.*) first detected in Botswana/Hong Kong/South Africa	GRA	BA.1.1.14	8	Other
Western New York	1382480	2022-01-16	Former VOC Omicron GRA (B.1.1.529+BA.*) first detected in Botswana/Hong Kong/South Africa	GRA	BA.1.1.14	2	Other
Western New York	1382480	2022-01-23	Former VOC Omicron GRA (B.1.1.529+BA.*) first detected in Botswana/Hong Kong/South Africa	GRA	BA.1.1.14	3	Other
Western New York	1382480	2022-02-06	Former VOC Omicron GRA (B.1.1.529+BA.*) first detected in Botswana/Hong Kong/South Africa	GRA	BA.1.1.14	3	Other
Western New York	1382480	2022-02-20	Former VOC Omicron GRA (B.1.1.529+BA.*) first detected in Botswana/Hong Kong/South Africa	GRA	BA.1.1.14	1	Other
Western New York	1382480	2022-03-27	Former VOC Omicron GRA (B.1.1.529+BA.*) first detected in Botswana/Hong Kong/South Africa	GRA	BA.1.1.14	1	Other
Ontario CA	14570000	2022-01-02	Former VOC Omicron GRA (B.1.1.529+BA.*) first detected in Botswana/Hong Kong/South Africa	GRA	BA.1.1.14	28	Other
Ontario CA	14570000	2022-01-09	Former VOC Omicron GRA (B.1.1.529+BA.*) first detected in Botswana/Hong Kong/South Africa	GRA	BA.1.1.14	25	Other
Ontario CA	14570000	2022-01-16	Former VOC Omicron GRA (B.1.1.529+BA.*) first detected in Botswana/Hong Kong/South Africa	GRA	BA.1.1.14	20	Other
Ontario CA	14570000	2022-01-23	Former VOC Omicron GRA (B.1.1.529+BA.*) first detected in Botswana/Hong Kong/South Africa	GRA	BA.1.1.14	10	Other
Ontario CA	14570000	2022-01-30	Former VOC Omicron GRA (B.1.1.529+BA.*) first detected in Botswana/Hong Kong/South Africa	GRA	BA.1.1.14	22	Other
Ontario CA	14570000	2022-02-06	Former VOC Omicron GRA (B.1.1.529+BA.*) first detected in Botswana/Hong Kong/South Africa	GRA	BA.1.1.14	15	Other
Ontario CA	14570000	2022-02-13	Former VOC Omicron GRA (B.1.1.529+BA.*) first detected in Botswana/Hong Kong/South Africa	GRA	BA.1.1.14	23	Other
Ontario CA	14570000	2022-02-20	Former VOC Omicron GRA (B.1.1.529+BA.*) first detected in Botswana/Hong Kong/South Africa	GRA	BA.1.1.14	11	Other
Ontario CA	14570000	2022-02-27	Former VOC Omicron GRA (B.1.1.529+BA.*) first detected in Botswana/Hong Kong/South Africa	GRA	BA.1.1.14	7	Other
Ontario CA	14570000	2022-03-06	Former VOC Omicron GRA (B.1.1.529+BA.*) first detected in Botswana/Hong Kong/South Africa	GRA	BA.1.1.14	10	Other
Ontario CA	14570000	2022-03-13	Former VOC Omicron GRA (B.1.1.529+BA.*) first detected in Botswana/Hong Kong/South Africa	GRA	BA.1.1.14	17	Other
Ontario CA	14570000	2022-03-20	Former VOC Omicron GRA (B.1.1.529+BA.*) first detected in Botswana/Hong Kong/South Africa	GRA	BA.1.1.14	13	Other
Ontario CA	14570000	2022-03-27	Former VOC Omicron GRA (B.1.1.529+BA.*) first detected in Botswana/Hong Kong/South Africa	GRA	BA.1.1.14	6	Other
Ontario CA	14570000	2022-04-03	Former VOC Omicron GRA (B.1.1.529+BA.*) first detected in Botswana/Hong Kong/South Africa	GRA	BA.1.1.14	6	Other
Ontario CA	14570000	2022-04-10	Former VOC Omicron GRA (B.1.1.529+BA.*) first detected in Botswana/Hong Kong/South Africa	GRA	BA.1.1.14	2	Other
New York City	8419316	2022-01-02	Former VOC Omicron GRA (B.1.1.529+BA.*) first detected in Botswana/Hong Kong/South Africa	GRA	BA.1.1.15	5	Other
New York City	8419316	2022-01-16	Former VOC Omicron GRA (B.1.1.529+BA.*) first detected in Botswana/Hong Kong/South Africa	GRA	BA.1.1.15	1	Other
New York City	8419316	2022-01-23	Former VOC Omicron GRA (B.1.1.529+BA.*) first detected in Botswana/Hong Kong/South Africa	GRA	BA.1.1.15	2	Other
New York City	8419316	2022-01-30	Former VOC Omicron GRA (B.1.1.529+BA.*) first detected in Botswana/Hong Kong/South Africa	GRA	BA.1.1.15	1	Other
New York City	8419316	2022-02-13	Former VOC Omicron GRA (B.1.1.529+BA.*) first detected in Botswana/Hong Kong/South Africa	GRA	BA.1.1.15	2	Other
New York City	8419316	2022-02-20	Former VOC Omicron GRA (B.1.1.529+BA.*) first detected in Botswana/Hong Kong/South Africa	GRA	BA.1.1.15	2	Other
New York City	8419316	2022-03-06	Former VOC Omicron GRA (B.1.1.529+BA.*) first detected in Botswana/Hong Kong/South Africa	GRA	BA.1.1.15	3	Other
New York City	8419316	2022-03-13	Former VOC Omicron GRA (B.1.1.529+BA.*) first detected in Botswana/Hong Kong/South Africa	GRA	BA.1.1.15	2	Other
New York City	8419316	2022-03-20	Former VOC Omicron GRA (B.1.1.529+BA.*) first detected in Botswana/Hong Kong/South Africa	GRA	BA.1.1.15	1	Other
Capital Region	1083201	2022-01-16	Former VOC Omicron GRA (B.1.1.529+BA.*) first detected in Botswana/Hong Kong/South Africa	GRA	BA.1.1.16	1	Other
Long Island	2840341	2022-02-27	Former VOC Omicron GRA (B.1.1.529+BA.*) first detected in Botswana/Hong Kong/South Africa	GRA	BA.1.1.16	1	Other
New York City	8419316	2022-01-02	Former VOC Omicron GRA (B.1.1.529+BA.*) first detected in Botswana/Hong Kong/South Africa	GRA	BA.1.1.16	5	Other
New York City	8419316	2022-01-09	Former VOC Omicron GRA (B.1.1.529+BA.*) first detected in Botswana/Hong Kong/South Africa	GRA	BA.1.1.16	3	Other
New York City	8419316	2022-01-16	Former VOC Omicron GRA (B.1.1.529+BA.*) first detected in Botswana/Hong Kong/South Africa	GRA	BA.1.1.16	5	Other
New York City	8419316	2022-01-23	Former VOC Omicron GRA (B.1.1.529+BA.*) first detected in Botswana/Hong Kong/South Africa	GRA	BA.1.1.16	1	Other
New York City	8419316	2022-01-30	Former VOC Omicron GRA (B.1.1.529+BA.*) first detected in Botswana/Hong Kong/South Africa	GRA	BA.1.1.16	2	Other
New York City	8419316	2022-02-06	Former VOC Omicron GRA (B.1.1.529+BA.*) first detected in Botswana/Hong Kong/South Africa	GRA	BA.1.1.16	4	Other
New York City	8419316	2022-02-20	Former VOC Omicron GRA (B.1.1.529+BA.*) first detected in Botswana/Hong Kong/South Africa	GRA	BA.1.1.16	1	Other
New York City	8419316	2022-02-27	Former VOC Omicron GRA (B.1.1.529+BA.*) first detected in Botswana/Hong Kong/South Africa	GRA	BA.1.1.16	4	Other
New York City	8419316	2022-03-13	Former VOC Omicron GRA (B.1.1.529+BA.*) first detected in Botswana/Hong Kong/South Africa	GRA	BA.1.1.16	1	Other
New York City	8419316	2022-03-20	Former VOC Omicron GRA (B.1.1.529+BA.*) first detected in Botswana/Hong Kong/South Africa	GRA	BA.1.1.16	1	Other
New York City	8419316	2022-04-17	Former VOC Omicron GRA (B.1.1.529+BA.*) first detected in Botswana/Hong Kong/South Africa	GRA	BA.1.1.16	3	Other
New York City	8419316	2022-05-08	Former VOC Omicron GRA (B.1.1.529+BA.*) first detected in Botswana/Hong Kong/South Africa	GRA	BA.1.1.16	1	Other
Western New York	1382480	2022-01-02	Former VOC Omicron GRA (B.1.1.529+BA.*) first detected in Botswana/Hong Kong/South Africa	GRA	BA.1.1.16	1	Other
Western New York	1382480	2022-01-16	Former VOC Omicron GRA (B.1.1.529+BA.*) first detected in Botswana/Hong Kong/South Africa	GRA	BA.1.1.16	2	Other
Western New York	1382480	2022-01-23	Former VOC Omicron GRA (B.1.1.529+BA.*) first detected in Botswana/Hong Kong/South Africa	GRA	BA.1.1.16	1	Other
Western New York	1382480	2022-02-06	Former VOC Omicron GRA (B.1.1.529+BA.*) first detected in Botswana/Hong Kong/South Africa	GRA	BA.1.1.16	1	Other
Ontario CA	14570000	2022-01-02	Former VOC Omicron GRA (B.1.1.529+BA.*) first detected in Botswana/Hong Kong/South Africa	GRA	BA.1.1.16	1	Other
Ontario CA	14570000	2022-01-09	Former VOC Omicron GRA (B.1.1.529+BA.*) first detected in Botswana/Hong Kong/South Africa	GRA	BA.1.1.16	1	Other
Ontario CA	14570000	2022-01-16	Former VOC Omicron GRA (B.1.1.529+BA.*) first detected in Botswana/Hong Kong/South Africa	GRA	BA.1.1.16	1	Other
Ontario CA	14570000	2022-02-06	Former VOC Omicron GRA (B.1.1.529+BA.*) first detected in Botswana/Hong Kong/South Africa	GRA	BA.1.1.16	4	Other
Ontario CA	14570000	2022-02-13	Former VOC Omicron GRA (B.1.1.529+BA.*) first detected in Botswana/Hong Kong/South Africa	GRA	BA.1.1.16	1	Other
Ontario CA	14570000	2022-02-20	Former VOC Omicron GRA (B.1.1.529+BA.*) first detected in Botswana/Hong Kong/South Africa	GRA	BA.1.1.16	4	Other
Ontario CA	14570000	2022-02-27	Former VOC Omicron GRA (B.1.1.529+BA.*) first detected in Botswana/Hong Kong/South Africa	GRA	BA.1.1.16	12	Other
Ontario CA	14570000	2022-03-06	Former VOC Omicron GRA (B.1.1.529+BA.*) first detected in Botswana/Hong Kong/South Africa	GRA	BA.1.1.16	9	Other
Ontario CA	14570000	2022-03-13	Former VOC Omicron GRA (B.1.1.529+BA.*) first detected in Botswana/Hong Kong/South Africa	GRA	BA.1.1.16	10	Other
Ontario CA	14570000	2022-03-20	Former VOC Omicron GRA (B.1.1.529+BA.*) first detected in Botswana/Hong Kong/South Africa	GRA	BA.1.1.16	4	Other
Ontario CA	14570000	2022-03-27	Former VOC Omicron GRA (B.1.1.529+BA.*) first detected in Botswana/Hong Kong/South Africa	GRA	BA.1.1.16	3	Other
Ontario CA	14570000	2022-04-03	Former VOC Omicron GRA (B.1.1.529+BA.*) first detected in Botswana/Hong Kong/South Africa	GRA	BA.1.1.16	3	Other
Ontario CA	14570000	2022-04-10	Former VOC Omicron GRA (B.1.1.529+BA.*) first detected in Botswana/Hong Kong/South Africa	GRA	BA.1.1.16	1	Other
Ontario CA	14570000	2022-04-17	Former VOC Omicron GRA (B.1.1.529+BA.*) first detected in Botswana/Hong Kong/South Africa	GRA	BA.1.1.16	2	Other
New York City	8419316	2022-01-02	Former VOC Omicron GRA (B.1.1.529+BA.*) first detected in Botswana/Hong Kong/South Africa	GRA	BA.1.1.17	5	Other
New York City	8419316	2022-01-30	Former VOC Omicron GRA (B.1.1.529+BA.*) first detected in Botswana/Hong Kong/South Africa	GRA	BA.1.1.17	1	Other
Ontario CA	14570000	2022-02-13	Former VOC Omicron GRA (B.1.1.529+BA.*) first detected in Botswana/Hong Kong/South Africa	GRA	BA.1.1.17	1	Other
Ontario CA	14570000	2022-03-06	Former VOC Omicron GRA (B.1.1.529+BA.*) first detected in Botswana/Hong Kong/South Africa	GRA	BA.1.1.17	1	Other
Ontario CA	14570000	2022-03-13	Former VOC Omicron GRA (B.1.1.529+BA.*) first detected in Botswana/Hong Kong/South Africa	GRA	BA.1.1.17	1	Other
Ontario CA	14570000	2022-03-20	Former VOC Omicron GRA (B.1.1.529+BA.*) first detected in Botswana/Hong Kong/South Africa	GRA	BA.1.1.17	2	Other
Capital Region	1083201	2022-01-09	Former VOC Omicron GRA (B.1.1.529+BA.*) first detected in Botswana/Hong Kong/South Africa	GRA	BA.1.1.2	1	Other
Central New York	777706	2022-01-02	Former VOC Omicron GRA (B.1.1.529+BA.*) first detected in Botswana/Hong Kong/South Africa	GRA	BA.1.1.2	1	Other
Finger Lakes	1205380	2022-01-23	Former VOC Omicron GRA (B.1.1.529+BA.*) first detected in Botswana/Hong Kong/South Africa	GRA	BA.1.1.2	2	Other
Finger Lakes	1205380	2022-03-13	Former VOC Omicron GRA (B.1.1.529+BA.*) first detected in Botswana/Hong Kong/South Africa	GRA	BA.1.1.2	1	Other
Finger Lakes	1205380	2022-03-27	Former VOC Omicron GRA (B.1.1.529+BA.*) first detected in Botswana/Hong Kong/South Africa	GRA	BA.1.1.2	1	Other
Finger Lakes	1205380	2022-04-03	Former VOC Omicron GRA (B.1.1.529+BA.*) first detected in Botswana/Hong Kong/South Africa	GRA	BA.1.1.2	1	Other
Mid-Hudson	2319719	2022-01-02	Former VOC Omicron GRA (B.1.1.529+BA.*) first detected in Botswana/Hong Kong/South Africa	GRA	BA.1.1.2	1	Other
Mid-Hudson	2319719	2022-01-23	Former VOC Omicron GRA (B.1.1.529+BA.*) first detected in Botswana/Hong Kong/South Africa	GRA	BA.1.1.2	1	Other
New York City	8419316	2022-01-02	Former VOC Omicron GRA (B.1.1.529+BA.*) first detected in Botswana/Hong Kong/South Africa	GRA	BA.1.1.2	8	Other
New York City	8419316	2022-01-09	Former VOC Omicron GRA (B.1.1.529+BA.*) first detected in Botswana/Hong Kong/South Africa	GRA	BA.1.1.2	12	Other
New York City	8419316	2022-01-16	Former VOC Omicron GRA (B.1.1.529+BA.*) first detected in Botswana/Hong Kong/South Africa	GRA	BA.1.1.2	7	Other
New York City	8419316	2022-01-23	Former VOC Omicron GRA (B.1.1.529+BA.*) first detected in Botswana/Hong Kong/South Africa	GRA	BA.1.1.2	8	Other
New York City	8419316	2022-01-30	Former VOC Omicron GRA (B.1.1.529+BA.*) first detected in Botswana/Hong Kong/South Africa	GRA	BA.1.1.2	9	Other
New York City	8419316	2022-02-06	Former VOC Omicron GRA (B.1.1.529+BA.*) first detected in Botswana/Hong Kong/South Africa	GRA	BA.1.1.2	4	Other
New York City	8419316	2022-02-13	Former VOC Omicron GRA (B.1.1.529+BA.*) first detected in Botswana/Hong Kong/South Africa	GRA	BA.1.1.2	5	Other
New York City	8419316	2022-02-20	Former VOC Omicron GRA (B.1.1.529+BA.*) first detected in Botswana/Hong Kong/South Africa	GRA	BA.1.1.2	2	Other
New York City	8419316	2022-02-27	Former VOC Omicron GRA (B.1.1.529+BA.*) first detected in Botswana/Hong Kong/South Africa	GRA	BA.1.1.2	3	Other
New York City	8419316	2022-03-06	Former VOC Omicron GRA (B.1.1.529+BA.*) first detected in Botswana/Hong Kong/South Africa	GRA	BA.1.1.2	2	Other
New York City	8419316	2022-03-13	Former VOC Omicron GRA (B.1.1.529+BA.*) first detected in Botswana/Hong Kong/South Africa	GRA	BA.1.1.2	1	Other
North Country	421361	2022-01-02	Former VOC Omicron GRA (B.1.1.529+BA.*) first detected in Botswana/Hong Kong/South Africa	GRA	BA.1.1.2	1	Other
Southern Tier	636657	2022-01-09	Former VOC Omicron GRA (B.1.1.529+BA.*) first detected in Botswana/Hong Kong/South Africa	GRA	BA.1.1.2	1	Other
Western New York	1382480	2022-01-02	Former VOC Omicron GRA (B.1.1.529+BA.*) first detected in Botswana/Hong Kong/South Africa	GRA	BA.1.1.2	4	Other
Western New York	1382480	2022-01-09	Former VOC Omicron GRA (B.1.1.529+BA.*) first detected in Botswana/Hong Kong/South Africa	GRA	BA.1.1.2	3	Other
Western New York	1382480	2022-01-16	Former VOC Omicron GRA (B.1.1.529+BA.*) first detected in Botswana/Hong Kong/South Africa	GRA	BA.1.1.2	1	Other
Western New York	1382480	2022-01-23	Former VOC Omicron GRA (B.1.1.529+BA.*) first detected in Botswana/Hong Kong/South Africa	GRA	BA.1.1.2	1	Other
Western New York	1382480	2022-01-30	Former VOC Omicron GRA (B.1.1.529+BA.*) first detected in Botswana/Hong Kong/South Africa	GRA	BA.1.1.2	2	Other
Western New York	1382480	2022-02-20	Former VOC Omicron GRA (B.1.1.529+BA.*) first detected in Botswana/Hong Kong/South Africa	GRA	BA.1.1.2	1	Other
Western New York	1382480	2022-03-27	Former VOC Omicron GRA (B.1.1.529+BA.*) first detected in Botswana/Hong Kong/South Africa	GRA	BA.1.1.2	1	Other
Ontario CA	14570000	2022-01-09	Former VOC Omicron GRA (B.1.1.529+BA.*) first detected in Botswana/Hong Kong/South Africa	GRA	BA.1.1.2	2	Other
Ontario CA	14570000	2022-01-30	Former VOC Omicron GRA (B.1.1.529+BA.*) first detected in Botswana/Hong Kong/South Africa	GRA	BA.1.1.2	2	Other
Ontario CA	14570000	2022-04-10	Former VOC Omicron GRA (B.1.1.529+BA.*) first detected in Botswana/Hong Kong/South Africa	GRA	BA.1.1.2	1	Other
New York City	8419316	2022-03-06	Former VOC Omicron GRA (B.1.1.529+BA.*) first detected in Botswana/Hong Kong/South Africa	GRA	BA.1.1.3	1	Other
New York City	8419316	2022-01-16	Former VOC Omicron GRA (B.1.1.529+BA.*) first detected in Botswana/Hong Kong/South Africa	GRA	BA.1.1.4	1	Other
New York City	8419316	2022-01-23	Former VOC Omicron GRA (B.1.1.529+BA.*) first detected in Botswana/Hong Kong/South Africa	GRA	BA.1.1.6	1	Other
New York City	8419316	2022-02-06	Former VOC Omicron GRA (B.1.1.529+BA.*) first detected in Botswana/Hong Kong/South Africa	GRA	BA.1.1.6	2	Other
Ontario CA	14570000	2022-01-02	Former VOC Omicron GRA (B.1.1.529+BA.*) first detected in Botswana/Hong Kong/South Africa	GRA	BA.1.1.6	1	Other
New York City	8419316	2022-01-02	Former VOC Omicron GRA (B.1.1.529+BA.*) first detected in Botswana/Hong Kong/South Africa	GRA	BA.1.1.7	1	Other
New York City	8419316	2022-01-09	Former VOC Omicron GRA (B.1.1.529+BA.*) first detected in Botswana/Hong Kong/South Africa	GRA	BA.1.1.7	2	Other
New York City	8419316	2022-01-23	Former VOC Omicron GRA (B.1.1.529+BA.*) first detected in Botswana/Hong Kong/South Africa	GRA	BA.1.1.7	3	Other
Ontario CA	14570000	2022-01-09	Former VOC Omicron GRA (B.1.1.529+BA.*) first detected in Botswana/Hong Kong/South Africa	GRA	BA.1.1.7	1	Other
Ontario CA	14570000	2022-01-16	Former VOC Omicron GRA (B.1.1.529+BA.*) first detected in Botswana/Hong Kong/South Africa	GRA	BA.1.1.7	1	Other
Ontario CA	14570000	2022-01-23	Former VOC Omicron GRA (B.1.1.529+BA.*) first detected in Botswana/Hong Kong/South Africa	GRA	BA.1.1.7	1	Other
Ontario CA	14570000	2022-01-30	Former VOC Omicron GRA (B.1.1.529+BA.*) first detected in Botswana/Hong Kong/South Africa	GRA	BA.1.1.7	1	Other
Ontario CA	14570000	2022-02-13	Former VOC Omicron GRA (B.1.1.529+BA.*) first detected in Botswana/Hong Kong/South Africa	GRA	BA.1.1.7	1	Other
Capital Region	1083201	2022-01-16	Former VOC Omicron GRA (B.1.1.529+BA.*) first detected in Botswana/Hong Kong/South Africa	GRA	BA.1.1.8	1	Other
Finger Lakes	1205380	2022-01-23	Former VOC Omicron GRA (B.1.1.529+BA.*) first detected in Botswana/Hong Kong/South Africa	GRA	BA.1.1.8	1	Other
Mid-Hudson	2319719	2022-01-16	Former VOC Omicron GRA (B.1.1.529+BA.*) first detected in Botswana/Hong Kong/South Africa	GRA	BA.1.1.8	1	Other
New York City	8419316	2022-01-09	Former VOC Omicron GRA (B.1.1.529+BA.*) first detected in Botswana/Hong Kong/South Africa	GRA	BA.1.1.8	1	Other
New York City	8419316	2022-01-16	Former VOC Omicron GRA (B.1.1.529+BA.*) first detected in Botswana/Hong Kong/South Africa	GRA	BA.1.1.8	3	Other
New York City	8419316	2022-01-30	Former VOC Omicron GRA (B.1.1.529+BA.*) first detected in Botswana/Hong Kong/South Africa	GRA	BA.1.1.8	2	Other
New York City	8419316	2022-03-06	Former VOC Omicron GRA (B.1.1.529+BA.*) first detected in Botswana/Hong Kong/South Africa	GRA	BA.1.1.8	1	Other
Western New York	1382480	2022-01-02	Former VOC Omicron GRA (B.1.1.529+BA.*) first detected in Botswana/Hong Kong/South Africa	GRA	BA.1.1.8	4	Other
Western New York	1382480	2022-01-09	Former VOC Omicron GRA (B.1.1.529+BA.*) first detected in Botswana/Hong Kong/South Africa	GRA	BA.1.1.8	1	Other
Western New York	1382480	2022-02-27	Former VOC Omicron GRA (B.1.1.529+BA.*) first detected in Botswana/Hong Kong/South Africa	GRA	BA.1.1.8	1	Other
Ontario CA	14570000	2022-01-09	Former VOC Omicron GRA (B.1.1.529+BA.*) first detected in Botswana/Hong Kong/South Africa	GRA	BA.1.1.8	1	Other
New York City	8419316	2022-01-16	Former VOC Omicron GRA (B.1.1.529+BA.*) first detected in Botswana/Hong Kong/South Africa	GRA	BA.1.1.9	3	Other
Finger Lakes	1205380	2022-02-13	Former VOC Omicron GRA (B.1.1.529+BA.*) first detected in Botswana/Hong Kong/South Africa	GRA	BA.1.10	1	Other
New York City	8419316	2022-02-20	Former VOC Omicron GRA (B.1.1.529+BA.*) first detected in Botswana/Hong Kong/South Africa	GRA	BA.1.10	1	Other
New York City	8419316	2022-02-27	Former VOC Omicron GRA (B.1.1.529+BA.*) first detected in Botswana/Hong Kong/South Africa	GRA	BA.1.10	2	Other
New York City	8419316	2022-01-09	Former VOC Omicron GRA (B.1.1.529+BA.*) first detected in Botswana/Hong Kong/South Africa	GRA	BA.1.12	1	Other
New York City	8419316	2022-01-02	Former VOC Omicron GRA (B.1.1.529+BA.*) first detected in Botswana/Hong Kong/South Africa	GRA	BA.1.13	6	Other
New York City	8419316	2022-01-09	Former VOC Omicron GRA (B.1.1.529+BA.*) first detected in Botswana/Hong Kong/South Africa	GRA	BA.1.13	6	Other
New York City	8419316	2022-01-16	Former VOC Omicron GRA (B.1.1.529+BA.*) first detected in Botswana/Hong Kong/South Africa	GRA	BA.1.13	3	Other
New York City	8419316	2022-01-23	Former VOC Omicron GRA (B.1.1.529+BA.*) first detected in Botswana/Hong Kong/South Africa	GRA	BA.1.13	3	Other
New York City	8419316	2022-01-30	Former VOC Omicron GRA (B.1.1.529+BA.*) first detected in Botswana/Hong Kong/South Africa	GRA	BA.1.13	1	Other
New York City	8419316	2022-02-06	Former VOC Omicron GRA (B.1.1.529+BA.*) first detected in Botswana/Hong Kong/South Africa	GRA	BA.1.13	1	Other
Ontario CA	14570000	2022-01-02	Former VOC Omicron GRA (B.1.1.529+BA.*) first detected in Botswana/Hong Kong/South Africa	GRA	BA.1.13	10	Other
Ontario CA	14570000	2022-01-09	Former VOC Omicron GRA (B.1.1.529+BA.*) first detected in Botswana/Hong Kong/South Africa	GRA	BA.1.13	4	Other
Ontario CA	14570000	2022-01-23	Former VOC Omicron GRA (B.1.1.529+BA.*) first detected in Botswana/Hong Kong/South Africa	GRA	BA.1.13	1	Other
Ontario CA	14570000	2022-01-30	Former VOC Omicron GRA (B.1.1.529+BA.*) first detected in Botswana/Hong Kong/South Africa	GRA	BA.1.13	1	Other
Ontario CA	14570000	2022-02-13	Former VOC Omicron GRA (B.1.1.529+BA.*) first detected in Botswana/Hong Kong/South Africa	GRA	BA.1.13	1	Other
Ontario CA	14570000	2022-02-20	Former VOC Omicron GRA (B.1.1.529+BA.*) first detected in Botswana/Hong Kong/South Africa	GRA	BA.1.13	1	Other
Ontario CA	14570000	2022-02-20	Former VOC Omicron GRA (B.1.1.529+BA.*) first detected in Botswana/Hong Kong/South Africa	GRA	BA.1.13.1	1	Other
New York City	8419316	2022-01-02	Former VOC Omicron GRA (B.1.1.529+BA.*) first detected in Botswana/Hong Kong/South Africa	GRA	BA.1.14	1	Other
New York City	8419316	2022-01-16	Former VOC Omicron GRA (B.1.1.529+BA.*) first detected in Botswana/Hong Kong/South Africa	GRA	BA.1.14	1	Other
New York City	8419316	2022-01-23	Former VOC Omicron GRA (B.1.1.529+BA.*) first detected in Botswana/Hong Kong/South Africa	GRA	BA.1.14	1	Other
New York City	8419316	2022-01-30	Former VOC Omicron GRA (B.1.1.529+BA.*) first detected in Botswana/Hong Kong/South Africa	GRA	BA.1.14	4	Other
Western New York	1382480	2022-01-30	Former VOC Omicron GRA (B.1.1.529+BA.*) first detected in Botswana/Hong Kong/South Africa	GRA	BA.1.14	1	Other
Ontario CA	14570000	2022-01-02	Former VOC Omicron GRA (B.1.1.529+BA.*) first detected in Botswana/Hong Kong/South Africa	GRA	BA.1.14	1	Other
Ontario CA	14570000	2022-01-09	Former VOC Omicron GRA (B.1.1.529+BA.*) first detected in Botswana/Hong Kong/South Africa	GRA	BA.1.14	1	Other
Ontario CA	14570000	2022-01-16	Former VOC Omicron GRA (B.1.1.529+BA.*) first detected in Botswana/Hong Kong/South Africa	GRA	BA.1.14	2	Other
Ontario CA	14570000	2022-01-30	Former VOC Omicron GRA (B.1.1.529+BA.*) first detected in Botswana/Hong Kong/South Africa	GRA	BA.1.14	3	Other
Ontario CA	14570000	2022-02-06	Former VOC Omicron GRA (B.1.1.529+BA.*) first detected in Botswana/Hong Kong/South Africa	GRA	BA.1.14	2	Other
Ontario CA	14570000	2022-02-13	Former VOC Omicron GRA (B.1.1.529+BA.*) first detected in Botswana/Hong Kong/South Africa	GRA	BA.1.14	5	Other
Ontario CA	14570000	2022-02-20	Former VOC Omicron GRA (B.1.1.529+BA.*) first detected in Botswana/Hong Kong/South Africa	GRA	BA.1.14	7	Other
Ontario CA	14570000	2022-02-27	Former VOC Omicron GRA (B.1.1.529+BA.*) first detected in Botswana/Hong Kong/South Africa	GRA	BA.1.14	8	Other
Ontario CA	14570000	2022-03-06	Former VOC Omicron GRA (B.1.1.529+BA.*) first detected in Botswana/Hong Kong/South Africa	GRA	BA.1.14	8	Other
Ontario CA	14570000	2022-03-13	Former VOC Omicron GRA (B.1.1.529+BA.*) first detected in Botswana/Hong Kong/South Africa	GRA	BA.1.14	8	Other
Ontario CA	14570000	2022-03-20	Former VOC Omicron GRA (B.1.1.529+BA.*) first detected in Botswana/Hong Kong/South Africa	GRA	BA.1.14	10	Other
Ontario CA	14570000	2022-03-27	Former VOC Omicron GRA (B.1.1.529+BA.*) first detected in Botswana/Hong Kong/South Africa	GRA	BA.1.14	5	Other
Ontario CA	14570000	2022-04-03	Former VOC Omicron GRA (B.1.1.529+BA.*) first detected in Botswana/Hong Kong/South Africa	GRA	BA.1.14	1	Other
Ontario CA	14570000	2022-04-17	Former VOC Omicron GRA (B.1.1.529+BA.*) first detected in Botswana/Hong Kong/South Africa	GRA	BA.1.14	1	Other
Ontario CA	14570000	2022-04-24	Former VOC Omicron GRA (B.1.1.529+BA.*) first detected in Botswana/Hong Kong/South Africa	GRA	BA.1.14	1	Other
New York City	8419316	2022-01-23	Former VOC Omicron GRA (B.1.1.529+BA.*) first detected in Botswana/Hong Kong/South Africa	GRA	BA.1.14.1	1	Other
New York City	8419316	2022-01-30	Former VOC Omicron GRA (B.1.1.529+BA.*) first detected in Botswana/Hong Kong/South Africa	GRA	BA.1.14.1	3	Other
New York City	8419316	2022-02-06	Former VOC Omicron GRA (B.1.1.529+BA.*) first detected in Botswana/Hong Kong/South Africa	GRA	BA.1.14.1	3	Other
New York City	8419316	2022-02-13	Former VOC Omicron GRA (B.1.1.529+BA.*) first detected in Botswana/Hong Kong/South Africa	GRA	BA.1.14.1	1	Other
Ontario CA	14570000	2022-01-16	Former VOC Omicron GRA (B.1.1.529+BA.*) first detected in Botswana/Hong Kong/South Africa	GRA	BA.1.14.2	1	Other
Mid-Hudson	2319719	2022-01-09	Former VOC Omicron GRA (B.1.1.529+BA.*) first detected in Botswana/Hong Kong/South Africa	GRA	BA.1.15.1	1	Other
New York City	8419316	2022-01-02	Former VOC Omicron GRA (B.1.1.529+BA.*) first detected in Botswana/Hong Kong/South Africa	GRA	BA.1.15.1	2	Other
New York City	8419316	2022-01-09	Former VOC Omicron GRA (B.1.1.529+BA.*) first detected in Botswana/Hong Kong/South Africa	GRA	BA.1.15.1	2	Other
New York City	8419316	2022-01-16	Former VOC Omicron GRA (B.1.1.529+BA.*) first detected in Botswana/Hong Kong/South Africa	GRA	BA.1.15.1	6	Other
New York City	8419316	2022-01-23	Former VOC Omicron GRA (B.1.1.529+BA.*) first detected in Botswana/Hong Kong/South Africa	GRA	BA.1.15.1	2	Other
New York City	8419316	2022-01-30	Former VOC Omicron GRA (B.1.1.529+BA.*) first detected in Botswana/Hong Kong/South Africa	GRA	BA.1.15.1	4	Other
New York City	8419316	2022-02-13	Former VOC Omicron GRA (B.1.1.529+BA.*) first detected in Botswana/Hong Kong/South Africa	GRA	BA.1.15.1	3	Other
Southern Tier	636657	2022-01-02	Former VOC Omicron GRA (B.1.1.529+BA.*) first detected in Botswana/Hong Kong/South Africa	GRA	BA.1.15.1	1	Other
Ontario CA	14570000	2022-01-02	Former VOC Omicron GRA (B.1.1.529+BA.*) first detected in Botswana/Hong Kong/South Africa	GRA	BA.1.15.1	2	Other
Ontario CA	14570000	2022-01-09	Former VOC Omicron GRA (B.1.1.529+BA.*) first detected in Botswana/Hong Kong/South Africa	GRA	BA.1.15.1	3	Other
Ontario CA	14570000	2022-01-16	Former VOC Omicron GRA (B.1.1.529+BA.*) first detected in Botswana/Hong Kong/South Africa	GRA	BA.1.15.1	1	Other
Ontario CA	14570000	2022-02-20	Former VOC Omicron GRA (B.1.1.529+BA.*) first detected in Botswana/Hong Kong/South Africa	GRA	BA.1.15.1	3	Other
Capital Region	1083201	2022-01-23	Former VOC Omicron GRA (B.1.1.529+BA.*) first detected in Botswana/Hong Kong/South Africa	GRA	BA.1.15.2	1	Other
Capital Region	1083201	2022-02-13	Former VOC Omicron GRA (B.1.1.529+BA.*) first detected in Botswana/Hong Kong/South Africa	GRA	BA.1.15.2	1	Other
Central New York	777706	2022-04-03	Former VOC Omicron GRA (B.1.1.529+BA.*) first detected in Botswana/Hong Kong/South Africa	GRA	BA.1.15.2	1	Other
New York City	8419316	2022-01-16	Former VOC Omicron GRA (B.1.1.529+BA.*) first detected in Botswana/Hong Kong/South Africa	GRA	BA.1.15.2	1	Other
New York City	8419316	2022-01-23	Former VOC Omicron GRA (B.1.1.529+BA.*) first detected in Botswana/Hong Kong/South Africa	GRA	BA.1.15.2	2	Other
New York City	8419316	2022-01-30	Former VOC Omicron GRA (B.1.1.529+BA.*) first detected in Botswana/Hong Kong/South Africa	GRA	BA.1.15.2	3	Other
New York City	8419316	2022-02-06	Former VOC Omicron GRA (B.1.1.529+BA.*) first detected in Botswana/Hong Kong/South Africa	GRA	BA.1.15.2	2	Other
New York City	8419316	2022-02-13	Former VOC Omicron GRA (B.1.1.529+BA.*) first detected in Botswana/Hong Kong/South Africa	GRA	BA.1.15.2	1	Other
New York City	8419316	2022-02-20	Former VOC Omicron GRA (B.1.1.529+BA.*) first detected in Botswana/Hong Kong/South Africa	GRA	BA.1.15.2	7	Other
New York City	8419316	2022-02-27	Former VOC Omicron GRA (B.1.1.529+BA.*) first detected in Botswana/Hong Kong/South Africa	GRA	BA.1.15.2	1	Other
New York City	8419316	2022-03-13	Former VOC Omicron GRA (B.1.1.529+BA.*) first detected in Botswana/Hong Kong/South Africa	GRA	BA.1.15.2	2	Other
New York City	8419316	2022-03-20	Former VOC Omicron GRA (B.1.1.529+BA.*) first detected in Botswana/Hong Kong/South Africa	GRA	BA.1.15.2	2	Other
New York City	8419316	2022-03-27	Former VOC Omicron GRA (B.1.1.529+BA.*) first detected in Botswana/Hong Kong/South Africa	GRA	BA.1.15.2	4	Other
Ontario CA	14570000	2022-01-09	Former VOC Omicron GRA (B.1.1.529+BA.*) first detected in Botswana/Hong Kong/South Africa	GRA	BA.1.15.2	1	Other
Ontario CA	14570000	2022-02-06	Former VOC Omicron GRA (B.1.1.529+BA.*) first detected in Botswana/Hong Kong/South Africa	GRA	BA.1.15.2	1	Other
Ontario CA	14570000	2022-02-13	Former VOC Omicron GRA (B.1.1.529+BA.*) first detected in Botswana/Hong Kong/South Africa	GRA	BA.1.15.2	1	Other
New York City	8419316	2022-01-02	Former VOC Omicron GRA (B.1.1.529+BA.*) first detected in Botswana/Hong Kong/South Africa	GRA	BA.1.15.3	1	Other
New York City	8419316	2022-01-09	Former VOC Omicron GRA (B.1.1.529+BA.*) first detected in Botswana/Hong Kong/South Africa	GRA	BA.1.15.3	1	Other
Ontario CA	14570000	2022-02-20	Former VOC Omicron GRA (B.1.1.529+BA.*) first detected in Botswana/Hong Kong/South Africa	GRA	BA.1.16	1	Other
Capital Region	1083201	2022-01-02	Former VOC Omicron GRA (B.1.1.529+BA.*) first detected in Botswana/Hong Kong/South Africa	GRA	BA.1.17	2	Other
Capital Region	1083201	2022-01-09	Former VOC Omicron GRA (B.1.1.529+BA.*) first detected in Botswana/Hong Kong/South Africa	GRA	BA.1.17	1	Other
Capital Region	1083201	2022-01-16	Former VOC Omicron GRA (B.1.1.529+BA.*) first detected in Botswana/Hong Kong/South Africa	GRA	BA.1.17	2	Other
Central New York	777706	2022-01-02	Former VOC Omicron GRA (B.1.1.529+BA.*) first detected in Botswana/Hong Kong/South Africa	GRA	BA.1.17	1	Other
Central New York	777706	2022-01-23	Former VOC Omicron GRA (B.1.1.529+BA.*) first detected in Botswana/Hong Kong/South Africa	GRA	BA.1.17	1	Other
Finger Lakes	1205380	2022-01-16	Former VOC Omicron GRA (B.1.1.529+BA.*) first detected in Botswana/Hong Kong/South Africa	GRA	BA.1.17	1	Other
Finger Lakes	1205380	2022-01-23	Former VOC Omicron GRA (B.1.1.529+BA.*) first detected in Botswana/Hong Kong/South Africa	GRA	BA.1.17	1	Other
Finger Lakes	1205380	2022-02-06	Former VOC Omicron GRA (B.1.1.529+BA.*) first detected in Botswana/Hong Kong/South Africa	GRA	BA.1.17	1	Other
Mid-Hudson	2319719	2022-01-02	Former VOC Omicron GRA (B.1.1.529+BA.*) first detected in Botswana/Hong Kong/South Africa	GRA	BA.1.17	4	Other
Mid-Hudson	2319719	2022-01-09	Former VOC Omicron GRA (B.1.1.529+BA.*) first detected in Botswana/Hong Kong/South Africa	GRA	BA.1.17	1	Other
Mid-Hudson	2319719	2022-01-16	Former VOC Omicron GRA (B.1.1.529+BA.*) first detected in Botswana/Hong Kong/South Africa	GRA	BA.1.17	2	Other
Mid-Hudson	2319719	2022-01-30	Former VOC Omicron GRA (B.1.1.529+BA.*) first detected in Botswana/Hong Kong/South Africa	GRA	BA.1.17	1	Other
New York City	8419316	2022-01-02	Former VOC Omicron GRA (B.1.1.529+BA.*) first detected in Botswana/Hong Kong/South Africa	GRA	BA.1.17	72	Other
New York City	8419316	2022-01-09	Former VOC Omicron GRA (B.1.1.529+BA.*) first detected in Botswana/Hong Kong/South Africa	GRA	BA.1.17	73	Other
New York City	8419316	2022-01-16	Former VOC Omicron GRA (B.1.1.529+BA.*) first detected in Botswana/Hong Kong/South Africa	GRA	BA.1.17	41	Other
New York City	8419316	2022-01-23	Former VOC Omicron GRA (B.1.1.529+BA.*) first detected in Botswana/Hong Kong/South Africa	GRA	BA.1.17	24	Other
New York City	8419316	2022-01-30	Former VOC Omicron GRA (B.1.1.529+BA.*) first detected in Botswana/Hong Kong/South Africa	GRA	BA.1.17	14	Other
New York City	8419316	2022-02-06	Former VOC Omicron GRA (B.1.1.529+BA.*) first detected in Botswana/Hong Kong/South Africa	GRA	BA.1.17	11	Other
New York City	8419316	2022-02-13	Former VOC Omicron GRA (B.1.1.529+BA.*) first detected in Botswana/Hong Kong/South Africa	GRA	BA.1.17	2	Other
New York City	8419316	2022-02-20	Former VOC Omicron GRA (B.1.1.529+BA.*) first detected in Botswana/Hong Kong/South Africa	GRA	BA.1.17	1	Other
New York City	8419316	2022-02-27	Former VOC Omicron GRA (B.1.1.529+BA.*) first detected in Botswana/Hong Kong/South Africa	GRA	BA.1.17	2	Other
New York City	8419316	2022-03-06	Former VOC Omicron GRA (B.1.1.529+BA.*) first detected in Botswana/Hong Kong/South Africa	GRA	BA.1.17	2	Other
New York City	8419316	2022-03-20	Former VOC Omicron GRA (B.1.1.529+BA.*) first detected in Botswana/Hong Kong/South Africa	GRA	BA.1.17	2	Other
New York City	8419316	2022-04-03	Former VOC Omicron GRA (B.1.1.529+BA.*) first detected in Botswana/Hong Kong/South Africa	GRA	BA.1.17	1	Other
New York City	8419316	2022-04-17	Former VOC Omicron GRA (B.1.1.529+BA.*) first detected in Botswana/Hong Kong/South Africa	GRA	BA.1.17	1	Other
North Country	421361	2022-01-02	Former VOC Omicron GRA (B.1.1.529+BA.*) first detected in Botswana/Hong Kong/South Africa	GRA	BA.1.17	1	Other
Southern Tier	636657	2022-01-23	Former VOC Omicron GRA (B.1.1.529+BA.*) first detected in Botswana/Hong Kong/South Africa	GRA	BA.1.17	1	Other
Southern Tier	636657	2022-01-30	Former VOC Omicron GRA (B.1.1.529+BA.*) first detected in Botswana/Hong Kong/South Africa	GRA	BA.1.17	1	Other
Western New York	1382480	2022-01-09	Former VOC Omicron GRA (B.1.1.529+BA.*) first detected in Botswana/Hong Kong/South Africa	GRA	BA.1.17	1	Other
Western New York	1382480	2022-01-23	Former VOC Omicron GRA (B.1.1.529+BA.*) first detected in Botswana/Hong Kong/South Africa	GRA	BA.1.17	1	Other
Ontario CA	14570000	2022-01-02	Former VOC Omicron GRA (B.1.1.529+BA.*) first detected in Botswana/Hong Kong/South Africa	GRA	BA.1.17	35	Other
Ontario CA	14570000	2022-01-09	Former VOC Omicron GRA (B.1.1.529+BA.*) first detected in Botswana/Hong Kong/South Africa	GRA	BA.1.17	41	Other
Ontario CA	14570000	2022-01-16	Former VOC Omicron GRA (B.1.1.529+BA.*) first detected in Botswana/Hong Kong/South Africa	GRA	BA.1.17	20	Other
Ontario CA	14570000	2022-01-23	Former VOC Omicron GRA (B.1.1.529+BA.*) first detected in Botswana/Hong Kong/South Africa	GRA	BA.1.17	7	Other
Ontario CA	14570000	2022-01-30	Former VOC Omicron GRA (B.1.1.529+BA.*) first detected in Botswana/Hong Kong/South Africa	GRA	BA.1.17	8	Other
Ontario CA	14570000	2022-02-06	Former VOC Omicron GRA (B.1.1.529+BA.*) first detected in Botswana/Hong Kong/South Africa	GRA	BA.1.17	6	Other
Ontario CA	14570000	2022-02-13	Former VOC Omicron GRA (B.1.1.529+BA.*) first detected in Botswana/Hong Kong/South Africa	GRA	BA.1.17	7	Other
Ontario CA	14570000	2022-02-20	Former VOC Omicron GRA (B.1.1.529+BA.*) first detected in Botswana/Hong Kong/South Africa	GRA	BA.1.17	4	Other
Ontario CA	14570000	2022-02-27	Former VOC Omicron GRA (B.1.1.529+BA.*) first detected in Botswana/Hong Kong/South Africa	GRA	BA.1.17	3	Other
Ontario CA	14570000	2022-03-06	Former VOC Omicron GRA (B.1.1.529+BA.*) first detected in Botswana/Hong Kong/South Africa	GRA	BA.1.17	6	Other
Ontario CA	14570000	2022-03-13	Former VOC Omicron GRA (B.1.1.529+BA.*) first detected in Botswana/Hong Kong/South Africa	GRA	BA.1.17	8	Other
Ontario CA	14570000	2022-03-20	Former VOC Omicron GRA (B.1.1.529+BA.*) first detected in Botswana/Hong Kong/South Africa	GRA	BA.1.17	4	Other
Ontario CA	14570000	2022-04-03	Former VOC Omicron GRA (B.1.1.529+BA.*) first detected in Botswana/Hong Kong/South Africa	GRA	BA.1.17	1	Other
New York City	8419316	2022-01-16	Former VOC Omicron GRA (B.1.1.529+BA.*) first detected in Botswana/Hong Kong/South Africa	GRA	BA.1.17.1	1	Other
Capital Region	1083201	2022-01-09	Former VOC Omicron GRA (B.1.1.529+BA.*) first detected in Botswana/Hong Kong/South Africa	GRA	BA.1.18	1	Other
Capital Region	1083201	2022-01-16	Former VOC Omicron GRA (B.1.1.529+BA.*) first detected in Botswana/Hong Kong/South Africa	GRA	BA.1.18	3	Other
Capital Region	1083201	2022-01-23	Former VOC Omicron GRA (B.1.1.529+BA.*) first detected in Botswana/Hong Kong/South Africa	GRA	BA.1.18	1	Other
Central New York	777706	2022-01-02	Former VOC Omicron GRA (B.1.1.529+BA.*) first detected in Botswana/Hong Kong/South Africa	GRA	BA.1.18	1	Other
Central New York	777706	2022-01-16	Former VOC Omicron GRA (B.1.1.529+BA.*) first detected in Botswana/Hong Kong/South Africa	GRA	BA.1.18	1	Other
Finger Lakes	1205380	2022-01-09	Former VOC Omicron GRA (B.1.1.529+BA.*) first detected in Botswana/Hong Kong/South Africa	GRA	BA.1.18	1	Other
Finger Lakes	1205380	2022-01-16	Former VOC Omicron GRA (B.1.1.529+BA.*) first detected in Botswana/Hong Kong/South Africa	GRA	BA.1.18	1	Other
Finger Lakes	1205380	2022-01-23	Former VOC Omicron GRA (B.1.1.529+BA.*) first detected in Botswana/Hong Kong/South Africa	GRA	BA.1.18	2	Other
Finger Lakes	1205380	2022-01-30	Former VOC Omicron GRA (B.1.1.529+BA.*) first detected in Botswana/Hong Kong/South Africa	GRA	BA.1.18	3	Other
Finger Lakes	1205380	2022-02-13	Former VOC Omicron GRA (B.1.1.529+BA.*) first detected in Botswana/Hong Kong/South Africa	GRA	BA.1.18	1	Other
Finger Lakes	1205380	2022-02-20	Former VOC Omicron GRA (B.1.1.529+BA.*) first detected in Botswana/Hong Kong/South Africa	GRA	BA.1.18	2	Other
Long Island	2840341	2022-01-02	Former VOC Omicron GRA (B.1.1.529+BA.*) first detected in Botswana/Hong Kong/South Africa	GRA	BA.1.18	2	Other
Long Island	2840341	2022-01-09	Former VOC Omicron GRA (B.1.1.529+BA.*) first detected in Botswana/Hong Kong/South Africa	GRA	BA.1.18	1	Other
Mid-Hudson	2319719	2022-01-02	Former VOC Omicron GRA (B.1.1.529+BA.*) first detected in Botswana/Hong Kong/South Africa	GRA	BA.1.18	4	Other
Mid-Hudson	2319719	2022-01-09	Former VOC Omicron GRA (B.1.1.529+BA.*) first detected in Botswana/Hong Kong/South Africa	GRA	BA.1.18	3	Other
Mid-Hudson	2319719	2022-01-16	Former VOC Omicron GRA (B.1.1.529+BA.*) first detected in Botswana/Hong Kong/South Africa	GRA	BA.1.18	1	Other
Mid-Hudson	2319719	2022-01-23	Former VOC Omicron GRA (B.1.1.529+BA.*) first detected in Botswana/Hong Kong/South Africa	GRA	BA.1.18	1	Other
New York City	8419316	2022-01-02	Former VOC Omicron GRA (B.1.1.529+BA.*) first detected in Botswana/Hong Kong/South Africa	GRA	BA.1.18	148	Other
New York City	8419316	2022-01-09	Former VOC Omicron GRA (B.1.1.529+BA.*) first detected in Botswana/Hong Kong/South Africa	GRA	BA.1.18	110	Other
New York City	8419316	2022-01-16	Former VOC Omicron GRA (B.1.1.529+BA.*) first detected in Botswana/Hong Kong/South Africa	GRA	BA.1.18	89	Other
New York City	8419316	2022-01-23	Former VOC Omicron GRA (B.1.1.529+BA.*) first detected in Botswana/Hong Kong/South Africa	GRA	BA.1.18	85	Other
New York City	8419316	2022-01-30	Former VOC Omicron GRA (B.1.1.529+BA.*) first detected in Botswana/Hong Kong/South Africa	GRA	BA.1.18	75	Other
New York City	8419316	2022-02-06	Former VOC Omicron GRA (B.1.1.529+BA.*) first detected in Botswana/Hong Kong/South Africa	GRA	BA.1.18	28	Other
New York City	8419316	2022-02-13	Former VOC Omicron GRA (B.1.1.529+BA.*) first detected in Botswana/Hong Kong/South Africa	GRA	BA.1.18	29	Other
New York City	8419316	2022-02-20	Former VOC Omicron GRA (B.1.1.529+BA.*) first detected in Botswana/Hong Kong/South Africa	GRA	BA.1.18	23	Other
New York City	8419316	2022-02-27	Former VOC Omicron GRA (B.1.1.529+BA.*) first detected in Botswana/Hong Kong/South Africa	GRA	BA.1.18	16	Other
New York City	8419316	2022-03-06	Former VOC Omicron GRA (B.1.1.529+BA.*) first detected in Botswana/Hong Kong/South Africa	GRA	BA.1.18	17	Other
New York City	8419316	2022-03-13	Former VOC Omicron GRA (B.1.1.529+BA.*) first detected in Botswana/Hong Kong/South Africa	GRA	BA.1.18	7	Other
New York City	8419316	2022-03-20	Former VOC Omicron GRA (B.1.1.529+BA.*) first detected in Botswana/Hong Kong/South Africa	GRA	BA.1.18	3	Other
New York City	8419316	2022-03-27	Former VOC Omicron GRA (B.1.1.529+BA.*) first detected in Botswana/Hong Kong/South Africa	GRA	BA.1.18	2	Other
New York City	8419316	2022-04-03	Former VOC Omicron GRA (B.1.1.529+BA.*) first detected in Botswana/Hong Kong/South Africa	GRA	BA.1.18	3	Other
New York City	8419316	2022-04-10	Former VOC Omicron GRA (B.1.1.529+BA.*) first detected in Botswana/Hong Kong/South Africa	GRA	BA.1.18	1	Other
Southern Tier	636657	2022-01-16	Former VOC Omicron GRA (B.1.1.529+BA.*) first detected in Botswana/Hong Kong/South Africa	GRA	BA.1.18	1	Other
Southern Tier	636657	2022-01-30	Former VOC Omicron GRA (B.1.1.529+BA.*) first detected in Botswana/Hong Kong/South Africa	GRA	BA.1.18	1	Other
Western New York	1382480	2022-01-02	Former VOC Omicron GRA (B.1.1.529+BA.*) first detected in Botswana/Hong Kong/South Africa	GRA	BA.1.18	2	Other
Western New York	1382480	2022-01-09	Former VOC Omicron GRA (B.1.1.529+BA.*) first detected in Botswana/Hong Kong/South Africa	GRA	BA.1.18	3	Other
Western New York	1382480	2022-01-16	Former VOC Omicron GRA (B.1.1.529+BA.*) first detected in Botswana/Hong Kong/South Africa	GRA	BA.1.18	3	Other
Western New York	1382480	2022-01-30	Former VOC Omicron GRA (B.1.1.529+BA.*) first detected in Botswana/Hong Kong/South Africa	GRA	BA.1.18	2	Other
Western New York	1382480	2022-02-06	Former VOC Omicron GRA (B.1.1.529+BA.*) first detected in Botswana/Hong Kong/South Africa	GRA	BA.1.18	2	Other
Western New York	1382480	2022-02-13	Former VOC Omicron GRA (B.1.1.529+BA.*) first detected in Botswana/Hong Kong/South Africa	GRA	BA.1.18	1	Other
Western New York	1382480	2022-02-27	Former VOC Omicron GRA (B.1.1.529+BA.*) first detected in Botswana/Hong Kong/South Africa	GRA	BA.1.18	1	Other
Ontario CA	14570000	2022-01-02	Former VOC Omicron GRA (B.1.1.529+BA.*) first detected in Botswana/Hong Kong/South Africa	GRA	BA.1.18	8	Other
Ontario CA	14570000	2022-01-09	Former VOC Omicron GRA (B.1.1.529+BA.*) first detected in Botswana/Hong Kong/South Africa	GRA	BA.1.18	13	Other
Ontario CA	14570000	2022-01-16	Former VOC Omicron GRA (B.1.1.529+BA.*) first detected in Botswana/Hong Kong/South Africa	GRA	BA.1.18	8	Other
Ontario CA	14570000	2022-01-23	Former VOC Omicron GRA (B.1.1.529+BA.*) first detected in Botswana/Hong Kong/South Africa	GRA	BA.1.18	6	Other
Ontario CA	14570000	2022-01-30	Former VOC Omicron GRA (B.1.1.529+BA.*) first detected in Botswana/Hong Kong/South Africa	GRA	BA.1.18	1	Other
Ontario CA	14570000	2022-02-06	Former VOC Omicron GRA (B.1.1.529+BA.*) first detected in Botswana/Hong Kong/South Africa	GRA	BA.1.18	2	Other
Ontario CA	14570000	2022-02-20	Former VOC Omicron GRA (B.1.1.529+BA.*) first detected in Botswana/Hong Kong/South Africa	GRA	BA.1.18	2	Other
Ontario CA	14570000	2022-02-27	Former VOC Omicron GRA (B.1.1.529+BA.*) first detected in Botswana/Hong Kong/South Africa	GRA	BA.1.18	1	Other
Ontario CA	14570000	2022-03-06	Former VOC Omicron GRA (B.1.1.529+BA.*) first detected in Botswana/Hong Kong/South Africa	GRA	BA.1.18	3	Other
Ontario CA	14570000	2022-03-20	Former VOC Omicron GRA (B.1.1.529+BA.*) first detected in Botswana/Hong Kong/South Africa	GRA	BA.1.18	3	Other
Ontario CA	14570000	2022-03-27	Former VOC Omicron GRA (B.1.1.529+BA.*) first detected in Botswana/Hong Kong/South Africa	GRA	BA.1.18	2	Other
Ontario CA	14570000	2022-04-03	Former VOC Omicron GRA (B.1.1.529+BA.*) first detected in Botswana/Hong Kong/South Africa	GRA	BA.1.18	1	Other
Ontario CA	14570000	2022-04-24	Former VOC Omicron GRA (B.1.1.529+BA.*) first detected in Botswana/Hong Kong/South Africa	GRA	BA.1.18	1	Other
Ontario CA	14570000	2022-07-03	Former VOC Omicron GRA (B.1.1.529+BA.*) first detected in Botswana/Hong Kong/South Africa	GRA	BA.1.18	1	Other
Capital Region	1083201	2022-01-23	Former VOC Omicron GRA (B.1.1.529+BA.*) first detected in Botswana/Hong Kong/South Africa	GRA	BA.1.19	2	Other
Mid-Hudson	2319719	2022-01-02	Former VOC Omicron GRA (B.1.1.529+BA.*) first detected in Botswana/Hong Kong/South Africa	GRA	BA.1.19	1	Other
New York City	8419316	2022-01-02	Former VOC Omicron GRA (B.1.1.529+BA.*) first detected in Botswana/Hong Kong/South Africa	GRA	BA.1.19	4	Other
New York City	8419316	2022-01-09	Former VOC Omicron GRA (B.1.1.529+BA.*) first detected in Botswana/Hong Kong/South Africa	GRA	BA.1.19	3	Other
New York City	8419316	2022-01-16	Former VOC Omicron GRA (B.1.1.529+BA.*) first detected in Botswana/Hong Kong/South Africa	GRA	BA.1.19	1	Other
New York City	8419316	2022-01-23	Former VOC Omicron GRA (B.1.1.529+BA.*) first detected in Botswana/Hong Kong/South Africa	GRA	BA.1.19	3	Other
New York City	8419316	2022-01-30	Former VOC Omicron GRA (B.1.1.529+BA.*) first detected in Botswana/Hong Kong/South Africa	GRA	BA.1.19	2	Other
New York City	8419316	2022-02-06	Former VOC Omicron GRA (B.1.1.529+BA.*) first detected in Botswana/Hong Kong/South Africa	GRA	BA.1.19	2	Other
New York City	8419316	2022-02-27	Former VOC Omicron GRA (B.1.1.529+BA.*) first detected in Botswana/Hong Kong/South Africa	GRA	BA.1.19	1	Other
Western New York	1382480	2022-01-09	Former VOC Omicron GRA (B.1.1.529+BA.*) first detected in Botswana/Hong Kong/South Africa	GRA	BA.1.19	1	Other
Ontario CA	14570000	2022-01-09	Former VOC Omicron GRA (B.1.1.529+BA.*) first detected in Botswana/Hong Kong/South Africa	GRA	BA.1.19	2	Other
Ontario CA	14570000	2022-01-16	Former VOC Omicron GRA (B.1.1.529+BA.*) first detected in Botswana/Hong Kong/South Africa	GRA	BA.1.19	1	Other
Ontario CA	14570000	2022-01-23	Former VOC Omicron GRA (B.1.1.529+BA.*) first detected in Botswana/Hong Kong/South Africa	GRA	BA.1.19	1	Other
Ontario CA	14570000	2022-02-13	Former VOC Omicron GRA (B.1.1.529+BA.*) first detected in Botswana/Hong Kong/South Africa	GRA	BA.1.19	1	Other
Ontario CA	14570000	2022-02-20	Former VOC Omicron GRA (B.1.1.529+BA.*) first detected in Botswana/Hong Kong/South Africa	GRA	BA.1.19	2	Other
Ontario CA	14570000	2022-03-13	Former VOC Omicron GRA (B.1.1.529+BA.*) first detected in Botswana/Hong Kong/South Africa	GRA	BA.1.19	1	Other
Capital Region	1083201	2022-01-02	Former VOC Omicron GRA (B.1.1.529+BA.*) first detected in Botswana/Hong Kong/South Africa	GRA	BA.1.20	2	Other
Capital Region	1083201	2022-01-09	Former VOC Omicron GRA (B.1.1.529+BA.*) first detected in Botswana/Hong Kong/South Africa	GRA	BA.1.20	1	Other
Capital Region	1083201	2022-01-16	Former VOC Omicron GRA (B.1.1.529+BA.*) first detected in Botswana/Hong Kong/South Africa	GRA	BA.1.20	1	Other
Central New York	777706	2022-01-02	Former VOC Omicron GRA (B.1.1.529+BA.*) first detected in Botswana/Hong Kong/South Africa	GRA	BA.1.20	2	Other
Central New York	777706	2022-01-16	Former VOC Omicron GRA (B.1.1.529+BA.*) first detected in Botswana/Hong Kong/South Africa	GRA	BA.1.20	1	Other
Finger Lakes	1205380	2022-01-02	Former VOC Omicron GRA (B.1.1.529+BA.*) first detected in Botswana/Hong Kong/South Africa	GRA	BA.1.20	3	Other
Finger Lakes	1205380	2022-01-09	Former VOC Omicron GRA (B.1.1.529+BA.*) first detected in Botswana/Hong Kong/South Africa	GRA	BA.1.20	5	Other
Finger Lakes	1205380	2022-01-16	Former VOC Omicron GRA (B.1.1.529+BA.*) first detected in Botswana/Hong Kong/South Africa	GRA	BA.1.20	3	Other
Finger Lakes	1205380	2022-01-23	Former VOC Omicron GRA (B.1.1.529+BA.*) first detected in Botswana/Hong Kong/South Africa	GRA	BA.1.20	4	Other
Finger Lakes	1205380	2022-01-30	Former VOC Omicron GRA (B.1.1.529+BA.*) first detected in Botswana/Hong Kong/South Africa	GRA	BA.1.20	1	Other
Finger Lakes	1205380	2022-02-13	Former VOC Omicron GRA (B.1.1.529+BA.*) first detected in Botswana/Hong Kong/South Africa	GRA	BA.1.20	1	Other
Finger Lakes	1205380	2022-02-27	Former VOC Omicron GRA (B.1.1.529+BA.*) first detected in Botswana/Hong Kong/South Africa	GRA	BA.1.20	1	Other
Finger Lakes	1205380	2022-03-06	Former VOC Omicron GRA (B.1.1.529+BA.*) first detected in Botswana/Hong Kong/South Africa	GRA	BA.1.20	1	Other
Long Island	2840341	2022-01-09	Former VOC Omicron GRA (B.1.1.529+BA.*) first detected in Botswana/Hong Kong/South Africa	GRA	BA.1.20	1	Other
Mid-Hudson	2319719	2022-01-02	Former VOC Omicron GRA (B.1.1.529+BA.*) first detected in Botswana/Hong Kong/South Africa	GRA	BA.1.20	8	Other
Mid-Hudson	2319719	2022-01-09	Former VOC Omicron GRA (B.1.1.529+BA.*) first detected in Botswana/Hong Kong/South Africa	GRA	BA.1.20	2	Other
Mid-Hudson	2319719	2022-03-06	Former VOC Omicron GRA (B.1.1.529+BA.*) first detected in Botswana/Hong Kong/South Africa	GRA	BA.1.20	1	Other
Mid-Hudson	2319719	2022-10-16	Former VOC Omicron GRA (B.1.1.529+BA.*) first detected in Botswana/Hong Kong/South Africa	GRA	BA.1.20	1	Other
New York City	8419316	2022-01-02	Former VOC Omicron GRA (B.1.1.529+BA.*) first detected in Botswana/Hong Kong/South Africa	GRA	BA.1.20	72	Other
New York City	8419316	2022-01-09	Former VOC Omicron GRA (B.1.1.529+BA.*) first detected in Botswana/Hong Kong/South Africa	GRA	BA.1.20	67	Other
New York City	8419316	2022-01-16	Former VOC Omicron GRA (B.1.1.529+BA.*) first detected in Botswana/Hong Kong/South Africa	GRA	BA.1.20	55	Other
New York City	8419316	2022-01-23	Former VOC Omicron GRA (B.1.1.529+BA.*) first detected in Botswana/Hong Kong/South Africa	GRA	BA.1.20	37	Other
New York City	8419316	2022-01-30	Former VOC Omicron GRA (B.1.1.529+BA.*) first detected in Botswana/Hong Kong/South Africa	GRA	BA.1.20	31	Other
New York City	8419316	2022-02-06	Former VOC Omicron GRA (B.1.1.529+BA.*) first detected in Botswana/Hong Kong/South Africa	GRA	BA.1.20	33	Other
New York City	8419316	2022-02-13	Former VOC Omicron GRA (B.1.1.529+BA.*) first detected in Botswana/Hong Kong/South Africa	GRA	BA.1.20	9	Other
New York City	8419316	2022-02-20	Former VOC Omicron GRA (B.1.1.529+BA.*) first detected in Botswana/Hong Kong/South Africa	GRA	BA.1.20	6	Other
New York City	8419316	2022-02-27	Former VOC Omicron GRA (B.1.1.529+BA.*) first detected in Botswana/Hong Kong/South Africa	GRA	BA.1.20	2	Other
New York City	8419316	2022-03-06	Former VOC Omicron GRA (B.1.1.529+BA.*) first detected in Botswana/Hong Kong/South Africa	GRA	BA.1.20	3	Other
New York City	8419316	2022-03-13	Former VOC Omicron GRA (B.1.1.529+BA.*) first detected in Botswana/Hong Kong/South Africa	GRA	BA.1.20	2	Other
New York City	8419316	2022-03-20	Former VOC Omicron GRA (B.1.1.529+BA.*) first detected in Botswana/Hong Kong/South Africa	GRA	BA.1.20	3	Other
New York City	8419316	2022-03-27	Former VOC Omicron GRA (B.1.1.529+BA.*) first detected in Botswana/Hong Kong/South Africa	GRA	BA.1.20	2	Other
New York City	8419316	2022-10-16	Former VOC Omicron GRA (B.1.1.529+BA.*) first detected in Botswana/Hong Kong/South Africa	GRA	BA.1.20	1	Other
Western New York	1382480	2022-01-02	Former VOC Omicron GRA (B.1.1.529+BA.*) first detected in Botswana/Hong Kong/South Africa	GRA	BA.1.20	7	Other
Western New York	1382480	2022-01-09	Former VOC Omicron GRA (B.1.1.529+BA.*) first detected in Botswana/Hong Kong/South Africa	GRA	BA.1.20	4	Other
Western New York	1382480	2022-01-16	Former VOC Omicron GRA (B.1.1.529+BA.*) first detected in Botswana/Hong Kong/South Africa	GRA	BA.1.20	3	Other
Western New York	1382480	2022-02-13	Former VOC Omicron GRA (B.1.1.529+BA.*) first detected in Botswana/Hong Kong/South Africa	GRA	BA.1.20	1	Other
Western New York	1382480	2022-02-20	Former VOC Omicron GRA (B.1.1.529+BA.*) first detected in Botswana/Hong Kong/South Africa	GRA	BA.1.20	1	Other
Ontario CA	14570000	2022-01-02	Former VOC Omicron GRA (B.1.1.529+BA.*) first detected in Botswana/Hong Kong/South Africa	GRA	BA.1.20	9	Other
Ontario CA	14570000	2022-01-09	Former VOC Omicron GRA (B.1.1.529+BA.*) first detected in Botswana/Hong Kong/South Africa	GRA	BA.1.20	13	Other
Ontario CA	14570000	2022-01-16	Former VOC Omicron GRA (B.1.1.529+BA.*) first detected in Botswana/Hong Kong/South Africa	GRA	BA.1.20	5	Other
Ontario CA	14570000	2022-01-23	Former VOC Omicron GRA (B.1.1.529+BA.*) first detected in Botswana/Hong Kong/South Africa	GRA	BA.1.20	3	Other
Ontario CA	14570000	2022-01-30	Former VOC Omicron GRA (B.1.1.529+BA.*) first detected in Botswana/Hong Kong/South Africa	GRA	BA.1.20	4	Other
Ontario CA	14570000	2022-02-06	Former VOC Omicron GRA (B.1.1.529+BA.*) first detected in Botswana/Hong Kong/South Africa	GRA	BA.1.20	2	Other
Ontario CA	14570000	2022-02-13	Former VOC Omicron GRA (B.1.1.529+BA.*) first detected in Botswana/Hong Kong/South Africa	GRA	BA.1.20	5	Other
Ontario CA	14570000	2022-02-20	Former VOC Omicron GRA (B.1.1.529+BA.*) first detected in Botswana/Hong Kong/South Africa	GRA	BA.1.20	3	Other
Ontario CA	14570000	2022-02-27	Former VOC Omicron GRA (B.1.1.529+BA.*) first detected in Botswana/Hong Kong/South Africa	GRA	BA.1.20	4	Other
Ontario CA	14570000	2022-03-06	Former VOC Omicron GRA (B.1.1.529+BA.*) first detected in Botswana/Hong Kong/South Africa	GRA	BA.1.20	3	Other
Ontario CA	14570000	2022-03-13	Former VOC Omicron GRA (B.1.1.529+BA.*) first detected in Botswana/Hong Kong/South Africa	GRA	BA.1.20	3	Other
Ontario CA	14570000	2022-04-10	Former VOC Omicron GRA (B.1.1.529+BA.*) first detected in Botswana/Hong Kong/South Africa	GRA	BA.1.20	1	Other
New York City	8419316	2022-01-02	Former VOC Omicron GRA (B.1.1.529+BA.*) first detected in Botswana/Hong Kong/South Africa	GRA	BA.1.21	1	Other
New York City	8419316	2022-01-23	Former VOC Omicron GRA (B.1.1.529+BA.*) first detected in Botswana/Hong Kong/South Africa	GRA	BA.1.21	3	Other
New York City	8419316	2022-02-06	Former VOC Omicron GRA (B.1.1.529+BA.*) first detected in Botswana/Hong Kong/South Africa	GRA	BA.1.21	1	Other
New York City	8419316	2022-02-13	Former VOC Omicron GRA (B.1.1.529+BA.*) first detected in Botswana/Hong Kong/South Africa	GRA	BA.1.21	2	Other
Ontario CA	14570000	2022-01-09	Former VOC Omicron GRA (B.1.1.529+BA.*) first detected in Botswana/Hong Kong/South Africa	GRA	BA.1.21	1	Other
Ontario CA	14570000	2022-02-20	Former VOC Omicron GRA (B.1.1.529+BA.*) first detected in Botswana/Hong Kong/South Africa	GRA	BA.1.21	1	Other
New York City	8419316	2022-01-30	Former VOC Omicron GRA (B.1.1.529+BA.*) first detected in Botswana/Hong Kong/South Africa	GRA	BA.1.21.1	1	Other
Long Island	2840341	2022-04-17	Former VOC Omicron GRA (B.1.1.529+BA.*) first detected in Botswana/Hong Kong/South Africa	GRA	BA.1.23	1	Other
Long Island	2840341	2022-05-01	Former VOC Omicron GRA (B.1.1.529+BA.*) first detected in Botswana/Hong Kong/South Africa	GRA	BA.1.23	1	Other
Mid-Hudson	2319719	2022-03-13	Former VOC Omicron GRA (B.1.1.529+BA.*) first detected in Botswana/Hong Kong/South Africa	GRA	BA.1.23	1	Other
New York City	8419316	2022-02-06	Former VOC Omicron GRA (B.1.1.529+BA.*) first detected in Botswana/Hong Kong/South Africa	GRA	BA.1.23	1	Other
New York City	8419316	2022-02-13	Former VOC Omicron GRA (B.1.1.529+BA.*) first detected in Botswana/Hong Kong/South Africa	GRA	BA.1.23	1	Other
New York City	8419316	2022-02-27	Former VOC Omicron GRA (B.1.1.529+BA.*) first detected in Botswana/Hong Kong/South Africa	GRA	BA.1.23	1	Other
New York City	8419316	2022-03-06	Former VOC Omicron GRA (B.1.1.529+BA.*) first detected in Botswana/Hong Kong/South Africa	GRA	BA.1.23	1	Other
New York City	8419316	2022-03-13	Former VOC Omicron GRA (B.1.1.529+BA.*) first detected in Botswana/Hong Kong/South Africa	GRA	BA.1.23	3	Other
New York City	8419316	2022-04-03	Former VOC Omicron GRA (B.1.1.529+BA.*) first detected in Botswana/Hong Kong/South Africa	GRA	BA.1.23	1	Other
New York City	8419316	2022-04-17	Former VOC Omicron GRA (B.1.1.529+BA.*) first detected in Botswana/Hong Kong/South Africa	GRA	BA.1.23	3	Other
New York City	8419316	2022-05-01	Former VOC Omicron GRA (B.1.1.529+BA.*) first detected in Botswana/Hong Kong/South Africa	GRA	BA.1.23	1	Other
New York City	8419316	2022-08-14	Former VOC Omicron GRA (B.1.1.529+BA.*) first detected in Botswana/Hong Kong/South Africa	GRA	BA.1.23	1	Other
New York City	8419316	2022-01-09	Former VOC Omicron GRA (B.1.1.529+BA.*) first detected in Botswana/Hong Kong/South Africa	GRA	BA.1.3	1	Other
New York City	8419316	2022-01-02	Former VOC Omicron GRA (B.1.1.529+BA.*) first detected in Botswana/Hong Kong/South Africa	GRA	BA.1.4	2	Other
New York City	8419316	2022-02-06	Former VOC Omicron GRA (B.1.1.529+BA.*) first detected in Botswana/Hong Kong/South Africa	GRA	BA.1.4	1	Other
Southern Tier	636657	2022-02-20	Former VOC Omicron GRA (B.1.1.529+BA.*) first detected in Botswana/Hong Kong/South Africa	GRA	BA.1.4	1	Other
Ontario CA	14570000	2022-01-02	Former VOC Omicron GRA (B.1.1.529+BA.*) first detected in Botswana/Hong Kong/South Africa	GRA	BA.1.4	1	Other
Capital Region	1083201	2022-01-09	Former VOC Omicron GRA (B.1.1.529+BA.*) first detected in Botswana/Hong Kong/South Africa	GRA	BA.1.5	1	Other
New York City	8419316	2022-01-09	Former VOC Omicron GRA (B.1.1.529+BA.*) first detected in Botswana/Hong Kong/South Africa	GRA	BA.1.5	2	Other
New York City	8419316	2022-02-06	Former VOC Omicron GRA (B.1.1.529+BA.*) first detected in Botswana/Hong Kong/South Africa	GRA	BA.1.5	1	Other
North Country	421361	2022-01-02	Former VOC Omicron GRA (B.1.1.529+BA.*) first detected in Botswana/Hong Kong/South Africa	GRA	BA.1.5	3	Other
Capital Region	1083201	2022-01-23	Former VOC Omicron GRA (B.1.1.529+BA.*) first detected in Botswana/Hong Kong/South Africa	GRA	BA.1.6	1	Other
Finger Lakes	1205380	2022-01-09	Former VOC Omicron GRA (B.1.1.529+BA.*) first detected in Botswana/Hong Kong/South Africa	GRA	BA.1.6	1	Other
Finger Lakes	1205380	2022-01-16	Former VOC Omicron GRA (B.1.1.529+BA.*) first detected in Botswana/Hong Kong/South Africa	GRA	BA.1.6	1	Other
Finger Lakes	1205380	2022-01-23	Former VOC Omicron GRA (B.1.1.529+BA.*) first detected in Botswana/Hong Kong/South Africa	GRA	BA.1.6	1	Other
Finger Lakes	1205380	2022-02-06	Former VOC Omicron GRA (B.1.1.529+BA.*) first detected in Botswana/Hong Kong/South Africa	GRA	BA.1.6	1	Other
Finger Lakes	1205380	2022-02-13	Former VOC Omicron GRA (B.1.1.529+BA.*) first detected in Botswana/Hong Kong/South Africa	GRA	BA.1.6	2	Other
Finger Lakes	1205380	2022-02-20	Former VOC Omicron GRA (B.1.1.529+BA.*) first detected in Botswana/Hong Kong/South Africa	GRA	BA.1.6	1	Other
New York City	8419316	2022-01-02	Former VOC Omicron GRA (B.1.1.529+BA.*) first detected in Botswana/Hong Kong/South Africa	GRA	BA.1.6	2	Other
New York City	8419316	2022-01-09	Former VOC Omicron GRA (B.1.1.529+BA.*) first detected in Botswana/Hong Kong/South Africa	GRA	BA.1.6	4	Other
New York City	8419316	2022-01-16	Former VOC Omicron GRA (B.1.1.529+BA.*) first detected in Botswana/Hong Kong/South Africa	GRA	BA.1.6	1	Other
New York City	8419316	2022-01-23	Former VOC Omicron GRA (B.1.1.529+BA.*) first detected in Botswana/Hong Kong/South Africa	GRA	BA.1.6	5	Other
New York City	8419316	2022-03-06	Former VOC Omicron GRA (B.1.1.529+BA.*) first detected in Botswana/Hong Kong/South Africa	GRA	BA.1.6	2	Other
Western New York	1382480	2022-01-02	Former VOC Omicron GRA (B.1.1.529+BA.*) first detected in Botswana/Hong Kong/South Africa	GRA	BA.1.6	1	Other
Western New York	1382480	2022-01-23	Former VOC Omicron GRA (B.1.1.529+BA.*) first detected in Botswana/Hong Kong/South Africa	GRA	BA.1.6	1	Other
Ontario CA	14570000	2022-01-02	Former VOC Omicron GRA (B.1.1.529+BA.*) first detected in Botswana/Hong Kong/South Africa	GRA	BA.1.6	8	Other
Ontario CA	14570000	2022-01-09	Former VOC Omicron GRA (B.1.1.529+BA.*) first detected in Botswana/Hong Kong/South Africa	GRA	BA.1.6	8	Other
Ontario CA	14570000	2022-01-16	Former VOC Omicron GRA (B.1.1.529+BA.*) first detected in Botswana/Hong Kong/South Africa	GRA	BA.1.6	4	Other
Ontario CA	14570000	2022-01-23	Former VOC Omicron GRA (B.1.1.529+BA.*) first detected in Botswana/Hong Kong/South Africa	GRA	BA.1.6	3	Other
Ontario CA	14570000	2022-03-06	Former VOC Omicron GRA (B.1.1.529+BA.*) first detected in Botswana/Hong Kong/South Africa	GRA	BA.1.6	1	Other
Ontario CA	14570000	2022-03-13	Former VOC Omicron GRA (B.1.1.529+BA.*) first detected in Botswana/Hong Kong/South Africa	GRA	BA.1.6	2	Other
New York City	8419316	2022-01-09	Former VOC Omicron GRA (B.1.1.529+BA.*) first detected in Botswana/Hong Kong/South Africa	GRA	BA.1.7	1	Other
Ontario CA	14570000	2022-02-20	Former VOC Omicron GRA (B.1.1.529+BA.*) first detected in Botswana/Hong Kong/South Africa	GRA	BA.1.7	1	Other
New York City	8419316	2022-01-23	Former VOC Omicron GRA (B.1.1.529+BA.*) first detected in Botswana/Hong Kong/South Africa	GRA	BA.1.9	2	Other
New York City	8419316	2022-01-30	Former VOC Omicron GRA (B.1.1.529+BA.*) first detected in Botswana/Hong Kong/South Africa	GRA	BA.1.9	1	Other
New York City	8419316	2022-02-20	Former VOC Omicron GRA (B.1.1.529+BA.*) first detected in Botswana/Hong Kong/South Africa	GRA	BA.1.9	1	Other
Capital Region	1083201	2022-04-24	Former VOC Omicron GRA (B.1.1.529+BA.*) first detected in Botswana/Hong Kong/South Africa	GRA	BA.2.1	1	Other
Mid-Hudson	2319719	2022-04-10	Former VOC Omicron GRA (B.1.1.529+BA.*) first detected in Botswana/Hong Kong/South Africa	GRA	BA.2.1	1	Other
Mid-Hudson	2319719	2022-04-24	Former VOC Omicron GRA (B.1.1.529+BA.*) first detected in Botswana/Hong Kong/South Africa	GRA	BA.2.1	1	Other
Mid-Hudson	2319719	2022-05-08	Former VOC Omicron GRA (B.1.1.529+BA.*) first detected in Botswana/Hong Kong/South Africa	GRA	BA.2.1	1	Other
Mid-Hudson	2319719	2022-06-05	Former VOC Omicron GRA (B.1.1.529+BA.*) first detected in Botswana/Hong Kong/South Africa	GRA	BA.2.1	1	Other
New York City	8419316	2022-03-06	Former VOC Omicron GRA (B.1.1.529+BA.*) first detected in Botswana/Hong Kong/South Africa	GRA	BA.2.1	1	Other
New York City	8419316	2022-03-20	Former VOC Omicron GRA (B.1.1.529+BA.*) first detected in Botswana/Hong Kong/South Africa	GRA	BA.2.1	5	Other
New York City	8419316	2022-03-27	Former VOC Omicron GRA (B.1.1.529+BA.*) first detected in Botswana/Hong Kong/South Africa	GRA	BA.2.1	12	Other
New York City	8419316	2022-04-03	Former VOC Omicron GRA (B.1.1.529+BA.*) first detected in Botswana/Hong Kong/South Africa	GRA	BA.2.1	18	Other
New York City	8419316	2022-04-10	Former VOC Omicron GRA (B.1.1.529+BA.*) first detected in Botswana/Hong Kong/South Africa	GRA	BA.2.1	14	Other
New York City	8419316	2022-04-17	Former VOC Omicron GRA (B.1.1.529+BA.*) first detected in Botswana/Hong Kong/South Africa	GRA	BA.2.1	13	Other
New York City	8419316	2022-04-24	Former VOC Omicron GRA (B.1.1.529+BA.*) first detected in Botswana/Hong Kong/South Africa	GRA	BA.2.1	20	Other
New York City	8419316	2022-05-01	Former VOC Omicron GRA (B.1.1.529+BA.*) first detected in Botswana/Hong Kong/South Africa	GRA	BA.2.1	10	Other
New York City	8419316	2022-05-08	Former VOC Omicron GRA (B.1.1.529+BA.*) first detected in Botswana/Hong Kong/South Africa	GRA	BA.2.1	8	Other
New York City	8419316	2022-05-15	Former VOC Omicron GRA (B.1.1.529+BA.*) first detected in Botswana/Hong Kong/South Africa	GRA	BA.2.1	5	Other
New York City	8419316	2022-05-22	Former VOC Omicron GRA (B.1.1.529+BA.*) first detected in Botswana/Hong Kong/South Africa	GRA	BA.2.1	4	Other
New York City	8419316	2022-05-29	Former VOC Omicron GRA (B.1.1.529+BA.*) first detected in Botswana/Hong Kong/South Africa	GRA	BA.2.1	3	Other
New York City	8419316	2022-06-05	Former VOC Omicron GRA (B.1.1.529+BA.*) first detected in Botswana/Hong Kong/South Africa	GRA	BA.2.1	4	Other
New York City	8419316	2022-06-12	Former VOC Omicron GRA (B.1.1.529+BA.*) first detected in Botswana/Hong Kong/South Africa	GRA	BA.2.1	1	Other
New York City	8419316	2022-07-17	Former VOC Omicron GRA (B.1.1.529+BA.*) first detected in Botswana/Hong Kong/South Africa	GRA	BA.2.1	1	Other
New York City	8419316	2022-08-07	Former VOC Omicron GRA (B.1.1.529+BA.*) first detected in Botswana/Hong Kong/South Africa	GRA	BA.2.1	1	Other
Western New York	1382480	2022-04-17	Former VOC Omicron GRA (B.1.1.529+BA.*) first detected in Botswana/Hong Kong/South Africa	GRA	BA.2.1	1	Other
Ontario CA	14570000	2022-02-20	Former VOC Omicron GRA (B.1.1.529+BA.*) first detected in Botswana/Hong Kong/South Africa	GRA	BA.2.1	1	Other
Ontario CA	14570000	2022-03-20	Former VOC Omicron GRA (B.1.1.529+BA.*) first detected in Botswana/Hong Kong/South Africa	GRA	BA.2.1	6	Other
Ontario CA	14570000	2022-03-27	Former VOC Omicron GRA (B.1.1.529+BA.*) first detected in Botswana/Hong Kong/South Africa	GRA	BA.2.1	5	Other
Ontario CA	14570000	2022-04-03	Former VOC Omicron GRA (B.1.1.529+BA.*) first detected in Botswana/Hong Kong/South Africa	GRA	BA.2.1	4	Other
Ontario CA	14570000	2022-04-10	Former VOC Omicron GRA (B.1.1.529+BA.*) first detected in Botswana/Hong Kong/South Africa	GRA	BA.2.1	2	Other
Ontario CA	14570000	2022-04-17	Former VOC Omicron GRA (B.1.1.529+BA.*) first detected in Botswana/Hong Kong/South Africa	GRA	BA.2.1	3	Other
Ontario CA	14570000	2022-04-24	Former VOC Omicron GRA (B.1.1.529+BA.*) first detected in Botswana/Hong Kong/South Africa	GRA	BA.2.1	3	Other
Ontario CA	14570000	2022-05-08	Former VOC Omicron GRA (B.1.1.529+BA.*) first detected in Botswana/Hong Kong/South Africa	GRA	BA.2.1	1	Other
Ontario CA	14570000	2022-05-15	Former VOC Omicron GRA (B.1.1.529+BA.*) first detected in Botswana/Hong Kong/South Africa	GRA	BA.2.1	5	Other
Ontario CA	14570000	2022-05-22	Former VOC Omicron GRA (B.1.1.529+BA.*) first detected in Botswana/Hong Kong/South Africa	GRA	BA.2.1	1	Other
Ontario CA	14570000	2022-05-29	Former VOC Omicron GRA (B.1.1.529+BA.*) first detected in Botswana/Hong Kong/South Africa	GRA	BA.2.1	2	Other
Ontario CA	14570000	2022-06-05	Former VOC Omicron GRA (B.1.1.529+BA.*) first detected in Botswana/Hong Kong/South Africa	GRA	BA.2.1	1	Other
Ontario CA	14570000	2022-06-19	Former VOC Omicron GRA (B.1.1.529+BA.*) first detected in Botswana/Hong Kong/South Africa	GRA	BA.2.1	1	Other
Ontario CA	14570000	2022-06-26	Former VOC Omicron GRA (B.1.1.529+BA.*) first detected in Botswana/Hong Kong/South Africa	GRA	BA.2.1	2	Other
Ontario CA	14570000	2022-07-03	Former VOC Omicron GRA (B.1.1.529+BA.*) first detected in Botswana/Hong Kong/South Africa	GRA	BA.2.1	1	Other
Ontario CA	14570000	2022-07-10	Former VOC Omicron GRA (B.1.1.529+BA.*) first detected in Botswana/Hong Kong/South Africa	GRA	BA.2.1	1	Other
Capital Region	1083201	2022-03-13	Former VOC Omicron GRA (B.1.1.529+BA.*) first detected in Botswana/Hong Kong/South Africa	GRA	BA.2.10	1	Other
Capital Region	1083201	2022-03-20	Former VOC Omicron GRA (B.1.1.529+BA.*) first detected in Botswana/Hong Kong/South Africa	GRA	BA.2.10	1	Other
Capital Region	1083201	2022-04-10	Former VOC Omicron GRA (B.1.1.529+BA.*) first detected in Botswana/Hong Kong/South Africa	GRA	BA.2.10	1	Other
Capital Region	1083201	2022-05-01	Former VOC Omicron GRA (B.1.1.529+BA.*) first detected in Botswana/Hong Kong/South Africa	GRA	BA.2.10	2	Other
Central New York	777706	2022-03-27	Former VOC Omicron GRA (B.1.1.529+BA.*) first detected in Botswana/Hong Kong/South Africa	GRA	BA.2.10	1	Other
Finger Lakes	1205380	2022-03-13	Former VOC Omicron GRA (B.1.1.529+BA.*) first detected in Botswana/Hong Kong/South Africa	GRA	BA.2.10	1	Other
Finger Lakes	1205380	2022-03-27	Former VOC Omicron GRA (B.1.1.529+BA.*) first detected in Botswana/Hong Kong/South Africa	GRA	BA.2.10	4	Other
Long Island	2840341	2022-06-19	Former VOC Omicron GRA (B.1.1.529+BA.*) first detected in Botswana/Hong Kong/South Africa	GRA	BA.2.10	1	Other
Mid-Hudson	2319719	2022-01-23	Former VOC Omicron GRA (B.1.1.529+BA.*) first detected in Botswana/Hong Kong/South Africa	GRA	BA.2.10	1	Other
Mid-Hudson	2319719	2022-02-13	Former VOC Omicron GRA (B.1.1.529+BA.*) first detected in Botswana/Hong Kong/South Africa	GRA	BA.2.10	1	Other
Mid-Hudson	2319719	2022-02-20	Former VOC Omicron GRA (B.1.1.529+BA.*) first detected in Botswana/Hong Kong/South Africa	GRA	BA.2.10	1	Other
Mid-Hudson	2319719	2022-02-27	Former VOC Omicron GRA (B.1.1.529+BA.*) first detected in Botswana/Hong Kong/South Africa	GRA	BA.2.10	1	Other
Mid-Hudson	2319719	2022-03-27	Former VOC Omicron GRA (B.1.1.529+BA.*) first detected in Botswana/Hong Kong/South Africa	GRA	BA.2.10	2	Other
Mid-Hudson	2319719	2022-04-17	Former VOC Omicron GRA (B.1.1.529+BA.*) first detected in Botswana/Hong Kong/South Africa	GRA	BA.2.10	1	Other
Mid-Hudson	2319719	2022-05-08	Former VOC Omicron GRA (B.1.1.529+BA.*) first detected in Botswana/Hong Kong/South Africa	GRA	BA.2.10	2	Other
New York City	8419316	2022-01-09	Former VOC Omicron GRA (B.1.1.529+BA.*) first detected in Botswana/Hong Kong/South Africa	GRA	BA.2.10	1	Other
New York City	8419316	2022-01-16	Former VOC Omicron GRA (B.1.1.529+BA.*) first detected in Botswana/Hong Kong/South Africa	GRA	BA.2.10	4	Other
New York City	8419316	2022-01-23	Former VOC Omicron GRA (B.1.1.529+BA.*) first detected in Botswana/Hong Kong/South Africa	GRA	BA.2.10	11	Other
New York City	8419316	2022-01-30	Former VOC Omicron GRA (B.1.1.529+BA.*) first detected in Botswana/Hong Kong/South Africa	GRA	BA.2.10	11	Other
New York City	8419316	2022-02-06	Former VOC Omicron GRA (B.1.1.529+BA.*) first detected in Botswana/Hong Kong/South Africa	GRA	BA.2.10	10	Other
New York City	8419316	2022-02-13	Former VOC Omicron GRA (B.1.1.529+BA.*) first detected in Botswana/Hong Kong/South Africa	GRA	BA.2.10	19	Other
New York City	8419316	2022-02-20	Former VOC Omicron GRA (B.1.1.529+BA.*) first detected in Botswana/Hong Kong/South Africa	GRA	BA.2.10	22	Other
New York City	8419316	2022-02-27	Former VOC Omicron GRA (B.1.1.529+BA.*) first detected in Botswana/Hong Kong/South Africa	GR	BA.2.10	1	Other
New York City	8419316	2022-02-27	Former VOC Omicron GRA (B.1.1.529+BA.*) first detected in Botswana/Hong Kong/South Africa	GRA	BA.2.10	24	Other
New York City	8419316	2022-03-06	Former VOC Omicron GRA (B.1.1.529+BA.*) first detected in Botswana/Hong Kong/South Africa	GRA	BA.2.10	43	Other
New York City	8419316	2022-03-13	Former VOC Omicron GRA (B.1.1.529+BA.*) first detected in Botswana/Hong Kong/South Africa	GRA	BA.2.10	45	Other
New York City	8419316	2022-03-20	Former VOC Omicron GRA (B.1.1.529+BA.*) first detected in Botswana/Hong Kong/South Africa	GR	BA.2.10	1	Other
New York City	8419316	2022-03-20	Former VOC Omicron GRA (B.1.1.529+BA.*) first detected in Botswana/Hong Kong/South Africa	GRA	BA.2.10	71	Other
New York City	8419316	2022-03-27	Former VOC Omicron GRA (B.1.1.529+BA.*) first detected in Botswana/Hong Kong/South Africa	GRA	BA.2.10	70	Other
New York City	8419316	2022-04-03	Former VOC Omicron GRA (B.1.1.529+BA.*) first detected in Botswana/Hong Kong/South Africa	GRA	BA.2.10	73	Other
New York City	8419316	2022-04-10	Former VOC Omicron GRA (B.1.1.529+BA.*) first detected in Botswana/Hong Kong/South Africa	GRA	BA.2.10	41	Other
New York City	8419316	2022-04-17	Former VOC Omicron GRA (B.1.1.529+BA.*) first detected in Botswana/Hong Kong/South Africa	GRA	BA.2.10	37	Other
New York City	8419316	2022-04-24	Former VOC Omicron GRA (B.1.1.529+BA.*) first detected in Botswana/Hong Kong/South Africa	GRA	BA.2.10	19	Other
New York City	8419316	2022-05-01	Former VOC Omicron GRA (B.1.1.529+BA.*) first detected in Botswana/Hong Kong/South Africa	GRA	BA.2.10	18	Other
New York City	8419316	2022-05-08	Former VOC Omicron GRA (B.1.1.529+BA.*) first detected in Botswana/Hong Kong/South Africa	GRA	BA.2.10	16	Other
New York City	8419316	2022-05-15	Former VOC Omicron GRA (B.1.1.529+BA.*) first detected in Botswana/Hong Kong/South Africa	GRA	BA.2.10	21	Other
New York City	8419316	2022-05-22	Former VOC Omicron GRA (B.1.1.529+BA.*) first detected in Botswana/Hong Kong/South Africa	GRA	BA.2.10	9	Other
New York City	8419316	2022-05-29	Former VOC Omicron GRA (B.1.1.529+BA.*) first detected in Botswana/Hong Kong/South Africa	GRA	BA.2.10	8	Other
New York City	8419316	2022-06-05	Former VOC Omicron GRA (B.1.1.529+BA.*) first detected in Botswana/Hong Kong/South Africa	GRA	BA.2.10	1	Other
New York City	8419316	2022-06-12	Former VOC Omicron GRA (B.1.1.529+BA.*) first detected in Botswana/Hong Kong/South Africa	GRA	BA.2.10	1	Other
New York City	8419316	2022-07-17	Former VOC Omicron GRA (B.1.1.529+BA.*) first detected in Botswana/Hong Kong/South Africa	GRA	BA.2.10	1	Other
New York City	8419316	2022-10-09	Former VOC Omicron GRA (B.1.1.529+BA.*) first detected in Botswana/Hong Kong/South Africa	GRA	BA.2.10	1	Other
New York City	8419316	2022-11-13	Former VOC Omicron GRA (B.1.1.529+BA.*) first detected in Botswana/Hong Kong/South Africa	GRA	BA.2.10	1	Other
North Country	421361	2022-03-13	Former VOC Omicron GRA (B.1.1.529+BA.*) first detected in Botswana/Hong Kong/South Africa	GRA	BA.2.10	2	Other
North Country	421361	2022-06-26	Former VOC Omicron GRA (B.1.1.529+BA.*) first detected in Botswana/Hong Kong/South Africa	GRA	BA.2.10	1	Other
Western New York	1382480	2022-02-27	Former VOC Omicron GRA (B.1.1.529+BA.*) first detected in Botswana/Hong Kong/South Africa	GRA	BA.2.10	1	Other
Western New York	1382480	2022-03-13	Former VOC Omicron GRA (B.1.1.529+BA.*) first detected in Botswana/Hong Kong/South Africa	GRA	BA.2.10	1	Other
Western New York	1382480	2022-03-27	Former VOC Omicron GRA (B.1.1.529+BA.*) first detected in Botswana/Hong Kong/South Africa	GRA	BA.2.10	1	Other
Western New York	1382480	2022-04-03	Former VOC Omicron GRA (B.1.1.529+BA.*) first detected in Botswana/Hong Kong/South Africa	GRA	BA.2.10	1	Other
Western New York	1382480	2022-04-10	Former VOC Omicron GRA (B.1.1.529+BA.*) first detected in Botswana/Hong Kong/South Africa	GRA	BA.2.10	1	Other
Western New York	1382480	2022-05-29	Former VOC Omicron GRA (B.1.1.529+BA.*) first detected in Botswana/Hong Kong/South Africa	GRA	BA.2.10	1	Other
Ontario CA	14570000	2022-01-02	Former VOC Omicron GRA (B.1.1.529+BA.*) first detected in Botswana/Hong Kong/South Africa	GRA	BA.2.10	1	Other
Ontario CA	14570000	2022-01-09	Former VOC Omicron GRA (B.1.1.529+BA.*) first detected in Botswana/Hong Kong/South Africa	GRA	BA.2.10	14	Other
Ontario CA	14570000	2022-01-16	Former VOC Omicron GRA (B.1.1.529+BA.*) first detected in Botswana/Hong Kong/South Africa	GRA	BA.2.10	13	Other
Ontario CA	14570000	2022-01-23	Former VOC Omicron GRA (B.1.1.529+BA.*) first detected in Botswana/Hong Kong/South Africa	GRA	BA.2.10	19	Other
Ontario CA	14570000	2022-01-30	Former VOC Omicron GRA (B.1.1.529+BA.*) first detected in Botswana/Hong Kong/South Africa	GRA	BA.2.10	9	Other
Ontario CA	14570000	2022-02-06	Former VOC Omicron GRA (B.1.1.529+BA.*) first detected in Botswana/Hong Kong/South Africa	GRA	BA.2.10	10	Other
Ontario CA	14570000	2022-02-13	Former VOC Omicron GRA (B.1.1.529+BA.*) first detected in Botswana/Hong Kong/South Africa	GRA	BA.2.10	17	Other
Ontario CA	14570000	2022-02-20	Former VOC Omicron GRA (B.1.1.529+BA.*) first detected in Botswana/Hong Kong/South Africa	GRA	BA.2.10	24	Other
Ontario CA	14570000	2022-02-27	Former VOC Omicron GRA (B.1.1.529+BA.*) first detected in Botswana/Hong Kong/South Africa	GRA	BA.2.10	14	Other
Ontario CA	14570000	2022-03-06	Former VOC Omicron GRA (B.1.1.529+BA.*) first detected in Botswana/Hong Kong/South Africa	GRA	BA.2.10	18	Other
Ontario CA	14570000	2022-03-13	Former VOC Omicron GRA (B.1.1.529+BA.*) first detected in Botswana/Hong Kong/South Africa	GRA	BA.2.10	26	Other
Ontario CA	14570000	2022-03-20	Former VOC Omicron GRA (B.1.1.529+BA.*) first detected in Botswana/Hong Kong/South Africa	GRA	BA.2.10	23	Other
Ontario CA	14570000	2022-03-27	Former VOC Omicron GRA (B.1.1.529+BA.*) first detected in Botswana/Hong Kong/South Africa	GRA	BA.2.10	16	Other
Ontario CA	14570000	2022-04-03	Former VOC Omicron GRA (B.1.1.529+BA.*) first detected in Botswana/Hong Kong/South Africa	GRA	BA.2.10	9	Other
Ontario CA	14570000	2022-04-10	Former VOC Omicron GRA (B.1.1.529+BA.*) first detected in Botswana/Hong Kong/South Africa	GRA	BA.2.10	12	Other
Ontario CA	14570000	2022-04-17	Former VOC Omicron GRA (B.1.1.529+BA.*) first detected in Botswana/Hong Kong/South Africa	GRA	BA.2.10	7	Other
Ontario CA	14570000	2022-04-24	Former VOC Omicron GRA (B.1.1.529+BA.*) first detected in Botswana/Hong Kong/South Africa	GRA	BA.2.10	4	Other
Ontario CA	14570000	2022-05-01	Former VOC Omicron GRA (B.1.1.529+BA.*) first detected in Botswana/Hong Kong/South Africa	GRA	BA.2.10	4	Other
Ontario CA	14570000	2022-05-15	Former VOC Omicron GRA (B.1.1.529+BA.*) first detected in Botswana/Hong Kong/South Africa	GRA	BA.2.10	1	Other
Ontario CA	14570000	2022-05-29	Former VOC Omicron GRA (B.1.1.529+BA.*) first detected in Botswana/Hong Kong/South Africa	GRA	BA.2.10	1	Other
Ontario CA	14570000	2022-06-05	Former VOC Omicron GRA (B.1.1.529+BA.*) first detected in Botswana/Hong Kong/South Africa	GRA	BA.2.10	1	Other
New York City	8419316	2022-01-16	Former VOC Omicron GRA (B.1.1.529+BA.*) first detected in Botswana/Hong Kong/South Africa	GRA	BA.2.10.1	2	Other
New York City	8419316	2022-02-06	Former VOC Omicron GRA (B.1.1.529+BA.*) first detected in Botswana/Hong Kong/South Africa	GRA	BA.2.10.1	1	Other
New York City	8419316	2022-02-13	Former VOC Omicron GRA (B.1.1.529+BA.*) first detected in Botswana/Hong Kong/South Africa	GRA	BA.2.10.1	1	Other
New York City	8419316	2022-02-20	Former VOC Omicron GRA (B.1.1.529+BA.*) first detected in Botswana/Hong Kong/South Africa	GRA	BA.2.10.1	5	Other
New York City	8419316	2022-02-27	Former VOC Omicron GRA (B.1.1.529+BA.*) first detected in Botswana/Hong Kong/South Africa	GRA	BA.2.10.1	3	Other
New York City	8419316	2022-03-06	Former VOC Omicron GRA (B.1.1.529+BA.*) first detected in Botswana/Hong Kong/South Africa	GRA	BA.2.10.1	1	Other
New York City	8419316	2022-03-13	Former VOC Omicron GRA (B.1.1.529+BA.*) first detected in Botswana/Hong Kong/South Africa	GRA	BA.2.10.1	4	Other
New York City	8419316	2022-03-20	Former VOC Omicron GRA (B.1.1.529+BA.*) first detected in Botswana/Hong Kong/South Africa	GRA	BA.2.10.1	6	Other
New York City	8419316	2022-03-27	Former VOC Omicron GRA (B.1.1.529+BA.*) first detected in Botswana/Hong Kong/South Africa	GRA	BA.2.10.1	12	Other
New York City	8419316	2022-04-03	Former VOC Omicron GRA (B.1.1.529+BA.*) first detected in Botswana/Hong Kong/South Africa	GRA	BA.2.10.1	6	Other
New York City	8419316	2022-04-10	Former VOC Omicron GRA (B.1.1.529+BA.*) first detected in Botswana/Hong Kong/South Africa	GRA	BA.2.10.1	1	Other
New York City	8419316	2022-04-17	Former VOC Omicron GRA (B.1.1.529+BA.*) first detected in Botswana/Hong Kong/South Africa	GRA	BA.2.10.1	1	Other
New York City	8419316	2022-04-24	Former VOC Omicron GRA (B.1.1.529+BA.*) first detected in Botswana/Hong Kong/South Africa	GRA	BA.2.10.1	2	Other
New York City	8419316	2022-05-01	Former VOC Omicron GRA (B.1.1.529+BA.*) first detected in Botswana/Hong Kong/South Africa	GRA	BA.2.10.1	2	Other
New York City	8419316	2022-05-08	Former VOC Omicron GRA (B.1.1.529+BA.*) first detected in Botswana/Hong Kong/South Africa	GRA	BA.2.10.1	2	Other
New York City	8419316	2022-05-15	Former VOC Omicron GRA (B.1.1.529+BA.*) first detected in Botswana/Hong Kong/South Africa	GRA	BA.2.10.1	4	Other
New York City	8419316	2022-07-17	Former VOC Omicron GRA (B.1.1.529+BA.*) first detected in Botswana/Hong Kong/South Africa	GRA	BA.2.10.1	1	Other
New York City	8419316	2022-10-23	Former VOC Omicron GRA (B.1.1.529+BA.*) first detected in Botswana/Hong Kong/South Africa	GRA	BA.2.10.1	3	Other
New York City	8419316	2022-11-20	Former VOC Omicron GRA (B.1.1.529+BA.*) first detected in Botswana/Hong Kong/South Africa	GRA	BA.2.10.1	1	Other
New York City	8419316	2022-11-27	Former VOC Omicron GRA (B.1.1.529+BA.*) first detected in Botswana/Hong Kong/South Africa	GRA	BA.2.10.1	1	Other
New York City	8419316	2022-12-18	Former VOC Omicron GRA (B.1.1.529+BA.*) first detected in Botswana/Hong Kong/South Africa	GRA	BA.2.10.1	1	Other
Ontario CA	14570000	2022-01-30	Former VOC Omicron GRA (B.1.1.529+BA.*) first detected in Botswana/Hong Kong/South Africa	GRA	BA.2.10.1	7	Other
Ontario CA	14570000	2022-02-20	Former VOC Omicron GRA (B.1.1.529+BA.*) first detected in Botswana/Hong Kong/South Africa	GRA	BA.2.10.1	2	Other
Ontario CA	14570000	2022-02-27	Former VOC Omicron GRA (B.1.1.529+BA.*) first detected in Botswana/Hong Kong/South Africa	GRA	BA.2.10.1	1	Other
Ontario CA	14570000	2022-03-06	Former VOC Omicron GRA (B.1.1.529+BA.*) first detected in Botswana/Hong Kong/South Africa	GRA	BA.2.10.1	1	Other
Ontario CA	14570000	2022-03-27	Former VOC Omicron GRA (B.1.1.529+BA.*) first detected in Botswana/Hong Kong/South Africa	GRA	BA.2.10.1	1	Other
Ontario CA	14570000	2022-04-10	Former VOC Omicron GRA (B.1.1.529+BA.*) first detected in Botswana/Hong Kong/South Africa	GRA	BA.2.10.1	1	Other
Ontario CA	14570000	2022-04-24	Former VOC Omicron GRA (B.1.1.529+BA.*) first detected in Botswana/Hong Kong/South Africa	GRA	BA.2.10.1	3	Other
New York City	8419316	2022-02-20	Former VOC Omicron GRA (B.1.1.529+BA.*) first detected in Botswana/Hong Kong/South Africa	GRA	BA.2.10.3	1	Other
New York City	8419316	2022-02-27	Former VOC Omicron GRA (B.1.1.529+BA.*) first detected in Botswana/Hong Kong/South Africa	GRA	BA.2.10.3	1	Other
New York City	8419316	2022-03-20	Former VOC Omicron GRA (B.1.1.529+BA.*) first detected in Botswana/Hong Kong/South Africa	GRA	BA.2.10.3	1	Other
New York City	8419316	2022-04-03	Former VOC Omicron GRA (B.1.1.529+BA.*) first detected in Botswana/Hong Kong/South Africa	GRA	BA.2.10.3	1	Other
New York City	8419316	2022-05-08	Former VOC Omicron GRA (B.1.1.529+BA.*) first detected in Botswana/Hong Kong/South Africa	GRA	BA.2.10.3	1	Other
Ontario CA	14570000	2022-02-13	Former VOC Omicron GRA (B.1.1.529+BA.*) first detected in Botswana/Hong Kong/South Africa	GRA	BA.2.10.3	1	Other
Ontario CA	14570000	2022-04-10	Former VOC Omicron GRA (B.1.1.529+BA.*) first detected in Botswana/Hong Kong/South Africa	GRA	BA.2.11	1	Other
Ontario CA	14570000	2022-06-19	Former VOC Omicron GRA (B.1.1.529+BA.*) first detected in Botswana/Hong Kong/South Africa	GRA	BA.2.11	2	Other
Ontario CA	14570000	2022-06-26	Former VOC Omicron GRA (B.1.1.529+BA.*) first detected in Botswana/Hong Kong/South Africa	GRA	BA.2.11	1	Other
Ontario CA	14570000	2022-07-03	Former VOC Omicron GRA (B.1.1.529+BA.*) first detected in Botswana/Hong Kong/South Africa	GRA	BA.2.11	1	Other
Mid-Hudson	2319719	2022-04-10	Former VOC Omicron GRA (B.1.1.529+BA.*) first detected in Botswana/Hong Kong/South Africa	GRA	BA.2.12	1	Other
Mid-Hudson	2319719	2022-05-01	Former VOC Omicron GRA (B.1.1.529+BA.*) first detected in Botswana/Hong Kong/South Africa	GRA	BA.2.12	1	Other
New York City	8419316	2022-02-20	Former VOC Omicron GRA (B.1.1.529+BA.*) first detected in Botswana/Hong Kong/South Africa	GRA	BA.2.12	2	Other
New York City	8419316	2022-02-27	Former VOC Omicron GRA (B.1.1.529+BA.*) first detected in Botswana/Hong Kong/South Africa	GRA	BA.2.12	1	Other
New York City	8419316	2022-03-06	Former VOC Omicron GRA (B.1.1.529+BA.*) first detected in Botswana/Hong Kong/South Africa	GRA	BA.2.12	1	Other
New York City	8419316	2022-03-13	Former VOC Omicron GRA (B.1.1.529+BA.*) first detected in Botswana/Hong Kong/South Africa	GRA	BA.2.12	2	Other
New York City	8419316	2022-03-20	Former VOC Omicron GRA (B.1.1.529+BA.*) first detected in Botswana/Hong Kong/South Africa	GRA	BA.2.12	7	Other
New York City	8419316	2022-03-27	Former VOC Omicron GRA (B.1.1.529+BA.*) first detected in Botswana/Hong Kong/South Africa	GRA	BA.2.12	13	Other
New York City	8419316	2022-04-03	Former VOC Omicron GRA (B.1.1.529+BA.*) first detected in Botswana/Hong Kong/South Africa	GRA	BA.2.12	17	Other
New York City	8419316	2022-04-10	Former VOC Omicron GRA (B.1.1.529+BA.*) first detected in Botswana/Hong Kong/South Africa	GRA	BA.2.12	24	Other
New York City	8419316	2022-04-17	Former VOC Omicron GRA (B.1.1.529+BA.*) first detected in Botswana/Hong Kong/South Africa	GRA	BA.2.12	15	Other
New York City	8419316	2022-04-24	Former VOC Omicron GRA (B.1.1.529+BA.*) first detected in Botswana/Hong Kong/South Africa	GRA	BA.2.12	14	Other
New York City	8419316	2022-05-01	Former VOC Omicron GRA (B.1.1.529+BA.*) first detected in Botswana/Hong Kong/South Africa	GRA	BA.2.12	18	Other
New York City	8419316	2022-05-08	Former VOC Omicron GRA (B.1.1.529+BA.*) first detected in Botswana/Hong Kong/South Africa	GRA	BA.2.12	23	Other
New York City	8419316	2022-05-15	Former VOC Omicron GRA (B.1.1.529+BA.*) first detected in Botswana/Hong Kong/South Africa	GRA	BA.2.12	12	Other
New York City	8419316	2022-05-22	Former VOC Omicron GRA (B.1.1.529+BA.*) first detected in Botswana/Hong Kong/South Africa	GRA	BA.2.12	8	Other
New York City	8419316	2022-05-29	Former VOC Omicron GRA (B.1.1.529+BA.*) first detected in Botswana/Hong Kong/South Africa	GRA	BA.2.12	6	Other
New York City	8419316	2022-06-05	Former VOC Omicron GRA (B.1.1.529+BA.*) first detected in Botswana/Hong Kong/South Africa	GRA	BA.2.12	5	Other
New York City	8419316	2022-06-12	Former VOC Omicron GRA (B.1.1.529+BA.*) first detected in Botswana/Hong Kong/South Africa	GRA	BA.2.12	5	Other
New York City	8419316	2022-06-19	Former VOC Omicron GRA (B.1.1.529+BA.*) first detected in Botswana/Hong Kong/South Africa	GRA	BA.2.12	1	Other
New York City	8419316	2022-07-10	Former VOC Omicron GRA (B.1.1.529+BA.*) first detected in Botswana/Hong Kong/South Africa	GRA	BA.2.12	1	Other
New York City	8419316	2022-09-18	Former VOC Omicron GRA (B.1.1.529+BA.*) first detected in Botswana/Hong Kong/South Africa	GRA	BA.2.12	1	Other
Western New York	1382480	2022-05-01	Former VOC Omicron GRA (B.1.1.529+BA.*) first detected in Botswana/Hong Kong/South Africa	GRA	BA.2.12	1	Other
Western New York	1382480	2022-05-15	Former VOC Omicron GRA (B.1.1.529+BA.*) first detected in Botswana/Hong Kong/South Africa	GRA	BA.2.12	1	Other
Ontario CA	14570000	2022-01-16	Former VOC Omicron GRA (B.1.1.529+BA.*) first detected in Botswana/Hong Kong/South Africa	GRA	BA.2.12	1	Other
Ontario CA	14570000	2022-02-06	Former VOC Omicron GRA (B.1.1.529+BA.*) first detected in Botswana/Hong Kong/South Africa	GRA	BA.2.12	1	Other
Ontario CA	14570000	2022-02-20	Former VOC Omicron GRA (B.1.1.529+BA.*) first detected in Botswana/Hong Kong/South Africa	GRA	BA.2.12	1	Other
Ontario CA	14570000	2022-02-27	Former VOC Omicron GRA (B.1.1.529+BA.*) first detected in Botswana/Hong Kong/South Africa	GRA	BA.2.12	1	Other
Ontario CA	14570000	2022-03-13	Former VOC Omicron GRA (B.1.1.529+BA.*) first detected in Botswana/Hong Kong/South Africa	GRA	BA.2.12	5	Other
Ontario CA	14570000	2022-03-20	Former VOC Omicron GRA (B.1.1.529+BA.*) first detected in Botswana/Hong Kong/South Africa	GRA	BA.2.12	4	Other
Ontario CA	14570000	2022-03-27	Former VOC Omicron GRA (B.1.1.529+BA.*) first detected in Botswana/Hong Kong/South Africa	GRA	BA.2.12	2	Other
Ontario CA	14570000	2022-04-03	Former VOC Omicron GRA (B.1.1.529+BA.*) first detected in Botswana/Hong Kong/South Africa	GRA	BA.2.12	2	Other
Ontario CA	14570000	2022-04-10	Former VOC Omicron GRA (B.1.1.529+BA.*) first detected in Botswana/Hong Kong/South Africa	GRA	BA.2.12	3	Other
Ontario CA	14570000	2022-04-17	Former VOC Omicron GRA (B.1.1.529+BA.*) first detected in Botswana/Hong Kong/South Africa	GRA	BA.2.12	2	Other
Ontario CA	14570000	2022-04-24	Former VOC Omicron GRA (B.1.1.529+BA.*) first detected in Botswana/Hong Kong/South Africa	GRA	BA.2.12	1	Other
Ontario CA	14570000	2022-05-22	Former VOC Omicron GRA (B.1.1.529+BA.*) first detected in Botswana/Hong Kong/South Africa	GRA	BA.2.12	1	Other
Ontario CA	14570000	2022-06-19	Former VOC Omicron GRA (B.1.1.529+BA.*) first detected in Botswana/Hong Kong/South Africa	GR	BA.2.12	1	Other
Ontario CA	14570000	2022-06-19	Former VOC Omicron GRA (B.1.1.529+BA.*) first detected in Botswana/Hong Kong/South Africa	GRA	BA.2.12	1	Other
New York City	8419316	2022-07-03	Former VOC Omicron GRA (B.1.1.529+BA.*) first detected in Botswana/Hong Kong/South Africa	GRA	BA.2.12.2	1	Other
Ontario CA	14570000	2022-05-22	Former VOC Omicron GRA (B.1.1.529+BA.*) first detected in Botswana/Hong Kong/South Africa	GRA	BA.2.12.2	1	Other
Central New York	777706	2022-06-12	Former VOC Omicron GRA (B.1.1.529+BA.*) first detected in Botswana/Hong Kong/South Africa	GRA	BA.2.13	1	Other
Finger Lakes	1205380	2022-05-01	Former VOC Omicron GRA (B.1.1.529+BA.*) first detected in Botswana/Hong Kong/South Africa	GRA	BA.2.13	2	Other
Finger Lakes	1205380	2022-05-08	Former VOC Omicron GRA (B.1.1.529+BA.*) first detected in Botswana/Hong Kong/South Africa	GRA	BA.2.13	1	Other
Finger Lakes	1205380	2022-05-15	Former VOC Omicron GRA (B.1.1.529+BA.*) first detected in Botswana/Hong Kong/South Africa	GRA	BA.2.13	1	Other
Finger Lakes	1205380	2022-06-05	Former VOC Omicron GRA (B.1.1.529+BA.*) first detected in Botswana/Hong Kong/South Africa	GRA	BA.2.13	1	Other
Mid-Hudson	2319719	2022-05-29	Former VOC Omicron GRA (B.1.1.529+BA.*) first detected in Botswana/Hong Kong/South Africa	GRA	BA.2.13	1	Other
Mid-Hudson	2319719	2022-06-12	Former VOC Omicron GRA (B.1.1.529+BA.*) first detected in Botswana/Hong Kong/South Africa	GRA	BA.2.13	2	Other
New York City	8419316	2022-03-27	Former VOC Omicron GRA (B.1.1.529+BA.*) first detected in Botswana/Hong Kong/South Africa	GRA	BA.2.13	3	Other
New York City	8419316	2022-04-03	Former VOC Omicron GRA (B.1.1.529+BA.*) first detected in Botswana/Hong Kong/South Africa	GRA	BA.2.13	5	Other
New York City	8419316	2022-04-10	Former VOC Omicron GRA (B.1.1.529+BA.*) first detected in Botswana/Hong Kong/South Africa	GRA	BA.2.13	7	Other
New York City	8419316	2022-04-17	Former VOC Omicron GRA (B.1.1.529+BA.*) first detected in Botswana/Hong Kong/South Africa	GRA	BA.2.13	3	Other
New York City	8419316	2022-04-24	Former VOC Omicron GRA (B.1.1.529+BA.*) first detected in Botswana/Hong Kong/South Africa	GRA	BA.2.13	6	Other
New York City	8419316	2022-05-01	Former VOC Omicron GRA (B.1.1.529+BA.*) first detected in Botswana/Hong Kong/South Africa	GRA	BA.2.13	3	Other
New York City	8419316	2022-05-08	Former VOC Omicron GRA (B.1.1.529+BA.*) first detected in Botswana/Hong Kong/South Africa	GRA	BA.2.13	11	Other
New York City	8419316	2022-05-15	Former VOC Omicron GRA (B.1.1.529+BA.*) first detected in Botswana/Hong Kong/South Africa	GRA	BA.2.13	11	Other
New York City	8419316	2022-05-22	Former VOC Omicron GRA (B.1.1.529+BA.*) first detected in Botswana/Hong Kong/South Africa	GRA	BA.2.13	15	Other
New York City	8419316	2022-05-29	Former VOC Omicron GRA (B.1.1.529+BA.*) first detected in Botswana/Hong Kong/South Africa	GRA	BA.2.13	23	Other
New York City	8419316	2022-06-05	Former VOC Omicron GRA (B.1.1.529+BA.*) first detected in Botswana/Hong Kong/South Africa	GRA	BA.2.13	20	Other
New York City	8419316	2022-06-12	Former VOC Omicron GRA (B.1.1.529+BA.*) first detected in Botswana/Hong Kong/South Africa	GRA	BA.2.13	8	Other
New York City	8419316	2022-06-19	Former VOC Omicron GRA (B.1.1.529+BA.*) first detected in Botswana/Hong Kong/South Africa	GRA	BA.2.13	8	Other
New York City	8419316	2022-06-26	Former VOC Omicron GRA (B.1.1.529+BA.*) first detected in Botswana/Hong Kong/South Africa	GRA	BA.2.13	7	Other
New York City	8419316	2022-07-03	Former VOC Omicron GRA (B.1.1.529+BA.*) first detected in Botswana/Hong Kong/South Africa	GRA	BA.2.13	3	Other
New York City	8419316	2022-07-17	Former VOC Omicron GRA (B.1.1.529+BA.*) first detected in Botswana/Hong Kong/South Africa	GRA	BA.2.13	1	Other
New York City	8419316	2022-07-24	Former VOC Omicron GRA (B.1.1.529+BA.*) first detected in Botswana/Hong Kong/South Africa	GRA	BA.2.13	1	Other
Western New York	1382480	2022-05-22	Former VOC Omicron GRA (B.1.1.529+BA.*) first detected in Botswana/Hong Kong/South Africa	GRA	BA.2.13	1	Other
Ontario CA	14570000	2022-05-15	Former VOC Omicron GRA (B.1.1.529+BA.*) first detected in Botswana/Hong Kong/South Africa	GRA	BA.2.13	1	Other
Ontario CA	14570000	2022-05-22	Former VOC Omicron GRA (B.1.1.529+BA.*) first detected in Botswana/Hong Kong/South Africa	GRA	BA.2.13	1	Other
Ontario CA	14570000	2022-05-29	Former VOC Omicron GRA (B.1.1.529+BA.*) first detected in Botswana/Hong Kong/South Africa	GRA	BA.2.13	1	Other
Ontario CA	14570000	2022-06-05	Former VOC Omicron GRA (B.1.1.529+BA.*) first detected in Botswana/Hong Kong/South Africa	GRA	BA.2.13	2	Other
Ontario CA	14570000	2022-06-12	Former VOC Omicron GRA (B.1.1.529+BA.*) first detected in Botswana/Hong Kong/South Africa	GRA	BA.2.13	4	Other
Ontario CA	14570000	2022-06-19	Former VOC Omicron GRA (B.1.1.529+BA.*) first detected in Botswana/Hong Kong/South Africa	GRA	BA.2.13	3	Other
Ontario CA	14570000	2022-06-26	Former VOC Omicron GRA (B.1.1.529+BA.*) first detected in Botswana/Hong Kong/South Africa	GRA	BA.2.13	4	Other
Ontario CA	14570000	2022-07-03	Former VOC Omicron GRA (B.1.1.529+BA.*) first detected in Botswana/Hong Kong/South Africa	GRA	BA.2.13	1	Other
Finger Lakes	1205380	2022-07-03	Former VOC Omicron GRA (B.1.1.529+BA.*) first detected in Botswana/Hong Kong/South Africa	GRA	BA.2.13.1	1	Other
New York City	8419316	2022-05-01	Former VOC Omicron GRA (B.1.1.529+BA.*) first detected in Botswana/Hong Kong/South Africa	GRA	BA.2.13.1	1	Other
New York City	8419316	2022-05-08	Former VOC Omicron GRA (B.1.1.529+BA.*) first detected in Botswana/Hong Kong/South Africa	GRA	BA.2.13.1	2	Other
New York City	8419316	2022-05-15	Former VOC Omicron GRA (B.1.1.529+BA.*) first detected in Botswana/Hong Kong/South Africa	GRA	BA.2.13.1	7	Other
New York City	8419316	2022-05-22	Former VOC Omicron GRA (B.1.1.529+BA.*) first detected in Botswana/Hong Kong/South Africa	GRA	BA.2.13.1	5	Other
New York City	8419316	2022-05-29	Former VOC Omicron GRA (B.1.1.529+BA.*) first detected in Botswana/Hong Kong/South Africa	GRA	BA.2.13.1	8	Other
New York City	8419316	2022-06-05	Former VOC Omicron GRA (B.1.1.529+BA.*) first detected in Botswana/Hong Kong/South Africa	GRA	BA.2.13.1	5	Other
New York City	8419316	2022-06-12	Former VOC Omicron GRA (B.1.1.529+BA.*) first detected in Botswana/Hong Kong/South Africa	GRA	BA.2.13.1	5	Other
New York City	8419316	2022-06-19	Former VOC Omicron GRA (B.1.1.529+BA.*) first detected in Botswana/Hong Kong/South Africa	GRA	BA.2.13.1	2	Other
New York City	8419316	2022-06-26	Former VOC Omicron GRA (B.1.1.529+BA.*) first detected in Botswana/Hong Kong/South Africa	GRA	BA.2.13.1	11	Other
New York City	8419316	2022-07-03	Former VOC Omicron GRA (B.1.1.529+BA.*) first detected in Botswana/Hong Kong/South Africa	GRA	BA.2.13.1	3	Other
New York City	8419316	2022-07-10	Former VOC Omicron GRA (B.1.1.529+BA.*) first detected in Botswana/Hong Kong/South Africa	GRA	BA.2.13.1	3	Other
New York City	8419316	2022-07-17	Former VOC Omicron GRA (B.1.1.529+BA.*) first detected in Botswana/Hong Kong/South Africa	GRA	BA.2.13.1	2	Other
Ontario CA	14570000	2022-05-08	Former VOC Omicron GRA (B.1.1.529+BA.*) first detected in Botswana/Hong Kong/South Africa	GRA	BA.2.13.1	1	Other
Ontario CA	14570000	2022-05-15	Former VOC Omicron GRA (B.1.1.529+BA.*) first detected in Botswana/Hong Kong/South Africa	GRA	BA.2.13.1	2	Other
Ontario CA	14570000	2022-06-05	Former VOC Omicron GRA (B.1.1.529+BA.*) first detected in Botswana/Hong Kong/South Africa	GRA	BA.2.13.1	1	Other
Ontario CA	14570000	2022-06-12	Former VOC Omicron GRA (B.1.1.529+BA.*) first detected in Botswana/Hong Kong/South Africa	GRA	BA.2.13.1	1	Other
Ontario CA	14570000	2022-06-19	Former VOC Omicron GRA (B.1.1.529+BA.*) first detected in Botswana/Hong Kong/South Africa	GRA	BA.2.13.1	1	Other
Ontario CA	14570000	2022-06-26	Former VOC Omicron GRA (B.1.1.529+BA.*) first detected in Botswana/Hong Kong/South Africa	GRA	BA.2.13.1	4	Other
Ontario CA	14570000	2022-07-03	Former VOC Omicron GRA (B.1.1.529+BA.*) first detected in Botswana/Hong Kong/South Africa	GRA	BA.2.13.1	3	Other
Ontario CA	14570000	2022-07-10	Former VOC Omicron GRA (B.1.1.529+BA.*) first detected in Botswana/Hong Kong/South Africa	GRA	BA.2.13.1	7	Other
Ontario CA	14570000	2022-07-24	Former VOC Omicron GRA (B.1.1.529+BA.*) first detected in Botswana/Hong Kong/South Africa	GRA	BA.2.13.1	4	Other
Ontario CA	14570000	2022-08-07	Former VOC Omicron GRA (B.1.1.529+BA.*) first detected in Botswana/Hong Kong/South Africa	GRA	BA.2.13.1	1	Other
New York City	8419316	2022-03-06	Former VOC Omicron GRA (B.1.1.529+BA.*) first detected in Botswana/Hong Kong/South Africa	GRA	BA.2.14	2	Other
New York City	8419316	2022-03-13	Former VOC Omicron GRA (B.1.1.529+BA.*) first detected in Botswana/Hong Kong/South Africa	GRA	BA.2.14	2	Other
New York City	8419316	2022-03-20	Former VOC Omicron GRA (B.1.1.529+BA.*) first detected in Botswana/Hong Kong/South Africa	GRA	BA.2.14	2	Other
New York City	8419316	2022-03-27	Former VOC Omicron GRA (B.1.1.529+BA.*) first detected in Botswana/Hong Kong/South Africa	GRA	BA.2.14	1	Other
New York City	8419316	2022-04-03	Former VOC Omicron GRA (B.1.1.529+BA.*) first detected in Botswana/Hong Kong/South Africa	GRA	BA.2.14	3	Other
New York City	8419316	2022-04-17	Former VOC Omicron GRA (B.1.1.529+BA.*) first detected in Botswana/Hong Kong/South Africa	GRA	BA.2.14	4	Other
New York City	8419316	2022-04-24	Former VOC Omicron GRA (B.1.1.529+BA.*) first detected in Botswana/Hong Kong/South Africa	GRA	BA.2.14	3	Other
New York City	8419316	2022-05-01	Former VOC Omicron GRA (B.1.1.529+BA.*) first detected in Botswana/Hong Kong/South Africa	GRA	BA.2.14	1	Other
New York City	8419316	2022-05-08	Former VOC Omicron GRA (B.1.1.529+BA.*) first detected in Botswana/Hong Kong/South Africa	GRA	BA.2.14	1	Other
New York City	8419316	2022-05-15	Former VOC Omicron GRA (B.1.1.529+BA.*) first detected in Botswana/Hong Kong/South Africa	GRA	BA.2.14	1	Other
New York City	8419316	2022-05-22	Former VOC Omicron GRA (B.1.1.529+BA.*) first detected in Botswana/Hong Kong/South Africa	GRA	BA.2.14	1	Other
New York City	8419316	2022-05-29	Former VOC Omicron GRA (B.1.1.529+BA.*) first detected in Botswana/Hong Kong/South Africa	GRA	BA.2.14	1	Other
New York City	8419316	2022-04-17	Former VOC Omicron GRA (B.1.1.529+BA.*) first detected in Botswana/Hong Kong/South Africa	GRA	BA.2.15	1	Other
Ontario CA	14570000	2022-06-05	Former VOC Omicron GRA (B.1.1.529+BA.*) first detected in Botswana/Hong Kong/South Africa	GRA	BA.2.15	1	Other
New York City	8419316	2022-04-24	Former VOC Omicron GRA (B.1.1.529+BA.*) first detected in Botswana/Hong Kong/South Africa	GRA	BA.2.17	1	Other
Ontario CA	14570000	2022-03-27	Former VOC Omicron GRA (B.1.1.529+BA.*) first detected in Botswana/Hong Kong/South Africa	GRA	BA.2.17	1	Other
Capital Region	1083201	2022-03-27	Former VOC Omicron GRA (B.1.1.529+BA.*) first detected in Botswana/Hong Kong/South Africa	GRA	BA.2.18	1	Other
Capital Region	1083201	2022-04-24	Former VOC Omicron GRA (B.1.1.529+BA.*) first detected in Botswana/Hong Kong/South Africa	GRA	BA.2.18	1	Other
Mid-Hudson	2319719	2022-04-10	Former VOC Omicron GRA (B.1.1.529+BA.*) first detected in Botswana/Hong Kong/South Africa	GRA	BA.2.18	1	Other
Mid-Hudson	2319719	2022-05-01	Former VOC Omicron GRA (B.1.1.529+BA.*) first detected in Botswana/Hong Kong/South Africa	GRA	BA.2.18	1	Other
Mid-Hudson	2319719	2022-05-15	Former VOC Omicron GRA (B.1.1.529+BA.*) first detected in Botswana/Hong Kong/South Africa	GRA	BA.2.18	1	Other
New York City	8419316	2022-03-27	Former VOC Omicron GRA (B.1.1.529+BA.*) first detected in Botswana/Hong Kong/South Africa	GRA	BA.2.18	2	Other
New York City	8419316	2022-04-10	Former VOC Omicron GRA (B.1.1.529+BA.*) first detected in Botswana/Hong Kong/South Africa	GRA	BA.2.18	6	Other
New York City	8419316	2022-04-17	Former VOC Omicron GRA (B.1.1.529+BA.*) first detected in Botswana/Hong Kong/South Africa	GRA	BA.2.18	11	Other
New York City	8419316	2022-04-24	Former VOC Omicron GRA (B.1.1.529+BA.*) first detected in Botswana/Hong Kong/South Africa	GRA	BA.2.18	5	Other
New York City	8419316	2022-05-01	Former VOC Omicron GRA (B.1.1.529+BA.*) first detected in Botswana/Hong Kong/South Africa	GRA	BA.2.18	15	Other
New York City	8419316	2022-05-08	Former VOC Omicron GRA (B.1.1.529+BA.*) first detected in Botswana/Hong Kong/South Africa	GRA	BA.2.18	17	Other
New York City	8419316	2022-05-15	Former VOC Omicron GRA (B.1.1.529+BA.*) first detected in Botswana/Hong Kong/South Africa	GRA	BA.2.18	18	Other
New York City	8419316	2022-05-22	Former VOC Omicron GRA (B.1.1.529+BA.*) first detected in Botswana/Hong Kong/South Africa	GRA	BA.2.18	17	Other
New York City	8419316	2022-05-29	Former VOC Omicron GRA (B.1.1.529+BA.*) first detected in Botswana/Hong Kong/South Africa	GRA	BA.2.18	17	Other
New York City	8419316	2022-06-05	Former VOC Omicron GRA (B.1.1.529+BA.*) first detected in Botswana/Hong Kong/South Africa	GRA	BA.2.18	21	Other
New York City	8419316	2022-06-12	Former VOC Omicron GRA (B.1.1.529+BA.*) first detected in Botswana/Hong Kong/South Africa	GRA	BA.2.18	18	Other
New York City	8419316	2022-06-19	Former VOC Omicron GRA (B.1.1.529+BA.*) first detected in Botswana/Hong Kong/South Africa	GRA	BA.2.18	8	Other
New York City	8419316	2022-06-26	Former VOC Omicron GRA (B.1.1.529+BA.*) first detected in Botswana/Hong Kong/South Africa	GRA	BA.2.18	10	Other
New York City	8419316	2022-07-03	Former VOC Omicron GRA (B.1.1.529+BA.*) first detected in Botswana/Hong Kong/South Africa	GRA	BA.2.18	9	Other
New York City	8419316	2022-07-10	Former VOC Omicron GRA (B.1.1.529+BA.*) first detected in Botswana/Hong Kong/South Africa	GRA	BA.2.18	1	Other
New York City	8419316	2022-07-24	Former VOC Omicron GRA (B.1.1.529+BA.*) first detected in Botswana/Hong Kong/South Africa	GRA	BA.2.18	1	Other
New York City	8419316	2022-07-31	Former VOC Omicron GRA (B.1.1.529+BA.*) first detected in Botswana/Hong Kong/South Africa	GRA	BA.2.18	1	Other
New York City	8419316	2022-08-21	Former VOC Omicron GRA (B.1.1.529+BA.*) first detected in Botswana/Hong Kong/South Africa	GRA	BA.2.18	1	Other
Western New York	1382480	2022-05-01	Former VOC Omicron GRA (B.1.1.529+BA.*) first detected in Botswana/Hong Kong/South Africa	GRA	BA.2.18	1	Other
Western New York	1382480	2022-05-29	Former VOC Omicron GRA (B.1.1.529+BA.*) first detected in Botswana/Hong Kong/South Africa	GRA	BA.2.18	1	Other
Western New York	1382480	2022-06-05	Former VOC Omicron GRA (B.1.1.529+BA.*) first detected in Botswana/Hong Kong/South Africa	GRA	BA.2.18	1	Other
Western New York	1382480	2022-06-26	Former VOC Omicron GRA (B.1.1.529+BA.*) first detected in Botswana/Hong Kong/South Africa	GRA	BA.2.18	1	Other
Ontario CA	14570000	2022-03-20	Former VOC Omicron GRA (B.1.1.529+BA.*) first detected in Botswana/Hong Kong/South Africa	GRA	BA.2.18	2	Other
Ontario CA	14570000	2022-04-10	Former VOC Omicron GRA (B.1.1.529+BA.*) first detected in Botswana/Hong Kong/South Africa	GRA	BA.2.18	1	Other
Ontario CA	14570000	2022-05-08	Former VOC Omicron GRA (B.1.1.529+BA.*) first detected in Botswana/Hong Kong/South Africa	GRA	BA.2.18	2	Other
Ontario CA	14570000	2022-05-15	Former VOC Omicron GRA (B.1.1.529+BA.*) first detected in Botswana/Hong Kong/South Africa	GRA	BA.2.18	3	Other
Ontario CA	14570000	2022-05-22	Former VOC Omicron GRA (B.1.1.529+BA.*) first detected in Botswana/Hong Kong/South Africa	GRA	BA.2.18	5	Other
Ontario CA	14570000	2022-05-29	Former VOC Omicron GRA (B.1.1.529+BA.*) first detected in Botswana/Hong Kong/South Africa	GRA	BA.2.18	3	Other
Ontario CA	14570000	2022-06-05	Former VOC Omicron GRA (B.1.1.529+BA.*) first detected in Botswana/Hong Kong/South Africa	GRA	BA.2.18	1	Other
Ontario CA	14570000	2022-06-12	Former VOC Omicron GRA (B.1.1.529+BA.*) first detected in Botswana/Hong Kong/South Africa	GRA	BA.2.18	4	Other
Ontario CA	14570000	2022-06-19	Former VOC Omicron GRA (B.1.1.529+BA.*) first detected in Botswana/Hong Kong/South Africa	GRA	BA.2.18	1	Other
Ontario CA	14570000	2022-06-26	Former VOC Omicron GRA (B.1.1.529+BA.*) first detected in Botswana/Hong Kong/South Africa	GRA	BA.2.18	3	Other
Ontario CA	14570000	2022-07-03	Former VOC Omicron GRA (B.1.1.529+BA.*) first detected in Botswana/Hong Kong/South Africa	GRA	BA.2.18	3	Other
Ontario CA	14570000	2022-07-10	Former VOC Omicron GRA (B.1.1.529+BA.*) first detected in Botswana/Hong Kong/South Africa	GRA	BA.2.18	4	Other
Ontario CA	14570000	2022-08-21	Former VOC Omicron GRA (B.1.1.529+BA.*) first detected in Botswana/Hong Kong/South Africa	GRA	BA.2.18	1	Other
New York City	8419316	2022-02-27	Former VOC Omicron GRA (B.1.1.529+BA.*) first detected in Botswana/Hong Kong/South Africa	GRA	BA.2.2	3	Other
New York City	8419316	2022-03-06	Former VOC Omicron GRA (B.1.1.529+BA.*) first detected in Botswana/Hong Kong/South Africa	GRA	BA.2.2	1	Other
New York City	8419316	2022-03-20	Former VOC Omicron GRA (B.1.1.529+BA.*) first detected in Botswana/Hong Kong/South Africa	GRA	BA.2.2	2	Other
New York City	8419316	2022-03-27	Former VOC Omicron GRA (B.1.1.529+BA.*) first detected in Botswana/Hong Kong/South Africa	GRA	BA.2.2	1	Other
New York City	8419316	2022-08-21	Former VOC Omicron GRA (B.1.1.529+BA.*) first detected in Botswana/Hong Kong/South Africa	GRA	BA.2.2	1	Other
New York City	8419316	2022-01-02	Former VOC Omicron GRA (B.1.1.529+BA.*) first detected in Botswana/Hong Kong/South Africa	GRA	BA.2.2.1	28	Other
New York City	8419316	2022-01-09	Former VOC Omicron GRA (B.1.1.529+BA.*) first detected in Botswana/Hong Kong/South Africa	GRA	BA.2.2.1	15	Other
New York City	8419316	2022-01-16	Former VOC Omicron GRA (B.1.1.529+BA.*) first detected in Botswana/Hong Kong/South Africa	GRA	BA.2.2.1	12	Other
New York City	8419316	2022-01-23	Former VOC Omicron GRA (B.1.1.529+BA.*) first detected in Botswana/Hong Kong/South Africa	GRA	BA.2.2.1	9	Other
New York City	8419316	2022-01-30	Former VOC Omicron GRA (B.1.1.529+BA.*) first detected in Botswana/Hong Kong/South Africa	GRA	BA.2.2.1	6	Other
New York City	8419316	2022-02-06	Former VOC Omicron GRA (B.1.1.529+BA.*) first detected in Botswana/Hong Kong/South Africa	GRA	BA.2.2.1	1	Other
New York City	8419316	2022-02-20	Former VOC Omicron GRA (B.1.1.529+BA.*) first detected in Botswana/Hong Kong/South Africa	GRA	BA.2.2.1	1	Other
New York City	8419316	2022-02-27	Former VOC Omicron GRA (B.1.1.529+BA.*) first detected in Botswana/Hong Kong/South Africa	GRA	BA.2.2.1	1	Other
New York City	8419316	2022-03-06	Former VOC Omicron GRA (B.1.1.529+BA.*) first detected in Botswana/Hong Kong/South Africa	GRA	BA.2.2.1	1	Other
Capital Region	1083201	2022-04-10	Former VOC Omicron GRA (B.1.1.529+BA.*) first detected in Botswana/Hong Kong/South Africa	GRA	BA.2.20	1	Other
Central New York	777706	2022-04-03	Former VOC Omicron GRA (B.1.1.529+BA.*) first detected in Botswana/Hong Kong/South Africa	GRA	BA.2.20	1	Other
Central New York	777706	2022-05-08	Former VOC Omicron GRA (B.1.1.529+BA.*) first detected in Botswana/Hong Kong/South Africa	GRA	BA.2.20	1	Other
Central New York	777706	2022-06-26	Former VOC Omicron GRA (B.1.1.529+BA.*) first detected in Botswana/Hong Kong/South Africa	GRA	BA.2.20	1	Other
Finger Lakes	1205380	2022-03-20	Former VOC Omicron GRA (B.1.1.529+BA.*) first detected in Botswana/Hong Kong/South Africa	GRA	BA.2.20	1	Other
Finger Lakes	1205380	2022-05-08	Former VOC Omicron GRA (B.1.1.529+BA.*) first detected in Botswana/Hong Kong/South Africa	GRA	BA.2.20	1	Other
Mid-Hudson	2319719	2022-05-01	Former VOC Omicron GRA (B.1.1.529+BA.*) first detected in Botswana/Hong Kong/South Africa	GRA	BA.2.20	1	Other
New York City	8419316	2022-03-20	Former VOC Omicron GRA (B.1.1.529+BA.*) first detected in Botswana/Hong Kong/South Africa	GRA	BA.2.20	2	Other
New York City	8419316	2022-03-27	Former VOC Omicron GRA (B.1.1.529+BA.*) first detected in Botswana/Hong Kong/South Africa	GRA	BA.2.20	8	Other
New York City	8419316	2022-04-03	Former VOC Omicron GRA (B.1.1.529+BA.*) first detected in Botswana/Hong Kong/South Africa	GRA	BA.2.20	5	Other
New York City	8419316	2022-04-10	Former VOC Omicron GRA (B.1.1.529+BA.*) first detected in Botswana/Hong Kong/South Africa	GRA	BA.2.20	3	Other
New York City	8419316	2022-04-17	Former VOC Omicron GRA (B.1.1.529+BA.*) first detected in Botswana/Hong Kong/South Africa	GRA	BA.2.20	9	Other
New York City	8419316	2022-04-24	Former VOC Omicron GRA (B.1.1.529+BA.*) first detected in Botswana/Hong Kong/South Africa	GRA	BA.2.20	10	Other
New York City	8419316	2022-05-01	Former VOC Omicron GRA (B.1.1.529+BA.*) first detected in Botswana/Hong Kong/South Africa	GRA	BA.2.20	2	Other
New York City	8419316	2022-05-08	Former VOC Omicron GRA (B.1.1.529+BA.*) first detected in Botswana/Hong Kong/South Africa	GRA	BA.2.20	4	Other
New York City	8419316	2022-05-15	Former VOC Omicron GRA (B.1.1.529+BA.*) first detected in Botswana/Hong Kong/South Africa	GRA	BA.2.20	11	Other
New York City	8419316	2022-05-22	Former VOC Omicron GRA (B.1.1.529+BA.*) first detected in Botswana/Hong Kong/South Africa	GRA	BA.2.20	4	Other
New York City	8419316	2022-05-29	Former VOC Omicron GRA (B.1.1.529+BA.*) first detected in Botswana/Hong Kong/South Africa	GRA	BA.2.20	4	Other
New York City	8419316	2022-06-05	Former VOC Omicron GRA (B.1.1.529+BA.*) first detected in Botswana/Hong Kong/South Africa	GRA	BA.2.20	3	Other
Western New York	1382480	2022-04-24	Former VOC Omicron GRA (B.1.1.529+BA.*) first detected in Botswana/Hong Kong/South Africa	GRA	BA.2.20	2	Other
Ontario CA	14570000	2022-01-09	Former VOC Omicron GRA (B.1.1.529+BA.*) first detected in Botswana/Hong Kong/South Africa	GRA	BA.2.20	1	Other
Ontario CA	14570000	2022-02-13	Former VOC Omicron GRA (B.1.1.529+BA.*) first detected in Botswana/Hong Kong/South Africa	GRA	BA.2.20	3	Other
Ontario CA	14570000	2022-02-20	Former VOC Omicron GRA (B.1.1.529+BA.*) first detected in Botswana/Hong Kong/South Africa	GRA	BA.2.20	1	Other
Ontario CA	14570000	2022-02-27	Former VOC Omicron GRA (B.1.1.529+BA.*) first detected in Botswana/Hong Kong/South Africa	GRA	BA.2.20	10	Other
Ontario CA	14570000	2022-03-06	Former VOC Omicron GRA (B.1.1.529+BA.*) first detected in Botswana/Hong Kong/South Africa	GRA	BA.2.20	16	Other
Ontario CA	14570000	2022-03-13	Former VOC Omicron GRA (B.1.1.529+BA.*) first detected in Botswana/Hong Kong/South Africa	GRA	BA.2.20	47	Other
Ontario CA	14570000	2022-03-20	Former VOC Omicron GRA (B.1.1.529+BA.*) first detected in Botswana/Hong Kong/South Africa	GRA	BA.2.20	101	Other
Ontario CA	14570000	2022-03-27	Former VOC Omicron GRA (B.1.1.529+BA.*) first detected in Botswana/Hong Kong/South Africa	GRA	BA.2.20	85	Other
Ontario CA	14570000	2022-04-03	Former VOC Omicron GRA (B.1.1.529+BA.*) first detected in Botswana/Hong Kong/South Africa	GRA	BA.2.20	103	Other
Ontario CA	14570000	2022-04-10	Former VOC Omicron GRA (B.1.1.529+BA.*) first detected in Botswana/Hong Kong/South Africa	GRA	BA.2.20	75	Other
Ontario CA	14570000	2022-04-17	Former VOC Omicron GRA (B.1.1.529+BA.*) first detected in Botswana/Hong Kong/South Africa	GRA	BA.2.20	71	Other
Ontario CA	14570000	2022-04-24	Former VOC Omicron GRA (B.1.1.529+BA.*) first detected in Botswana/Hong Kong/South Africa	GRA	BA.2.20	34	Other
Ontario CA	14570000	2022-05-01	Former VOC Omicron GRA (B.1.1.529+BA.*) first detected in Botswana/Hong Kong/South Africa	GRA	BA.2.20	25	Other
Ontario CA	14570000	2022-05-08	Former VOC Omicron GRA (B.1.1.529+BA.*) first detected in Botswana/Hong Kong/South Africa	GRA	BA.2.20	37	Other
Ontario CA	14570000	2022-05-15	Former VOC Omicron GRA (B.1.1.529+BA.*) first detected in Botswana/Hong Kong/South Africa	GRA	BA.2.20	14	Other
Ontario CA	14570000	2022-05-22	Former VOC Omicron GRA (B.1.1.529+BA.*) first detected in Botswana/Hong Kong/South Africa	GRA	BA.2.20	11	Other
Ontario CA	14570000	2022-05-29	Former VOC Omicron GRA (B.1.1.529+BA.*) first detected in Botswana/Hong Kong/South Africa	GRA	BA.2.20	12	Other
Ontario CA	14570000	2022-06-05	Former VOC Omicron GRA (B.1.1.529+BA.*) first detected in Botswana/Hong Kong/South Africa	GRA	BA.2.20	13	Other
Ontario CA	14570000	2022-06-12	Former VOC Omicron GRA (B.1.1.529+BA.*) first detected in Botswana/Hong Kong/South Africa	GRA	BA.2.20	7	Other
Ontario CA	14570000	2022-06-19	Former VOC Omicron GRA (B.1.1.529+BA.*) first detected in Botswana/Hong Kong/South Africa	GRA	BA.2.20	6	Other
Ontario CA	14570000	2022-06-26	Former VOC Omicron GRA (B.1.1.529+BA.*) first detected in Botswana/Hong Kong/South Africa	GRA	BA.2.20	3	Other
Ontario CA	14570000	2022-07-03	Former VOC Omicron GRA (B.1.1.529+BA.*) first detected in Botswana/Hong Kong/South Africa	GRA	BA.2.20	3	Other
Mid-Hudson	2319719	2022-04-24	Former VOC Omicron GRA (B.1.1.529+BA.*) first detected in Botswana/Hong Kong/South Africa	GRA	BA.2.21	1	Other
New York City	8419316	2022-02-27	Former VOC Omicron GRA (B.1.1.529+BA.*) first detected in Botswana/Hong Kong/South Africa	GRA	BA.2.21	2	Other
New York City	8419316	2022-03-20	Former VOC Omicron GRA (B.1.1.529+BA.*) first detected in Botswana/Hong Kong/South Africa	GRA	BA.2.21	7	Other
New York City	8419316	2022-03-27	Former VOC Omicron GRA (B.1.1.529+BA.*) first detected in Botswana/Hong Kong/South Africa	GRA	BA.2.21	7	Other
New York City	8419316	2022-04-03	Former VOC Omicron GRA (B.1.1.529+BA.*) first detected in Botswana/Hong Kong/South Africa	GRA	BA.2.21	28	Other
New York City	8419316	2022-04-10	Former VOC Omicron GRA (B.1.1.529+BA.*) first detected in Botswana/Hong Kong/South Africa	GRA	BA.2.21	18	Other
New York City	8419316	2022-04-17	Former VOC Omicron GRA (B.1.1.529+BA.*) first detected in Botswana/Hong Kong/South Africa	GRA	BA.2.21	24	Other
New York City	8419316	2022-04-24	Former VOC Omicron GRA (B.1.1.529+BA.*) first detected in Botswana/Hong Kong/South Africa	GRA	BA.2.21	16	Other
New York City	8419316	2022-05-01	Former VOC Omicron GRA (B.1.1.529+BA.*) first detected in Botswana/Hong Kong/South Africa	GRA	BA.2.21	12	Other
New York City	8419316	2022-05-08	Former VOC Omicron GRA (B.1.1.529+BA.*) first detected in Botswana/Hong Kong/South Africa	GRA	BA.2.21	10	Other
New York City	8419316	2022-05-15	Former VOC Omicron GRA (B.1.1.529+BA.*) first detected in Botswana/Hong Kong/South Africa	GRA	BA.2.21	10	Other
New York City	8419316	2022-05-22	Former VOC Omicron GRA (B.1.1.529+BA.*) first detected in Botswana/Hong Kong/South Africa	GRA	BA.2.21	4	Other
New York City	8419316	2022-05-29	Former VOC Omicron GRA (B.1.1.529+BA.*) first detected in Botswana/Hong Kong/South Africa	GRA	BA.2.21	3	Other
New York City	8419316	2022-06-05	Former VOC Omicron GRA (B.1.1.529+BA.*) first detected in Botswana/Hong Kong/South Africa	GRA	BA.2.21	2	Other
Western New York	1382480	2022-04-10	Former VOC Omicron GRA (B.1.1.529+BA.*) first detected in Botswana/Hong Kong/South Africa	GRA	BA.2.21	1	Other
Ontario CA	14570000	2022-03-06	Former VOC Omicron GRA (B.1.1.529+BA.*) first detected in Botswana/Hong Kong/South Africa	GRA	BA.2.21	2	Other
Ontario CA	14570000	2022-03-13	Former VOC Omicron GRA (B.1.1.529+BA.*) first detected in Botswana/Hong Kong/South Africa	GRA	BA.2.21	5	Other
Ontario CA	14570000	2022-03-20	Former VOC Omicron GRA (B.1.1.529+BA.*) first detected in Botswana/Hong Kong/South Africa	GRA	BA.2.21	10	Other
Ontario CA	14570000	2022-03-27	Former VOC Omicron GRA (B.1.1.529+BA.*) first detected in Botswana/Hong Kong/South Africa	GRA	BA.2.21	14	Other
Ontario CA	14570000	2022-04-03	Former VOC Omicron GRA (B.1.1.529+BA.*) first detected in Botswana/Hong Kong/South Africa	GRA	BA.2.21	17	Other
Ontario CA	14570000	2022-04-10	Former VOC Omicron GRA (B.1.1.529+BA.*) first detected in Botswana/Hong Kong/South Africa	GRA	BA.2.21	9	Other
Ontario CA	14570000	2022-04-17	Former VOC Omicron GRA (B.1.1.529+BA.*) first detected in Botswana/Hong Kong/South Africa	GRA	BA.2.21	14	Other
Ontario CA	14570000	2022-04-24	Former VOC Omicron GRA (B.1.1.529+BA.*) first detected in Botswana/Hong Kong/South Africa	GRA	BA.2.21	16	Other
Ontario CA	14570000	2022-05-01	Former VOC Omicron GRA (B.1.1.529+BA.*) first detected in Botswana/Hong Kong/South Africa	GRA	BA.2.21	9	Other
Ontario CA	14570000	2022-05-08	Former VOC Omicron GRA (B.1.1.529+BA.*) first detected in Botswana/Hong Kong/South Africa	GRA	BA.2.21	11	Other
Ontario CA	14570000	2022-05-15	Former VOC Omicron GRA (B.1.1.529+BA.*) first detected in Botswana/Hong Kong/South Africa	GRA	BA.2.21	8	Other
Ontario CA	14570000	2022-05-22	Former VOC Omicron GRA (B.1.1.529+BA.*) first detected in Botswana/Hong Kong/South Africa	GRA	BA.2.21	10	Other
Ontario CA	14570000	2022-05-29	Former VOC Omicron GRA (B.1.1.529+BA.*) first detected in Botswana/Hong Kong/South Africa	GRA	BA.2.21	2	Other
Ontario CA	14570000	2022-06-05	Former VOC Omicron GRA (B.1.1.529+BA.*) first detected in Botswana/Hong Kong/South Africa	GRA	BA.2.21	6	Other
Ontario CA	14570000	2022-06-12	Former VOC Omicron GRA (B.1.1.529+BA.*) first detected in Botswana/Hong Kong/South Africa	GRA	BA.2.21	8	Other
Ontario CA	14570000	2022-06-19	Former VOC Omicron GRA (B.1.1.529+BA.*) first detected in Botswana/Hong Kong/South Africa	GRA	BA.2.21	53	Other
Ontario CA	14570000	2022-06-26	Former VOC Omicron GRA (B.1.1.529+BA.*) first detected in Botswana/Hong Kong/South Africa	GRA	BA.2.21	14	Other
Ontario CA	14570000	2022-07-03	Former VOC Omicron GRA (B.1.1.529+BA.*) first detected in Botswana/Hong Kong/South Africa	GRA	BA.2.21	4	Other
Ontario CA	14570000	2022-07-10	Former VOC Omicron GRA (B.1.1.529+BA.*) first detected in Botswana/Hong Kong/South Africa	GRA	BA.2.21	1	Other
Ontario CA	14570000	2022-07-17	Former VOC Omicron GRA (B.1.1.529+BA.*) first detected in Botswana/Hong Kong/South Africa	GRA	BA.2.21	2	Other
Ontario CA	14570000	2022-07-31	Former VOC Omicron GRA (B.1.1.529+BA.*) first detected in Botswana/Hong Kong/South Africa	GRA	BA.2.21	1	Other
New York City	8419316	2022-04-24	Former VOC Omicron GRA (B.1.1.529+BA.*) first detected in Botswana/Hong Kong/South Africa	GRA	BA.2.22	2	Other
New York City	8419316	2022-05-01	Former VOC Omicron GRA (B.1.1.529+BA.*) first detected in Botswana/Hong Kong/South Africa	GRA	BA.2.22	1	Other
New York City	8419316	2022-05-15	Former VOC Omicron GRA (B.1.1.529+BA.*) first detected in Botswana/Hong Kong/South Africa	GRA	BA.2.22	1	Other
New York City	8419316	2022-05-22	Former VOC Omicron GRA (B.1.1.529+BA.*) first detected in Botswana/Hong Kong/South Africa	GRA	BA.2.22	1	Other
Capital Region	1083201	2022-05-01	Former VOC Omicron GRA (B.1.1.529+BA.*) first detected in Botswana/Hong Kong/South Africa	GRA	BA.2.23	1	Other
Finger Lakes	1205380	2022-04-03	Former VOC Omicron GRA (B.1.1.529+BA.*) first detected in Botswana/Hong Kong/South Africa	GRA	BA.2.23	1	Other
Finger Lakes	1205380	2022-06-05	Former VOC Omicron GRA (B.1.1.529+BA.*) first detected in Botswana/Hong Kong/South Africa	GRA	BA.2.23	1	Other
Mid-Hudson	2319719	2022-05-08	Former VOC Omicron GRA (B.1.1.529+BA.*) first detected in Botswana/Hong Kong/South Africa	GRA	BA.2.23	2	Other
Mid-Hudson	2319719	2022-05-29	Former VOC Omicron GRA (B.1.1.529+BA.*) first detected in Botswana/Hong Kong/South Africa	GRA	BA.2.23	1	Other
New York City	8419316	2022-02-20	Former VOC Omicron GRA (B.1.1.529+BA.*) first detected in Botswana/Hong Kong/South Africa	GRA	BA.2.23	1	Other
New York City	8419316	2022-03-06	Former VOC Omicron GRA (B.1.1.529+BA.*) first detected in Botswana/Hong Kong/South Africa	GRA	BA.2.23	2	Other
New York City	8419316	2022-03-13	Former VOC Omicron GRA (B.1.1.529+BA.*) first detected in Botswana/Hong Kong/South Africa	GRA	BA.2.23	3	Other
New York City	8419316	2022-03-20	Former VOC Omicron GRA (B.1.1.529+BA.*) first detected in Botswana/Hong Kong/South Africa	GRA	BA.2.23	4	Other
New York City	8419316	2022-03-27	Former VOC Omicron GRA (B.1.1.529+BA.*) first detected in Botswana/Hong Kong/South Africa	GRA	BA.2.23	3	Other
New York City	8419316	2022-04-03	Former VOC Omicron GRA (B.1.1.529+BA.*) first detected in Botswana/Hong Kong/South Africa	GRA	BA.2.23	21	Other
New York City	8419316	2022-04-10	Former VOC Omicron GRA (B.1.1.529+BA.*) first detected in Botswana/Hong Kong/South Africa	GRA	BA.2.23	20	Other
New York City	8419316	2022-04-17	Former VOC Omicron GRA (B.1.1.529+BA.*) first detected in Botswana/Hong Kong/South Africa	GRA	BA.2.23	9	Other
New York City	8419316	2022-04-24	Former VOC Omicron GRA (B.1.1.529+BA.*) first detected in Botswana/Hong Kong/South Africa	GRA	BA.2.23	16	Other
New York City	8419316	2022-05-01	Former VOC Omicron GRA (B.1.1.529+BA.*) first detected in Botswana/Hong Kong/South Africa	GRA	BA.2.23	18	Other
New York City	8419316	2022-05-08	Former VOC Omicron GRA (B.1.1.529+BA.*) first detected in Botswana/Hong Kong/South Africa	GRA	BA.2.23	23	Other
New York City	8419316	2022-05-15	Former VOC Omicron GRA (B.1.1.529+BA.*) first detected in Botswana/Hong Kong/South Africa	GRA	BA.2.23	41	Other
New York City	8419316	2022-05-22	Former VOC Omicron GRA (B.1.1.529+BA.*) first detected in Botswana/Hong Kong/South Africa	GRA	BA.2.23	18	Other
New York City	8419316	2022-05-29	Former VOC Omicron GRA (B.1.1.529+BA.*) first detected in Botswana/Hong Kong/South Africa	GRA	BA.2.23	8	Other
New York City	8419316	2022-06-05	Former VOC Omicron GRA (B.1.1.529+BA.*) first detected in Botswana/Hong Kong/South Africa	GRA	BA.2.23	5	Other
New York City	8419316	2022-06-12	Former VOC Omicron GRA (B.1.1.529+BA.*) first detected in Botswana/Hong Kong/South Africa	GRA	BA.2.23	5	Other
New York City	8419316	2022-06-19	Former VOC Omicron GRA (B.1.1.529+BA.*) first detected in Botswana/Hong Kong/South Africa	GRA	BA.2.23	5	Other
New York City	8419316	2022-07-03	Former VOC Omicron GRA (B.1.1.529+BA.*) first detected in Botswana/Hong Kong/South Africa	GRA	BA.2.23	1	Other
Western New York	1382480	2022-04-03	Former VOC Omicron GRA (B.1.1.529+BA.*) first detected in Botswana/Hong Kong/South Africa	GRA	BA.2.23	1	Other
Ontario CA	14570000	2022-01-30	Former VOC Omicron GRA (B.1.1.529+BA.*) first detected in Botswana/Hong Kong/South Africa	GRA	BA.2.23	1	Other
Ontario CA	14570000	2022-02-20	Former VOC Omicron GRA (B.1.1.529+BA.*) first detected in Botswana/Hong Kong/South Africa	GRA	BA.2.23	1	Other
Ontario CA	14570000	2022-03-06	Former VOC Omicron GRA (B.1.1.529+BA.*) first detected in Botswana/Hong Kong/South Africa	GRA	BA.2.23	2	Other
Ontario CA	14570000	2022-03-13	Former VOC Omicron GRA (B.1.1.529+BA.*) first detected in Botswana/Hong Kong/South Africa	GRA	BA.2.23	2	Other
Ontario CA	14570000	2022-03-20	Former VOC Omicron GRA (B.1.1.529+BA.*) first detected in Botswana/Hong Kong/South Africa	GRA	BA.2.23	3	Other
Ontario CA	14570000	2022-03-27	Former VOC Omicron GRA (B.1.1.529+BA.*) first detected in Botswana/Hong Kong/South Africa	GRA	BA.2.23	8	Other
Ontario CA	14570000	2022-04-03	Former VOC Omicron GRA (B.1.1.529+BA.*) first detected in Botswana/Hong Kong/South Africa	GRA	BA.2.23	5	Other
Ontario CA	14570000	2022-04-10	Former VOC Omicron GRA (B.1.1.529+BA.*) first detected in Botswana/Hong Kong/South Africa	GRA	BA.2.23	3	Other
Ontario CA	14570000	2022-04-17	Former VOC Omicron GRA (B.1.1.529+BA.*) first detected in Botswana/Hong Kong/South Africa	GRA	BA.2.23	1	Other
Ontario CA	14570000	2022-05-08	Former VOC Omicron GRA (B.1.1.529+BA.*) first detected in Botswana/Hong Kong/South Africa	GRA	BA.2.23	1	Other
Ontario CA	14570000	2022-05-22	Former VOC Omicron GRA (B.1.1.529+BA.*) first detected in Botswana/Hong Kong/South Africa	GRA	BA.2.23	1	Other
Ontario CA	14570000	2022-05-29	Former VOC Omicron GRA (B.1.1.529+BA.*) first detected in Botswana/Hong Kong/South Africa	GRA	BA.2.23	2	Other
Ontario CA	14570000	2022-06-05	Former VOC Omicron GRA (B.1.1.529+BA.*) first detected in Botswana/Hong Kong/South Africa	GRA	BA.2.23	4	Other
Ontario CA	14570000	2022-06-19	Former VOC Omicron GRA (B.1.1.529+BA.*) first detected in Botswana/Hong Kong/South Africa	GRA	BA.2.23	1	Other
Ontario CA	14570000	2022-07-10	Former VOC Omicron GRA (B.1.1.529+BA.*) first detected in Botswana/Hong Kong/South Africa	GRA	BA.2.23	2	Other
Mid-Hudson	2319719	2022-05-01	Former VOC Omicron GRA (B.1.1.529+BA.*) first detected in Botswana/Hong Kong/South Africa	GRA	BA.2.23.1	1	Other
Mid-Hudson	2319719	2022-06-19	Former VOC Omicron GRA (B.1.1.529+BA.*) first detected in Botswana/Hong Kong/South Africa	GRA	BA.2.23.1	1	Other
New York City	8419316	2022-04-10	Former VOC Omicron GRA (B.1.1.529+BA.*) first detected in Botswana/Hong Kong/South Africa	GRA	BA.2.23.1	1	Other
New York City	8419316	2022-04-24	Former VOC Omicron GRA (B.1.1.529+BA.*) first detected in Botswana/Hong Kong/South Africa	GRA	BA.2.23.1	2	Other
New York City	8419316	2022-05-01	Former VOC Omicron GRA (B.1.1.529+BA.*) first detected in Botswana/Hong Kong/South Africa	GRA	BA.2.23.1	2	Other
New York City	8419316	2022-05-15	Former VOC Omicron GRA (B.1.1.529+BA.*) first detected in Botswana/Hong Kong/South Africa	GRA	BA.2.23.1	3	Other
New York City	8419316	2022-05-22	Former VOC Omicron GRA (B.1.1.529+BA.*) first detected in Botswana/Hong Kong/South Africa	GRA	BA.2.23.1	3	Other
New York City	8419316	2022-05-29	Former VOC Omicron GRA (B.1.1.529+BA.*) first detected in Botswana/Hong Kong/South Africa	GRA	BA.2.23.1	2	Other
New York City	8419316	2022-06-05	Former VOC Omicron GRA (B.1.1.529+BA.*) first detected in Botswana/Hong Kong/South Africa	GRA	BA.2.23.1	1	Other
New York City	8419316	2022-04-24	Former VOC Omicron GRA (B.1.1.529+BA.*) first detected in Botswana/Hong Kong/South Africa	GRA	BA.2.24	1	Other
Ontario CA	14570000	2022-05-29	Former VOC Omicron GRA (B.1.1.529+BA.*) first detected in Botswana/Hong Kong/South Africa	GRA	BA.2.24	1	Other
Capital Region	1083201	2022-04-17	Former VOC Omicron GRA (B.1.1.529+BA.*) first detected in Botswana/Hong Kong/South Africa	GRA	BA.2.26	1	Other
Mid-Hudson	2319719	2022-03-06	Former VOC Omicron GRA (B.1.1.529+BA.*) first detected in Botswana/Hong Kong/South Africa	GRA	BA.2.26	1	Other
Mid-Hudson	2319719	2022-03-13	Former VOC Omicron GRA (B.1.1.529+BA.*) first detected in Botswana/Hong Kong/South Africa	GRA	BA.2.26	1	Other
Mid-Hudson	2319719	2022-03-20	Former VOC Omicron GRA (B.1.1.529+BA.*) first detected in Botswana/Hong Kong/South Africa	GRA	BA.2.26	2	Other
Mid-Hudson	2319719	2022-03-27	Former VOC Omicron GRA (B.1.1.529+BA.*) first detected in Botswana/Hong Kong/South Africa	GRA	BA.2.26	2	Other
Mid-Hudson	2319719	2022-04-03	Former VOC Omicron GRA (B.1.1.529+BA.*) first detected in Botswana/Hong Kong/South Africa	GRA	BA.2.26	3	Other
Mid-Hudson	2319719	2022-04-10	Former VOC Omicron GRA (B.1.1.529+BA.*) first detected in Botswana/Hong Kong/South Africa	GRA	BA.2.26	1	Other
Mid-Hudson	2319719	2022-04-17	Former VOC Omicron GRA (B.1.1.529+BA.*) first detected in Botswana/Hong Kong/South Africa	GRA	BA.2.26	1	Other
Mid-Hudson	2319719	2022-05-01	Former VOC Omicron GRA (B.1.1.529+BA.*) first detected in Botswana/Hong Kong/South Africa	GRA	BA.2.26	1	Other
Mid-Hudson	2319719	2022-05-08	Former VOC Omicron GRA (B.1.1.529+BA.*) first detected in Botswana/Hong Kong/South Africa	GRA	BA.2.26	1	Other
New York City	8419316	2022-02-27	Former VOC Omicron GRA (B.1.1.529+BA.*) first detected in Botswana/Hong Kong/South Africa	GRA	BA.2.26	7	Other
New York City	8419316	2022-03-06	Former VOC Omicron GRA (B.1.1.529+BA.*) first detected in Botswana/Hong Kong/South Africa	GRA	BA.2.26	25	Other
New York City	8419316	2022-03-13	Former VOC Omicron GRA (B.1.1.529+BA.*) first detected in Botswana/Hong Kong/South Africa	GRA	BA.2.26	45	Other
New York City	8419316	2022-03-20	Former VOC Omicron GRA (B.1.1.529+BA.*) first detected in Botswana/Hong Kong/South Africa	GRA	BA.2.26	87	Other
New York City	8419316	2022-03-27	Former VOC Omicron GRA (B.1.1.529+BA.*) first detected in Botswana/Hong Kong/South Africa	GR	BA.2.26	1	Other
New York City	8419316	2022-03-27	Former VOC Omicron GRA (B.1.1.529+BA.*) first detected in Botswana/Hong Kong/South Africa	GRA	BA.2.26	71	Other
New York City	8419316	2022-04-03	Former VOC Omicron GRA (B.1.1.529+BA.*) first detected in Botswana/Hong Kong/South Africa	GRA	BA.2.26	69	Other
New York City	8419316	2022-04-10	Former VOC Omicron GRA (B.1.1.529+BA.*) first detected in Botswana/Hong Kong/South Africa	GRA	BA.2.26	50	Other
New York City	8419316	2022-04-17	Former VOC Omicron GRA (B.1.1.529+BA.*) first detected in Botswana/Hong Kong/South Africa	GRA	BA.2.26	25	Other
New York City	8419316	2022-04-24	Former VOC Omicron GRA (B.1.1.529+BA.*) first detected in Botswana/Hong Kong/South Africa	GRA	BA.2.26	35	Other
New York City	8419316	2022-05-01	Former VOC Omicron GRA (B.1.1.529+BA.*) first detected in Botswana/Hong Kong/South Africa	GRA	BA.2.26	12	Other
New York City	8419316	2022-05-08	Former VOC Omicron GRA (B.1.1.529+BA.*) first detected in Botswana/Hong Kong/South Africa	GRA	BA.2.26	19	Other
New York City	8419316	2022-05-15	Former VOC Omicron GRA (B.1.1.529+BA.*) first detected in Botswana/Hong Kong/South Africa	GRA	BA.2.26	5	Other
New York City	8419316	2022-05-22	Former VOC Omicron GRA (B.1.1.529+BA.*) first detected in Botswana/Hong Kong/South Africa	GRA	BA.2.26	3	Other
New York City	8419316	2022-05-29	Former VOC Omicron GRA (B.1.1.529+BA.*) first detected in Botswana/Hong Kong/South Africa	GRA	BA.2.26	2	Other
Western New York	1382480	2022-03-13	Former VOC Omicron GRA (B.1.1.529+BA.*) first detected in Botswana/Hong Kong/South Africa	GRA	BA.2.26	1	Other
Western New York	1382480	2022-03-20	Former VOC Omicron GRA (B.1.1.529+BA.*) first detected in Botswana/Hong Kong/South Africa	GRA	BA.2.26	2	Other
Western New York	1382480	2022-03-27	Former VOC Omicron GRA (B.1.1.529+BA.*) first detected in Botswana/Hong Kong/South Africa	GRA	BA.2.26	4	Other
Western New York	1382480	2022-04-03	Former VOC Omicron GRA (B.1.1.529+BA.*) first detected in Botswana/Hong Kong/South Africa	GRA	BA.2.26	1	Other
Western New York	1382480	2022-04-10	Former VOC Omicron GRA (B.1.1.529+BA.*) first detected in Botswana/Hong Kong/South Africa	GRA	BA.2.26	2	Other
Western New York	1382480	2022-04-24	Former VOC Omicron GRA (B.1.1.529+BA.*) first detected in Botswana/Hong Kong/South Africa	GRA	BA.2.26	2	Other
Ontario CA	14570000	2022-04-03	Former VOC Omicron GRA (B.1.1.529+BA.*) first detected in Botswana/Hong Kong/South Africa	GRA	BA.2.26	1	Other
Ontario CA	14570000	2022-04-17	Former VOC Omicron GRA (B.1.1.529+BA.*) first detected in Botswana/Hong Kong/South Africa	GRA	BA.2.26	1	Other
Ontario CA	14570000	2022-04-24	Former VOC Omicron GRA (B.1.1.529+BA.*) first detected in Botswana/Hong Kong/South Africa	GRA	BA.2.26	2	Other
Ontario CA	14570000	2022-05-15	Former VOC Omicron GRA (B.1.1.529+BA.*) first detected in Botswana/Hong Kong/South Africa	GRA	BA.2.26	1	Other
Capital Region	1083201	2022-05-29	Former VOC Omicron GRA (B.1.1.529+BA.*) first detected in Botswana/Hong Kong/South Africa	GRA	BA.2.27	1	Other
New York City	8419316	2022-01-16	Former VOC Omicron GRA (B.1.1.529+BA.*) first detected in Botswana/Hong Kong/South Africa	GRA	BA.2.27	1	Other
New York City	8419316	2022-05-01	Former VOC Omicron GRA (B.1.1.529+BA.*) first detected in Botswana/Hong Kong/South Africa	GRA	BA.2.27	1	Other
Finger Lakes	1205380	2022-04-10	Former VOC Omicron GRA (B.1.1.529+BA.*) first detected in Botswana/Hong Kong/South Africa	GRA	BA.2.28	1	Other
New York City	8419316	2022-04-03	Former VOC Omicron GRA (B.1.1.529+BA.*) first detected in Botswana/Hong Kong/South Africa	GRA	BA.2.28	4	Other
New York City	8419316	2022-04-10	Former VOC Omicron GRA (B.1.1.529+BA.*) first detected in Botswana/Hong Kong/South Africa	GRA	BA.2.28	1	Other
New York City	8419316	2022-04-24	Former VOC Omicron GRA (B.1.1.529+BA.*) first detected in Botswana/Hong Kong/South Africa	GRA	BA.2.28	1	Other
New York City	8419316	2022-05-01	Former VOC Omicron GRA (B.1.1.529+BA.*) first detected in Botswana/Hong Kong/South Africa	GRA	BA.2.28	2	Other
New York City	8419316	2022-05-08	Former VOC Omicron GRA (B.1.1.529+BA.*) first detected in Botswana/Hong Kong/South Africa	GRA	BA.2.28	2	Other
New York City	8419316	2022-05-22	Former VOC Omicron GRA (B.1.1.529+BA.*) first detected in Botswana/Hong Kong/South Africa	GRA	BA.2.28	2	Other
New York City	8419316	2022-05-29	Former VOC Omicron GRA (B.1.1.529+BA.*) first detected in Botswana/Hong Kong/South Africa	GR	BA.2.28	1	Other
New York City	8419316	2022-05-29	Former VOC Omicron GRA (B.1.1.529+BA.*) first detected in Botswana/Hong Kong/South Africa	GRA	BA.2.28	1	Other
New York City	8419316	2022-06-05	Former VOC Omicron GRA (B.1.1.529+BA.*) first detected in Botswana/Hong Kong/South Africa	GRA	BA.2.28	1	Other
New York City	8419316	2022-06-19	Former VOC Omicron GRA (B.1.1.529+BA.*) first detected in Botswana/Hong Kong/South Africa	GRA	BA.2.28	1	Other
New York City	8419316	2022-06-26	Former VOC Omicron GRA (B.1.1.529+BA.*) first detected in Botswana/Hong Kong/South Africa	GRA	BA.2.28	2	Other
New York City	8419316	2022-05-01	Former VOC Omicron GRA (B.1.1.529+BA.*) first detected in Botswana/Hong Kong/South Africa	GRA	BA.2.29	1	Other
New York City	8419316	2022-05-01	Former VOC Omicron GRA (B.1.1.529+BA.*) first detected in Botswana/Hong Kong/South Africa	GRA	BA.2.3.1	1	Other
New York City	8419316	2022-03-20	Former VOC Omicron GRA (B.1.1.529+BA.*) first detected in Botswana/Hong Kong/South Africa	GRA	BA.2.3.10	1	Other
New York City	8419316	2022-03-27	Former VOC Omicron GRA (B.1.1.529+BA.*) first detected in Botswana/Hong Kong/South Africa	GRA	BA.2.3.10	6	Other
New York City	8419316	2022-04-03	Former VOC Omicron GRA (B.1.1.529+BA.*) first detected in Botswana/Hong Kong/South Africa	GRA	BA.2.3.10	20	Other
New York City	8419316	2022-04-10	Former VOC Omicron GRA (B.1.1.529+BA.*) first detected in Botswana/Hong Kong/South Africa	GRA	BA.2.3.10	19	Other
New York City	8419316	2022-04-17	Former VOC Omicron GRA (B.1.1.529+BA.*) first detected in Botswana/Hong Kong/South Africa	GRA	BA.2.3.10	7	Other
New York City	8419316	2022-04-24	Former VOC Omicron GRA (B.1.1.529+BA.*) first detected in Botswana/Hong Kong/South Africa	GRA	BA.2.3.10	8	Other
New York City	8419316	2022-05-01	Former VOC Omicron GRA (B.1.1.529+BA.*) first detected in Botswana/Hong Kong/South Africa	GRA	BA.2.3.10	6	Other
New York City	8419316	2022-05-08	Former VOC Omicron GRA (B.1.1.529+BA.*) first detected in Botswana/Hong Kong/South Africa	GRA	BA.2.3.10	3	Other
New York City	8419316	2022-05-22	Former VOC Omicron GRA (B.1.1.529+BA.*) first detected in Botswana/Hong Kong/South Africa	GRA	BA.2.3.10	2	Other
New York City	8419316	2022-06-12	Former VOC Omicron GRA (B.1.1.529+BA.*) first detected in Botswana/Hong Kong/South Africa	GRA	BA.2.3.10	1	Other
New York City	8419316	2022-07-24	Former VOC Omicron GRA (B.1.1.529+BA.*) first detected in Botswana/Hong Kong/South Africa	GRA	BA.2.3.10	1	Other
New York City	8419316	2022-07-31	Former VOC Omicron GRA (B.1.1.529+BA.*) first detected in Botswana/Hong Kong/South Africa	GRA	BA.2.3.10	1	Other
Ontario CA	14570000	2022-02-27	Former VOC Omicron GRA (B.1.1.529+BA.*) first detected in Botswana/Hong Kong/South Africa	GRA	BA.2.3.10	1	Other
Ontario CA	14570000	2022-03-20	Former VOC Omicron GRA (B.1.1.529+BA.*) first detected in Botswana/Hong Kong/South Africa	GRA	BA.2.3.10	2	Other
Ontario CA	14570000	2022-03-27	Former VOC Omicron GRA (B.1.1.529+BA.*) first detected in Botswana/Hong Kong/South Africa	GRA	BA.2.3.10	6	Other
Ontario CA	14570000	2022-04-03	Former VOC Omicron GRA (B.1.1.529+BA.*) first detected in Botswana/Hong Kong/South Africa	GRA	BA.2.3.10	6	Other
Ontario CA	14570000	2022-04-10	Former VOC Omicron GRA (B.1.1.529+BA.*) first detected in Botswana/Hong Kong/South Africa	GRA	BA.2.3.10	6	Other
Ontario CA	14570000	2022-04-17	Former VOC Omicron GRA (B.1.1.529+BA.*) first detected in Botswana/Hong Kong/South Africa	GRA	BA.2.3.10	5	Other
Ontario CA	14570000	2022-04-24	Former VOC Omicron GRA (B.1.1.529+BA.*) first detected in Botswana/Hong Kong/South Africa	GRA	BA.2.3.10	4	Other
Ontario CA	14570000	2022-05-01	Former VOC Omicron GRA (B.1.1.529+BA.*) first detected in Botswana/Hong Kong/South Africa	GRA	BA.2.3.10	3	Other
Ontario CA	14570000	2022-05-08	Former VOC Omicron GRA (B.1.1.529+BA.*) first detected in Botswana/Hong Kong/South Africa	GRA	BA.2.3.10	3	Other
Ontario CA	14570000	2022-05-15	Former VOC Omicron GRA (B.1.1.529+BA.*) first detected in Botswana/Hong Kong/South Africa	GRA	BA.2.3.10	3	Other
Ontario CA	14570000	2022-05-22	Former VOC Omicron GRA (B.1.1.529+BA.*) first detected in Botswana/Hong Kong/South Africa	GRA	BA.2.3.10	2	Other
Ontario CA	14570000	2022-06-05	Former VOC Omicron GRA (B.1.1.529+BA.*) first detected in Botswana/Hong Kong/South Africa	GRA	BA.2.3.10	1	Other
New York City	8419316	2022-03-27	Former VOC Omicron GRA (B.1.1.529+BA.*) first detected in Botswana/Hong Kong/South Africa	GRA	BA.2.3.12	1	Other
New York City	8419316	2022-04-03	Former VOC Omicron GRA (B.1.1.529+BA.*) first detected in Botswana/Hong Kong/South Africa	GRA	BA.2.3.12	1	Other
New York City	8419316	2022-05-01	Former VOC Omicron GRA (B.1.1.529+BA.*) first detected in Botswana/Hong Kong/South Africa	GRA	BA.2.3.12	2	Other
Western New York	1382480	2022-06-05	Former VOC Omicron GRA (B.1.1.529+BA.*) first detected in Botswana/Hong Kong/South Africa	GRA	BA.2.3.12	1	Other
Ontario CA	14570000	2022-03-06	Former VOC Omicron GRA (B.1.1.529+BA.*) first detected in Botswana/Hong Kong/South Africa	GRA	BA.2.3.12	2	Other
Ontario CA	14570000	2022-05-15	Former VOC Omicron GRA (B.1.1.529+BA.*) first detected in Botswana/Hong Kong/South Africa	GRA	BA.2.3.12	1	Other
New York City	8419316	2022-03-13	Former VOC Omicron GRA (B.1.1.529+BA.*) first detected in Botswana/Hong Kong/South Africa	GRA	BA.2.3.14	1	Other
New York City	8419316	2022-03-27	Former VOC Omicron GRA (B.1.1.529+BA.*) first detected in Botswana/Hong Kong/South Africa	GRA	BA.2.3.14	3	Other
New York City	8419316	2022-05-01	Former VOC Omicron GRA (B.1.1.529+BA.*) first detected in Botswana/Hong Kong/South Africa	GRA	BA.2.3.14	1	Other
New York City	8419316	2022-05-08	Former VOC Omicron GRA (B.1.1.529+BA.*) first detected in Botswana/Hong Kong/South Africa	GRA	BA.2.3.14	1	Other
New York City	8419316	2022-06-12	Former VOC Omicron GRA (B.1.1.529+BA.*) first detected in Botswana/Hong Kong/South Africa	GRA	BA.2.3.14	1	Other
Ontario CA	14570000	2022-04-24	Former VOC Omicron GRA (B.1.1.529+BA.*) first detected in Botswana/Hong Kong/South Africa	GRA	BA.2.3.14	1	Other
Ontario CA	14570000	2022-05-01	Former VOC Omicron GRA (B.1.1.529+BA.*) first detected in Botswana/Hong Kong/South Africa	GRA	BA.2.3.14	1	Other
Mid-Hudson	2319719	2022-04-10	Former VOC Omicron GRA (B.1.1.529+BA.*) first detected in Botswana/Hong Kong/South Africa	GRA	BA.2.3.15	1	Other
Mid-Hudson	2319719	2022-05-01	Former VOC Omicron GRA (B.1.1.529+BA.*) first detected in Botswana/Hong Kong/South Africa	GRA	BA.2.3.15	1	Other
New York City	8419316	2022-03-27	Former VOC Omicron GRA (B.1.1.529+BA.*) first detected in Botswana/Hong Kong/South Africa	GRA	BA.2.3.15	1	Other
New York City	8419316	2022-04-03	Former VOC Omicron GRA (B.1.1.529+BA.*) first detected in Botswana/Hong Kong/South Africa	GRA	BA.2.3.15	1	Other
New York City	8419316	2022-04-10	Former VOC Omicron GRA (B.1.1.529+BA.*) first detected in Botswana/Hong Kong/South Africa	GRA	BA.2.3.15	5	Other
New York City	8419316	2022-04-17	Former VOC Omicron GRA (B.1.1.529+BA.*) first detected in Botswana/Hong Kong/South Africa	GRA	BA.2.3.15	5	Other
New York City	8419316	2022-04-24	Former VOC Omicron GRA (B.1.1.529+BA.*) first detected in Botswana/Hong Kong/South Africa	GRA	BA.2.3.15	2	Other
New York City	8419316	2022-05-01	Former VOC Omicron GRA (B.1.1.529+BA.*) first detected in Botswana/Hong Kong/South Africa	GRA	BA.2.3.15	1	Other
New York City	8419316	2022-05-08	Former VOC Omicron GRA (B.1.1.529+BA.*) first detected in Botswana/Hong Kong/South Africa	GRA	BA.2.3.15	1	Other
New York City	8419316	2022-05-15	Former VOC Omicron GRA (B.1.1.529+BA.*) first detected in Botswana/Hong Kong/South Africa	GRA	BA.2.3.15	1	Other
New York City	8419316	2022-05-22	Former VOC Omicron GRA (B.1.1.529+BA.*) first detected in Botswana/Hong Kong/South Africa	GRA	BA.2.3.15	1	Other
New York City	8419316	2022-06-26	Former VOC Omicron GRA (B.1.1.529+BA.*) first detected in Botswana/Hong Kong/South Africa	GRA	BA.2.3.15	1	Other
Ontario CA	14570000	2022-04-17	Former VOC Omicron GRA (B.1.1.529+BA.*) first detected in Botswana/Hong Kong/South Africa	GRA	BA.2.3.15	1	Other
New York City	8419316	2022-05-01	Former VOC Omicron GRA (B.1.1.529+BA.*) first detected in Botswana/Hong Kong/South Africa	GRA	BA.2.3.16	1	Other
New York City	8419316	2022-05-29	Former VOC Omicron GRA (B.1.1.529+BA.*) first detected in Botswana/Hong Kong/South Africa	GRA	BA.2.3.16	1	Other
Ontario CA	14570000	2022-05-22	Former VOC Omicron GRA (B.1.1.529+BA.*) first detected in Botswana/Hong Kong/South Africa	GRA	BA.2.3.16	1	Other
Capital Region	1083201	2022-04-03	Former VOC Omicron GRA (B.1.1.529+BA.*) first detected in Botswana/Hong Kong/South Africa	GRA	BA.2.3.17	2	Other
Capital Region	1083201	2022-04-10	Former VOC Omicron GRA (B.1.1.529+BA.*) first detected in Botswana/Hong Kong/South Africa	GRA	BA.2.3.17	4	Other
Capital Region	1083201	2022-04-17	Former VOC Omicron GRA (B.1.1.529+BA.*) first detected in Botswana/Hong Kong/South Africa	GRA	BA.2.3.17	2	Other
Central New York	777706	2022-03-13	Former VOC Omicron GRA (B.1.1.529+BA.*) first detected in Botswana/Hong Kong/South Africa	GRA	BA.2.3.17	1	Other
Central New York	777706	2022-03-27	Former VOC Omicron GRA (B.1.1.529+BA.*) first detected in Botswana/Hong Kong/South Africa	GRA	BA.2.3.17	1	Other
Central New York	777706	2022-04-03	Former VOC Omicron GRA (B.1.1.529+BA.*) first detected in Botswana/Hong Kong/South Africa	GRA	BA.2.3.17	1	Other
Finger Lakes	1205380	2022-06-05	Former VOC Omicron GRA (B.1.1.529+BA.*) first detected in Botswana/Hong Kong/South Africa	GRA	BA.2.3.17	1	Other
Long Island	2840341	2022-04-10	Former VOC Omicron GRA (B.1.1.529+BA.*) first detected in Botswana/Hong Kong/South Africa	GRA	BA.2.3.17	1	Other
Mid-Hudson	2319719	2022-05-08	Former VOC Omicron GRA (B.1.1.529+BA.*) first detected in Botswana/Hong Kong/South Africa	GRA	BA.2.3.17	1	Other
New York City	8419316	2022-01-30	Former VOC Omicron GRA (B.1.1.529+BA.*) first detected in Botswana/Hong Kong/South Africa	GRA	BA.2.3.17	2	Other
New York City	8419316	2022-02-13	Former VOC Omicron GRA (B.1.1.529+BA.*) first detected in Botswana/Hong Kong/South Africa	GRA	BA.2.3.17	6	Other
New York City	8419316	2022-02-20	Former VOC Omicron GRA (B.1.1.529+BA.*) first detected in Botswana/Hong Kong/South Africa	GRA	BA.2.3.17	7	Other
New York City	8419316	2022-02-27	Former VOC Omicron GRA (B.1.1.529+BA.*) first detected in Botswana/Hong Kong/South Africa	GRA	BA.2.3.17	5	Other
New York City	8419316	2022-03-13	Former VOC Omicron GRA (B.1.1.529+BA.*) first detected in Botswana/Hong Kong/South Africa	GRA	BA.2.3.17	1	Other
New York City	8419316	2022-03-20	Former VOC Omicron GRA (B.1.1.529+BA.*) first detected in Botswana/Hong Kong/South Africa	GRA	BA.2.3.17	3	Other
New York City	8419316	2022-03-27	Former VOC Omicron GRA (B.1.1.529+BA.*) first detected in Botswana/Hong Kong/South Africa	GRA	BA.2.3.17	5	Other
New York City	8419316	2022-04-03	Former VOC Omicron GRA (B.1.1.529+BA.*) first detected in Botswana/Hong Kong/South Africa	GRA	BA.2.3.17	2	Other
New York City	8419316	2022-04-10	Former VOC Omicron GRA (B.1.1.529+BA.*) first detected in Botswana/Hong Kong/South Africa	GRA	BA.2.3.17	5	Other
New York City	8419316	2022-04-17	Former VOC Omicron GRA (B.1.1.529+BA.*) first detected in Botswana/Hong Kong/South Africa	GRA	BA.2.3.17	2	Other
New York City	8419316	2022-05-01	Former VOC Omicron GRA (B.1.1.529+BA.*) first detected in Botswana/Hong Kong/South Africa	GRA	BA.2.3.17	3	Other
New York City	8419316	2022-05-08	Former VOC Omicron GRA (B.1.1.529+BA.*) first detected in Botswana/Hong Kong/South Africa	GRA	BA.2.3.17	5	Other
New York City	8419316	2022-05-15	Former VOC Omicron GRA (B.1.1.529+BA.*) first detected in Botswana/Hong Kong/South Africa	GRA	BA.2.3.17	1	Other
New York City	8419316	2022-05-22	Former VOC Omicron GRA (B.1.1.529+BA.*) first detected in Botswana/Hong Kong/South Africa	GRA	BA.2.3.17	3	Other
New York City	8419316	2022-05-29	Former VOC Omicron GRA (B.1.1.529+BA.*) first detected in Botswana/Hong Kong/South Africa	GRA	BA.2.3.17	4	Other
New York City	8419316	2022-06-05	Former VOC Omicron GRA (B.1.1.529+BA.*) first detected in Botswana/Hong Kong/South Africa	GRA	BA.2.3.17	4	Other
New York City	8419316	2022-03-06	Former VOC Omicron GRA (B.1.1.529+BA.*) first detected in Botswana/Hong Kong/South Africa	GRA	BA.2.3.2	1	Other
New York City	8419316	2022-03-27	Former VOC Omicron GRA (B.1.1.529+BA.*) first detected in Botswana/Hong Kong/South Africa	GRA	BA.2.3.2	3	Other
New York City	8419316	2022-04-03	Former VOC Omicron GRA (B.1.1.529+BA.*) first detected in Botswana/Hong Kong/South Africa	GRA	BA.2.3.2	1	Other
New York City	8419316	2022-04-10	Former VOC Omicron GRA (B.1.1.529+BA.*) first detected in Botswana/Hong Kong/South Africa	GRA	BA.2.3.2	1	Other
New York City	8419316	2022-05-01	Former VOC Omicron GRA (B.1.1.529+BA.*) first detected in Botswana/Hong Kong/South Africa	GRA	BA.2.3.2	1	Other
New York City	8419316	2022-05-08	Former VOC Omicron GRA (B.1.1.529+BA.*) first detected in Botswana/Hong Kong/South Africa	GRA	BA.2.3.2	1	Other
New York City	8419316	2022-05-15	Former VOC Omicron GRA (B.1.1.529+BA.*) first detected in Botswana/Hong Kong/South Africa	GRA	BA.2.3.2	1	Other
New York City	8419316	2022-06-05	Former VOC Omicron GRA (B.1.1.529+BA.*) first detected in Botswana/Hong Kong/South Africa	GRA	BA.2.3.2	2	Other
New York City	8419316	2022-06-19	Former VOC Omicron GRA (B.1.1.529+BA.*) first detected in Botswana/Hong Kong/South Africa	GRA	BA.2.3.2	1	Other
New York City	8419316	2022-06-26	Former VOC Omicron GRA (B.1.1.529+BA.*) first detected in Botswana/Hong Kong/South Africa	GRA	BA.2.3.2	1	Other
New York City	8419316	2022-07-10	Former VOC Omicron GRA (B.1.1.529+BA.*) first detected in Botswana/Hong Kong/South Africa	GRA	BA.2.3.2	1	Other
Western New York	1382480	2022-04-10	Former VOC Omicron GRA (B.1.1.529+BA.*) first detected in Botswana/Hong Kong/South Africa	GRA	BA.2.3.2	1	Other
Ontario CA	14570000	2022-02-13	Former VOC Omicron GRA (B.1.1.529+BA.*) first detected in Botswana/Hong Kong/South Africa	GRA	BA.2.3.2	2	Other
Ontario CA	14570000	2022-04-10	Former VOC Omicron GRA (B.1.1.529+BA.*) first detected in Botswana/Hong Kong/South Africa	GRA	BA.2.3.2	1	Other
Ontario CA	14570000	2022-04-17	Former VOC Omicron GRA (B.1.1.529+BA.*) first detected in Botswana/Hong Kong/South Africa	GRA	BA.2.3.2	1	Other
Ontario CA	14570000	2022-05-01	Former VOC Omicron GRA (B.1.1.529+BA.*) first detected in Botswana/Hong Kong/South Africa	GRA	BA.2.3.2	2	Other
Ontario CA	14570000	2022-05-08	Former VOC Omicron GRA (B.1.1.529+BA.*) first detected in Botswana/Hong Kong/South Africa	GRA	BA.2.3.2	3	Other
Ontario CA	14570000	2022-05-29	Former VOC Omicron GRA (B.1.1.529+BA.*) first detected in Botswana/Hong Kong/South Africa	GRA	BA.2.3.2	1	Other
Ontario CA	14570000	2022-06-12	Former VOC Omicron GRA (B.1.1.529+BA.*) first detected in Botswana/Hong Kong/South Africa	GRA	BA.2.3.2	2	Other
Ontario CA	14570000	2022-06-26	Former VOC Omicron GRA (B.1.1.529+BA.*) first detected in Botswana/Hong Kong/South Africa	GRA	BA.2.3.2	1	Other
Finger Lakes	1205380	2022-11-13	Former VOC Omicron GRA (B.1.1.529+BA.*) first detected in Botswana/Hong Kong/South Africa	GRA	BA.2.3.20	1	Other
Mid-Hudson	2319719	2022-09-25	Former VOC Omicron GRA (B.1.1.529+BA.*) first detected in Botswana/Hong Kong/South Africa	GRA	BA.2.3.20	1	Other
New York City	8419316	2022-09-25	Former VOC Omicron GRA (B.1.1.529+BA.*) first detected in Botswana/Hong Kong/South Africa	GRA	BA.2.3.20	1	Other
New York City	8419316	2022-10-02	Former VOC Omicron GRA (B.1.1.529+BA.*) first detected in Botswana/Hong Kong/South Africa	GRA	BA.2.3.20	2	Other
New York City	8419316	2022-10-16	Former VOC Omicron GRA (B.1.1.529+BA.*) first detected in Botswana/Hong Kong/South Africa	GRA	BA.2.3.20	3	Other
New York City	8419316	2022-10-23	Former VOC Omicron GRA (B.1.1.529+BA.*) first detected in Botswana/Hong Kong/South Africa	GRA	BA.2.3.20	4	Other
New York City	8419316	2022-10-30	Former VOC Omicron GRA (B.1.1.529+BA.*) first detected in Botswana/Hong Kong/South Africa	GRA	BA.2.3.20	6	Other
New York City	8419316	2022-11-06	Former VOC Omicron GRA (B.1.1.529+BA.*) first detected in Botswana/Hong Kong/South Africa	GRA	BA.2.3.20	1	Other
New York City	8419316	2022-11-13	Former VOC Omicron GRA (B.1.1.529+BA.*) first detected in Botswana/Hong Kong/South Africa	GRA	BA.2.3.20	4	Other
New York City	8419316	2022-11-20	Former VOC Omicron GRA (B.1.1.529+BA.*) first detected in Botswana/Hong Kong/South Africa	GRA	BA.2.3.20	2	Other
New York City	8419316	2022-11-27	Former VOC Omicron GRA (B.1.1.529+BA.*) first detected in Botswana/Hong Kong/South Africa	GRA	BA.2.3.20	1	Other
Ontario CA	14570000	2022-09-11	Former VOC Omicron GRA (B.1.1.529+BA.*) first detected in Botswana/Hong Kong/South Africa	GRA	BA.2.3.20	2	Other
Ontario CA	14570000	2022-09-25	Former VOC Omicron GRA (B.1.1.529+BA.*) first detected in Botswana/Hong Kong/South Africa	GRA	BA.2.3.20	3	Other
Ontario CA	14570000	2022-10-02	Former VOC Omicron GRA (B.1.1.529+BA.*) first detected in Botswana/Hong Kong/South Africa	GRA	BA.2.3.20	2	Other
Ontario CA	14570000	2022-10-09	Former VOC Omicron GRA (B.1.1.529+BA.*) first detected in Botswana/Hong Kong/South Africa	GRA	BA.2.3.20	2	Other
Ontario CA	14570000	2022-10-16	Former VOC Omicron GRA (B.1.1.529+BA.*) first detected in Botswana/Hong Kong/South Africa	GRA	BA.2.3.20	1	Other
Ontario CA	14570000	2022-10-30	Former VOC Omicron GRA (B.1.1.529+BA.*) first detected in Botswana/Hong Kong/South Africa	GRA	BA.2.3.20	2	Other
Ontario CA	14570000	2022-11-06	Former VOC Omicron GRA (B.1.1.529+BA.*) first detected in Botswana/Hong Kong/South Africa	GRA	BA.2.3.20	2	Other
Ontario CA	14570000	2022-11-13	Former VOC Omicron GRA (B.1.1.529+BA.*) first detected in Botswana/Hong Kong/South Africa	GRA	BA.2.3.20	3	Other
Ontario CA	14570000	2022-11-20	Former VOC Omicron GRA (B.1.1.529+BA.*) first detected in Botswana/Hong Kong/South Africa	GRA	BA.2.3.20	4	Other
Ontario CA	14570000	2022-11-27	Former VOC Omicron GRA (B.1.1.529+BA.*) first detected in Botswana/Hong Kong/South Africa	GRA	BA.2.3.20	1	Other
Ontario CA	14570000	2022-12-04	Former VOC Omicron GRA (B.1.1.529+BA.*) first detected in Botswana/Hong Kong/South Africa	GRA	BA.2.3.20	3	Other
Ontario CA	14570000	2022-12-11	Former VOC Omicron GRA (B.1.1.529+BA.*) first detected in Botswana/Hong Kong/South Africa	GRA	BA.2.3.20	7	Other
Ontario CA	14570000	2022-12-18	Former VOC Omicron GRA (B.1.1.529+BA.*) first detected in Botswana/Hong Kong/South Africa	GRA	BA.2.3.20	7	Other
Ontario CA	14570000	2022-12-25	Former VOC Omicron GRA (B.1.1.529+BA.*) first detected in Botswana/Hong Kong/South Africa	GRA	BA.2.3.20	1	Other
Finger Lakes	1205380	2022-04-17	Former VOC Omicron GRA (B.1.1.529+BA.*) first detected in Botswana/Hong Kong/South Africa	GRA	BA.2.3.4	1	Other
Finger Lakes	1205380	2022-04-24	Former VOC Omicron GRA (B.1.1.529+BA.*) first detected in Botswana/Hong Kong/South Africa	GRA	BA.2.3.4	1	Other
New York City	8419316	2022-03-20	Former VOC Omicron GRA (B.1.1.529+BA.*) first detected in Botswana/Hong Kong/South Africa	GRA	BA.2.3.4	11	Other
New York City	8419316	2022-03-27	Former VOC Omicron GRA (B.1.1.529+BA.*) first detected in Botswana/Hong Kong/South Africa	GRA	BA.2.3.4	11	Other
New York City	8419316	2022-04-03	Former VOC Omicron GRA (B.1.1.529+BA.*) first detected in Botswana/Hong Kong/South Africa	GRA	BA.2.3.4	6	Other
New York City	8419316	2022-04-10	Former VOC Omicron GRA (B.1.1.529+BA.*) first detected in Botswana/Hong Kong/South Africa	GRA	BA.2.3.4	5	Other
New York City	8419316	2022-04-17	Former VOC Omicron GRA (B.1.1.529+BA.*) first detected in Botswana/Hong Kong/South Africa	GRA	BA.2.3.4	7	Other
New York City	8419316	2022-04-24	Former VOC Omicron GRA (B.1.1.529+BA.*) first detected in Botswana/Hong Kong/South Africa	GRA	BA.2.3.4	1	Other
New York City	8419316	2022-05-01	Former VOC Omicron GRA (B.1.1.529+BA.*) first detected in Botswana/Hong Kong/South Africa	GRA	BA.2.3.4	4	Other
New York City	8419316	2022-05-08	Former VOC Omicron GRA (B.1.1.529+BA.*) first detected in Botswana/Hong Kong/South Africa	GRA	BA.2.3.4	1	Other
New York City	8419316	2022-05-15	Former VOC Omicron GRA (B.1.1.529+BA.*) first detected in Botswana/Hong Kong/South Africa	GRA	BA.2.3.4	1	Other
Western New York	1382480	2022-03-06	Former VOC Omicron GRA (B.1.1.529+BA.*) first detected in Botswana/Hong Kong/South Africa	GRA	BA.2.3.4	1	Other
Western New York	1382480	2022-03-27	Former VOC Omicron GRA (B.1.1.529+BA.*) first detected in Botswana/Hong Kong/South Africa	GRA	BA.2.3.4	1	Other
Western New York	1382480	2022-04-03	Former VOC Omicron GRA (B.1.1.529+BA.*) first detected in Botswana/Hong Kong/South Africa	GRA	BA.2.3.4	1	Other
Western New York	1382480	2022-04-10	Former VOC Omicron GRA (B.1.1.529+BA.*) first detected in Botswana/Hong Kong/South Africa	GRA	BA.2.3.4	1	Other
Western New York	1382480	2022-04-24	Former VOC Omicron GRA (B.1.1.529+BA.*) first detected in Botswana/Hong Kong/South Africa	GRA	BA.2.3.4	3	Other
Ontario CA	14570000	2022-01-23	Former VOC Omicron GRA (B.1.1.529+BA.*) first detected in Botswana/Hong Kong/South Africa	GRA	BA.2.3.4	1	Other
Ontario CA	14570000	2022-01-30	Former VOC Omicron GRA (B.1.1.529+BA.*) first detected in Botswana/Hong Kong/South Africa	GRA	BA.2.3.4	5	Other
Ontario CA	14570000	2022-02-06	Former VOC Omicron GRA (B.1.1.529+BA.*) first detected in Botswana/Hong Kong/South Africa	GRA	BA.2.3.4	1	Other
Ontario CA	14570000	2022-02-13	Former VOC Omicron GRA (B.1.1.529+BA.*) first detected in Botswana/Hong Kong/South Africa	GRA	BA.2.3.4	5	Other
Ontario CA	14570000	2022-02-20	Former VOC Omicron GRA (B.1.1.529+BA.*) first detected in Botswana/Hong Kong/South Africa	GRA	BA.2.3.4	6	Other
Ontario CA	14570000	2022-02-27	Former VOC Omicron GRA (B.1.1.529+BA.*) first detected in Botswana/Hong Kong/South Africa	GRA	BA.2.3.4	16	Other
Ontario CA	14570000	2022-03-06	Former VOC Omicron GRA (B.1.1.529+BA.*) first detected in Botswana/Hong Kong/South Africa	GRA	BA.2.3.4	24	Other
Ontario CA	14570000	2022-03-13	Former VOC Omicron GRA (B.1.1.529+BA.*) first detected in Botswana/Hong Kong/South Africa	GRA	BA.2.3.4	52	Other
Ontario CA	14570000	2022-03-20	Former VOC Omicron GRA (B.1.1.529+BA.*) first detected in Botswana/Hong Kong/South Africa	GRA	BA.2.3.4	48	Other
Ontario CA	14570000	2022-03-27	Former VOC Omicron GRA (B.1.1.529+BA.*) first detected in Botswana/Hong Kong/South Africa	GRA	BA.2.3.4	42	Other
Ontario CA	14570000	2022-04-03	Former VOC Omicron GRA (B.1.1.529+BA.*) first detected in Botswana/Hong Kong/South Africa	GRA	BA.2.3.4	53	Other
Ontario CA	14570000	2022-04-10	Former VOC Omicron GRA (B.1.1.529+BA.*) first detected in Botswana/Hong Kong/South Africa	GRA	BA.2.3.4	36	Other
Ontario CA	14570000	2022-04-17	Former VOC Omicron GRA (B.1.1.529+BA.*) first detected in Botswana/Hong Kong/South Africa	GRA	BA.2.3.4	22	Other
Ontario CA	14570000	2022-04-24	Former VOC Omicron GRA (B.1.1.529+BA.*) first detected in Botswana/Hong Kong/South Africa	GRA	BA.2.3.4	20	Other
Ontario CA	14570000	2022-05-01	Former VOC Omicron GRA (B.1.1.529+BA.*) first detected in Botswana/Hong Kong/South Africa	GRA	BA.2.3.4	10	Other
Ontario CA	14570000	2022-05-08	Former VOC Omicron GRA (B.1.1.529+BA.*) first detected in Botswana/Hong Kong/South Africa	GRA	BA.2.3.4	8	Other
Ontario CA	14570000	2022-05-15	Former VOC Omicron GRA (B.1.1.529+BA.*) first detected in Botswana/Hong Kong/South Africa	GRA	BA.2.3.4	7	Other
Ontario CA	14570000	2022-05-22	Former VOC Omicron GRA (B.1.1.529+BA.*) first detected in Botswana/Hong Kong/South Africa	GRA	BA.2.3.4	3	Other
Ontario CA	14570000	2022-05-29	Former VOC Omicron GRA (B.1.1.529+BA.*) first detected in Botswana/Hong Kong/South Africa	GRA	BA.2.3.4	1	Other
Ontario CA	14570000	2022-06-05	Former VOC Omicron GRA (B.1.1.529+BA.*) first detected in Botswana/Hong Kong/South Africa	GRA	BA.2.3.4	3	Other
Ontario CA	14570000	2022-06-12	Former VOC Omicron GRA (B.1.1.529+BA.*) first detected in Botswana/Hong Kong/South Africa	GRA	BA.2.3.4	4	Other
Ontario CA	14570000	2022-06-19	Former VOC Omicron GRA (B.1.1.529+BA.*) first detected in Botswana/Hong Kong/South Africa	GRA	BA.2.3.4	2	Other
New York City	8419316	2022-03-27	Former VOC Omicron GRA (B.1.1.529+BA.*) first detected in Botswana/Hong Kong/South Africa	GRA	BA.2.3.5	2	Other
New York City	8419316	2022-05-01	Former VOC Omicron GRA (B.1.1.529+BA.*) first detected in Botswana/Hong Kong/South Africa	GRA	BA.2.3.5	1	Other
New York City	8419316	2022-03-27	Former VOC Omicron GRA (B.1.1.529+BA.*) first detected in Botswana/Hong Kong/South Africa	GRA	BA.2.3.6	1	Other
New York City	8419316	2022-04-03	Former VOC Omicron GRA (B.1.1.529+BA.*) first detected in Botswana/Hong Kong/South Africa	GRA	BA.2.3.6	1	Other
New York City	8419316	2022-04-10	Former VOC Omicron GRA (B.1.1.529+BA.*) first detected in Botswana/Hong Kong/South Africa	GRA	BA.2.3.6	1	Other
New York City	8419316	2022-04-17	Former VOC Omicron GRA (B.1.1.529+BA.*) first detected in Botswana/Hong Kong/South Africa	GRA	BA.2.3.6	1	Other
New York City	8419316	2022-04-24	Former VOC Omicron GRA (B.1.1.529+BA.*) first detected in Botswana/Hong Kong/South Africa	GRA	BA.2.3.6	3	Other
New York City	8419316	2022-05-01	Former VOC Omicron GRA (B.1.1.529+BA.*) first detected in Botswana/Hong Kong/South Africa	GRA	BA.2.3.6	4	Other
New York City	8419316	2022-05-08	Former VOC Omicron GRA (B.1.1.529+BA.*) first detected in Botswana/Hong Kong/South Africa	GRA	BA.2.3.6	1	Other
New York City	8419316	2022-05-22	Former VOC Omicron GRA (B.1.1.529+BA.*) first detected in Botswana/Hong Kong/South Africa	GRA	BA.2.3.6	2	Other
New York City	8419316	2022-05-29	Former VOC Omicron GRA (B.1.1.529+BA.*) first detected in Botswana/Hong Kong/South Africa	GRA	BA.2.3.6	1	Other
New York City	8419316	2022-07-03	Former VOC Omicron GRA (B.1.1.529+BA.*) first detected in Botswana/Hong Kong/South Africa	GRA	BA.2.3.6	1	Other
Ontario CA	14570000	2022-02-27	Former VOC Omicron GRA (B.1.1.529+BA.*) first detected in Botswana/Hong Kong/South Africa	GRA	BA.2.3.6	2	Other
Ontario CA	14570000	2022-03-13	Former VOC Omicron GRA (B.1.1.529+BA.*) first detected in Botswana/Hong Kong/South Africa	GRA	BA.2.3.6	2	Other
Ontario CA	14570000	2022-03-20	Former VOC Omicron GRA (B.1.1.529+BA.*) first detected in Botswana/Hong Kong/South Africa	GRA	BA.2.3.6	2	Other
Ontario CA	14570000	2022-03-27	Former VOC Omicron GRA (B.1.1.529+BA.*) first detected in Botswana/Hong Kong/South Africa	GRA	BA.2.3.6	3	Other
Ontario CA	14570000	2022-04-03	Former VOC Omicron GRA (B.1.1.529+BA.*) first detected in Botswana/Hong Kong/South Africa	GRA	BA.2.3.6	6	Other
Ontario CA	14570000	2022-04-10	Former VOC Omicron GRA (B.1.1.529+BA.*) first detected in Botswana/Hong Kong/South Africa	GRA	BA.2.3.6	8	Other
Ontario CA	14570000	2022-04-17	Former VOC Omicron GRA (B.1.1.529+BA.*) first detected in Botswana/Hong Kong/South Africa	GRA	BA.2.3.6	6	Other
Ontario CA	14570000	2022-04-24	Former VOC Omicron GRA (B.1.1.529+BA.*) first detected in Botswana/Hong Kong/South Africa	GRA	BA.2.3.6	7	Other
Ontario CA	14570000	2022-05-01	Former VOC Omicron GRA (B.1.1.529+BA.*) first detected in Botswana/Hong Kong/South Africa	GRA	BA.2.3.6	1	Other
Ontario CA	14570000	2022-05-08	Former VOC Omicron GRA (B.1.1.529+BA.*) first detected in Botswana/Hong Kong/South Africa	GRA	BA.2.3.6	8	Other
Ontario CA	14570000	2022-05-22	Former VOC Omicron GRA (B.1.1.529+BA.*) first detected in Botswana/Hong Kong/South Africa	GRA	BA.2.3.6	3	Other
Ontario CA	14570000	2022-05-29	Former VOC Omicron GRA (B.1.1.529+BA.*) first detected in Botswana/Hong Kong/South Africa	GRA	BA.2.3.6	3	Other
Ontario CA	14570000	2022-06-05	Former VOC Omicron GRA (B.1.1.529+BA.*) first detected in Botswana/Hong Kong/South Africa	GRA	BA.2.3.6	4	Other
Ontario CA	14570000	2022-06-12	Former VOC Omicron GRA (B.1.1.529+BA.*) first detected in Botswana/Hong Kong/South Africa	GRA	BA.2.3.6	3	Other
Ontario CA	14570000	2022-06-19	Former VOC Omicron GRA (B.1.1.529+BA.*) first detected in Botswana/Hong Kong/South Africa	GRA	BA.2.3.6	1	Other
Ontario CA	14570000	2022-07-10	Former VOC Omicron GRA (B.1.1.529+BA.*) first detected in Botswana/Hong Kong/South Africa	GRA	BA.2.3.6	1	Other
New York City	8419316	2022-05-08	Former VOC Omicron GRA (B.1.1.529+BA.*) first detected in Botswana/Hong Kong/South Africa	GRA	BA.2.3.7	1	Other
New York City	8419316	2022-05-22	Former VOC Omicron GRA (B.1.1.529+BA.*) first detected in Botswana/Hong Kong/South Africa	GRA	BA.2.3.7	1	Other
New York City	8419316	2022-06-12	Former VOC Omicron GRA (B.1.1.529+BA.*) first detected in Botswana/Hong Kong/South Africa	GRA	BA.2.3.7	1	Other
New York City	8419316	2022-06-19	Former VOC Omicron GRA (B.1.1.529+BA.*) first detected in Botswana/Hong Kong/South Africa	GRA	BA.2.3.7	1	Other
Ontario CA	14570000	2022-05-08	Former VOC Omicron GRA (B.1.1.529+BA.*) first detected in Botswana/Hong Kong/South Africa	GRA	BA.2.3.7	1	Other
Ontario CA	14570000	2022-06-12	Former VOC Omicron GRA (B.1.1.529+BA.*) first detected in Botswana/Hong Kong/South Africa	GRA	BA.2.3.7	1	Other
Ontario CA	14570000	2022-03-27	Former VOC Omicron GRA (B.1.1.529+BA.*) first detected in Botswana/Hong Kong/South Africa	GRA	BA.2.3.8	1	Other
Ontario CA	14570000	2022-04-03	Former VOC Omicron GRA (B.1.1.529+BA.*) first detected in Botswana/Hong Kong/South Africa	GRA	BA.2.3.8	1	Other
Finger Lakes	1205380	2022-07-31	Former VOC Omicron GRA (B.1.1.529+BA.*) first detected in Botswana/Hong Kong/South Africa	GRA	BA.2.3.9	2	Other
New York City	8419316	2022-03-13	Former VOC Omicron GRA (B.1.1.529+BA.*) first detected in Botswana/Hong Kong/South Africa	GRA	BA.2.3.9	1	Other
New York City	8419316	2022-04-10	Former VOC Omicron GRA (B.1.1.529+BA.*) first detected in Botswana/Hong Kong/South Africa	GRA	BA.2.3.9	2	Other
New York City	8419316	2022-05-01	Former VOC Omicron GRA (B.1.1.529+BA.*) first detected in Botswana/Hong Kong/South Africa	GRA	BA.2.3.9	1	Other
New York City	8419316	2022-05-22	Former VOC Omicron GRA (B.1.1.529+BA.*) first detected in Botswana/Hong Kong/South Africa	GRA	BA.2.3.9	1	Other
New York City	8419316	2022-07-31	Former VOC Omicron GRA (B.1.1.529+BA.*) first detected in Botswana/Hong Kong/South Africa	GRA	BA.2.3.9	1	Other
New York City	8419316	2022-04-10	Former VOC Omicron GRA (B.1.1.529+BA.*) first detected in Botswana/Hong Kong/South Africa	GRA	BA.2.30	2	Other
New York City	8419316	2022-04-17	Former VOC Omicron GRA (B.1.1.529+BA.*) first detected in Botswana/Hong Kong/South Africa	GRA	BA.2.30	1	Other
New York City	8419316	2022-04-24	Former VOC Omicron GRA (B.1.1.529+BA.*) first detected in Botswana/Hong Kong/South Africa	GRA	BA.2.30	1	Other
New York City	8419316	2022-05-01	Former VOC Omicron GRA (B.1.1.529+BA.*) first detected in Botswana/Hong Kong/South Africa	GRA	BA.2.30	2	Other
New York City	8419316	2022-05-15	Former VOC Omicron GRA (B.1.1.529+BA.*) first detected in Botswana/Hong Kong/South Africa	GRA	BA.2.30	1	Other
New York City	8419316	2022-05-22	Former VOC Omicron GRA (B.1.1.529+BA.*) first detected in Botswana/Hong Kong/South Africa	GRA	BA.2.30	1	Other
New York City	8419316	2022-05-29	Former VOC Omicron GRA (B.1.1.529+BA.*) first detected in Botswana/Hong Kong/South Africa	GRA	BA.2.30	1	Other
New York City	8419316	2022-06-05	Former VOC Omicron GRA (B.1.1.529+BA.*) first detected in Botswana/Hong Kong/South Africa	GRA	BA.2.30	1	Other
Capital Region	1083201	2022-06-05	Former VOC Omicron GRA (B.1.1.529+BA.*) first detected in Botswana/Hong Kong/South Africa	GRA	BA.2.31	1	Other
New York City	8419316	2022-03-13	Former VOC Omicron GRA (B.1.1.529+BA.*) first detected in Botswana/Hong Kong/South Africa	GRA	BA.2.31	2	Other
New York City	8419316	2022-04-03	Former VOC Omicron GRA (B.1.1.529+BA.*) first detected in Botswana/Hong Kong/South Africa	GRA	BA.2.31	2	Other
New York City	8419316	2022-04-17	Former VOC Omicron GRA (B.1.1.529+BA.*) first detected in Botswana/Hong Kong/South Africa	GRA	BA.2.31	3	Other
New York City	8419316	2022-04-24	Former VOC Omicron GRA (B.1.1.529+BA.*) first detected in Botswana/Hong Kong/South Africa	GRA	BA.2.31	3	Other
New York City	8419316	2022-05-01	Former VOC Omicron GRA (B.1.1.529+BA.*) first detected in Botswana/Hong Kong/South Africa	GRA	BA.2.31	2	Other
New York City	8419316	2022-05-08	Former VOC Omicron GRA (B.1.1.529+BA.*) first detected in Botswana/Hong Kong/South Africa	GRA	BA.2.31	14	Other
New York City	8419316	2022-05-15	Former VOC Omicron GRA (B.1.1.529+BA.*) first detected in Botswana/Hong Kong/South Africa	GRA	BA.2.31	6	Other
New York City	8419316	2022-06-05	Former VOC Omicron GRA (B.1.1.529+BA.*) first detected in Botswana/Hong Kong/South Africa	GRA	BA.2.31	1	Other
Western New York	1382480	2022-05-29	Former VOC Omicron GRA (B.1.1.529+BA.*) first detected in Botswana/Hong Kong/South Africa	GRA	BA.2.31	1	Other
Ontario CA	14570000	2022-04-10	Former VOC Omicron GRA (B.1.1.529+BA.*) first detected in Botswana/Hong Kong/South Africa	GRA	BA.2.31	1	Other
Ontario CA	14570000	2022-04-17	Former VOC Omicron GRA (B.1.1.529+BA.*) first detected in Botswana/Hong Kong/South Africa	GRA	BA.2.31	1	Other
Ontario CA	14570000	2022-04-24	Former VOC Omicron GRA (B.1.1.529+BA.*) first detected in Botswana/Hong Kong/South Africa	GRA	BA.2.31	1	Other
Ontario CA	14570000	2022-06-05	Former VOC Omicron GRA (B.1.1.529+BA.*) first detected in Botswana/Hong Kong/South Africa	GRA	BA.2.31	1	Other
Ontario CA	14570000	2022-06-12	Former VOC Omicron GRA (B.1.1.529+BA.*) first detected in Botswana/Hong Kong/South Africa	GRA	BA.2.31	2	Other
Ontario CA	14570000	2022-06-19	Former VOC Omicron GRA (B.1.1.529+BA.*) first detected in Botswana/Hong Kong/South Africa	GRA	BA.2.31	1	Other
Ontario CA	14570000	2022-06-26	Former VOC Omicron GRA (B.1.1.529+BA.*) first detected in Botswana/Hong Kong/South Africa	GRA	BA.2.31	2	Other
Ontario CA	14570000	2022-07-03	Former VOC Omicron GRA (B.1.1.529+BA.*) first detected in Botswana/Hong Kong/South Africa	GRA	BA.2.31	2	Other
Ontario CA	14570000	2022-07-10	Former VOC Omicron GRA (B.1.1.529+BA.*) first detected in Botswana/Hong Kong/South Africa	GRA	BA.2.31	1	Other
New York City	8419316	2022-05-08	Former VOC Omicron GRA (B.1.1.529+BA.*) first detected in Botswana/Hong Kong/South Africa	GRA	BA.2.31.1	1	Other
New York City	8419316	2022-07-03	Former VOC Omicron GRA (B.1.1.529+BA.*) first detected in Botswana/Hong Kong/South Africa	GRA	BA.2.31.1	1	Other
Ontario CA	14570000	2022-04-24	Former VOC Omicron GRA (B.1.1.529+BA.*) first detected in Botswana/Hong Kong/South Africa	GRA	BA.2.31.1	1	Other
Ontario CA	14570000	2022-06-26	Former VOC Omicron GRA (B.1.1.529+BA.*) first detected in Botswana/Hong Kong/South Africa	GRA	BA.2.31.1	1	Other
New York City	8419316	2022-03-06	Former VOC Omicron GRA (B.1.1.529+BA.*) first detected in Botswana/Hong Kong/South Africa	GRA	BA.2.32	1	Other
New York City	8419316	2022-03-13	Former VOC Omicron GRA (B.1.1.529+BA.*) first detected in Botswana/Hong Kong/South Africa	GRA	BA.2.32	2	Other
New York City	8419316	2022-03-20	Former VOC Omicron GRA (B.1.1.529+BA.*) first detected in Botswana/Hong Kong/South Africa	GRA	BA.2.32	1	Other
New York City	8419316	2022-04-03	Former VOC Omicron GRA (B.1.1.529+BA.*) first detected in Botswana/Hong Kong/South Africa	GRA	BA.2.32	1	Other
New York City	8419316	2022-04-10	Former VOC Omicron GRA (B.1.1.529+BA.*) first detected in Botswana/Hong Kong/South Africa	GRA	BA.2.32	5	Other
New York City	8419316	2022-04-17	Former VOC Omicron GRA (B.1.1.529+BA.*) first detected in Botswana/Hong Kong/South Africa	GRA	BA.2.32	7	Other
New York City	8419316	2022-04-24	Former VOC Omicron GRA (B.1.1.529+BA.*) first detected in Botswana/Hong Kong/South Africa	GRA	BA.2.32	4	Other
New York City	8419316	2022-05-01	Former VOC Omicron GRA (B.1.1.529+BA.*) first detected in Botswana/Hong Kong/South Africa	GRA	BA.2.32	6	Other
New York City	8419316	2022-05-08	Former VOC Omicron GRA (B.1.1.529+BA.*) first detected in Botswana/Hong Kong/South Africa	GRA	BA.2.32	2	Other
New York City	8419316	2022-05-15	Former VOC Omicron GRA (B.1.1.529+BA.*) first detected in Botswana/Hong Kong/South Africa	GRA	BA.2.32	1	Other
New York City	8419316	2022-05-22	Former VOC Omicron GRA (B.1.1.529+BA.*) first detected in Botswana/Hong Kong/South Africa	GRA	BA.2.32	1	Other
Ontario CA	14570000	2022-02-20	Former VOC Omicron GRA (B.1.1.529+BA.*) first detected in Botswana/Hong Kong/South Africa	GRA	BA.2.32	1	Other
Ontario CA	14570000	2022-05-15	Former VOC Omicron GRA (B.1.1.529+BA.*) first detected in Botswana/Hong Kong/South Africa	GRA	BA.2.32	1	Other
New York City	8419316	2022-03-20	Former VOC Omicron GRA (B.1.1.529+BA.*) first detected in Botswana/Hong Kong/South Africa	GRA	BA.2.33	1	Other
New York City	8419316	2022-04-24	Former VOC Omicron GRA (B.1.1.529+BA.*) first detected in Botswana/Hong Kong/South Africa	GRA	BA.2.33	2	Other
New York City	8419316	2022-06-26	Former VOC Omicron GRA (B.1.1.529+BA.*) first detected in Botswana/Hong Kong/South Africa	GRA	BA.2.33	1	Other
Ontario CA	14570000	2022-03-20	Former VOC Omicron GRA (B.1.1.529+BA.*) first detected in Botswana/Hong Kong/South Africa	GRA	BA.2.33	1	Other
New York City	8419316	2022-05-22	Former VOC Omicron GRA (B.1.1.529+BA.*) first detected in Botswana/Hong Kong/South Africa	GRA	BA.2.34	1	Other
Ontario CA	14570000	2022-03-27	Former VOC Omicron GRA (B.1.1.529+BA.*) first detected in Botswana/Hong Kong/South Africa	GRA	BA.2.34	1	Other
New York City	8419316	2022-05-08	Former VOC Omicron GRA (B.1.1.529+BA.*) first detected in Botswana/Hong Kong/South Africa	GRA	BA.2.35	1	Other
New York City	8419316	2022-05-15	Former VOC Omicron GRA (B.1.1.529+BA.*) first detected in Botswana/Hong Kong/South Africa	GRA	BA.2.35	1	Other
New York City	8419316	2022-05-22	Former VOC Omicron GRA (B.1.1.529+BA.*) first detected in Botswana/Hong Kong/South Africa	GRA	BA.2.35	1	Other
New York City	8419316	2022-07-10	Former VOC Omicron GRA (B.1.1.529+BA.*) first detected in Botswana/Hong Kong/South Africa	GRA	BA.2.35	1	Other
Ontario CA	14570000	2022-04-17	Former VOC Omicron GRA (B.1.1.529+BA.*) first detected in Botswana/Hong Kong/South Africa	GRA	BA.2.35	1	Other
Ontario CA	14570000	2022-04-24	Former VOC Omicron GRA (B.1.1.529+BA.*) first detected in Botswana/Hong Kong/South Africa	GRA	BA.2.35	1	Other
Ontario CA	14570000	2022-06-19	Former VOC Omicron GRA (B.1.1.529+BA.*) first detected in Botswana/Hong Kong/South Africa	GRA	BA.2.35	1	Other
New York City	8419316	2022-03-13	Former VOC Omicron GRA (B.1.1.529+BA.*) first detected in Botswana/Hong Kong/South Africa	GRA	BA.2.36	3	Other
New York City	8419316	2022-03-20	Former VOC Omicron GRA (B.1.1.529+BA.*) first detected in Botswana/Hong Kong/South Africa	GRA	BA.2.36	1	Other
New York City	8419316	2022-03-27	Former VOC Omicron GRA (B.1.1.529+BA.*) first detected in Botswana/Hong Kong/South Africa	GRA	BA.2.36	1	Other
New York City	8419316	2022-04-03	Former VOC Omicron GRA (B.1.1.529+BA.*) first detected in Botswana/Hong Kong/South Africa	GRA	BA.2.36	2	Other
New York City	8419316	2022-04-10	Former VOC Omicron GRA (B.1.1.529+BA.*) first detected in Botswana/Hong Kong/South Africa	GRA	BA.2.36	3	Other
New York City	8419316	2022-04-17	Former VOC Omicron GRA (B.1.1.529+BA.*) first detected in Botswana/Hong Kong/South Africa	GRA	BA.2.36	5	Other
New York City	8419316	2022-04-24	Former VOC Omicron GRA (B.1.1.529+BA.*) first detected in Botswana/Hong Kong/South Africa	GRA	BA.2.36	9	Other
New York City	8419316	2022-05-01	Former VOC Omicron GRA (B.1.1.529+BA.*) first detected in Botswana/Hong Kong/South Africa	GRA	BA.2.36	13	Other
New York City	8419316	2022-05-08	Former VOC Omicron GRA (B.1.1.529+BA.*) first detected in Botswana/Hong Kong/South Africa	GRA	BA.2.36	9	Other
New York City	8419316	2022-05-15	Former VOC Omicron GRA (B.1.1.529+BA.*) first detected in Botswana/Hong Kong/South Africa	GRA	BA.2.36	7	Other
New York City	8419316	2022-05-22	Former VOC Omicron GRA (B.1.1.529+BA.*) first detected in Botswana/Hong Kong/South Africa	GRA	BA.2.36	2	Other
New York City	8419316	2022-05-29	Former VOC Omicron GRA (B.1.1.529+BA.*) first detected in Botswana/Hong Kong/South Africa	GRA	BA.2.36	1	Other
New York City	8419316	2022-06-05	Former VOC Omicron GRA (B.1.1.529+BA.*) first detected in Botswana/Hong Kong/South Africa	GRA	BA.2.36	13	Other
New York City	8419316	2022-06-12	Former VOC Omicron GRA (B.1.1.529+BA.*) first detected in Botswana/Hong Kong/South Africa	GRA	BA.2.36	6	Other
New York City	8419316	2022-06-19	Former VOC Omicron GRA (B.1.1.529+BA.*) first detected in Botswana/Hong Kong/South Africa	GRA	BA.2.36	2	Other
New York City	8419316	2022-06-26	Former VOC Omicron GRA (B.1.1.529+BA.*) first detected in Botswana/Hong Kong/South Africa	GRA	BA.2.36	2	Other
New York City	8419316	2022-07-03	Former VOC Omicron GRA (B.1.1.529+BA.*) first detected in Botswana/Hong Kong/South Africa	GRA	BA.2.36	3	Other
New York City	8419316	2022-07-24	Former VOC Omicron GRA (B.1.1.529+BA.*) first detected in Botswana/Hong Kong/South Africa	GRA	BA.2.36	2	Other
Ontario CA	14570000	2022-03-27	Former VOC Omicron GRA (B.1.1.529+BA.*) first detected in Botswana/Hong Kong/South Africa	GRA	BA.2.36	1	Other
Ontario CA	14570000	2022-05-01	Former VOC Omicron GRA (B.1.1.529+BA.*) first detected in Botswana/Hong Kong/South Africa	GRA	BA.2.36	1	Other
Ontario CA	14570000	2022-05-15	Former VOC Omicron GRA (B.1.1.529+BA.*) first detected in Botswana/Hong Kong/South Africa	GRA	BA.2.36	1	Other
Ontario CA	14570000	2022-05-22	Former VOC Omicron GRA (B.1.1.529+BA.*) first detected in Botswana/Hong Kong/South Africa	GRA	BA.2.36	1	Other
Ontario CA	14570000	2022-05-29	Former VOC Omicron GRA (B.1.1.529+BA.*) first detected in Botswana/Hong Kong/South Africa	GRA	BA.2.36	1	Other
Ontario CA	14570000	2022-06-26	Former VOC Omicron GRA (B.1.1.529+BA.*) first detected in Botswana/Hong Kong/South Africa	GRA	BA.2.36	2	Other
Ontario CA	14570000	2022-07-24	Former VOC Omicron GRA (B.1.1.529+BA.*) first detected in Botswana/Hong Kong/South Africa	GRA	BA.2.36	1	Other
Ontario CA	14570000	2022-07-31	Former VOC Omicron GRA (B.1.1.529+BA.*) first detected in Botswana/Hong Kong/South Africa	GRA	BA.2.36	1	Other
Capital Region	1083201	2022-03-13	Former VOC Omicron GRA (B.1.1.529+BA.*) first detected in Botswana/Hong Kong/South Africa	GRA	BA.2.37	1	Other
Finger Lakes	1205380	2022-05-15	Former VOC Omicron GRA (B.1.1.529+BA.*) first detected in Botswana/Hong Kong/South Africa	GRA	BA.2.37	1	Other
New York City	8419316	2022-01-09	Former VOC Omicron GRA (B.1.1.529+BA.*) first detected in Botswana/Hong Kong/South Africa	GRA	BA.2.37	1	Other
New York City	8419316	2022-02-27	Former VOC Omicron GRA (B.1.1.529+BA.*) first detected in Botswana/Hong Kong/South Africa	GRA	BA.2.37	1	Other
New York City	8419316	2022-03-06	Former VOC Omicron GRA (B.1.1.529+BA.*) first detected in Botswana/Hong Kong/South Africa	GRA	BA.2.37	2	Other
New York City	8419316	2022-03-13	Former VOC Omicron GRA (B.1.1.529+BA.*) first detected in Botswana/Hong Kong/South Africa	GRA	BA.2.37	5	Other
New York City	8419316	2022-03-20	Former VOC Omicron GRA (B.1.1.529+BA.*) first detected in Botswana/Hong Kong/South Africa	GRA	BA.2.37	14	Other
New York City	8419316	2022-03-27	Former VOC Omicron GRA (B.1.1.529+BA.*) first detected in Botswana/Hong Kong/South Africa	GRA	BA.2.37	13	Other
New York City	8419316	2022-04-03	Former VOC Omicron GRA (B.1.1.529+BA.*) first detected in Botswana/Hong Kong/South Africa	GRA	BA.2.37	13	Other
New York City	8419316	2022-04-10	Former VOC Omicron GRA (B.1.1.529+BA.*) first detected in Botswana/Hong Kong/South Africa	GRA	BA.2.37	10	Other
New York City	8419316	2022-04-17	Former VOC Omicron GRA (B.1.1.529+BA.*) first detected in Botswana/Hong Kong/South Africa	GRA	BA.2.37	5	Other
New York City	8419316	2022-04-24	Former VOC Omicron GRA (B.1.1.529+BA.*) first detected in Botswana/Hong Kong/South Africa	GRA	BA.2.37	15	Other
New York City	8419316	2022-05-01	Former VOC Omicron GRA (B.1.1.529+BA.*) first detected in Botswana/Hong Kong/South Africa	GR	BA.2.37	1	Other
New York City	8419316	2022-05-01	Former VOC Omicron GRA (B.1.1.529+BA.*) first detected in Botswana/Hong Kong/South Africa	GRA	BA.2.37	10	Other
New York City	8419316	2022-05-08	Former VOC Omicron GRA (B.1.1.529+BA.*) first detected in Botswana/Hong Kong/South Africa	GRA	BA.2.37	6	Other
New York City	8419316	2022-05-15	Former VOC Omicron GRA (B.1.1.529+BA.*) first detected in Botswana/Hong Kong/South Africa	GRA	BA.2.37	9	Other
New York City	8419316	2022-05-22	Former VOC Omicron GRA (B.1.1.529+BA.*) first detected in Botswana/Hong Kong/South Africa	GRA	BA.2.37	4	Other
New York City	8419316	2022-05-29	Former VOC Omicron GRA (B.1.1.529+BA.*) first detected in Botswana/Hong Kong/South Africa	GRA	BA.2.37	2	Other
New York City	8419316	2022-06-12	Former VOC Omicron GRA (B.1.1.529+BA.*) first detected in Botswana/Hong Kong/South Africa	GRA	BA.2.37	1	Other
Western New York	1382480	2022-05-15	Former VOC Omicron GRA (B.1.1.529+BA.*) first detected in Botswana/Hong Kong/South Africa	GRA	BA.2.37	1	Other
Ontario CA	14570000	2022-01-09	Former VOC Omicron GRA (B.1.1.529+BA.*) first detected in Botswana/Hong Kong/South Africa	GRA	BA.2.37	4	Other
Ontario CA	14570000	2022-01-16	Former VOC Omicron GRA (B.1.1.529+BA.*) first detected in Botswana/Hong Kong/South Africa	GRA	BA.2.37	1	Other
Ontario CA	14570000	2022-01-30	Former VOC Omicron GRA (B.1.1.529+BA.*) first detected in Botswana/Hong Kong/South Africa	GRA	BA.2.37	2	Other
Ontario CA	14570000	2022-02-06	Former VOC Omicron GRA (B.1.1.529+BA.*) first detected in Botswana/Hong Kong/South Africa	GRA	BA.2.37	2	Other
Ontario CA	14570000	2022-02-13	Former VOC Omicron GRA (B.1.1.529+BA.*) first detected in Botswana/Hong Kong/South Africa	GRA	BA.2.37	2	Other
Ontario CA	14570000	2022-02-20	Former VOC Omicron GRA (B.1.1.529+BA.*) first detected in Botswana/Hong Kong/South Africa	GRA	BA.2.37	1	Other
Ontario CA	14570000	2022-03-13	Former VOC Omicron GRA (B.1.1.529+BA.*) first detected in Botswana/Hong Kong/South Africa	GRA	BA.2.37	5	Other
Ontario CA	14570000	2022-03-20	Former VOC Omicron GRA (B.1.1.529+BA.*) first detected in Botswana/Hong Kong/South Africa	GRA	BA.2.37	2	Other
Ontario CA	14570000	2022-03-27	Former VOC Omicron GRA (B.1.1.529+BA.*) first detected in Botswana/Hong Kong/South Africa	GRA	BA.2.37	4	Other
Ontario CA	14570000	2022-04-03	Former VOC Omicron GRA (B.1.1.529+BA.*) first detected in Botswana/Hong Kong/South Africa	GRA	BA.2.37	3	Other
Ontario CA	14570000	2022-04-10	Former VOC Omicron GRA (B.1.1.529+BA.*) first detected in Botswana/Hong Kong/South Africa	GRA	BA.2.37	1	Other
Ontario CA	14570000	2022-04-24	Former VOC Omicron GRA (B.1.1.529+BA.*) first detected in Botswana/Hong Kong/South Africa	GRA	BA.2.37	4	Other
Ontario CA	14570000	2022-05-08	Former VOC Omicron GRA (B.1.1.529+BA.*) first detected in Botswana/Hong Kong/South Africa	GRA	BA.2.37	3	Other
Ontario CA	14570000	2022-05-15	Former VOC Omicron GRA (B.1.1.529+BA.*) first detected in Botswana/Hong Kong/South Africa	GRA	BA.2.37	1	Other
Ontario CA	14570000	2022-05-22	Former VOC Omicron GRA (B.1.1.529+BA.*) first detected in Botswana/Hong Kong/South Africa	GRA	BA.2.37	3	Other
Ontario CA	14570000	2022-06-05	Former VOC Omicron GRA (B.1.1.529+BA.*) first detected in Botswana/Hong Kong/South Africa	GRA	BA.2.37	1	Other
Mid-Hudson	2319719	2022-07-10	Former VOC Omicron GRA (B.1.1.529+BA.*) first detected in Botswana/Hong Kong/South Africa	GRA	BA.2.38	1	Other
New York City	8419316	2022-04-24	Former VOC Omicron GRA (B.1.1.529+BA.*) first detected in Botswana/Hong Kong/South Africa	GRA	BA.2.38	3	Other
New York City	8419316	2022-05-08	Former VOC Omicron GRA (B.1.1.529+BA.*) first detected in Botswana/Hong Kong/South Africa	GRA	BA.2.38	3	Other
New York City	8419316	2022-05-15	Former VOC Omicron GRA (B.1.1.529+BA.*) first detected in Botswana/Hong Kong/South Africa	GRA	BA.2.38	2	Other
New York City	8419316	2022-05-22	Former VOC Omicron GRA (B.1.1.529+BA.*) first detected in Botswana/Hong Kong/South Africa	GRA	BA.2.38	7	Other
New York City	8419316	2022-05-29	Former VOC Omicron GRA (B.1.1.529+BA.*) first detected in Botswana/Hong Kong/South Africa	GRA	BA.2.38	2	Other
New York City	8419316	2022-06-05	Former VOC Omicron GRA (B.1.1.529+BA.*) first detected in Botswana/Hong Kong/South Africa	GRA	BA.2.38	1	Other
New York City	8419316	2022-06-12	Former VOC Omicron GRA (B.1.1.529+BA.*) first detected in Botswana/Hong Kong/South Africa	GRA	BA.2.38	7	Other
New York City	8419316	2022-06-19	Former VOC Omicron GRA (B.1.1.529+BA.*) first detected in Botswana/Hong Kong/South Africa	GRA	BA.2.38	2	Other
New York City	8419316	2022-06-26	Former VOC Omicron GRA (B.1.1.529+BA.*) first detected in Botswana/Hong Kong/South Africa	GRA	BA.2.38	3	Other
New York City	8419316	2022-07-03	Former VOC Omicron GRA (B.1.1.529+BA.*) first detected in Botswana/Hong Kong/South Africa	GRA	BA.2.38	2	Other
New York City	8419316	2022-07-10	Former VOC Omicron GRA (B.1.1.529+BA.*) first detected in Botswana/Hong Kong/South Africa	GRA	BA.2.38	4	Other
New York City	8419316	2022-07-17	Former VOC Omicron GRA (B.1.1.529+BA.*) first detected in Botswana/Hong Kong/South Africa	GRA	BA.2.38	2	Other
New York City	8419316	2022-07-24	Former VOC Omicron GRA (B.1.1.529+BA.*) first detected in Botswana/Hong Kong/South Africa	GRA	BA.2.38	2	Other
Ontario CA	14570000	2022-02-13	Former VOC Omicron GRA (B.1.1.529+BA.*) first detected in Botswana/Hong Kong/South Africa	GRA	BA.2.38	1	Other
Ontario CA	14570000	2022-02-20	Former VOC Omicron GRA (B.1.1.529+BA.*) first detected in Botswana/Hong Kong/South Africa	GRA	BA.2.38	2	Other
Ontario CA	14570000	2022-03-13	Former VOC Omicron GRA (B.1.1.529+BA.*) first detected in Botswana/Hong Kong/South Africa	GRA	BA.2.38	2	Other
Ontario CA	14570000	2022-03-20	Former VOC Omicron GRA (B.1.1.529+BA.*) first detected in Botswana/Hong Kong/South Africa	GRA	BA.2.38	3	Other
Ontario CA	14570000	2022-04-10	Former VOC Omicron GRA (B.1.1.529+BA.*) first detected in Botswana/Hong Kong/South Africa	GRA	BA.2.38	2	Other
Ontario CA	14570000	2022-05-01	Former VOC Omicron GRA (B.1.1.529+BA.*) first detected in Botswana/Hong Kong/South Africa	GRA	BA.2.38	1	Other
Ontario CA	14570000	2022-05-08	Former VOC Omicron GRA (B.1.1.529+BA.*) first detected in Botswana/Hong Kong/South Africa	GRA	BA.2.38	3	Other
Ontario CA	14570000	2022-05-15	Former VOC Omicron GRA (B.1.1.529+BA.*) first detected in Botswana/Hong Kong/South Africa	GRA	BA.2.38	2	Other
Ontario CA	14570000	2022-05-22	Former VOC Omicron GRA (B.1.1.529+BA.*) first detected in Botswana/Hong Kong/South Africa	GRA	BA.2.38	2	Other
Ontario CA	14570000	2022-06-05	Former VOC Omicron GRA (B.1.1.529+BA.*) first detected in Botswana/Hong Kong/South Africa	GRA	BA.2.38	3	Other
Ontario CA	14570000	2022-06-12	Former VOC Omicron GRA (B.1.1.529+BA.*) first detected in Botswana/Hong Kong/South Africa	GRA	BA.2.38	7	Other
Ontario CA	14570000	2022-06-19	Former VOC Omicron GRA (B.1.1.529+BA.*) first detected in Botswana/Hong Kong/South Africa	GRA	BA.2.38	8	Other
Ontario CA	14570000	2022-06-26	Former VOC Omicron GRA (B.1.1.529+BA.*) first detected in Botswana/Hong Kong/South Africa	GRA	BA.2.38	5	Other
Ontario CA	14570000	2022-07-03	Former VOC Omicron GRA (B.1.1.529+BA.*) first detected in Botswana/Hong Kong/South Africa	GRA	BA.2.38	4	Other
Ontario CA	14570000	2022-07-10	Former VOC Omicron GRA (B.1.1.529+BA.*) first detected in Botswana/Hong Kong/South Africa	GRA	BA.2.38	6	Other
Ontario CA	14570000	2022-07-17	Former VOC Omicron GRA (B.1.1.529+BA.*) first detected in Botswana/Hong Kong/South Africa	GRA	BA.2.38	5	Other
Ontario CA	14570000	2022-07-24	Former VOC Omicron GRA (B.1.1.529+BA.*) first detected in Botswana/Hong Kong/South Africa	GRA	BA.2.38	1	Other
New York City	8419316	2022-07-10	Former VOC Omicron GRA (B.1.1.529+BA.*) first detected in Botswana/Hong Kong/South Africa	GRA	BA.2.38.1	1	Other
Ontario CA	14570000	2022-07-03	Former VOC Omicron GRA (B.1.1.529+BA.*) first detected in Botswana/Hong Kong/South Africa	GRA	BA.2.38.1	1	Other
New York City	8419316	2022-07-24	Former VOC Omicron GRA (B.1.1.529+BA.*) first detected in Botswana/Hong Kong/South Africa	GRA	BA.2.38.2	1	Other
Ontario CA	14570000	2022-06-19	Former VOC Omicron GRA (B.1.1.529+BA.*) first detected in Botswana/Hong Kong/South Africa	GRA	BA.2.38.2	1	Other
Ontario CA	14570000	2022-09-25	Former VOC Omicron GRA (B.1.1.529+BA.*) first detected in Botswana/Hong Kong/South Africa	GRA	BA.2.38.2	1	Other
New York City	8419316	2022-04-03	Former VOC Omicron GRA (B.1.1.529+BA.*) first detected in Botswana/Hong Kong/South Africa	GRA	BA.2.39	1	Other
New York City	8419316	2022-03-06	Former VOC Omicron GRA (B.1.1.529+BA.*) first detected in Botswana/Hong Kong/South Africa	GRA	BA.2.4	1	Other
New York City	8419316	2022-03-13	Former VOC Omicron GRA (B.1.1.529+BA.*) first detected in Botswana/Hong Kong/South Africa	GRA	BA.2.4	3	Other
New York City	8419316	2022-03-20	Former VOC Omicron GRA (B.1.1.529+BA.*) first detected in Botswana/Hong Kong/South Africa	GRA	BA.2.4	2	Other
New York City	8419316	2022-03-27	Former VOC Omicron GRA (B.1.1.529+BA.*) first detected in Botswana/Hong Kong/South Africa	GRA	BA.2.4	1	Other
New York City	8419316	2022-04-03	Former VOC Omicron GRA (B.1.1.529+BA.*) first detected in Botswana/Hong Kong/South Africa	GRA	BA.2.4	1	Other
New York City	8419316	2022-04-10	Former VOC Omicron GRA (B.1.1.529+BA.*) first detected in Botswana/Hong Kong/South Africa	GRA	BA.2.4	2	Other
New York City	8419316	2022-04-17	Former VOC Omicron GRA (B.1.1.529+BA.*) first detected in Botswana/Hong Kong/South Africa	GRA	BA.2.4	1	Other
New York City	8419316	2022-05-08	Former VOC Omicron GRA (B.1.1.529+BA.*) first detected in Botswana/Hong Kong/South Africa	GRA	BA.2.4	1	Other
New York City	8419316	2022-05-15	Former VOC Omicron GRA (B.1.1.529+BA.*) first detected in Botswana/Hong Kong/South Africa	GRA	BA.2.4	1	Other
New York City	8419316	2022-05-22	Former VOC Omicron GRA (B.1.1.529+BA.*) first detected in Botswana/Hong Kong/South Africa	GRA	BA.2.4	1	Other
New York City	8419316	2022-06-12	Former VOC Omicron GRA (B.1.1.529+BA.*) first detected in Botswana/Hong Kong/South Africa	GRA	BA.2.40	1	Other
Capital Region	1083201	2022-07-03	Former VOC Omicron GRA (B.1.1.529+BA.*) first detected in Botswana/Hong Kong/South Africa	GRA	BA.2.40.1	1	Other
Capital Region	1083201	2022-07-10	Former VOC Omicron GRA (B.1.1.529+BA.*) first detected in Botswana/Hong Kong/South Africa	GRA	BA.2.40.1	1	Other
Finger Lakes	1205380	2022-05-22	Former VOC Omicron GRA (B.1.1.529+BA.*) first detected in Botswana/Hong Kong/South Africa	GRA	BA.2.40.1	1	Other
Mid-Hudson	2319719	2022-05-29	Former VOC Omicron GRA (B.1.1.529+BA.*) first detected in Botswana/Hong Kong/South Africa	GRA	BA.2.40.1	1	Other
New York City	8419316	2022-03-20	Former VOC Omicron GRA (B.1.1.529+BA.*) first detected in Botswana/Hong Kong/South Africa	GRA	BA.2.40.1	1	Other
New York City	8419316	2022-03-27	Former VOC Omicron GRA (B.1.1.529+BA.*) first detected in Botswana/Hong Kong/South Africa	GRA	BA.2.40.1	3	Other
New York City	8419316	2022-04-03	Former VOC Omicron GRA (B.1.1.529+BA.*) first detected in Botswana/Hong Kong/South Africa	GRA	BA.2.40.1	5	Other
New York City	8419316	2022-04-10	Former VOC Omicron GRA (B.1.1.529+BA.*) first detected in Botswana/Hong Kong/South Africa	GRA	BA.2.40.1	5	Other
New York City	8419316	2022-04-17	Former VOC Omicron GRA (B.1.1.529+BA.*) first detected in Botswana/Hong Kong/South Africa	GRA	BA.2.40.1	7	Other
New York City	8419316	2022-04-24	Former VOC Omicron GRA (B.1.1.529+BA.*) first detected in Botswana/Hong Kong/South Africa	GRA	BA.2.40.1	10	Other
New York City	8419316	2022-05-01	Former VOC Omicron GRA (B.1.1.529+BA.*) first detected in Botswana/Hong Kong/South Africa	GRA	BA.2.40.1	7	Other
New York City	8419316	2022-05-08	Former VOC Omicron GRA (B.1.1.529+BA.*) first detected in Botswana/Hong Kong/South Africa	GRA	BA.2.40.1	7	Other
New York City	8419316	2022-05-15	Former VOC Omicron GRA (B.1.1.529+BA.*) first detected in Botswana/Hong Kong/South Africa	GRA	BA.2.40.1	6	Other
New York City	8419316	2022-05-22	Former VOC Omicron GRA (B.1.1.529+BA.*) first detected in Botswana/Hong Kong/South Africa	GRA	BA.2.40.1	2	Other
New York City	8419316	2022-05-29	Former VOC Omicron GRA (B.1.1.529+BA.*) first detected in Botswana/Hong Kong/South Africa	GRA	BA.2.40.1	8	Other
New York City	8419316	2022-06-05	Former VOC Omicron GRA (B.1.1.529+BA.*) first detected in Botswana/Hong Kong/South Africa	GRA	BA.2.40.1	6	Other
New York City	8419316	2022-06-12	Former VOC Omicron GRA (B.1.1.529+BA.*) first detected in Botswana/Hong Kong/South Africa	GRA	BA.2.40.1	6	Other
New York City	8419316	2022-06-26	Former VOC Omicron GRA (B.1.1.529+BA.*) first detected in Botswana/Hong Kong/South Africa	GRA	BA.2.40.1	1	Other
New York City	8419316	2022-07-03	Former VOC Omicron GRA (B.1.1.529+BA.*) first detected in Botswana/Hong Kong/South Africa	GRA	BA.2.40.1	5	Other
New York City	8419316	2022-07-17	Former VOC Omicron GRA (B.1.1.529+BA.*) first detected in Botswana/Hong Kong/South Africa	GRA	BA.2.40.1	2	Other
Ontario CA	14570000	2022-04-24	Former VOC Omicron GRA (B.1.1.529+BA.*) first detected in Botswana/Hong Kong/South Africa	GRA	BA.2.40.1	1	Other
Ontario CA	14570000	2022-05-15	Former VOC Omicron GRA (B.1.1.529+BA.*) first detected in Botswana/Hong Kong/South Africa	GRA	BA.2.40.1	1	Other
Ontario CA	14570000	2022-05-29	Former VOC Omicron GRA (B.1.1.529+BA.*) first detected in Botswana/Hong Kong/South Africa	GRA	BA.2.40.1	1	Other
Ontario CA	14570000	2022-06-05	Former VOC Omicron GRA (B.1.1.529+BA.*) first detected in Botswana/Hong Kong/South Africa	GRA	BA.2.40.1	2	Other
Ontario CA	14570000	2022-06-12	Former VOC Omicron GRA (B.1.1.529+BA.*) first detected in Botswana/Hong Kong/South Africa	GRA	BA.2.40.1	3	Other
Ontario CA	14570000	2022-06-19	Former VOC Omicron GRA (B.1.1.529+BA.*) first detected in Botswana/Hong Kong/South Africa	GRA	BA.2.40.1	1	Other
Ontario CA	14570000	2022-06-26	Former VOC Omicron GRA (B.1.1.529+BA.*) first detected in Botswana/Hong Kong/South Africa	GRA	BA.2.40.1	4	Other
Ontario CA	14570000	2022-07-03	Former VOC Omicron GRA (B.1.1.529+BA.*) first detected in Botswana/Hong Kong/South Africa	GRA	BA.2.40.1	2	Other
New York City	8419316	2022-04-10	Former VOC Omicron GRA (B.1.1.529+BA.*) first detected in Botswana/Hong Kong/South Africa	GRA	BA.2.41	2	Other
New York City	8419316	2022-05-08	Former VOC Omicron GRA (B.1.1.529+BA.*) first detected in Botswana/Hong Kong/South Africa	GRA	BA.2.41	2	Other
New York City	8419316	2022-05-15	Former VOC Omicron GRA (B.1.1.529+BA.*) first detected in Botswana/Hong Kong/South Africa	GRA	BA.2.41	3	Other
New York City	8419316	2022-05-22	Former VOC Omicron GRA (B.1.1.529+BA.*) first detected in Botswana/Hong Kong/South Africa	GRA	BA.2.41	4	Other
New York City	8419316	2022-05-29	Former VOC Omicron GRA (B.1.1.529+BA.*) first detected in Botswana/Hong Kong/South Africa	GRA	BA.2.41	1	Other
New York City	8419316	2022-06-05	Former VOC Omicron GRA (B.1.1.529+BA.*) first detected in Botswana/Hong Kong/South Africa	GRA	BA.2.41	3	Other
New York City	8419316	2022-06-12	Former VOC Omicron GRA (B.1.1.529+BA.*) first detected in Botswana/Hong Kong/South Africa	GRA	BA.2.41	1	Other
Ontario CA	14570000	2022-05-15	Former VOC Omicron GRA (B.1.1.529+BA.*) first detected in Botswana/Hong Kong/South Africa	GRA	BA.2.41	1	Other
Ontario CA	14570000	2022-06-05	Former VOC Omicron GRA (B.1.1.529+BA.*) first detected in Botswana/Hong Kong/South Africa	GRA	BA.2.41	1	Other
Ontario CA	14570000	2022-06-12	Former VOC Omicron GRA (B.1.1.529+BA.*) first detected in Botswana/Hong Kong/South Africa	GRA	BA.2.41	1	Other
Ontario CA	14570000	2022-06-26	Former VOC Omicron GRA (B.1.1.529+BA.*) first detected in Botswana/Hong Kong/South Africa	GRA	BA.2.41	1	Other
New York City	8419316	2022-05-01	Former VOC Omicron GRA (B.1.1.529+BA.*) first detected in Botswana/Hong Kong/South Africa	GRA	BA.2.42	1	Other
New York City	8419316	2022-05-08	Former VOC Omicron GRA (B.1.1.529+BA.*) first detected in Botswana/Hong Kong/South Africa	GRA	BA.2.42	2	Other
New York City	8419316	2022-06-26	Former VOC Omicron GRA (B.1.1.529+BA.*) first detected in Botswana/Hong Kong/South Africa	GRA	BA.2.42	1	Other
Ontario CA	14570000	2022-05-22	Former VOC Omicron GRA (B.1.1.529+BA.*) first detected in Botswana/Hong Kong/South Africa	GRA	BA.2.42	1	Other
Ontario CA	14570000	2022-06-12	Former VOC Omicron GRA (B.1.1.529+BA.*) first detected in Botswana/Hong Kong/South Africa	GRA	BA.2.42	1	Other
Finger Lakes	1205380	2022-06-12	Former VOC Omicron GRA (B.1.1.529+BA.*) first detected in Botswana/Hong Kong/South Africa	GRA	BA.2.43	1	Other
Long Island	2840341	2022-05-01	Former VOC Omicron GRA (B.1.1.529+BA.*) first detected in Botswana/Hong Kong/South Africa	GRA	BA.2.43	1	Other
New York City	8419316	2022-04-24	Former VOC Omicron GRA (B.1.1.529+BA.*) first detected in Botswana/Hong Kong/South Africa	GRA	BA.2.43	1	Other
New York City	8419316	2022-05-01	Former VOC Omicron GRA (B.1.1.529+BA.*) first detected in Botswana/Hong Kong/South Africa	GRA	BA.2.43	3	Other
New York City	8419316	2022-05-08	Former VOC Omicron GRA (B.1.1.529+BA.*) first detected in Botswana/Hong Kong/South Africa	GRA	BA.2.43	2	Other
New York City	8419316	2022-05-15	Former VOC Omicron GRA (B.1.1.529+BA.*) first detected in Botswana/Hong Kong/South Africa	GRA	BA.2.43	2	Other
New York City	8419316	2022-05-22	Former VOC Omicron GRA (B.1.1.529+BA.*) first detected in Botswana/Hong Kong/South Africa	GRA	BA.2.43	3	Other
New York City	8419316	2022-05-29	Former VOC Omicron GRA (B.1.1.529+BA.*) first detected in Botswana/Hong Kong/South Africa	GRA	BA.2.43	3	Other
New York City	8419316	2022-06-05	Former VOC Omicron GRA (B.1.1.529+BA.*) first detected in Botswana/Hong Kong/South Africa	GRA	BA.2.43	1	Other
Ontario CA	14570000	2022-05-22	Former VOC Omicron GRA (B.1.1.529+BA.*) first detected in Botswana/Hong Kong/South Africa	GRA	BA.2.43	1	Other
New York City	8419316	2022-04-24	Former VOC Omicron GRA (B.1.1.529+BA.*) first detected in Botswana/Hong Kong/South Africa	GRA	BA.2.44	3	Other
New York City	8419316	2022-05-08	Former VOC Omicron GRA (B.1.1.529+BA.*) first detected in Botswana/Hong Kong/South Africa	GRA	BA.2.44	3	Other
New York City	8419316	2022-06-12	Former VOC Omicron GRA (B.1.1.529+BA.*) first detected in Botswana/Hong Kong/South Africa	GRA	BA.2.45	3	Other
New York City	8419316	2022-06-19	Former VOC Omicron GRA (B.1.1.529+BA.*) first detected in Botswana/Hong Kong/South Africa	GRA	BA.2.45	1	Other
New York City	8419316	2022-06-26	Former VOC Omicron GRA (B.1.1.529+BA.*) first detected in Botswana/Hong Kong/South Africa	GRA	BA.2.45	1	Other
New York City	8419316	2022-04-10	Former VOC Omicron GRA (B.1.1.529+BA.*) first detected in Botswana/Hong Kong/South Africa	GRA	BA.2.47	1	Other
New York City	8419316	2022-04-17	Former VOC Omicron GRA (B.1.1.529+BA.*) first detected in Botswana/Hong Kong/South Africa	GRA	BA.2.47	1	Other
New York City	8419316	2022-06-12	Former VOC Omicron GRA (B.1.1.529+BA.*) first detected in Botswana/Hong Kong/South Africa	GRA	BA.2.47	1	Other
New York City	8419316	2022-07-10	Former VOC Omicron GRA (B.1.1.529+BA.*) first detected in Botswana/Hong Kong/South Africa	GRA	BA.2.47	1	Other
Western New York	1382480	2022-06-26	Former VOC Omicron GRA (B.1.1.529+BA.*) first detected in Botswana/Hong Kong/South Africa	GRA	BA.2.47	1	Other
Capital Region	1083201	2022-04-10	Former VOC Omicron GRA (B.1.1.529+BA.*) first detected in Botswana/Hong Kong/South Africa	GRA	BA.2.48	1	Other
Finger Lakes	1205380	2022-06-12	Former VOC Omicron GRA (B.1.1.529+BA.*) first detected in Botswana/Hong Kong/South Africa	GRA	BA.2.48	1	Other
Long Island	2840341	2022-05-08	Former VOC Omicron GRA (B.1.1.529+BA.*) first detected in Botswana/Hong Kong/South Africa	GRA	BA.2.48	1	Other
Mid-Hudson	2319719	2022-04-10	Former VOC Omicron GRA (B.1.1.529+BA.*) first detected in Botswana/Hong Kong/South Africa	GRA	BA.2.48	1	Other
Mid-Hudson	2319719	2022-05-29	Former VOC Omicron GRA (B.1.1.529+BA.*) first detected in Botswana/Hong Kong/South Africa	GRA	BA.2.48	2	Other
Mid-Hudson	2319719	2022-06-05	Former VOC Omicron GRA (B.1.1.529+BA.*) first detected in Botswana/Hong Kong/South Africa	GRA	BA.2.48	1	Other
New York City	8419316	2022-03-20	Former VOC Omicron GRA (B.1.1.529+BA.*) first detected in Botswana/Hong Kong/South Africa	GRA	BA.2.48	1	Other
New York City	8419316	2022-03-27	Former VOC Omicron GRA (B.1.1.529+BA.*) first detected in Botswana/Hong Kong/South Africa	GRA	BA.2.48	1	Other
New York City	8419316	2022-04-03	Former VOC Omicron GRA (B.1.1.529+BA.*) first detected in Botswana/Hong Kong/South Africa	GRA	BA.2.48	8	Other
New York City	8419316	2022-04-10	Former VOC Omicron GRA (B.1.1.529+BA.*) first detected in Botswana/Hong Kong/South Africa	GRA	BA.2.48	31	Other
New York City	8419316	2022-04-17	Former VOC Omicron GRA (B.1.1.529+BA.*) first detected in Botswana/Hong Kong/South Africa	GRA	BA.2.48	51	Other
New York City	8419316	2022-04-24	Former VOC Omicron GRA (B.1.1.529+BA.*) first detected in Botswana/Hong Kong/South Africa	GRA	BA.2.48	61	Other
New York City	8419316	2022-05-01	Former VOC Omicron GRA (B.1.1.529+BA.*) first detected in Botswana/Hong Kong/South Africa	GRA	BA.2.48	67	Other
New York City	8419316	2022-05-08	Former VOC Omicron GRA (B.1.1.529+BA.*) first detected in Botswana/Hong Kong/South Africa	GRA	BA.2.48	103	Other
New York City	8419316	2022-05-15	Former VOC Omicron GRA (B.1.1.529+BA.*) first detected in Botswana/Hong Kong/South Africa	GRA	BA.2.48	75	Other
New York City	8419316	2022-05-22	Former VOC Omicron GRA (B.1.1.529+BA.*) first detected in Botswana/Hong Kong/South Africa	GRA	BA.2.48	40	Other
New York City	8419316	2022-05-29	Former VOC Omicron GRA (B.1.1.529+BA.*) first detected in Botswana/Hong Kong/South Africa	GRA	BA.2.48	29	Other
New York City	8419316	2022-06-05	Former VOC Omicron GRA (B.1.1.529+BA.*) first detected in Botswana/Hong Kong/South Africa	GRA	BA.2.48	25	Other
New York City	8419316	2022-06-12	Former VOC Omicron GRA (B.1.1.529+BA.*) first detected in Botswana/Hong Kong/South Africa	GRA	BA.2.48	15	Other
New York City	8419316	2022-06-19	Former VOC Omicron GRA (B.1.1.529+BA.*) first detected in Botswana/Hong Kong/South Africa	GRA	BA.2.48	10	Other
New York City	8419316	2022-06-26	Former VOC Omicron GRA (B.1.1.529+BA.*) first detected in Botswana/Hong Kong/South Africa	GRA	BA.2.48	10	Other
New York City	8419316	2022-07-03	Former VOC Omicron GRA (B.1.1.529+BA.*) first detected in Botswana/Hong Kong/South Africa	GRA	BA.2.48	6	Other
New York City	8419316	2022-07-10	Former VOC Omicron GRA (B.1.1.529+BA.*) first detected in Botswana/Hong Kong/South Africa	GRA	BA.2.48	3	Other
New York City	8419316	2022-07-17	Former VOC Omicron GRA (B.1.1.529+BA.*) first detected in Botswana/Hong Kong/South Africa	GRA	BA.2.48	2	Other
Western New York	1382480	2022-05-01	Former VOC Omicron GRA (B.1.1.529+BA.*) first detected in Botswana/Hong Kong/South Africa	GRA	BA.2.48	1	Other
Ontario CA	14570000	2022-06-05	Former VOC Omicron GRA (B.1.1.529+BA.*) first detected in Botswana/Hong Kong/South Africa	GRA	BA.2.48	1	Other
Ontario CA	14570000	2022-06-12	Former VOC Omicron GRA (B.1.1.529+BA.*) first detected in Botswana/Hong Kong/South Africa	GRA	BA.2.48	1	Other
Ontario CA	14570000	2022-06-19	Former VOC Omicron GRA (B.1.1.529+BA.*) first detected in Botswana/Hong Kong/South Africa	GRA	BA.2.48	1	Other
Ontario CA	14570000	2022-06-26	Former VOC Omicron GRA (B.1.1.529+BA.*) first detected in Botswana/Hong Kong/South Africa	GRA	BA.2.48	1	Other
Ontario CA	14570000	2022-07-03	Former VOC Omicron GRA (B.1.1.529+BA.*) first detected in Botswana/Hong Kong/South Africa	GRA	BA.2.48	1	Other
Ontario CA	14570000	2022-07-10	Former VOC Omicron GRA (B.1.1.529+BA.*) first detected in Botswana/Hong Kong/South Africa	GRA	BA.2.48	1	Other
New York City	8419316	2022-04-10	Former VOC Omicron GRA (B.1.1.529+BA.*) first detected in Botswana/Hong Kong/South Africa	GRA	BA.2.49	2	Other
New York City	8419316	2022-05-22	Former VOC Omicron GRA (B.1.1.529+BA.*) first detected in Botswana/Hong Kong/South Africa	GRA	BA.2.49	1	Other
New York City	8419316	2022-06-26	Former VOC Omicron GRA (B.1.1.529+BA.*) first detected in Botswana/Hong Kong/South Africa	GRA	BA.2.49	1	Other
Ontario CA	14570000	2022-03-27	Former VOC Omicron GRA (B.1.1.529+BA.*) first detected in Botswana/Hong Kong/South Africa	GRA	BA.2.49	1	Other
Ontario CA	14570000	2022-04-10	Former VOC Omicron GRA (B.1.1.529+BA.*) first detected in Botswana/Hong Kong/South Africa	GRA	BA.2.49	1	Other
Capital Region	1083201	2022-04-24	Former VOC Omicron GRA (B.1.1.529+BA.*) first detected in Botswana/Hong Kong/South Africa	GRA	BA.2.5	2	Other
Capital Region	1083201	2022-05-15	Former VOC Omicron GRA (B.1.1.529+BA.*) first detected in Botswana/Hong Kong/South Africa	GRA	BA.2.5	1	Other
Finger Lakes	1205380	2022-04-10	Former VOC Omicron GRA (B.1.1.529+BA.*) first detected in Botswana/Hong Kong/South Africa	GRA	BA.2.5	1	Other
New York City	8419316	2022-01-09	Former VOC Omicron GRA (B.1.1.529+BA.*) first detected in Botswana/Hong Kong/South Africa	GRA	BA.2.5	1	Other
New York City	8419316	2022-02-13	Former VOC Omicron GRA (B.1.1.529+BA.*) first detected in Botswana/Hong Kong/South Africa	GRA	BA.2.5	1	Other
New York City	8419316	2022-02-20	Former VOC Omicron GRA (B.1.1.529+BA.*) first detected in Botswana/Hong Kong/South Africa	GRA	BA.2.5	5	Other
New York City	8419316	2022-02-27	Former VOC Omicron GRA (B.1.1.529+BA.*) first detected in Botswana/Hong Kong/South Africa	GRA	BA.2.5	8	Other
New York City	8419316	2022-03-06	Former VOC Omicron GRA (B.1.1.529+BA.*) first detected in Botswana/Hong Kong/South Africa	GRA	BA.2.5	9	Other
New York City	8419316	2022-03-13	Former VOC Omicron GRA (B.1.1.529+BA.*) first detected in Botswana/Hong Kong/South Africa	GRA	BA.2.5	11	Other
New York City	8419316	2022-03-20	Former VOC Omicron GRA (B.1.1.529+BA.*) first detected in Botswana/Hong Kong/South Africa	GRA	BA.2.5	15	Other
New York City	8419316	2022-03-27	Former VOC Omicron GRA (B.1.1.529+BA.*) first detected in Botswana/Hong Kong/South Africa	GRA	BA.2.5	14	Other
New York City	8419316	2022-04-03	Former VOC Omicron GRA (B.1.1.529+BA.*) first detected in Botswana/Hong Kong/South Africa	GRA	BA.2.5	18	Other
New York City	8419316	2022-04-10	Former VOC Omicron GRA (B.1.1.529+BA.*) first detected in Botswana/Hong Kong/South Africa	GRA	BA.2.5	7	Other
New York City	8419316	2022-04-17	Former VOC Omicron GRA (B.1.1.529+BA.*) first detected in Botswana/Hong Kong/South Africa	GRA	BA.2.5	19	Other
New York City	8419316	2022-04-24	Former VOC Omicron GRA (B.1.1.529+BA.*) first detected in Botswana/Hong Kong/South Africa	GRA	BA.2.5	8	Other
New York City	8419316	2022-05-01	Former VOC Omicron GRA (B.1.1.529+BA.*) first detected in Botswana/Hong Kong/South Africa	GRA	BA.2.5	7	Other
New York City	8419316	2022-05-08	Former VOC Omicron GRA (B.1.1.529+BA.*) first detected in Botswana/Hong Kong/South Africa	GRA	BA.2.5	7	Other
New York City	8419316	2022-05-15	Former VOC Omicron GRA (B.1.1.529+BA.*) first detected in Botswana/Hong Kong/South Africa	GRA	BA.2.5	3	Other
New York City	8419316	2022-05-22	Former VOC Omicron GRA (B.1.1.529+BA.*) first detected in Botswana/Hong Kong/South Africa	GRA	BA.2.5	4	Other
New York City	8419316	2022-05-29	Former VOC Omicron GRA (B.1.1.529+BA.*) first detected in Botswana/Hong Kong/South Africa	GRA	BA.2.5	2	Other
New York City	8419316	2022-06-05	Former VOC Omicron GRA (B.1.1.529+BA.*) first detected in Botswana/Hong Kong/South Africa	GRA	BA.2.5	1	Other
Western New York	1382480	2022-03-20	Former VOC Omicron GRA (B.1.1.529+BA.*) first detected in Botswana/Hong Kong/South Africa	GRA	BA.2.5	1	Other
Ontario CA	14570000	2022-03-06	Former VOC Omicron GRA (B.1.1.529+BA.*) first detected in Botswana/Hong Kong/South Africa	GRA	BA.2.5	3	Other
Ontario CA	14570000	2022-03-13	Former VOC Omicron GRA (B.1.1.529+BA.*) first detected in Botswana/Hong Kong/South Africa	GRA	BA.2.5	4	Other
Ontario CA	14570000	2022-03-20	Former VOC Omicron GRA (B.1.1.529+BA.*) first detected in Botswana/Hong Kong/South Africa	GRA	BA.2.5	2	Other
Ontario CA	14570000	2022-03-27	Former VOC Omicron GRA (B.1.1.529+BA.*) first detected in Botswana/Hong Kong/South Africa	GRA	BA.2.5	6	Other
Ontario CA	14570000	2022-04-03	Former VOC Omicron GRA (B.1.1.529+BA.*) first detected in Botswana/Hong Kong/South Africa	GRA	BA.2.5	9	Other
Ontario CA	14570000	2022-04-10	Former VOC Omicron GRA (B.1.1.529+BA.*) first detected in Botswana/Hong Kong/South Africa	GRA	BA.2.5	3	Other
Ontario CA	14570000	2022-04-17	Former VOC Omicron GRA (B.1.1.529+BA.*) first detected in Botswana/Hong Kong/South Africa	GRA	BA.2.5	3	Other
Ontario CA	14570000	2022-04-24	Former VOC Omicron GRA (B.1.1.529+BA.*) first detected in Botswana/Hong Kong/South Africa	GRA	BA.2.5	2	Other
Ontario CA	14570000	2022-05-01	Former VOC Omicron GRA (B.1.1.529+BA.*) first detected in Botswana/Hong Kong/South Africa	GRA	BA.2.5	2	Other
Ontario CA	14570000	2022-05-08	Former VOC Omicron GRA (B.1.1.529+BA.*) first detected in Botswana/Hong Kong/South Africa	GRA	BA.2.5	2	Other
Ontario CA	14570000	2022-05-15	Former VOC Omicron GRA (B.1.1.529+BA.*) first detected in Botswana/Hong Kong/South Africa	GRA	BA.2.5	1	Other
New York City	8419316	2022-07-03	Former VOC Omicron GRA (B.1.1.529+BA.*) first detected in Botswana/Hong Kong/South Africa	GRA	BA.2.50	1	Other
Ontario CA	14570000	2022-06-05	Former VOC Omicron GRA (B.1.1.529+BA.*) first detected in Botswana/Hong Kong/South Africa	GRA	BA.2.50	5	Other
Ontario CA	14570000	2022-06-12	Former VOC Omicron GRA (B.1.1.529+BA.*) first detected in Botswana/Hong Kong/South Africa	GRA	BA.2.50	2	Other
Ontario CA	14570000	2022-06-19	Former VOC Omicron GRA (B.1.1.529+BA.*) first detected in Botswana/Hong Kong/South Africa	GRA	BA.2.50	1	Other
New York City	8419316	2022-02-27	Former VOC Omicron GRA (B.1.1.529+BA.*) first detected in Botswana/Hong Kong/South Africa	GRA	BA.2.51	1	Other
Ontario CA	14570000	2022-02-20	Former VOC Omicron GRA (B.1.1.529+BA.*) first detected in Botswana/Hong Kong/South Africa	GRA	BA.2.51	1	Other
Ontario CA	14570000	2022-02-27	Former VOC Omicron GRA (B.1.1.529+BA.*) first detected in Botswana/Hong Kong/South Africa	GRA	BA.2.51	4	Other
Ontario CA	14570000	2022-03-06	Former VOC Omicron GRA (B.1.1.529+BA.*) first detected in Botswana/Hong Kong/South Africa	GRA	BA.2.51	3	Other
Ontario CA	14570000	2022-03-13	Former VOC Omicron GRA (B.1.1.529+BA.*) first detected in Botswana/Hong Kong/South Africa	GRA	BA.2.51	5	Other
Ontario CA	14570000	2022-03-20	Former VOC Omicron GRA (B.1.1.529+BA.*) first detected in Botswana/Hong Kong/South Africa	GRA	BA.2.51	3	Other
Ontario CA	14570000	2022-03-27	Former VOC Omicron GRA (B.1.1.529+BA.*) first detected in Botswana/Hong Kong/South Africa	GRA	BA.2.51	1	Other
Ontario CA	14570000	2022-04-03	Former VOC Omicron GRA (B.1.1.529+BA.*) first detected in Botswana/Hong Kong/South Africa	GRA	BA.2.51	1	Other
New York City	8419316	2022-04-03	Former VOC Omicron GRA (B.1.1.529+BA.*) first detected in Botswana/Hong Kong/South Africa	GRA	BA.2.52	3	Other
New York City	8419316	2022-04-24	Former VOC Omicron GRA (B.1.1.529+BA.*) first detected in Botswana/Hong Kong/South Africa	GRA	BA.2.52	2	Other
New York City	8419316	2022-05-01	Former VOC Omicron GRA (B.1.1.529+BA.*) first detected in Botswana/Hong Kong/South Africa	G	BA.2.52	1	Other
New York City	8419316	2022-05-01	Former VOC Omicron GRA (B.1.1.529+BA.*) first detected in Botswana/Hong Kong/South Africa	GRA	BA.2.52	6	Other
New York City	8419316	2022-05-08	Former VOC Omicron GRA (B.1.1.529+BA.*) first detected in Botswana/Hong Kong/South Africa	GRA	BA.2.52	3	Other
New York City	8419316	2022-05-15	Former VOC Omicron GRA (B.1.1.529+BA.*) first detected in Botswana/Hong Kong/South Africa	GRA	BA.2.52	4	Other
New York City	8419316	2022-05-29	Former VOC Omicron GRA (B.1.1.529+BA.*) first detected in Botswana/Hong Kong/South Africa	GRA	BA.2.52	4	Other
New York City	8419316	2022-06-05	Former VOC Omicron GRA (B.1.1.529+BA.*) first detected in Botswana/Hong Kong/South Africa	GRA	BA.2.52	2	Other
New York City	8419316	2022-06-12	Former VOC Omicron GRA (B.1.1.529+BA.*) first detected in Botswana/Hong Kong/South Africa	GRA	BA.2.52	7	Other
New York City	8419316	2022-06-19	Former VOC Omicron GRA (B.1.1.529+BA.*) first detected in Botswana/Hong Kong/South Africa	GRA	BA.2.52	1	Other
New York City	8419316	2022-07-03	Former VOC Omicron GRA (B.1.1.529+BA.*) first detected in Botswana/Hong Kong/South Africa	GRA	BA.2.52	1	Other
Ontario CA	14570000	2022-05-15	Former VOC Omicron GRA (B.1.1.529+BA.*) first detected in Botswana/Hong Kong/South Africa	GRA	BA.2.52	1	Other
Ontario CA	14570000	2022-06-05	Former VOC Omicron GRA (B.1.1.529+BA.*) first detected in Botswana/Hong Kong/South Africa	GRA	BA.2.52	1	Other
Finger Lakes	1205380	2022-05-15	Former VOC Omicron GRA (B.1.1.529+BA.*) first detected in Botswana/Hong Kong/South Africa	GRA	BA.2.53	1	Other
New York City	8419316	2022-04-10	Former VOC Omicron GRA (B.1.1.529+BA.*) first detected in Botswana/Hong Kong/South Africa	GRA	BA.2.53	1	Other
Ontario CA	14570000	2022-06-19	Former VOC Omicron GRA (B.1.1.529+BA.*) first detected in Botswana/Hong Kong/South Africa	GRA	BA.2.53	1	Other
New York City	8419316	2022-06-12	Former VOC Omicron GRA (B.1.1.529+BA.*) first detected in Botswana/Hong Kong/South Africa	GRA	BA.2.54	1	Other
New York City	8419316	2022-06-19	Former VOC Omicron GRA (B.1.1.529+BA.*) first detected in Botswana/Hong Kong/South Africa	GRA	BA.2.54	1	Other
New York City	8419316	2022-06-26	Former VOC Omicron GRA (B.1.1.529+BA.*) first detected in Botswana/Hong Kong/South Africa	GRA	BA.2.54	1	Other
New York City	8419316	2022-04-03	Former VOC Omicron GRA (B.1.1.529+BA.*) first detected in Botswana/Hong Kong/South Africa	GRA	BA.2.55	1	Other
New York City	8419316	2022-05-15	Former VOC Omicron GRA (B.1.1.529+BA.*) first detected in Botswana/Hong Kong/South Africa	GRA	BA.2.55	4	Other
New York City	8419316	2022-05-22	Former VOC Omicron GRA (B.1.1.529+BA.*) first detected in Botswana/Hong Kong/South Africa	GRA	BA.2.55	3	Other
New York City	8419316	2022-05-29	Former VOC Omicron GRA (B.1.1.529+BA.*) first detected in Botswana/Hong Kong/South Africa	GRA	BA.2.55	4	Other
New York City	8419316	2022-06-05	Former VOC Omicron GRA (B.1.1.529+BA.*) first detected in Botswana/Hong Kong/South Africa	GRA	BA.2.55	3	Other
New York City	8419316	2022-06-12	Former VOC Omicron GRA (B.1.1.529+BA.*) first detected in Botswana/Hong Kong/South Africa	GRA	BA.2.55	1	Other
New York City	8419316	2022-07-24	Former VOC Omicron GRA (B.1.1.529+BA.*) first detected in Botswana/Hong Kong/South Africa	GRA	BA.2.55	1	Other
Ontario CA	14570000	2022-05-29	Former VOC Omicron GRA (B.1.1.529+BA.*) first detected in Botswana/Hong Kong/South Africa	GRA	BA.2.55	1	Other
Finger Lakes	1205380	2022-05-22	Former VOC Omicron GRA (B.1.1.529+BA.*) first detected in Botswana/Hong Kong/South Africa	GRA	BA.2.56	1	Other
New York City	8419316	2022-03-20	Former VOC Omicron GRA (B.1.1.529+BA.*) first detected in Botswana/Hong Kong/South Africa	GRA	BA.2.56	1	Other
New York City	8419316	2022-03-27	Former VOC Omicron GRA (B.1.1.529+BA.*) first detected in Botswana/Hong Kong/South Africa	GRA	BA.2.56	1	Other
New York City	8419316	2022-04-03	Former VOC Omicron GRA (B.1.1.529+BA.*) first detected in Botswana/Hong Kong/South Africa	GR	BA.2.56	1	Other
New York City	8419316	2022-04-24	Former VOC Omicron GRA (B.1.1.529+BA.*) first detected in Botswana/Hong Kong/South Africa	GRA	BA.2.56	1	Other
New York City	8419316	2022-05-01	Former VOC Omicron GRA (B.1.1.529+BA.*) first detected in Botswana/Hong Kong/South Africa	GRA	BA.2.56	2	Other
New York City	8419316	2022-05-08	Former VOC Omicron GRA (B.1.1.529+BA.*) first detected in Botswana/Hong Kong/South Africa	GRA	BA.2.56	6	Other
New York City	8419316	2022-05-15	Former VOC Omicron GRA (B.1.1.529+BA.*) first detected in Botswana/Hong Kong/South Africa	GRA	BA.2.56	3	Other
New York City	8419316	2022-05-22	Former VOC Omicron GRA (B.1.1.529+BA.*) first detected in Botswana/Hong Kong/South Africa	GRA	BA.2.56	10	Other
New York City	8419316	2022-05-29	Former VOC Omicron GRA (B.1.1.529+BA.*) first detected in Botswana/Hong Kong/South Africa	GRA	BA.2.56	9	Other
New York City	8419316	2022-06-05	Former VOC Omicron GRA (B.1.1.529+BA.*) first detected in Botswana/Hong Kong/South Africa	GRA	BA.2.56	5	Other
New York City	8419316	2022-06-12	Former VOC Omicron GRA (B.1.1.529+BA.*) first detected in Botswana/Hong Kong/South Africa	GRA	BA.2.56	7	Other
New York City	8419316	2022-06-19	Former VOC Omicron GRA (B.1.1.529+BA.*) first detected in Botswana/Hong Kong/South Africa	GRA	BA.2.56	7	Other
New York City	8419316	2022-06-26	Former VOC Omicron GRA (B.1.1.529+BA.*) first detected in Botswana/Hong Kong/South Africa	GRA	BA.2.56	8	Other
New York City	8419316	2022-07-03	Former VOC Omicron GRA (B.1.1.529+BA.*) first detected in Botswana/Hong Kong/South Africa	GRA	BA.2.56	6	Other
New York City	8419316	2022-07-10	Former VOC Omicron GRA (B.1.1.529+BA.*) first detected in Botswana/Hong Kong/South Africa	GRA	BA.2.56	3	Other
New York City	8419316	2022-07-17	Former VOC Omicron GRA (B.1.1.529+BA.*) first detected in Botswana/Hong Kong/South Africa	GRA	BA.2.56	2	Other
New York City	8419316	2022-07-31	Former VOC Omicron GRA (B.1.1.529+BA.*) first detected in Botswana/Hong Kong/South Africa	GRA	BA.2.56	1	Other
Ontario CA	14570000	2022-03-13	Former VOC Omicron GRA (B.1.1.529+BA.*) first detected in Botswana/Hong Kong/South Africa	GRA	BA.2.56	2	Other
Ontario CA	14570000	2022-03-20	Former VOC Omicron GRA (B.1.1.529+BA.*) first detected in Botswana/Hong Kong/South Africa	GRA	BA.2.56	1	Other
Ontario CA	14570000	2022-05-15	Former VOC Omicron GRA (B.1.1.529+BA.*) first detected in Botswana/Hong Kong/South Africa	GRA	BA.2.56	1	Other
Ontario CA	14570000	2022-05-22	Former VOC Omicron GRA (B.1.1.529+BA.*) first detected in Botswana/Hong Kong/South Africa	GRA	BA.2.56	1	Other
Ontario CA	14570000	2022-05-29	Former VOC Omicron GRA (B.1.1.529+BA.*) first detected in Botswana/Hong Kong/South Africa	GRA	BA.2.56	1	Other
Ontario CA	14570000	2022-06-05	Former VOC Omicron GRA (B.1.1.529+BA.*) first detected in Botswana/Hong Kong/South Africa	GRA	BA.2.56	3	Other
Ontario CA	14570000	2022-06-12	Former VOC Omicron GRA (B.1.1.529+BA.*) first detected in Botswana/Hong Kong/South Africa	GRA	BA.2.56	3	Other
Ontario CA	14570000	2022-06-19	Former VOC Omicron GRA (B.1.1.529+BA.*) first detected in Botswana/Hong Kong/South Africa	GRA	BA.2.56	2	Other
Ontario CA	14570000	2022-06-26	Former VOC Omicron GRA (B.1.1.529+BA.*) first detected in Botswana/Hong Kong/South Africa	GRA	BA.2.56	2	Other
Ontario CA	14570000	2022-07-03	Former VOC Omicron GRA (B.1.1.529+BA.*) first detected in Botswana/Hong Kong/South Africa	GRA	BA.2.56	2	Other
New York City	8419316	2022-05-15	Former VOC Omicron GRA (B.1.1.529+BA.*) first detected in Botswana/Hong Kong/South Africa	GRA	BA.2.57	1	Other
Ontario CA	14570000	2022-03-27	Former VOC Omicron GRA (B.1.1.529+BA.*) first detected in Botswana/Hong Kong/South Africa	GRA	BA.2.57	1	Other
New York City	8419316	2022-05-08	Former VOC Omicron GRA (B.1.1.529+BA.*) first detected in Botswana/Hong Kong/South Africa	GRA	BA.2.58	1	Other
New York City	8419316	2022-04-17	Former VOC Omicron GRA (B.1.1.529+BA.*) first detected in Botswana/Hong Kong/South Africa	GRA	BA.2.59	1	Other
New York City	8419316	2022-05-08	Former VOC Omicron GRA (B.1.1.529+BA.*) first detected in Botswana/Hong Kong/South Africa	GRA	BA.2.59	2	Other
New York City	8419316	2022-05-15	Former VOC Omicron GRA (B.1.1.529+BA.*) first detected in Botswana/Hong Kong/South Africa	GRA	BA.2.59	1	Other
Mid-Hudson	2319719	2022-05-01	Former VOC Omicron GRA (B.1.1.529+BA.*) first detected in Botswana/Hong Kong/South Africa	GRA	BA.2.6	2	Other
Mid-Hudson	2319719	2022-05-22	Former VOC Omicron GRA (B.1.1.529+BA.*) first detected in Botswana/Hong Kong/South Africa	GRA	BA.2.6	1	Other
New York City	8419316	2022-03-27	Former VOC Omicron GRA (B.1.1.529+BA.*) first detected in Botswana/Hong Kong/South Africa	GRA	BA.2.6	3	Other
New York City	8419316	2022-04-03	Former VOC Omicron GRA (B.1.1.529+BA.*) first detected in Botswana/Hong Kong/South Africa	GRA	BA.2.6	6	Other
New York City	8419316	2022-04-10	Former VOC Omicron GRA (B.1.1.529+BA.*) first detected in Botswana/Hong Kong/South Africa	GRA	BA.2.6	2	Other
New York City	8419316	2022-04-17	Former VOC Omicron GRA (B.1.1.529+BA.*) first detected in Botswana/Hong Kong/South Africa	GRA	BA.2.6	4	Other
New York City	8419316	2022-04-24	Former VOC Omicron GRA (B.1.1.529+BA.*) first detected in Botswana/Hong Kong/South Africa	GRA	BA.2.6	14	Other
New York City	8419316	2022-05-01	Former VOC Omicron GRA (B.1.1.529+BA.*) first detected in Botswana/Hong Kong/South Africa	GRA	BA.2.6	8	Other
New York City	8419316	2022-05-08	Former VOC Omicron GRA (B.1.1.529+BA.*) first detected in Botswana/Hong Kong/South Africa	GRA	BA.2.6	5	Other
New York City	8419316	2022-05-15	Former VOC Omicron GRA (B.1.1.529+BA.*) first detected in Botswana/Hong Kong/South Africa	GRA	BA.2.6	3	Other
Ontario CA	14570000	2022-03-20	Former VOC Omicron GRA (B.1.1.529+BA.*) first detected in Botswana/Hong Kong/South Africa	GRA	BA.2.6	1	Other
Finger Lakes	1205380	2022-04-10	Former VOC Omicron GRA (B.1.1.529+BA.*) first detected in Botswana/Hong Kong/South Africa	GRA	BA.2.60	1	Other
New York City	8419316	2022-04-17	Former VOC Omicron GRA (B.1.1.529+BA.*) first detected in Botswana/Hong Kong/South Africa	GRA	BA.2.60	1	Other
New York City	8419316	2022-06-12	Former VOC Omicron GRA (B.1.1.529+BA.*) first detected in Botswana/Hong Kong/South Africa	GRA	BA.2.60	1	Other
New York City	8419316	2022-06-26	Former VOC Omicron GRA (B.1.1.529+BA.*) first detected in Botswana/Hong Kong/South Africa	GRA	BA.2.60	1	Other
New York City	8419316	2022-05-15	Former VOC Omicron GRA (B.1.1.529+BA.*) first detected in Botswana/Hong Kong/South Africa	GRA	BA.2.61	2	Other
New York City	8419316	2022-05-22	Former VOC Omicron GRA (B.1.1.529+BA.*) first detected in Botswana/Hong Kong/South Africa	GRA	BA.2.61	1	Other
New York City	8419316	2022-05-29	Former VOC Omicron GRA (B.1.1.529+BA.*) first detected in Botswana/Hong Kong/South Africa	GRA	BA.2.61	2	Other
New York City	8419316	2022-06-05	Former VOC Omicron GRA (B.1.1.529+BA.*) first detected in Botswana/Hong Kong/South Africa	GRA	BA.2.61	1	Other
New York City	8419316	2022-06-12	Former VOC Omicron GRA (B.1.1.529+BA.*) first detected in Botswana/Hong Kong/South Africa	GRA	BA.2.61	2	Other
New York City	8419316	2022-06-19	Former VOC Omicron GRA (B.1.1.529+BA.*) first detected in Botswana/Hong Kong/South Africa	GRA	BA.2.61	2	Other
New York City	8419316	2022-04-17	Former VOC Omicron GRA (B.1.1.529+BA.*) first detected in Botswana/Hong Kong/South Africa	GRA	BA.2.62	1	Other
Southern Tier	636657	2022-04-17	Former VOC Omicron GRA (B.1.1.529+BA.*) first detected in Botswana/Hong Kong/South Africa	GRA	BA.2.62	1	Other
New York City	8419316	2022-03-27	Former VOC Omicron GRA (B.1.1.529+BA.*) first detected in Botswana/Hong Kong/South Africa	GRA	BA.2.63	1	Other
New York City	8419316	2022-04-03	Former VOC Omicron GRA (B.1.1.529+BA.*) first detected in Botswana/Hong Kong/South Africa	GRA	BA.2.63	2	Other
New York City	8419316	2022-04-10	Former VOC Omicron GRA (B.1.1.529+BA.*) first detected in Botswana/Hong Kong/South Africa	GRA	BA.2.63	2	Other
New York City	8419316	2022-04-17	Former VOC Omicron GRA (B.1.1.529+BA.*) first detected in Botswana/Hong Kong/South Africa	GRA	BA.2.63	1	Other
New York City	8419316	2022-04-24	Former VOC Omicron GRA (B.1.1.529+BA.*) first detected in Botswana/Hong Kong/South Africa	GRA	BA.2.63	2	Other
Mid-Hudson	2319719	2022-06-12	Former VOC Omicron GRA (B.1.1.529+BA.*) first detected in Botswana/Hong Kong/South Africa	GRA	BA.2.64	1	Other
New York City	8419316	2022-03-27	Former VOC Omicron GRA (B.1.1.529+BA.*) first detected in Botswana/Hong Kong/South Africa	GRA	BA.2.64	1	Other
New York City	8419316	2022-04-03	Former VOC Omicron GRA (B.1.1.529+BA.*) first detected in Botswana/Hong Kong/South Africa	GRA	BA.2.64	5	Other
New York City	8419316	2022-04-17	Former VOC Omicron GRA (B.1.1.529+BA.*) first detected in Botswana/Hong Kong/South Africa	GRA	BA.2.64	1	Other
New York City	8419316	2022-05-01	Former VOC Omicron GRA (B.1.1.529+BA.*) first detected in Botswana/Hong Kong/South Africa	GRA	BA.2.64	2	Other
New York City	8419316	2022-05-08	Former VOC Omicron GRA (B.1.1.529+BA.*) first detected in Botswana/Hong Kong/South Africa	GRA	BA.2.64	4	Other
New York City	8419316	2022-05-15	Former VOC Omicron GRA (B.1.1.529+BA.*) first detected in Botswana/Hong Kong/South Africa	GRA	BA.2.64	3	Other
New York City	8419316	2022-05-22	Former VOC Omicron GRA (B.1.1.529+BA.*) first detected in Botswana/Hong Kong/South Africa	GRA	BA.2.64	1	Other
Ontario CA	14570000	2022-03-27	Former VOC Omicron GRA (B.1.1.529+BA.*) first detected in Botswana/Hong Kong/South Africa	GRA	BA.2.64	1	Other
Ontario CA	14570000	2022-04-10	Former VOC Omicron GRA (B.1.1.529+BA.*) first detected in Botswana/Hong Kong/South Africa	GRA	BA.2.64	1	Other
Ontario CA	14570000	2022-04-17	Former VOC Omicron GRA (B.1.1.529+BA.*) first detected in Botswana/Hong Kong/South Africa	GRA	BA.2.64	1	Other
Ontario CA	14570000	2022-04-24	Former VOC Omicron GRA (B.1.1.529+BA.*) first detected in Botswana/Hong Kong/South Africa	GRA	BA.2.64	2	Other
Ontario CA	14570000	2022-05-01	Former VOC Omicron GRA (B.1.1.529+BA.*) first detected in Botswana/Hong Kong/South Africa	GRA	BA.2.64	1	Other
Ontario CA	14570000	2022-05-08	Former VOC Omicron GRA (B.1.1.529+BA.*) first detected in Botswana/Hong Kong/South Africa	GRA	BA.2.64	1	Other
Ontario CA	14570000	2022-06-19	Former VOC Omicron GRA (B.1.1.529+BA.*) first detected in Botswana/Hong Kong/South Africa	GRA	BA.2.64	1	Other
New York City	8419316	2022-06-12	Former VOC Omicron GRA (B.1.1.529+BA.*) first detected in Botswana/Hong Kong/South Africa	GRA	BA.2.66	1	Other
Ontario CA	14570000	2022-03-20	Former VOC Omicron GRA (B.1.1.529+BA.*) first detected in Botswana/Hong Kong/South Africa	GRA	BA.2.66	3	Other
Ontario CA	14570000	2022-03-27	Former VOC Omicron GRA (B.1.1.529+BA.*) first detected in Botswana/Hong Kong/South Africa	GRA	BA.2.66	1	Other
Ontario CA	14570000	2022-04-03	Former VOC Omicron GRA (B.1.1.529+BA.*) first detected in Botswana/Hong Kong/South Africa	GRA	BA.2.66	2	Other
Ontario CA	14570000	2022-04-10	Former VOC Omicron GRA (B.1.1.529+BA.*) first detected in Botswana/Hong Kong/South Africa	GRA	BA.2.66	1	Other
Ontario CA	14570000	2022-04-17	Former VOC Omicron GRA (B.1.1.529+BA.*) first detected in Botswana/Hong Kong/South Africa	GRA	BA.2.66	2	Other
Ontario CA	14570000	2022-05-01	Former VOC Omicron GRA (B.1.1.529+BA.*) first detected in Botswana/Hong Kong/South Africa	GRA	BA.2.66	1	Other
Ontario CA	14570000	2022-05-15	Former VOC Omicron GRA (B.1.1.529+BA.*) first detected in Botswana/Hong Kong/South Africa	GRA	BA.2.66	1	Other
Ontario CA	14570000	2022-05-22	Former VOC Omicron GRA (B.1.1.529+BA.*) first detected in Botswana/Hong Kong/South Africa	GRA	BA.2.66	1	Other
Ontario CA	14570000	2022-06-19	Former VOC Omicron GRA (B.1.1.529+BA.*) first detected in Botswana/Hong Kong/South Africa	GRA	BA.2.66	1	Other
New York City	8419316	2022-03-20	Former VOC Omicron GRA (B.1.1.529+BA.*) first detected in Botswana/Hong Kong/South Africa	GRA	BA.2.68	2	Other
New York City	8419316	2022-03-27	Former VOC Omicron GRA (B.1.1.529+BA.*) first detected in Botswana/Hong Kong/South Africa	GRA	BA.2.68	5	Other
New York City	8419316	2022-04-03	Former VOC Omicron GRA (B.1.1.529+BA.*) first detected in Botswana/Hong Kong/South Africa	GRA	BA.2.68	3	Other
New York City	8419316	2022-04-10	Former VOC Omicron GRA (B.1.1.529+BA.*) first detected in Botswana/Hong Kong/South Africa	GRA	BA.2.68	2	Other
New York City	8419316	2022-04-17	Former VOC Omicron GRA (B.1.1.529+BA.*) first detected in Botswana/Hong Kong/South Africa	GRA	BA.2.68	1	Other
New York City	8419316	2022-04-24	Former VOC Omicron GRA (B.1.1.529+BA.*) first detected in Botswana/Hong Kong/South Africa	GRA	BA.2.68	2	Other
New York City	8419316	2022-05-01	Former VOC Omicron GRA (B.1.1.529+BA.*) first detected in Botswana/Hong Kong/South Africa	GRA	BA.2.68	4	Other
New York City	8419316	2022-05-08	Former VOC Omicron GRA (B.1.1.529+BA.*) first detected in Botswana/Hong Kong/South Africa	GRA	BA.2.68	3	Other
New York City	8419316	2022-05-15	Former VOC Omicron GRA (B.1.1.529+BA.*) first detected in Botswana/Hong Kong/South Africa	GRA	BA.2.68	2	Other
New York City	8419316	2022-05-22	Former VOC Omicron GRA (B.1.1.529+BA.*) first detected in Botswana/Hong Kong/South Africa	GRA	BA.2.68	3	Other
New York City	8419316	2022-05-29	Former VOC Omicron GRA (B.1.1.529+BA.*) first detected in Botswana/Hong Kong/South Africa	GRA	BA.2.68	1	Other
New York City	8419316	2022-06-05	Former VOC Omicron GRA (B.1.1.529+BA.*) first detected in Botswana/Hong Kong/South Africa	GRA	BA.2.68	1	Other
New York City	8419316	2022-06-19	Former VOC Omicron GRA (B.1.1.529+BA.*) first detected in Botswana/Hong Kong/South Africa	GRA	BA.2.68	1	Other
Ontario CA	14570000	2022-04-24	Former VOC Omicron GRA (B.1.1.529+BA.*) first detected in Botswana/Hong Kong/South Africa	GRA	BA.2.68	1	Other
Capital Region	1083201	2022-04-17	Former VOC Omicron GRA (B.1.1.529+BA.*) first detected in Botswana/Hong Kong/South Africa	GRA	BA.2.7	1	Other
Capital Region	1083201	2022-04-24	Former VOC Omicron GRA (B.1.1.529+BA.*) first detected in Botswana/Hong Kong/South Africa	GRA	BA.2.7	4	Other
Capital Region	1083201	2022-05-01	Former VOC Omicron GRA (B.1.1.529+BA.*) first detected in Botswana/Hong Kong/South Africa	GRA	BA.2.7	1	Other
Capital Region	1083201	2022-05-29	Former VOC Omicron GRA (B.1.1.529+BA.*) first detected in Botswana/Hong Kong/South Africa	GRA	BA.2.7	1	Other
Central New York	777706	2022-03-20	Former VOC Omicron GRA (B.1.1.529+BA.*) first detected in Botswana/Hong Kong/South Africa	GRA	BA.2.7	1	Other
Central New York	777706	2022-03-27	Former VOC Omicron GRA (B.1.1.529+BA.*) first detected in Botswana/Hong Kong/South Africa	GRA	BA.2.7	1	Other
Central New York	777706	2022-04-03	Former VOC Omicron GRA (B.1.1.529+BA.*) first detected in Botswana/Hong Kong/South Africa	GRA	BA.2.7	1	Other
Finger Lakes	1205380	2022-03-20	Former VOC Omicron GRA (B.1.1.529+BA.*) first detected in Botswana/Hong Kong/South Africa	GRA	BA.2.7	1	Other
Finger Lakes	1205380	2022-03-27	Former VOC Omicron GRA (B.1.1.529+BA.*) first detected in Botswana/Hong Kong/South Africa	GRA	BA.2.7	2	Other
Finger Lakes	1205380	2022-04-10	Former VOC Omicron GRA (B.1.1.529+BA.*) first detected in Botswana/Hong Kong/South Africa	GRA	BA.2.7	1	Other
Finger Lakes	1205380	2022-04-17	Former VOC Omicron GRA (B.1.1.529+BA.*) first detected in Botswana/Hong Kong/South Africa	GRA	BA.2.7	1	Other
Finger Lakes	1205380	2022-04-24	Former VOC Omicron GRA (B.1.1.529+BA.*) first detected in Botswana/Hong Kong/South Africa	GRA	BA.2.7	2	Other
Finger Lakes	1205380	2022-05-08	Former VOC Omicron GRA (B.1.1.529+BA.*) first detected in Botswana/Hong Kong/South Africa	GRA	BA.2.7	2	Other
Finger Lakes	1205380	2022-05-29	Former VOC Omicron GRA (B.1.1.529+BA.*) first detected in Botswana/Hong Kong/South Africa	GRA	BA.2.7	1	Other
Mid-Hudson	2319719	2022-03-20	Former VOC Omicron GRA (B.1.1.529+BA.*) first detected in Botswana/Hong Kong/South Africa	GRA	BA.2.7	1	Other
Mid-Hudson	2319719	2022-06-05	Former VOC Omicron GRA (B.1.1.529+BA.*) first detected in Botswana/Hong Kong/South Africa	GRA	BA.2.7	1	Other
Mohawk Valley	486158	2022-04-17	Former VOC Omicron GRA (B.1.1.529+BA.*) first detected in Botswana/Hong Kong/South Africa	GRA	BA.2.7	1	Other
New York City	8419316	2022-02-13	Former VOC Omicron GRA (B.1.1.529+BA.*) first detected in Botswana/Hong Kong/South Africa	GRA	BA.2.7	1	Other
New York City	8419316	2022-02-27	Former VOC Omicron GRA (B.1.1.529+BA.*) first detected in Botswana/Hong Kong/South Africa	GRA	BA.2.7	4	Other
New York City	8419316	2022-03-06	Former VOC Omicron GRA (B.1.1.529+BA.*) first detected in Botswana/Hong Kong/South Africa	GRA	BA.2.7	15	Other
New York City	8419316	2022-03-13	Former VOC Omicron GRA (B.1.1.529+BA.*) first detected in Botswana/Hong Kong/South Africa	GRA	BA.2.7	10	Other
New York City	8419316	2022-03-20	Former VOC Omicron GRA (B.1.1.529+BA.*) first detected in Botswana/Hong Kong/South Africa	GRA	BA.2.7	19	Other
New York City	8419316	2022-03-27	Former VOC Omicron GRA (B.1.1.529+BA.*) first detected in Botswana/Hong Kong/South Africa	GRA	BA.2.7	35	Other
New York City	8419316	2022-04-03	Former VOC Omicron GRA (B.1.1.529+BA.*) first detected in Botswana/Hong Kong/South Africa	GRA	BA.2.7	32	Other
New York City	8419316	2022-04-10	Former VOC Omicron GRA (B.1.1.529+BA.*) first detected in Botswana/Hong Kong/South Africa	GRA	BA.2.7	40	Other
New York City	8419316	2022-04-17	Former VOC Omicron GRA (B.1.1.529+BA.*) first detected in Botswana/Hong Kong/South Africa	GRA	BA.2.7	17	Other
New York City	8419316	2022-04-24	Former VOC Omicron GRA (B.1.1.529+BA.*) first detected in Botswana/Hong Kong/South Africa	GRA	BA.2.7	25	Other
New York City	8419316	2022-05-01	Former VOC Omicron GRA (B.1.1.529+BA.*) first detected in Botswana/Hong Kong/South Africa	GRA	BA.2.7	22	Other
New York City	8419316	2022-05-08	Former VOC Omicron GRA (B.1.1.529+BA.*) first detected in Botswana/Hong Kong/South Africa	GRA	BA.2.7	28	Other
New York City	8419316	2022-05-15	Former VOC Omicron GRA (B.1.1.529+BA.*) first detected in Botswana/Hong Kong/South Africa	GRA	BA.2.7	25	Other
New York City	8419316	2022-05-22	Former VOC Omicron GRA (B.1.1.529+BA.*) first detected in Botswana/Hong Kong/South Africa	GR	BA.2.7	1	Other
New York City	8419316	2022-05-22	Former VOC Omicron GRA (B.1.1.529+BA.*) first detected in Botswana/Hong Kong/South Africa	GRA	BA.2.7	21	Other
New York City	8419316	2022-05-29	Former VOC Omicron GRA (B.1.1.529+BA.*) first detected in Botswana/Hong Kong/South Africa	GRA	BA.2.7	7	Other
New York City	8419316	2022-06-12	Former VOC Omicron GRA (B.1.1.529+BA.*) first detected in Botswana/Hong Kong/South Africa	GRA	BA.2.7	1	Other
New York City	8419316	2022-06-19	Former VOC Omicron GRA (B.1.1.529+BA.*) first detected in Botswana/Hong Kong/South Africa	GRA	BA.2.7	1	Other
New York City	8419316	2022-06-26	Former VOC Omicron GRA (B.1.1.529+BA.*) first detected in Botswana/Hong Kong/South Africa	GRA	BA.2.7	1	Other
Southern Tier	636657	2022-04-10	Former VOC Omicron GRA (B.1.1.529+BA.*) first detected in Botswana/Hong Kong/South Africa	GRA	BA.2.7	1	Other
Southern Tier	636657	2022-04-24	Former VOC Omicron GRA (B.1.1.529+BA.*) first detected in Botswana/Hong Kong/South Africa	GRA	BA.2.7	1	Other
Western New York	1382480	2022-04-10	Former VOC Omicron GRA (B.1.1.529+BA.*) first detected in Botswana/Hong Kong/South Africa	GRA	BA.2.7	2	Other
[truncated: 8,072 more rows]

## Sheet: WNY
Pango.lineage	Variant	2022-1	2022-2	2022-3	2022-4	2022-5	2022-6	2022-7	2022-8	2022-9	2022-10	2022-11	2022-12
AY.100	VOC Delta GK (B.1.617.2+AY.*)	4
AY.103	VOC Delta GK (B.1.617.2+AY.*)	38
AY.117	VOC Delta GK (B.1.617.2+AY.*)	1
AY.118	VOC Delta GK (B.1.617.2+AY.*)	1
AY.119	VOC Delta GK (B.1.617.2+AY.*)	2
AY.122	VOC Delta GK (B.1.617.2+AY.*)	1
AY.25	VOC Delta GK (B.1.617.2+AY.*)	9	1	1
AY.25.1	VOC Delta GK (B.1.617.2+AY.*)	1
AY.3	VOC Delta GK (B.1.617.2+AY.*)	6
AY.39	VOC Delta GK (B.1.617.2+AY.*)	2
AY.39.1	VOC Delta GK (B.1.617.2+AY.*)	1
AY.4	VOC Delta GK (B.1.617.2+AY.*)	2
AY.43	VOC Delta GK (B.1.617.2+AY.*)	1
AY.44	VOC Delta GK (B.1.617.2+AY.*)	3
BA.1.1.10	VOC Omicron GRA (B.1.1.529+BA.*)	5		1
BA.1.1.14	VOC Omicron GRA (B.1.1.529+BA.*)	19	4	1
BA.1.1.16	VOC Omicron GRA (B.1.1.529+BA.*)	4	1
BA.1.1.2	VOC Omicron GRA (B.1.1.529+BA.*)	11	1	1
BA.1.1.3	VOC Omicron GRA (B.1.1.529+BA.*)	5	1
BA.1.1.4	VOC Omicron GRA (B.1.1.529+BA.*)	1
BA.1.1.7	VOC Omicron GRA (B.1.1.529+BA.*)	2
BA.1.1.8	VOC Omicron GRA (B.1.1.529+BA.*)	10	4
BA.1.1.9	VOC Omicron GRA (B.1.1.529+BA.*)	1
BA.1.20	VOC Omicron GRA (B.1.1.529+BA.*)	14	2
BA.1.6	VOC Omicron GRA (B.1.1.529+BA.*)	2
BA.2.1	VOC Omicron GRA (B.1.1.529+BA.*)				1
BA.2.10	VOC Omicron GRA (B.1.1.529+BA.*)		1	2	2	1
BA.2.12	VOC Omicron GRA (B.1.1.529+BA.*)					2
BA.2.13	VOC Omicron GRA (B.1.1.529+BA.*)					1
BA.2.18	VOC Omicron GRA (B.1.1.529+BA.*)					2	2
BA.2.20	VOC Omicron GRA (B.1.1.529+BA.*)				2
BA.2.21	VOC Omicron GRA (B.1.1.529+BA.*)				1
BA.2.23	VOC Omicron GRA (B.1.1.529+BA.*)				1
BA.2.26	VOC Omicron GRA (B.1.1.529+BA.*)			7	5
BA.2.3.12	VOC Omicron GRA (B.1.1.529+BA.*)						1
BA.2.3.2	VOC Omicron GRA (B.1.1.529+BA.*)				1
BA.2.3.4	VOC Omicron GRA (B.1.1.529+BA.*)			2	5
BA.2.31	VOC Omicron GRA (B.1.1.529+BA.*)					1
BA.2.37	VOC Omicron GRA (B.1.1.529+BA.*)					1
BA.2.47	VOC Omicron GRA (B.1.1.529+BA.*)						1
BA.2.48	VOC Omicron GRA (B.1.1.529+BA.*)					1
BA.2.5	VOC Omicron GRA (B.1.1.529+BA.*)			1
BA.2.7	VOC Omicron GRA (B.1.1.529+BA.*)				4	4
BA.2.73	VOC Omicron GRA (B.1.1.529+BA.*)					1
BA.2.75	VUM GRA (BA.2.75+BA.2.75.*)							1	1
BA.2.75.2	VUM GRA (BA.2.75+BA.2.75.*)									2	8	1
BA.2.75.5	VUM GRA (BA.2.75+BA.2.75.*)												1
BA.2.9.7	VOC Omicron GRA (B.1.1.529+BA.*)					1
BA.4.6.2	VOC Omicron GRA (B.1.1.529+BA.*)										1	2
BA.5.1.10	VOC Omicron GRA (B.1.1.529+BA.*)						1	7	15	6	4
BA.5.1.12	VOC Omicron GRA (B.1.1.529+BA.*)											1
BA.5.1.15	VOC Omicron GRA (B.1.1.529+BA.*)								1	4	2
BA.5.1.18	VOC Omicron GRA (B.1.1.529+BA.*)									2	1		5
BA.5.1.19	VOC Omicron GRA (B.1.1.529+BA.*)										1
BA.5.1.2	VOC Omicron GRA (B.1.1.529+BA.*)							2	4	1	4
BA.5.1.23	VOC Omicron GRA (B.1.1.529+BA.*)							2	2		1
BA.5.1.24	VOC Omicron GRA (B.1.1.529+BA.*)							1	3	2	1	1
BA.5.1.25	VOC Omicron GRA (B.1.1.529+BA.*)						1		2	3
BA.5.1.26	VOC Omicron GRA (B.1.1.529+BA.*)												1
BA.5.1.27	VOC Omicron GRA (B.1.1.529+BA.*)											1	1
BA.5.1.3	VOC Omicron GRA (B.1.1.529+BA.*)							1	5			2
BA.5.1.31	VOC Omicron GRA (B.1.1.529+BA.*)									1	1	2	1
BA.5.1.33	VOC Omicron GRA (B.1.1.529+BA.*)								4	2	11	2
BA.5.1.6	VOC Omicron GRA (B.1.1.529+BA.*)								1	1	1
BA.5.1.7	VOC Omicron GRA (B.1.1.529+BA.*)									3
BA.5.10	VOC Omicron GRA (B.1.1.529+BA.*)												1
BA.5.2.13	VOC Omicron GRA (B.1.1.529+BA.*)									1	1
BA.5.2.16	VOC Omicron GRA (B.1.1.529+BA.*)										2
BA.5.2.19	VOC Omicron GRA (B.1.1.529+BA.*)								1
BA.5.2.2	VOC Omicron GRA (B.1.1.529+BA.*)							1			1
BA.5.2.22	VOC Omicron GRA (B.1.1.529+BA.*)										1	1	4
BA.5.2.25	VOC Omicron GRA (B.1.1.529+BA.*)												1
BA.5.2.26	VOC Omicron GRA (B.1.1.529+BA.*)												1
BA.5.2.28	VOC Omicron GRA (B.1.1.529+BA.*)							1
BA.5.2.3	VOC Omicron GRA (B.1.1.529+BA.*)									1	1	1
BA.5.2.31	VOC Omicron GRA (B.1.1.529+BA.*)								3	3	1
BA.5.2.33	VOC Omicron GRA (B.1.1.529+BA.*)								1
BA.5.2.34	VOC Omicron GRA (B.1.1.529+BA.*)											1	4
BA.5.2.36	VOC Omicron GRA (B.1.1.529+BA.*)								2
BA.5.2.39	VOC Omicron GRA (B.1.1.529+BA.*)									2			1
BA.5.2.53	VOC Omicron GRA (B.1.1.529+BA.*)								1		3
BA.5.2.57	VOC Omicron GRA (B.1.1.529+BA.*)										3	2
BA.5.2.6	VOC Omicron GRA (B.1.1.529+BA.*)							1			2		2
BA.5.2.60	VOC Omicron GRA (B.1.1.529+BA.*)											1
BA.5.2.61	VOC Omicron GRA (B.1.1.529+BA.*)											1
BA.5.2.7	VOC Omicron GRA (B.1.1.529+BA.*)								2
BA.5.2.8	VOC Omicron GRA (B.1.1.529+BA.*)				1			1
BA.5.3.1	VOC Omicron GRA (B.1.1.529+BA.*)								1
BA.5.3.2	VOC Omicron GRA (B.1.1.529+BA.*)								2		1
BA.5.5.1	VOC Omicron GRA (B.1.1.529+BA.*)									3	4
BA.5.6.2	VOC Omicron GRA (B.1.1.529+BA.*)							2	2
BA.5.9	VOC Omicron GRA (B.1.1.529+BA.*)									7
BE.1.1.1	VOC Omicron GRA (B.1.1.529+BA.*)										1		1
BE.1.1.2	VOC Omicron GRA (B.1.1.529+BA.*)								1
BE.1.2	VOC Omicron GRA (B.1.1.529+BA.*)									3
BE.1.2.1	VOC Omicron GRA (B.1.1.529+BA.*)												1
BE.1.4	VOC Omicron GRA (B.1.1.529+BA.*)										2
BE.11	VOC Omicron GRA (B.1.1.529+BA.*)						1
BE.2	VOC Omicron GRA (B.1.1.529+BA.*)								1
BE.4.1	VOC Omicron GRA (B.1.1.529+BA.*)										1
BF.1	VOC Omicron GRA (B.1.1.529+BA.*)								2
BF.11	VOC Omicron GRA (B.1.1.529+BA.*)	1							3	2	6	7	6
BF.12	VOC Omicron GRA (B.1.1.529+BA.*)							1
BF.13	VOC Omicron GRA (B.1.1.529+BA.*)									2	6	4
BF.14	VOC Omicron GRA (B.1.1.529+BA.*)										1
BF.25	VOC Omicron GRA (B.1.1.529+BA.*)							1		4	1
BF.29	VOC Omicron GRA (B.1.1.529+BA.*)						1
BF.3	VOC Omicron GRA (B.1.1.529+BA.*)								1	1	4
BF.3.1	VOC Omicron GRA (B.1.1.529+BA.*)											1
BF.32	VOC Omicron GRA (B.1.1.529+BA.*)												1
BF.39	VOC Omicron GRA (B.1.1.529+BA.*)								1
BF.4	VOC Omicron GRA (B.1.1.529+BA.*)								3	3			1
BF.41.1	VOC Omicron GRA (B.1.1.529+BA.*)											1
BF.7	VOC Omicron GRA (B.1.1.529+BA.*)							1	5	15	15	17	12
BF.7.10	VOC Omicron GRA (B.1.1.529+BA.*)											1
BF.7.16	VOC Omicron GRA (B.1.1.529+BA.*)												1
BF.7.24	VOC Omicron GRA (B.1.1.529+BA.*)										1
BF.7.27	VOC Omicron GRA (B.1.1.529+BA.*)										2
BF.7.4	VOC Omicron GRA (B.1.1.529+BA.*)									2	8	2	5
BF.7.4.1	VOC Omicron GRA (B.1.1.529+BA.*)									3	13	2	2
BF.7.5	VOC Omicron GRA (B.1.1.529+BA.*)											1
BF.7.6	VOC Omicron GRA (B.1.1.529+BA.*)										1
BF.7.7	VOC Omicron GRA (B.1.1.529+BA.*)										1
BF.8	VOC Omicron GRA (B.1.1.529+BA.*)							1	5	3	1
BK.1	VOC Omicron GRA (B.1.1.529+BA.*)								2	1
BL.1	VUM GRA (BA.2.75+BA.2.75.*)									4
BM.1.1.3	VUM GRA (BA.2.75+BA.2.75.*)									4	4	1
BM.4.1.1	VUM GRA (BA.2.75+BA.2.75.*)											1
BN.1	VUM GRA (BA.2.75+BA.2.75.*)										1	3
BN.1.2	VUM GRA (BA.2.75+BA.2.75.*)												1
BN.1.3	VUM GRA (BA.2.75+BA.2.75.*)												1
BN.1.7	VUM GRA (BA.2.75+BA.2.75.*)												1
BN.5	VUM GRA (BA.2.75+BA.2.75.*)									1	2	1
BQ.1	VOC Omicron GRA (B.1.1.529+BA.*)										13	16	15
BQ.1.1.1	VOC Omicron GRA (B.1.1.529+BA.*)												1
BQ.1.1.18	VOC Omicron GRA (B.1.1.529+BA.*)											1	2
BQ.1.1.2	VOC Omicron GRA (B.1.1.529+BA.*)											1
BQ.1.1.23	VOC Omicron GRA (B.1.1.529+BA.*)												1
BQ.1.1.3	VOC Omicron GRA (B.1.1.529+BA.*)											5	3
BQ.1.1.36	VOC Omicron GRA (B.1.1.529+BA.*)											1
BQ.1.1.39	VOC Omicron GRA (B.1.1.529+BA.*)										1	4	3
BQ.1.1.40	VOC Omicron GRA (B.1.1.529+BA.*)											1
BQ.1.1.51	VOC Omicron GRA (B.1.1.529+BA.*)											1	1
BQ.1.1.52	VOC Omicron GRA (B.1.1.529+BA.*)											1	3
BQ.1.1.6	VOC Omicron GRA (B.1.1.529+BA.*)												2
BQ.1.1.69	VOC Omicron GRA (B.1.1.529+BA.*)											1
BQ.1.1.8	VOC Omicron GRA (B.1.1.529+BA.*)												1
BQ.1.10	VOC Omicron GRA (B.1.1.529+BA.*)												3
BQ.1.11	VOC Omicron GRA (B.1.1.529+BA.*)									1	3		4
BQ.1.12	VOC Omicron GRA (B.1.1.529+BA.*)												2
BQ.1.13	VOC Omicron GRA (B.1.1.529+BA.*)											1	5
BQ.1.13.1	VOC Omicron GRA (B.1.1.529+BA.*)												1
BQ.1.14	VOC Omicron GRA (B.1.1.529+BA.*)											2
BQ.1.2	VOC Omicron GRA (B.1.1.529+BA.*)										4	10	1
BQ.1.2.3	VOC Omicron GRA (B.1.1.529+BA.*)											1	4
BQ.1.23	VOC Omicron GRA (B.1.1.529+BA.*)												1
BQ.1.25	VOC Omicron GRA (B.1.1.529+BA.*)												4
BQ.1.25.1	VOC Omicron GRA (B.1.1.529+BA.*)											1
BQ.1.3	VOC Omicron GRA (B.1.1.529+BA.*)											5
BQ.1.3.1	VOC Omicron GRA (B.1.1.529+BA.*)												6
BQ.1.3.2	VOC Omicron GRA (B.1.1.529+BA.*)										1	1	25
BQ.1.5	VOC Omicron GRA (B.1.1.529+BA.*)											6	3
BQ.1.6	VOC Omicron GRA (B.1.1.529+BA.*)										1
BQ.1.7	VOC Omicron GRA (B.1.1.529+BA.*)								1	2	12	10	4
BQ.1.8	VOC Omicron GRA (B.1.1.529+BA.*)										5		2
BU.1	VOC Omicron GRA (B.1.1.529+BA.*)												3
BV.2	VOC Omicron GRA (B.1.1.529+BA.*)									2
BW.1.1	VOC Omicron GRA (B.1.1.529+BA.*)												1
CA.1	VUM GRA (BA.2.75+BA.2.75.*)									2
CK.1	VOC Omicron GRA (B.1.1.529+BA.*)								3			2
CK.1.3	VOC Omicron GRA (B.1.1.529+BA.*)												6
CK.1.4	VOC Omicron GRA (B.1.1.529+BA.*)												1
CK.2	VOC Omicron GRA (B.1.1.529+BA.*)								2	2
CK.2.1	VOC Omicron GRA (B.1.1.529+BA.*)											1
CK.2.1.1	VOC Omicron GRA (B.1.1.529+BA.*)											1
CM.8.1	VOC Omicron GRA (B.1.1.529+BA.*)											1
CN.2	VOC Omicron GRA (B.1.1.529+BA.*)									4	13	6	2
DB.1	VOC Omicron GRA (B.1.1.529+BA.*)								1			4
DF.1	VOC Omicron GRA (B.1.1.529+BA.*)												1
DM.1	VOC Omicron GRA (B.1.1.529+BA.*)												2
DN.1.1	VOC Omicron GRA (B.1.1.529+BA.*)											4
ED.3	VOC Omicron GRA (B.1.1.529+BA.*)												2
EE.1	VOC Omicron GRA (B.1.1.529+BA.*)												1
XAS	VOC Omicron GRA (B.1.1.529+BA.*)								2
XBB.1.5.17	VOI GRA (XBB.1.5+XBB.1.5.*)												1
XBB.1.5.31	VOI GRA (XBB.1.5+XBB.1.5.*)												1
XBB.1.5.32	VOI GRA (XBB.1.5+XBB.1.5.*)												3
XBB.1.5.9	VOI GRA (XBB.1.5+XBB.1.5.*)											2	17
XBB.1.7	VUM GRA (XBB+XBB.* excluding XBB.1.5, XBB.1.16, XBB.1.9.1, XBB.1.9.2, XBB.2.3)												1
XBB.2.8	VUM GRA (XBB+XBB.* excluding XBB.1.5, XBB.1.16, XBB.1.9.1, XBB.1.9.2, XBB.2.3)										1
XBB.3	VUM GRA (XBB+XBB.* excluding XBB.1.5, XBB.1.16, XBB.1.9.1, XBB.1.9.2, XBB.2.3)										1
XBB.4	VUM GRA (XBB+XBB.* excluding XBB.1.5, XBB.1.16, XBB.1.9.1, XBB.1.9.2, XBB.2.3)												3
XBE	VOC Omicron GRA (B.1.1.529+BA.*)										1
XZ	VOC Omicron GRA (B.1.1.529+BA.*)						1

## Sheet: NYC
Pango.lineage	Variant	2022-1	2022-2	2022-3	2022-4	2022-5	2022-6	2022-7	2022-8	2022-9	2022-10	2022-11	2022-12
AY.100	VOC Delta GK (B.1.617.2+AY.*)	22	1
AY.103	VOC Delta GK (B.1.617.2+AY.*)	64	8	5	1	2
AY.107	VOC Delta GK (B.1.617.2+AY.*)	1		1
AY.112	VOC Delta GK (B.1.617.2+AY.*)	1
AY.116.1	VOC Delta GK (B.1.617.2+AY.*)	1
AY.117	VOC Delta GK (B.1.617.2+AY.*)	1
AY.118	VOC Delta GK (B.1.617.2+AY.*)	1
AY.119	VOC Delta GK (B.1.617.2+AY.*)	6
AY.119.2	VOC Delta GK (B.1.617.2+AY.*)	1
AY.120.2	VOC Delta GK (B.1.617.2+AY.*)	1
AY.121	VOC Delta GK (B.1.617.2+AY.*)	3
AY.127	VOC Delta GK (B.1.617.2+AY.*)	3
AY.129	VOC Delta GK (B.1.617.2+AY.*)	1
AY.20	VOC Delta GK (B.1.617.2+AY.*)			1
AY.23	VOC Delta GK (B.1.617.2+AY.*)	1
AY.25	VOC Delta GK (B.1.617.2+AY.*)	8
AY.25.1	VOC Delta GK (B.1.617.2+AY.*)	11
AY.3	VOC Delta GK (B.1.617.2+AY.*)	21	4
AY.3.3	VOC Delta GK (B.1.617.2+AY.*)	2
AY.33	VOC Delta GK (B.1.617.2+AY.*)	1
AY.34	VOC Delta GK (B.1.617.2+AY.*)	1
AY.39.1	VOC Delta GK (B.1.617.2+AY.*)	1
AY.39.2	VOC Delta GK (B.1.617.2+AY.*)	1
AY.4	VOC Delta GK (B.1.617.2+AY.*)	4
AY.43	VOC Delta GK (B.1.617.2+AY.*)	7
AY.43.3	VOC Delta GK (B.1.617.2+AY.*)	1
AY.44	VOC Delta GK (B.1.617.2+AY.*)	27
AY.46.1	VOC Delta GK (B.1.617.2+AY.*)	1
AY.47	VOC Delta GK (B.1.617.2+AY.*)	3
AY.5.3	VOC Delta GK (B.1.617.2+AY.*)	1
B		1
B.1.1.529	VOC Omicron GRA (B.1.1.529+BA.*)	2	2	1	4							1
B.1.1.7	VOC Alpha GRY (B.1.1.7+Q.*)		1	1
B.1.2					1
B.1.351	VOC Beta GH/501Y.V2 (B.1.351+B.1.351.2+B.1.351.3)			1
B.1.617.2	VOC Delta GK (B.1.617.2+AY.*)	4		1
B.1.637.1		2
BA.1.1.1	VOC Omicron GRA (B.1.1.529+BA.*)	25	19	8	1	1						1
BA.1.1.10	VOC Omicron GRA (B.1.1.529+BA.*)	27	4	2
BA.1.1.11	VOC Omicron GRA (B.1.1.529+BA.*)	1	2	6
BA.1.1.13	VOC Omicron GRA (B.1.1.529+BA.*)	2	1	1
BA.1.1.14	VOC Omicron GRA (B.1.1.529+BA.*)	148	28	9	2
BA.1.1.15	VOC Omicron GRA (B.1.1.529+BA.*)	9	4	6
BA.1.1.16	VOC Omicron GRA (B.1.1.529+BA.*)	16	9	2	3	1
BA.1.1.17	VOC Omicron GRA (B.1.1.529+BA.*)	6
BA.1.1.2	VOC Omicron GRA (B.1.1.529+BA.*)	44	14	3
BA.1.1.3	VOC Omicron GRA (B.1.1.529+BA.*)			1
BA.1.1.4	VOC Omicron GRA (B.1.1.529+BA.*)	1
BA.1.1.6	VOC Omicron GRA (B.1.1.529+BA.*)	1	2
BA.1.1.8	VOC Omicron GRA (B.1.1.529+BA.*)	6		1
BA.1.1.9	VOC Omicron GRA (B.1.1.529+BA.*)	1
BA.1.10	VOC Omicron GRA (B.1.1.529+BA.*)		3
BA.1.12	VOC Omicron GRA (B.1.1.529+BA.*)	1
BA.1.13	VOC Omicron GRA (B.1.1.529+BA.*)	19	1
BA.1.14	VOC Omicron GRA (B.1.1.529+BA.*)	7
BA.1.14.1	VOC Omicron GRA (B.1.1.529+BA.*)	4	4
BA.1.15.1	VOC Omicron GRA (B.1.1.529+BA.*)	16	3
BA.1.15.2	VOC Omicron GRA (B.1.1.529+BA.*)	6	11	8
BA.1.15.3	VOC Omicron GRA (B.1.1.529+BA.*)	2
BA.1.17	VOC Omicron GRA (B.1.1.529+BA.*)	224	16	4	2
BA.1.17.1	VOC Omicron GRA (B.1.1.529+BA.*)	1
BA.1.18	VOC Omicron GRA (B.1.1.529+BA.*)	507	96	29	4
BA.1.19	VOC Omicron GRA (B.1.1.529+BA.*)	13	3
BA.1.20	VOC Omicron GRA (B.1.1.529+BA.*)	262	50	10							1
BA.1.21	VOC Omicron GRA (B.1.1.529+BA.*)	4	3
BA.1.21.1	VOC Omicron GRA (B.1.1.529+BA.*)	1
BA.1.23	VOC Omicron GRA (B.1.1.529+BA.*)		3	4	4	1			1
BA.1.3	VOC Omicron GRA (B.1.1.529+BA.*)	1
BA.1.4	VOC Omicron GRA (B.1.1.529+BA.*)	2	1
BA.1.5	VOC Omicron GRA (B.1.1.529+BA.*)	2	1
BA.1.6	VOC Omicron GRA (B.1.1.529+BA.*)	12		2
BA.1.7	VOC Omicron GRA (B.1.1.529+BA.*)	1
BA.1.9	VOC Omicron GRA (B.1.1.529+BA.*)	3	1
BA.2.1	VOC Omicron GRA (B.1.1.529+BA.*)			18	65	30	5	1	1
BA.2.10	VOC Omicron GRA (B.1.1.529+BA.*)	27	76	230	170	72	2	1			1	1
BA.2.10.1	VOC Omicron GRA (B.1.1.529+BA.*)	2	10	23	10	8		1			3	2	1
BA.2.10.3	VOC Omicron GRA (B.1.1.529+BA.*)		2	1	1	1
BA.2.12	VOC Omicron GRA (B.1.1.529+BA.*)		3	23	70	67	11	1		1
BA.2.12.2	VOC Omicron GRA (B.1.1.529+BA.*)							1
BA.2.13	VOC Omicron GRA (B.1.1.529+BA.*)			3	21	63	43	5
BA.2.13.1	VOC Omicron GRA (B.1.1.529+BA.*)					23	23	8
BA.2.14	VOC Omicron GRA (B.1.1.529+BA.*)			7	10	4
BA.2.15	VOC Omicron GRA (B.1.1.529+BA.*)				1
BA.2.17	VOC Omicron GRA (B.1.1.529+BA.*)				1
BA.2.18	VOC Omicron GRA (B.1.1.529+BA.*)			2	22	84	57	12	1
BA.2.2	VOC Omicron GRA (B.1.1.529+BA.*)		3	4					1
BA.2.2.1	VOC Omicron GRA (B.1.1.529+BA.*)	70	3	1
BA.2.20	VOC Omicron GRA (B.1.1.529+BA.*)			10	27	25	3
BA.2.21	VOC Omicron GRA (B.1.1.529+BA.*)		2	14	86	39	2
BA.2.22	VOC Omicron GRA (B.1.1.529+BA.*)				2	3
BA.2.23	VOC Omicron GRA (B.1.1.529+BA.*)		1	12	66	108	15	1
BA.2.23.1	VOC Omicron GRA (B.1.1.529+BA.*)				3	10	1
BA.2.24	VOC Omicron GRA (B.1.1.529+BA.*)				1
BA.2.26	VOC Omicron GRA (B.1.1.529+BA.*)		7	229	179	41
BA.2.27	VOC Omicron GRA (B.1.1.529+BA.*)	1				1
BA.2.28	VOC Omicron GRA (B.1.1.529+BA.*)				6	8	4
BA.2.29	VOC Omicron GRA (B.1.1.529+BA.*)					1
BA.2.3.1	VOC Omicron GRA (B.1.1.529+BA.*)					1
BA.2.3.10	VOC Omicron GRA (B.1.1.529+BA.*)			7	54	11	1	2
BA.2.3.12	VOC Omicron GRA (B.1.1.529+BA.*)			1	1	2
BA.2.3.14	VOC Omicron GRA (B.1.1.529+BA.*)			4		2	1
BA.2.3.15	VOC Omicron GRA (B.1.1.529+BA.*)			1	13	4	1
BA.2.3.16	VOC Omicron GRA (B.1.1.529+BA.*)					2
BA.2.3.17	VOC Omicron GRA (B.1.1.529+BA.*)	2	18	9	9	16	4
BA.2.3.2	VOC Omicron GRA (B.1.1.529+BA.*)			4	2	3	4	1
BA.2.3.20	VOC Omicron GRA (B.1.1.529+BA.*)									1	15	8
BA.2.3.4	VOC Omicron GRA (B.1.1.529+BA.*)			22	19	6
BA.2.3.5	VOC Omicron GRA (B.1.1.529+BA.*)			2	1
BA.2.3.6	VOC Omicron GRA (B.1.1.529+BA.*)			1	6	8		1
BA.2.3.7	VOC Omicron GRA (B.1.1.529+BA.*)					2	2
BA.2.3.9	VOC Omicron GRA (B.1.1.529+BA.*)			1	2	2	1
BA.2.30	VOC Omicron GRA (B.1.1.529+BA.*)				4	5	1
BA.2.31	VOC Omicron GRA (B.1.1.529+BA.*)			2	8	22	1
BA.2.31.1	VOC Omicron GRA (B.1.1.529+BA.*)					1		1
BA.2.32	VOC Omicron GRA (B.1.1.529+BA.*)			4	17	10
BA.2.33	VOC Omicron GRA (B.1.1.529+BA.*)			1	2		1
BA.2.34	VOC Omicron GRA (B.1.1.529+BA.*)					1
BA.2.35	VOC Omicron GRA (B.1.1.529+BA.*)					3		1
BA.2.36	VOC Omicron GRA (B.1.1.529+BA.*)			5	19	32	2	5
BA.2.37	VOC Omicron GRA (B.1.1.529+BA.*)	1	1	34	43	32	1
BA.2.38	VOC Omicron GRA (B.1.1.529+BA.*)				3	14	13	10
BA.2.38.1	VOC Omicron GRA (B.1.1.529+BA.*)							1
BA.2.38.2	VOC Omicron GRA (B.1.1.529+BA.*)							1
BA.2.39	VOC Omicron GRA (B.1.1.529+BA.*)				1
BA.2.4	VOC Omicron GRA (B.1.1.529+BA.*)			7	4	3
BA.2.40	VOC Omicron GRA (B.1.1.529+BA.*)						1
BA.2.40.1	VOC Omicron GRA (B.1.1.529+BA.*)			4	27	47	13	7
BA.2.41	VOC Omicron GRA (B.1.1.529+BA.*)				2	10	4
BA.2.42	VOC Omicron GRA (B.1.1.529+BA.*)					3	1
BA.2.43	VOC Omicron GRA (B.1.1.529+BA.*)				1	13	1
BA.2.44	VOC Omicron GRA (B.1.1.529+BA.*)				3	3
BA.2.45	VOC Omicron GRA (B.1.1.529+BA.*)						5
BA.2.47	VOC Omicron GRA (B.1.1.529+BA.*)				2		1	1
BA.2.48	VOC Omicron GRA (B.1.1.529+BA.*)			2	151	314	60	11
BA.2.49	VOC Omicron GRA (B.1.1.529+BA.*)				2	1	1
BA.2.5	VOC Omicron GRA (B.1.1.529+BA.*)	1	14	49	42	23	1
BA.2.50	VOC Omicron GRA (B.1.1.529+BA.*)							1
BA.2.51	VOC Omicron GRA (B.1.1.529+BA.*)		1
BA.2.52	VOC Omicron GRA (B.1.1.529+BA.*)				5	18	10	1
BA.2.53	VOC Omicron GRA (B.1.1.529+BA.*)				1
BA.2.54	VOC Omicron GRA (B.1.1.529+BA.*)						3
BA.2.55	VOC Omicron GRA (B.1.1.529+BA.*)				1	11	4	1
BA.2.56	VOC Omicron GRA (B.1.1.529+BA.*)			2	2	30	27	12
BA.2.57	VOC Omicron GRA (B.1.1.529+BA.*)					1
BA.2.58	VOC Omicron GRA (B.1.1.529+BA.*)					1
BA.2.59	VOC Omicron GRA (B.1.1.529+BA.*)				1	3
BA.2.6	VOC Omicron GRA (B.1.1.529+BA.*)			3	26	16
BA.2.60	VOC Omicron GRA (B.1.1.529+BA.*)				1		2
BA.2.61	VOC Omicron GRA (B.1.1.529+BA.*)					5	5
BA.2.62	VOC Omicron GRA (B.1.1.529+BA.*)				1
BA.2.63	VOC Omicron GRA (B.1.1.529+BA.*)			1	7
BA.2.64	VOC Omicron GRA (B.1.1.529+BA.*)			1	6	10
BA.2.66	VOC Omicron GRA (B.1.1.529+BA.*)						1
BA.2.68	VOC Omicron GRA (B.1.1.529+BA.*)			7	8	11	2
BA.2.7	VOC Omicron GRA (B.1.1.529+BA.*)		5	79	114	104	3
BA.2.70	VOC Omicron GRA (B.1.1.529+BA.*)				1
BA.2.71	VOC Omicron GRA (B.1.1.529+BA.*)					8
BA.2.72	VOC Omicron GRA (B.1.1.529+BA.*)			1	4	9	4
BA.2.73	VOC Omicron GRA (B.1.1.529+BA.*)				11	10	1
BA.2.74	VOC Omicron GRA (B.1.1.529+BA.*)						5	3
BA.2.75	VUM GRA (BA.2.75+BA.2.75.*)						1	8	4	2	6	1
BA.2.75.1	VUM GRA (BA.2.75+BA.2.75.*)							4	6	22
BA.2.75.2	VUM GRA (BA.2.75+BA.2.75.*)								11	18	40	9	3
BA.2.75.3	VUM GRA (BA.2.75+BA.2.75.*)							5	1	3
BA.2.75.5	VUM GRA (BA.2.75+BA.2.75.*)								5	12	4	2	4
BA.2.75.6	VUM GRA (BA.2.75+BA.2.75.*)									4	1
BA.2.75.7	VUM GRA (BA.2.75+BA.2.75.*)									1
BA.2.76	VOC Omicron GRA (B.1.1.529+BA.*)					3	15	33	10
BA.2.76.1	VOC Omicron GRA (B.1.1.529+BA.*)							1
BA.2.78	VOC Omicron GRA (B.1.1.529+BA.*)					1
BA.2.79	VOC Omicron GRA (B.1.1.529+BA.*)					2	3
BA.2.8	VOC Omicron GRA (B.1.1.529+BA.*)			5	10	5	1
BA.2.81	VOC Omicron GRA (B.1.1.529+BA.*)					9	4
BA.2.9.2	VOC Omicron GRA (B.1.1.529+BA.*)		86	88	39	22	5
BA.2.9.3	VOC Omicron GRA (B.1.1.529+BA.*)			1	2	11	3			1
BA.2.9.5	VOC Omicron GRA (B.1.1.529+BA.*)				2	3	3
BA.2.9.7	VOC Omicron GRA (B.1.1.529+BA.*)				1	7	6	5
BA.3	VOC Omicron GRA (B.1.1.529+BA.*)				1
BA.3.1	VOC Omicron GRA (B.1.1.529+BA.*)			5
BA.4.1.10	VOC Omicron GRA (B.1.1.529+BA.*)										2
BA.4.3	VOC Omicron GRA (B.1.1.529+BA.*)							4
BA.4.6.2	VOC Omicron GRA (B.1.1.529+BA.*)									14	10	3
BA.4.6.3	VOC Omicron GRA (B.1.1.529+BA.*)										1	3	1
BA.5.1.10	VOC Omicron GRA (B.1.1.529+BA.*)						28	118	59	71	30	8	5
BA.5.1.12	VOC Omicron GRA (B.1.1.529+BA.*)						11	20	34	38	39	21	1
BA.5.1.15	VOC Omicron GRA (B.1.1.529+BA.*)					2	3	14	20	8	1
BA.5.1.17	VOC Omicron GRA (B.1.1.529+BA.*)						2	4	7	3	2	3
BA.5.1.18	VOC Omicron GRA (B.1.1.529+BA.*)							3	10	47	39	14	9
BA.5.1.19	VOC Omicron GRA (B.1.1.529+BA.*)						2	3	1	3
BA.5.1.2	VOC Omicron GRA (B.1.1.529+BA.*)						36	111	98	40	21	2
BA.5.1.20	VOC Omicron GRA (B.1.1.529+BA.*)								3
BA.5.1.21	VOC Omicron GRA (B.1.1.529+BA.*)						1	4	6	15	4
BA.5.1.23	VOC Omicron GRA (B.1.1.529+BA.*)					3	37	98	41	43	25	5	1
BA.5.1.24	VOC Omicron GRA (B.1.1.529+BA.*)						17	32	31	10	3
BA.5.1.25	VOC Omicron GRA (B.1.1.529+BA.*)					2	24	80	47	29	7	1
BA.5.1.26	VOC Omicron GRA (B.1.1.529+BA.*)										1
BA.5.1.27	VOC Omicron GRA (B.1.1.529+BA.*)									6	11	5	7
BA.5.1.28	VOC Omicron GRA (B.1.1.529+BA.*)							2	1		2
BA.5.1.3	VOC Omicron GRA (B.1.1.529+BA.*)						19	48	37	14	5	4
BA.5.1.33	VOC Omicron GRA (B.1.1.529+BA.*)								1	2	6	5	4
BA.5.1.34	VOC Omicron GRA (B.1.1.529+BA.*)							3	3
BA.5.1.35	VOC Omicron GRA (B.1.1.529+BA.*)						1	10	9	3
BA.5.1.37	VOC Omicron GRA (B.1.1.529+BA.*)											1
BA.5.1.4	VOC Omicron GRA (B.1.1.529+BA.*)						2	7		2		1
BA.5.1.5	VOC Omicron GRA (B.1.1.529+BA.*)						1	28	32	42	39	6	1
BA.5.1.6	VOC Omicron GRA (B.1.1.529+BA.*)						9	32	26	6	2	1
BA.5.1.7	VOC Omicron GRA (B.1.1.529+BA.*)						1	18	16	8	8	2
BA.5.1.8	VOC Omicron GRA (B.1.1.529+BA.*)							1		1
BA.5.1.9	VOC Omicron GRA (B.1.1.529+BA.*)							5		1
BA.5.10	VOC Omicron GRA (B.1.1.529+BA.*)							4	8	6	5
BA.5.10.1	VOC Omicron GRA (B.1.1.529+BA.*)								1
BA.5.11	VOC Omicron GRA (B.1.1.529+BA.*)										1		1
BA.5.2.10	VOC Omicron GRA (B.1.1.529+BA.*)								1
BA.5.2.13	VOC Omicron GRA (B.1.1.529+BA.*)									1	9	10
BA.5.2.14	VOC Omicron GRA (B.1.1.529+BA.*)									2	3	3
BA.5.2.16	VOC Omicron GRA (B.1.1.529+BA.*)						7	9	8	10	2	1
BA.5.2.18	VOC Omicron GRA (B.1.1.529+BA.*)							3	8	19	15	1	1
BA.5.2.19	VOC Omicron GRA (B.1.1.529+BA.*)							5	8	5	7	2
BA.5.2.2	VOC Omicron GRA (B.1.1.529+BA.*)					2	15	34	14	6	1
BA.5.2.22	VOC Omicron GRA (B.1.1.529+BA.*)							15	21	21	10	1	2
BA.5.2.23	VOC Omicron GRA (B.1.1.529+BA.*)									19	32	28	9
BA.5.2.24	VOC Omicron GRA (B.1.1.529+BA.*)							2	5	4	1
BA.5.2.25	VOC Omicron GRA (B.1.1.529+BA.*)								5	5	6	1
BA.5.2.26	VOC Omicron GRA (B.1.1.529+BA.*)							2	2	4	7	1	2
BA.5.2.27	VOC Omicron GRA (B.1.1.529+BA.*)					1	26	40	30	24	6
BA.5.2.28	VOC Omicron GRA (B.1.1.529+BA.*)					2	2	8	19	23	25	1
BA.5.2.3	VOC Omicron GRA (B.1.1.529+BA.*)					1	7	28	23	22	14
BA.5.2.30	VOC Omicron GRA (B.1.1.529+BA.*)							3	2
BA.5.2.31	VOC Omicron GRA (B.1.1.529+BA.*)						1	13	7	20	4	4
BA.5.2.32	VOC Omicron GRA (B.1.1.529+BA.*)										5	2	2
BA.5.2.33	VOC Omicron GRA (B.1.1.529+BA.*)						1	10	5	8	1
BA.5.2.34	VOC Omicron GRA (B.1.1.529+BA.*)								1	17	33	22	11
BA.5.2.35	VOC Omicron GRA (B.1.1.529+BA.*)									2	15	8	4
BA.5.2.36	VOC Omicron GRA (B.1.1.529+BA.*)								6	4		2
BA.5.2.37	VOC Omicron GRA (B.1.1.529+BA.*)									2
BA.5.2.38	VOC Omicron GRA (B.1.1.529+BA.*)									2	1
BA.5.2.39	VOC Omicron GRA (B.1.1.529+BA.*)									1	1	1
BA.5.2.4	VOC Omicron GRA (B.1.1.529+BA.*)							4		1
BA.5.2.41	VOC Omicron GRA (B.1.1.529+BA.*)									1
BA.5.2.44	VOC Omicron GRA (B.1.1.529+BA.*)						6	24	11	2	3
BA.5.2.47	VOC Omicron GRA (B.1.1.529+BA.*)										2	3	2
BA.5.2.51	VOC Omicron GRA (B.1.1.529+BA.*)										1
BA.5.2.52	VOC Omicron GRA (B.1.1.529+BA.*)										1	3	1
BA.5.2.53	VOC Omicron GRA (B.1.1.529+BA.*)							3	1	11	1
BA.5.2.54	VOC Omicron GRA (B.1.1.529+BA.*)									1	2
BA.5.2.56	VOC Omicron GRA (B.1.1.529+BA.*)									4	2
BA.5.2.57	VOC Omicron GRA (B.1.1.529+BA.*)								2	14	6	3	2
BA.5.2.58	VOC Omicron GRA (B.1.1.529+BA.*)
BA.5.2.59	VOC Omicron GRA (B.1.1.529+BA.*)						1			2		5
BA.5.2.6	VOC Omicron GRA (B.1.1.529+BA.*)						1	9	14	35	78	46	24
BA.5.2.60	VOC Omicron GRA (B.1.1.529+BA.*)											1	2
BA.5.2.62	VOC Omicron GRA (B.1.1.529+BA.*)							1	1		2
BA.5.2.7	VOC Omicron GRA (B.1.1.529+BA.*)								3	1	5		1
BA.5.2.8	VOC Omicron GRA (B.1.1.529+BA.*)							4	8	2	5
BA.5.3	VOC Omicron GRA (B.1.1.529+BA.*)					6	22	8	3		8	1	1
BA.5.3.1	VOC Omicron GRA (B.1.1.529+BA.*)					3	22	29	8	9	7	5	4
BA.5.3.2	VOC Omicron GRA (B.1.1.529+BA.*)				1	1	2	1
BA.5.3.3	VOC Omicron GRA (B.1.1.529+BA.*)						2	2	9	3	2
BA.5.3.5	VOC Omicron GRA (B.1.1.529+BA.*)											7
BA.5.5.1	VOC Omicron GRA (B.1.1.529+BA.*)						6	17	22	23	16	5	1
BA.5.5.3	VOC Omicron GRA (B.1.1.529+BA.*)							5	4
BA.5.6.1	VOC Omicron GRA (B.1.1.529+BA.*)							4	14	2	1
BA.5.6.2	VOC Omicron GRA (B.1.1.529+BA.*)							25	25	12	4	2	4
BA.5.6.3	VOC Omicron GRA (B.1.1.529+BA.*)									1	1
BA.5.7	VOC Omicron GRA (B.1.1.529+BA.*)									2	1
BA.5.9	VOC Omicron GRA (B.1.1.529+BA.*)							6	15	28	9	8
BD.1	VOC Omicron GRA (B.1.1.529+BA.*)				1
BE.1.1.1	VOC Omicron GRA (B.1.1.529+BA.*)							7	29	19	7	2	4
BE.1.1.2	VOC Omicron GRA (B.1.1.529+BA.*)						1	10	11	2	4	1
BE.1.2	VOC Omicron GRA (B.1.1.529+BA.*)							4	3	6	3	5
BE.1.2.1	VOC Omicron GRA (B.1.1.529+BA.*)								1	2	8	3	3
BE.1.3	VOC Omicron GRA (B.1.1.529+BA.*)					3	4	12	2	2	1
BE.1.4	VOC Omicron GRA (B.1.1.529+BA.*)					10	66	94	42	34	5	1
BE.1.4.1	VOC Omicron GRA (B.1.1.529+BA.*)						20	65	33	13	3
BE.1.4.2	VOC Omicron GRA (B.1.1.529+BA.*)							1		6	22	15	3
BE.1.4.4	VOC Omicron GRA (B.1.1.529+BA.*)								1
BE.10	VOC Omicron GRA (B.1.1.529+BA.*)										3	11	9
BE.12	VOC Omicron GRA (B.1.1.529+BA.*)					4	7	2	2
BE.2	VOC Omicron GRA (B.1.1.529+BA.*)							5	5	1	1
BE.4	VOC Omicron GRA (B.1.1.529+BA.*)						10	50	36	14	2
BE.4.1	VOC Omicron GRA (B.1.1.529+BA.*)								1	5	3	1
BE.4.1.1	VOC Omicron GRA (B.1.1.529+BA.*)									2	1	3	1
BE.4.2	VOC Omicron GRA (B.1.1.529+BA.*)									8	34	35	8
BE.5	VOC Omicron GRA (B.1.1.529+BA.*)					1	2	11	8	7	1
BE.6	VOC Omicron GRA (B.1.1.529+BA.*)									1
BE.9	VOC Omicron GRA (B.1.1.529+BA.*)											5	3
BF.1	VOC Omicron GRA (B.1.1.529+BA.*)					11	32	52	6	4	1
BF.1.1	VOC Omicron GRA (B.1.1.529+BA.*)				1	71	64	14
BF.11	VOC Omicron GRA (B.1.1.529+BA.*)						1	6	26	59	18	20	11
BF.11.1	VOC Omicron GRA (B.1.1.529+BA.*)									2	1	2
BF.11.3	VOC Omicron GRA (B.1.1.529+BA.*)											1	3
BF.11.4	VOC Omicron GRA (B.1.1.529+BA.*)									1	3	3
BF.11.5	VOC Omicron GRA (B.1.1.529+BA.*)									1	3
BF.12	VOC Omicron GRA (B.1.1.529+BA.*)						3	6	1
BF.13	VOC Omicron GRA (B.1.1.529+BA.*)						22	135	98	100	69	20
BF.14	VOC Omicron GRA (B.1.1.529+BA.*)									14	18	7	11
BF.15	VOC Omicron GRA (B.1.1.529+BA.*)									3
BF.17	VOC Omicron GRA (B.1.1.529+BA.*)							1
BF.2	VOC Omicron GRA (B.1.1.529+BA.*)							2	4	3	6	1
BF.20	VOC Omicron GRA (B.1.1.529+BA.*)							2	3
BF.23	VOC Omicron GRA (B.1.1.529+BA.*)							1	2
BF.24	VOC Omicron GRA (B.1.1.529+BA.*)							4
BF.25	VOC Omicron GRA (B.1.1.529+BA.*)							2	3	27	39	4	2
BF.29	VOC Omicron GRA (B.1.1.529+BA.*)										3
BF.3	VOC Omicron GRA (B.1.1.529+BA.*)						3	13	10	10
BF.3.1	VOC Omicron GRA (B.1.1.529+BA.*)							7	1
BF.31	VOC Omicron GRA (B.1.1.529+BA.*)								2			1
BF.31.1	VOC Omicron GRA (B.1.1.529+BA.*)										1	1
BF.32	VOC Omicron GRA (B.1.1.529+BA.*)							1	11	32	103	21	1
BF.34	VOC Omicron GRA (B.1.1.529+BA.*)									1
BF.36	VOC Omicron GRA (B.1.1.529+BA.*)						8	40	7	1	3	1
BF.38	VOC Omicron GRA (B.1.1.529+BA.*)							1		4
BF.39	VOC Omicron GRA (B.1.1.529+BA.*)						7	13	9	31	4
BF.39.1	VOC Omicron GRA (B.1.1.529+BA.*)											2	1
BF.4	VOC Omicron GRA (B.1.1.529+BA.*)					1	17	28	15	7	2	1
BF.40	VOC Omicron GRA (B.1.1.529+BA.*)							7	4	2	4	2	1
BF.41	VOC Omicron GRA (B.1.1.529+BA.*)					1		4	6
BF.41.1	VOC Omicron GRA (B.1.1.529+BA.*)											3
BF.5.5	VOC Omicron GRA (B.1.1.529+BA.*)										1
BF.6	VOC Omicron GRA (B.1.1.529+BA.*)							8	3	8	1
BF.7	VOC Omicron GRA (B.1.1.529+BA.*)							20	73	170	110	102	37
BF.7.12	VOC Omicron GRA (B.1.1.529+BA.*)										1	2
BF.7.13.2	VOC Omicron GRA (B.1.1.529+BA.*)										1
BF.7.14	VOC Omicron GRA (B.1.1.529+BA.*)												1
BF.7.16	VOC Omicron GRA (B.1.1.529+BA.*)									2	4	8	5
BF.7.18	VOC Omicron GRA (B.1.1.529+BA.*)											1
BF.7.19	VOC Omicron GRA (B.1.1.529+BA.*)						1			2		1
BF.7.20	VOC Omicron GRA (B.1.1.529+BA.*)									2	4	1	2
BF.7.21	VOC Omicron GRA (B.1.1.529+BA.*)									2	6	6
BF.7.22	VOC Omicron GRA (B.1.1.529+BA.*)										2
BF.7.23	VOC Omicron GRA (B.1.1.529+BA.*)									1
BF.7.24	VOC Omicron GRA (B.1.1.529+BA.*)										2	2
BF.7.26	VOC Omicron GRA (B.1.1.529+BA.*)									3	6	4	1
BF.7.27	VOC Omicron GRA (B.1.1.529+BA.*)								6	8	4	2
BF.7.4	VOC Omicron GRA (B.1.1.529+BA.*)							2	13	27	42	14	7
BF.7.4.1	VOC Omicron GRA (B.1.1.529+BA.*)							1	7	34	61	27	5
BF.7.4.2	VOC Omicron GRA (B.1.1.529+BA.*)							1	5
BF.7.5	VOC Omicron GRA (B.1.1.529+BA.*)									2	8	11
BF.7.6	VOC Omicron GRA (B.1.1.529+BA.*)						1			23	15	2
BF.7.7	VOC Omicron GRA (B.1.1.529+BA.*)									4	1	2
BF.7.8	VOC Omicron GRA (B.1.1.529+BA.*)							1				1	1
BF.7.9	VOC Omicron GRA (B.1.1.529+BA.*)										1
BF.8	VOC Omicron GRA (B.1.1.529+BA.*)					2	44	136	37	29	13	3
BG.1	VOC Omicron GRA (B.1.1.529+BA.*)					2
BG.2	VOC Omicron GRA (B.1.1.529+BA.*)					15	27	5
BG.3	VOC Omicron GRA (B.1.1.529+BA.*)					2	3
BG.4	VOC Omicron GRA (B.1.1.529+BA.*)					4
BH.1	VOC Omicron GRA (B.1.1.529+BA.*)								2
BJ.1	VOC Omicron GRA (B.1.1.529+BA.*)							1	1	2
BK.1	VOC Omicron GRA (B.1.1.529+BA.*)						1	10	9	18	9	2	1
BL.1	VUM GRA (BA.2.75+BA.2.75.*)								3	7	7	2
BL.2	VUM GRA (BA.2.75+BA.2.75.*)									6	14	3
BL.3	VUM GRA (BA.2.75+BA.2.75.*)								2
BL.4	VUM GRA (BA.2.75+BA.2.75.*)									5
BL.6	VUM GRA (BA.2.75+BA.2.75.*)								1
BM.1	VUM GRA (BA.2.75+BA.2.75.*)								1	1
BM.1.1	VUM GRA (BA.2.75+BA.2.75.*)									4	48	5
BM.1.1.1	VUM GRA (BA.2.75+BA.2.75.*)									2	1
BM.1.1.3	VUM GRA (BA.2.75+BA.2.75.*)								4	17	6	3	4
BM.1.1.4	VUM GRA (BA.2.75+BA.2.75.*)										1
BM.2	VUM GRA (BA.2.75+BA.2.75.*)									1		1	1
BM.4.1	VUM GRA (BA.2.75+BA.2.75.*)										1
BM.4.1.1	VUM GRA (BA.2.75+BA.2.75.*)									14	34	12
BM.6	VUM GRA (BA.2.75+BA.2.75.*)										1
BN.1	VUM GRA (BA.2.75+BA.2.75.*)									5	30	23	27
BN.1.1	VUM GRA (BA.2.75+BA.2.75.*)											1
BN.1.10	VUM GRA (BA.2.75+BA.2.75.*)											2	1
BN.1.2	VUM GRA (BA.2.75+BA.2.75.*)										3	4	7
BN.1.2.1	VUM GRA (BA.2.75+BA.2.75.*)												1
BN.1.2.2	VUM GRA (BA.2.75+BA.2.75.*)										1		5
BN.1.2.5	VUM GRA (BA.2.75+BA.2.75.*)											1
BN.1.3	VUM GRA (BA.2.75+BA.2.75.*)									2	14	13	16
BN.1.3.1	VUM GRA (BA.2.75+BA.2.75.*)										4	9	12
BN.1.3.6	VUM GRA (BA.2.75+BA.2.75.*)										2
BN.1.3.7	VUM GRA (BA.2.75+BA.2.75.*)											1
BN.1.4	VUM GRA (BA.2.75+BA.2.75.*)									2	4	17	9
BN.1.4.5	VUM GRA (BA.2.75+BA.2.75.*)										12	30	9
BN.1.5	VUM GRA (BA.2.75+BA.2.75.*)									1	9	15	16
BN.1.5.2	VUM GRA (BA.2.75+BA.2.75.*)												3
BN.1.7	VUM GRA (BA.2.75+BA.2.75.*)										3	5
BN.1.9	VUM GRA (BA.2.75+BA.2.75.*)										1
BN.2	VUM GRA (BA.2.75+BA.2.75.*)								1
BN.2.1	VUM GRA (BA.2.75+BA.2.75.*)									4	3	1
BN.3.1	VUM GRA (BA.2.75+BA.2.75.*)												1
BN.4	VUM GRA (BA.2.75+BA.2.75.*)									1
BN.5	VUM GRA (BA.2.75+BA.2.75.*)								3		4
BN.6	VUM GRA (BA.2.75+BA.2.75.*)								1	7	7	1	1
BQ.1	VOC Omicron GRA (B.1.1.529+BA.*)								5	91	655	1142	564
BQ.1.1.1	VOC Omicron GRA (B.1.1.529+BA.*)									2	9	11	20
BQ.1.1.10	VOC Omicron GRA (B.1.1.529+BA.*)										1	4	9
BQ.1.1.11	VOC Omicron GRA (B.1.1.529+BA.*)										1	1	2
BQ.1.1.13	VOC Omicron GRA (B.1.1.529+BA.*)										8	8	9
BQ.1.1.15	VOC Omicron GRA (B.1.1.529+BA.*)											2	10
BQ.1.1.17	VOC Omicron GRA (B.1.1.529+BA.*)										2	11	6
BQ.1.1.18	VOC Omicron GRA (B.1.1.529+BA.*)										29	29	38
BQ.1.1.19	VOC Omicron GRA (B.1.1.529+BA.*)										1	5
BQ.1.1.2	VOC Omicron GRA (B.1.1.529+BA.*)											1	3
BQ.1.1.2													1
BQ.1.1.20	VOC Omicron GRA (B.1.1.529+BA.*)											1
BQ.1.1.22	VOC Omicron GRA (B.1.1.529+BA.*)											1	1
BQ.1.1.23	VOC Omicron GRA (B.1.1.529+BA.*)										2	5	3
BQ.1.1.24	VOC Omicron GRA (B.1.1.529+BA.*)										2	7	2
BQ.1.1.25	VOC Omicron GRA (B.1.1.529+BA.*)										11	37	28
BQ.1.1.26	VOC Omicron GRA (B.1.1.529+BA.*)										1
BQ.1.1.27	VOC Omicron GRA (B.1.1.529+BA.*)										3	5	3
BQ.1.1.28	VOC Omicron GRA (B.1.1.529+BA.*)											2	1
BQ.1.1.29	VOC Omicron GRA (B.1.1.529+BA.*)												1
BQ.1.1.3	VOC Omicron GRA (B.1.1.529+BA.*)									16	134	186	134
BQ.1.1.30	VOC Omicron GRA (B.1.1.529+BA.*)											1
BQ.1.1.32	VOC Omicron GRA (B.1.1.529+BA.*)												13
BQ.1.1.35	VOC Omicron GRA (B.1.1.529+BA.*)												1
BQ.1.1.36	VOC Omicron GRA (B.1.1.529+BA.*)												2
BQ.1.1.4	VOC Omicron GRA (B.1.1.529+BA.*)									9	81	234	142
BQ.1.1.40	VOC Omicron GRA (B.1.1.529+BA.*)										2	7	10
BQ.1.1.41	VOC Omicron GRA (B.1.1.529+BA.*)											2	14
BQ.1.1.42	VOC Omicron GRA (B.1.1.529+BA.*)											1
BQ.1.1.43	VOC Omicron GRA (B.1.1.529+BA.*)											1	4
BQ.1.1.47	VOC Omicron GRA (B.1.1.529+BA.*)												4
BQ.1.1.49	VOC Omicron GRA (B.1.1.529+BA.*)												1
BQ.1.1.5	VOC Omicron GRA (B.1.1.529+BA.*)									2	14	22	18
BQ.1.1.5												1
BQ.1.1.51	VOC Omicron GRA (B.1.1.529+BA.*)										3	41	28
BQ.1.1.52	VOC Omicron GRA (B.1.1.529+BA.*)										32	78	56
BQ.1.1.53	VOC Omicron GRA (B.1.1.529+BA.*)												1
BQ.1.1.56	VOC Omicron GRA (B.1.1.529+BA.*)												1
BQ.1.1.57	VOC Omicron GRA (B.1.1.529+BA.*)											1	2
BQ.1.1.58	VOC Omicron GRA (B.1.1.529+BA.*)
BQ.1.1.6	VOC Omicron GRA (B.1.1.529+BA.*)									1	19	34	37
BQ.1.1.60	VOC Omicron GRA (B.1.1.529+BA.*)											1
BQ.1.1.66	VOC Omicron GRA (B.1.1.529+BA.*)												1
BQ.1.1.67	VOC Omicron GRA (B.1.1.529+BA.*)											1	3
BQ.1.1.68	VOC Omicron GRA (B.1.1.529+BA.*)									6	144	212	144
BQ.1.1.69	VOC Omicron GRA (B.1.1.529+BA.*)									1	6	15	14
BQ.1.1.7	VOC Omicron GRA (B.1.1.529+BA.*)										21	58	24
BQ.1.1.72	VOC Omicron GRA (B.1.1.529+BA.*)												2
BQ.1.1.74	VOC Omicron GRA (B.1.1.529+BA.*)											1
BQ.1.1.8	VOC Omicron GRA (B.1.1.529+BA.*)											1	1
BQ.1.10	VOC Omicron GRA (B.1.1.529+BA.*)									2	44	67	42
BQ.1.10.1	VOC Omicron GRA (B.1.1.529+BA.*)										2	4	2
BQ.1.10.2	VOC Omicron GRA (B.1.1.529+BA.*)											1	2
BQ.1.11	VOC Omicron GRA (B.1.1.529+BA.*)									22	170	228	95
BQ.1.12	VOC Omicron GRA (B.1.1.529+BA.*)									6	34	57	31
BQ.1.13	VOC Omicron GRA (B.1.1.529+BA.*)		1							11	54	79	45
BQ.1.13.1	VOC Omicron GRA (B.1.1.529+BA.*)										1	8	8
BQ.1.14	VOC Omicron GRA (B.1.1.529+BA.*)									42	189	189	106
BQ.1.14										1
BQ.1.15	VOC Omicron GRA (B.1.1.529+BA.*)									1	8	10	4
BQ.1.16	VOC Omicron GRA (B.1.1.529+BA.*)									1	21	11	1
BQ.1.18	VOC Omicron GRA (B.1.1.529+BA.*)										1	1	3
BQ.1.19	VOC Omicron GRA (B.1.1.529+BA.*)
BQ.1.2	VOC Omicron GRA (B.1.1.529+BA.*)									11	103	174	121
BQ.1.2.1	VOC Omicron GRA (B.1.1.529+BA.*)											1
BQ.1.2.3	VOC Omicron GRA (B.1.1.529+BA.*)										4	4
BQ.1.20	VOC Omicron GRA (B.1.1.529+BA.*)											2
BQ.1.21	VOC Omicron GRA (B.1.1.529+BA.*)											1	2
BQ.1.22	VOC Omicron GRA (B.1.1.529+BA.*)											1	5
BQ.1.23	VOC Omicron GRA (B.1.1.529+BA.*)										7	8	8
BQ.1.24	VOC Omicron GRA (B.1.1.529+BA.*)											2
BQ.1.25	VOC Omicron GRA (B.1.1.529+BA.*)									1	3	6	6
BQ.1.25.1	VOC Omicron GRA (B.1.1.529+BA.*)												3
BQ.1.26	VOC Omicron GRA (B.1.1.529+BA.*)												1
BQ.1.26.1	VOC Omicron GRA (B.1.1.529+BA.*)										1
BQ.1.27	VOC Omicron GRA (B.1.1.529+BA.*)										2	24	6
BQ.1.3	VOC Omicron GRA (B.1.1.529+BA.*)									1	20	36	30
BQ.1.3.1	VOC Omicron GRA (B.1.1.529+BA.*)									1	14	12	7
BQ.1.3.2	VOC Omicron GRA (B.1.1.529+BA.*)									8	133	176	86
BQ.1.3.2												1
BQ.1.31	VOC Omicron GRA (B.1.1.529+BA.*)										1	3	5
BQ.1.4	VOC Omicron GRA (B.1.1.529+BA.*)											12	5
BQ.1.5	VOC Omicron GRA (B.1.1.529+BA.*)									8	20	44	22
BQ.1.6	VOC Omicron GRA (B.1.1.529+BA.*)									3	22	15	6
BQ.1.7	VOC Omicron GRA (B.1.1.529+BA.*)									7	14	3	5
BQ.1.8	VOC Omicron GRA (B.1.1.529+BA.*)									1	19	33	14
BQ.1.8.2	VOC Omicron GRA (B.1.1.529+BA.*)											2	2
BQ.1.9	VOC Omicron GRA (B.1.1.529+BA.*)										1
BQ.2	VOC Omicron GRA (B.1.1.529+BA.*)									3	3	2
BR.1	VUM GRA (BA.2.75+BA.2.75.*)									5	1	5
BR.1.2	VUM GRA (BA.2.75+BA.2.75.*)										13	27	8
BR.2	VUM GRA (BA.2.75+BA.2.75.*)												3
BR.2.1	VUM GRA (BA.2.75+BA.2.75.*)											3	4
BT.1	VOC Omicron GRA (B.1.1.529+BA.*)								1
BT.2	VOC Omicron GRA (B.1.1.529+BA.*)									1
BU.1	VOC Omicron GRA (B.1.1.529+BA.*)									5	25	15	17
BU.2	VOC Omicron GRA (B.1.1.529+BA.*)							3	1	5
BU.3	VOC Omicron GRA (B.1.1.529+BA.*)											3
BV.1	VOC Omicron GRA (B.1.1.529+BA.*)								1	1	1
BV.2	VOC Omicron GRA (B.1.1.529+BA.*)										1
BW.1	VOC Omicron GRA (B.1.1.529+BA.*)											1	6
BW.1.1	VOC Omicron GRA (B.1.1.529+BA.*)												1
BW.1.1.1	VOC Omicron GRA (B.1.1.529+BA.*)											4	1
BY.1	VUM GRA (BA.2.75+BA.2.75.*)								3	12	10	1	1
BY.1.2	VUM GRA (BA.2.75+BA.2.75.*)										1	1
BZ.1	VOC Omicron GRA (B.1.1.529+BA.*)								2
BZ.2	VOC Omicron GRA (B.1.1.529+BA.*)											2
CA.1	VUM GRA (BA.2.75+BA.2.75.*)									28	36	5	3
CA.2	VUM GRA (BA.2.75+BA.2.75.*)										1
CA.3	VUM GRA (BA.2.75+BA.2.75.*)									4	1
CA.3.1	VUM GRA (BA.2.75+BA.2.75.*)										1		3
CA.5	VUM GRA (BA.2.75+BA.2.75.*)								1	13	53	55	10
CA.7	VUM GRA (BA.2.75+BA.2.75.*)										1	3	1
CB.1	VUM GRA (BA.2.75+BA.2.75.*)									1	1
CD.1	VOC Omicron GRA (B.1.1.529+BA.*)								1
CE.1	VOC Omicron GRA (B.1.1.529+BA.*)											1
CF.1	VOC Omicron GRA (B.1.1.529+BA.*)							4	8	6	8	1
CG.1	VOC Omicron GRA (B.1.1.529+BA.*)									7
CH.1.1	VUM GRA (CH.1.1+CH.1.1.*)										3	15	24
CH.1.1.1	VUM GRA (CH.1.1+CH.1.1.*)											2	3
CH.1.1.11	VUM GRA (CH.1.1+CH.1.1.*)											2	2
CH.1.1.18	VUM GRA (CH.1.1+CH.1.1.*)										1
CH.1.1.2	VUM GRA (CH.1.1+CH.1.1.*)												1
CH.1.1.24	VUM GRA (CH.1.1+CH.1.1.*)											2	4
CH.1.1.25	VUM GRA (CH.1.1+CH.1.1.*)												10
CH.1.1.5	VUM GRA (CH.1.1+CH.1.1.*)												1
CJ.1	VUM GRA (BA.2.75+BA.2.75.*)											2	1
CJ.1.2	VUM GRA (BA.2.75+BA.2.75.*)												2
CK.1	VOC Omicron GRA (B.1.1.529+BA.*)									1	15	12	7
CK.1.3	VOC Omicron GRA (B.1.1.529+BA.*)											1	3
CK.1.4	VOC Omicron GRA (B.1.1.529+BA.*)										7	16	38
CK.1.5	VOC Omicron GRA (B.1.1.529+BA.*)											2
CK.2	VOC Omicron GRA (B.1.1.529+BA.*)										1	1	2
CK.2.1	VOC Omicron GRA (B.1.1.529+BA.*)										3	1
CK.2.1.1	VOC Omicron GRA (B.1.1.529+BA.*)											3
CK.3	VOC Omicron GRA (B.1.1.529+BA.*)									1	9	16	4
CL.1	VOC Omicron GRA (B.1.1.529+BA.*)										3	11	4
CL.1.1	VOC Omicron GRA (B.1.1.529+BA.*)												1
CM.10	VOC Omicron GRA (B.1.1.529+BA.*)												1
CM.2	VOC Omicron GRA (B.1.1.529+BA.*)										3	3	1
CM.3	VOC Omicron GRA (B.1.1.529+BA.*)											2
CM.4	VOC Omicron GRA (B.1.1.529+BA.*)										14	6
CM.5	VOC Omicron GRA (B.1.1.529+BA.*)									2		1
CM.7	VOC Omicron GRA (B.1.1.529+BA.*)											2
CM.8.1	VOC Omicron GRA (B.1.1.529+BA.*)												1
CN.1	VOC Omicron GRA (B.1.1.529+BA.*)								1	5	7	10	4
CN.2	VOC Omicron GRA (B.1.1.529+BA.*)									5	27	2	11
CP.1	VOC Omicron GRA (B.1.1.529+BA.*)								1	5	14	3	4
CP.1.1	VOC Omicron GRA (B.1.1.529+BA.*)												4
CP.1.2	VOC Omicron GRA (B.1.1.529+BA.*)										2	3	1
CP.2	VOC Omicron GRA (B.1.1.529+BA.*)									3
CP.3	VOC Omicron GRA (B.1.1.529+BA.*)											2
CP.4	VOC Omicron GRA (B.1.1.529+BA.*)										1
CP.5	VOC Omicron GRA (B.1.1.529+BA.*)										1		1
CP.6	VOC Omicron GRA (B.1.1.529+BA.*)										12	4
CQ.1.1	VOC Omicron GRA (B.1.1.529+BA.*)										2	2
CQ.2	VOC Omicron GRA (B.1.1.529+BA.*)										80	196	86
CR.1	VOC Omicron GRA (B.1.1.529+BA.*)										3		2
CR.1.1	VOC Omicron GRA (B.1.1.529+BA.*)										2	9	1
CR.2	VOC Omicron GRA (B.1.1.529+BA.*)									1
CT.1	VOC Omicron GRA (B.1.1.529+BA.*)									6
CV.1	VUM GRA (BA.2.75+BA.2.75.*)										2	5	1
CV.2	VUM GRA (BA.2.75+BA.2.75.*)											1
CY.1	VOC Omicron GRA (B.1.1.529+BA.*)										1
CZ.2	VOC Omicron GRA (B.1.1.529+BA.*)										2	1	1
DB.1	VOC Omicron GRA (B.1.1.529+BA.*)										3
DC.1	VOC Omicron GRA (B.1.1.529+BA.*)									14	11		2
DE.1	VOC Omicron GRA (B.1.1.529+BA.*)						6	7	6
DE.2	VOC Omicron GRA (B.1.1.529+BA.*)										1	2	1
DF.1	VOC Omicron GRA (B.1.1.529+BA.*)									1	3
DF.1.1	VOC Omicron GRA (B.1.1.529+BA.*)											1	2
DJ.1.1	VOC Omicron GRA (B.1.1.529+BA.*)										1
DJ.1.1.1	VOC Omicron GRA (B.1.1.529+BA.*)											1
DJ.1.3	VOC Omicron GRA (B.1.1.529+BA.*)												3
DK.1	VOC Omicron GRA (B.1.1.529+BA.*)												2
DL.1	VOC Omicron GRA (B.1.1.529+BA.*)										1	3
DM.1	VOC Omicron GRA (B.1.1.529+BA.*)											2	1
DN.1.1	VOC Omicron GRA (B.1.1.529+BA.*)											1
DN.1.1.2	VOC Omicron GRA (B.1.1.529+BA.*)												2
DN.2	VOC Omicron GRA (B.1.1.529+BA.*)										19	11	8
DQ.1	VOC Omicron GRA (B.1.1.529+BA.*)										1
DR.2	VOC Omicron GRA (B.1.1.529+BA.*)											1	1
DS.1	VUM GRA (BA.2.75+BA.2.75.*)											1	1
DS.2	VUM GRA (BA.2.75+BA.2.75.*)										1
DT.2	VOC Omicron GRA (B.1.1.529+BA.*)												1
DU.1	VOC Omicron GRA (B.1.1.529+BA.*)												1
DV.1	VUM GRA (CH.1.1+CH.1.1.*)												1
DV.6	VUM GRA (CH.1.1+CH.1.1.*)												1
DY.2	VOC Omicron GRA (B.1.1.529+BA.*)												5
DY.4	VOC Omicron GRA (B.1.1.529+BA.*)												1
EB.1	VOC Omicron GRA (B.1.1.529+BA.*)										1	2	4
ED.2	VOC Omicron GRA (B.1.1.529+BA.*)										4	5	7
ED.3	VOC Omicron GRA (B.1.1.529+BA.*)												1
EE.1	VOC Omicron GRA (B.1.1.529+BA.*)										4	19	15
EE.2	VOC Omicron GRA (B.1.1.529+BA.*)											1	3
EE.3	VOC Omicron GRA (B.1.1.529+BA.*)										3		1
EE.5	VOC Omicron GRA (B.1.1.529+BA.*)										27	38	29
EF.1	VOC Omicron GRA (B.1.1.529+BA.*)											4	1
EF.1.1	VOC Omicron GRA (B.1.1.529+BA.*)											7	3
EF.1.2	VOC Omicron GRA (B.1.1.529+BA.*)											3	3
EF.2	VOC Omicron GRA (B.1.1.529+BA.*)												1
EJ.1	VUM GRA (BA.2.75+BA.2.75.*)												2
EJ.2	VUM GRA (BA.2.75+BA.2.75.*)											3	5
EK.4	VOI GRA (XBB.1.5+XBB.1.5.*)												1
EW.2	VOC Omicron GRA (B.1.1.529+BA.*)										1	4	1
FD.2	VOI GRA (XBB.1.5+XBB.1.5.*)												2
FD.4	VOI GRA (XBB.1.5+XBB.1.5.*)											1	23
GP.2	VUM GRA (CH.1.1+CH.1.1.*)												1
Unassigned	VOC Omicron GRA (B.1.1.529+BA.*)	8	6	4	5		3	6	3		5
Unassigned						1		2				1
XAA	VOC Omicron GRA (B.1.1.529+BA.*)				2	12
XAC	VOC Omicron GRA (B.1.1.529+BA.*)				1	3
XAG	VOC Omicron GRA (B.1.1.529+BA.*)					1
XAJ	VOC Omicron GRA (B.1.1.529+BA.*)						1	1	4	1
XAK	VOC Omicron GRA (B.1.1.529+BA.*)							1
XAM	VOC Omicron GRA (B.1.1.529+BA.*)					3	5
XAN	VOC Omicron GRA (B.1.1.529+BA.*)							1	1	1
XAS	VOC Omicron GRA (B.1.1.529+BA.*)						7		5	5		1
XAY.1	VOC Omicron GRA (B.1.1.529+BA.*)											1
XAZ	VOC Omicron GRA (B.1.1.529+BA.*)							6	5	5
XBB	VUM GRA (XBB+XBB.* excluding XBB.1.5, XBB.1.16, XBB.1.9.1, XBB.1.9.2, XBB.2.3)									1	14	53	44
XBB.1.1	VUM GRA (XBB+XBB.* excluding XBB.1.5, XBB.1.16, XBB.1.9.1, XBB.1.9.2, XBB.2.3)										1
XBB.1.11	VUM GRA (XBB+XBB.* excluding XBB.1.5, XBB.1.16, XBB.1.9.1, XBB.1.9.2, XBB.2.3)										4	18	12
XBB.1.13	VUM GRA (XBB+XBB.* excluding XBB.1.5, XBB.1.16, XBB.1.9.1, XBB.1.9.2, XBB.2.3)												2
XBB.1.15	VUM GRA (XBB+XBB.* excluding XBB.1.5, XBB.1.16, XBB.1.9.1, XBB.1.9.2, XBB.2.3)										7	26	39
XBB.1.18	VUM GRA (XBB+XBB.* excluding XBB.1.5, XBB.1.16, XBB.1.9.1, XBB.1.9.2, XBB.2.3)												2
XBB.1.4	VUM GRA (XBB+XBB.* excluding XBB.1.5, XBB.1.16, XBB.1.9.1, XBB.1.9.2, XBB.2.3)											1	1
XBB.1.5.1	VOI GRA (XBB.1.5+XBB.1.5.*)											1	12
XBB.1.5.11	VOI GRA (XBB.1.5+XBB.1.5.*)											4	12
XBB.1.5.13	VOI GRA (XBB.1.5+XBB.1.5.*)											1	19
XBB.1.5.15	VOI GRA (XBB.1.5+XBB.1.5.*)											16	109
XBB.1.5.16	VOI GRA (XBB.1.5+XBB.1.5.*)												17
XBB.1.5.17	VOI GRA (XBB.1.5+XBB.1.5.*)											5	59
XBB.1.5.19	VOI GRA (XBB.1.5+XBB.1.5.*)											18	51
XBB.1.5.2	VOI GRA (XBB.1.5+XBB.1.5.*)												1
XBB.1.5.20	VOI GRA (XBB.1.5+XBB.1.5.*)											8	27
XBB.1.5.26	VOI GRA (XBB.1.5+XBB.1.5.*)											1	2
XBB.1.5.3	VOI GRA (XBB.1.5+XBB.1.5.*)												4
XBB.1.5.31	VOI GRA (XBB.1.5+XBB.1.5.*)												1
XBB.1.5.33	VOI GRA (XBB.1.5+XBB.1.5.*)											1	7
XBB.1.5.35	VOI GRA (XBB.1.5+XBB.1.5.*)												1
XBB.1.5.36	VOI GRA (XBB.1.5+XBB.1.5.*)												10
XBB.1.5.39	VOI GRA (XBB.1.5+XBB.1.5.*)											1	29
XBB.1.5.4	VOI GRA (XBB.1.5+XBB.1.5.*)												2
XBB.1.5.41	VOI GRA (XBB.1.5+XBB.1.5.*)												3
XBB.1.5.47	VOI GRA (XBB.1.5+XBB.1.5.*)												1
XBB.1.5.48	VOI GRA (XBB.1.5+XBB.1.5.*)											3	9
XBB.1.5.5	VOI GRA (XBB.1.5+XBB.1.5.*)											3	15
XBB.1.5.51	VOI GRA (XBB.1.5+XBB.1.5.*)												4
XBB.1.5.52	VOI GRA (XBB.1.5+XBB.1.5.*)											3	14
XBB.1.5.55	VOI GRA (XBB.1.5+XBB.1.5.*)											3	19
XBB.1.5.56	VOI GRA (XBB.1.5+XBB.1.5.*)												1
XBB.1.5.6	VOI GRA (XBB.1.5+XBB.1.5.*)											2	23
XBB.1.5.61	VOI GRA (XBB.1.5+XBB.1.5.*)												16
XBB.1.5.62	VOI GRA (XBB.1.5+XBB.1.5.*)												12
XBB.1.5.63	VOI GRA (XBB.1.5+XBB.1.5.*)												1
XBB.1.5.66	VOI GRA (XBB.1.5+XBB.1.5.*)											2	5
XBB.1.5.67	VOI GRA (XBB.1.5+XBB.1.5.*)											6	21
XBB.1.5.69	VOI GRA (XBB.1.5+XBB.1.5.*)												1
XBB.1.5.7	VOI GRA (XBB.1.5+XBB.1.5.*)												9
XBB.1.5.75	VOI GRA (XBB.1.5+XBB.1.5.*)												2
XBB.1.5.8	VOI GRA (XBB.1.5+XBB.1.5.*)											3	12
XBB.1.5.80	VOI GRA (XBB.1.5+XBB.1.5.*)												3
XBB.1.5.9	VOI GRA (XBB.1.5+XBB.1.5.*)											1	8
XBB.1.5.95	VOI GRA (XBB.1.5+XBB.1.5.*)												1
XBB.1.5.96	VOI GRA (XBB.1.5+XBB.1.5.*)											1	5
XBB.1.7	VUM GRA (XBB+XBB.* excluding XBB.1.5, XBB.1.16, XBB.1.9.1, XBB.1.9.2, XBB.2.3)										2	54	51
XBB.1.9	VUM GRA (XBB+XBB.* excluding XBB.1.5, XBB.1.16, XBB.1.9.1, XBB.1.9.2, XBB.2.3)											1	3
XBB.1.9.4	VUM GRA (XBB+XBB.* excluding XBB.1.5, XBB.1.16, XBB.1.9.1, XBB.1.9.2, XBB.2.3)											1	6
XBB.2	VUM GRA (XBB+XBB.* excluding XBB.1.5, XBB.1.16, XBB.1.9.1, XBB.1.9.2, XBB.2.3)										1	7	18
XBB.2.11	VUM GRA (XBB+XBB.* excluding XBB.1.5, XBB.1.16, XBB.1.9.1, XBB.1.9.2, XBB.2.3)										2
XBB.2.11.1	VUM GRA (XBB+XBB.* excluding XBB.1.5, XBB.1.16, XBB.1.9.1, XBB.1.9.2, XBB.2.3)										10	88	58
XBB.2.5	VUM GRA (XBB+XBB.* excluding XBB.1.5, XBB.1.16, XBB.1.9.1, XBB.1.9.2, XBB.2.3)										1		4
XBB.2.6	VUM GRA (XBB+XBB.* excluding XBB.1.5, XBB.1.16, XBB.1.9.1, XBB.1.9.2, XBB.2.3)											8	10
XBB.2.6.2	VUM GRA (XBB+XBB.* excluding XBB.1.5, XBB.1.16, XBB.1.9.1, XBB.1.9.2, XBB.2.3)											1
XBB.2.8	VUM GRA (XBB+XBB.* excluding XBB.1.5, XBB.1.16, XBB.1.9.1, XBB.1.9.2, XBB.2.3)											1
XBB.3	VUM GRA (XBB+XBB.* excluding XBB.1.5, XBB.1.16, XBB.1.9.1, XBB.1.9.2, XBB.2.3)										2	4
XBB.3.2	VUM GRA (XBB+XBB.* excluding XBB.1.5, XBB.1.16, XBB.1.9.1, XBB.1.9.2, XBB.2.3)												1
XBB.4	VUM GRA (XBB+XBB.* excluding XBB.1.5, XBB.1.16, XBB.1.9.1, XBB.1.9.2, XBB.2.3)												18
XBB.6	VUM GRA (XBB+XBB.* excluding XBB.1.5, XBB.1.16, XBB.1.9.1, XBB.1.9.2, XBB.2.3)										2	32	24
XBB.6.1	VUM GRA (XBB+XBB.* excluding XBB.1.5, XBB.1.16, XBB.1.9.1, XBB.1.9.2, XBB.2.3)												1
XBB.8	VUM GRA (XBB+XBB.* excluding XBB.1.5, XBB.1.16, XBB.1.9.1, XBB.1.9.2, XBB.2.3)									1	4	2	5
XBB.9	VUM GRA (XBB+XBB.* excluding XBB.1.5, XBB.1.16, XBB.1.9.1, XBB.1.9.2, XBB.2.3)									1
XBC.1	VOC Omicron GRA (B.1.1.529+BA.*)											1
XBD	VOC Omicron GRA (B.1.1.529+BA.*)										1
XBE	VOC Omicron GRA (B.1.1.529+BA.*)								6	16	29	7	2
XBF	VOC Omicron GRA (B.1.1.529+BA.*)											2	4
XBF.9	VOC Omicron GRA (B.1.1.529+BA.*)											2	3
XBM	VOC Omicron GRA (B.1.1.529+BA.*)								1
XBN	VOC Omicron GRA (B.1.1.529+BA.*)										2	1
XBW	VOC Omicron GRA (B.1.1.529+BA.*)	1											3
XCG	VOC Omicron GRA (B.1.1.529+BA.*)												1
XE	VOC Omicron GRA (B.1.1.529+BA.*)			1	6	26	2	1
XM	VOC Omicron GRA (B.1.1.529+BA.*)			1
XN	VOC Omicron GRA (B.1.1.529+BA.*)			1
XS	VOC Omicron GRA (B.1.1.529+BA.*)		1
XW	VOC Omicron GRA (B.1.1.529+BA.*)				3	9
XY	VOC Omicron GRA (B.1.1.529+BA.*)				3
XZ	VOC Omicron GRA (B.1.1.529+BA.*)				2	3	1

## Sheet: LI
Pango.lineage	Variant	2022-1	2022-2	2022-3	2022-4	2022-5	2022-6	2022-7	2022-8	2022-9	2022-10	2022-11	2022-12
AY.100	VOC Delta GK (B.1.617.2+AY.*)	1
BA.1.1.16	VOC Omicron GRA (B.1.1.529+BA.*)		1
BA.1.18	VOC Omicron GRA (B.1.1.529+BA.*)	3
BA.1.20	VOC Omicron GRA (B.1.1.529+BA.*)	1
BA.1.23	VOC Omicron GRA (B.1.1.529+BA.*)				1	1
BA.2.10	VOC Omicron GRA (B.1.1.529+BA.*)						1
BA.2.3.17	VOC Omicron GRA (B.1.1.529+BA.*)				1
BA.2.43	VOC Omicron GRA (B.1.1.529+BA.*)					1
BA.2.48	VOC Omicron GRA (B.1.1.529+BA.*)					1
BA.2.75.1	VUM GRA (BA.2.75+BA.2.75.*)								1
BA.5.1.23	VOC Omicron GRA (B.1.1.529+BA.*)							1
BA.5.1.3	VOC Omicron GRA (B.1.1.529+BA.*)								2
BA.5.1.5	VOC Omicron GRA (B.1.1.529+BA.*)								1
BA.5.1.7	VOC Omicron GRA (B.1.1.529+BA.*)							1
BA.5.2.22	VOC Omicron GRA (B.1.1.529+BA.*)								1
BA.5.2.27	VOC Omicron GRA (B.1.1.529+BA.*)									1
BA.5.2.28	VOC Omicron GRA (B.1.1.529+BA.*)						1
BA.5.2.3	VOC Omicron GRA (B.1.1.529+BA.*)								1
BA.5.2.6	VOC Omicron GRA (B.1.1.529+BA.*)										1
BA.5.3.5	VOC Omicron GRA (B.1.1.529+BA.*)											1
BA.5.6.2	VOC Omicron GRA (B.1.1.529+BA.*)							1
BF.1	VOC Omicron GRA (B.1.1.529+BA.*)							1
BF.11.4	VOC Omicron GRA (B.1.1.529+BA.*)										1
BF.13	VOC Omicron GRA (B.1.1.529+BA.*)								1
BF.36	VOC Omicron GRA (B.1.1.529+BA.*)						1	2
BF.41	VOC Omicron GRA (B.1.1.529+BA.*)									1
BF.6	VOC Omicron GRA (B.1.1.529+BA.*)									1
BF.7	VOC Omicron GRA (B.1.1.529+BA.*)										2
BF.7.10	VOC Omicron GRA (B.1.1.529+BA.*)						1
BM.1.1	VUM GRA (BA.2.75+BA.2.75.*)										2
BQ.1	VOC Omicron GRA (B.1.1.529+BA.*)									1
BQ.1.1.4	VOC Omicron GRA (B.1.1.529+BA.*)											1
BQ.1.10	VOC Omicron GRA (B.1.1.529+BA.*)											1	1
BQ.1.13	VOC Omicron GRA (B.1.1.529+BA.*)												1
BQ.1.14	VOC Omicron GRA (B.1.1.529+BA.*)											1	1
CF.1	VOC Omicron GRA (B.1.1.529+BA.*)								1
CQ.2	VOC Omicron GRA (B.1.1.529+BA.*)											1
XBB.1.5.16	VOI GRA (XBB.1.5+XBB.1.5.*)												1
XBB.1.5.4	VOI GRA (XBB.1.5+XBB.1.5.*)												1
XBB.1.5.7	VOI GRA (XBB.1.5+XBB.1.5.*)												2
XBB.1.5.8	VOI GRA (XBB.1.5+XBB.1.5.*)												1

## Sheet: Ontario CA
Pango.lineage	Variant	2022-1	2022-2	2022-3	2022-4	2022-5	2022-6	2022-7	2022-8	2022-9	2022-10	2022-11	2022-12
AY.100	VOC Delta GK (B.1.617.2+AY.*)	1
AY.103	VOC Delta GK (B.1.617.2+AY.*)	16			5
AY.119	VOC Delta GK (B.1.617.2+AY.*)	1
AY.121.1	VOC Delta GK (B.1.617.2+AY.*)	2
AY.122	VOC Delta GK (B.1.617.2+AY.*)	6
AY.127	VOC Delta GK (B.1.617.2+AY.*)	2
AY.131	VOC Delta GK (B.1.617.2+AY.*)	1
AY.25.1	VOC Delta GK (B.1.617.2+AY.*)	10	1		1
AY.25.3	VOC Delta GK (B.1.617.2+AY.*)	40	4				3
AY.27	VOC Delta GK (B.1.617.2+AY.*)	3			1
AY.3	VOC Delta GK (B.1.617.2+AY.*)	5	1
AY.39	VOC Delta GK (B.1.617.2+AY.*)	4
AY.4	VOC Delta GK (B.1.617.2+AY.*)	1
AY.43	VOC Delta GK (B.1.617.2+AY.*)	2
AY.44	VOC Delta GK (B.1.617.2+AY.*)	3					3
AY.6	VOC Delta GK (B.1.617.2+AY.*)	2
AY.74	VOC Delta GK (B.1.617.2+AY.*)	12
AY.75	VOC Delta GK (B.1.617.2+AY.*)	6
AY.86	VOC Delta GK (B.1.617.2+AY.*)	2
B.1.1.529	VOC Omicron GRA (B.1.1.529+BA.*)				1	1
B.1.617.2	VOC Delta GK (B.1.617.2+AY.*)	2
B.1.640.1	VUM GH/490R (B.1.640+B.1.640.*)	1
BA.1.1.1	VOC Omicron GRA (B.1.1.529+BA.*)	10	13	8	3
BA.1.1.10	VOC Omicron GRA (B.1.1.529+BA.*)	346	168	130	20	4	5	2
BA.1.1.13	VOC Omicron GRA (B.1.1.529+BA.*)	1	1
BA.1.1.14	VOC Omicron GRA (B.1.1.529+BA.*)	103	56	46	8
BA.1.1.16	VOC Omicron GRA (B.1.1.529+BA.*)	3	21	26	6
BA.1.1.17	VOC Omicron GRA (B.1.1.529+BA.*)		1	4
BA.1.1.2	VOC Omicron GRA (B.1.1.529+BA.*)	4			1
BA.1.1.6	VOC Omicron GRA (B.1.1.529+BA.*)	1
BA.1.1.7	VOC Omicron GRA (B.1.1.529+BA.*)	4	1
BA.1.1.8	VOC Omicron GRA (B.1.1.529+BA.*)	1
BA.1.13	VOC Omicron GRA (B.1.1.529+BA.*)	16	2
BA.1.13.1	VOC Omicron GRA (B.1.1.529+BA.*)		1
BA.1.14	VOC Omicron GRA (B.1.1.529+BA.*)	7	22	31	3
BA.1.14.1	VOC Omicron GRA (B.1.1.529+BA.*)	1
BA.1.15.1	VOC Omicron GRA (B.1.1.529+BA.*)	6	3
BA.1.15.2	VOC Omicron GRA (B.1.1.529+BA.*)	1	2
BA.1.16	VOC Omicron GRA (B.1.1.529+BA.*)		1
BA.1.17	VOC Omicron GRA (B.1.1.529+BA.*)	111	20	19
BA.1.18	VOC Omicron GRA (B.1.1.529+BA.*)	36	5	8	2			1
BA.1.19	VOC Omicron GRA (B.1.1.529+BA.*)	4	3	1
BA.1.20	VOC Omicron GRA (B.1.1.529+BA.*)	34	14	6	1
BA.1.21	VOC Omicron GRA (B.1.1.529+BA.*)	1	1
BA.1.4	VOC Omicron GRA (B.1.1.529+BA.*)	1
BA.1.6	VOC Omicron GRA (B.1.1.529+BA.*)	23		3
BA.1.7	VOC Omicron GRA (B.1.1.529+BA.*)		1
BA.2.1	VOC Omicron GRA (B.1.1.529+BA.*)		1	11	12	9	4	2
BA.2.10	VOC Omicron GRA (B.1.1.529+BA.*)	56	65	84	32	7	1
BA.2.10.1	VOC Omicron GRA (B.1.1.529+BA.*)	7	3	2	4
BA.2.10.3	VOC Omicron GRA (B.1.1.529+BA.*)		1
BA.2.11	VOC Omicron GRA (B.1.1.529+BA.*)				1		3	1
BA.2.12	VOC Omicron GRA (B.1.1.529+BA.*)	1	3	11	8	1	2
BA.2.12.2	VOC Omicron GRA (B.1.1.529+BA.*)					1
BA.2.13	VOC Omicron GRA (B.1.1.529+BA.*)					3	13	1
BA.2.13.1	VOC Omicron GRA (B.1.1.529+BA.*)					3	7	14	1
BA.2.15	VOC Omicron GRA (B.1.1.529+BA.*)						1
BA.2.17	VOC Omicron GRA (B.1.1.529+BA.*)			1
BA.2.18	VOC Omicron GRA (B.1.1.529+BA.*)			2	1	13	9	7	1
BA.2.20	VOC Omicron GRA (B.1.1.529+BA.*)	1	14	249	283	99	29	3
BA.2.21	VOC Omicron GRA (B.1.1.529+BA.*)			31	56	40	81	8
BA.2.23	VOC Omicron GRA (B.1.1.529+BA.*)	1	1	15	9	4	5	2
BA.2.24	VOC Omicron GRA (B.1.1.529+BA.*)					1
BA.2.26	VOC Omicron GRA (B.1.1.529+BA.*)				4	1
BA.2.3.10	VOC Omicron GRA (B.1.1.529+BA.*)		1	8	21	11	1
BA.2.3.12	VOC Omicron GRA (B.1.1.529+BA.*)			2		1
BA.2.3.14	VOC Omicron GRA (B.1.1.529+BA.*)				1	1
BA.2.3.15	VOC Omicron GRA (B.1.1.529+BA.*)				1
BA.2.3.16	VOC Omicron GRA (B.1.1.529+BA.*)					1
BA.2.3.2	VOC Omicron GRA (B.1.1.529+BA.*)		2		2	6	3
BA.2.3.20	VOC Omicron GRA (B.1.1.529+BA.*)									5	7	10	18
BA.2.3.4	VOC Omicron GRA (B.1.1.529+BA.*)	6	28	166	131	29	9
BA.2.3.6	VOC Omicron GRA (B.1.1.529+BA.*)		2	7	27	15	8	1
BA.2.3.7	VOC Omicron GRA (B.1.1.529+BA.*)					1	1
BA.2.3.8	VOC Omicron GRA (B.1.1.529+BA.*)			1	1
BA.2.31	VOC Omicron GRA (B.1.1.529+BA.*)				3		6	3
BA.2.31.1	VOC Omicron GRA (B.1.1.529+BA.*)				1		1
BA.2.32	VOC Omicron GRA (B.1.1.529+BA.*)		1			1
BA.2.33	VOC Omicron GRA (B.1.1.529+BA.*)			1
BA.2.34	VOC Omicron GRA (B.1.1.529+BA.*)			1
BA.2.35	VOC Omicron GRA (B.1.1.529+BA.*)				2		1
BA.2.36	VOC Omicron GRA (B.1.1.529+BA.*)			1		4	2	2
BA.2.37	VOC Omicron GRA (B.1.1.529+BA.*)	7	5	11	8	7	1
BA.2.38	VOC Omicron GRA (B.1.1.529+BA.*)		3	5	2	8	23	16
BA.2.38.1	VOC Omicron GRA (B.1.1.529+BA.*)							1
BA.2.38.2	VOC Omicron GRA (B.1.1.529+BA.*)						1			1
BA.2.40.1	VOC Omicron GRA (B.1.1.529+BA.*)				1	2	10	2
BA.2.41	VOC Omicron GRA (B.1.1.529+BA.*)					1	3
BA.2.42	VOC Omicron GRA (B.1.1.529+BA.*)					1	1
BA.2.43	VOC Omicron GRA (B.1.1.529+BA.*)					1
BA.2.48	VOC Omicron GRA (B.1.1.529+BA.*)						4	2
BA.2.49	VOC Omicron GRA (B.1.1.529+BA.*)			1	1
BA.2.5	VOC Omicron GRA (B.1.1.529+BA.*)			15	17	5
BA.2.50	VOC Omicron GRA (B.1.1.529+BA.*)						8
BA.2.51	VOC Omicron GRA (B.1.1.529+BA.*)		5	12	1
BA.2.52	VOC Omicron GRA (B.1.1.529+BA.*)					1	1
BA.2.53	VOC Omicron GRA (B.1.1.529+BA.*)						1
BA.2.55	VOC Omicron GRA (B.1.1.529+BA.*)					1
BA.2.56	VOC Omicron GRA (B.1.1.529+BA.*)			3		3	10	2
BA.2.57	VOC Omicron GRA (B.1.1.529+BA.*)			1
BA.2.6	VOC Omicron GRA (B.1.1.529+BA.*)			1
BA.2.64	VOC Omicron GRA (B.1.1.529+BA.*)			1	4	2	1
BA.2.66	VOC Omicron GRA (B.1.1.529+BA.*)			4	5	3	1
BA.2.68	VOC Omicron GRA (B.1.1.529+BA.*)				1
BA.2.7	VOC Omicron GRA (B.1.1.529+BA.*)			5	1	2
BA.2.72	VOC Omicron GRA (B.1.1.529+BA.*)			1
BA.2.73	VOC Omicron GRA (B.1.1.529+BA.*)					1
BA.2.74	VOC Omicron GRA (B.1.1.529+BA.*)						7	10	4
BA.2.75	VUM GRA (BA.2.75+BA.2.75.*)						2	20	12	2	42		1
BA.2.75.1	VUM GRA (BA.2.75+BA.2.75.*)						1	1	1	3	2
BA.2.75.2	VUM GRA (BA.2.75+BA.2.75.*)								2	28	25	76	1
BA.2.75.3	VUM GRA (BA.2.75+BA.2.75.*)								4		2
BA.2.75.4	VUM GRA (BA.2.75+BA.2.75.*)								1
BA.2.75.5	VUM GRA (BA.2.75+BA.2.75.*)								4	2	5	1	4
BA.2.75.6	VUM GRA (BA.2.75+BA.2.75.*)								1
BA.2.78	VOC Omicron GRA (B.1.1.529+BA.*)					2
BA.2.79	VOC Omicron GRA (B.1.1.529+BA.*)						1	2
BA.2.8	VOC Omicron GRA (B.1.1.529+BA.*)			2	1	3
BA.2.81	VOC Omicron GRA (B.1.1.529+BA.*)						2	1
BA.2.9.2	VOC Omicron GRA (B.1.1.529+BA.*)			2			1
BA.2.9.3	VOC Omicron GRA (B.1.1.529+BA.*)					3	5
BA.2.9.5	VOC Omicron GRA (B.1.1.529+BA.*)				1	1	1	2
BA.2.9.7	VOC Omicron GRA (B.1.1.529+BA.*)					1	2	2
BA.4.3	VOC Omicron GRA (B.1.1.529+BA.*)						1
BA.4.6.2	VOC Omicron GRA (B.1.1.529+BA.*)									1	28	4	2
BA.4.6.3	VOC Omicron GRA (B.1.1.529+BA.*)											1	1
BA.5.1.10	VOC Omicron GRA (B.1.1.529+BA.*)						12	28	8	18	45	19	1
BA.5.1.12	VOC Omicron GRA (B.1.1.529+BA.*)									4	40	7	12
BA.5.1.15	VOC Omicron GRA (B.1.1.529+BA.*)						1	1		1	6
BA.5.1.17	VOC Omicron GRA (B.1.1.529+BA.*)							5			1
BA.5.1.18	VOC Omicron GRA (B.1.1.529+BA.*)								7	13	16	6	11
BA.5.1.19	VOC Omicron GRA (B.1.1.529+BA.*)							1	1	2	4
BA.5.1.2	VOC Omicron GRA (B.1.1.529+BA.*)						10	29	12	23	109	8
BA.5.1.20	VOC Omicron GRA (B.1.1.529+BA.*)								3	5	14	2	1
BA.5.1.21	VOC Omicron GRA (B.1.1.529+BA.*)						3
BA.5.1.23	VOC Omicron GRA (B.1.1.529+BA.*)						18	54	33	30	70	11	17
BA.5.1.24	VOC Omicron GRA (B.1.1.529+BA.*)						7	31	5	9	22
BA.5.1.25	VOC Omicron GRA (B.1.1.529+BA.*)						8	33	12	11	4
BA.5.1.27	VOC Omicron GRA (B.1.1.529+BA.*)											9	38
BA.5.1.28	VOC Omicron GRA (B.1.1.529+BA.*)								2	1			3
BA.5.1.3	VOC Omicron GRA (B.1.1.529+BA.*)						3	4	7	3	4	1	1
BA.5.1.33	VOC Omicron GRA (B.1.1.529+BA.*)										5	7	3
BA.5.1.35	VOC Omicron GRA (B.1.1.529+BA.*)							12	4
BA.5.1.36	VOC Omicron GRA (B.1.1.529+BA.*)									1	1	2	1
BA.5.1.4	VOC Omicron GRA (B.1.1.529+BA.*)							3			1
BA.5.1.5	VOC Omicron GRA (B.1.1.529+BA.*)							2	19	26	62	18	10
BA.5.1.6	VOC Omicron GRA (B.1.1.529+BA.*)						2	5	3	3	4	2	6
BA.5.1.7	VOC Omicron GRA (B.1.1.529+BA.*)						31	115	75	71	45	10	2
BA.5.1.9	VOC Omicron GRA (B.1.1.529+BA.*)								1
BA.5.10	VOC Omicron GRA (B.1.1.529+BA.*)					1	1	27	8	35	52	4	1
BA.5.10.1	VOC Omicron GRA (B.1.1.529+BA.*)											1
BA.5.2.13	VOC Omicron GRA (B.1.1.529+BA.*)									1	28	48	41
BA.5.2.14	VOC Omicron GRA (B.1.1.529+BA.*)								5	16	36	13	9
BA.5.2.16	VOC Omicron GRA (B.1.1.529+BA.*)							7	6	4	4		5
BA.5.2.18	VOC Omicron GRA (B.1.1.529+BA.*)								1	1	21	3
BA.5.2.19	VOC Omicron GRA (B.1.1.529+BA.*)							4	1	4	19
BA.5.2.2	VOC Omicron GRA (B.1.1.529+BA.*)						4	29	18	4	21	1
BA.5.2.22	VOC Omicron GRA (B.1.1.529+BA.*)					2	11	42	25	44	132	18	6
BA.5.2.23	VOC Omicron GRA (B.1.1.529+BA.*)									2	25	13	4
BA.5.2.24	VOC Omicron GRA (B.1.1.529+BA.*)							1			12	4	8
BA.5.2.25	VOC Omicron GRA (B.1.1.529+BA.*)								3	7	38	16	8
BA.5.2.26	VOC Omicron GRA (B.1.1.529+BA.*)							33	1	4	13	2	5
BA.5.2.27	VOC Omicron GRA (B.1.1.529+BA.*)						1	7	30	12	26	2
BA.5.2.28	VOC Omicron GRA (B.1.1.529+BA.*)				1	2	1	12	34	1	11	13	16
BA.5.2.3	VOC Omicron GRA (B.1.1.529+BA.*)						14	16	12	12	47	2	41
BA.5.2.31	VOC Omicron GRA (B.1.1.529+BA.*)									2	18	2	2
BA.5.2.32	VOC Omicron GRA (B.1.1.529+BA.*)								1	2	9	15	9
BA.5.2.33	VOC Omicron GRA (B.1.1.529+BA.*)						1	1	3	3	2		14
BA.5.2.34	VOC Omicron GRA (B.1.1.529+BA.*)							4		6	30	27	14
BA.5.2.35	VOC Omicron GRA (B.1.1.529+BA.*)										12	5	46
BA.5.2.36	VOC Omicron GRA (B.1.1.529+BA.*)									2	2
BA.5.2.37	VOC Omicron GRA (B.1.1.529+BA.*)								3	2	1
BA.5.2.39	VOC Omicron GRA (B.1.1.529+BA.*)									1
BA.5.2.4	VOC Omicron GRA (B.1.1.529+BA.*)									1
BA.5.2.44	VOC Omicron GRA (B.1.1.529+BA.*)								1
BA.5.2.47	VOC Omicron GRA (B.1.1.529+BA.*)										2	2	8
BA.5.2.48	VOC Omicron GRA (B.1.1.529+BA.*)									71	120	8	1
BA.5.2.56	VOC Omicron GRA (B.1.1.529+BA.*)									2	3	1	1
BA.5.2.57	VOC Omicron GRA (B.1.1.529+BA.*)									2	4	4	15
BA.5.2.58	VOC Omicron GRA (B.1.1.529+BA.*)										3	2
BA.5.2.59	VOC Omicron GRA (B.1.1.529+BA.*)							1
BA.5.2.6	VOC Omicron GRA (B.1.1.529+BA.*)							5	2	3	27	34	53
BA.5.2.60	VOC Omicron GRA (B.1.1.529+BA.*)									1
BA.5.2.63	VOC Omicron GRA (B.1.1.529+BA.*)											1	39
BA.5.2.7	VOC Omicron GRA (B.1.1.529+BA.*)								1		1
BA.5.2.8	VOC Omicron GRA (B.1.1.529+BA.*)						1	11	19	11	7	1
BA.5.3	VOC Omicron GRA (B.1.1.529+BA.*)						1	8	2
BA.5.3.1	VOC Omicron GRA (B.1.1.529+BA.*)						21	11	1	1	2	1	7
BA.5.3.2	VOC Omicron GRA (B.1.1.529+BA.*)						1
BA.5.3.3	VOC Omicron GRA (B.1.1.529+BA.*)							5	1	12
BA.5.3.4	VOC Omicron GRA (B.1.1.529+BA.*)						2
BA.5.5.1	VOC Omicron GRA (B.1.1.529+BA.*)								3	4	17	2	1
BA.5.5.3	VOC Omicron GRA (B.1.1.529+BA.*)						2	3	1	3
BA.5.6.1	VOC Omicron GRA (B.1.1.529+BA.*)										1
BA.5.6.2	VOC Omicron GRA (B.1.1.529+BA.*)						2	2	8	3	3	1	3
BA.5.9	VOC Omicron GRA (B.1.1.529+BA.*)							2	2	9	16	15	13
BC.2	VOC Omicron GRA (B.1.1.529+BA.*)		1
BE.1.1.1	VOC Omicron GRA (B.1.1.529+BA.*)							1	3	29	34	11	2
BE.1.1.2	VOC Omicron GRA (B.1.1.529+BA.*)							7	13	7	5		1
BE.1.2	VOC Omicron GRA (B.1.1.529+BA.*)								1			1
BE.1.2.1	VOC Omicron GRA (B.1.1.529+BA.*)								13	47	134	48	87
BE.1.4	VOC Omicron GRA (B.1.1.529+BA.*)						4	14	8	12	36	6
BE.1.4.1	VOC Omicron GRA (B.1.1.529+BA.*)							1	15	3	11
BE.10	VOC Omicron GRA (B.1.1.529+BA.*)											2	7
BE.11	VOC Omicron GRA (B.1.1.529+BA.*)							1		3	1
BE.4	VOC Omicron GRA (B.1.1.529+BA.*)						60	16	4	3	2
BE.4.1	VOC Omicron GRA (B.1.1.529+BA.*)								1	7	7	1
BE.4.1.1	VOC Omicron GRA (B.1.1.529+BA.*)												1
BE.5	VOC Omicron GRA (B.1.1.529+BA.*)					2	13	27	29	1	1	1	1
BE.9	VOC Omicron GRA (B.1.1.529+BA.*)											1	11
BF.1	VOC Omicron GRA (B.1.1.529+BA.*)						22	55	16	17	3	1
BF.1.1	VOC Omicron GRA (B.1.1.529+BA.*)						1	3
BF.11	VOC Omicron GRA (B.1.1.529+BA.*)							1	3	8	67	51	118
BF.11.1	VOC Omicron GRA (B.1.1.529+BA.*)							1			17	5	59
BF.11.3	VOC Omicron GRA (B.1.1.529+BA.*)								1	4	42	16	18
BF.11.4	VOC Omicron GRA (B.1.1.529+BA.*)										3	1
BF.12	VOC Omicron GRA (B.1.1.529+BA.*)							2	34	1
BF.13	VOC Omicron GRA (B.1.1.529+BA.*)									38	65	26	19
BF.14	VOC Omicron GRA (B.1.1.529+BA.*)										8	18	14
BF.15	VOC Omicron GRA (B.1.1.529+BA.*)							1	1
BF.2	VOC Omicron GRA (B.1.1.529+BA.*)						9	7	4	9	6	18	1
BF.20	VOC Omicron GRA (B.1.1.529+BA.*)							4
BF.23	VOC Omicron GRA (B.1.1.529+BA.*)										1
BF.25	VOC Omicron GRA (B.1.1.529+BA.*)								1	1	8	7	16
BF.3	VOC Omicron GRA (B.1.1.529+BA.*)						2	1		2	4
BF.3.1	VOC Omicron GRA (B.1.1.529+BA.*)							1
BF.31	VOC Omicron GRA (B.1.1.529+BA.*)										1
BF.31.1	VOC Omicron GRA (B.1.1.529+BA.*)										59	20
BF.32	VOC Omicron GRA (B.1.1.529+BA.*)											1	1
BF.34	VOC Omicron GRA (B.1.1.529+BA.*)												5
BF.36	VOC Omicron GRA (B.1.1.529+BA.*)						1	4	1	2			1
BF.38	VOC Omicron GRA (B.1.1.529+BA.*)									1	1
BF.39	VOC Omicron GRA (B.1.1.529+BA.*)						4	25	13	60	22	6	2
BF.4	VOC Omicron GRA (B.1.1.529+BA.*)						16	56	13	20	2	1
BF.41	VOC Omicron GRA (B.1.1.529+BA.*)						1	8	5	1	7
BF.5.5	VOC Omicron GRA (B.1.1.529+BA.*)										2
BF.6	VOC Omicron GRA (B.1.1.529+BA.*)						1	3	1	1
BF.7	VOC Omicron GRA (B.1.1.529+BA.*)						1	6	22	43	305	195	292
BF.7.12	VOC Omicron GRA (B.1.1.529+BA.*)										2	2
BF.7.14	VOC Omicron GRA (B.1.1.529+BA.*)												7
BF.7.14.1	VOC Omicron GRA (B.1.1.529+BA.*)												3
BF.7.16	VOC Omicron GRA (B.1.1.529+BA.*)								1	2	22	7	1
BF.7.16.1	VOC Omicron GRA (B.1.1.529+BA.*)										1	1	1
BF.7.19	VOC Omicron GRA (B.1.1.529+BA.*)									1	7	1
BF.7.20	VOC Omicron GRA (B.1.1.529+BA.*)									1	8	13	14
BF.7.21	VOC Omicron GRA (B.1.1.529+BA.*)										8	7	10
BF.7.22	VOC Omicron GRA (B.1.1.529+BA.*)										5	1	1
BF.7.23	VOC Omicron GRA (B.1.1.529+BA.*)										14	15	77
BF.7.24	VOC Omicron GRA (B.1.1.529+BA.*)											1	1
BF.7.27	VOC Omicron GRA (B.1.1.529+BA.*)									31	64	1	2
BF.7.3	VOC Omicron GRA (B.1.1.529+BA.*)										1
BF.7.4	VOC Omicron GRA (B.1.1.529+BA.*)							1	1	2	7	19	20
BF.7.4.1	VOC Omicron GRA (B.1.1.529+BA.*)								1	4	30	24	16
BF.7.4.2	VOC Omicron GRA (B.1.1.529+BA.*)										2	1
BF.7.5	VOC Omicron GRA (B.1.1.529+BA.*)									3	14	23	24
BF.7.6	VOC Omicron GRA (B.1.1.529+BA.*)									2	31	11	33
BF.7.7	VOC Omicron GRA (B.1.1.529+BA.*)									8	75	47	54
BF.7.8	VOC Omicron GRA (B.1.1.529+BA.*)										2		1
BF.8	VOC Omicron GRA (B.1.1.529+BA.*)						3	4	13	10	16	4
BG.2	VOC Omicron GRA (B.1.1.529+BA.*)					1	15	21	1
BG.4	VOC Omicron GRA (B.1.1.529+BA.*)						8	7
BH.1	VOC Omicron GRA (B.1.1.529+BA.*)							1	1		1
BK.1	VOC Omicron GRA (B.1.1.529+BA.*)						5	21	8	25	49	16	19
BL.1	VUM GRA (BA.2.75+BA.2.75.*)									6	2	3
BL.2	VUM GRA (BA.2.75+BA.2.75.*)								1	2	2
BL.3	VUM GRA (BA.2.75+BA.2.75.*)								1
BL.4	VUM GRA (BA.2.75+BA.2.75.*)								1
BL.5	VUM GRA (BA.2.75+BA.2.75.*)									2
BM.1	VUM GRA (BA.2.75+BA.2.75.*)								1
BM.1.1	VUM GRA (BA.2.75+BA.2.75.*)									1	6	1
BM.1.1.3	VUM GRA (BA.2.75+BA.2.75.*)									2	16	4
BM.1.1.4	VUM GRA (BA.2.75+BA.2.75.*)												1
BM.2.1	VUM GRA (BA.2.75+BA.2.75.*)									3	6
BN.1	VUM GRA (BA.2.75+BA.2.75.*)									2	4	8	52
BN.1.10	VUM GRA (BA.2.75+BA.2.75.*)												18
BN.1.2	VUM GRA (BA.2.75+BA.2.75.*)												9
BN.1.2.1	VUM GRA (BA.2.75+BA.2.75.*)											2	5
BN.1.2.3	VUM GRA (BA.2.75+BA.2.75.*)												1
BN.1.2.4	VUM GRA (BA.2.75+BA.2.75.*)											14	15
BN.1.3	VUM GRA (BA.2.75+BA.2.75.*)										12	20	22
BN.1.3.1	VUM GRA (BA.2.75+BA.2.75.*)											1	17
BN.1.3.5	VUM GRA (BA.2.75+BA.2.75.*)											2	21
BN.1.3.6	VUM GRA (BA.2.75+BA.2.75.*)											1	1
BN.1.4	VUM GRA (BA.2.75+BA.2.75.*)										1	1	3
BN.1.4.3	VUM GRA (BA.2.75+BA.2.75.*)										2
BN.1.5	VUM GRA (BA.2.75+BA.2.75.*)										1	5	6
BN.1.5.1	VUM GRA (BA.2.75+BA.2.75.*)												1
BN.1.5.2	VUM GRA (BA.2.75+BA.2.75.*)												1
BN.1.7	VUM GRA (BA.2.75+BA.2.75.*)												1
BN.1.9	VUM GRA (BA.2.75+BA.2.75.*)										2	1
BN.2	VUM GRA (BA.2.75+BA.2.75.*)								1	1
BN.2.1	VUM GRA (BA.2.75+BA.2.75.*)								1
BN.3.1	VUM GRA (BA.2.75+BA.2.75.*)										5	1	2
BN.4	VUM GRA (BA.2.75+BA.2.75.*)									1
BN.5	VUM GRA (BA.2.75+BA.2.75.*)								1		2
BN.6	VUM GRA (BA.2.75+BA.2.75.*)										2	2	2
BQ.1	VOC Omicron GRA (B.1.1.529+BA.*)								1	16	190	250	589
BQ.1.1.1	VOC Omicron GRA (B.1.1.529+BA.*)									2	2	22	101
BQ.1.1.10	VOC Omicron GRA (B.1.1.529+BA.*)											3	174
BQ.1.1.11	VOC Omicron GRA (B.1.1.529+BA.*)											1	7
BQ.1.1.13	VOC Omicron GRA (B.1.1.529+BA.*)												4
BQ.1.1.14	VOC Omicron GRA (B.1.1.529+BA.*)										1
BQ.1.1.15	VOC Omicron GRA (B.1.1.529+BA.*)											3	27
BQ.1.1.17	VOC Omicron GRA (B.1.1.529+BA.*)												1
BQ.1.1.18	VOC Omicron GRA (B.1.1.529+BA.*)										5	10	22
BQ.1.1.2	VOC Omicron GRA (B.1.1.529+BA.*)											3	4
BQ.1.1.23	VOC Omicron GRA (B.1.1.529+BA.*)										1	1	1
BQ.1.1.24	VOC Omicron GRA (B.1.1.529+BA.*)											1	1
BQ.1.1.25	VOC Omicron GRA (B.1.1.529+BA.*)											8	1
BQ.1.1.28	VOC Omicron GRA (B.1.1.529+BA.*)												2
BQ.1.1.3	VOC Omicron GRA (B.1.1.529+BA.*)											10	87
BQ.1.1.30	VOC Omicron GRA (B.1.1.529+BA.*)											15	53
BQ.1.1.32	VOC Omicron GRA (B.1.1.529+BA.*)												8
BQ.1.1.35	VOC Omicron GRA (B.1.1.529+BA.*)											2	16
BQ.1.1.36	VOC Omicron GRA (B.1.1.529+BA.*)											1
BQ.1.1.39	VOC Omicron GRA (B.1.1.529+BA.*)												10
BQ.1.1.4	VOC Omicron GRA (B.1.1.529+BA.*)										4	10	50
BQ.1.1.40	VOC Omicron GRA (B.1.1.529+BA.*)										10	41	135
BQ.1.1.41	VOC Omicron GRA (B.1.1.529+BA.*)												135
BQ.1.1.42	VOC Omicron GRA (B.1.1.529+BA.*)											4	34
BQ.1.1.43	VOC Omicron GRA (B.1.1.529+BA.*)												6
BQ.1.1.44	VOC Omicron GRA (B.1.1.529+BA.*)												1
BQ.1.1.47	VOC Omicron GRA (B.1.1.529+BA.*)										1		2
BQ.1.1.48	VOC Omicron GRA (B.1.1.529+BA.*)												1
BQ.1.1.5	VOC Omicron GRA (B.1.1.529+BA.*)										8	11	46
BQ.1.1.51	VOC Omicron GRA (B.1.1.529+BA.*)											1	19
BQ.1.1.52	VOC Omicron GRA (B.1.1.529+BA.*)											1	32
BQ.1.1.53	VOC Omicron GRA (B.1.1.529+BA.*)											2	2
BQ.1.1.54	VOC Omicron GRA (B.1.1.529+BA.*)											2	2
BQ.1.1.55	VOC Omicron GRA (B.1.1.529+BA.*)											1	7
BQ.1.1.6	VOC Omicron GRA (B.1.1.529+BA.*)										2	2	19
BQ.1.1.60	VOC Omicron GRA (B.1.1.529+BA.*)												3
BQ.1.1.63	VOC Omicron GRA (B.1.1.529+BA.*)												1
BQ.1.1.67	VOC Omicron GRA (B.1.1.529+BA.*)										2		27
BQ.1.1.68	VOC Omicron GRA (B.1.1.529+BA.*)											1	21
BQ.1.1.69	VOC Omicron GRA (B.1.1.529+BA.*)											9	15
BQ.1.1.7	VOC Omicron GRA (B.1.1.529+BA.*)										8	26	54
BQ.1.1.8	VOC Omicron GRA (B.1.1.529+BA.*)										1	4	19
BQ.1.10	VOC Omicron GRA (B.1.1.529+BA.*)									1	12	9	38
BQ.1.10.1	VOC Omicron GRA (B.1.1.529+BA.*)										5	28	112
BQ.1.11	VOC Omicron GRA (B.1.1.529+BA.*)										1	48	76
BQ.1.12	VOC Omicron GRA (B.1.1.529+BA.*)									1	29	56	87
BQ.1.13	VOC Omicron GRA (B.1.1.529+BA.*)										45	62	151
BQ.1.13.1	VOC Omicron GRA (B.1.1.529+BA.*)												14
BQ.1.14	VOC Omicron GRA (B.1.1.529+BA.*)									2	33	21	108
BQ.1.15	VOC Omicron GRA (B.1.1.529+BA.*)											2
BQ.1.15.1	VOC Omicron GRA (B.1.1.529+BA.*)											3	10
BQ.1.16	VOC Omicron GRA (B.1.1.529+BA.*)										50	3	1
BQ.1.18	VOC Omicron GRA (B.1.1.529+BA.*)											1	1
BQ.1.19	VOC Omicron GRA (B.1.1.529+BA.*)										27	3	2
BQ.1.2	VOC Omicron GRA (B.1.1.529+BA.*)									1	9	25	100
BQ.1.2.1	VOC Omicron GRA (B.1.1.529+BA.*)												2
BQ.1.2.3	VOC Omicron GRA (B.1.1.529+BA.*)								1	2	31	49	91
BQ.1.22	VOC Omicron GRA (B.1.1.529+BA.*)										28	5	17
BQ.1.23	VOC Omicron GRA (B.1.1.529+BA.*)										1	7	33
BQ.1.25	VOC Omicron GRA (B.1.1.529+BA.*)										5	7	9
BQ.1.25.1	VOC Omicron GRA (B.1.1.529+BA.*)												32
BQ.1.3	VOC Omicron GRA (B.1.1.529+BA.*)										1	2	6
BQ.1.3.1	VOC Omicron GRA (B.1.1.529+BA.*)										2	6	77
BQ.1.3.2	VOC Omicron GRA (B.1.1.529+BA.*)										9	6	18
BQ.1.30	VOC Omicron GRA (B.1.1.529+BA.*)										1	3	84
BQ.1.31	VOC Omicron GRA (B.1.1.529+BA.*)												1
BQ.1.4	VOC Omicron GRA (B.1.1.529+BA.*)												1
BQ.1.5	VOC Omicron GRA (B.1.1.529+BA.*)									2	28	76	111
BQ.1.6	VOC Omicron GRA (B.1.1.529+BA.*)											1	7
BQ.1.7	VOC Omicron GRA (B.1.1.529+BA.*)										1	2
BQ.1.8	VOC Omicron GRA (B.1.1.529+BA.*)									3	9	40	18
BQ.1.9	VOC Omicron GRA (B.1.1.529+BA.*)											1
BR.1	VUM GRA (BA.2.75+BA.2.75.*)											1
BR.1.2	VUM GRA (BA.2.75+BA.2.75.*)										3
BR.2.1	VUM GRA (BA.2.75+BA.2.75.*)										1	1	12
BR.4	VUM GRA (BA.2.75+BA.2.75.*)									3	3	1
BT.1	VOC Omicron GRA (B.1.1.529+BA.*)						2	4	1
BU.1	VOC Omicron GRA (B.1.1.529+BA.*)										3	2	7
BU.2	VOC Omicron GRA (B.1.1.529+BA.*)								5		1
BU.3	VOC Omicron GRA (B.1.1.529+BA.*)												2
BV.2	VOC Omicron GRA (B.1.1.529+BA.*)											1
BW.1	VOC Omicron GRA (B.1.1.529+BA.*)										1	2	4
BW.1.1	VOC Omicron GRA (B.1.1.529+BA.*)											1	19
BW.1.1.1	VOC Omicron GRA (B.1.1.529+BA.*)											1	10
BW.1.1.2	VOC Omicron GRA (B.1.1.529+BA.*)											3
BW.1.2	VOC Omicron GRA (B.1.1.529+BA.*)												3
BY.1	VUM GRA (BA.2.75+BA.2.75.*)									5	41	3	1
BY.1.2	VUM GRA (BA.2.75+BA.2.75.*)											8
CA.1	VUM GRA (BA.2.75+BA.2.75.*)											1
CA.3.1	VUM GRA (BA.2.75+BA.2.75.*)												3
CA.5	VUM GRA (BA.2.75+BA.2.75.*)											3	12
CA.7	VUM GRA (BA.2.75+BA.2.75.*)										3	1	9
CC.1	VOC Omicron GRA (B.1.1.529+BA.*)									3	14
CE.1	VOC Omicron GRA (B.1.1.529+BA.*)								1	10	4	3
CG.1	VOC Omicron GRA (B.1.1.529+BA.*)									1	13	4	2
CH.1.1	VUM GRA (CH.1.1+CH.1.1.*)											9	32
CH.1.1.11	VUM GRA (CH.1.1+CH.1.1.*)												5
CH.1.1.18	VUM GRA (CH.1.1+CH.1.1.*)												1
CH.1.1.2	VUM GRA (CH.1.1+CH.1.1.*)											1	2
CH.1.1.7	VUM GRA (CH.1.1+CH.1.1.*)											1
CJ.1.2	VUM GRA (BA.2.75+BA.2.75.*)										1
CK.1	VOC Omicron GRA (B.1.1.529+BA.*)										4	1	24
CK.1.3	VOC Omicron GRA (B.1.1.529+BA.*)												1
CK.1.4	VOC Omicron GRA (B.1.1.529+BA.*)											10	18
CK.1.5	VOC Omicron GRA (B.1.1.529+BA.*)											1	4
CK.2	VOC Omicron GRA (B.1.1.529+BA.*)												5
CK.2.1	VOC Omicron GRA (B.1.1.529+BA.*)												8
CK.2.1.1	VOC Omicron GRA (B.1.1.529+BA.*)										1	1	3
CK.3	VOC Omicron GRA (B.1.1.529+BA.*)										1	2	10
CL.1	VOC Omicron GRA (B.1.1.529+BA.*)										1	1
CL.1.3	VOC Omicron GRA (B.1.1.529+BA.*)												1
CM.1	VOC Omicron GRA (B.1.1.529+BA.*)									19	12	2	5
CM.10	VOC Omicron GRA (B.1.1.529+BA.*)												1
CM.2	VOC Omicron GRA (B.1.1.529+BA.*)									6	23	5	10
CM.4.1	VOC Omicron GRA (B.1.1.529+BA.*)											1	2
CM.8.1	VOC Omicron GRA (B.1.1.529+BA.*)												7
CM.8.1.4	VOC Omicron GRA (B.1.1.529+BA.*)												1
CM.9	VOC Omicron GRA (B.1.1.529+BA.*)										10
CN.1	VOC Omicron GRA (B.1.1.529+BA.*)										1	5	5
CN.2	VOC Omicron GRA (B.1.1.529+BA.*)										2	34	18
CP.1	VOC Omicron GRA (B.1.1.529+BA.*)									1	2	3	14
CP.8	VOC Omicron GRA (B.1.1.529+BA.*)										3	1
CQ.1.1	VOC Omicron GRA (B.1.1.529+BA.*)										4
CQ.2	VOC Omicron GRA (B.1.1.529+BA.*)											2	3
CR.1	VOC Omicron GRA (B.1.1.529+BA.*)										1
CR.1.1	VOC Omicron GRA (B.1.1.529+BA.*)										1
CR.1.2	VOC Omicron GRA (B.1.1.529+BA.*)									1	10	3
CT.1	VOC Omicron GRA (B.1.1.529+BA.*)												1
CV.1	VUM GRA (BA.2.75+BA.2.75.*)										3	5	2
CZ.2	VOC Omicron GRA (B.1.1.529+BA.*)										1	5	69
DC.1	VOC Omicron GRA (B.1.1.529+BA.*)											1
DE.1	VOC Omicron GRA (B.1.1.529+BA.*)						2	3	13	33	1		1
DE.2	VOC Omicron GRA (B.1.1.529+BA.*)											1
DF.1.1	VOC Omicron GRA (B.1.1.529+BA.*)										1	3	2
DJ.1.1	VOC Omicron GRA (B.1.1.529+BA.*)												6
DL.1	VOC Omicron GRA (B.1.1.529+BA.*)											1	2
DN.1.1	VOC Omicron GRA (B.1.1.529+BA.*)											1
DN.2	VOC Omicron GRA (B.1.1.529+BA.*)												1
DS.1	VUM GRA (BA.2.75+BA.2.75.*)												1
DT.2	VOC Omicron GRA (B.1.1.529+BA.*)												1
DV.1	VUM GRA (CH.1.1+CH.1.1.*)												1
DV.6	VUM GRA (CH.1.1+CH.1.1.*)												1
DY.2	VOC Omicron GRA (B.1.1.529+BA.*)												2
DY.3	VOC Omicron GRA (B.1.1.529+BA.*)												1
EB.1	VOC Omicron GRA (B.1.1.529+BA.*)									1	3		1
ED.2	VOC Omicron GRA (B.1.1.529+BA.*)										1	1	6
ED.3	VOC Omicron GRA (B.1.1.529+BA.*)												1
EE.1	VOC Omicron GRA (B.1.1.529+BA.*)										2	5	19
EE.2	VOC Omicron GRA (B.1.1.529+BA.*)											1	10
EE.3	VOC Omicron GRA (B.1.1.529+BA.*)										3	4	29
EE.4	VOC Omicron GRA (B.1.1.529+BA.*)												2
EE.5	VOC Omicron GRA (B.1.1.529+BA.*)												9
EF.1	VOC Omicron GRA (B.1.1.529+BA.*)												3
EF.1.1	VOC Omicron GRA (B.1.1.529+BA.*)												1
EF.1.2	VOC Omicron GRA (B.1.1.529+BA.*)												1
EF.2	VOC Omicron GRA (B.1.1.529+BA.*)										1
ES.1	VOC Omicron GRA (B.1.1.529+BA.*)												1
Unassigned	VOC Omicron GRA (B.1.1.529+BA.*)	1		2	1
Unassigned			1
XAC	VOC Omicron GRA (B.1.1.529+BA.*)				3	5	8					1
XAF	VOC Omicron GRA (B.1.1.529+BA.*)						1
XAM	VOC Omicron GRA (B.1.1.529+BA.*)						1	2
XAN	VOC Omicron GRA (B.1.1.529+BA.*)							2
XAP	VOC Omicron GRA (B.1.1.529+BA.*)						2
XAQ	VOC Omicron GRA (B.1.1.529+BA.*)					1
XAS	VOC Omicron GRA (B.1.1.529+BA.*)							15
XAV	VOC Omicron GRA (B.1.1.529+BA.*)							3
XAZ	VOC Omicron GRA (B.1.1.529+BA.*)							10	1	17	6
XBB	VUM GRA (XBB+XBB.* excluding XBB.1.5, XBB.1.16, XBB.1.9.1, XBB.1.9.2, XBB.2.3)									2	12	13	13
XBB.1.1	VUM GRA (XBB+XBB.* excluding XBB.1.5, XBB.1.16, XBB.1.9.1, XBB.1.9.2, XBB.2.3)											1	3
XBB.1.10	VUM GRA (XBB+XBB.* excluding XBB.1.5, XBB.1.16, XBB.1.9.1, XBB.1.9.2, XBB.2.3)												2
XBB.1.15	VUM GRA (XBB+XBB.* excluding XBB.1.5, XBB.1.16, XBB.1.9.1, XBB.1.9.2, XBB.2.3)												13
XBB.1.3	VUM GRA (XBB+XBB.* excluding XBB.1.5, XBB.1.16, XBB.1.9.1, XBB.1.9.2, XBB.2.3)											1
XBB.1.32	VUM GRA (XBB+XBB.* excluding XBB.1.5, XBB.1.16, XBB.1.9.1, XBB.1.9.2, XBB.2.3)												5
XBB.1.4	VUM GRA (XBB+XBB.* excluding XBB.1.5, XBB.1.16, XBB.1.9.1, XBB.1.9.2, XBB.2.3)												2
XBB.1.5.13	VOI GRA (XBB.1.5+XBB.1.5.*)												1
XBB.1.5.17	VOI GRA (XBB.1.5+XBB.1.5.*)												1
XBB.1.5.20	VOI GRA (XBB.1.5+XBB.1.5.*)												5
XBB.1.5.31	VOI GRA (XBB.1.5+XBB.1.5.*)												1
XBB.1.5.32	VOI GRA (XBB.1.5+XBB.1.5.*)												6
XBB.1.5.33	VOI GRA (XBB.1.5+XBB.1.5.*)												1
XBB.1.5.48	VOI GRA (XBB.1.5+XBB.1.5.*)												1
XBB.1.5.51	VOI GRA (XBB.1.5+XBB.1.5.*)												1
XBB.1.5.52	VOI GRA (XBB.1.5+XBB.1.5.*)												2
XBB.1.5.57	VOI GRA (XBB.1.5+XBB.1.5.*)												11
XBB.1.5.67	VOI GRA (XBB.1.5+XBB.1.5.*)												2
XBB.1.5.7	VOI GRA (XBB.1.5+XBB.1.5.*)											1	10
XBB.1.5.80	VOI GRA (XBB.1.5+XBB.1.5.*)												1
XBB.1.5.9	VOI GRA (XBB.1.5+XBB.1.5.*)												1
XBB.2	VUM GRA (XBB+XBB.* excluding XBB.1.5, XBB.1.16, XBB.1.9.1, XBB.1.9.2, XBB.2.3)										1	1
XBB.2.11	VUM GRA (XBB+XBB.* excluding XBB.1.5, XBB.1.16, XBB.1.9.1, XBB.1.9.2, XBB.2.3)												6
XBB.2.11.1	VUM GRA (XBB+XBB.* excluding XBB.1.5, XBB.1.16, XBB.1.9.1, XBB.1.9.2, XBB.2.3)												1
XBB.2.5	VUM GRA (XBB+XBB.* excluding XBB.1.5, XBB.1.16, XBB.1.9.1, XBB.1.9.2, XBB.2.3)											1
XBB.2.6	VUM GRA (XBB+XBB.* excluding XBB.1.5, XBB.1.16, XBB.1.9.1, XBB.1.9.2, XBB.2.3)										1	2	5
XBB.2.8	VUM GRA (XBB+XBB.* excluding XBB.1.5, XBB.1.16, XBB.1.9.1, XBB.1.9.2, XBB.2.3)												2
XBB.3	VUM GRA (XBB+XBB.* excluding XBB.1.5, XBB.1.16, XBB.1.9.1, XBB.1.9.2, XBB.2.3)									1	3		2
XBB.8	VUM GRA (XBB+XBB.* excluding XBB.1.5, XBB.1.16, XBB.1.9.1, XBB.1.9.2, XBB.2.3)										3		1
XBD	VOC Omicron GRA (B.1.1.529+BA.*)										1
XBE	VOC Omicron GRA (B.1.1.529+BA.*)									1	3
XBF	VOC Omicron GRA (B.1.1.529+BA.*)											1	2
XBF.3	VOC Omicron GRA (B.1.1.529+BA.*)												2
XBF.6	VOC Omicron GRA (B.1.1.529+BA.*)												1
XBF.7	VOC Omicron GRA (B.1.1.529+BA.*)												1
XBH	VOC Omicron GRA (B.1.1.529+BA.*)										1
XBM	VOC Omicron GRA (B.1.1.529+BA.*)										2	12	52
XBN	VOC Omicron GRA (B.1.1.529+BA.*)												1
XBP	VOC Omicron GRA (B.1.1.529+BA.*)											4
XBV	VOC Omicron GRA (B.1.1.529+BA.*)												1
XCG	VOC Omicron GRA (B.1.1.529+BA.*)											1
XE	VOC Omicron GRA (B.1.1.529+BA.*)				1						1
XN	VOC Omicron GRA (B.1.1.529+BA.*)			1
XW	VOC Omicron GRA (B.1.1.529+BA.*)			2	1

## Sheet: Central
Pango.lineage	Variant	2022-1	2022-2	2022-3	2022-4	2022-5	2022-6	2022-7	2022-8	2022-9	2022-10	2022-11	2022-12
AY.100	VOC Delta GK (B.1.617.2+AY.*)	1
AY.117	VOC Delta GK (B.1.617.2+AY.*)	1
AY.25.1	VOC Delta GK (B.1.617.2+AY.*)	1
BA.1.1.10	VOC Omicron GRA (B.1.1.529+BA.*)		1
BA.1.1.14	VOC Omicron GRA (B.1.1.529+BA.*)		3	1
BA.1.1.2	VOC Omicron GRA (B.1.1.529+BA.*)		1
BA.1.15.2	VOC Omicron GRA (B.1.1.529+BA.*)				1
BA.1.17	VOC Omicron GRA (B.1.1.529+BA.*)	2
BA.1.18	VOC Omicron GRA (B.1.1.529+BA.*)	2
BA.1.20	VOC Omicron GRA (B.1.1.529+BA.*)	3
BA.2.10	VOC Omicron GRA (B.1.1.529+BA.*)			1
BA.2.13	VOC Omicron GRA (B.1.1.529+BA.*)						1
BA.2.20	VOC Omicron GRA (B.1.1.529+BA.*)				1	1	1
BA.2.3.17	VOC Omicron GRA (B.1.1.529+BA.*)			2	1
BA.2.7	VOC Omicron GRA (B.1.1.529+BA.*)			2	1
BA.2.75.5	VUM GRA (BA.2.75+BA.2.75.*)											1
BA.4.6.2	VOC Omicron GRA (B.1.1.529+BA.*)									1
BA.5.1.10	VOC Omicron GRA (B.1.1.529+BA.*)								1	1		1
BA.5.1.15	VOC Omicron GRA (B.1.1.529+BA.*)								3
BA.5.1.18	VOC Omicron GRA (B.1.1.529+BA.*)												1
BA.5.1.21	VOC Omicron GRA (B.1.1.529+BA.*)								1
BA.5.1.23	VOC Omicron GRA (B.1.1.529+BA.*)								2	2
BA.5.1.33	VOC Omicron GRA (B.1.1.529+BA.*)										1
BA.5.1.5	VOC Omicron GRA (B.1.1.529+BA.*)										1
BA.5.1.6	VOC Omicron GRA (B.1.1.529+BA.*)								1
BA.5.10	VOC Omicron GRA (B.1.1.529+BA.*)											1
BA.5.2.22	VOC Omicron GRA (B.1.1.529+BA.*)								1
BA.5.2.26	VOC Omicron GRA (B.1.1.529+BA.*)									1
BA.5.2.31	VOC Omicron GRA (B.1.1.529+BA.*)										2
BA.5.2.34	VOC Omicron GRA (B.1.1.529+BA.*)										3
BA.5.2.35	VOC Omicron GRA (B.1.1.529+BA.*)										1
BA.5.2.6	VOC Omicron GRA (B.1.1.529+BA.*)								1			1
BA.5.2.62	VOC Omicron GRA (B.1.1.529+BA.*)										1
BA.5.5.1	VOC Omicron GRA (B.1.1.529+BA.*)								1		1
BA.5.9	VOC Omicron GRA (B.1.1.529+BA.*)										1	2
BE.1.3	VOC Omicron GRA (B.1.1.529+BA.*)									1
BE.1.4	VOC Omicron GRA (B.1.1.529+BA.*)									2	2
BE.1.4.1	VOC Omicron GRA (B.1.1.529+BA.*)										1
BF.1.1	VOC Omicron GRA (B.1.1.529+BA.*)							1
BF.13	VOC Omicron GRA (B.1.1.529+BA.*)										2
BF.3.1	VOC Omicron GRA (B.1.1.529+BA.*)									1
BF.41	VOC Omicron GRA (B.1.1.529+BA.*)							1
BF.7	VOC Omicron GRA (B.1.1.529+BA.*)									9	1	3
BF.7.27	VOC Omicron GRA (B.1.1.529+BA.*)									1
BF.7.4	VOC Omicron GRA (B.1.1.529+BA.*)										1
BF.7.4.1	VOC Omicron GRA (B.1.1.529+BA.*)									1
BF.7.8	VOC Omicron GRA (B.1.1.529+BA.*)								1	1	1
BQ.1	VOC Omicron GRA (B.1.1.529+BA.*)											5
BQ.1.1.18	VOC Omicron GRA (B.1.1.529+BA.*)												1
BQ.1.1.41	VOC Omicron GRA (B.1.1.529+BA.*)											1
BQ.1.1.51	VOC Omicron GRA (B.1.1.529+BA.*)												1
BQ.1.10	VOC Omicron GRA (B.1.1.529+BA.*)												1
BQ.1.14	VOC Omicron GRA (B.1.1.529+BA.*)											1
BQ.1.2	VOC Omicron GRA (B.1.1.529+BA.*)									1	1		4
BQ.1.3.2	VOC Omicron GRA (B.1.1.529+BA.*)										2
CA.1	VUM GRA (BA.2.75+BA.2.75.*)									3	5
CK.2	VOC Omicron GRA (B.1.1.529+BA.*)										1	3
CN.2	VOC Omicron GRA (B.1.1.529+BA.*)									1
CP.1	VOC Omicron GRA (B.1.1.529+BA.*)									1	2
CQ.2	VOC Omicron GRA (B.1.1.529+BA.*)												1
DN.2	VOC Omicron GRA (B.1.1.529+BA.*)												1
EB.1	VOC Omicron GRA (B.1.1.529+BA.*)											1
EE.1	VOC Omicron GRA (B.1.1.529+BA.*)												1
EE.3	VOC Omicron GRA (B.1.1.529+BA.*)												2
EF.1	VOC Omicron GRA (B.1.1.529+BA.*)												2
XBB.1.15	VUM GRA (XBB+XBB.* excluding XBB.1.5, XBB.1.16, XBB.1.9.1, XBB.1.9.2, XBB.2.3)											2
XBB.1.5.15	VOI GRA (XBB.1.5+XBB.1.5.*)												1
XBB.1.5.9	VOI GRA (XBB.1.5+XBB.1.5.*)												1
XBB.6.1	VUM GRA (XBB+XBB.* excluding XBB.1.5, XBB.1.16, XBB.1.9.1, XBB.1.9.2, XBB.2.3)												2

## Sheet: Finger 
Pango.lineage	Variant	2022-1	2022-2	2022-3	2022-4	2022-5	2022-6	2022-7	2022-8	2022-9	2022-10	2022-11	2022-12
AY.100	VOC Delta GK (B.1.617.2+AY.*)	2
AY.103	VOC Delta GK (B.1.617.2+AY.*)	9								2
AY.110	VOC Delta GK (B.1.617.2+AY.*)	1
AY.117	VOC Delta GK (B.1.617.2+AY.*)	1
AY.118	VOC Delta GK (B.1.617.2+AY.*)	1
AY.119	VOC Delta GK (B.1.617.2+AY.*)	1								1
AY.122	VOC Delta GK (B.1.617.2+AY.*)	2
AY.127	VOC Delta GK (B.1.617.2+AY.*)	1
AY.25	VOC Delta GK (B.1.617.2+AY.*)	1								1
AY.25.1	VOC Delta GK (B.1.617.2+AY.*)	2
AY.3	VOC Delta GK (B.1.617.2+AY.*)	4	1							1
AY.3.1	VOC Delta GK (B.1.617.2+AY.*)	3
AY.39	VOC Delta GK (B.1.617.2+AY.*)	1
AY.39.1	VOC Delta GK (B.1.617.2+AY.*)	2								1
AY.4	VOC Delta GK (B.1.617.2+AY.*)	1
AY.43.3	VOC Delta GK (B.1.617.2+AY.*)	8								1
AY.47	VOC Delta GK (B.1.617.2+AY.*)	2
AY.75	VOC Delta GK (B.1.617.2+AY.*)	1
B.1.617.2	VOC Delta GK (B.1.617.2+AY.*)	1
BA.1.1.1	VOC Omicron GRA (B.1.1.529+BA.*)	2	1
BA.1.1.12	VOC Omicron GRA (B.1.1.529+BA.*)		1
BA.1.1.14	VOC Omicron GRA (B.1.1.529+BA.*)	6	7	1
BA.1.1.2	VOC Omicron GRA (B.1.1.529+BA.*)	2		2	1
BA.1.1.8	VOC Omicron GRA (B.1.1.529+BA.*)	1
BA.1.10	VOC Omicron GRA (B.1.1.529+BA.*)		1
BA.1.17	VOC Omicron GRA (B.1.1.529+BA.*)	2	1
BA.1.18	VOC Omicron GRA (B.1.1.529+BA.*)	7	3
BA.1.20	VOC Omicron GRA (B.1.1.529+BA.*)	16	2	1
BA.1.6	VOC Omicron GRA (B.1.1.529+BA.*)	3	4
BA.2.10	VOC Omicron GRA (B.1.1.529+BA.*)			5
BA.2.13	VOC Omicron GRA (B.1.1.529+BA.*)					4	1
BA.2.13.1	VOC Omicron GRA (B.1.1.529+BA.*)							1
BA.2.20	VOC Omicron GRA (B.1.1.529+BA.*)			1		1
BA.2.23	VOC Omicron GRA (B.1.1.529+BA.*)				1		1
BA.2.28	VOC Omicron GRA (B.1.1.529+BA.*)				1
BA.2.3.17	VOC Omicron GRA (B.1.1.529+BA.*)						1
BA.2.3.20	VOC Omicron GRA (B.1.1.529+BA.*)											1
BA.2.3.4	VOC Omicron GRA (B.1.1.529+BA.*)				2
BA.2.3.9	VOC Omicron GRA (B.1.1.529+BA.*)							2
BA.2.37	VOC Omicron GRA (B.1.1.529+BA.*)					1
BA.2.40.1	VOC Omicron GRA (B.1.1.529+BA.*)					1
BA.2.48	VOC Omicron GRA (B.1.1.529+BA.*)						1
BA.2.5	VOC Omicron GRA (B.1.1.529+BA.*)				1
BA.2.53	VOC Omicron GRA (B.1.1.529+BA.*)					1
BA.2.56	VOC Omicron GRA (B.1.1.529+BA.*)					1
BA.2.60	VOC Omicron GRA (B.1.1.529+BA.*)				1
BA.2.7	VOC Omicron GRA (B.1.1.529+BA.*)			3	4	3
BA.2.72	VOC Omicron GRA (B.1.1.529+BA.*)			1
BA.2.74	VOC Omicron GRA (B.1.1.529+BA.*)						1
BA.2.75.1	VUM GRA (BA.2.75+BA.2.75.*)							1
BA.2.75.10	VUM GRA (BA.2.75+BA.2.75.*)							10
BA.2.75.2	VUM GRA (BA.2.75+BA.2.75.*)								1
BA.2.75.5	VUM GRA (BA.2.75+BA.2.75.*)											1
BA.2.9.2	VOC Omicron GRA (B.1.1.529+BA.*)			1				1
BA.4.6.2	VOC Omicron GRA (B.1.1.529+BA.*)										2
BA.5.1.10	VOC Omicron GRA (B.1.1.529+BA.*)						1	4	14	18	14	4
BA.5.1.12	VOC Omicron GRA (B.1.1.529+BA.*)									4	2
BA.5.1.15	VOC Omicron GRA (B.1.1.529+BA.*)							3
BA.5.1.17	VOC Omicron GRA (B.1.1.529+BA.*)									1
BA.5.1.18	VOC Omicron GRA (B.1.1.529+BA.*)							1	1	5	17	29	17
BA.5.1.19	VOC Omicron GRA (B.1.1.529+BA.*)									3
BA.5.1.2	VOC Omicron GRA (B.1.1.529+BA.*)							4	1	1	8
BA.5.1.20	VOC Omicron GRA (B.1.1.529+BA.*)							1
BA.5.1.23	VOC Omicron GRA (B.1.1.529+BA.*)						1	6	11	2	6
BA.5.1.24	VOC Omicron GRA (B.1.1.529+BA.*)							1	4	4	1
BA.5.1.25	VOC Omicron GRA (B.1.1.529+BA.*)					1		1	2	3	1
BA.5.1.27	VOC Omicron GRA (B.1.1.529+BA.*)										1	1	3
BA.5.1.28	VOC Omicron GRA (B.1.1.529+BA.*)								1		2	1	7
BA.5.1.3	VOC Omicron GRA (B.1.1.529+BA.*)						1	3		7
BA.5.1.33	VOC Omicron GRA (B.1.1.529+BA.*)									3
BA.5.1.5	VOC Omicron GRA (B.1.1.529+BA.*)								2	1	6	3	2
BA.5.1.6	VOC Omicron GRA (B.1.1.529+BA.*)								2		3	1
BA.5.1.7	VOC Omicron GRA (B.1.1.529+BA.*)							1		1	1
BA.5.10	VOC Omicron GRA (B.1.1.529+BA.*)								1		1
BA.5.2.13	VOC Omicron GRA (B.1.1.529+BA.*)										2		1
BA.5.2.14	VOC Omicron GRA (B.1.1.529+BA.*)											1
BA.5.2.18	VOC Omicron GRA (B.1.1.529+BA.*)									3	10	4	1
BA.5.2.19	VOC Omicron GRA (B.1.1.529+BA.*)								1		1
BA.5.2.2	VOC Omicron GRA (B.1.1.529+BA.*)								1
BA.5.2.22	VOC Omicron GRA (B.1.1.529+BA.*)						1		2	5	2
BA.5.2.23	VOC Omicron GRA (B.1.1.529+BA.*)										2		1
BA.5.2.24	VOC Omicron GRA (B.1.1.529+BA.*)								1
BA.5.2.25	VOC Omicron GRA (B.1.1.529+BA.*)										1
BA.5.2.26	VOC Omicron GRA (B.1.1.529+BA.*)										4
BA.5.2.27	VOC Omicron GRA (B.1.1.529+BA.*)								1	2
BA.5.2.28	VOC Omicron GRA (B.1.1.529+BA.*)							1	2
BA.5.2.3	VOC Omicron GRA (B.1.1.529+BA.*)						1	6			1	1
BA.5.2.31	VOC Omicron GRA (B.1.1.529+BA.*)								2	7	5
BA.5.2.34	VOC Omicron GRA (B.1.1.529+BA.*)										1	5	2
BA.5.2.35	VOC Omicron GRA (B.1.1.529+BA.*)										4	29	12
BA.5.2.39	VOC Omicron GRA (B.1.1.529+BA.*)									4
BA.5.2.53	VOC Omicron GRA (B.1.1.529+BA.*)												1
BA.5.2.57	VOC Omicron GRA (B.1.1.529+BA.*)								1	1	3	1
BA.5.2.59	VOC Omicron GRA (B.1.1.529+BA.*)										1	2
BA.5.2.6	VOC Omicron GRA (B.1.1.529+BA.*)										9	7	11
BA.5.2.60	VOC Omicron GRA (B.1.1.529+BA.*)											1	1
BA.5.2.7	VOC Omicron GRA (B.1.1.529+BA.*)								1
BA.5.3.1	VOC Omicron GRA (B.1.1.529+BA.*)								1
BA.5.5.1	VOC Omicron GRA (B.1.1.529+BA.*)							7	8	10	13	6	1
BA.5.6.2	VOC Omicron GRA (B.1.1.529+BA.*)							2	5	5	18
BA.5.6.3	VOC Omicron GRA (B.1.1.529+BA.*)									1
BA.5.9	VOC Omicron GRA (B.1.1.529+BA.*)							1			3
BE.1.1.1	VOC Omicron GRA (B.1.1.529+BA.*)												1
BE.1.1.2	VOC Omicron GRA (B.1.1.529+BA.*)								1	1	2	2
BE.1.2	VOC Omicron GRA (B.1.1.529+BA.*)									5	7	4
BE.1.2.1	VOC Omicron GRA (B.1.1.529+BA.*)										2
BE.1.4	VOC Omicron GRA (B.1.1.529+BA.*)							2	7	7	3
BE.1.4.1	VOC Omicron GRA (B.1.1.529+BA.*)						1		1	1	11	1
BE.1.4.2	VOC Omicron GRA (B.1.1.529+BA.*)									2	1
BE.10	VOC Omicron GRA (B.1.1.529+BA.*)										1
BE.2	VOC Omicron GRA (B.1.1.529+BA.*)							1
BE.4	VOC Omicron GRA (B.1.1.529+BA.*)										1
BE.4.1	VOC Omicron GRA (B.1.1.529+BA.*)												1
BF.1	VOC Omicron GRA (B.1.1.529+BA.*)							8
BF.11	VOC Omicron GRA (B.1.1.529+BA.*)							1	2	3	9	14
BF.11.1	VOC Omicron GRA (B.1.1.529+BA.*)											1
BF.11.5	VOC Omicron GRA (B.1.1.529+BA.*)										1	6	13
BF.13	VOC Omicron GRA (B.1.1.529+BA.*)							1	3	7	10	7	5
BF.14	VOC Omicron GRA (B.1.1.529+BA.*)									1	2	2
BF.2	VOC Omicron GRA (B.1.1.529+BA.*)									1	1
BF.25	VOC Omicron GRA (B.1.1.529+BA.*)										1	2
BF.3	VOC Omicron GRA (B.1.1.529+BA.*)								2	1		1
BF.31	VOC Omicron GRA (B.1.1.529+BA.*)								1
BF.32	VOC Omicron GRA (B.1.1.529+BA.*)									6	14	1
BF.39	VOC Omicron GRA (B.1.1.529+BA.*)								1	1
BF.4	VOC Omicron GRA (B.1.1.529+BA.*)						2	4	1
BF.41	VOC Omicron GRA (B.1.1.529+BA.*)								1
BF.5.5	VOC Omicron GRA (B.1.1.529+BA.*)										1
BF.6	VOC Omicron GRA (B.1.1.529+BA.*)							1
BF.7	VOC Omicron GRA (B.1.1.529+BA.*)								1	13	30	28	9
BF.7.10	VOC Omicron GRA (B.1.1.529+BA.*)												1
BF.7.12	VOC Omicron GRA (B.1.1.529+BA.*)										1
BF.7.19	VOC Omicron GRA (B.1.1.529+BA.*)											7
BF.7.20	VOC Omicron GRA (B.1.1.529+BA.*)											1	4
BF.7.21	VOC Omicron GRA (B.1.1.529+BA.*)										1
BF.7.27	VOC Omicron GRA (B.1.1.529+BA.*)								1		7	2
BF.7.4	VOC Omicron GRA (B.1.1.529+BA.*)								1		6	3	1
BF.7.4.1	VOC Omicron GRA (B.1.1.529+BA.*)									3	4	1	4
BF.7.5	VOC Omicron GRA (B.1.1.529+BA.*)								1
BF.7.6	VOC Omicron GRA (B.1.1.529+BA.*)										1	4
BF.7.7	VOC Omicron GRA (B.1.1.529+BA.*)										1
BF.7.8	VOC Omicron GRA (B.1.1.529+BA.*)						17	6	5	3	3
BH.1	VOC Omicron GRA (B.1.1.529+BA.*)								1
BK.1	VOC Omicron GRA (B.1.1.529+BA.*)							2	3				1
BL.1	VUM GRA (BA.2.75+BA.2.75.*)								1
BM.1.1.3	VUM GRA (BA.2.75+BA.2.75.*)											1
BM.2	VUM GRA (BA.2.75+BA.2.75.*)										8	4	1
BM.2.1	VUM GRA (BA.2.75+BA.2.75.*)										2
BM.4.1	VUM GRA (BA.2.75+BA.2.75.*)									2	7	2	2
BN.1.2	VUM GRA (BA.2.75+BA.2.75.*)											1
BN.1.3	VUM GRA (BA.2.75+BA.2.75.*)											4	11
BN.1.3.1	VUM GRA (BA.2.75+BA.2.75.*)											1
BN.1.5	VUM GRA (BA.2.75+BA.2.75.*)											4	1
BN.3.1	VUM GRA (BA.2.75+BA.2.75.*)												2
BQ.1	VOC Omicron GRA (B.1.1.529+BA.*)									1	40	77	81
BQ.1.1.1	VOC Omicron GRA (B.1.1.529+BA.*)											9	5
BQ.1.1.10	VOC Omicron GRA (B.1.1.529+BA.*)												3
BQ.1.1.15	VOC Omicron GRA (B.1.1.529+BA.*)											2	1
BQ.1.1.18	VOC Omicron GRA (B.1.1.529+BA.*)												2
BQ.1.1.2	VOC Omicron GRA (B.1.1.529+BA.*)											1	19
BQ.1.1.3	VOC Omicron GRA (B.1.1.529+BA.*)										3	2	5
BQ.1.1.4	VOC Omicron GRA (B.1.1.529+BA.*)												1
BQ.1.1.41	VOC Omicron GRA (B.1.1.529+BA.*)											1	2
BQ.1.1.5	VOC Omicron GRA (B.1.1.529+BA.*)												1
BQ.1.1.51	VOC Omicron GRA (B.1.1.529+BA.*)											1
BQ.1.1.52	VOC Omicron GRA (B.1.1.529+BA.*)										2	3	2
BQ.1.1.63	VOC Omicron GRA (B.1.1.529+BA.*)												4
BQ.1.1.67	VOC Omicron GRA (B.1.1.529+BA.*)												3
BQ.1.1.68	VOC Omicron GRA (B.1.1.529+BA.*)											1	4
BQ.1.1.69	VOC Omicron GRA (B.1.1.529+BA.*)											5	4
BQ.1.1.7	VOC Omicron GRA (B.1.1.529+BA.*)										1		4
BQ.1.10	VOC Omicron GRA (B.1.1.529+BA.*)										3	7	3
BQ.1.11	VOC Omicron GRA (B.1.1.529+BA.*)											6	12
BQ.1.12	VOC Omicron GRA (B.1.1.529+BA.*)									1	2		2
BQ.1.13	VOC Omicron GRA (B.1.1.529+BA.*)											8	3
BQ.1.14	VOC Omicron GRA (B.1.1.529+BA.*)									2	3	3	7
BQ.1.15	VOC Omicron GRA (B.1.1.529+BA.*)											1	1
BQ.1.2.3	VOC Omicron GRA (B.1.1.529+BA.*)											3	2
BQ.1.23	VOC Omicron GRA (B.1.1.529+BA.*)											1	2
BQ.1.25	VOC Omicron GRA (B.1.1.529+BA.*)												4
BQ.1.3	VOC Omicron GRA (B.1.1.529+BA.*)												2
BQ.1.3.1	VOC Omicron GRA (B.1.1.529+BA.*)										3	3
BQ.1.3.2	VOC Omicron GRA (B.1.1.529+BA.*)								1	1	2	4	9
BQ.1.4	VOC Omicron GRA (B.1.1.529+BA.*)										1	2	1
BQ.1.6	VOC Omicron GRA (B.1.1.529+BA.*)										2	1
BQ.1.7	VOC Omicron GRA (B.1.1.529+BA.*)										4	2	4
BQ.1.8	VOC Omicron GRA (B.1.1.529+BA.*)										2	5	4
BR.1	VUM GRA (BA.2.75+BA.2.75.*)									5	4	1
BR.1.2	VUM GRA (BA.2.75+BA.2.75.*)											1
BR.2	VUM GRA (BA.2.75+BA.2.75.*)												4
BT.1	VOC Omicron GRA (B.1.1.529+BA.*)							1
BU.1	VOC Omicron GRA (B.1.1.529+BA.*)									1	1	8	1
BU.3	VOC Omicron GRA (B.1.1.529+BA.*)										3
BY.1	VUM GRA (BA.2.75+BA.2.75.*)										3
BY.1.1	VUM GRA (BA.2.75+BA.2.75.*)										1
BZ.2	VOC Omicron GRA (B.1.1.529+BA.*)										1
CA.1	VUM GRA (BA.2.75+BA.2.75.*)									7	9	10	5
CA.5	VUM GRA (BA.2.75+BA.2.75.*)												1
CA.7	VUM GRA (BA.2.75+BA.2.75.*)												5
CE.1	VOC Omicron GRA (B.1.1.529+BA.*)									1
CH.1.1	VUM GRA (CH.1.1+CH.1.1.*)												2
CH.1.1.25	VUM GRA (CH.1.1+CH.1.1.*)											1	2
CK.1	VOC Omicron GRA (B.1.1.529+BA.*)									2	3	9	14
CK.1.3	VOC Omicron GRA (B.1.1.529+BA.*)												1
CK.1.4	VOC Omicron GRA (B.1.1.529+BA.*)												3
CK.2	VOC Omicron GRA (B.1.1.529+BA.*)										1
CK.2.1	VOC Omicron GRA (B.1.1.529+BA.*)										1
CK.2.1.1	VOC Omicron GRA (B.1.1.529+BA.*)												3
CL.1	VOC Omicron GRA (B.1.1.529+BA.*)											1	2
CM.1	VOC Omicron GRA (B.1.1.529+BA.*)										2
CM.5.2	VOC Omicron GRA (B.1.1.529+BA.*)											1
CM.8.1	VOC Omicron GRA (B.1.1.529+BA.*)											1
CN.2	VOC Omicron GRA (B.1.1.529+BA.*)									1	39	14	9
CP.1	VOC Omicron GRA (B.1.1.529+BA.*)										11	2	3
CP.6	VOC Omicron GRA (B.1.1.529+BA.*)											1
CQ.1.1	VOC Omicron GRA (B.1.1.529+BA.*)												1
CQ.2	VOC Omicron GRA (B.1.1.529+BA.*)												2
CR.1.1	VOC Omicron GRA (B.1.1.529+BA.*)											1
DC.1	VOC Omicron GRA (B.1.1.529+BA.*)										4	1
DF.1	VOC Omicron GRA (B.1.1.529+BA.*)										1
DL.1	VOC Omicron GRA (B.1.1.529+BA.*)												1
DN.2	VOC Omicron GRA (B.1.1.529+BA.*)										4	2	3
ED.2	VOC Omicron GRA (B.1.1.529+BA.*)											4	10
ED.3	VOC Omicron GRA (B.1.1.529+BA.*)												1
EE.1	VOC Omicron GRA (B.1.1.529+BA.*)												1
EE.2	VOC Omicron GRA (B.1.1.529+BA.*)												5
EE.3	VOC Omicron GRA (B.1.1.529+BA.*)											1	2
EE.5	VOC Omicron GRA (B.1.1.529+BA.*)												1
EF.1.1	VOC Omicron GRA (B.1.1.529+BA.*)												1
EW.2	VOC Omicron GRA (B.1.1.529+BA.*)												1
FD.4	VOI GRA (XBB.1.5+XBB.1.5.*)												1
XAZ	VOC Omicron GRA (B.1.1.529+BA.*)										1
XBB.1.11	VUM GRA (XBB+XBB.* excluding XBB.1.5, XBB.1.16, XBB.1.9.1, XBB.1.9.2, XBB.2.3)											1
XBB.1.15	VUM GRA (XBB+XBB.* excluding XBB.1.5, XBB.1.16, XBB.1.9.1, XBB.1.9.2, XBB.2.3)											2	2
XBB.1.5.16	VOI GRA (XBB.1.5+XBB.1.5.*)												1
XBB.1.5.19	VOI GRA (XBB.1.5+XBB.1.5.*)												5
XBB.1.5.2	VOI GRA (XBB.1.5+XBB.1.5.*)												1
XBB.1.5.31	VOI GRA (XBB.1.5+XBB.1.5.*)												2
XBB.1.5.52	VOI GRA (XBB.1.5+XBB.1.5.*)												1
XBB.1.5.67	VOI GRA (XBB.1.5+XBB.1.5.*)												2
XBB.1.5.9	VOI GRA (XBB.1.5+XBB.1.5.*)												12
XBB.1.7	VUM GRA (XBB+XBB.* excluding XBB.1.5, XBB.1.16, XBB.1.9.1, XBB.1.9.2, XBB.2.3)											2	1
XBB.1.9	VUM GRA (XBB+XBB.* excluding XBB.1.5, XBB.1.16, XBB.1.9.1, XBB.1.9.2, XBB.2.3)											4	2
XBB.1.9.4	VUM GRA (XBB+XBB.* excluding XBB.1.5, XBB.1.16, XBB.1.9.1, XBB.1.9.2, XBB.2.3)											1	3
XBB.2	VUM GRA (XBB+XBB.* excluding XBB.1.5, XBB.1.16, XBB.1.9.1, XBB.1.9.2, XBB.2.3)											1
XBB.2.5	VUM GRA (XBB+XBB.* excluding XBB.1.5, XBB.1.16, XBB.1.9.1, XBB.1.9.2, XBB.2.3)												2
XBB.2.6	VUM GRA (XBB+XBB.* excluding XBB.1.5, XBB.1.16, XBB.1.9.1, XBB.1.9.2, XBB.2.3)												1
XBD	VOC Omicron GRA (B.1.1.529+BA.*)											1	2
XBE	VOC Omicron GRA (B.1.1.529+BA.*)												1
XBF	VOC Omicron GRA (B.1.1.529+BA.*)												1

## Sheet: Mohawk 
Pango.lineage	Variant	2022-1	2022-2	2022-3	2022-4	2022-5	2022-6	2022-7	2022-8	2022-9	2022-10	2022-11	2022-12
AY.103	VOC Delta GK (B.1.617.2+AY.*)	1
AY.3	VOC Delta GK (B.1.617.2+AY.*)	1
AY.44	VOC Delta GK (B.1.617.2+AY.*)	3
BA.2.7	VOC Omicron GRA (B.1.1.529+BA.*)				1
BA.5.1.10	VOC Omicron GRA (B.1.1.529+BA.*)									1
BA.5.1.12	VOC Omicron GRA (B.1.1.529+BA.*)							1		1
BA.5.2.32	VOC Omicron GRA (B.1.1.529+BA.*)												2
BE.1.4.1	VOC Omicron GRA (B.1.1.529+BA.*)										1
BQ.1	VOC Omicron GRA (B.1.1.529+BA.*)											1	1
BQ.1.1.52	VOC Omicron GRA (B.1.1.529+BA.*)												1
EB.1	VOC Omicron GRA (B.1.1.529+BA.*)												1
XBB.1.5.9	VOI GRA (XBB.1.5+XBB.1.5.*)												1

## Sheet: Mid-Hudson
Pango.lineage	Variant	2022-1	2022-2	2022-3	2022-4	2022-5	2022-6	2022-7	2022-8	2022-9	2022-10	2022-11	2022-12
AY.100	VOC Delta GK (B.1.617.2+AY.*)	1
AY.103	VOC Delta GK (B.1.617.2+AY.*)	6
AY.122.4	VOC Delta GK (B.1.617.2+AY.*)	1
AY.127	VOC Delta GK (B.1.617.2+AY.*)	1
AY.20	VOC Delta GK (B.1.617.2+AY.*)	1
AY.25	VOC Delta GK (B.1.617.2+AY.*)	1
AY.25.1	VOC Delta GK (B.1.617.2+AY.*)	4
AY.3	VOC Delta GK (B.1.617.2+AY.*)	1
AY.36	VOC Delta GK (B.1.617.2+AY.*)	1
AY.39	VOC Delta GK (B.1.617.2+AY.*)	2	1
AY.39.1	VOC Delta GK (B.1.617.2+AY.*)	2
AY.43	VOC Delta GK (B.1.617.2+AY.*)	2
AY.44	VOC Delta GK (B.1.617.2+AY.*)	5
AY.46.1	VOC Delta GK (B.1.617.2+AY.*)	1
B.1.1.529	VOC Omicron GRA (B.1.1.529+BA.*)	1
BA.1.1.13	VOC Omicron GRA (B.1.1.529+BA.*)	1
BA.1.1.14	VOC Omicron GRA (B.1.1.529+BA.*)	9	1
BA.1.1.2	VOC Omicron GRA (B.1.1.529+BA.*)	2
BA.1.1.8	VOC Omicron GRA (B.1.1.529+BA.*)	1
BA.1.15.1	VOC Omicron GRA (B.1.1.529+BA.*)	1
BA.1.17	VOC Omicron GRA (B.1.1.529+BA.*)	8
BA.1.18	VOC Omicron GRA (B.1.1.529+BA.*)	9
BA.1.19	VOC Omicron GRA (B.1.1.529+BA.*)	1
BA.1.20	VOC Omicron GRA (B.1.1.529+BA.*)	10		1							1
BA.1.23	VOC Omicron GRA (B.1.1.529+BA.*)			1
BA.2.1	VOC Omicron GRA (B.1.1.529+BA.*)				2	1	1
BA.2.10	VOC Omicron GRA (B.1.1.529+BA.*)	1	3	2	1	2
BA.2.12	VOC Omicron GRA (B.1.1.529+BA.*)				1	1
BA.2.13	VOC Omicron GRA (B.1.1.529+BA.*)					1	2
BA.2.18	VOC Omicron GRA (B.1.1.529+BA.*)						1	2
BA.2.20	VOC Omicron GRA (B.1.1.529+BA.*)					1
BA.2.21	VOC Omicron GRA (B.1.1.529+BA.*)				1
BA.2.23	VOC Omicron GRA (B.1.1.529+BA.*)					3
BA.2.23.1	VOC Omicron GRA (B.1.1.529+BA.*)					1	1
BA.2.26	VOC Omicron GRA (B.1.1.529+BA.*)			6	5	2
BA.2.3.15	VOC Omicron GRA (B.1.1.529+BA.*)				1	1
BA.2.3.17	VOC Omicron GRA (B.1.1.529+BA.*)					1
BA.2.3.20	VOC Omicron GRA (B.1.1.529+BA.*)									1
BA.2.38	VOC Omicron GRA (B.1.1.529+BA.*)							1
BA.2.40	VOC Omicron GRA (B.1.1.529+BA.*)					1
BA.2.48	VOC Omicron GRA (B.1.1.529+BA.*)				1	2	1
BA.2.6	VOC Omicron GRA (B.1.1.529+BA.*)					3
BA.2.64	VOC Omicron GRA (B.1.1.529+BA.*)						1
BA.2.7	VOC Omicron GRA (B.1.1.529+BA.*)			1			1
BA.2.73	VOC Omicron GRA (B.1.1.529+BA.*)				1
BA.2.75	VUM GRA (BA.2.75+BA.2.75.*)										1	1
BA.2.8	VOC Omicron GRA (B.1.1.529+BA.*)						1
BA.2.9.2	VOC Omicron GRA (B.1.1.529+BA.*)				1
BA.5.1.10	VOC Omicron GRA (B.1.1.529+BA.*)							4	2	5	3	1
BA.5.1.12	VOC Omicron GRA (B.1.1.529+BA.*)									5	1
BA.5.1.17	VOC Omicron GRA (B.1.1.529+BA.*)									1
BA.5.1.18	VOC Omicron GRA (B.1.1.529+BA.*)								2	1
BA.5.1.2	VOC Omicron GRA (B.1.1.529+BA.*)						3	1		2
BA.5.1.23	VOC Omicron GRA (B.1.1.529+BA.*)							2	1	1		1
BA.5.1.24	VOC Omicron GRA (B.1.1.529+BA.*)							1
BA.5.1.25	VOC Omicron GRA (B.1.1.529+BA.*)						1		2	1	1
BA.5.1.3	VOC Omicron GRA (B.1.1.529+BA.*)						1		1
BA.5.1.35	VOC Omicron GRA (B.1.1.529+BA.*)									2
BA.5.1.36	VOC Omicron GRA (B.1.1.529+BA.*)									1
BA.5.1.5	VOC Omicron GRA (B.1.1.529+BA.*)								1	3		4
BA.5.1.6	VOC Omicron GRA (B.1.1.529+BA.*)							3	2
BA.5.1.7	VOC Omicron GRA (B.1.1.529+BA.*)								2		1
BA.5.1.9	VOC Omicron GRA (B.1.1.529+BA.*)									1
BA.5.10	VOC Omicron GRA (B.1.1.529+BA.*)										1
BA.5.2.16	VOC Omicron GRA (B.1.1.529+BA.*)								1
BA.5.2.18	VOC Omicron GRA (B.1.1.529+BA.*)									1
BA.5.2.2	VOC Omicron GRA (B.1.1.529+BA.*)									2
BA.5.2.22	VOC Omicron GRA (B.1.1.529+BA.*)								1	2
BA.5.2.24	VOC Omicron GRA (B.1.1.529+BA.*)									1
BA.5.2.26	VOC Omicron GRA (B.1.1.529+BA.*)						1			1
BA.5.2.27	VOC Omicron GRA (B.1.1.529+BA.*)								1		1
BA.5.2.28	VOC Omicron GRA (B.1.1.529+BA.*)									1
BA.5.2.3	VOC Omicron GRA (B.1.1.529+BA.*)					1	1		2	2
BA.5.2.31	VOC Omicron GRA (B.1.1.529+BA.*)								2		1
BA.5.2.34	VOC Omicron GRA (B.1.1.529+BA.*)										1
BA.5.2.37	VOC Omicron GRA (B.1.1.529+BA.*)									1
BA.5.2.53	VOC Omicron GRA (B.1.1.529+BA.*)									1
BA.5.2.58	VOC Omicron GRA (B.1.1.529+BA.*)												1
BA.5.2.6	VOC Omicron GRA (B.1.1.529+BA.*)										3	2	1
BA.5.3	VOC Omicron GRA (B.1.1.529+BA.*)						1
BA.5.3.1	VOC Omicron GRA (B.1.1.529+BA.*)								1
BA.5.3.5	VOC Omicron GRA (B.1.1.529+BA.*)										1
BA.5.5.1	VOC Omicron GRA (B.1.1.529+BA.*)									2	1
BA.5.5.3	VOC Omicron GRA (B.1.1.529+BA.*)									1
BA.5.6.1	VOC Omicron GRA (B.1.1.529+BA.*)								1
BA.5.6.2	VOC Omicron GRA (B.1.1.529+BA.*)								2
BA.5.9	VOC Omicron GRA (B.1.1.529+BA.*)									1
BE.1.1.1	VOC Omicron GRA (B.1.1.529+BA.*)											1	1
BE.1.1.2	VOC Omicron GRA (B.1.1.529+BA.*)								1	1
BE.1.2	VOC Omicron GRA (B.1.1.529+BA.*)									1
BE.1.4	VOC Omicron GRA (B.1.1.529+BA.*)					1		2	1
BE.1.4.2	VOC Omicron GRA (B.1.1.529+BA.*)										2	1
BE.4	VOC Omicron GRA (B.1.1.529+BA.*)							1	2
BE.4.2	VOC Omicron GRA (B.1.1.529+BA.*)												1
BF.1	VOC Omicron GRA (B.1.1.529+BA.*)						1	1
BF.1.1	VOC Omicron GRA (B.1.1.529+BA.*)					1	1
BF.11	VOC Omicron GRA (B.1.1.529+BA.*)								1	4	1		1
BF.13	VOC Omicron GRA (B.1.1.529+BA.*)							2	2	7	6	1
BF.14	VOC Omicron GRA (B.1.1.529+BA.*)										1
BF.25	VOC Omicron GRA (B.1.1.529+BA.*)							1	1	5
BF.3	VOC Omicron GRA (B.1.1.529+BA.*)							1
BF.32	VOC Omicron GRA (B.1.1.529+BA.*)								1	1
BF.39	VOC Omicron GRA (B.1.1.529+BA.*)						1		1
BF.4	VOC Omicron GRA (B.1.1.529+BA.*)						1
BF.40	VOC Omicron GRA (B.1.1.529+BA.*)								1		1
BF.41	VOC Omicron GRA (B.1.1.529+BA.*)									1
BF.6	VOC Omicron GRA (B.1.1.529+BA.*)								1
BF.7	VOC Omicron GRA (B.1.1.529+BA.*)							1		2	5	2	3
BF.7.4	VOC Omicron GRA (B.1.1.529+BA.*)								1		2		1
BF.7.4.1	VOC Omicron GRA (B.1.1.529+BA.*)									1		2
BF.7.5	VOC Omicron GRA (B.1.1.529+BA.*)										1
BF.7.6	VOC Omicron GRA (B.1.1.529+BA.*)										1
BF.8	VOC Omicron GRA (B.1.1.529+BA.*)						2
BG.2	VOC Omicron GRA (B.1.1.529+BA.*)						1
BL.1	VUM GRA (BA.2.75+BA.2.75.*)									1
BN.1	VUM GRA (BA.2.75+BA.2.75.*)											2	3
BN.1.2	VUM GRA (BA.2.75+BA.2.75.*)												1
BN.1.3.1	VUM GRA (BA.2.75+BA.2.75.*)											1
BN.1.4.1	VUM GRA (BA.2.75+BA.2.75.*)											1
BN.1.4.5	VUM GRA (BA.2.75+BA.2.75.*)											1
BN.1.5	VUM GRA (BA.2.75+BA.2.75.*)											1
BN.1.7	VUM GRA (BA.2.75+BA.2.75.*)												1
BN.2.1	VUM GRA (BA.2.75+BA.2.75.*)										1
BN.6	VUM GRA (BA.2.75+BA.2.75.*)								1
BQ.1	VOC Omicron GRA (B.1.1.529+BA.*)									1	9	36	17
BQ.1.1.11	VOC Omicron GRA (B.1.1.529+BA.*)												1
BQ.1.1.18	VOC Omicron GRA (B.1.1.529+BA.*)										2	1
BQ.1.1.2	VOC Omicron GRA (B.1.1.529+BA.*)										1
BQ.1.1.25	VOC Omicron GRA (B.1.1.529+BA.*)											2	1
BQ.1.1.3	VOC Omicron GRA (B.1.1.529+BA.*)										4	8	8
BQ.1.1.4	VOC Omicron GRA (B.1.1.529+BA.*)											4	2
BQ.1.1.43	VOC Omicron GRA (B.1.1.529+BA.*)											1
BQ.1.1.5	VOC Omicron GRA (B.1.1.529+BA.*)										1	2
BQ.1.1.51	VOC Omicron GRA (B.1.1.529+BA.*)											1	1
BQ.1.1.52	VOC Omicron GRA (B.1.1.529+BA.*)												1
BQ.1.1.68	VOC Omicron GRA (B.1.1.529+BA.*)										2	5	5
BQ.1.1.69	VOC Omicron GRA (B.1.1.529+BA.*)												1
BQ.1.1.7	VOC Omicron GRA (B.1.1.529+BA.*)												1
BQ.1.10	VOC Omicron GRA (B.1.1.529+BA.*)												1
BQ.1.11	VOC Omicron GRA (B.1.1.529+BA.*)											6	4
BQ.1.12	VOC Omicron GRA (B.1.1.529+BA.*)										1		1
BQ.1.13	VOC Omicron GRA (B.1.1.529+BA.*)										1	3	1
BQ.1.14	VOC Omicron GRA (B.1.1.529+BA.*)									1	3	1	3
BQ.1.18	VOC Omicron GRA (B.1.1.529+BA.*)												1
BQ.1.2	VOC Omicron GRA (B.1.1.529+BA.*)											7	4
BQ.1.2.3	VOC Omicron GRA (B.1.1.529+BA.*)										1		1
BQ.1.27	VOC Omicron GRA (B.1.1.529+BA.*)										1	1	1
BQ.1.3	VOC Omicron GRA (B.1.1.529+BA.*)											1
BQ.1.3.2	VOC Omicron GRA (B.1.1.529+BA.*)									1	1	7	8
BQ.1.31	VOC Omicron GRA (B.1.1.529+BA.*)												1
BQ.1.5	VOC Omicron GRA (B.1.1.529+BA.*)											3	1
BQ.1.6	VOC Omicron GRA (B.1.1.529+BA.*)									1	1
BQ.1.8	VOC Omicron GRA (B.1.1.529+BA.*)												1
BQ.1.9	VOC Omicron GRA (B.1.1.529+BA.*)												1
BR.1.2	VUM GRA (BA.2.75+BA.2.75.*)											1
BU.1	VOC Omicron GRA (B.1.1.529+BA.*)											1
BY.1	VUM GRA (BA.2.75+BA.2.75.*)									1
CA.1	VUM GRA (BA.2.75+BA.2.75.*)									1	1	1
CA.3	VUM GRA (BA.2.75+BA.2.75.*)									1
CA.5	VUM GRA (BA.2.75+BA.2.75.*)										3	2
CA.7	VUM GRA (BA.2.75+BA.2.75.*)										1
CH.1.1	VUM GRA (CH.1.1+CH.1.1.*)												1
CK.1.5	VOC Omicron GRA (B.1.1.529+BA.*)											1
CK.2.1.1	VOC Omicron GRA (B.1.1.529+BA.*)												2
CK.3	VOC Omicron GRA (B.1.1.529+BA.*)										1
CL.1	VOC Omicron GRA (B.1.1.529+BA.*)											2
CP.1	VOC Omicron GRA (B.1.1.529+BA.*)										1
CP.1.1	VOC Omicron GRA (B.1.1.529+BA.*)											1
CP.6	VOC Omicron GRA (B.1.1.529+BA.*)											1
CQ.2	VOC Omicron GRA (B.1.1.529+BA.*)										1	5	9
CZ.2	VOC Omicron GRA (B.1.1.529+BA.*)											1
DC.1	VOC Omicron GRA (B.1.1.529+BA.*)										1
DY.2	VOC Omicron GRA (B.1.1.529+BA.*)												1
ED.2	VOC Omicron GRA (B.1.1.529+BA.*)										1	1
EE.1	VOC Omicron GRA (B.1.1.529+BA.*)												1
EE.5	VOC Omicron GRA (B.1.1.529+BA.*)											1	1
EF.1	VOC Omicron GRA (B.1.1.529+BA.*)											1
XAJ	VOC Omicron GRA (B.1.1.529+BA.*)									1
XBB	VUM GRA (XBB+XBB.* excluding XBB.1.5, XBB.1.16, XBB.1.9.1, XBB.1.9.2, XBB.2.3)											2	3
XBB.1.11	VUM GRA (XBB+XBB.* excluding XBB.1.5, XBB.1.16, XBB.1.9.1, XBB.1.9.2, XBB.2.3)												1
XBB.1.5.11	VOI GRA (XBB.1.5+XBB.1.5.*)											1	1
XBB.1.5.13	VOI GRA (XBB.1.5+XBB.1.5.*)											1	1
XBB.1.5.15	VOI GRA (XBB.1.5+XBB.1.5.*)												1
XBB.1.5.16	VOI GRA (XBB.1.5+XBB.1.5.*)												5
XBB.1.5.17	VOI GRA (XBB.1.5+XBB.1.5.*)												1
XBB.1.5.33	VOI GRA (XBB.1.5+XBB.1.5.*)												5
XBB.1.5.48	VOI GRA (XBB.1.5+XBB.1.5.*)											1
XBB.1.5.51	VOI GRA (XBB.1.5+XBB.1.5.*)												1
XBB.1.5.66	VOI GRA (XBB.1.5+XBB.1.5.*)												1
XBB.1.5.67	VOI GRA (XBB.1.5+XBB.1.5.*)												1
XBB.1.5.7	VOI GRA (XBB.1.5+XBB.1.5.*)												2
XBB.2.6	VUM GRA (XBB+XBB.* excluding XBB.1.5, XBB.1.16, XBB.1.9.1, XBB.1.9.2, XBB.2.3)												1
XBB.6	VUM GRA (XBB+XBB.* excluding XBB.1.5, XBB.1.16, XBB.1.9.1, XBB.1.9.2, XBB.2.3)												1
XBE	VOC Omicron GRA (B.1.1.529+BA.*)								1
XE	VOC Omicron GRA (B.1.1.529+BA.*)					1

## Sheet: Southern 
Pango.lineage	Variant	2022-1	2022-2	2022-3	2022-4	2022-5	2022-6	2022-7	2022-8	2022-9	2022-10	2022-11	2022-12
AY.100	VOC Delta GK (B.1.617.2+AY.*)	1
AY.103	VOC Delta GK (B.1.617.2+AY.*)	4
AY.118	VOC Delta GK (B.1.617.2+AY.*)	1
AY.119	VOC Delta GK (B.1.617.2+AY.*)	1
AY.25	VOC Delta GK (B.1.617.2+AY.*)	1
AY.25.1	VOC Delta GK (B.1.617.2+AY.*)	2								1
AY.3	VOC Delta GK (B.1.617.2+AY.*)	3
AY.4	VOC Delta GK (B.1.617.2+AY.*)	1
AY.44	VOC Delta GK (B.1.617.2+AY.*)	3
BA.1.1.1	VOC Omicron GRA (B.1.1.529+BA.*)	2
BA.1.1.14	VOC Omicron GRA (B.1.1.529+BA.*)	13	8
BA.1.1.2	VOC Omicron GRA (B.1.1.529+BA.*)	1
BA.1.15.1	VOC Omicron GRA (B.1.1.529+BA.*)	1
BA.1.17	VOC Omicron GRA (B.1.1.529+BA.*)	2
BA.1.18	VOC Omicron GRA (B.1.1.529+BA.*)	2
BA.1.4	VOC Omicron GRA (B.1.1.529+BA.*)		1
BA.2.62	VOC Omicron GRA (B.1.1.529+BA.*)				1
BA.2.7	VOC Omicron GRA (B.1.1.529+BA.*)				2
BA.5.1.10	VOC Omicron GRA (B.1.1.529+BA.*)								1				1
BA.5.1.18	VOC Omicron GRA (B.1.1.529+BA.*)											1	2
BA.5.1.23	VOC Omicron GRA (B.1.1.529+BA.*)							1
BA.5.1.24	VOC Omicron GRA (B.1.1.529+BA.*)							1
BA.5.1.27	VOC Omicron GRA (B.1.1.529+BA.*)											1
BA.5.1.5	VOC Omicron GRA (B.1.1.529+BA.*)								1
BA.5.2.28	VOC Omicron GRA (B.1.1.529+BA.*)												2
BA.5.2.31	VOC Omicron GRA (B.1.1.529+BA.*)								1
BA.5.2.33	VOC Omicron GRA (B.1.1.529+BA.*)											1
BA.5.2.35	VOC Omicron GRA (B.1.1.529+BA.*)												1
BA.5.2.56	VOC Omicron GRA (B.1.1.529+BA.*)											2
BA.5.2.6	VOC Omicron GRA (B.1.1.529+BA.*)										2	1
BA.5.2.60	VOC Omicron GRA (B.1.1.529+BA.*)												1
BA.5.5.1	VOC Omicron GRA (B.1.1.529+BA.*)										2
BE.1.4	VOC Omicron GRA (B.1.1.529+BA.*)									1
BE.1.4.1	VOC Omicron GRA (B.1.1.529+BA.*)								1
BF.11	VOC Omicron GRA (B.1.1.529+BA.*)									1	1	1
BF.13	VOC Omicron GRA (B.1.1.529+BA.*)											2	2
BF.32	VOC Omicron GRA (B.1.1.529+BA.*)									1			1
BF.7	VOC Omicron GRA (B.1.1.529+BA.*)										1	3	2
BF.7.19	VOC Omicron GRA (B.1.1.529+BA.*)												1
BF.7.4	VOC Omicron GRA (B.1.1.529+BA.*)										2	1
BF.7.8	VOC Omicron GRA (B.1.1.529+BA.*)										1	2
BN.1.3	VUM GRA (BA.2.75+BA.2.75.*)											1	4
BQ.1	VOC Omicron GRA (B.1.1.529+BA.*)										1	1	1
BQ.1.1.10	VOC Omicron GRA (B.1.1.529+BA.*)											1
BQ.1.1.2	VOC Omicron GRA (B.1.1.529+BA.*)												1
BQ.1.1.3	VOC Omicron GRA (B.1.1.529+BA.*)										1
BQ.1.1.32	VOC Omicron GRA (B.1.1.529+BA.*)											1
BQ.1.1.52	VOC Omicron GRA (B.1.1.529+BA.*)										1
BQ.1.1.69	VOC Omicron GRA (B.1.1.529+BA.*)										1
BQ.1.1.7	VOC Omicron GRA (B.1.1.529+BA.*)												1
BQ.1.10.1	VOC Omicron GRA (B.1.1.529+BA.*)												1
BQ.1.11	VOC Omicron GRA (B.1.1.529+BA.*)										1
BQ.1.14	VOC Omicron GRA (B.1.1.529+BA.*)											1
BQ.1.3	VOC Omicron GRA (B.1.1.529+BA.*)												1
BQ.1.3.2	VOC Omicron GRA (B.1.1.529+BA.*)											1	1
BQ.1.5	VOC Omicron GRA (B.1.1.529+BA.*)											1
BQ.1.7	VOC Omicron GRA (B.1.1.529+BA.*)												1
BU.1	VOC Omicron GRA (B.1.1.529+BA.*)										1
CH.1.1.25	VUM GRA (CH.1.1+CH.1.1.*)												1
CK.1	VOC Omicron GRA (B.1.1.529+BA.*)												2
CK.2.1.1	VOC Omicron GRA (B.1.1.529+BA.*)												1
CN.2	VOC Omicron GRA (B.1.1.529+BA.*)											1
XBB.1.9	VUM GRA (XBB+XBB.* excluding XBB.1.5, XBB.1.16, XBB.1.9.1, XBB.1.9.2, XBB.2.3)											1
XBB.1.9.4	VUM GRA (XBB+XBB.* excluding XBB.1.5, XBB.1.16, XBB.1.9.1, XBB.1.9.2, XBB.2.3)												1
XBB.2.11.1	VUM GRA (XBB+XBB.* excluding XBB.1.5, XBB.1.16, XBB.1.9.1, XBB.1.9.2, XBB.2.3)												1

[truncated: 2 more sheets: North , Capital ]
